# Supplementary material for: Membrane characteristics tune activities of endosomal and autophagic human VPS34 complexes
Source: eLife. 2020 Jun 30;9:e58281. doi: 10.7554/eLife.58281 (PMC7326497; doi:10.7554/eLife.58281)
Supplement: Supplementary file 2. [file elife-58281-supp2.xlsx]

## Sheet: Sheet1
Supplementary File 2. Sources of lipids for GUVs and LUVs
Reagent type	Designation	Company	Catalogue number	Additional comments
Chemical compound	DOPC	Avanti Polar Lipids, Inc	850375C	Dissolved in chloroform
Chemical compound	DOPE	Avanti Polar Lipids, Inc	850725C	Dissolved in chloroform
Chemical compound	DOPS	Avanti Polar Lipids, Inc	840035C	Dissolved in chloroform
Chemical compound	Brain PC (Porcine)	Avanti Polar Lipids, Inc	840053C	Dissolved in chloroform
Chemical compound	Brain PE (Porcine)	Avanti Polar Lipids, Inc	840022C	Dissolved in chloroform
Chemical compound	Brain PS (Porcine)	Avanti Polar Lipids, Inc	840032C	Dissolved in chloroform
Chemical compound	Liver PI (mixed chain PI, Bovine)	Avanti Polar Lipids, Inc	840042C	Dissolved in chloroform
Chemical compound	DSPE-PEG(2000) Biotin	Avanti Polar Lipids, Inc	880129C	Dissolved in chloroform
Chemical compound	DO Liss Rhod PE	Avanti Polar Lipids, Inc	810150P	Dissolved in chloroform
Chemical compound	SOPC	Avanti Polar Lipids, Inc	850467C	Dissolved in chloroform
Chemical compound	SOPE	Avanti Polar Lipids, Inc	850758C	Dissolved in chloroform
Chemical compound	SOPS	Avanti Polar Lipids, Inc	840039C	Dissolved in chloroform
Chemical compound	DSPI	Avanti Polar Lipids, Inc	850143P	Dissolved in chloroform:methanol:H2O =20:9:1
Chemical compound	SAPI	Avanti Polar Lipids, Inc	850144P	Dissolved in chloroform:methanol:H2O =20:9:1
Chemical compound	DOPI	Avanti Polar Lipids, Inc	850149P	Dissolved in chloroform:methanol:H2O =20:9:1
Chemical compound	DOPI(3)P	Avanti Polar Lipids, Inc	850150P	Dissolved in chloroform
Chemical compound	DOPI(4)P	Avanti Polar Lipids, Inc	850151P	Dissolved in chloroform
Chemical compound	DOPI(4,5)P2	Avanti Polar Lipids, Inc	850155P	Dissolved in chloroform
Chemical compound	Cholesterol	Sigma	C2044	Dissolved in chloroform
Chemical compound	18:1 Sphingomyelin	Avanti Polar Lipids, Inc	860587c	Dissolved in chloroform
