# Supplementary material for: Membrane characteristics tune activities of endosomal and autophagic human VPS34 complexes
Source: eLife. 2020 Jun 30;9:e58281. doi: 10.7554/eLife.58281 (PMC7326497; doi:10.7554/eLife.58281)
Supplement: Supplementary file 4. [file elife-58281-supp4.xlsx]

## Sheet: Meta Data
Supplementary File 4. Summary of HDX results for complex I with Lipids
Protein			Overall
Number of peptides			455
Average Standard Deviation			0.0123139
Timepoints (min)			[0.005, 0.05, 0.5, 5, 50.0]
Significance Threshold			+/-5.0%
Mean Difference			-0.000282643
Number of Repeats			3
Mean Coverage			0.86275
Mean Redundancy			2.16
Protein			VPS34			Protein			VPS15			Protein			Beclin 1			Protein			ATG14L
Number of peptides			124			Number of peptides			188			Number of peptides			58			Number of peptides			85
Average Standard Deviation			0.0124905			Average Standard Deviation			0.0129239			Average Standard Deviation			0.0122721			Average Standard Deviation			0.011569
Timepoints (min)			[0.005, 0.05, 0.5, 5, 50.0]			Timepoints (min)			[0.005, 0.05, 0.5, 5, 50.0]			Timepoints (min)			[0.005, 0.05, 0.5, 5, 50.0]			Timepoints (min)			[0.005, 0.05, 0.5, 5, 50.0]
Significance Threshold			+/-5.0%			Significance Threshold			+/-5.0%			Significance Threshold			+/-5.0%			Significance Threshold			+/-5.0%
Mean Difference			-0.000505752			Mean Difference			-0.00368707			Mean Difference			0.00571924			Mean Difference			-0.002657
Number of Repeats			3			Number of Repeats			3			Number of Repeats			3			Number of Repeats			3
Coverage			0.882			Coverage			0.866			Coverage			0.851			Coverage			0.852
Redundancy			2.15			Redundancy			2.1			Redundancy			2			Redundancy			2.39

## Sheet: BECLIN 1 Summary
				Date:			01.01.19		SD	0.0122721															Unhide														for STDEV	Threshold Value=		0.5
Global Color scale				Experiment date:			25.12.18			0.00571924																														Threshold percent		0.02
0.1	0.35	0.7		Protein:			Beclin 1																																	t-threshold		2.776
				Instrument:			Waters Synapt G2 Si										-0.1	-0.05	-0.02	0.02	0.05	0.1
																													STDEVS					STDEVS
		Max Frac Deut		0.67		a	Apo					b	With Lipids						% Differences (Apo - With Lipids)										a	Default State				b	Lipids					Differences in Daltons (Differences >+/- 0.5Da Highlighted						t-test	*=assumes triplicate values, a p=0.05 test
Start	End	Mod	m/z	#D	RT	0.005	0.05	0.5	5	50		0.005	0.05	0.5	5	50	Start	End	0.005	0.05	0.5	5	50		avg		Start	End	0.005	0.05	0.5	5	50	0.005	0.05	0.5	5	50		0.005	0.05	0.5	5	50		0.005	0.05	0.5	5
17	27		1274.67	9	8.27-8.35	0.23068	0.26272	0.32379	0.506066	0.577704		0.247064	0.275381	0.338984	0.516898	0.593266	17	27	-0.0163839	-0.012661	-0.015194	-0.0108317	-0.0155617		-0.0141265		17	27	0.0166345	0.00948043	0.0112436	0.010673	0.00652255	0.0108886	0.0103259	0.0128083	0.0128197	0.00699934		-0.147455	-0.113949	-0.136746	-0.0974851	-0.140055		-1.42736	-1.56439	-1.54412	-1.12469
17	31		1724.85	13	9.81-9.87	0.345635	0.363565	0.40256	0.53718	0.599161		0.361911	0.384851	0.411571	0.520676	0.592574	17	31	-0.016276	-0.0212853	-0.00901056	0.0165041	0.00658726		-0.0046961		17	31	0.012133	0.010694	0.0121404	0.0181232	0.0200116	0.00445075	0.0128572	0.00641274	0.0102304	0.00988083		-0.211588	-0.276709	-0.117137	0.214554	0.0856343		-2.18136	-2.20454	-1.13669	1.37358
32	41		1214.71	9	8.03-8.09	0.689397	0.703541	0.709333	0.717972	0.724618		0.701267	0.701704	0.708113	0.71771	0.718567	32	41	-0.0118695	0.00183781	0.0012194	0.000262023	0.00605158		-0.000499735		32	41	0.0238172	0.0211172	0.0207	0.0283158	0.0225687	0.0215589	0.0338851	0.0203761	0.0205894	0.0219595		-0.106825	0.0165403	0.0109746	0.00235821	0.0544642		-0.639945	0.0797258	0.0727143	0.0129631
35	41		860.447	6	6.76-6.80	0.720599	0.718501	0.71609	0.722165	0.68656		0.731677	0.715034	0.706921	0.712034	0.685399	35	41	-0.0110781	0.00346642	0.00916915	0.0101308	0.00116119		0.0025699		35	41	0.0144863	0.0182769	0.00719453	0.010205	0.0076893	0.00477836	0.0130776	0.014441	0.00545672	0.00943234		-0.0664687	0.0207985	0.0550149	0.0607851	0.00696716		-1.25789	0.267157	0.984348	1.51631
42	48		728.455	5	10.13-10.17	0.672423	0.694839	0.707982	0.724009	0.722104		0.676075	0.703766	0.713907	0.717685	0.720897	42	48	-0.00365224	-0.00892716	-0.00592507	0.00632388	0.00120716		-0.00219469		42	48	0.00708716	0.0101681	0.00696478	0.0045794	0.00500448	0.016251	0.00484299	0.00741672	0.00631463	0.00111313		-0.0182612	-0.0446358	-0.0296254	0.0316194	0.00603582		-0.356805	-1.3729	-1.00867	1.4042
44	57		1397.76	11	8.56-8.62	0.0575555	0.0921815	0.11208	0.179726	0.279012		0.0609233	0.0992204	0.125675	0.204432	0.260159	44	57	-0.00336784	-0.00703881	-0.0135947	-0.0247057	0.0188528		-0.00597085		44	57	0.006146	0.00120991	0.00475373	0.0148837	0.0153928	0.00119471	0.00562849	0.0105733	0.0187028	0.0085559		-0.0370463	-0.0774269	-0.149542	-0.271763	0.207381		-0.931678	-2.11767	-2.03116	-1.79027
48	59		1260.61	10	4.94-4.95	0.705764	0.697669	0.698391	0.710873	0.702614		0.715018	0.694259	0.687671	0.699421	0.696982	48	59	-0.00925373	0.00340925	0.01072	0.0114524	0.00563224		0.00439203		48	59	0.0109496	0.0152743	0.00718642	0.00709328	0.00857284	0.00303313	0.0129925	0.00256254	0.00675239	0.00523821		-0.0925373	0.0340925	0.1072	0.114524	0.0563224		-1.41067	0.294474	2.43362	2.02547
49	59		1159.56	9	4.86-4.87	0.705106	0.678008	0.681051	0.690958	0.68482		0.709922	0.696965	0.67189	0.678024	0.681038	49	59	-0.00481592	-0.0189577	0.00916186	0.0129343	0.00378176		0.000420862		49	59	0.0115358	0.0225176	0.0113952	0.0177945	0.00611144	0.000810116	0.0091733	0.0151086	0.0174549	0.0103504		-0.0433433	-0.170619	0.0824567	0.116409	0.0340358		-0.721312	-1.35046	0.838551	0.898768
60	72		1481.63	11	9.97-10.01	0.436505	0.488372	0.478461	0.505389	0.492348		0.468245	0.479673	0.487651	0.502181	0.504588	60	72	-0.0317396	0.00869851	-0.00918942	0.00320787	-0.0122402		-0.00825256		60	72	0.0171034	0.0191843	0.0157645	0.00599593	0.0296479	0.0163159	0.0095403	0.014832	0.0100455	0.00434613		-0.349136	0.0956836	-0.101084	0.0352866	-0.134642		-2.32573	0.703192	-0.735344	0.474936
60	79		2220.99	17	9.20-9.25	0.528258	0.573931	0.575763	0.587174	0.580736		0.55234	0.574032	0.571512	0.589957	0.571923	60	79	-0.0240816	-0.000100702	0.00425066	-0.00278297	0.0088122		-0.00278047		60	79	0.0364052	0.00631089	0.0096777	0.0102102	0.00610132	0.0180252	0.0175163	0.0201199	0.0249219	0.0317665		-0.409387	-0.00171194	0.0722612	-0.0473104	0.149807		-1.02677	-0.00936818	0.32976	-0.178976
61	77		1905.85	14	12.80-12.82	0.194767	0.316747	0.349928	0.456316	0.600772		0.195784	0.298954	0.361351	0.470397	0.602072	61	77	-0.00101695	0.0177928	-0.0114228	-0.0140813	-0.00129957		-0.00200559		61	77	0.0180207	0.0139151	0.00343902	0.0136881	0.00092548	0.0133112	0.0120091	0.0129871	0.00918539	0.0059436		-0.0142373	0.249099	-0.159919	-0.197139	-0.018194		-0.0786209	1.67665	-1.47267	-1.47956
73	88		1883.02	12	7.57-7.65	0.654047	0.690977	0.7108	0.733922	0.737847		0.699912	0.697744	0.716214	0.720544	0.738851	73	88	-0.0458654	-0.00676729	-0.00541405	0.0133789	-0.00100473		-0.00913453		73	88	0.0132687	0.00984192	0.0173867	0.00824005	0.0292233	0.0141266	0.0156904	0.0170165	0.0150529	0.0194371		-0.550385	-0.0812075	-0.0649687	0.160546	-0.0120567		-4.09895	-0.632841	-0.385455	1.35035
89	96		826.325	7	5.17-5.18	0.658296	0.660618	0.660097	0.658122	0.656755		0.679257	0.65668	0.648325	0.652542	0.643324	89	96	-0.0209614	0.00393817	0.0117712	0.00557953	0.0134305		0.0027516		89	96	0.0102697	0.0059661	0.00440554	0.00737271	0.000269083	0.00665437	0.00907079	0.00224414	0.00841599	0.0138902		-0.14673	0.0275672	0.0823985	0.0390567	0.0940134		-2.96689	0.62827	4.1237	0.863736
92	105		1440.65	13	11.49-11.55	0.422784	0.454707	0.459157	0.465548	0.475365		0.416577	0.469355	0.465796	0.469762	0.480158	92	105	0.00620643	-0.0146485	-0.00663949	-0.00421412	-0.00479219		-0.00481757		92	105	0.0140909	0.0129774	0.00754133	0.0101752	0.0240177	0.0230272	0.00570471	0.00800586	0.0104765	0.00939977		0.0806836	-0.19043	-0.0863134	-0.0547836	-0.0622985		0.398195	-1.78979	-1.0456	-0.499783
97	112		1654.76	15	12.34-12.37	0.566208	0.558609	0.580917	0.61384	0.622939		0.569953	0.549039	0.584825	0.595405	0.609183	97	112	-0.00374537	0.00956955	-0.00390756	0.0184346	0.0137566		0.00682157		97	112	0.0132727	0.00828199	0.0204988	0.00524886	0.0108877	0.0163996	0.0167272	0.0040003	0.00913224	0.0118035		-0.0561806	0.143543	-0.0586134	0.276519	0.206349		-0.307483	0.888014	-0.324057	3.03134
100	112		1293.56	12	9.63-9.64	0.523897	0.522249	0.529497	0.540955	0.563259		0.521024	0.525082	0.536986	0.541009	0.551417	100	112	0.00287313	-0.00283321	-0.00748818	-5.34826e-05	0.011842		0.00086806		100	112	0.0097046	0.0075893	0.0157121	0.0062704	0.0127561	0.0113235	0.00247587	0.00602002	0.01473	0.00921169		0.0344776	-0.0339985	-0.0898582	-0.000641791	0.142104		0.333694	-0.614718	-0.770832	-0.00578638
112	121		1144.68	9	5.99-6.07	0.0489075	0.0516837	0.115082	0.208401	0.32757		0.044265	0.0606428	0.0956216	0.221688	0.326743	112	121	0.00464245	-0.00895904	0.0194605	-0.0132874	0.000827363		0.000536783		112	121	0.00750415	0.019168	0.0144211	0.00699685	0.0124051	0.00701841	0.0102176	0.00688292	0.00332289	0.0048995		0.0417821	-0.0806313	0.175145	-0.119587	0.00744627		0.782596	-0.714394	2.10938	-2.97121
113	122		1144.68	9	6.84-6.93	0.437255	0.572399	0.578601	0.581768	0.597052		0.440151	0.568107	0.579305	0.587053	0.592766	113	122	-0.00289552	0.00429154	-0.000703151	-0.00528507	0.00428557		-6.13267e-05		113	122	0.0248924	0.0170647	0.0149821	0.0139529	0.0117355	0.0367149	0.0144408	0.0147796	0.0139041	0.0165725		-0.0260597	0.0386239	-0.00632836	-0.0475657	0.0385701		-0.113062	0.332508	-0.0578704	-0.46472
123	137		1677.72	13	11.12-11.17	0.259994	0.4283	0.477037	0.500517	0.546447		0.25856	0.434698	0.492523	0.52886	0.535933	123	137	0.00143318	-0.00639828	-0.0154868	-0.0283423	0.0105133		-0.00765617		123	137	0.00900758	0.00557623	0.0126338	0.0126777	0.0148644	0.0207392	0.0136239	0.0221548	0.0102495	0.00424386		0.0186313	-0.0831776	-0.201328	-0.368449	0.136673		0.109786	-0.752818	-1.05176	-3.01118
123	139		1935.81	15	10.95-11.00	0.233695	0.370075	0.411136	0.454611	0.505446		0.219497	0.371711	0.408566	0.446965	0.501321	123	139	0.0141983	-0.00163582	0.00257015	0.00764567	0.00412458		0.00538058		123	139	0.0102692	0.00804149	0.00456786	0.0149655	0.0113479	0.0195404	0.0151213	0.0125057	0.0174066	0.011971		0.212975	-0.0245373	0.0385522	0.114685	0.0618687		1.11406	-0.165435	0.334362	0.576886
125	136		1312.62	10	8.28-8.36	0.228746	0.248532	0.28428	0.454745	0.50524		0.214672	0.25489	0.29918	0.453549	0.522186	125	136	0.0140739	-0.00635761	-0.0149006	0.00119582	-0.0169452		-0.00458675		125	136	0.00602746	0.0157788	0.0157482	0.0184049	0.00862567	0.00102642	0.00660164	0.0113049	0.00119164	0.00198821		0.140739	-0.0635761	-0.149006	0.0119582	-0.169452		3.98687	-0.643803	-1.33132	0.112301
146	158		1518.69	12	11.05-11.12	0.0272201	0.0823272	0.0844464	0.117304	0.115009		0.0426047	0.0786032	0.07729	0.114988	0.0926775	146	158	-0.0153846	0.003724	0.00715634	0.00231592	0.022332		0.00402873		146	158	0.0236667	0.00419988	0.00561318	0.00632537	0.0104423	0.0064153	0.00496915	0.0185832	0.0205904	0.00594154		-0.184615	0.0446881	0.0858761	0.027791	0.267984		-1.08671	0.991378	0.638515	0.186224
153	161		1050.42	8	5.77-5.78	0.0534963	0.127883	0.255993	0.563049	0.720967		0.0674631	0.130706	0.205231	0.518168	0.713568	153	161	-0.0139668	-0.00282257	0.0507616	0.0448815	0.00739925		0.0172506		153	161	0.00656306	0.0122082	0.0144336	0.0146765	0.00862239	0.0213784	0.0133935	0.00801362	0.0240748	0.0238028		-0.111734	-0.0225806	0.406093	0.359052	0.059194		-1.08175	-0.269766	5.32568	2.75706
163	172		1262.66	9	8.01-8.09	0.439512	0.455992	0.428366	0.474303	0.494596		0.409698	0.472818	0.456996	0.48732	0.48767	163	172	0.0298136	-0.016826	-0.0286303	-0.0130171	0.0069262		-0.00434673		163	172	0.0084005	0.00972139	0.0481333	0.0449605	0.014275	0.0252199	0.0237083	0.0345967	0.0281872	0.0185493		0.268322	-0.151434	-0.257673	-0.117154	0.0623358		1.94261	-1.13735	-0.836569	-0.424874
201	212		1412.82	11	6.78-6.85	0.00325821	0.0264011	0.0506355	0.183981	0.393855		0.0290726	0.0326653	0.0542418	0.126642	0.27237	201	212	-0.0258144	-0.00626418	-0.00360624	0.0573395	0.121485		0.0286279		201	212	0.0198566	0.0139232	0.015043	0.0165189	0.0215535	0.011872	0.0117275	0.00971927	0.0209577	0.040509		-0.283958	-0.068906	-0.0396687	0.630734	1.33633		-1.93265	-0.596011	-0.348761	3.72173
211	224		1642.84	13	5.40-5.43	0.61384	0.662535	0.639224	0.659908	0.659532		0.631411	0.662919	0.648117	0.653349	0.677364	211	224	-0.017571	-0.000383812	-0.00889242	0.00655913	-0.0178316		-0.00762393		211	224	0.0301505	0.00423341	0.0114383	0.00726154	0.0129556	0.00132354	0.00960723	0.0117679	0.0163947	0.0093062		-0.228422	-0.00498955	-0.115601	0.0852687	-0.23181		-1.00842	-0.0633209	-0.938529	0.633585
227	236		1320.59	9	10.72-10.78	0.264273	0.315354	0.324382	0.463913	0.566144		0.271672	0.316259	0.364384	0.467876	0.575696	227	236	-0.00739967	-0.000904809	-0.040002	-0.00396318	-0.0095524		-0.0123644		227	236	0.00447861	0.00846816	0.00920116	0.00433831	0.0149637	0.00827148	0.00684262	0.00709071	0.0060801	0.0101025		-0.066597	-0.00814328	-0.360018	-0.0356687	-0.0859716		-1.36258	-0.143947	-5.96448	-0.919036
236	247		1533.79	11	6.43-6.50	0.00233704	0.00471221	0.0100294	0.00430244	-0.0141084		0.0101312	0.00237924	-0.0100011	-0.000572999	-0.00671479	236	247	-0.00779417	0.00233297	0.0200305	0.00487544	-0.00739362		0.00241023		236	247	0.0125128	0.0138805	0.0124459	0.0154685	0.0198141	0.0108984	0.0141605	0.0180446	0.0106677	0.0186347		-0.0857358	0.0256627	0.220336	0.0536299	-0.0813299		-0.813566	0.203784	1.58271	0.449408
244	261		2168.03	17	11.31-11.35	0.0276329	0.0352447	0.0345544	0.0447594	0.114588		0.0342831	0.0392077	0.0421311	0.0540874	0.121372	244	261	-0.00665013	-0.00396304	-0.00757665	-0.00932801	-0.00678393		-0.00686035		244	261	0.00660378	0.00498025	0.00452976	0.00352362	0.00828525	0.00154249	0.00821238	0.00521018	0.00424723	0.0216314		-0.113052	-0.0673716	-0.128803	-0.158576	-0.115327		-1.69849	-0.714686	-1.90081	-2.92766
262	270		1092.64	8	7.01-7.09	0.160965	0.263663	0.310113	0.399415	0.487172		0.137692	0.221099	0.211347	0.308274	0.421332	262	270	0.0232729	0.0425632	0.098766	0.0911414	0.0658401		0.0643168		262	270	0.012761	0.013064	0.0159088	0.0186052	0.0381388	0.0205138	0.00839067	0.0187774	0.00855131	0.0316451		0.186184	0.340506	0.790128	0.729131	0.526721		1.66852	4.74813	6.95099	7.70947
262	274		1525.84	12	9.63-9.71	0.100351	0.169657	0.222792	0.309395	0.447862		0.0896208	0.159087	0.190823	0.244935	0.387182	262	274	0.0107299	0.0105698	0.0319684	0.0644604	0.0606803		0.0356818		262	274	0.0164738	0.00846953	0.0242439	0.0180111	0.00777575	0.0274193	0.023407	0.0101114	0.0247414	0.0222516		0.128758	0.126837	0.383621	0.773525	0.728164		0.580997	0.735469	2.10792	3.64831
275	287		1510.72	12	8.55-8.65	0.0691004	0.114983	0.164731	0.217481	0.284252		0.0937277	0.112401	0.152848	0.196436	0.26658	275	287	-0.0246274	0.00258159	0.0118823	0.0210448	0.0176723		0.00571072		275	287	0.0144272	0.00465199	0.00756592	0.00582376	0.00797177	0.00699092	0.010797	0.00786082	0.0140343	0.0253744		-0.295528	0.0309791	0.142588	0.252537	0.212067		-2.6607	0.380337	1.88636	2.39891
276	294		2213.17	17	5.53-5.65	0.116785	0.157916	0.184581	0.179992	0.208648		0.132174	0.151687	0.188936	0.193396	0.2005	276	294	-0.0153888	0.00622836	-0.00435549	-0.0134042	0.00814881		-0.00375426		276	294	0.0127415	0.0118157	0.0155445	0.022516	0.010895	0.00962616	0.0089381	0.0147658	0.0214681	0.0163892		-0.261609	0.105882	-0.0740433	-0.227872	0.13853		-1.66911	0.728142	-0.351868	-0.746273
288	302		1798.96	12	11.27-11.38	0.162981	0.202837	0.233301	0.358298	0.430004		0.157001	0.173056	0.193268	0.315713	0.333303	288	302	0.00597998	0.029781	0.0400335	0.0425843	0.0967015		0.043016		288	302	0.00750609	0.0104764	0.00742985	0.0255132	0.0144729	0.00641443	0.0141346	0.016058	0.00948122	0.00861505		0.0717597	0.357372	0.480401	0.511012	1.16042		1.04903	2.93184	3.91895	2.70991
290	303		1608.87	11	6.82-6.86	0.679672	0.683405	0.696839	0.718643	0.717414		0.697576	0.700082	0.720064	0.719537	0.711918	290	303	-0.0179041	-0.0166767	-0.0232254	-0.000893758	0.00549607		-0.0106408		290	303	0.00404233	0.0129958	0.00550271	0.0159577	0.00697164	0.00656744	0.0095711	0.00816418	0.0173685	0.00524233		-0.196945	-0.183443	-0.255479	-0.00983134	0.0604567		-4.02122	-1.78965	-4.08588	-0.0656329
297	304		1000.47	6	10.95-10.98	0.212915	0.282302	0.379009	0.426277	0.48307		0.197287	0.257954	0.338482	0.409586	0.434227	297	304	0.0156276	0.0243478	0.0405276	0.0166915	0.0488425		0.0292074		297	304	0.0127893	0.0239331	0.0378226	0.0157998	0.0394192	0.00689527	0.00717786	0.0279025	0.0173908	0.0209831		0.0937657	0.146087	0.243166	0.100149	0.293055		1.86294	1.68779	1.4935	1.23044
305	312		845.452	7	11.42-11.47	0.0128305	0.0277586	0.0307252	0.0272132	0.0292846		0.014929	0.0250936	0.0278369	0.0229789	0.0229819	305	312	-0.00209851	0.00266503	0.00288827	0.00423433	0.00630277		0.00279838		305	312	0.0125505	0.00337676	0.00474371	0.00306311	0.00802132	0.00650597	0.00507633	0.00689232	0.00705053	0.0106618		-0.0146896	0.0186552	0.0202179	0.0296403	0.0441194		-0.257114	0.757107	0.5979	0.954066
306	312		774.414	6	11.29-11.33	0.0159883	0.0297032	0.0221649	0.0214744	0.0214736		0.00160025	0.0207045	0.0208799	0.0242985	0.0186886	306	312	0.0143881	0.00899876	0.00128507	-0.00282413	0.00278507		0.00492657		306	312	0.00835299	0.00593408	0.00556642	0.00784055	0.00423682	0.00397488	0.00636269	0.00769876	0.00658806	0.00140373		0.0863284	0.0539925	0.00771045	-0.0169448	0.0167104		2.694	1.79145	0.234289	-0.477645
313	323		1180.69	10	9.73-9.92	0.0447028	0.0383584	0.038811	0.070466	0.0893403		0.0338293	0.04827	0.0321872	0.0493484	0.0776124	313	323	0.0108736	-0.00991164	0.00662388	0.0211176	0.0117279		0.00808627		313	323	0.00125821	0.0143824	0.014229	0.00514209	0.00482119	0.00277582	0.00868836	0.00516925	0.0063694	0.00840955		0.108736	-0.0991164	0.0662388	0.211176	0.117279		6.17968	-1.02169	0.757845	4.46822
313	325		1455.85	12	10.20-10.56	0.0688351	0.146387	0.172441	0.198032	0.226937		0.0662779	0.155533	0.193614	0.184682	0.254106	313	325	0.00255721	-0.00914627	-0.0211729	0.0133495	-0.0271694		-0.00831637		313	325	0.0135669	0.0144649	0.0186373	0.017093	0.0235867	0.0142961	0.0307985	0.0148455	0.0144164	0.0130246		0.0306866	-0.109755	-0.254075	0.160194	-0.326033		0.224732	-0.465577	-1.5391	1.03404
326	339		1765.91	12	9.27-9.41	0.0203646	0.033585	0.0472387	0.119286	0.182263		0.024149	0.0287568	0.0497649	0.110711	0.147848	326	339	-0.00378445	0.00482811	-0.00252624	0.00857488	0.0344152		0.00830149		326	339	0.00199316	0.00122774	0.00451866	0.0227493	0.00864279	2.70854e-06	0.00287935	0.00306356	0.00992649	0.0120713		-0.0454134	0.0579373	-0.0303149	0.102899	0.412982		-3.28868	2.67158	-0.801496	0.598378
328	342		1810.91	13	6.98-7.02	0.0797858	0.0893153	0.10641	0.229387	0.46497		0.0751669	0.0887893	0.109634	0.228745	0.44758	328	342	0.00461883	0.000525947	-0.00322457	0.00064225	0.0173907		0.00399063		328	342	0.000758439	0.00416073	0.0102201	0.00637245	0.0126457	0.0018465	0.0127657	0.0156994	0.00812445	0.00157061		0.0600448	0.00683731	-0.0419194	0.00834925	0.226079		4.00765	0.0678479	-0.298145	0.107735
340	359		2243.14	18	11.28-11.37	0.410981	0.449642	0.49519	0.5375	0.565629		0.402443	0.425939	0.454668	0.494253	0.509481	340	359	0.00853806	0.0237024	0.0405217	0.0432471	0.0561478		0.0344314		340	359	0.0117007	0.00908723	0.0104565	0.00815249	0.0123642	0.0151341	0.013422	0.00751368	0.00957164	0.02093		0.153685	0.426643	0.729391	0.778448	1.01066		0.773057	2.5328	5.45086	5.95772
342	359		2027.06	16	11.03-11.13	0.347893	0.391469	0.442852	0.478874	0.484619		0.336232	0.38339	0.398067	0.425077	0.45179	342	359	0.011661	0.00807957	0.0447854	0.0537968	0.0328287		0.0302303		342	359	0.0120496	0.0122597	0.0180836	0.001975	0.0128923	0.0272548	0.0079403	0.0176257	0.00663993	0.0331572		0.186576	0.129273	0.716566	0.860749	0.52526		0.677776	0.958085	3.07182	13.4507
343	359		1913.98	15	11.00-11.09	0.370264	0.405149	0.453734	0.488729	0.493931		0.350852	0.390249	0.409202	0.414687	0.431922	343	359	0.0194124	0.0148999	0.0445322	0.0740424	0.0620093		0.0429792		343	359	0.0153384	0.0135478	0.0129395	0.00433393	0.00753622	0.0113076	0.0194112	0.00843512	0.00936607	0.0289628		0.291187	0.223499	0.667984	1.11064	0.930139		1.76446	1.09023	4.99363	12.4266
360	369		1310.56	9	10.21-10.33	0.0868544	0.103543	0.11553	0.185425	0.206043		0.078302	0.0857292	0.124487	0.170221	0.198026	360	369	0.0085524	0.0178143	-0.00895672	0.0152038	0.00801692		0.00812614		360	369	0.00359038	0.00149502	0.00643284	0.00210299	0.00470083	0.0182949	0.0084995	0.00979569	0.00587363	0.0206211		0.0769716	0.160328	-0.0806104	0.136834	0.0721522		0.794536	3.57535	-1.32378	4.221
377	389		1607.8	12	11.28-11.38	0.4016	0.430711	0.475272	0.57852	0.610428		0.354912	0.435481	0.483996	0.482608	0.583257	377	389	0.0466874	-0.00477015	-0.00872363	0.0959113	0.0271711		0.0312552		377	389	0.00921206	0.0159673	0.0392158	0.0106175	0.0145372	0.00466978	0.0127607	0.0389068	0.0195731	0.0301104		0.560249	-0.0572418	-0.104684	1.15094	0.326054		7.82964	-0.404216	-0.273522	7.46036
379	390		1498.75	11	7.30-7.37	0.255468	0.28604	0.306909	0.364326	0.383072		0.259089	0.270678	0.276468	0.329574	0.357068	379	390	-0.00362117	0.0153615	0.0304412	0.0347514	0.0260035		0.0205873		379	390	0.00931764	0.0105567	0.00457327	0.00633392	0.00419946	0.0159794	0.012398	0.017109	0.0122012	0.00809199		-0.0398328	0.168976	0.334854	0.382266	0.286039		-0.339075	1.63397	2.97724	4.3784
381	391		1326.6	10	6.30-6.35	0.046647	0.0828996	0.130073	0.210529	0.318311		0.0485084	0.089693	0.131954	0.235707	0.337569	381	391	-0.00186134	-0.00679343	-0.00188075	-0.0251779	-0.0192585		-0.0109944		381	391	0.00659119	0.00227254	0.0161852	0.0110706	0.00612134	0.00669149	0.0105012	0.010701	0.00359552	0.0117507		-0.0186134	-0.0679343	-0.0188075	-0.251779	-0.192585		-0.343245	-1.09515	-0.167889	-3.74656
395	417		2415.18	22	6.14-6.18	0.0353874	0.0549757	0.0718929	0.108486	0.117735		0.0378557	0.0536164	0.0903275	0.106624	0.121964	395	417	-0.00246832	0.00135936	-0.0184345	0.00186187	-0.00422822		-0.00438197		395	417	0.00427585	0.00326784	0.00133969	0.00381845	0.0029709	0.00183311	0.00324566	0.0045941	0.0029249	0.00433569		-0.054303	0.029906	-0.40556	0.0409612	-0.0930209		-0.91897	0.511204	-6.67222	0.670456
397	412		1535.72	15	5.50-5.52	0.290947	0.347856	0.371446	0.421242	0.438556		0.263652	0.313609	0.312002	0.345795	0.372969	397	412	0.0272949	0.0342463	0.0594438	0.075447	0.0655869		0.0524038		397	412	0.00910547	0.0143569	0.0168629	0.0194429	0.01478	0.00760637	0.0215992	0.0200928	0.0142389	0.02928		0.409424	0.513694	0.891657	1.1317	0.983803		3.98468	2.28707	3.92507	5.4225
400	418		1912.96	18	13.28-13.30	0.0664742	0.0821203	0.0792366	0.125007	0.224946		0.0543542	0.101161	0.0938255	0.150245	0.21435	400	418	0.01212	-0.0190409	-0.014589	-0.0252375	0.0105951		-0.00723045		400	418	0.0119931	0.0110357	0.0408094	0.0426897	0.0219098	0.00742512	0.0218663	0.0306754	0.0216449	0.0333793		0.21816	-0.342736	-0.262601	-0.454275	0.190712		1.48824	-1.34648	-0.494956	-0.913276
406	420		1503.71	14	12.26-12.28	0.303143	0.415118	0.446659	0.467202	0.511393		0.302226	0.412811	0.442419	0.472289	0.524897	406	420	0.000916738	0.00230704	0.00424009	-0.00508657	-0.0135035		-0.00222525		406	420	0.0191243	0.0160915	0.0124333	0.0200812	0.0145977	0.0188181	0.0184471	0.0129035	0.0187913	0.0114763		0.0128343	0.0322985	0.0593612	-0.0712119	-0.189049		0.0591809	0.163237	0.409849	-0.320346
410	424		1674.76	14	7.02-7.06	0.167471	0.209813	0.239847	0.346799	0.376807		0.183941	0.210485	0.226604	0.337059	0.416739	410	424	-0.0164696	-0.000671215	0.0132431	0.00973923	-0.0399322		-0.00681814		410	424	0.00402441	0.0180603	0.0120894	0.0141318	0.01368	0.00749328	0.015108	0.00908881	0.0180438	0.00314062		-0.230575	-0.00939701	0.185403	0.136349	-0.559051		-3.35382	-0.0493742	1.51656	0.736016
420	431		1480.74	11	11.04-11.12	0.0338611	0.0624543	0.0809209	0.12659	0.120925		0.0493095	0.0650875	0.0831658	0.101453	0.102401	420	431	-0.0154484	-0.00263324	-0.00224491	0.0251366	0.0185235		0.0046667		420	431	0.00426716	0.00427436	0.0137095	0.00831845	0.00221777	0.00649769	0.00265142	0.0026654	0.0123596	0.00953623		-0.169933	-0.0289657	-0.024694	0.276503	0.203758		-3.4421	-0.906755	-0.278408	2.92237
429	446		2122.15	17	9.75-9.86	0.107765	0.206372	0.265355	0.390932	0.506062		0.104674	0.206396	0.282783	0.407457	0.529758	429	446	0.00309131	-2.39684e-05	-0.0174282	-0.0165244	-0.0236959		-0.0109162		429	446	0.0156547	0.0169766	0.0184217	0.00396655	0.0208292	0.00786778	0.00500378	0.00803898	0.00391607	0.0250076		0.0525522	-0.000407463	-0.296279	-0.280915	-0.40283		0.3056	-0.00234563	-1.50186	-5.13478
432	441		1146.63	9	11.84-11.91	0.0205227	0.0106358	0.0206738	0.0625658	0.0868582		-0.00198673	0.0101206	0.0332322	0.0688512	0.0815803	432	441	0.0225095	0.000515257	-0.0125584	-0.00628541	0.00527794		0.00189177		432	441	0.0112854	0.00874511	0.00872604	0.00323997	0.00250978	0.0111232	0.00874859	0.00496982	0.00315108	0.00404411		0.202585	0.00463731	-0.113025	-0.0565687	0.0475015		2.46045	0.0721469	-2.16607	-2.40877
435	446		1388.73	11	6.53-6.60	0.151365	0.234628	0.29633	0.349338	0.457479		0.149234	0.261133	0.328001	0.375525	0.443717	435	446	0.00213039	-0.0265058	-0.0316716	-0.0261874	0.0137619		-0.0136945		435	446	0.00714138	0.0049962	0.0109364	0.0124224	0.0125046	0.0128472	0.00294966	0.0118313	0.00485305	0.012275		0.0234343	-0.291564	-0.348388	-0.288061	0.151381		0.25104	-7.91277	-3.4048	-3.40098
[truncated: 8 more columns]

## Sheet: VPS15 Summary
Vps15				Date:			01.01.19		SD	0.0129239															Unhide														for STDEV	Threshold Value=		0.5
Global Color scale				Experiment date:			25.12.18			-0.00368707																														Threshold percent		0.02
0.1	0.35	0.7		Protein:			VPS15																																	t-threshold		2.776
				Instrument:			Waters Synapt G2 Si										-0.1	-0.05	-0.02	0.02	0.05	0.1
																													STDEVS					STDEVS
		Max Frac Deut		0.67		a	Apo					b	With Lipids						% Differences (Apo - With Lipids)										a	Default State				b	Lipids					Differences in Daltons (Differences >+/- 0.5Da Highlighted						t-test	*=assumes triplicate values, a p=0.05 test
Start	End	Mod	m/z	#D	RT	0.005	0.05	0.5	5	50		0.005	0.05	0.5	5	50	Start	End	0.005	0.05	0.5	5	50		avg		Start	End	0.005	0.05	0.5	5	50	0.005	0.05	0.5	5	50		0.005	0.05	0.5	5	50		0.005	0.05	0.5	5
26	37		1449.7	11	9.64-9.72	0.219388	0.318936	0.350225	0.442429	0.543815		0.227453	0.329469	0.377336	0.450014	0.568142	26	37	-0.008	-0.0105326	-0.0271115	-0.00758548	-0.0243273		-0.0155114		26	37	0.0125604	0.00537151	0.0107881	0.000236635	0.00955468	0.00628779	0.000786296	0.0063749	0.0147503	0.0139501		-0.088	-0.115858	-0.298227	-0.0834403	-0.2676		-0.994443	-3.36043	-3.74744	-0.890607
28	37		1173.59	9	8.12-8.21	0.26467	0.343155	0.391223	0.501459	0.559989		0.232597	0.351061	0.391374	0.483309	0.58928	28	37	0.0320736	-0.00790647	-0.00015141	0.0181501	-0.0292907		0.00257502		28	37	0.00366086	0.00687496	0.00405158	0.0181032	0.00487231	0.0234995	0.0192426	0.0108955	0.00712537	0.0256882		0.288663	-0.0711582	-0.00136269	0.163351	-0.263616		2.33584	-0.670181	-0.0225601	1.61588
38	49		1411.83	11	5.27-5.39	0.0373863	0.0543867	0.0887381	0.12936	0.17511		0.042848	0.0590448	0.105029	0.14825	0.190986	38	49	-0.00546174	-0.00465807	-0.0162909	-0.0188902	-0.0158764		-0.0122355		38	49	0.0141769	0.0139581	0.0142216	0.0162646	0.019194	0.0140092	0.0135646	0.0098962	0.0129172	0.0140639		-0.0600791	-0.0512388	-0.1792	-0.207793	-0.17464		-0.474638	-0.414522	-1.62858	-1.5753
55	71		1964.04	14	11.61-11.65	0.319896	0.447324	0.525673	0.637301	0.718668		0.317356	0.455999	0.530208	0.646954	0.72438	55	71	0.00254062	-0.00867473	-0.00453497	-0.0096532	-0.00571247		-0.00520695		55	71	0.0123423	0.00291525	0.00761535	0.00525991	0.000898721	0.015659	0.00559861	0.00641365	0.00473934	0.000720362		0.0355687	-0.121446	-0.0634896	-0.135145	-0.0799746		0.220705	-2.38035	-0.788925	-2.36152
72	78		900.551	6	9.45-9.54	0.0130724	0.0304998	0.0447823	0.0577806	0.255771		-0.00114254	0.0333813	0.0287644	0.0682649	0.244455	72	78	0.0142149	-0.00288159	0.0160179	-0.0104843	0.0113164		0.00563667		72	78	0.0145119	0.018046	0.0173398	0.0215938	0.0281055	0.0179801	0.00738134	0.0256985	0.0218505	0.0383803		0.0852896	-0.0172896	0.0961075	-0.062906	0.0678985		1.06557	-0.255988	0.894924	-0.591121
75	92		2047.08	16	8.90-8.98	0.193915	0.304169	0.381374	0.467911	0.606491		0.208887	0.309316	0.387802	0.473067	0.604519	75	92	-0.014972	-0.0051472	-0.00642771	-0.00515616	0.00197229		-0.00594616		75	92	0.0103785	0.00850541	0.00509804	0.0101496	0.0141984	0.00976996	0.0155391	0.011876	0.00868461	0.00758778		-0.239552	-0.0823552	-0.102843	-0.0824985	0.0315567		-1.81934	-0.503271	-0.861429	-0.668565
79	92		1536.71	12	8.89-8.97	0.158875	0.218108	0.263707	0.321108	0.350592		0.177102	0.258584	0.274077	0.328652	0.380657	79	92	-0.0182275	-0.0404765	-0.01037	-0.00754391	-0.0300647		-0.0213365		79	92	0.0252856	0.00984639	0.01415	0.00285572	0.0107172	0.00135535	0.0431726	0.011167	0.00354428	0.00669888		-0.21873	-0.485718	-0.12444	-0.0905269	-0.360776		-1.24679	-1.58323	-0.996434	-2.87073
79	100		2353.13	20	8.61-8.67	0.307538	0.395306	0.460508	0.57189	0.67662		0.31753	0.394689	0.465525	0.56776	0.681227	79	100	-0.00999201	0.000617015	-0.00501746	0.00412993	-0.00460634		-0.00297378		79	100	0.0144131	0.0111296	0.0179599	0.0154808	0.00356007	0.0110141	0.00642873	0.00626903	0.00707381	0.0115455		-0.19984	0.0123403	-0.100349	0.0825985	-0.0921269		-0.954077	0.083149	-0.456851	0.420274
83	101		2066.04	17	9.02-9.50	0.34128	0.41034	0.624185	0.652722	0.694938		0.3603	0.420391	0.613203	0.675724	0.744093	83	101	-0.0190198	-0.0100514	0.0109816	-0.0230028	-0.0491553		-0.0180495		83	101	0.0116828	0.0149551	0.000943986	0.00997428	0.0195183	0.0166845	0.00859745	0.0150754	0.00204838	0.0126299		-0.323336	-0.170873	0.186687	-0.391048	-0.83564		-1.61739	-1.00923	1.25923	-3.91282
92	106		1770.92	14	7.12-7.17	0.731766	0.755371	0.760144	0.7791	0.777309		0.758074	0.777073	0.752871	0.789372	0.797405	92	106	-0.026308	-0.0217018	0.00727292	-0.0102717	-0.0200961		-0.0142209		92	106	0.00677942	0.00958923	0.0098774	0.00151429	0.0182755	0.00241876	0.0132698	0.0100142	0.00466684	0.0242135		-0.368312	-0.303825	0.101821	-0.143804	-0.281345		-6.33049	-2.29591	0.895581	-3.62614
92	113		2703.37	21	9.17-9.24	0.0782232	0.233991	0.477954	0.621092	0.761126		0.104949	0.245581	0.488954	0.647907	0.75882	92	113	-0.0267262	-0.0115893	-0.0110005	-0.0268154	0.00230654		-0.014765		92	113	0.0130681	0.00641208	0.0161446	0.0299147	0.0119364	0.0214739	0.0205701	0.0145863	0.010376	0.019874		-0.561251	-0.243376	-0.23101	-0.563122	0.0484373		-1.8415	-0.931637	-0.875701	-1.46687
93	101		948.518	8	6.78-6.87	0.300503	0.303365	0.382421	0.507043	0.636124		0.320356	0.308414	0.381142	0.528354	0.627599	93	101	-0.0198532	-0.00504869	0.0012791	-0.0213108	0.00852481		-0.00728175		93	101	0.0250177	0.014275	0.0211047	0.0100205	0.0236192	0.0137093	0.0138709	0.00541045	0.0179946	0.0112196		-0.158825	-0.0403896	0.0102328	-0.170487	0.0681985		-1.20538	-0.439334	0.101687	-1.79212
101	110		1323.72	9	9.07-9.20	0.0583358	0.0304861	0.0450566	0.176808	0.297414		0.0489299	0.0419871	0.0905434	0.213188	0.281585	101	110	0.00940597	-0.011501	-0.0454869	-0.0363806	0.0158289		-0.0136267		101	110	0.0140852	0.00338823	0.0124947	0.00714312	0.0103352	0.00809801	0.0128413	0.00444312	0.00917828	0.00864229		0.0846537	-0.103509	-0.409382	-0.327425	0.14246		1.00273	-1.49994	-5.94108	-5.41799
102	108		983.506	6	6.57-6.63	0.0241338	0.0751948	0.113597	0.268846	0.362528		0.0564632	0.0925831	0.116425	0.27451	0.370628	102	108	-0.0323294	-0.0173883	-0.00282786	-0.00566393	-0.00810025		-0.0132619		102	108	0.0165988	0.0164664	0.00698109	0.0196159	0.027753	0.00801517	0.0102465	0.0130995	0.00741891	0.0350005		-0.193976	-0.10433	-0.0169672	-0.0339836	-0.0486015		-3.03788	-1.55291	-0.329974	-0.467777
111	120		1267.68	8	9.95-10.04	0.0740047	0.132252	0.137615	0.225134	0.337762		0.0478879	0.11717	0.161949	0.217388	0.32568	111	120	0.0261168	0.0150823	-0.024334	0.00774627	0.0120819		0.00733866		111	120	0.00723041	0.0142043	0.0151274	0.029805	0.0112103	0.0225099	0.0135513	0.0194285	0.0279802	0.0138642		0.208934	0.120658	-0.194672	0.0619701	0.0966552		1.91331	1.33067	-1.7117	0.328197
111	124		1737.89	12	9.98-10.05	0.116968	0.230052	0.239744	0.32247	0.414572		0.145427	0.238282	0.24151	0.322254	0.417437	111	124	-0.0284587	-0.00822948	-0.0017658	0.000216667	-0.0028648		-0.00822042		111	124	0.0130058	0.00570585	0.0211896	0.00746766	0.00410609	0.0157327	0.00434017	0.0101372	0.0196042	0.0113956		-0.341504	-0.0987537	-0.0211896	0.0026	-0.0343776		-2.41479	-1.98828	-0.130205	0.0178888
121	130		1290.7	9	10.98-11.09	0.0398121	0.089158	0.0933091	0.113969	0.113442		0.0405698	0.0872891	0.0901688	0.0931144	0.0999567	121	130	-0.000757711	0.00186899	0.0031403	0.0208547	0.0134852		0.00771831		121	130	0.0198589	0.0192572	0.0249808	0.0300567	0.0314862	0.0261411	0.0203643	0.0197622	0.0190227	0.0290459		-0.0068194	0.0168209	0.0282627	0.187693	0.121367		-0.0399769	0.1155	0.170761	1.01548
134	153		2163.09	19	5.00-5.02	0.0383382	0.0582817	0.0823833	0.112081	0.119481		0.0370493	0.0595504	0.0855239	0.112897	0.126368	134	153	0.00128892	-0.00126874	-0.00314053	-0.000816496	-0.00688641		-0.00216465		134	153	0.0110969	0.00834619	0.0100089	0.0076674	0.00741343	0.00633126	0.0057956	0.00690126	0.00991115	0.00503394		0.0244896	-0.024106	-0.0596701	-0.0155134	-0.130842		0.174741	-0.216267	-0.447424	-0.112859
134	154		2262.16	20	5.53-5.55	0.0185354	0.040669	0.0638831	0.103466	0.116675		0.0277835	0.0438851	0.0745731	0.102965	0.117433	134	154	-0.00924813	-0.00321619	-0.01069	0.000501045	-0.000758209		-0.0046823		134	154	0.0118483	0.0101811	0.0119462	0.00951813	0.0116057	0.0105349	0.0107881	0.00919604	0.0105847	0.00907948		-0.184963	-0.0643239	-0.2138	0.0100209	-0.0151642		-1.01033	-0.375537	-1.22817	0.0609655
136	155		2221.11	19	5.88-5.94	0.0276162	0.0488926	0.0706892	0.107294	0.110755		0.0413841	0.0479421	0.0783534	0.109809	0.117626	136	155	-0.0137679	0.000950511	-0.00766426	-0.00251485	-0.00687156		-0.00597362		136	155	0.0160101	0.0155931	0.0168683	0.0155046	0.0170031	0.016168	0.0169157	0.0146457	0.0164355	0.0164901		-0.261591	0.0180597	-0.145621	-0.0477821	-0.13056		-1.04804	0.0715604	-0.594244	-0.192782
148	175		3318.68	26	17.34-17.43	0.238563	0.306475	0.339119	0.430762	0.469682		0.271121	0.325803	0.339921	0.397562	0.460324	148	175	-0.0325584	-0.0193278	-0.000802296	0.0331995	0.00935809		-0.00202617		148	175	0.0408251	0.0111464	0.0239983	0.0168694	0.00914466	0.0146735	0.0166567	0.0127761	0.0175862	0.0347089		-0.846518	-0.502522	-0.0208597	0.863188	0.24331		-1.29991	-1.67032	-0.0511129	2.35968
156	163		1004.52	7	13.62-13.63	0.00750853	0.0214267	0.00100768	0.0232614	0.0959981		0.0134215	0.0143224	0.0184682	0.0349947	0.0978503	156	163	-0.00591301	0.00710426	-0.0174606	-0.0117333	-0.00185224		-0.00597096		156	163	0.00615267	0.0108861	0.0241256	0.0230597	0.0060452	0.00593774	0.00965608	0.0131243	0.00816866	0.004742		-0.041391	0.0497299	-0.122224	-0.0821328	-0.0129657		-1.19777	0.84561	-1.10116	-0.830722
157	163		905.452	6	13.58-13.60	0.039093	0.0433358	0.0519585	0.0502933	0.0757968		0.0462152	0.0439896	0.054808	0.0500734	0.0707025	157	163	-0.00712214	-0.000653731	-0.0028495	0.0002199	0.00509428		-0.00106224		157	163	0.0179279	0.00881891	0.0210408	0.0137632	0.0344883	0.0103249	0.0124903	0.0117828	0.00974527	0.0137231		-0.0427328	-0.00392239	-0.017097	0.0013194	0.0305657		-0.596271	-0.0740552	-0.204661	0.0225853
166	176		1285.65	8	7.57-7.62	0.0942489	0.238563	0.286922	0.502542	0.67581		0.0875345	0.242245	0.295141	0.497127	0.734026	166	176	0.00671437	-0.00368228	-0.0082194	0.00541549	-0.0582162		-0.0115976		166	176	0.0142381	0.0134118	0.0118304	0.02528	0.0455513	0.000363806	0.00325112	0.00514478	0.0177056	0.0292832		0.0537149	-0.0294582	-0.0657552	0.0433239	-0.46573		0.816532	-0.46216	-1.10354	0.303913
167	183		1958.92	13	11.64-11.69	0.069662	0.149001	0.225834	0.33179	0.465983		0.0703472	0.151095	0.23295	0.347067	0.475871	167	183	-0.000685189	-0.0020938	-0.0071163	-0.0152777	-0.00988806		-0.00701222		167	183	0.00891114	0.00627623	0.00805281	0.00563157	0.004493	0.00064535	0.00327738	0.0036729	0.0105579	0.00287451		-0.00890746	-0.0272194	-0.0925119	-0.19861	-0.128545		-0.132832	-0.512197	-1.39261	-2.21143
168	174		813.414	5	9.27-9.36	0.160768	0.253402	0.321826	0.323799	0.296244		0.197921	0.255969	0.308437	0.30387	0.304946	168	174	-0.0371531	-0.00256627	0.013389	0.0199287	-0.00870179		-0.00302072		168	174	0.0105227	0.00847701	0.0119009	0.00133522	0.0138699	0.00372687	0.00952179	0.0242997	0.0343319	0.0182546		-0.185766	-0.0128313	0.0669448	0.0996433	-0.043509		-5.76459	-0.348661	0.857077	1.00464
171	183		1506.71	9	10.13-10.17	0.0825957	0.188822	0.258622	0.35672	0.501183		0.0884214	0.19637	0.266336	0.371332	0.511606	171	183	-0.0058257	-0.00754776	-0.00771376	-0.0146116	-0.0104227		-0.00922431		171	183	0.0139022	0.00740547	0.0141048	0.00412438	0.0159207	0.0103972	0.00151045	0.00487297	0.013296	0.00629619		-0.0524313	-0.0679299	-0.0694239	-0.131504	-0.0938045		-0.581244	-1.72972	-0.895314	-1.81797
175	186		1441.63	9	8.97-9.00	0.542653	0.654116	0.75494	0.887716	0.927475		0.538932	0.67971	0.769947	0.891959	0.936644	175	186	0.00372073	-0.0255942	-0.015007	-0.00424362	-0.00916833		-0.0100585		175	186	0.0205206	0.0109678	0.0356799	0.0272746	0.0219633	0.0263451	0.0122078	0.0207262	0.0202572	0.0292479		0.0334866	-0.230348	-0.135063	-0.0381925	-0.0825149		0.192984	-2.70125	-0.629931	-0.216344
185	195		1451.68	10	7.69-7.80	0.0284307	0.0624842	0.104675	0.215558	0.324625		0.0531419	0.0670179	0.123008	0.214698	0.337874	185	195	-0.0247112	-0.00453373	-0.0183327	0.000860299	-0.0132497		-0.0119934		185	195	0.0104436	0.0148496	0.0122939	0.0115196	0.00681687	0.0085806	0.0163801	0.00984776	0.00423104	0.0181342		-0.247112	-0.0453373	-0.183327	0.00860299	-0.132497		-3.16658	-0.355175	-2.01585	0.121421
187	196		1304.62	9	6.29-6.35	0.0320592	0.0741423	0.123587	0.220231	0.342432		0.040305	0.0905375	0.135513	0.229809	0.350886	187	196	-0.00824577	-0.0163952	-0.0119264	-0.00957828	-0.0084534		-0.0109198		187	196	0.0184562	0.0147761	0.0115353	0.00980697	0.0102886	0.0149887	0.0129194	0.00656733	0.0113851	0.0122217		-0.0742119	-0.147557	-0.107337	-0.0862045	-0.0760806		-0.600696	-1.4468	-1.55623	-1.10405
197	207		1191.58	9	9.70-9.76	0.261588	0.301329	0.318802	0.329828	0.351675		0.26947	0.309448	0.334698	0.326165	0.356913	197	207	-0.00788209	-0.0081194	-0.015896	0.00366269	-0.00523715		-0.00669439		197	207	0.00809502	0.00730315	0.00728905	0.0109567	0.0126217	0.0167667	0.00710746	0.0106211	0.015162	0.00866932		-0.0709388	-0.0730746	-0.143064	0.0329642	-0.0471343		-0.733257	-1.37999	-2.13736	0.33913
197	208		1338.65	10	11.66-11.72	0.270545	0.325309	0.336889	0.367091	0.374541		0.270706	0.334575	0.349785	0.356793	0.373688	197	208	-0.000160299	-0.00926642	-0.012896	0.0102981	0.000852836		-0.00223436		197	208	0.00663687	0.00689433	0.0117784	0.00300896	0.000945373	0.0127879	0.00384	0.0109421	0.00399313	0.0059803		-0.00160299	-0.0926642	-0.12896	0.102981	0.00852836		-0.0192708	-2.0338	-1.38937	3.56743
209	221		1509.69	10	9.11-9.35	0.188448	0.270525	0.351415	0.376703	0.422663		0.203699	0.283926	0.342476	0.394477	0.421811	209	221	-0.0152503	-0.0134003	0.00893851	-0.0177737	0.00085194		-0.00732678		209	221	0.0181369	0.00863313	0.0114288	0.0153794	0.0201624	0.0120491	0.0154451	0.0133404	0.018514	0.00992373		-0.152503	-0.134003	0.0893851	-0.177737	0.0085194		-1.21309	-1.31174	0.881329	-1.27906
213	225		1535.74	10	11.16-11.22	0.574032	0.622255	0.617607	0.655305	0.630831		0.568484	0.624844	0.624602	0.636974	0.625809	213	225	0.00554806	-0.00258896	-0.00699463	0.0183306	0.00502194		0.0038634		213	225	0.0121172	0.0156642	0.0270133	0.0145999	0.00489164	0.0285981	0.01032	0.0122279	0.0149857	0.00598866		0.0554806	-0.0258896	-0.0699463	0.183306	0.0502194		0.309394	-0.239053	-0.408575	1.51753
216	235		2268.17	17	12.68-12.73	0.136975	0.191668	0.205252	0.25554	0.322229		0.1349	0.189952	0.201086	0.25917	0.326914	216	235	0.00207489	0.00171607	0.00416629	-0.00362932	-0.00468428		-7.1273e-05		216	235	0.012902	0.00603442	0.00610351	0.00789789	0.00179982	0.000738982	0.00566594	0.00706321	0.00730658	0.0122271		0.0352731	0.0291731	0.0708269	-0.0616985	-0.0796328		0.278091	0.359084	0.77303	-0.584254
225	234		1174.59	9	5.57-5.62	0.448222	0.503782	0.511682	0.548403	0.523072		0.432048	0.501827	0.514923	0.514365	0.508625	225	234	0.0161741	0.00195539	-0.00324113	0.034038	0.0144463		0.0126745		225	234	0.0133065	0.0166184	0.0243051	0.0163854	0.0050942	0.0134814	0.0199148	0.0185788	0.00566501	0.0176116		0.145567	0.0175985	-0.0291701	0.306342	0.130016		1.47893	0.130575	-0.183501	3.40055
237	246		1070.48	9	11.68-11.75	0.43947	0.481548	0.483144	0.497383	0.465427		0.471916	0.494971	0.492854	0.498353	0.462748	237	246	-0.0324463	-0.0134229	-0.00971078	-0.000969486	0.00267894		-0.0107741		237	246	0.0150136	0.00452056	0.00470614	0.00157479	0.0416614	0.00143566	0	0.00382736	0.00890779	0.0298081		-0.292016	-0.120806	-0.087397	-0.00872537	0.0241104		-3.72618	-5.14297	-2.77276	-0.18563
251	259		1022.56	7	13.47-13.49	0.0531267	0.0671369	0.0916277	0.212723	0.349037		0.0504168	0.072429	0.102797	0.208338	0.333048	251	259	0.00270981	-0.00529211	-0.0111689	0.00438507	0.0159889		0.00132456		251	259	0.00344691	0.00213305	0.00789638	0.00908038	0.0134192	0.00282431	0.0056371	0.00632154	0.00545864	0.0109075		0.0189687	-0.0370448	-0.0781821	0.0306955	0.111922		1.05325	-1.52081	-1.9125	0.716876
252	259		909.472	6	12.96-12.99	0.0137604	0.040651	0.0745751	0.20671	0.361445		0.0241435	0.0411405	0.0750077	0.209158	0.357298	252	259	-0.0103831	-0.000489552	-0.000432587	-0.00244751	0.00414726		-0.00192109		252	259	0.0180179	0.011257	0.00172836	0.00482413	0.00405821	0.00669403	0.00569303	0.00687488	0.00695348	0.00526368		-0.0622985	-0.00293731	-0.00259552	-0.0146851	0.0248836		-0.935634	-0.0672177	-0.105697	-0.500909
252	260		1024.5	7	12.36-12.40	0.00299915	0.0423426	0.0621846	0.165884	0.292236		0.0252373	0.0369426	0.0639394	0.172563	0.2886	252	260	-0.0222382	0.0054	-0.0017548	-0.00667889	0.00363603		-0.00432716		252	260	0.0126021	0.00561663	0.00631876	0.00901237	0.00357868	0.0047145	0.00697889	0.00371663	0.0103616	0.00525672		-0.155667	0.0378	-0.0122836	-0.0467522	0.0254522		-2.86268	1.04407	-0.414609	-0.842384
252	261		1137.58	8	13.57-13.59	0.0319647	0.0451375	0.0629289	0.169102	0.331184		0.0256847	0.04502	0.0690858	0.166567	0.317352	252	261	0.00628004	0.000117537	-0.0061569	0.00253507	0.0138317		0.00332149		252	261	0.00700466	0.00602481	0.0107989	0.0122873	0.0201019	0.00764757	0.0035597	0.00729235	0.0176241	0.0263466		0.0502403	0.000940299	-0.0492552	0.0202806	0.110654		1.04886	0.0290919	-0.818392	0.204374
265	278		1690.87	12	10.82-10.92	0.0824108	0.153383	0.228691	0.327017	0.360625		0.0875016	0.152627	0.244586	0.31073	0.353714	265	278	-0.0050908	0.000755846	-0.015895	0.0162871	0.0069107		0.000593557		265	278	0.0100527	0.00342836	0.025225	0.0108754	0.00683682	0.0119799	0.00757077	0.00787525	0.00929241	0.00823246		-0.0610896	0.00907015	-0.19074	0.195445	0.0829284		-0.563821	0.157525	-1.04182	1.97209
266	278		1577.79	11	10.29-10.39	0.0436494	0.13342	0.223054	0.331987	0.357793		0.058628	0.117614	0.2358	0.306751	0.337782	266	278	-0.0149786	0.0158058	-0.0127467	0.0252357	0.0200107		0.0066654		266	278	0.0138285	0.0121452	0.0121554	0.0316752	0.0322322	0.0354217	0.0165011	0.0128452	0.0216285	0.0332795		-0.164764	0.173864	-0.140213	0.277593	0.220118		-0.682273	1.33617	-1.24841	1.1396
279	288		1240.63	9	5.63-5.67	0.128935	0.160716	0.160568	0.23452	0.339358		0.138558	0.159967	0.165721	0.227487	0.335603	279	288	-0.00962255	0.000749585	-0.0051534	0.007033	0.00375489		-0.000647695		279	288	0.0122869	0.0229474	0.00867794	0.0145141	0.0131282	0.00777927	0.0177065	0.0132143	0.0118252	0.0161013		-0.086603	0.00674627	-0.0463806	0.063297	0.033794		-1.14607	0.0447935	-0.564613	0.65067
279	291		1553.83	12	9.12-9.24	0.292366	0.457849	0.529836	0.562022	0.577654		0.285318	0.464185	0.546403	0.573544	0.591226	279	291	0.00704876	-0.00633607	-0.0165668	-0.0115225	-0.0135719		-0.0081897		279	291	0.00965585	0.00881455	0.0169325	0.0104637	0.0101433	0.0293152	0.00854801	0.00638159	0.00683035	0.0079755		0.0845851	-0.0760328	-0.198801	-0.13827	-0.162863		0.395562	-0.89378	-1.58576	-1.59716
281	288		998.49	7	5.63-5.67	0.122621	0.130926	0.150408	0.226132	0.363347		0.118394	0.141849	0.144367	0.226594	0.355373	281	288	0.00422665	-0.010923	0.00604136	-0.00046162	0.00797399		0.00137147		281	288	0.0133192	0.00832281	0.0105113	0.0142896	0.0082226	0.00144542	0.00740959	0.00713817	0.0138111	0.0329868		0.0295866	-0.0764612	0.0422896	-0.00323134	0.0558179		0.546433	-1.69783	0.823548	-0.0402329
281	290		1210.64	9	8.11-8.19	0.0158935	0.0157088	0.0390706	0.140073	0.216414		0.00543367	0.0197672	0.0467494	0.145303	0.219897	281	290	0.0104599	-0.00405837	-0.00767877	-0.00522952	-0.00348292		-0.00199794		281	290	0.00700978	0.0106632	0.00941493	0.0124539	0.0128071	0.00991808	0.0060073	0.011842	0.00698441	0.014742		0.0941388	-0.0365254	-0.069109	-0.0470657	-0.0313463		1.49171	-0.574341	-0.879135	-0.634357
282	288		885.406	6	5.63-5.67	0.0997719	0.12589	0.14435	0.220495	0.370853		0.110666	0.118985	0.134379	0.22686	0.37236	282	288	-0.010894	0.00690522	0.00997164	-0.00636542	-0.00150622		-0.000377761		282	288	0.0109162	0.00738209	0.00173607	0.00667065	0.0138244	0.00244129	0.0087699	0.012602	0.00434801	0.0140552		-0.0653642	0.0414313	0.0598299	-0.0381925	-0.00903731		-1.68687	1.04335	1.35771	-1.38463
289	306		2180.11	16	7.15-7.21	0.0611557	0.0743983	0.104948	0.147156	0.254972		0.0545757	0.0970535	0.102321	0.16645	0.254091	289	306	0.00658004	-0.0226551	0.00262724	-0.0192936	0.000881063		-0.00637207		289	306	0.0104517	0.0111798	0.0120524	0.00791828	0.00632528	0.007025	0.00730718	0.020266	0.00779216	0.0214513		0.105281	-0.362482	0.0420358	-0.308697	0.014097		0.90501	-2.938	0.192989	-3.00805
293	306		1738.85	12	5.70-5.74	0.0253866	0.0872428	0.106687	0.165266	0.294477		0.0536373	0.0834016	0.111032	0.179673	0.294552	293	306	-0.0282507	0.00384117	-0.00434527	-0.0144065	-7.52488e-05		-0.00864731		293	306	0.0245455	0.0125794	0.0138544	0.0110643	0.0138894	0.0132456	0.00844266	0.0139504	0.0137823	0.0204568		-0.339009	0.046094	-0.0521433	-0.172878	-0.000902985		-1.75437	0.439152	-0.3828	-1.41183
294	306		1607.81	11	5.30-5.34	0.0522806	0.075773	0.0976436	0.18143	0.299349		0.0593833	0.0839449	0.115328	0.179126	0.305074	294	306	-0.00710271	-0.00817191	-0.0176845	0.00230488	-0.0057251		-0.00727588		294	306	0.00867598	0.00318182	0.0193349	0.0040791	0.0134129	0.00541506	0.00738697	0.00977001	0.00441588	0.00872822		-0.0781299	-0.089891	-0.19453	0.0253537	-0.0629761		-1.2029	-1.75979	-1.41395	0.664082
307	316		1224.65	9	7.13-7.19	0.0578708	0.0798819	0.140262	0.212936	0.384985		0.0466869	0.0698035	0.13477	0.216472	0.366935	307	316	0.0111839	0.0100784	0.00549204	-0.00353532	0.0180499		0.0082538		307	316	0.0130345	0.0111262	0.00801343	0.0106625	0.0104444	0.0062257	0.0081194	0.0161393	0.0128438	0.0132396		0.100655	0.090706	0.0494284	-0.0318179	0.162449		1.34103	1.26736	0.527908	-0.366825
307	320		1710.9	12	11.35-11.45	0.0907612	0.176234	0.215134	0.260212	0.366198		0.102647	0.174515	0.216023	0.255815	0.360823	307	320	-0.0118859	0.00171891	-0.000889303	0.00439664	0.00537512		-0.000256915		307	320	0.00856343	0.00473794	0.0078745	0.0087357	0.00486953	0.00938259	0.00345311	0.00380386	0.00998184	0.00455547		-0.142631	0.0206269	-0.0106716	0.0527597	0.0645015		-1.62065	0.507821	-0.176135	0.5741
307	321		1873.96	13	11.65-11.73	0.0933865	0.166899	0.201743	0.245956	0.34826		0.0863613	0.166607	0.201907	0.255784	0.333232	307	321	0.00702514	0.000291504	-0.000163605	-0.00982836	0.0150285		0.00247063		307	321	0.0105022	0.00969541	0.0249929	0.0091597	0.0209732	0.022763	0.0165676	0.0202489	0.0152873	0.0115865		0.0913269	0.00378955	-0.00212687	-0.127769	0.19537		0.485378	0.0263023	-0.00880964	-0.955215
321	331		1408.66	9	13.46-13.47	0.0727085	0.100671	0.178742	0.235568	0.331533		0.0675625	0.0954703	0.168292	0.210292	0.313519	321	331	0.00514594	0.00520083	0.0104496	0.025276	0.0180146		0.0128174		321	331	0.0133829	0.0178546	0.00914925	0.0056262	0.0170735	0.00589088	0.0129813	0.0222937	0.00380232	0.0156367		0.0463134	0.0468075	0.0940463	0.227484	0.162131		0.60956	0.408071	0.751064	6.44707
323	330		997.481	6	10.26-10.29	0.118284	0.152534	0.199708	0.228024	0.343479		0.10282	0.155793	0.190432	0.241216	0.332438	323	330	0.0154634	-0.00325896	0.00927637	-0.013192	0.0110418		0.00386612		323	330	0.0343903	0.00576667	0.0174764	0.0238806	0.0137634	0.00275398	0.0143438	0.0315333	0.0172109	0.021256		0.0927806	-0.0195537	0.0556582	-0.0791522	0.0662507		0.776323	-0.365125	0.445661	-0.776226
331	337		855.461	6	10.40-10.50	0.0914614	0.328861	0.44175	0.540104	0.569294		0.0989928	0.355366	0.444467	0.529111	0.529933	331	337	-0.00753134	-0.0265052	-0.00271667	0.0109925	0.0393609		0.00272005		331	337	0.0195898	0.0145015	0.0210794	0.0246199	0.0196226	0.00503905	0.00696318	0.0395025	0.0141403	0.0154015		-0.0451881	-0.159031	-0.0163	0.0659552	0.236166		-0.644897	-2.85383	-0.10509	0.670606
341	358		2119.22	17	8.24-8.77	0.0314899	0.0977486	0.169611	0.275417	0.277868		0.0428148	0.121529	0.199202	0.2614	0.244544	341	358	-0.0113249	-0.0237809	-0.0295912	0.0140171	0.0333241		-0.00347115		341	358	0.00465083	0.00565013	0.0194493	0.0126183	0.00129113	0.00613205	0.012536	0.00480623	0.00567533	0.042407		-0.192524	-0.404275	-0.503051	0.238291	0.56651		-2.54869	-2.99551	-2.55829	1.75474
379	386		821.444	7	11.53-11.57	-0.0306226	-0.00971812	-0.0104994	0.0141009	0.145823		0.0192292	-0.0189156	-0.00311151	0.0426501	0.145112	379	386	-0.0498518	0.00919744	-0.00738785	-0.0285493	0.000710235		-0.0151762		379	386	0.0130559	0.012913	0.00757186	0.0175028	0.00598486	0.00202644	0.00501514	0.00383966	0.00333305	0.0137889		-0.348963	0.0643821	-0.0517149	-0.199845	0.00497164		-6.53532	1.14999	-1.50724	-2.77532
386	395		1198.61	9	8.67-8.73	0.352321	0.445728	0.513985	0.571805	0.578857		0.346011	0.458887	0.50758	0.566428	0.553722	386	395	0.00630978	-0.0131587	0.00640564	0.00537695	0.0251353		0.0060138		386	395	0.0175519	0.0127322	0.00834295	0.0174428	0.0110498	0.0154562	0.00611111	0.00950464	0.0173949	0.0157562		0.0567881	-0.118428	0.0576507	0.0483925	0.226218		0.4673	-1.61381	0.877284	0.378061
389	397		1040.54	8	10.30-10.33	0.0781983	0.0914412	0.10584	0.21558	0.317912		0.0853451	0.0925733	0.124527	0.213932	0.346339	389	397	-0.00714683	-0.00113209	-0.0186875	0.00164851	-0.0284265		-0.0107489		389	397	0.0120321	0.0103696	0.0120323	0.00803041	0.0148862	0.00637015	0.00911119	0.0126076	0.0143922	0.0151479		-0.0571746	-0.00905672	-0.1495	0.0131881	-0.227412		-0.909238	-0.142051	-1.85724	0.173248
401	409		1045.69	7	10.16-10.26	0.02019	0.0268917	0.0231989	0.033929	0.106401		0.0211586	0.0249977	0.0211672	0.0473228	0.103931	401	409	-0.000968657	0.00189403	0.00203177	-0.0133938	0.00246951		-0.00159343		401	409	0.00974542	0.0060629	0.0106691	0.00464904	0.0102977	0.00993923	0.0097936	0.0151853	0.00114563	0.00837825		-0.0067806	0.0132582	0.0142224	-0.0937567	0.0172866		-0.12053	0.28481	0.189622	-4.84507
401	411		1231.79	9	10.51-10.60	0.0851688	0.186166	0.205732	0.21848	0.264376		0.0734504	0.193811	0.19782	0.217331	0.260618	401	411	0.0117184	-0.00764511	0.00791244	0.00114909	0.00375854		0.00337867		401	411	0.0170909	0.0157118	0.0108075	0.0109337	0.018375	0.0147131	0.0117512	0.011895	0.00845108	0.0166582		0.105466	-0.068806	0.0712119	0.0103418	0.0338269		0.90002	-0.674903	0.852736	0.144024
402	411		1118.7	8	9.58-9.65	0.116714	0.21842	0.232932	0.234391	0.288943		0.117155	0.223414	0.231932	0.228824	0.277136	402	411	-0.000440672	-0.00499384	0.00100019	0.00556716	0.0118076		0.0025881		402	411	0.0177653	0.0125535	0.013155	0.0257593	0.0171203	0.011939	0.0160688	0.0106884	0.00516194	0.00495951		-0.00352537	-0.0399507	0.00800149	0.0445373	0.0944612		-0.0356594	-0.424183	0.102206	0.367038
404	416		1475.86	11	11.55-11.72	0.00238304	0.00732877	0.018514	0.0594237	0.149492		-0.00712877	0.0118974	0.0153706	0.068397	0.153313	404	416	0.0095118	-0.00456866	0.00314342	-0.00897327	-0.00382117		-0.000941574		404	416	0.0169281	0.0148459	0.0147178	0.00942782	0.0202361	0.0056384	0.0124616	0.0108529	0.0152284	0.0162682		0.10463	-0.0502552	0.0345776	-0.098706	-0.0420328		0.923358	-0.408257	0.297736	-0.867767
423	435		1497.79	11	7.84-7.91	0.0798582	0.105911	0.121039	0.146479	0.196781		0.0823114	0.0890406	0.131792	0.166046	0.181217	423	435	-0.00245319	0.0168706	-0.0107522	-0.0195666	0.0155642		-6.74627e-05		423	435	0.0187692	0.0165309	0.00446472	0.0143701	0.011238	0.00375658	0.0169725	0.00871275	0.02683	0.0156974		-0.0269851	0.185576	-0.118275	-0.215233	0.171206		-0.221982	1.23333	-1.90227	-1.1135
426	435		1100.58	8	6.24-6.27	0.105084	0.134989	0.180414	0.220024	0.246491		0.10075	0.155484	0.187441	0.205147	0.24737	426	435	0.00433396	-0.020495	-0.00702649	0.0148767	-0.000878358		-0.00183784		426	435	0.00332929	0.013386	0.00608321	0.0189937	0.00511138	0.00330205	0.00333022	0.00320466	0.00276959	0.00966418		0.0346716	-0.16396	-0.0562119	0.119013	-0.00702687		1.60087	-2.57345	-1.77004	1.34242
426	437		1300.66	10	6.33-6.37	0.0749691	0.105145	0.147416	0.170759	0.217527		0.074111	0.102597	0.147174	0.157532	0.208272	426	437	0.00085806	0.00254866	0.000241493	0.0132278	0.00925537		0.00522627		426	437	0.00978045	0.0124721	0.011326	0.019587	0.02039	0.00980851	0.0157478	0.0113512	0.0102316	0.0184443		0.0085806	0.0254866	0.00241493	0.132278	0.0925537		0.107295	0.219749	0.026085	1.03678
438	447		1127.75	9	9.96-10.07	-9.46932e-05	0.00326915	0.0113038	0.0894299	0.156627		0.00611294	0.0125163	0.0236033	0.0945327	0.149185	438	447	-0.00620763	-0.0092471	-0.0122995	-0.00510282	0.00744196		-0.00508302		438	447	0.0087932	0.00674411	0.0121345	0.00934229	0.0078398	0.00833101	0.00782007	0.00972172	0.0065539	0.00815423		-0.0558687	-0.0832239	-0.110696	-0.0459254	0.0669776		-0.887631	-1.551	-1.37012	-0.774483
441	447		757.518	6	9.79-9.87	0.0225015	0.00452289	0.0853585	0.157729	0.238422		0.0406192	0.0347689	0.0674162	0.155708	0.239647	441	447	-0.0181177	-0.030246	0.0179423	0.0020204	-0.00122463		-0.00592512		441	447	0.0188794	0.0189993	0.0171858	0.00989652	0.00598756	0.0125958	0.0187614	0.0135117	0.0169808	0.00853905		-0.108706	-0.181476	0.107654	0.0121224	-0.00734776		-1.38269	-1.96198	1.42155	0.178049
447	464		2188.2	15	11.71-11.79	0.149996	0.218666	0.301617	0.407019	0.505328		0.141149	0.222625	0.292309	0.399639	0.478558	447	464	0.00884667	-0.0039591	0.00930786	0.0073794	0.0267694		0.00966884		447	464	0.00932448	0.00788836	0.0150313	0.00607353	0.01217	0.00512687	0.00984985	0.0152114	0.017019	0.029325		0.1327	-0.0593866	0.139618	0.110691	0.40154		1.43999	-0.543405	0.753869	0.707322
448	464		2075.12	14	11.64-11.71	0.120051	0.177087	0.257506	0.374522	0.486149		0.117351	0.185928	0.257789	0.361718	0.477423	448	464	0.00269968	-0.00884126	-0.000283475	0.0128045	0.00872591		0.00302107		448	464	0.00590192	0.012526	0.0146059	0.0171783	0.0137288	0.0182213	0.00734062	0.0199883	0.0203442	0.0119857		0.0377955	-0.123778	-0.00396866	0.179263	0.122163		0.244134	-1.05476	-0.0198333	0.832924
448	476		3264.69	25	12.22-12.27	0.114072	0.16155	0.209684	0.342553	0.495141		0.108057	0.160186	0.224084	0.344811	0.494827	448	476	0.00601493	0.0013634	-0.0144001	-0.00225803	0.000313552		-0.00179324		448	476	0.0079754	0.00734716	0.00717487	0.00946925	0.00912615	0.0152315	0.00573869	0.0115446	0.00269069	0.00350394		0.150373	0.0340851	-0.360001	-0.0564507	0.00783881		0.605946	0.253304	-1.83495	-0.397296
463	470		833.524	6	10.54-10.61	0.0681522	0.0917488	0.0882147	0.146533	0.271543		0.0721766	0.0895291	0.0910423	0.149704	0.273967	463	470	-0.00402438	0.00221965	-0.00282761	-0.00317114	-0.00242413		-0.00204552		463	470	0.0139861	0.0135577	0.0142699	0.0117555	0.019698	0.0164925	0.015795	0.016751	0.0174689	0.0213786		-0.0241463	0.0133179	-0.0169657	-0.0190269	-0.0145448		-0.322341	0.184694	-0.222565	-0.260856
474	490		1817.02	16	7.61-7.69	0.0823928	0.11335	0.115126	0.149929	0.184407		0.0881229	0.121689	0.131897	0.150996	0.191158	474	490	-0.00573013	-0.00833843	-0.0167701	-0.00106707	-0.00675075		-0.00773131		474	490	0.00967668	0.0101348	0.0105813	0.0113568	0.00844412	0.0152409	0.00836278	0.0139736	0.012737	0.00958563		-0.0916821	-0.133415	-0.268322	-0.0170731	-0.108012		-0.549754	-1.09916	-1.65718	-0.108306
477	485		1048.58	8	8.32-8.38	0.0280981	0.0237785	0.0330979	0.0448485	0.0444364		0.0159136	0.0287845	0.0373731	0.048183	0.0464002	477	485	0.0121845	-0.00500597	-0.00427519	-0.00333451	-0.00196381		-0.000478993		477	485	0.0148871	0.00923321	0.0119134	0.00798619	0.0102882	0.0097153	0.00852015	0.0114069	0.0112146	0.00854123		0.0974761	-0.0400478	-0.0342015	-0.0266761	-0.0157104		1.18718	-0.690134	-0.448945	-0.419504
490	496		807.436	6	9.85-9.93	-0.0116413	-0.0102512	0.00364328	0.00780796	0.0189433		-0.00421244	0.00467687	0.0125602	-0.000609204	0.0474903	490	496	-0.00742886	-0.0149281	-0.00891692	0.00841716	-0.028547		-0.0102807		490	496	0.0259316	0.0213659	0.0209102	0.0172699	0.0242072	0.0192749	0.0187863	0.0198609	0.017454	0.0178935		-0.0445731	-0.0895687	-0.0535015	0.050503	-0.171282		-0.398235	-0.908817	-0.535542	0.593755
500	506		828.494	6	9.63-9.73	0.0225445	0.0314012	0.0525555	0.151961	0.293669		0.00780547	0.0350308	0.0624177	0.153304	0.28143	500	506	0.0147391	-0.0036296	-0.00986219	-0.00134254	0.0122388		0.00242871		500	506	0.00951915	0.00427736	0.0121624	0.0172301	0.00846095	0.0146838	0.00206741	0.00743806	0.00702512	0.00597537		0.0884343	-0.0217776	-0.0591731	-0.00805522	0.0734328		1.45884	-1.32329	-1.19817	-0.12497
508	515		960.354	6	5.02-5.03	0.41375	0.423356	0.420159	0.420544	0.428604		0.387945	0.421696	0.415161	0.414165	0.418433	508	515	0.0258052	0.00165995	0.00499776	0.00637861	0.0101709		0.00980249		508	515	0.00765199	0.0205776	0.00907662	0.00658582	0.0102219	0.0178642	0.00993234	0.00204701	0.00595075	0.00290274		0.154831	0.0099597	0.0299866	0.0382716	0.0610254		2.29988	0.12583	0.930335	1.2447
516	530		1716.77	13	9.07-9.11	0.291252	0.385048	0.431473	0.478238	0.488232		0.30567	0.398525	0.449072	0.48758	0.475246	516	530	-0.0144183	-0.013477	-0.0175994	-0.00934248	0.0129854		-0.00837036		516	530	0.0217975	0.00453571	0.0075116	0.0102358	0.00488014	0.0205851	0.00689518	0.00173743	0.00317256	0.00152181		-0.187437	-0.175201	-0.228793	-0.121452	0.16881		-0.832959	-2.82833	-3.95376	-1.51002
518	530		1488.66	11	8.56-8.61	0.328943	0.414709	0.468518	0.513043	0.526239		0.332395	0.420846	0.474236	0.524489	0.525348	518	530	-0.00345265	-0.00613786	-0.00571805	-0.0114464	0.000891316		-0.00517273		518	530	0.0073209	0.0207984	0.026805	0.00974708	0.00526811	0.00989796	0.017791	0.00953026	0.0065194	0.0254384		-0.0379791	-0.0675164	-0.0628985	-0.12591	0.00980448		-0.48575	-0.388427	-0.348132	-1.6907
519	526		901.416	6	5.84-5.88	0.418213	0.431396	0.454993	0.443912	0.413261		0.449195	0.433363	0.425668	0.419183	0.445237	519	526	-0.0309816	-0.00196692	0.0293249	0.0247291	-0.0319759		-0.00217408		519	526	0.0255682	0.0156943	0.0225622	0.0178545	0.0403366	0.0430619	0.0131913	0.0418535	0.0198246	0.0174331		-0.18589	-0.0118015	0.175949	0.148375	-0.191855		-1.07151	-0.166171	1.06824	1.60543
531	544		1623.89	13	9.12-9.19	0.0209772	0.0564073	0.121029	0.286315	0.402544		0.0276964	0.0435162	0.105484	0.287627	0.402065	531	544	-0.00671929	0.0128912	0.0155456	-0.00131183	0.000478645		0.00417685		531	544	0.00516028	0.00719874	0.00792216	0.0105163	0.00539185	0.00615924	0.0126527	0.0249073	0.0055845	0.00693318		-0.0873507	0.167585	0.202093	-0.0170537	0.00622239		-1.44839	1.53382	1.03018	-0.190823
538	544		815.499	6	8.75-8.81	0.0301303	0.0697311	0.165817	0.412647	0.511894		0.0356796	0.096205	0.177432	0.399478	0.485789	538	544	-0.00554925	-0.0264739	-0.0116149	0.0131694	0.0261052		-0.000872687		538	544	0.00565597	0.0141134	0.00509677	0.00221493	0.0425794	0.00296468	0.00682662	0.00607711	0.0168075	0.0114097		-0.0332955	-0.158843	-0.0696896	0.0790164	0.156631		-1.50513	-2.92479	-2.53643	1.34551
540	563		2698.48	22	8.20-8.66	0.131355	0.159761	0.183154	0.314765	0.463273		0.126782	0.129705	0.21016	0.325824	0.48137	540	563	0.004573	0.030056	-0.0270069	-0.0110588	-0.0180974		-0.00430681		540	563	0.0181611	0.00891893	0.0416913	0.0139065	0.0127929	0.00794986	0.0215438	0.0222515	0.0140531	0.019449		0.100606	0.661231	-0.594152	-0.243293	-0.398142		0.399531	2.23264	-0.989835	-0.968823
545	556		1356.74	10	10.42-10.46	0.189001	0.18918	0.203821	0.254391	0.334543		0.193316	0.20655	0.217278	0.263368	0.330133	545	556	-0.00431478	-0.0173704	-0.0134569	-0.00897657	0.00440925		-0.00794188		545	556	0.00507746	0.00495896	0.0090306	0.00581552	0.00393836	0.00893388	0.00275806	0.00847507	0.00959612	0.0104534		-0.0431478	-0.173704	-0.134569	-0.0897657	0.0440925		-0.727273	-5.3022	-1.88201	-1.38563
556	563		933.482	7	8.82-8.89	0.282352	0.456232	0.497603	0.522164	0.629716		0.308909	0.458813	0.495193	0.533102	0.634521	556	563	-0.0265574	-0.00258188	0.00241045	-0.0109382	-0.00480448		-0.00849429		556	563	0.0111821	0.00482857	0.0125209	0.0105328	0.00631471	0.00859531	0.0124401	0.00862921	0.00130469	0.0103448		-0.185901	-0.0180731	0.0168731	-0.0765672	-0.0336313		-3.26143	-0.335119	0.274556	-1.78506
568	575		935.469	7	4.77-4.79	0.271642	0.343396	0.416367	0.574203	0.565049		0.275869	0.343166	0.435067	0.565862	0.554808	568	575	-0.00422729	0.000229638	-0.0186994	0.00834009	0.0102418		-0.000823028		568	575	0.0138313	0.00311834	0.0153309	0.0172288	0.0101725	0.025555	0.0255237	0.00793774	0.0141887	0.031174		-0.029591	0.00160746	-0.130896	0.0583806	0.0716925		-0.251975	0.0154683	-1.87606	0.647219
568	577		1147.62	9	7.52-7.60	0.138312	0.185823	0.254227	0.414832	0.520469		0.14759	0.195561	0.265197	0.428514	0.536143	568	577	-0.00927778	-0.00973814	-0.0109695	-0.0136823	-0.0156746		-0.0118685		568	577	0.0160945	0.00560398	0.00724345	0.00674677	0.00790962	0.0122454	0.0066607	0.0144706	0.00677861	0.00901509		-0.0835	-0.0876433	-0.0987254	-0.12314	-0.141072		-0.794605	-1.93771	-1.1741	-2.47789
579	585		848.433	6	10.85-10.93	0.00650771	0.0215898	0.0645684	0.188826	0.325041		-0.000478856	0.014602	0.048948	0.191287	0.321897	579	585	0.00698657	0.00698781	0.0156204	-0.00246095	0.00314403		0.00605557		579	585	0.00710821	0.0014903	0.0164343	0.0071806	0.0200144	0.0284784	0.0172595	0.0197266	0.0206644	0.0117803		0.0419194	0.0419269	0.0937224	-0.0147657	0.0188642		0.412274	0.698653	1.05374	-0.194843
583	599		2096	16	7.94-7.98	0.397909	0.467599	0.508915	0.544427	0.624479		0.404317	0.481904	0.53364	0.561376	0.626029	583	599	-0.00640858	-0.0143049	-0.0247253	-0.0169493	-0.00155028		-0.0127876		583	599	0.0141396	0.0161112	0.0113905	0.0156002	0.0129914	0.00829021	0.023048	0.0248777	0.0157151	0.0253854		-0.102537	-0.228878	-0.395604	-0.271188	-0.0248045		-0.677213	-0.88108	-1.56518	-1.32577
585	597		1585.79	12	9.61-9.71	0.11622	0.134222	0.163142	0.189881	0.206853		0.104466	0.143127	0.16208	0.192713	0.20776	585	597	0.0117542	-0.0089051	0.00106169	-0.00283246	-0.000907711		3.41294e-05		585	597	0.0096806	0.0143101	0.00929876	0.0122118	0.00942077	0.0192517	0.00794179	0.00832214	0.0110159	0.0172371		0.141051	-0.106861	0.0127403	-0.0339896	-0.0108925		0.94479	-0.942439	0.14736	-0.298303
598	606		878.462	8	10.40-10.43	0.0294388	0.0888724	0.15052	0.281597	0.469223		0.0281151	0.0901231	0.15264	0.290277	0.465134	598	606	0.00132369	-0.00125075	-0.00212071	-0.00867948	0.00408843		-0.00132776		598	606	0.0036444	0.000924254	0.00355858	0.00298881	0.00147687	0.00512481	0.000984701	0.00236642	0.00516679	0.00486231		0.0105896	-0.010006	-0.0169657	-0.0694358	0.0327075		0.364586	-1.6041	-0.859509	-2.51857
607	616		1139.57	9	12.35-12.39	0.294227	0.411847	0.446005	0.558018	0.617997		0.290468	0.413609	0.456724	0.5523	0.612415	607	616	0.00375954	-0.00176169	-0.0107194	0.00571741	0.00558209		0.000515589		607	616	0.0178531	0.00561658	0.00909652	0.00934129	0.00760365	0.0227766	0.00143267	0.00560033	0.00679602	0.00982769		0.0338358	-0.0158552	-0.0964746	0.0514567	0.0502388		0.225009	-0.526417	-1.73808	0.857251
607	626		2219.17	18	10.31-10.61	0.0636474	0.0957547	0.107058	0.154342	0.257093		0.0613561	0.0937163	0.125278	0.170682	0.249152	607	626	0.00229129	0.00203839	-0.0182207	-0.0163393	0.0079408		-0.00445791		607	626	0.0284431	0.021491	0.0180998	0.0159546	0.0183125	0.015403	0.0152631	0.0192355	0.0145818	0.0252657		0.0412433	0.036691	-0.327973	-0.294107	0.142934		0.122693	0.13394	-1.19487	-1.30934
617	629		1427.74	11	9.16-9.20	0.0136769	0.0576939	0.130626	0.225927	0.339129		0.0404396	0.0650897	0.131008	0.22976	0.343755	617	629	-0.0267627	-0.00739579	-0.000381954	-0.00383338	-0.00462537		-0.00859984		617	629	0.0114569	0.00992402	0.00800706	0.00945102	0.00474708	0.00230868	0.00297191	0.0074844	0.00664505	0.00444858		-0.29439	-0.0813537	-0.00420149	-0.0421672	-0.0508791		-3.96626	-1.23654	-0.0603597	-0.574694
630	636		789.523	6	10.32-10.40	0.0146868	0.0138129	0.0156562	0.0259958	0.0193878		0.00213706	0.0192699	0.021647	0.0268199	0.0161751	630	636	0.0125498	-0.00545697	-0.0059908	-0.000824129	0.00321269		0.000698109		630	636	0.0106891	0.0103878	0.0108224	0.00767562	0.00798284	0.00994627	0.00789552	0.00887488	0.012354	0.00911567		0.0752985	-0.0327418	-0.0359448	-0.00494478	0.0192761		1.48874	-0.724392	-0.741382	-0.098144
632	638		777.487	6	10.91-10.98	0.039659	0.0488077	0.0407525	0.0440731	0.0515808		0.037909	0.042441	0.0480726	0.0429634	0.0427619	632	638	0.00175	0.00636667	-0.00732015	0.0011097	0.00881891		0.00214502		632	638	0.00816269	0.00611318	0.00545224	0.00701294	0.00795697	0.00836816	0.000621642	0.00712786	0.00633532	0.00785473		0.0105	0.0382	-0.0439209	0.00665821	0.0529134		0.25929	1.79462	-1.41284	0.203375
643	656		1674.87	12	10.98-11.09	0.116641	0.199204	0.278598	0.489806	0.618016		0.1052	0.192751	0.272832	0.482927	0.612695	643	656	0.0114407	0.00645336	0.00576629	0.00687948	0.00532164		0.00717229		643	656	0.0104837	0.0140198	0.0113215	0.0126447	0.0115909	0.0165764	0.0100123	0.00903781	0.0204367	0.0106425		0.137288	0.0774403	0.0691955	0.0825537	0.0638597		1.01032	0.648805	0.689436	0.495819
645	656		1443.8	10	10.66-10.78	0.115817	0.197566	0.258539	0.487507	0.603592		0.12132	0.199433	0.266865	0.49064	0.598333	645	656	-0.00550328	-0.00186746	-0.00832612	-0.00313313	0.00525881		-0.00271424		645	656	0.0113304	0.0090603	0.00713284	0.00433791	0.00722836	0.0211776	0.00855388	0.0050209	0.00333522	0.00696045		-0.0550328	-0.0186746	-0.0832612	-0.0313313	0.0525881		-0.396866	-0.259589	-1.65329	-0.991757
657	669		1397.69	10	11.93-11.98	0.0254584	0.0364724	0.0735194	0.127766	0.127634		0.0189387	0.0361918	0.0829431	0.121027	0.139499	657	669	0.0065197	0.000280597	-0.00942373	0.00673925	-0.0118651		-0.00154985		657	669	0.0355497	0.00561761	0.0101193	0.00627657	0.00445463	0.00439045	0.00514224	0.00990582	0.0227815	0.0102485		0.065197	0.00280597	-0.0942373	0.0673925	-0.118651		0.315257	0.0638159	-1.15266	0.493973
659	677		2142.1	16	7.94-8.03	0.0824435	0.133495	0.11208	0.136426	0.216273		0.0875614	0.127551	0.117559	0.159918	0.19315	659	677	-0.00511791	0.00594412	-0.00547929	-0.0234924	0.0231236		-0.00100438		659	677	0.025613	0.0133848	0.00712761	0.00635065	0.0308029	0.00762547	0.0389334	0.0176337	0.00656688	0.0125415		-0.0818866	0.095106	-0.0876687	-0.375879	0.369978		-0.331705	0.250074	-0.498978	-4.45413
660	669		1124.59	7	11.37-11.48	0.0386	0.0666588	0.0933565	0.164931	0.194375		0.0442136	0.0561162	0.108008	0.169045	0.186261	660	669	-0.00561365	0.0105426	-0.0146512	-0.00411471	0.00811407		-0.00114456		660	669	0.00251919	0.00707036	0.00232836	0.0105725	0.00400938	0.00446695	0.0447062	0.00931535	0.00650725	0.00775842		-0.0392955	0.0737985	-0.102558	-0.028803	0.0567985		-1.89596	0.403439	-2.64286	-0.574074
677	686		1103.66	9	11.97-12.05	0.0289556	0.0267706	0.0275056	0.0488133	0.0412924		0.0292425	0.0300075	0.0315048	0.0360158	0.0508677	677	686	-0.000286899	-0.00323682	-0.00399917	0.0127975	-0.00957529		-0.000860133		677	686	0.00574163	0.00954594	0.00719088	0.0085806	0.00767877	0.00565771	0.00656633	0.0106333	0.0102196	0.0138879		-0.00258209	-0.0291313	-0.0359925	0.115178	-0.0861776		-0.0616472	-0.483877	-0.539614	1.6611
679	691		1372.78	12	9.25-9.32	0.461175	0.519305	0.505363	0.509602	0.511716		0.47166	0.512786	0.497961	0.506188	0.516903	679	691	-0.0104848	0.00651903	0.00740199	0.00341393	-0.00518669		0.000332687		679	691	0.00503134	0.00837326	0.0221934	0.00551791	0.00790871	0.0119897	0.0031954	0.0223592	0.0096194	0.0156399		-0.125818	0.0782284	0.0888239	0.0409672	-0.0622403		-1.39667	1.25987	0.406956	0.533209
680	689		1045.6	9	8.75-8.81	0.0195778	0.0425967	0.115314	0.272921	0.33872		0.0171549	0.0487028	0.113632	0.281722	0.34183	680	689	0.00242289	-0.00610614	0.00168242	-0.00880149	-0.00311012		-0.00278249		680	689	0.00496269	0.00544096	0.00561675	0.00617313	0.00699187	0.00539204	0.00756534	0.00525124	0.00876633	0.00581012		0.021806	-0.0549552	0.0151418	-0.0792134	-0.027991		0.57266	-1.13494	0.378979	-1.42184
696	705		1240.59	7	11.89-11.91	0.0213635	0.0182365	0.0505305	0.198568	0.354956		0.0156727	0.018116	0.0737026	0.202826	0.351742	696	705	0.00569083	0.000120469	-0.0231721	-0.00425864	0.00321429		-0.00368102		696	705	0.0213369	0.0177267	0.0202245	0.0264098	0.0377	0.0156222	0.0163399	0.0130147	0.0259433	0.0379134		0.0398358	0.000843284	-0.162204	-0.0298104	0.0225		0.372735	0.00865494	-1.66881	-0.199245
706	716		1321.86	9	10.63-10.72	0.310813	0.444159	0.630812	0.795377	0.83899		0.335088	0.458461	0.629593	0.80122	0.831475	706	716	-0.0242748	-0.014302	0.00121907	-0.00584262	0.00751459		-0.00713715		706	716	0.0142738	0.0176769	0.0111662	0.0102521	0.0156577	0.0289748	0.0133206	0.0167449	0.0150846	0.011606		-0.218473	-0.128718	0.0109716	-0.0525836	0.0676313		-1.30171	-1.11918	0.104911	-0.554849
711	717		870.577	6	8.29-8.39	0.284213	0.392457	0.525413	0.65562	0.696398		0.286045	0.400103	0.518969	0.658088	0.688141	711	717	-0.00183159	-0.00764627	0.00644403	-0.00246791	0.00825721		0.000551095		711	717	0.0146221	0.0137405	0.0252532	0.0217766	0.021252	0.0276774	0.014091	0.0177204	0.0242704	0.024204		-0.0109896	-0.0458776	0.0386642	-0.0148075	0.0495433		-0.101347	-0.672903	0.361792	-0.131089
722	737		1882.97	14	9.53-9.63	0.218187	0.349862	0.386145	0.429877	0.456989		0.236814	0.376338	0.401382	0.4447	0.478562	722	737	-0.0186273	-0.0264758	-0.0152372	-0.014823	-0.0215728		-0.0193472		722	737	0.023805	0.0182232	0.0166919	0.0189385	0.0235793	0.0320912	0.00945959	0.0188192	0.0195506	0.0259515		-0.260782	-0.370661	-0.213321	-0.207522	-0.302019		-0.807464	-2.23344	-1.04915	-0.943234
728	734		897.483	6	6.49-6.52	0.215375	0.308369	0.336996	0.434539	0.469659		0.191513	0.295072	0.330297	0.430329	0.464456	728	734	0.0238622	0.013297	0.00669826	0.0042097	0.00520274		0.010654		728	734	0.0274657	0.0337756	0.0164764	0.0115856	0.00406692	0.0130236	0.0256114	0.0172881	0.0113833	0.0102585		0.143173	0.0797821	0.0401896	0.0252582	0.0312164		1.35969	0.543341	0.485795	0.448921
729	746		2219.17	17	12.54-12.57	0.147427	0.21824	0.25899	0.366158	0.460127		0.125127	0.222786	0.272954	0.362094	0.463063	729	746	0.0222995	-0.00454574	-0.0139631	0.00406383	-0.00293661		0.000983565		729	746	0.016991	0.0174971	0.0213119	0.0149245	0.0305629	0.0311067	0.0175184	0.0164047	0.0196815	0.0232121		0.379091	-0.0772776	-0.237373	0.0690851	-0.0499224		1.0897	-0.317994	-0.899251	0.284967
731	737		852.457	6	5.51-5.54	0.222605	0.259637	0.269897	0.348174	0.417767		0.234931	0.251758	0.290074	0.331414	0.461248	731	737	-0.0123254	0.0078796	-0.0201764	0.01676	-0.0434811		-0.0102687		731	737	0.0234545	0.0247428	0.0248562	0.0184276	0.030855	0.0296082	0.0305299	0.0379326	0.0338704	0.0346769		-0.0739522	0.0472776	-0.121058	0.10056	-0.260887		-0.565178	0.347298	-0.770578	0.752852
731	741		1266.71	10	8.74-8.81	0.235409	0.357949	0.386154	0.491871	0.57513		0.247742	0.363077	0.39434	0.494546	0.573784	731	741	-0.0123325	-0.00512806	-0.00818642	-0.00267537	0.00134687		-0.0053951		731	741	0.0272978	0.0149945	0.0152512	0.0191413	0.0137363	0.0251103	0.0141749	0.0139755	0.01641	0.0137354		-0.123325	-0.0512806	-0.0818642	-0.0267537	0.0134687		-0.575907	-0.430457	-0.685451	-0.183792
731	751		2628.47	20	8.77-8.85	0.285641	0.356077	0.378126	0.396134	0.409872		0.299418	0.366255	0.389904	0.399406	0.418528	731	751	-0.0137765	-0.010178	-0.0117784	-0.00327187	-0.0086556		-0.00953206		731	751	0.0153568	0.00587172	0.00615284	0.0152609	0.0265941	0.00614045	0.0116275	0.00641582	0.0257278	0.0106881		-0.27553	-0.20356	-0.235567	-0.0654373	-0.173112		-1.44275	-1.35336	-2.29497	-0.189448
734	741		919.521	7	7.19-7.26	0.316661	0.468098	0.477647	0.561839	0.588136		0.308606	0.468192	0.478497	0.550962	0.600139	734	741	0.00805586	-9.36034e-05	-0.00084968	0.010877	-0.0120028		0.00119736		734	741	0.0155414	0.0122254	0.0136983	0.00827015	0.0113292	0.0333281	0.0140525	0.00990085	0.0068081	0.00760554		0.056391	-0.000655224	-0.00594776	0.0761388	-0.0840194		0.379434	-0.00870424	-0.087073	1.75874
748	770		2530.32	17	8.86-8.94	0.241015	0.354619	0.429485	0.542549	0.576804		0.23544	0.36362	0.441202	0.551762	0.557567	748	770	0.00557524	-0.00900149	-0.0117176	-0.00921308	0.0192374		-0.00102392		748	770	0.0056489	0.00572888	0.0165709	0.00761089	0.0210619	0.0227486	0.00712915	0.00495953	0.0060324	0.0450951		0.0947791	-0.153025	-0.1992	-0.156622	0.327036		0.41198	-1.70473	-1.17334	-1.64314
771	778		886.572	7	6.40-6.46	0.0462475	0.140521	0.238399	0.40231	0.550029		0.0534925	0.144196	0.251552	0.393242	0.554512	771	778	-0.00724499	-0.00367463	-0.0131533	0.00906844	-0.00448358		-0.00389761		771	778	0.00866652	0.0171991	0.0157215	0.0217281	0.0124132	0.0102989	0.0141141	0.0125237	0.00930149	0.00694968		-0.0507149	-0.0257224	-0.0920731	0.0634791	-0.0313851		-0.932282	-0.286064	-1.13344	0.664555
771	787		1991.04	16	8.51-8.59	0.0349121	0.116526	0.181278	0.297199	0.449816		0.0473498	0.112702	0.182532	0.30407	0.449079	771	787	-0.0124377	0.00382397	-0.00125448	-0.00687099	0.000737407		-0.00320035		771	787	0.0207006	0.0131992	0.00913554	0.0117216	0.0228802	0.0107178	0.0105725	0.011216	0.0168349	0.0241816		-0.199003	0.0611836	-0.0200716	-0.109936	0.0117985		-0.924159	0.391648	-0.150204	-0.580145
775	788		1621.76	13	12.77-12.80	0.0895913	0.142542	0.165889	0.22921	0.40386		0.0917216	0.159151	0.18157	0.245785	0.402806	775	788	-0.00213031	-0.0166085	-0.0156811	-0.0165755	0.00105431		-0.00998822		775	788	0.00351975	0.00345155	0.00634305	0.00425821	0.00765121	0.00592181	0.00285672	0.0077318	0.00593582	0.0049558		-0.027694	-0.21591	-0.203854	-0.215482	0.013706		-0.535618	-6.42057	-2.71583	-3.93002
788	794		837.454	6	11.87-11.93	0.0323751	0.128918	0.198394	0.310823	0.353692		0.0516945	0.141895	0.201728	0.307111	0.353684	788	794	-0.0193194	-0.0129764	-0.00333333	0.00371194	8.45771e-06		-0.00638174		788	794	0.0267229	0.0186724	0.0158318	0.013091	0.0183127	0.00638035	0.0079995	0.0157552	0.0113861	0.0194022		-0.115916	-0.0778582	-0.02	0.0222716	5.07463e-05		-1.21796	-1.10643	-0.25849	0.370566
798	816		2120.08	18	12.19-12.27	0.0424737	0.0887477	0.11967	0.232574	0.382389		0.0421656	0.0725833	0.110928	0.217232	0.360145	798	816	0.000308126	0.0161644	0.00874179	0.0153419	0.0222437		0.01256		798	816	0.00662239	0.00426269	0.00269478	0.0023102	0.0116654	0.00549768	0.00788159	0.021192	0.00943267	0.00934751		0.00554627	0.29096	0.157352	0.276154	0.400387		0.0620065	3.12457	0.70877	2.73624
819	828		943.546	9	6.60-6.65	0.130726	0.187427	0.227886	0.280071	0.38655		0.128821	0.196533	0.218475	0.28228	0.389577	819	828	0.00190498	-0.00910564	0.00941061	-0.00220862	-0.00302637		-0.000605008		819	828	0.0110443	0.0164373	0.0168456	0.0198629	0.017294	0.0159483	0.0172584	0.0175337	0.0267161	0.0224393		0.0171448	-0.0819507	0.0846955	-0.0198776	-0.0272373		0.170086	-0.661733	0.670363	-0.11491
822	830		886.51	8	7.14-7.18	0.304204	0.502076	0.578198	0.748466	0.778421		0.312563	0.526251	0.588852	0.765941	0.749392	822	830	-0.0083584	-0.0241756	-0.0106545	-0.0174748	0.0290289		-0.00632687		822	830	0.0305916	0.0178084	0.0130588	0.0301649	0.0350556	0.0226392	0.0122269	0.0160388	0.0399041	0.0197164		-0.0668672	-0.193404	-0.0852358	-0.139799	0.232231		-0.380402	-1.93842	-0.892247	-0.605072
822	832		1100.61	10	7.85-7.89	0.282398	0.445306	0.513621	0.695925	0.748901		0.300952	0.456633	0.53121	0.717304	0.742852	822	832	-0.0185534	-0.0113269	-0.0175891	-0.021379	0.00604851		-0.01256		822	832	0.0128919	0.00569567	0.00995403	0.00571373	0.00911045	0.0235712	0.0096294	0.00347791	0.00842478	0.00823418		-0.185534	-0.113269	-0.175891	-0.21379	0.0604851		-1.19612	-1.75359	-2.88931	-3.63762
824	836		1399.83	12	11.49-11.54	0.0614009	0.0736243	0.103448	0.191535	0.290036		0.0594647	0.0734965	0.113747	0.192075	0.279709	824	836	0.00193619	0.000127736	-0.0102994	-0.000540174	0.010327		0.000310274		824	836	0.0142776	0.00807923	0.0173838	0.0172777	0.00668197	0.0142178	0.0138527	0.0163265	0.0195838	0.012259		0.0232343	0.00153284	-0.123593	-0.00648209	0.123924		0.166437	0.0137963	-0.748015	-0.0358251
825	848		2775.53	22	9.65-9.77	0.238933	0.315228	0.322397	0.341197	0.369367		0.256501	0.309318	0.331459	0.345623	0.3651	825	848	-0.0175687	0.00591052	-0.00906208	-0.00442632	0.0042671		-0.00417589		825	848	0.0137468	0.0110693	0.0132694	0.00578107	0.00654193	0.00889525	0.00616472	0.00680678	0.00672117	0.00732558		-0.38651	0.130031	-0.199366	-0.0973791	0.0938761		-1.85845	0.807987	-1.05248	-0.864782
859	881		2531.21	18	11.26-11.33	0.589291	0.618544	0.611483	0.626619	0.649206		0.583215	0.619123	0.620217	0.627365	0.641427	859	881	0.00607662	-0.000579104	-0.00873375	-0.000746683	0.00777819		0.000759055		859	881	0.0228747	0.0177148	0.0110702	0.00273441	0.0168535	0.0309483	0.0116204	0.0129444	0.0131596	0.003884		0.109379	-0.0104239	-0.157207	-0.0134403	0.140007		0.273488	-0.0473443	-0.888139	-0.0962221
864	882		1980.93	14	8.77-8.81	0.606628	0.63828	0.631148	0.650075	0.656264		0.627058	0.642735	0.651193	0.650681	0.661782	864	882	-0.0204302	-0.00445437	-0.0200451	-0.00060565	-0.00551716		-0.0102105		864	882	0.0183076	0.00385885	0.0238726	0.00699872	0.0035081	0.0247353	0.00146567	0.0159329	0.0156032	0.00685352		-0.286022	-0.0623612	-0.280631	-0.0084791	-0.0772403		-1.14989	-1.86907	-1.20967	-0.0613427
882	897		1642.84	13	5.67-5.69	0.610908	0.627948	0.621927	0.6479	0.626456		0.622625	0.63468	0.638135	0.635588	0.640227	882	897	-0.0117163	-0.00673249	-0.0162083	0.0123111	-0.0137703		-0.00722324		882	897	0.0115092	0.00720551	0.0212288	0.0153583	0.0215626	0.0174142	0.0074946	0.0084752	0.00730723	0.00655063		-0.152312	-0.0875224	-0.210707	0.160045	-0.179013		-0.972185	-1.12162	-1.22817	1.25373
882	904		2356.22	19	8.95-9.00	0.710229	0.714839	0.713051	0.719174	0.727493		0.69681	0.70006	0.715343	0.722517	0.717286	882	904	0.0134189	0.0147782	-0.00229152	-0.00334281	0.0102069		0.00655395		882	904	0.0189249	0.0253388	0.0391701	0.0179705	0.0298757	0.0271883	0.0410201	0.0324282	0.0258294	0.0200071		0.25496	0.280787	-0.0435388	-0.0635134	0.193931		0.701625	0.530884	-0.078051	-0.184007
885	897		1301.64	10	5.22-5.23	0.693286	0.685075	0.691428	0.716068	0.707318		0.715697	0.71309	0.732885	0.711544	0.714717	885	897	-0.0224109	-0.0280145	-0.0414567	0.00452448	-0.0073994		-0.0189514		885	897	0.0152318	0.00928657	0.00744597	0.0398412	0.0131954	0.00392507	0.00238045	0.0192273	0.00745507	0.02571		-0.224109	-0.280145	-0.414567	0.0452448	-0.073994		-2.46779	-5.06138	-3.48252	0.193341
898	924		2876.62	22	10.72-10.77	0.724845	0.767148	0.761853	0.789752	0.788081		0.721075	0.763597	0.774614	0.788279	0.79234	898	924	0.00376995	0.00355068	-0.0127612	0.00147246	-0.00425929		-0.00164548		898	924	0.0315651	0.00595448	0.0502043	0.00463372	0.0178381	0.0335924	0.0454199	0.0213152	0.00948433	0.0135563		0.0829388	0.0781149	-0.280746	0.032394	-0.0937045		0.141656	0.134253	-0.40525	0.241609
900	924		2660.52	20	10.10-10.16	0.732442	0.781156	0.78448	0.810929	0.816676		0.750472	0.791473	0.801815	0.810482	0.817164	900	924	-0.0180304	-0.0103163	-0.0173346	0.000446642	-0.000488582		-0.00914467		900	924	0.0117043	0.00410448	0.00833463	0.00352701	0.0109878	0.0146369	0.0033994	0.005975	0.00355015	0.00571739		-0.360609	-0.206327	-0.346693	0.00893284	-0.00977164		-1.66637	-3.35279	-2.92776	0.154587
909	924		1762.05	12	10.11-10.16	0.762578	0.795588	0.805265	0.816821	0.824518		0.787577	0.804079	0.813196	0.817943	0.829545	909	924	-0.0249989	-0.00849142	-0.0079301	-0.00112251	-0.00502687		-0.00951396		909	924	0.028518	0.0167611	0.0103908	0.024898	0.0218752	0.0105336	0.0133583	0.00885274	0.0198636	0.0191715		-0.299987	-0.101897	-0.0951612	-0.0134701	-0.0603224		-1.42426	-0.686208	-1.00621	-0.0610424
913	923		1222.75	8	11.96-12.13	0.137688	0.131251	0.162254	0.223468	0.246134		0.102209	0.0840168	0.0947871	0.146782	0.17416	913	923	0.0354791	0.0472338	0.0674668	0.0766864	0.0719737		0.0597679		913	923	0.00892407	0.0116761	0.00784739	0.0099722	0.0106694	0.000216045	0.00550299	0.0144297	0.00833638	0.0311082		0.283833	0.37787	0.539734	0.613491	0.57579		6.88404	6.33806	7.1143	10.2191
921	927		716.419	5	11.04-11.08	0.0203263	0.0163131	0.0157899	0.0142099	0.0351806		0.00823851	0.0222436	0.0340469	0.0418134	0.0545496	921	927	0.0120878	-0.00593045	-0.018257	-0.0276036	-0.019369		-0.0118144		921	927	0.0111919	0.00203463	0.0096794	0.0102242	0.0130349	0.00572179	0.00449642	0.000488657	0.00308358	0.00961224		0.0604388	-0.0296522	-0.0912851	-0.138018	-0.0968448		1.66564	-2.08129	-3.26279	-4.47706
925	933		968.494	7	9.90-9.93	0.669584	0.704538	0.712178	0.718968	0.723658		0.641206	0.703174	0.708847	0.735218	0.724666	925	933	0.028378	0.00136439	0.00333134	-0.0162499	-0.00100789		0.0031632		925	933	0.0107768	0.0146608	0.0237213	0.0153149	0.0077435	0.0145394	0.00760256	0.00804072	0.0169985	0.0105768		0.198646	0.00955075	0.0233194	-0.113749	-0.00705522		2.71591	0.143096	0.230369	-1.23014
927	934		922.488	6	9.10-9.13	0.618008	0.69772	0.68844	0.675199	0.693017		0.638226	0.676596	0.687455	0.682146	0.691082	927	934	-0.0202172	0.0211241	0.000984577	-0.00694677	0.00193458		-0.000624129		927	934	0.00954478	0.0438328	0.00360871	0.0115948	0.0122729	0.0120975	0.0111627	0.0107386	0.00745423	0.00708134		-0.121303	0.126745	0.00590746	-0.0416806	0.0116075		-2.27244	0.8089	0.150533	-0.872894
944	960		2098.12	16	5.48-5.59	0.103067	0.139821	0.166512	0.182629	0.204369		0.119267	0.146074	0.175325	0.186737	0.196546	944	960	-0.0162	-0.00625243	-0.00881343	-0.00410802	0.00782332		-0.00551011		944	960	0.0189529	0.00686325	0.0177821	0.0108238	0.0146576	0.0121546	0.0114934	0.0113787	0.00815233	0.0114092		-0.2592	-0.100039	-0.141015	-0.0657284	0.125173		-1.24622	-0.80898	-0.723094	-0.525097
945	955		1401.73	10	6.13-6.15	0.0564464	0.0886122	0.163853	0.401682	0.70074		0.0690485	0.111192	0.210879	0.456232	0.711167	945	955	-0.0126021	-0.0225801	-0.047026	-0.0545496	-0.0104272		-0.029437		945	955	0.0175394	0.0123097	0.0181606	0.020869	0.011616	0.0137318	0.0158828	0.0249416	0.0149545	0.012274		-0.126021	-0.225801	-0.47026	-0.545496	-0.104272		-0.979891	-1.94629	-2.64	-3.6801
945	957		1586.81	12	6.18-6.20	0.0574485	0.129857	0.24157	0.440201	0.6844		0.0674016	0.156494	0.27767	0.470099	0.695535	945	957	-0.00995311	-0.0266376	-0.0360995	-0.0298978	-0.0111346		-0.0227445		945	957	0.020021	0.0220636	0.0203062	0.0250159	0.0189748	0.0185571	0.019965	0.0194392	0.0218653	0.0194238		-0.119437	-0.319651	-0.433194	-0.358773	-0.133615		-0.631511	-1.55055	-2.22427	-1.55861
948	957		1217.61	9	4.77-4.78	0.10279	0.198751	0.316946	0.520946	0.669541		0.108367	0.22171	0.355857	0.543379	0.681756	948	957	-0.00557695	-0.0229595	-0.0389106	-0.0224332	-0.0122149		-0.020419		948	957	0.0185483	0.0179816	0.0200514	0.027299	0.0316096	0.0291068	0.0208398	0.0290086	0.0354801	0.0221484		-0.0501925	-0.206636	-0.350196	-0.201899	-0.109934		-0.27987	-1.44475	-1.91115	-0.867949
958	969		1449.68	11	7.32-7.36	0.272499	0.546848	0.738598	0.808332	0.813839		0.28503	0.548982	0.730008	0.806791	0.815814	958	969	-0.0125308	-0.00213365	0.00858982	0.00154098	-0.00197544		-0.00130182		958	969	0.0244202	0.00978616	0.0128007	0.0106414	0.0143684	0.0274904	0.00585251	0.00833826	0.00850841	0.00652836		-0.137839	-0.0234701	0.0944881	0.0169507	-0.0217299		-0.590256	-0.324099	0.973889	0.195898
968	974		846.399	5	8.81-8.85	0.0669961	0.108721	0.129673	0.276273	0.39611		0.0397069	0.103209	0.151786	0.319621	0.377221	968	974	0.0272893	0.00551224	-0.0221128	-0.0433478	0.018889		-0.00275403		968	974	0.0119791	0.0229367	0.0158278	0.0231869	0.00248448	0.00213134	0.00967582	0.0162161	0.00165164	0.00098597		0.136446	0.0275612	-0.110564	-0.216739	0.0944448		3.88473	0.383524	-1.69022	-3.22988
970	985		1845.02	10	9.52-9.65	0.268942	0.507987	0.591822	0.671705	0.684549		0.292768	0.52206	0.606749	0.67081	0.695011	970	985	-0.0238261	-0.014073	-0.0149272	0.000895075	-0.0104622		-0.0124787		970	985	0.0206836	0.00480612	0.016594	0.0196542	0.0115873	0.0188824	0.0130061	0.017506	0.0117761	0.0114684		-0.238261	-0.14073	-0.149272	0.00895075	-0.104622		-1.47353	-1.75794	-1.07187	0.0676636
989	1005		2027.05	16	5.49-5.58	0.13636	0.162937	0.19061	0.199735	0.211186		0.136268	0.168662	0.190223	0.204088	0.217816	989	1005	9.29104e-05	-0.00572584	0.000387127	-0.00435326	-0.00662966		-0.00324575		989	1005	0.0108465	0.00403871	0.00460951	0.00609841	0.011556	0.00213396	0.00369244	0.0116815	0.00686203	0.00451707		0.00148657	-0.0916134	0.00619403	-0.0696522	-0.106075		0.0145576	-1.81232	0.0533937	-0.821331
1008	1021		1555.72	13	10.65-10.72	0.0656752	0.13671	0.179399	0.241901	0.338399		0.0362514	0.138565	0.183826	0.255637	0.343028	1008	1021	0.0294238	-0.00185488	-0.0044271	-0.0137362	-0.00462847		0.000955431		1008	1021	0.00982411	0.0171333	0.0124057	0.0163768	0.0272386	0.0228889	0.0175458	0.03061	0.0118811	0.0333495		0.382509	-0.0241134	-0.0575522	-0.17857	-0.0601701		2.04606	-0.131006	-0.232163	-1.17591
1009	1027		2068.94	18	8.76-8.82	0.163164	0.21893	0.26177	0.309355	0.317607		0.175238	0.225414	0.265986	0.31692	0.338504	1009	1027	-0.0120741	-0.00648433	-0.00421567	-0.00756509	-0.0208965		-0.0102471		1009	1027	0.0127052	0.00471609	0.0133582	0.00121617	0.00440514	0.0029607	0.013993	0.00742479	0.00823342	0.00324428		-0.217334	-0.116718	-0.0758821	-0.136172	-0.376137		-1.60307	-0.760591	-0.477771	-1.57437
1016	1045		3411.85	29	10.90-11.13	0.0559711	0.144868	0.219178	0.304928	0.440491		0.0640162	0.140717	0.214147	0.318869	0.420432	1016	1045	-0.00804503	0.00415033	0.00503078	-0.013941	0.0200592		0.00145085		1016	1045	0.00846794	0.00636428	0.0203579	0.00463937	0.00783098	0.0103169	0.00821817	0.00580211	0.00417452	0.0410299		-0.233306	0.12036	0.145893	-0.40429	0.581716		-1.044	0.691587	0.411627	-3.869
1037	1049		1451.83	12	6.73-6.79	0.125682	0.213201	0.272672	0.351518	0.424722		0.122058	0.228075	0.29641	0.3576	0.44059	1037	1049	0.00362363	-0.0148743	-0.0237379	-0.00608234	-0.0158685		-0.0113879		1037	1049	0.0122213	0.008876	0.0139563	0.00898284	0.0072306	0.00909652	0.005551	0.0132359	0.00556692	0.0115002		0.0434836	-0.178491	-0.284855	-0.0729881	-0.190422		0.411966	-2.46092	-2.13757	-0.996873
1038	1049		1350.79	11	6.53-6.60	0.107985	0.212551	0.27256	0.344184	0.43114		0.121218	0.233568	0.296636	0.352703	0.441848	1038	1049	-0.0132331	-0.0210172	-0.024076	-0.00851913	-0.0107083		-0.0155107		1038	1049	0.0101212	0.00589389	0.0121052	0.01113	0.00529566	0.0175814	0.0112607	0.0111304	0.00836336	0.0104179		-0.145564	-0.23119	-0.264836	-0.0937104	-0.117791		-1.12983	-2.86415	-2.53586	-1.05987
1038	1050		1497.85	12	8.81-8.93	0.118841	0.25561	0.316626	0.382055	0.461734		0.130586	0.261664	0.329364	0.390572	0.460777	1038	1050	-0.0117455	-0.0060541	-0.0127374	-0.00851642	0.000956965		-0.0076193		1038	1050	0.0188547	0.0114677	0.0149583	0.0104045	0.0137485	0.0195034	0.0102807	0.0136917	0.0111629	0.0137362		-0.140946	-0.0726493	-0.152849	-0.102197	0.0114836		-0.749944	-0.680852	-1.08795	-0.966643
1039	1049		1187.72	10	6.59-6.78	0.140619	0.248466	0.301071	0.388815	0.459126		0.158474	0.252408	0.306687	0.382761	0.472013	1039	1049	-0.0178546	-0.00394194	-0.00561567	0.00605343	-0.0128875		-0.00684925		1039	1049	0.0152767	0.00253687	0.00697373	0.00713881	0.01533	0.00312179	0.0077397	0.011857	0.00562164	0.0131236		-0.178546	-0.0394194	-0.0561567	0.0605343	-0.128875		-1.98334	-0.838277	-0.707093	1.15389
1041	1054		1466.78	13	11.38-11.50	0.0441499	0.0656553	0.0761034	0.0853386	0.173542		0.0549893	0.0530495	0.0680227	0.10066	0.159537	1041	1054	-0.0108394	0.0126059	0.00808071	-0.0153217	0.0140054		0.00170618		1041	1054	0.00742032	0.00720953	0.00654925	0.0116075	0.0127658	0.00598358	0.0103658	0.0100672	0.00615442	0.00550482		-0.140912	0.163876	0.105049	-0.199182	0.18207		-1.96956	1.72923	1.16538	-2.01992
1050	1056		841.33	6	6.91-6.95	0.198326	0.277981	0.290258	0.339278	0.420465		0.227117	0.282767	0.305252	0.364529	0.4289	1050	1056	-0.0287913	-0.00478657	-0.014994	-0.0252505	-0.00843557		-0.0164516		1050	1056	0.0148075	0.0144458	0.0186612	0.0152256	0.0096791	0.0166391	0.0108811	0.0167428	0.00843433	0.00959254		-0.172748	-0.0287194	-0.0899642	-0.151503	-0.0506134		-2.23887	-0.458415	-1.03587	-2.51269
1057	1068		1171.63	11	10.31-10.33	0.0661461	0.073843	0.0960274	0.169462	0.303812		0.0675294	0.0858624	0.109665	0.191518	0.315007	1057	1068	-0.00138331	-0.0120194	-0.0136377	-0.0220556	-0.011195		-0.0120582		1057	1068	0.0126084	0.0136782	0.0203729	0.0198374	0.0179991	0.0118643	0.0116305	0.0163145	0.0163658	0.0180398		-0.0152164	-0.132213	-0.150015	-0.242612	-0.123145		-0.138392	-1.1595	-0.905023	-1.48546
1072	1089		2029.19	14	7.74-7.79	0.278508	0.36018	0.414217	0.482231	0.583756		0.288001	0.376804	0.433435	0.501774	0.594539	1072	1089	-0.00949318	-0.016624	-0.0192179	-0.0195434	-0.0107833		-0.0151323		1072	1089	0.00184638	0.00963134	0.00768785	0.00646279	0.0139432	2.42403e-14	0.0074306	0.00133475	0.010128	0.00748945		-0.132904	-0.232736	-0.269051	-0.273607	-0.150966		-8.90538	-2.36701	-4.26593	-2.81747
1081	1090		1204.75	8	9.23-9.32	0.61495	0.65483	0.660337	0.665255	0.670868		0.618346	0.657737	0.67493	0.666224	0.678752	1081	1090	-0.00339683	-0.00290784	-0.0145927	-0.000968843	-0.0078834		-0.00594993		1081	1090	0.0173248	0.00861455	0.010361	0.0156293	0.00854795	0.018858	0.00834104	0.00208265	0.00517108	0.00941511		-0.0271746	-0.0232627	-0.116742	-0.00775075	-0.0630672		-0.229751	-0.420026	-2.39163	-0.101934
1088	1096		1073.56	8	5.75-5.78	0.23232	0.359813	0.41529	0.507449	0.490186		0.233502	0.337483	0.410024	0.503229	0.515802	1088	1096	-0.00118265	0.02233	0.00526604	0.00421996	-0.0256159		0.00100351		1088	1096	0.0244599	0.0275625	0.026767	0.0193875	0.020103	0.0137468	0.0155659	0.012308	0.00716026	0.00930802		-0.00946119	0.17864	0.0421284	0.0337597	-0.204927		-0.0730058	1.22185	0.309596	0.353657
1088	1097		1176.57	9	6.53-6.57	0.244512	0.331729	0.393068	0.488284	0.486425		0.254307	0.325946	0.408623	0.487524	0.494152	1088	1097	-0.00979502	0.00578292	-0.0155551	0.000760365	-0.00772687		-0.00530673		1088	1097	0.0114371	0.00540149	0.00504212	0.01601	0.00446235	0.0108668	0.0045738	0.0111705	0.0116783	0.00632919		-0.0881552	0.0520463	-0.139996	0.00684328	-0.0695418		-1.07537	1.41517	-2.19833	0.0664587
1098	1113		1711.82	15	8.98-9.03	0.147896	0.213113	0.265541	0.29854	0.321831		0.153254	0.221989	0.270731	0.306531	0.338655	1098	1113	-0.00535761	-0.00887532	-0.00518995	-0.00799134	-0.0168242		-0.00884768		1098	1113	0.00209851	0.0085608	0.0174956	0.00349184	0.0109431	0.00261483	0.00919701	0.00318915	0.00118995	0.0122515		-0.0803642	-0.13313	-0.0778493	-0.11987	-0.252363		-2.76776	-1.22347	-0.505471	-3.75205
1102	1112		1196.58	10	5.58-5.62	0.392455	0.4314	0.445672	0.475972	0.461058		0.365597	0.440941	0.457558	0.454797	0.448509	1102	1112	0.0268581	-0.00954015	-0.0118861	0.0211749	0.0125496		0.00783125		1102	1112	0.00792746	0.00506731	0.0279794	0.0156131	0.00711119	0.0244681	0.0130496	0.0039691	0.0185791	0.0111539		0.268581	-0.0954015	-0.118861	0.211749	0.125496		1.80867	-1.18038	-0.728511	1.51127
1111	1124		1449.77	13	5.28-5.38	0.0192225	0.040741	0.0654425	0.0995852	0.141736		0.0183575	0.0459285	0.0605427	0.101109	0.136465	1111	1124	0.000864983	-0.00518749	0.00489977	-0.00152377	0.00527118		0.000864937		1111	1124	0.0230073	0.0157098	0.0191754	0.0182739	0.0214082	0.02663	0.0165689	0.019247	0.0182956	0.0248978		0.0112448	-0.0674373	0.063697	-0.019809	0.0685254		0.0425717	-0.393517	0.312368	-0.102064
1115	1127		1387.73	12	13.18-13.21	0.0479012	0.105173	0.126943	0.160263	0.149975		0.0314484	0.111039	0.131116	0.13293	0.18152	1115	1127	0.0164529	-0.00586679	-0.00417301	0.0273331	-0.0315447		0.000440299		1115	1127	0.0115556	0.017008	0.0144019	0.0180292	0.00827276	0.00281057	0.0171366	0.0117403	0.0185179	0.0278535		0.197434	-0.0704015	-0.0500761	0.327997	-0.378536		2.39624	-0.420874	-0.388995	1.83177
1133	1143		1297.73	10	8.89-9.00	0.112107	0.276282	0.343318	0.407602	0.436787		0.107166	0.268222	0.348409	0.426177	0.443331	1133	1143	0.00494119	0.00805925	-0.00509134	-0.0185755	-0.00654343		-0.00344197		1133	1143	0.00733299	0.00275179	0.00909597	0.0307215	0.00242463	0.0204272	0.00549045	0.00446701	0.00915836	0.0100303		0.0494119	0.0805925	-0.0509134	-0.185755	-0.0654343		0.394333	2.27292	-0.870216	-1.00363
1148	1155		971.44	7	10.41-10.47	0.0412081	0.087916	0.149849	0.211058	0.306494		0.038565	0.0942173	0.143753	0.218086	0.315916	1148	1155	0.00264307	-0.00630128	0.00609659	-0.00702814	-0.00942132		-0.00280222		1148	1155	0.00529382	0.00499211	0.0162079	0.00828102	0.00564051	0.0101412	0.00632367	0.0086855	0.00546866	0.00607974		0.0185015	-0.044109	0.0426761	-0.049197	-0.0659493		0.400178	-1.35467	0.574253	-1.22666
1156	1167		1143.48	11	9.88-9.91	0.0366442	0.0860053	0.0986374	0.11105	0.152772		0.0465707	0.0932433	0.115457	0.127703	0.153635	1156	1167	-0.00992646	-0.00723799	-0.0168191	-0.0166528	-0.000863365		-0.0102999		1156	1167	0.00798453	0.00846974	0.0167957	0.0108315	0.00982388	0.00265984	0.00316418	0.0048635	0.00276431	0.0124427		-0.109191	-0.0796179	-0.18501	-0.183181	-0.00949701		-2.04293	-1.38656	-1.66603	-2.58023
1168	1193		3217.63	23	9.32-9.44	0.278267	0.326207	0.370105	0.445358	0.496108		0.295358	0.346055	0.38597	0.43723	0.506235	1168	1193	-0.0170904	-0.019848	-0.0158645	0.0081281	-0.0101271		-0.0109604		1168	1193	0.0197964	0.0188108	0.0218252	0.0109356	0.0147847	0.0107677	0.0111371	0.0247655	0.00813121	0.00686652		-0.393079	-0.456503	-0.364884	0.186946	-0.232924		-1.31356	-1.57259	-0.832414	1.03309
1203	1212		1048.47	9	7.78-7.80	0.0659924	0.0804143	0.0919962	0.102894	0.168561		0.0632831	0.077827	0.0969557	0.120211	0.161145	1203	1212	0.00270929	0.00258723	-0.00495954	-0.0173172	0.00741575		-0.0019129		1203	1212	0.00911559	0.00659469	0.00234826	0.00474113	0.0060597	0.00416003	0.00297479	0.00900647	0.00807745	0.0119179		0.0243836	0.0232851	-0.0446358	-0.155855	0.0667418		0.468327	0.619415	-0.922923	-3.20245
1209	1224		1972.89	15	7.33-7.38	0.65478	0.668206	0.682344	0.687396	0.712228		0.66578	0.671393	0.69435	0.703252	0.708553	1209	1224	-0.0109996	-0.00318766	-0.0120061	-0.0158553	0.00367532		-0.00767467		1209	1224	0.0158145	0.0190981	0.019452	0.0223373	0.018586	0.0311813	0.023293	0.0181609	0.0146527	0.0234443		-0.164994	-0.0478149	-0.180091	-0.23783	0.0551299		-0.544924	-0.183298	-0.781418	-1.02799
1210	1216		897.348	6	11.54-11.57	0.0152532	0.00551493	0.0134759	0.0198241	0.0565316		0.0153749	0.0111652	0.00508756	0.0189082	0.0461167	1210	1216	-0.000121642	-0.00565025	0.00838831	0.00091592	0.0104149		0.00278945		1210	1216	0.00658955	0.00292761	0.0111246	0.0106647	0.0121343	0.00342786	0.0132677	0.00369552	0.00938856	0.0116022		-0.000729851	-0.0339015	0.0503299	0.00549552	0.0624896		-0.028365	-0.720295	1.23942	0.111653
1213	1224		1526.71	11	11.07-11.16	0.0457921	0.0827613	0.106685	0.168226	0.282664		0.0563351	0.117117	0.118277	0.166725	0.282987	1213	1224	-0.010543	-0.0343552	-0.0115919	0.00150136	-0.000323474		-0.0110624		1213	1224	0.00288412	0.00476133	0.00420746	0.00572741	0.00326011	0.00455807	0.0347867	0.00492795	0.00189769	0.00512714		-0.115973	-0.377907	-0.12751	0.0165149	-0.00355821		-3.38549	-1.69477	-3.09852	0.43099
1225	1246		2360.17	17	10.36-10.41	0.174926	0.245532	0.332408	0.428505	0.489175		0.176479	0.25799	0.339468	0.432886	0.494253	1225	1246	-0.00155373	-0.0124579	-0.00705935	-0.00438121	-0.00507788		-0.00610602		1225	1246	0.00906901	0.00684451	0.00221703	0.0063662	0.00585698	0.00393319	0.00515874	0.00999491	0.00727735	0.0065914		-0.0264134	-0.211785	-0.120009	-0.0744806	-0.0863239		-0.27224	-2.51757	-1.19431	-0.784831
1235	1256		2302.13	17	10.06-10.12	0.080168	0.15826	0.217268	0.265708	0.31114		0.0736865	0.166186	0.218788	0.273706	0.325229	1235	1256	0.00648147	-0.00792678	-0.00152011	-0.00799745	-0.0140888		-0.00501032		1235	1256	0.00948481	0.00687867	0.00969377	0.0069784	0.0109577	0.0160028	0.00768349	0.0122934	0.00741089	0.00853257		0.110185	-0.134755	-0.0258418	-0.135957	-0.239509		0.603482	-1.33133	-0.168176	-1.36079
1241	1261		2072.01	18	11.14-11.24	0.200034	0.222169	0.223561	0.242783	0.245889		0.206767	0.220365	0.219227	0.217087	0.244956	1241	1261	-0.00673209	0.00180406	0.00433433	0.0256956	0.000932255		0.00520683		1241	1261	0.00834187	0.00847877	0.00298035	0.00895697	0.0307338	0.00890871	0.00597338	0.00253574	0.0438369	0.0123922		-0.121178	0.0324731	0.0780179	0.462521	0.0167806		-0.955405	0.301276	1.91849	0.994714
1247	1256		986.461	7	9.88-9.92	0.13854	0.257106	0.318225	0.36632	0.361516		0.148402	0.272168	0.313618	0.357586	0.379984	1247	1256	-0.00986226	-0.0150625	0.00460768	0.00873475	-0.0184676		-0.00600998		1247	1256	0.0325851	0.00295437	0.00443753	0.00790171	0.0274467	0.0186115	0.00757676	0.004342	0.0158473	0.00747249		-0.0690358	-0.105437	0.0322537	0.0611433	-0.129273		-0.455207	-3.20804	1.28547	0.854359
1248	1259		1168.62	9	11.85-11.92	-0.0101342	0.0253977	0.0261373	0.0813025	0.102944		-0.00281294	0.0144159	0.0263799	0.0877046	0.0935128	1248	1259	-0.00732123	0.0109818	-0.00024262	-0.00640216	0.00943101		0.00128935		1248	1259	0.023828	0.00975854	0.00457114	0.0110186	0.00787065	0.0110731	0.0154199	0.0143536	0.00967247	0.013598		-0.065891	0.0988358	-0.00218358	-0.0576194	0.0848791		-0.482611	1.04234	-0.0278966	-0.756314
1253	1260		798.472	6	8.63-8.70	0.0407896	0.0779898	0.175829	0.360077	0.454515		0.0370731	0.0801144	0.194657	0.354536	0.451936	1253	1260	0.00371642	-0.00212463	-0.0188279	0.0055408	0.00257985		-0.00182308		1253	1260	0.0187303	0.0182182	0.0198838	0.0296682	0.0196361	0.0213515	0.0151124	0.0131734	0.0237308	0.0143423		0.0222985	-0.0127478	-0.112967	0.0332448	0.0154791		0.226634	-0.155467	-1.36723	0.252608
1280	1290		1042.47	9	13.61-13.63	0.0175516	0.0232456	0.0305925	0.0307728	0.0845937		0.00795937	0.0217713	0.0228731	0.0367436	0.0829701	1280	1290	0.00959221	0.0014743	0.0077194	-0.00597081	0.00162355		0.00288773		1280	1290	0.0170177	0.0236398	0.0263095	0.0167444	0.0281129	0.0223917	0.0168148	0.0189557	0.0204919	0.0237489		0.0863299	0.0132687	0.0694746	-0.0537373	0.0146119		0.590735	0.0880234	0.412324	-0.3908
1283	1290		827.378	6	11.50-11.60	0.545709	0.551615	0.53221	0.537574	0.551437		0.542312	0.552904	0.547378	0.564958	0.555741	1283	1290	0.00339701	-0.00128831	-0.0151672	-0.0273841	-0.00430423		-0.00894935		1283	1290	0.0301652	0.0181515	0.0198776	0.00846219	0.0218284	0.0141229	0.0116769	0.0100948	0.0111286	0.0150381		0.0203821	-0.00772985	-0.091003	-0.164304	-0.0258254		0.176651	-0.103388	-1.17836	-3.39263
1290	1301		1469.8	11	9.91-9.96	0.00892754	0.0159246	0.0285262	0.040246	0.0332056		0.0222628	0.00764545	0.0332223	0.00197612	0.0264027	1290	1301	-0.0133353	0.0082791	-0.00469607	0.0382699	0.00680285		0.0070641		1290	1301	0.00958765	0.0309761	0.0282856	0	0.0197168	0.0132528	0.0183612	0.0353745	0.0122018	0.0166433		-0.146688	0.0910701	-0.0516567	0.420969	0.0748313		-1.41206	0.398228	-0.179583	5.43244
1330	1344		1656.81	14	7.75-7.80	0.0447377	0.127203	0.202447	0.343991	0.479059		0.0466935	0.132317	0.205173	0.337895	0.501576	1330	1344	-0.00195576	-0.0051145	-0.00272548	0.0060968	-0.0225171		-0.0052432		1330	1344	0.0102095	0.00344872	0.00588742	0.00551013	0.0118149	0.00440117	0.00469542	0.00408006	0.0166205	0.0145064		-0.0273806	-0.071603	-0.0381567	0.0853552	-0.315239		-0.304691	-1.52056	-0.659035	0.603081
1343	1362		2217.25	18	8.38-8.48	0.0858252	0.11432	0.126816	0.173645	0.226373		0.0922006	0.127259	0.153389	0.175339	0.23245	1343	1362	-0.00637537	-0.012939	-0.0265724	-0.0016942	-0.0060772		-0.0107316		1343	1362	0.0114188	0.0119936	0.0120246	0.011102	0.0143252	0.0113268	0.0130867	0.0128168	0.0106384	0.0115531		-0.114757	-0.232901	-0.478303	-0.0304955	-0.10939		-0.686563	-1.2625	-2.61884	-0.190842
1343	1368		2832.54	24	7.62-7.70	0.343778	0.445309	0.466431	0.507425	0.489083		0.346941	0.444524	0.472511	0.501486	0.500725	1343	1368	-0.003163	0.000784391	-0.00608004	0.00593856	-0.0116422		-0.00283246		1343	1368	0.0134773	0.00477052	0.00817942	0.0125533	0.0103674	0.0225384	0.00416076	0.0142985	0.00975124	0.0134078		-0.0759119	0.0188254	-0.145921	0.142525	-0.279413		-0.20862	0.214627	-0.639296	0.647088
1344	1356		1404.82	12	9.27-9.34	0.0363607	0.0382852	0.062268	0.0723683	0.0881519		0.0366456	0.0483383	0.0682673	0.079995	0.101311	1344	1356	-0.00028495	-0.0100531	-0.00599925	-0.00762674	-0.0131592		-0.00742465		1344	1356	0.0156545	0.0114629	0.0109318	0.0170983	0.016976	0.0072306	0.00994055	0.0105883	0.0107646	0.0212001		-0.0034194	-0.120637	-0.071991	-0.0915209	-0.15791		-0.028622	-1.14761	-0.682767	-0.653807
1345	1366		2401.32	20	8.11-8.18	0.24149	0.301393	0.297229	0.340622	0.35899		0.2423	0.323507	0.329588	0.351258	0.358282	1345	1366	-0.000810224	-0.0221141	-0.0323585	-0.0106361	0.000708284		-0.0130421		1345	1366	0.0101437	0.00457485	0.0162813	0.00477791	0.0138503	0.0175905	0.00333687	0.0253222	0.0210035	0.0218781		-0.0162045	-0.442282	-0.64717	-0.212722	0.0141657		-0.0691112	-6.76428	-1.86172	-0.855256
1347	1361		1699.96	13	9.23-9.28	0.283772	0.398188	0.458547	0.542104	0.598312		0.316632	0.41229	0.488899	0.543712	0.561901	1347	1361	-0.0328598	-0.014102	-0.0303518	-0.0016085	0.0364115		-0.00850211		1347	1361	0.0416385	0.00918071	0.0219147	0.020263	0.0269462	0.00357405	0.0222458	0.0191369	0.0434396	0.0326348		-0.427178	-0.183325	-0.394573	-0.0209104	0.473349		-1.36187	-1.01494	-1.80692	-0.0581225
[truncated: 8 more columns]

## Sheet: VPS34 Summary
VPS34				Date:			01.01.19		SD	0.0125174															Unhide														for STDEV	Threshold Value=		0.5
Global Color scale				Experiment date:			25.12.18			-0.000505448																														Threshold percent		0.02
0.1	0.35	0.7		Protein:			VPS34																																	t-threshold		2.776
				Instrument:			Waters Synapt G2 Si										-0.1	-0.05	-0.02	0.02	0.05	0.1
																													STDEVS					STDEVS
		Max Frac Deut		0.67		a	Apo					b	With Lipids						% Differences (Apo - With Lipids)										a	Default State				b	Lipids					Differences in Daltons (Differences >+/- 0.5Da Highlighted						t-test	*=assumes triplicate values, a p=0.05 test
Start	End	Mod	m/z	#D	RT	0.005	0.05	0.5	5	50		0.005	0.05	0.5	5	50	Start	End	0.005	0.05	0.5	5	50		avg		Start	End	0.005	0.05	0.5	5	50	0.005	0.05	0.5	5	50		0.005	0.05	0.5	5	50		0.005	0.05	0.5	5
4	14		1375.6	10	12.16-12.19	0.00711925	0.0210933	0.0475401	0.0355622	0.0375933		0.00330776	0.0148231	0.0250015	0.0272231	0.022866	4	14	0.004	0.00627015	0.0225387	0.0083391	0.0147273		0.011175		4	14	0.0040897	0.0151627	0.00672955	0.00189866	0.0125075	0.00134612	0.0151787	0.0110003	0.0181069	0.00707254		0.04	0.0627015	0.225387	0.083391	0.147273		1.5333	0.506196	3.02727	0.793345
8	27		2323.16	19	8.39-8.46	0.202017	0.331281	0.414239	0.525938	0.611478		0.210671	0.344797	0.438106	0.521155	0.614582	8	27	-0.00865373	-0.013516	-0.023867	0.00478319	-0.00310393		-0.0088715		8	27	0.0142738	0.00784336	0.0145788	0.0106104	0.00714297	0.0150682	0.00801241	0.00631587	0.0203989	0.0124647		-0.164421	-0.256804	-0.453473	0.0908806	-0.0589746		-0.722156	-2.08791	-2.60188	0.360309
19	26		857.545	7	10.20-10.26	0.0631441	0.0641727	0.0672348	0.0905776	0.134516		0.0593196	0.06719	0.065826	0.084816	0.140225	19	26	0.00382452	-0.00301727	0.00140874	0.00576162	-0.00570853		0.000453817		19	26	0.00325117	0.0052	0.00892175	0.00717783	0.0125309	0.00869104	0.00902559	0.0206369	0.0085678	0.00135885		0.0267716	-0.0211209	0.00986119	0.0403313	-0.0399597		0.71388	-0.501716	0.108528	0.892842
27	39		1535.85	12	6.22-6.29	0.376511	0.513506	0.567439	0.580457	0.569419		0.392806	0.508489	0.575747	0.564427	0.574162	27	39	-0.0162956	0.00501741	-0.00830808	0.0160301	-0.00474341		-0.00165993		27	39	0.0106852	0.00800361	0.0165459	0.0168234	0.00412376	0.0352243	0.00762326	0.0150185	0.00472525	0.0160321		-0.195548	0.060209	-0.099697	0.192361	-0.0569209		-0.766788	0.78624	-0.643978	1.58889
42	49		892.496	6	11.41-11.48	0.117182	0.326666	0.616691	0.753285	0.790024		0.159228	0.328316	0.618961	0.776098	0.787331	42	49	-0.0420453	-0.00165	-0.00227015	-0.0228129	0.00269353		-0.013217		42	49	0.0223433	0.0143493	0.00716095	0.0138488	0.007999	0.0227552	0.00649129	0.0104502	0.00697363	0.0100592		-0.252272	-0.0099	-0.0136209	-0.136878	0.0161612		-2.28356	-0.181462	-0.310381	-2.54834
50	57		958.382	7	9.03-9.07	0.257053	0.312284	0.353363	0.383891	0.407505		0.27359	0.327762	0.370531	0.398084	0.419321	50	57	-0.0165365	-0.0154783	-0.0171678	-0.0141932	-0.0118166		-0.0150385		50	57	0.0123663	0.00696119	0.0170576	0.00385991	0.00767783	0.0125714	0.00195181	0.0150947	0.00568102	0.00647186		-0.115755	-0.108348	-0.120175	-0.0993522	-0.0827164		-1.62423	-3.70822	-1.30548	-3.57926
57	75		2104.16	16	7.93-8.03	0.0888291	0.120654	0.137208	0.164501	0.218955		0.0963008	0.125374	0.137507	0.170925	0.223364	57	75	-0.00747174	-0.00472034	-0.000298881	-0.00642444	-0.00440951		-0.00466498		57	75	0.0104678	0.0107797	0.0107424	0.00871278	0.00893116	0.0100168	0.00866856	0.0120314	0.0090167	0.0128448		-0.119548	-0.0755254	-0.00478209	-0.102791	-0.0705522		-0.893232	-0.591051	-0.0320953	-0.887465
58	64		859.402	6	11.53-11.59	0.0200515	0.0238689	0.0265776	0.0355699	0.086		0.0161167	0.025156	0.0391381	0.0450002	0.101091	58	64	0.00393483	-0.00128706	-0.0125604	-0.00943035	-0.0150913		-0.00688687		58	64	0.00991791	0.00171493	0.0122435	0.0076209	0.00557338	6.19403e-05	0.00350896	0.00465622	0.00674552	0.00395572		0.023609	-0.00772239	-0.0753627	-0.0565821	-0.0905478		0.687159	-0.570785	-1.66084	-1.60491
64	72		945.54	7	9.85-9.93	0.0591994	0.132482	0.219005	0.421598	0.482567		0.0727857	0.117655	0.232513	0.415214	0.478868	64	72	-0.0135864	0.0148269	-0.0135077	0.00638465	0.00369829		-0.000436844		64	72	0.00409765	0.00189126	0.008158	0.00570853	0.00795586	0.0115586	0.00436588	0.00377804	0.00440533	0.00925458		-0.0951045	0.103788	-0.0945537	0.0446925	0.0258881		-1.91889	5.3975	-2.60234	1.53363
90	107		2108.2	14	10.17-10.29	0.0694472	0.121294	0.172017	0.224579	0.325894		0.0566487	0.127832	0.170779	0.235424	0.298063	90	107	0.0127985	-0.00653763	0.00123827	-0.0108448	0.027831		0.00489708		90	107	0.0140544	0.0134034	0.0160626	0.00811823	0.0273284	0.0274362	0.0142031	0.0171635	0.0118165	0.00467687		0.179179	-0.0915269	0.0173358	-0.151827	0.389634		0.719111	-0.579833	0.0912377	-1.3102
91	105		1752.02	11	8.54-8.62	0.0439986	0.096303	0.11432	0.184576	0.279746		0.0607764	0.0929923	0.115164	0.202919	0.284942	91	105	-0.0167777	0.00331072	-0.000843691	-0.018343	-0.00519674		-0.00757009		91	105	0.010672	0.0117206	0.0191792	0.0435912	0.0415364	0.012062	0.0152783	0.0226782	0.0255312	0.0282475		-0.184555	0.0364179	-0.0092806	-0.201773	-0.0571642		-1.80436	0.297792	-0.0492011	-0.628909
108	126		1931.03	16	11.83-11.88	0.126569	0.17138	0.18563	0.237246	0.311757		0.122327	0.170594	0.190844	0.242852	0.303695	108	126	0.0042417	0.000785914	-0.0052139	-0.0056055	0.00806259		0.00045416		108	126	0.0129071	0.00461278	0.00581959	0.00951586	0.00543218	0.011435	0.00419002	0.00482864	0.006968	0.0169138		0.0678672	0.0125746	-0.0834224	-0.0896881	0.129001		0.426054	0.218439	-1.19423	-0.823198
109	126		1817.94	15	10.83-10.87	0.144974	0.196107	0.20181	0.258691	0.343353		0.138143	0.190111	0.210884	0.261563	0.347061	109	126	0.00683075	0.00599532	-0.00907433	-0.00287184	-0.00370876		-0.000565771		109	126	0.00459343	0.00435483	0.0137023	0.0053199	0.00415532	0.0111918	0.00561502	0.00659423	0.00897682	0.01425		0.102461	0.0899299	-0.136115	-0.0430776	-0.0556313		0.977962	1.46136	-1.03359	-0.476692
109	129		2117.13	18	11.94-11.98	0.151318	0.214265	0.22391	0.261888	0.323297		0.144789	0.203295	0.212041	0.255398	0.324061	109	129	0.00652852	0.0109694	0.0118691	0.00649055	-0.000764179		0.00701867		109	129	0.0192325	0.00427231	0.00646186	0.0183786	0.0191108	0.03009	0.0162901	0.0212519	0.019867	0.0156479		0.117513	0.197449	0.213643	0.11683	-0.0137552		0.316643	1.12817	0.925504	0.415381
110	129		2016.08	17	11.57-11.62	0.149951	0.193893	0.214003	0.245203	0.316776		0.153449	0.199624	0.210189	0.245566	0.311797	110	129	-0.0034986	-0.00573082	0.00381449	-0.000362687	0.00497937		-0.000159649		110	129	0.011499	0.00546594	0.00825979	0.0163773	0.00674363	0.00819701	0.013732	0.0109441	0.0192146	0.0131554		-0.0594761	-0.0974239	0.0648463	-0.00616567	0.0846493		-0.429113	-0.671592	0.481861	-0.0248817
120	130		1076.6	9	10.98-11.01	0.0490231	0.083999	0.101822	0.116715	0.194877		0.0486899	0.0881353	0.0989017	0.126091	0.197052	120	130	0.000333167	-0.00413632	0.0029204	-0.00937612	-0.00217512		-0.0024868		120	130	0.0236506	0.0207489	0.0244496	0.0272277	0.0274697	0.0260967	0.0258569	0.0267617	0.0346133	0.0238478		0.00299851	-0.0372269	0.0262836	-0.0843851	-0.0195761		0.0163849	-0.216101	0.139544	-0.368763
130	136		849.396	6	11.50-11.60	0.0941784	0.131345	0.153974	0.284393	0.371316		0.0926376	0.122756	0.155105	0.295722	0.360399	130	136	0.0015408	0.00858881	-0.00113159	-0.0113284	0.0109172		0.00171736		130	136	0.00989502	0.00991493	0.0118925	0.0106177	0.014791	0.010308	0.00845647	0.0145818	0.0116729	0.0162234		0.00924478	0.0515328	-0.00678955	-0.0679701	0.065503		0.186773	1.14157	-0.104162	-1.24347
137	150		1708.86	12	9.23-9.33	0.0696922	0.099966	0.111819	0.136872	0.226032		0.0717995	0.0920708	0.114727	0.146557	0.226247	137	150	-0.00210734	0.00789527	-0.00290796	-0.0096852	-0.000214552		-0.00140396		137	150	0.00124316	0.00580672	0.0166107	0.00427313	0.00490261	0.00985983	0.00159863	0.00578396	0.00391107	0.00264303		-0.0252881	0.0947433	-0.0348955	-0.116222	-0.00257463		-0.367283	2.27056	-0.286359	-2.8959
150	167		1833.88	15	6.26-6.30	0.304015	0.359139	0.384887	0.453071	0.553311		0.307166	0.364413	0.395668	0.466737	0.546711	150	167	-0.00315164	-0.00527363	-0.010781	-0.0136667	0.0065998		-0.00525463		150	167	0.0104059	0.00374836	0.0201368	0.00523323	0.0220072	2.26242e-14	0.00271881	0.00965194	0.00901632	0.0152929		-0.0472746	-0.0791045	-0.161715	-0.205	0.098997		-0.524589	-1.97259	-0.836221	-2.27063
151	167		1704.84	14	6.14-6.18	0.322547	0.373512	0.406706	0.480965	0.55634		0.3471	0.393037	0.411587	0.483144	0.548593	151	167	-0.0245529	-0.0195254	-0.00488102	-0.00217878	0.00774691		-0.00867823		151	167	0.0131727	0.00729797	0.0191845	0.0118454	0.00687751	0.00326119	0.00627601	0.0045064	0.00653625	0.00699925		-0.34374	-0.273355	-0.0683343	-0.030503	0.108457		-3.13379	-3.5135	-0.429	-0.278937
159	169		1135.56	9	6.72-6.78	0.106699	0.32895	0.568547	0.654445	0.66675		0.120559	0.34494	0.585149	0.663749	0.663824	159	169	-0.0138604	-0.0159899	-0.0166013	-0.00930381	0.00292687		-0.0105657		159	169	0.00704196	0.00904892	0.00389619	0.0111274	0.00376534	0.0117937	0.0171396	0.00823648	0.0142227	0.00802537		-0.124743	-0.143909	-0.149412	-0.0837343	0.0263418		-1.74772	-1.42894	-3.15582	-0.892367
176	187		1377.75	11	4.33-4.37	0.0708421	0.158261	0.223132	0.373357	0.374153		0.0682422	0.149918	0.234327	0.316832	0.357012	176	187	0.00259986	0.00834274	-0.0111948	0.0565246	0.0171407		0.0146826		176	187	0.00571872	0.0217289	0.0438114	0.0116339	0.0162478	0.0119548	0.0113674	0.0210164	0.0134535	0.018287		0.0285985	0.0917701	-0.123143	0.62177	0.188548		0.339799	0.589252	-0.399042	5.5045
204	214		1310.63	10	6.21-6.27	0.4519	0.513211	0.512824	0.527825	0.539793		0.445627	0.516247	0.526243	0.536806	0.550861	204	214	0.00627313	-0.00303582	-0.0134191	-0.0089806	-0.0110672		-0.00604591		204	214	0.0228543	0.013071	0.0191475	0.0156439	0.0145051	0.0341663	0.022464	0.0140739	0.0110379	0.0116685		0.0627313	-0.0303582	-0.134191	-0.089806	-0.110672		0.26433	-0.202315	-0.978082	-0.812437
207	214		954.464	7	5.53-5.58	0.427663	0.455937	0.448392	0.451699	0.471937		0.404491	0.451628	0.434647	0.454857	0.459	207	214	0.0231723	0.00430896	0.0137443	-0.003158	0.0129377		0.0102011		207	214	0.0136817	0.0119301	0.0144299	0.0230704	0.0192819	0.024226	0.024294	0.0180559	0.014623	0.0133883		0.162206	0.0301627	0.0962104	-0.022106	0.0905642		1.44256	0.275753	1.02996	-0.200254
221	230		1242.56	9	6.03-6.08	0.0993197	0.202634	0.304959	0.444036	0.446344		0.109223	0.209037	0.308392	0.433988	0.451408	221	230	-0.00990332	-0.00640249	-0.00343284	0.0100483	-0.00506385		-0.00295085		221	230	0.0172262	0.0221197	0.0400534	0.0433708	0.0363833	0.0230325	0.0316081	0.0345033	0.0336833	0.0369332		-0.0891299	-0.0576224	-0.0308955	0.0904343	-0.0455746		-0.596384	-0.287446	-0.112471	0.316931
221	235		1837.86	14	9.34-9.44	0.0632232	0.121316	0.217006	0.300038	0.410237		0.0437854	0.142069	0.209825	0.317714	0.404846	221	235	0.0194378	-0.0207533	0.0071806	-0.0176756	0.00539041		-0.00128401		221	235	0.0106076	0.0102728	0.0183741	0.0170326	0.0146224	0.0230376	0.0119578	0.0109575	0.0130126	0.0196667		0.27213	-0.290546	0.100528	-0.247458	0.0754657		1.32745	-2.28017	0.581358	-1.42831
222	232		1315.58	10	5.58-5.61	0.0505919	0.147171	0.214467	0.33698	0.408093		0.0559007	0.138205	0.21076	0.335397	0.411697	222	232	-0.00530881	0.00896627	0.00370731	0.00158328	-0.00360373		0.00106887		222	232	0.00452731	0.00759388	0.016106	0.00376687	0.0090709	0.00382254	0.0112018	0.012227	0.0248221	0.00678985		-0.0530881	0.0896627	0.0370731	0.0158328	-0.0360373		-1.55186	1.14755	0.317549	0.109229
222	235		1690.79	13	8.50-8.61	0.03107	0.0945845	0.151285	0.237018	0.36949		0.0197271	0.0899796	0.165891	0.242588	0.353354	222	235	0.0113429	0.00460494	-0.0146056	-0.00557015	0.0161362		0.00238165		222	235	0.0034651	0.00411642	0.011606	0.00201917	0.0112569	0.0126634	0.0082147	0.00984914	0.00616969	0.0111498		0.147458	0.0598642	-0.189873	-0.0724119	0.20977		1.49644	0.868052	-1.66193	-1.48617
224	230		836.382	6	6.82-6.86	0.397503	0.520388	0.505045	0.529452	0.529466		0.348958	0.490156	0.498123	0.485106	0.486571	224	230	0.0485448	0.0302318	0.00692189	0.0443465	0.0428948		0.034588		224	230	0.0144254	0.0122697	0.0163381	0.0067893	0.00263333	0.0230699	0.0335943	0.0355545	0.0281455	0.0259851		0.291269	0.181391	0.0415313	0.266079	0.257369		3.09027	1.4641	0.306401	2.65295
235	247		1515.68	11	9.47-9.54	0.308107	0.345425	0.402339	0.408978	0.460139		0.297931	0.355703	0.389922	0.405538	0.453703	235	247	0.0101767	-0.0102773	0.0124172	0.00344003	0.00643664		0.00443864		235	247	0	0	0.0334351	0.00813379	0.0223951	0.0110866	0.0224198	0.0200699	0.0172693	0.00286187		0.111943	-0.113051	0.13659	0.0378403	0.070803		1.5899	-0.79398	0.551521	0.312133
236	247		1352.62	10	8.99-9.08	0.299689	0.373453	0.385775	0.392925	0.415307		0.30354	0.379523	0.392279	0.403204	0.425121	236	247	-0.0038503	-0.00607	-0.00650433	-0.0102788	-0.00981343		-0.00730337		236	247	0	0.0121621	0.00231134	0.0136694	0.00691179	0.01352	0.00622507	0.0141516	0.00992209	0.0028291		-0.038503	-0.0607	-0.0650433	-0.102788	-0.0981343		-0.493263	-0.76951	-0.785669	-1.05403
251	260		1155.61	7	9.38-9.43	0.049336	0.0967454	0.174069	0.273204	0.464876		0.057136	0.105253	0.149943	0.301537	0.456856	251	260	-0.0078	-0.00850768	0.024126	-0.0283333	0.00801962		-0.00249906		251	260	0.0160539	0.00611429	0.0146301	0.00993433	0.0171689	0.0209111	0.00999488	0.0155358	0.0161505	0.0129034		-0.0546	-0.0595537	0.168882	-0.198333	0.0561373		-0.512462	-1.25766	1.95817	-2.58815
251	262		1373.68	9	10.05-10.12	0.168416	0.222912	0.312148	0.377102	0.517271		0.174758	0.260542	0.304286	0.3732	0.508527	251	262	-0.00634196	-0.0376295	0.00786252	0.00390232	0.00874395		-0.00469254		251	262	0.00490265	0.0297237	0.0115022	0.0250411	0.00148706	0.00257861	0.00222272	0.0243629	0.00744113	0.0212133		-0.0570776	-0.338666	0.0707627	0.0351209	0.0786955		-1.98298	-2.18663	0.505475	0.258735
252	262		1244.64	8	9.61-9.66	0.122303	0.242626	0.315043	0.413175	0.528836		0.129499	0.250743	0.319512	0.438838	0.545526	252	262	-0.00719571	-0.00811698	-0.00446959	-0.0256625	-0.0166901		-0.012427		252	262	0.0192701	0.0123927	0.0120519	0.00428041	0.00855448	0.0153151	0.0117853	0.00988489	0.00331828	0.000564552		-0.0575657	-0.0649358	-0.0357567	-0.2053	-0.133521		-0.506334	-0.822078	-0.496663	-8.20695
254	260		814.413	4	8.80-8.86	0.0586522	0.129102	0.236046	0.387822	0.507918		0.109121	0.157721	0.287683	0.377655	0.522597	254	260	-0.050469	-0.0286183	-0.0516369	0.0101675	-0.0146795		-0.0270472		254	260	0.00909478	0.00492687	0.0150507	0.0144657	0.00708507	0.0163175	0.00564216	0.00395746	0.0235649	0.0454634		-0.201876	-0.114473	-0.206548	0.0406701	-0.0587179		-4.67937	-6.61747	-5.74707	0.636899
265	291		2963.59	24	7.64-7.72	0.375453	0.470991	0.494596	0.531312	0.547021		0.37346	0.473818	0.50823	0.54023	0.548479	265	291	0.00199248	-0.00282655	-0.0136336	-0.00891772	-0.00145752		-0.00496858		265	291	0.0133558	0.0134331	0.0143443	0.015703	0.0206414	0.0221501	0.012374	0.0142091	0.0157527	0.0128247		0.0478194	-0.0678373	-0.327206	-0.214025	-0.0349806		0.133425	-0.268057	-1.16956	-0.694433
276	301		2804.46	23	8.99-9.15	0.205571	0.251475	0.277206	0.308997	0.356485		0.223972	0.230812	0.294782	0.308811	0.334201	276	301	-0.0184001	0.0206629	-0.0175768	0.000186308	0.0222831		0.00143108		276	301	0.00385386	0.00409286	0.024472	0.0056586	0.0357364	0.00839033	0.0162826	0.0195526	0.0182417	0.0166744		-0.423201	0.475246	-0.404267	0.00428507	0.512512		-3.4517	2.13169	-0.97191	0.0168957
297	309		1473.83	10	9.09-9.13	0.162347	0.286601	0.321559	0.404003	0.535225		0.151955	0.299264	0.329491	0.404912	0.515362	297	309	0.0103915	-0.0126624	-0.00793269	-0.000909701	0.0198625		0.00174985		297	309	0.00444791	0.00364119	0.00718657	0.00394896	0.00925776	0.0175188	0.00581463	0.00879746	0.0108206	0.022566		0.103915	-0.126624	-0.0793269	-0.00909701	0.198625		0.995793	-3.19678	-1.20953	-0.136791
297	310		1636.89	11	9.98-10.02	0.208854	0.323115	0.351451	0.421123	0.551347		0.218677	0.329447	0.353236	0.428633	0.522685	297	310	-0.00982293	-0.00633229	-0.0017844	-0.00750991	0.0286612		0.000642334		297	310	0.0150402	0.0118223	0.0254647	0.0108114	0.0117765	0.0182483	0.0114986	0.0113967	0.0132782	0.0291924		-0.108052	-0.0696552	-0.0196284	-0.082609	0.315273		-0.719474	-0.665043	-0.110782	-0.759655
297	311		1765.94	12	9.76-9.81	0.215936	0.364289	0.396339	0.461165	0.563398		0.220924	0.352082	0.389533	0.450772	0.544723	297	311	-0.00498781	0.0122067	0.00680647	0.010393	0.0186752		0.00861873		297	311	0.0145735	0.00932724	0.0230098	0.0182953	0.0259724	0.0181547	0.0172942	0.0129749	0.0266005	0.0245913		-0.0598537	0.146481	0.0816776	0.124716	0.224103		-0.371089	1.07601	0.44629	0.557578
297	314		2138.07	15	9.57-9.61	0.172347	0.281919	0.301877	0.364015	0.459327		0.174755	0.27522	0.304025	0.358863	0.449782	297	314	-0.00240826	0.00669861	-0.00214876	0.00515244	0.00954507		0.00336782		297	314	0.00547493	0.00394567	0.0235058	0.00907383	0.00846169	0.00475075	0.00578259	0.00290557	0.00542955	0.0101657		-0.0361239	0.100479	-0.0322313	0.0772866	0.143176		-0.575441	1.65736	-0.157138	0.843965
322	333		1455.78	11	9.30-9.37	0.11443	0.173504	0.201856	0.328179	0.535266		0.110581	0.170208	0.201948	0.336105	0.514845	322	333	0.00384885	0.00329607	-9.21303e-05	-0.00792592	0.020422		0.00390977		322	333	0.0119476	0.0114419	0.0131802	0.0198269	0.0131916	0.0105072	0.011132	0.0119004	0.0147383	0.0112824		0.0423373	0.0362567	-0.00101343	-0.0871851	0.224642		0.418991	0.357621	-0.00898619	-0.555688
327	333		836.488	6	7.23-7.31	-0.0025403	0.0169813	0.0488746	0.257652	0.468087		0.0111338	0.0323512	0.0536067	0.236377	0.448045	327	333	-0.0136741	-0.0153699	-0.00473209	0.0212756	0.020042		0.00150831		327	333	0.0135206	0.016699	0.0291851	0.0167269	0.0128279	0.0101774	0.0118674	0.0122928	0.0096194	0.0173547		-0.0820448	-0.0922194	-0.0283925	0.127654	0.120252		-1.39954	-1.29947	-0.258815	1.90978
334	349		1855.97	14	10.82-10.88	0.0907114	0.134658	0.192424	0.315385	0.485849		0.0777696	0.144058	0.209105	0.321021	0.473703	334	349	0.0129418	-0.00940032	-0.016681	-0.00563603	0.0121456		-0.00132599		334	349	0.0169948	0.00732164	0.0178562	0.00882623	0.00627388	0.0206774	0.0117926	0.00819979	0.015767	0.00568262		0.181185	-0.131604	-0.233534	-0.0789045	0.170039		0.837499	-1.17299	-1.47043	-0.540248
334	351		2098.1	16	12.18-12.26	0.0505489	0.100561	0.143008	0.285018	0.464013		0.0618508	0.0965398	0.15368	0.28236	0.467564	334	351	-0.011302	0.00402146	-0.0106717	0.00265765	-0.00355159		-0.00376924		334	351	0.016713	0.0174653	0.0246045	0.0176192	0.0153226	0.0309684	0.0188909	0.0179901	0.0207139	0.0219785		-0.180831	0.0643433	-0.170748	0.0425224	-0.0568254		-0.556276	0.270737	-0.606432	0.169273
337	351		1753.91	13	12.62-12.67	0.0534262	0.0979414	0.144423	0.234748	0.362926		0.0491984	0.0921608	0.144295	0.225492	0.358812	337	351	0.00422778	0.0057806	0.000128358	0.0092558	0.00411401		0.00470131		337	351	0.00288117	2.61049e-14	2.61049e-14	0.000306544	2.61049e-14	0.00756452	0.00519116	0.0102946	0.00805763	0.0117784		0.0549612	0.0751478	0.00166866	0.120325	0.0534821		0.90464	1.92872	0.0215961	1.98817
338	355		2139.12	16	11.94-11.99	0.162634	0.208143	0.223491	0.270423	0.343263		0.16146	0.211948	0.227164	0.27241	0.345226	338	355	0.00117388	-0.00380494	-0.00367285	-0.00198694	-0.00196362		-0.0020509		338	355	0.0190291	0.0181215	0.0226862	0.0210452	0.0238676	0.0167906	0.0179333	0.0222773	0.0244715	0.0295987		0.0187821	-0.0608791	-0.0587657	-0.031791	-0.0314179		0.0801182	-0.258496	-0.200079	-0.106626
340	356		1967.1	15	7.14-7.17	0.269188	0.353339	0.420621	0.556327	0.643098		0.281604	0.353301	0.428267	0.554882	0.654551	340	356	-0.0124159	3.81095e-05	-0.00764657	0.00144498	-0.0114523		-0.00600635		340	356	0.0288971	0.0274826	0.0343855	0.0280338	0.0271644	0.034221	0.0326368	0.031437	0.0143762	0.0277517		-0.186239	0.000571642	-0.114699	0.0216746	-0.171785		-0.480133	0.00154705	-0.284271	0.0794402
352	364		1517.77	11	10.65-10.71	0.0930845	0.150461	0.223039	0.306466	0.440131		0.0952088	0.157018	0.230652	0.321468	0.431794	352	364	-0.00212429	-0.00655658	-0.00761262	-0.0150027	0.00833691		-0.00459186		352	364	0.0106863	0.00823664	0.0220729	0.00999647	0.00508263	0.00334016	0.0140991	0.00286635	0.00962103	0		-0.0233672	-0.0721224	-0.0837388	-0.16503	0.091706		-0.328629	-0.695484	-0.592386	-1.87293
365	384		2346.27	18	8.86-8.98	0.0894187	0.130059	0.133877	0.17483	0.222832		0.0966655	0.135465	0.155181	0.190724	0.223115	365	384	-0.00724677	-0.0054058	-0.0213044	-0.0158935	-0.000282587		-0.0100266		365	384	0.00547231	0.0138986	0.0159179	0.00179652	0.0108323	0.0134774	0.00160456	0.00867463	0.0035607	0.0139559		-0.130442	-0.0973045	-0.383479	-0.286084	-0.00508657		-0.862903	-0.66923	-2.03553	-6.9024
368	384		1991.06	15	7.67-7.87	0.092502	0.134671	0.145076	0.166881	0.221157		0.100895	0.134002	0.142142	0.174998	0.222194	368	384	-0.00839303	0.000668358	0.00293383	-0.00811711	-0.00103652		-0.0027889		368	384	0.0088204	0.00827323	0.0104881	0.00769085	0.00934378	0.00714955	0.00762299	0.00925761	0.00697194	0.00891303		-0.125896	0.0100254	0.0440075	-0.121757	-0.0155478		-1.28035	0.102903	0.363243	-1.35438
376	393		2159.17	17	9.80-9.90	0.237873	0.395723	0.463029	0.509199	0.518642		0.260645	0.413582	0.47547	0.512711	0.526916	376	393	-0.0227713	-0.017859	-0.0124405	-0.00351185	-0.00827349		-0.0129712		376	393	0.0166939	0.00920465	0.0125295	0.0116172	0.00730658	0.0199448	0.00802897	0.0117684	0.00375382	0.00139912		-0.387112	-0.303603	-0.211488	-0.0597015	-0.140649		-1.51643	-2.53249	-1.25352	-0.49823
383	391		1117.52	8	4.95-4.97	0.105424	0.19658	0.262383	0.324932	0.407399		0.110324	0.187383	0.246706	0.306131	0.366851	383	391	-0.00489925	0.00919683	0.0156778	0.0188015	0.0405478		0.0158649		383	391	0.00363134	0.00767873	0.00518638	0.016566	0.0152996	0.0082959	0.0128834	0.00544515	0.0212625	0.0157198		-0.039194	0.0735746	0.125422	0.150412	0.324382		-0.937046	1.06209	3.61107	1.20817
385	392		961.422	7	7.02-7.06	0.0757203	0.141104	0.172306	0.234334	0.312949		0.0758465	0.141514	0.162217	0.218668	0.290396	385	392	-0.000126226	-0.000409808	0.0100891	0.0156659	0.0225531		0.00955441		385	392	0.0118047	0.00204264	0.00528571	0.0033162	0.0111576	0.00966951	0.00577186	0.00784606	0.00845309	0.0186435		-0.000883582	-0.00286866	0.0706239	0.109661	0.157872		-0.0143275	-0.115932	1.84716	2.98824
399	408		1224.66	9	10.42-10.54	0.118505	0.178033	0.20016	0.188668	0.184606		0.119887	0.181623	0.195703	0.228108	0.164752	399	408	-0.00138242	-0.00358955	0.00445688	-0.03944	0.0198544		-0.00402013		399	408	0.0185798	0.00161294	0.0191221	0.0200763	0.0218796	0.0177199	0.00535191	0.0189093	0.0313697	0.032091		-0.0124418	-0.032306	0.0401119	-0.35496	0.17869		-0.0932592	-1.11228	0.287051	-1.83418
409	428		2177.06	18	6.49-6.52	0.401371	0.474967	0.511614	0.564929	0.578453		0.416451	0.474263	0.502258	0.561501	0.574242	409	428	-0.0150804	0.000703566	0.00935614	0.00342769	0.00421053		0.000523499		409	428	0.0128817	0.00720207	0.0107288	0.00923566	0.0101713	0.0144945	0.00735323	0.0087665	0.00624096	0.0117521		-0.271448	0.0126642	0.16841	0.0616985	0.0757896		-1.34699	0.118396	1.16964	0.532623
438	444		749.331	6	5.15-5.17	0.0256876	0.0323886	0.0365104	0.0386214	0.0418893		0.0327642	0.0304803	0.0414025	0.0419037	0.0404284	438	444	-0.00707662	0.00190821	-0.00489204	-0.00328234	0.00146095		-0.00237637		438	444	0.0105092	0.00798184	0.00983831	0.00925572	0.00839527	0.00719801	0.00752637	0.00824701	0.00845373	0.00536891		-0.0424597	0.0114493	-0.0293522	-0.019694	0.00876567		-0.962249	0.301268	-0.660032	-0.453533
445	470		2647.38	19	8.46-8.51	0.62173	0.655584	0.661293	0.67371	0.682486		0.648915	0.663165	0.662028	0.67856	0.663692	445	470	-0.0271852	-0.00758146	-0.000735114	-0.00484996	0.0187941		-0.00431153		445	470	0.0118584	0.00398759	0.0117482	0.00904289	0.0145099	0.00841147	0.0045945	0.00641681	0.0197469	0.0102282		-0.516519	-0.144048	-0.0139672	-0.0921493	0.357088		-3.23867	-2.1585	-0.0951158	-0.386776
471	477		821.371	6	8.33-8.37	0.0879978	0.130881	0.136621	0.177172	0.335186		0.0741595	0.127238	0.148629	0.192628	0.328475	471	477	0.0138383	0.00364229	-0.0120075	-0.0154565	0.0067107		-0.000654527		471	477	0.00898507	0.00463433	0.00624055	0.00229826	0.00360697	0.013758	0.00587662	0.00081592	0.00330025	0.00418358		0.0830299	0.0218537	-0.0720448	-0.0927388	0.0402642		1.45865	0.842938	-3.30452	-6.65682
471	489		2155.09	18	11.94-11.99	0.13918	0.188488	0.193009	0.243582	0.31049		0.135408	0.186851	0.196874	0.245472	0.302859	471	489	0.00377222	0.00163748	-0.00386459	-0.00189022	0.00763101		0.00145718		471	489	0.0121854	0.00841302	0.00852222	0.00963939	0.00878831	0.0139373	0.0105483	0.00937803	0.0102325	0.00985796		0.0679	0.0294746	-0.0695627	-0.0340239	0.137358		0.352923	0.210206	-0.528232	-0.232892
478	489		1352.74	11	8.90-8.99	0.0503852	0.0984282	0.129075	0.193373	0.255241		0.0489921	0.108525	0.138132	0.206484	0.268954	478	489	0.00139308	-0.0100965	-0.00905672	-0.0131109	-0.013713		-0.0089168		478	489	0.0126868	0.0107179	0.0119095	0.0107014	0.0149491	0.0088365	0.0118304	0.0134693	0.020021	0.0138708		0.0153239	-0.111061	-0.0996239	-0.144219	-0.150843		0.156064	-1.09548	-0.872481	-1.00031
480	489		1092.58	9	5.81-5.86	0.0928224	0.148642	0.176753	0.244287	0.316759		0.104118	0.158876	0.192631	0.261477	0.322317	480	489	-0.0112957	-0.0102337	-0.0158776	-0.0171899	-0.00555738		-0.0120308		480	489	0.00725638	0.0182232	0.0174673	0.0117163	0.0116657	0.0138255	0.0130826	0.0118829	0.0094539	0.0105119		-0.101661	-0.092103	-0.142899	-0.154709	-0.0500164		-1.25301	-0.790141	-1.30175	-1.97769
482	489		892.467	7	5.21-5.25	0.140022	0.215888	0.238276	0.324036	0.389945		0.139565	0.22088	0.245967	0.317282	0.366731	482	489	0.000457143	-0.00499147	-0.00769104	0.00675352	0.0232143		0.00354849		482	489	0.0176292	0.0180166	0.0163162	0.0292746	0.0295273	0.0158275	0.0223194	0.0201079	0.0215386	0.0285004		0.0032	-0.0349403	-0.0538373	0.0472746	0.1625		0.0334207	-0.301407	-0.514436	0.32185
485	495		1372.69	10	10.53-10.70	0.0167176	0.0174099	0.0318064	0.0691894	0.291613		0.0323994	0.0194936	0.0311299	0.0461497	0.280029	485	495	-0.0156818	-0.00208373	0.000676567	0.0230397	0.0115839		0.00350693		485	495	0.00680328	0.00943015	0.013773	0.00290627	0.0133534	0.00142522	0.0127342	0.00411358	0.00517448	0.00643075		-0.156818	-0.0208373	0.00676567	0.230397	0.115839		-3.90761	-0.227767	0.0815246	6.72408
500	513		1692.71	12	12.35-12.37	0.744967	0.760534	0.806286	0.796495	0.815569		0.744249	0.764936	0.76671	0.798596	0.834257	500	513	0.000718284	-0.00440162	0.0395761	-0.00210112	-0.0186878		0.00302077		500	513	0.0384291	0.0113165	0.0132427	0.00957786	0.00873433	0.00275622	0.0120086	0.0092342	0.0260442	0.0124776		0.0086194	-0.0528194	0.474913	-0.0252134	-0.224254		0.032291	-0.462033	4.24595	-0.131146
501	517		2123.88	15	6.37-6.42	0.188577	0.314891	0.359972	0.386776	0.434013		0.183255	0.342606	0.352845	0.400624	0.426733	501	517	0.00532239	-0.0277154	0.00712726	-0.0138479	0.0072803		-0.00436667		501	517	0.0171056	0.0237697	0.0204346	0.0231993	0.0166199	0.0178549	0.0316237	0.0119021	0.0128418	0.0187054		0.0798358	-0.415731	0.106909	-0.207718	0.109204		0.372825	-1.21344	0.52202	-0.904542
503	515		1597.72	11	4.79-4.80	0.269704	0.429922	0.461155	0.543592	0.568636		0.243696	0.445492	0.473016	0.510077	0.560414	503	515	0.0260085	-0.0155692	-0.0118605	0.0335144	0.00822239		0.00806312		503	515	0.0204693	0.0182887	0.027006	0.0165551	0.0165391	0.032187	0.0213594	0.0115328	0.0144247	0.0119526		0.286094	-0.171261	-0.130466	0.368658	0.0904463		1.18099	-0.959003	-0.699565	2.64365
521	529		1121.62	8	9.45-9.57	0.0236412	0.0256912	0.0272149	0.060295	0.324599		0.0235373	0.023794	0.0260409	0.0590588	0.310694	521	529	0.000103918	0.0018972	0.00117407	0.00123619	0.0139056		0.0036634		521	529	0.00598582	0.00653265	0.00483806	0.00741231	0.00416754	0.00831978	0.0114504	0.00853358	0.00774403	0.0112966		0.000831343	0.0151776	0.00939254	0.00988955	0.111245		0.0175613	0.249268	0.207301	0.199739
529	541		1488.87	12	8.27-8.41	0.207391	0.426388	0.533363	0.606397	0.660541		0.220516	0.426832	0.543091	0.603868	0.636251	529	541	-0.0131256	-0.00044403	-0.00972724	0.00252811	0.0242897		0.000704179		529	541	0.0165746	0.0252699	0.0259985	0.0168626	0.0136267	0.0341391	0.0215874	0.0147502	0.0201285	0.0418277		-0.157507	-0.00532836	-0.116727	0.0303373	0.291476		-0.59906	-0.0231405	-0.563644	0.166759
530	537		888.526	7	4.92-4.96	0.173451	0.367491	0.426445	0.438325	0.443018		0.173259	0.34798	0.409306	0.410756	0.409381	530	537	0.000191898	0.0195109	0.0171397	0.0275693	0.0336377		0.0196099		530	537	0.0229844	0.0198544	0.0216859	0.0283324	0.0255301	0.0140902	0.0164452	0.0255991	0.0327471	0.0277738		0.00134328	0.136576	0.119978	0.192985	0.235464		0.0123287	1.31082	0.884854	1.10274
532	559		3211.79	27	11.16-11.51	0.054048	0.116838	0.182104	0.271143	0.421915		0.0595405	0.11321	0.169255	0.282598	0.414858	532	559	-0.00549254	0.00362775	0.0128496	-0.0114558	0.00705688		0.00131719		532	559	0.00642161	0.00477313	0.0130802	0.00649281	0.004389	0.00498353	0.0147522	0.0194787	0.0144207	0.0210104		-0.148299	0.0979493	0.34694	-0.309306	0.190536		-1.17037	0.405248	0.948567	-1.25463
535	542		973.597	7	9.09-9.21	0.151561	0.415133	0.52295	0.623752	0.71566		0.183886	0.425655	0.526145	0.624792	0.697953	535	542	-0.0323243	-0.0105217	-0.00319467	-0.00104009	0.0177072		-0.00587471		535	542	0.0309552	0.0261213	0.0154011	0.0112785	0.0113463	0.0169772	0.00630597	0.015065	0.00530832	0.00921173		-0.22627	-0.0736522	-0.0223627	-0.0072806	0.123951		-1.58581	-0.678193	-0.256837	-0.14452
543	552		1148.61	9	10.10-10.16	0.0242189	0.0278745	0.0373489	0.0861791	0.164118		0.0232547	0.0291559	0.0420124	0.0952789	0.164227	543	552	0.000964179	-0.00128143	-0.00466352	-0.00909983	-0.000109453		-0.00283801		543	552	0.00901642	0.00677247	0.00590763	0.00505837	0.00331376	0.00165191	0.00564362	0.00723367	0.00769287	0.00631393		0.00867761	-0.0115328	-0.0419716	-0.0818985	-0.000985075		0.182186	-0.251766	-0.864871	-1.71191
549	555		851.51	6	8.37-8.46	-0.00556667	0.00320945	0.0072801	0.0161873	0.0683326		0.0122928	0.00736294	0.004249	0.0352871	0.0908323	549	555	-0.0178595	-0.00415348	0.00303109	-0.0190998	-0.0224998		-0.0121163		549	555	0.0110547	0.0112709	0.0175547	0.00820448	0.0200326	0.0108983	0.0139413	0.0124027	0.00677239	0.0132388		-0.107157	-0.0249209	0.0181866	-0.114599	-0.134999		-1.99269	-0.401287	0.244254	-3.10961
558	573		1913.08	15	4.46-4.53	0.161662	0.29794	0.335227	0.426951	0.422039		0.152687	0.267181	0.304406	0.391711	0.386928	558	573	0.00897453	0.0307585	0.0308213	0.0352408	0.0351101		0.0281811		558	573	0.0158162	0.0197672	0.0266565	0.012088	0.0163053	0.00170746	0.0190574	0.0138024	0.0413512	0.001441		0.134618	0.461378	0.462319	0.528612	0.526652		0.977132	1.94027	1.77841	1.41681
575	586		1304.65	11	8.75-8.82	0.230641	0.342036	0.372198	0.448205	0.525064		0.242399	0.343855	0.382078	0.457291	0.522947	575	586	-0.0117583	-0.001819	-0.00987978	-0.00908548	0.00211642		-0.00608524		575	586	0.0125217	0.0112402	0.0160794	0.00851085	0.01143	0.0101593	0.000861737	0.0104433	0.00461818	0		-0.129342	-0.020009	-0.108678	-0.0999403	0.0232806		-1.26304	-0.279478	-0.892514	-1.62515
585	597		1434.81	9	11.42-11.51	0.094663	0.100734	0.136662	0.148759	0.281112		0.0946119	0.115437	0.114584	0.143239	0.24625	585	597	5.10779e-05	-0.0147036	0.0220779	0.00552023	0.0348615		0.00956143		585	597	0.00869353	0.0184892	0.00992604	0.00669287	0.00958955	0.014368	0.0244556	0.0183887	0.0115161	0.0229075		0.000459701	-0.132333	0.198701	0.0496821	0.313754		0.00526813	-0.83069	1.82996	0.717833
591	611		2298.38	16	11.57-11.63	0.0558731	0.246906	0.458366	0.688997	0.784661		0.0509063	0.237139	0.460375	0.698045	0.784201	591	611	0.00496679	0.00976632	-0.00200858	-0.00904785	0.000460168		0.000827369		591	611	0.00873853	0.00494049	0.00527649	0.0115584	0.00925075	0.00493815	0.00979226	0.00617687	0.0058486	0.0097931		0.0794687	0.156261	-0.0321373	-0.144766	0.00736269		0.857077	1.54229	-0.428247	-1.20978
592	611		2185.3	15	12.55-12.61	0.0741505	0.271663	0.49583	0.744164	0.84029		0.0816996	0.270926	0.49899	0.75447	0.842243	592	611	-0.00754905	0.000736716	-0.0031607	-0.010306	-0.00195363		-0.00444653		592	611	0.00735284	0.00991731	0.00823632	0.00559284	0.00557323	4.45771e-05	0.0134278	0.00703284	0.00226905	0.00494219		-0.113236	0.0110507	-0.0474104	-0.15459	-0.0293045		-1.77824	0.0764408	-0.505474	-2.95753
612	621		1105.61	8	10.48-10.54	0.185029	0.301891	0.420477	0.525609	0.64309		0.195756	0.321157	0.417575	0.534955	0.626243	612	621	-0.0107269	-0.0192666	0.00290205	-0.00934608	0.016847		-0.0039181		612	621	0.00491772	0.00669981	0.00702705	0.00348694	0.0104459	0.00199422	0.0166841	0.00968694	0.00699907	0.00476828		-0.0858149	-0.154133	0.0232164	-0.0747687	0.134776		-3.50115	-1.85608	0.42002	-2.07018
617	635		2188.11	16	9.27-9.35	0.212697	0.34291	0.44756	0.48849	0.510813		0.230175	0.357575	0.433192	0.493178	0.529649	617	635	-0.0174774	-0.0146655	0.0143674	-0.00468797	-0.0188358		-0.00825987		617	635	0.0102372	0.0123201	0.00386576	0.0166196	0.0327664	0.0157846	0.00297127	0.0154354	0.0316386	0.00531259		-0.279639	-0.234648	0.229878	-0.0750075	-0.301373		-1.60903	-2.00431	1.5639	-0.227203
620	626		912.482	6	10.31-10.34	0.0983766	0.117141	0.146713	0.239028	0.385298		0.134421	0.119156	0.152602	0.24343	0.380515	620	626	-0.0360443	-0.00201493	-0.00588905	-0.00440249	0.00478308		-0.00871353		620	626	0.00434055	0.0219958	0.00990672	0.00409254	0.00439279	0.036992	0.00710572	0.00760697	0.00543881	0.00215075		-0.216266	-0.0120896	-0.0353343	-0.0264149	0.0286985		-1.67618	-0.150982	-0.816642	-1.12029
622	641		2313.16	18	9.56-9.72	0.0822522	0.12632	0.158158	0.222981	0.284524		0.093213	0.115741	0.15561	0.214445	0.256536	622	641	-0.0109608	0.0105799	0.00254784	0.00853574	0.0279877		0.00773808		622	641	0.0103942	0.00239834	0.0218325	0.0139618	0.00976144	0.00819179	0.0114153	0.00504254	0.0114863	0.00649561		-0.197294	0.190437	0.0458612	0.153643	0.503779		-1.43451	1.57099	0.196945	0.817742
632	641		1140.6	8	8.69-8.77	0.0328519	0.0463349	0.0313444	0.0583978	0.124223		0.0198664	0.0386509	0.0367715	0.0498604	0.126678	632	641	0.0129854	0.00768396	-0.00542705	0.00853731	-0.00245485		0.00426496		632	641	0.0097166	0.00722108	0.0111019	0.0231125	0.0141597	0.0164849	0.00909254	0.00730896	0.0112468	0.0272584		0.103884	0.0614716	-0.0434164	0.0682985	-0.0196388		1.17538	1.14623	-0.707197	0.57529
632	645		1667.85	12	7.38-7.44	0.0622961	0.0948724	0.122471	0.155222	0.254288		0.0516097	0.0891484	0.104761	0.159229	0.232685	632	645	0.0106864	0.005724	0.0177098	-0.00400759	0.021603		0.0103431		632	645	0.0179842	0.0177847	0.0202433	0.0166745	0.0219692	0.0170271	0.0182769	0.0175835	0.025034	0.029348		0.128237	0.0686881	0.212518	-0.048091	0.259236		0.747374	0.388768	1.14398	-0.230772
632	648		2007.1	15	10.47-10.59	0.030745	0.053115	0.0638902	0.0813881	0.174234		0.0266071	0.0507488	0.0681143	0.100733	0.162442	632	648	0.00413791	0.00236627	-0.00422408	-0.0193448	0.0117921		-0.00105451		632	648	0.00441592	0.00480607	0.0092401	0.019762	0.00320289	0.00210826	0.00677005	0.00525602	0.0103711	0.0115564		0.0620687	0.035494	-0.0633612	-0.290172	0.176882		1.46465	0.493645	-0.688246	-1.5013
642	648		885.515	6	10.16-10.24	0.0140619	0.0221838	0.0325331	0.0361361	0.0598005		0.00748234	0.0267376	0.039891	0.0344537	0.0501296	642	648	0.0065796	-0.00455373	-0.00735796	0.00168234	0.0096709		0.00120423		642	648	0.0204122	0.0262838	0.0172647	0.0173669	0.016992	0.02575	0.0277818	0.0185619	0.0169602	0.0194532		0.0394776	-0.0273224	-0.0441478	0.010094	0.0580254		0.34682	-0.206231	-0.502739	0.120039
647	653		799.529	6	12.97-12.99	-0.000731343	0.00470821	-0.00242214	0.00255174	0.00738806		0.00289179	0.00188035	0.00371045	0.00033209	0.00680199	647	653	-0.00362313	0.00282786	-0.00613259	0.00221965	0.00058607		-0.000824428		647	653	0.0115565	0.0128082	0.0137122	0.0114341	0.0137256	0.010654	0.0139378	0.0109328	0.01151	0.0146353		-0.0217388	0.0169672	-0.0367955	0.0133179	0.00351642		-0.39925	0.258754	-0.605684	0.236967
653	664		1487.83	11	8.77-8.87	0.00192212	0.0229548	0.0565528	0.10099	0.226324		0.0183502	0.029828	0.0467197	0.108509	0.211296	653	664	-0.0164281	-0.00687313	0.00983311	-0.007519	0.0150277		-0.00119189		653	664	0.00707761	0.00722415	0.004481	0.0232669	0.00360461	0.012881	0.015138	0.00572429	0.00610244	0.00530027		-0.180709	-0.0756045	0.108164	-0.082709	0.165304		-1.93601	-0.709732	2.34284	-0.541422
657	664		1000.58	7	8.03-8.11	0.0327183	0.0650254	0.104758	0.172497	0.331287		0.0320203	0.0605183	0.0917068	0.19144	0.329376	657	664	0.000698081	0.00450704	0.0130507	-0.0189429	0.00191109		0.000244819		657	664	0.0114974	0.0124196	0.021851	0.0219846	0.0089032	0.0103736	0.0145128	0.0117765	0.0125369	0.00780768		0.00488657	0.0315493	0.0913552	-0.1326	0.0133776		0.0780801	0.40868	0.910652	-1.29642
672	690		2090.11	17	5.21-5.24	0.0332231	0.0608898	0.0872072	0.123878	0.139265		0.0505874	0.0556134	0.0959636	0.132671	0.129145	672	690	-0.0173643	0.00527638	-0.00875637	-0.00879245	0.01012		-0.00390334		672	690	0.0162842	0.0113403	0.0127621	0.0124133	0.0146775	0.0140291	0.015904	0.0137151	0.0148639	0.0216277		-0.295193	0.0896985	-0.148858	-0.149472	0.17204		-1.39927	0.467871	-0.809556	-0.786392
685	692		842.462	6	7.43-7.45	0.0642475	0.163316	0.171135	0.19251	0.318289		0.0841303	0.158189	0.172579	0.200788	0.311599	685	692	-0.0198828	0.00512637	-0.00144403	-0.00827761	0.0066898		-0.00355766		685	692	0.0214475	0.00446567	0.00655672	0.006401	0.00232687	0.009599	0.00484328	0.0120515	0.00152786	0.0018194		-0.119297	0.0307582	-0.00866418	-0.0496657	0.0401388		-1.4656	1.34781	-0.182303	-2.17864
690	706		1953.01	16	11.83-11.87	0.125608	0.166843	0.186811	0.235678	0.303446		0.119838	0.164927	0.187862	0.234032	0.293696	690	706	0.00577034	0.00191651	-0.00105056	0.00164543	0.00974944		0.00360623		690	706	0.00377146	0.00270905	0.00195802	0.00701465	0.00206894	0.0135473	0.00246763	0.000548601	0.00258293	0.00792136		0.0923254	0.0306642	-0.016809	0.0263269	0.155991		0.710723	0.905866	-0.894856	0.381263
693	703		1222.6	10	10.56-10.58	0.0508958	0.12856	0.242662	0.41493	0.511659		0.049189	0.134897	0.247877	0.416205	0.506244	693	703	0.00170687	-0.00633731	-0.00521463	-0.00127493	0.00541493		-0.00114101		693	703	0.00196642	0.00785284	0.00827313	0.00153746	0.0120087	0.00132612	0.00632657	0.00565358	0.0114051	0.012583		0.0170687	-0.0633731	-0.0521463	-0.0127493	0.0541493		1.24648	-1.08848	-0.901364	-0.191883
704	718		1636.81	12	7.01-7.05	0.179572	0.244343	0.28622	0.376611	0.439837		0.199414	0.246322	0.277011	0.368737	0.430373	704	718	-0.0198414	-0.00197873	0.00920896	0.0078745	0.00946393		0.000945448		704	718	0.0134888	0.00474838	0.0062541	0.00907164	0.0042357	0.00528209	0.00820858	0.00546716	0.00210597	0.00921356		-0.238097	-0.0237448	0.110507	0.094494	0.113567		-2.37236	-0.36141	1.92015	1.46453
704	720		1836.89	14	7.23-7.28	0.236693	0.325266	0.351795	0.44352	0.494996		0.254272	0.313807	0.346849	0.44484	0.500444	704	720	-0.0175787	0.0114591	0.00494574	-0.00132004	-0.00544733		-0.00158825		704	720	0.0142351	0.0146208	0.00571525	0.0100398	0.00860405	0.0111707	0.00811983	0.0137966	0.00372164	0.027606		-0.246101	0.160427	0.0692403	-0.0184806	-0.0762627		-1.68265	1.18676	0.573627	-0.213534
712	721		957.464	8	7.20-7.26	0.206231	0.301416	0.35141	0.411635	0.43872		0.208111	0.316708	0.344426	0.428597	0.420649	712	721	-0.00188022	-0.0152918	0.00698489	-0.0169623	0.0180713		-0.00181563		712	721	0.0165912	0.00685989	0.00252071	0.0271368	0.00708022	0.0099097	0.0050681	0.0251591	0.0115278	0.0098431		-0.0150418	-0.122334	0.0558791	-0.135699	0.14457		-0.168516	-3.10543	0.478471	-0.996466
725	731		727.344	6	5.15-5.16	0.0363505	0.0352132	0.053744	0.038499	0.0466754		0.0302958	0.0301259	0.048245	0.0456005	0.0494154	725	731	0.00605473	0.00508731	0.005499	-0.00710149	-0.00274005		0.0013599		725	731	0.015299	0.0192017	0.0200878	0.023909	0.0161164	0.0200721	0.0204127	0.023451	0.0205607	0.0206886		0.0363284	0.0305239	0.032994	-0.042609	-0.0164403		0.41553	0.314418	0.308455	-0.390062
725	732		890.408	7	7.07-7.12	0.0375343	0.0205083	0.0268188	0.037191	0.0354546		0.0417938	0.0507834	0.0302126	0.0539629	0.0496262	725	732	-0.00425949	-0.0302751	-0.00339382	-0.0167719	-0.0141716		-0.0137744		725	732	0.016494	0.0178768	0.0183855	0.019113	0.0194844	0.01448	0.0236817	0.0188497	0.0186429	0.0194079		-0.0298164	-0.211925	-0.0237567	-0.117403	-0.0992015		-0.33614	-1.76728	-0.223242	-1.08802
733	749		1900.99	16	12.90-13.03	0.0682403	0.08276	0.102539	0.114484	0.233538		0.0630162	0.0752373	0.0911048	0.11708	0.231925	733	749	0.00522407	0.00752267	0.011434	-0.00259646	0.00161353		0.00463957		733	749	0.0169811	0.0103257	0.00495672	0.0022805	0.00199496	0.00872584	0.0223911	0.00854506	0.00578433	0.00480299		0.0835851	0.120363	0.182945	-0.0415433	0.0258164		0.473939	0.528429	2.00477	-0.723295
737	750		1597.87	13	11.38-11.49	0.0475532	0.0632524	0.0717581	0.089715	0.184825		0.0559125	0.0561204	0.0680124	0.0945613	0.175775	737	750	-0.00835936	0.00713192	0.00374569	-0.00484627	0.00905098		0.00134459		737	750	0.0162409	0.00705132	0.00639897	0.00836682	0.0108549	0.00848634	0.00900551	0.0107506	0.00570218	0.00737233		-0.108672	0.0927149	0.048694	-0.0630015	0.117663		-0.790139	1.08001	0.518566	-0.829024
737	751		1710.95	14	12.16-12.29	0.0428449	0.0628152	0.0714626	0.0953567	0.185263		0.0531006	0.0677725	0.0782548	0.10309	0.180065	737	751	-0.0102558	-0.00495725	-0.00679222	-0.00773348	0.00519787		-0.00490817		737	751	0.0115726	0.00569254	0.00653646	0.00839648	0.00791493	0.0043936	0.00673742	0.00810917	0.00889072	0.0174195		-0.143581	-0.0694015	-0.095091	-0.108269	0.0727701		-1.43502	-0.973459	-1.12951	-1.09534
738	750		1434.81	12	10.86-10.99	0.0342341	0.0546541	0.0724612	0.0882966	0.192928		0.0592954	0.0748874	0.0805728	0.108093	0.194791	738	750	-0.0250613	-0.0202333	-0.00811157	-0.0197966	-0.00186318		-0.0150132		738	750	0.0114511	0.00182612	0.0130745	0.00889154	0.0124903	0.00525522	0.00884415	0.00907724	0.00233843	0.0072148		-0.300736	-0.2428	-0.0973388	-0.23756	-0.0223582		-3.4452	-3.88066	-0.882703	-3.72952
738	751		1547.89	13	11.73-11.87	0.0528301	0.0701769	0.0760039	0.0976665	0.189091		0.0505569	0.0726597	0.0710832	0.0984418	0.168918	738	751	0.00227313	-0.00248278	0.00492067	-0.000775316	0.020173		0.00482175		738	751	0.00806705	0.00755454	0.0102762	0.00703192	0.0119187	0.010196	0.0268129	0.0174381	0.0171788	0.0141952		0.0295507	-0.0322761	0.0639687	-0.0100791	0.262249		0.302829	-0.154372	0.421073	-0.072345
750	763		1589.9	13	10.16-10.24	0.107007	0.165047	0.207699	0.28856	0.44029		0.105916	0.164493	0.215162	0.297412	0.448193	750	763	0.00109173	0.000554535	-0.0074628	-0.00885201	-0.00790276		-0.00451426		750	763	0.0112913	0.00565121	0.00985729	0.013638	0.00564615	0.00782273	0.0067535	0.00690287	0.00650827	0.00751171		0.0141925	0.00720896	-0.0970164	-0.115076	-0.102736		0.137659	0.109071	-1.07412	-1.01461
751	757		760.493	6	5.44-5.48	0.122056	0.173271	0.177357	0.177918	0.175883		0.118482	0.150606	0.143439	0.154623	0.15742	751	757	0.00357438	0.0226642	0.0339184	0.0232948	0.0184632		0.020383		751	757	0.00482488	0.00509328	0.011954	0.00363731	0.0103657	0.00920522	0.0121515	0.00338358	0.00590945	0.00611169		0.0214463	0.135985	0.20351	0.139769	0.110779		0.595687	2.97938	4.72877	5.81451
751	762		1419.8	11	10.53-10.70	0.0156251	0.0627282	0.0525045	0.0749723	0.101565		0.0270296	0.0548619	0.0615993	0.0685832	0.0861805	751	762	-0.0114045	0.00786635	-0.00909484	0.00638915	0.0153843		0.00182809		751	762	0.0153647	0.00886608	0.0122889	0.00278385	0.00897436	0.00438277	0.00476798	0.00279077	0.00670706	0.00176567		-0.125449	0.0865299	-0.100043	0.0702806	0.169227		-1.2363	1.35345	-1.25004	1.5239
751	763		1476.82	12	10.21-10.34	0.0151724	0.0352204	0.0439141	0.0941408	0.143665		0.0226345	0.0393853	0.0410978	0.0910553	0.128762	751	763	-0.00746206	-0.00416493	0.00281629	0.00308545	0.0149036		0.00183567		751	763	0.0179165	0.00567363	0.00787388	0.0139999	0.00518271	0.00050908	0.00691692	0.0156761	0.00741965	0.00664415		-0.0895448	-0.0499791	0.0337955	0.0370254	0.178843		-0.721091	-0.806364	0.278066	0.337288
763	779		1892.08	11	9.60-9.69	0.105722	0.177633	0.283077	0.458487	0.635862		0.0987457	0.172822	0.290791	0.472738	0.611155	763	779	0.00697585	0.00481072	-0.00771384	-0.0142507	0.0247061		0.00290562		763	779	0.00612917	0.0158813	0.0225145	0.0137037	0.0136406	0.0156967	0.00621588	0.00427422	0.00227761	0.0124008		0.0767343	0.0529179	-0.0848522	-0.156758	0.271767		0.717023	0.488579	-0.583016	-1.77682
764	771		961.547	6	6.59-6.65	0.192482	0.314203	0.346341	0.461121	0.621349		0.183981	0.303026	0.33733	0.463854	0.623895	764	771	0.00850025	0.0111769	0.00901095	-0.00273358	-0.00254527		0.00468184		764	771	0.0304229	0.00695423	0.00892512	0.0155669	0.01059	0.0417577	0.00581617	0.0203356	0.0243346	0.0211789		0.0510015	0.0670612	0.0540657	-0.0164015	-0.0152716		0.284969	2.13537	0.702785	-0.1639
776	786		1275.64	9	7.39-7.44	0.218409	0.300388	0.366391	0.453442	0.47955		0.234549	0.311245	0.381434	0.47525	0.495858	776	786	-0.0161401	-0.0108566	-0.0150431	-0.0218085	-0.0163071		-0.0160311		776	786	0.00530746	0.00800929	0.0224546	0.0081864	0.00313433	0.0167406	0.00754279	0.00578939	0.00690896	0.00239519		-0.145261	-0.097709	-0.135388	-0.196276	-0.146764		-1.59183	-1.70916	-1.12362	-3.52621
780	794		1624.69	14	7.23-7.26	0.214587	0.290462	0.346379	0.386104	0.469995		0.225033	0.286332	0.329074	0.376113	0.457472	780	794	-0.0104467	0.00413006	0.0173058	0.00999072	0.0125225		0.00670047		780	794	0.00805704	0.0149141	0.00855203	0.000742644	0.0084258	0.00129979	0.00162452	0.021034	0.0137551	0.00819936		-0.146254	0.0578209	0.242281	0.13987	0.175315		-2.2171	0.476826	1.32011	1.25621
780	797		2044.86	17	8.00-8.04	0.174973	0.239832	0.274493	0.319757	0.43502		0.170642	0.228834	0.268522	0.309366	0.420072	780	797	0.00433143	0.0109981	0.00597182	0.0103909	0.0149489		0.00932822		780	797	0.0117268	0.00262291	0.0191797	0.0102433	0.0288491	0.0134868	0.014663	0.0164752	0.0143167	0.0193416		0.0736343	0.186967	0.101521	0.176645	0.254131		0.419775	1.27883	0.409088	1.02237
809	824		1952.12	15	9.96-10.07	0.0271243	0.0365119	0.0259734	0.0309797	0.036762		0.0257352	0.0357378	0.0369974	0.0210619	0.0257465	809	824	0.00138905	0.000774129	-0.011024	0.00991781	0.0110155		0.00241451		809	824	0.00517711	0.00842716	0.0148867	0.00741393	0.0188279	0.00462985	0.00638627	0.00721323	0.00682378	0.00561065		0.0208358	0.0116119	-0.16536	0.148767	0.165233		0.346406	0.126809	-1.15427	1.70482
812	824		1526.83	12	8.28-8.43	0.175734	0.409248	0.485638	0.525571	0.603568		0.156975	0.394488	0.503686	0.560924	0.584685	812	824	0.0187585	0.01476	-0.0180481	-0.0353535	0.0188831		-0.000200025		812	824	0.00893072	0.0199398	0.026568	0.0220087	0.0210735	0.0207831	0.0279044	0.0314791	0.032329	0.0268558		0.225101	0.177119	-0.216578	-0.424242	0.226597		1.43632	0.745411	-0.758889	-1.56571
823	846		2714.44	21	10.00-10.08	0.0579775	0.124189	0.186925	0.284312	0.431004		0.0645606	0.126966	0.184846	0.290639	0.421386	823	846	-0.00658308	-0.00277655	0.00207939	-0.00632694	0.00961805		-0.000797825		823	846	0.00658465	0.00837861	0.0161542	0.0112721	0.0149193	0.00871187	0.0103104	0.0104615	0.0100041	0.00913397		-0.138245	-0.0583075	0.0436672	-0.132866	0.201979		-1.04413	-0.361981	0.187138	-0.727121
826	850		2866.6	22	10.80-11.07	0.0607492	0.118035	0.19213	0.271282	0.417913		0.0604523	0.113828	0.180366	0.246239	0.43715	826	850	0.000296879	0.00420739	0.0117634	0.0250432	-0.019237		0.00441479		826	850	0.00215299	0.00658636	0.0121153	0.000820488	0.0222296	0.000829376	0.00648982	0.00361052	0.0126742	0.0107161		0.00653134	0.0925627	0.258796	0.550951	-0.423213		0.222871	0.788126	1.6117	3.41524
851	862		1408.6	11	10.84-10.87	-0.00613365	0.0115324	0.0122581	0.0486452	0.134118		0.00342442	-0.00709389	0.022946	0.0671183	0.146108	851	862	-0.00955807	0.0186263	-0.0106879	-0.0184731	-0.0119898		-0.00641653		851	862	0.00780299	0.00777626	0.00589267	0.0173659	0.00923039	0.00612632	0.0178043	0.00845658	0.00342062	0.0176904		-0.105139	0.20489	-0.117567	-0.203204	-0.131888		-1.66876	1.66054	-1.79604	-1.80775
854	870		1941.94	16	7.88-7.94	0.0674639	0.0834171	0.0899167	0.205831	0.411253		0.0724133	0.0933105	0.0987989	0.20679	0.421093	854	870	-0.00494944	-0.00989347	-0.00888218	-0.000958675	-0.00983974		-0.0069047		854	870	0.0262805	0.00895224	0.0204403	0.0292162	0.0410329	0.0152223	0.0169992	0.0171714	0.0199979	0.0194369		-0.079191	-0.158296	-0.142115	-0.0153388	-0.157436		-0.282268	-0.891926	-0.576287	-0.0468997
855	877		2557.28	22	7.87-7.92	0.226742	0.232018	0.27186	0.35839	0.594847		0.236146	0.232869	0.264979	0.378048	0.604356	855	877	-0.00940353	-0.000851493	0.00688046	-0.0196581	-0.00950862		-0.00650825		855	877	0.0063479	0.00684071	0.026318	0.00826438	0.0068403	0.00585977	0.00697042	0.00702877	0.00656336	0.00609695		-0.206878	-0.0187328	0.15137	-0.432478	-0.20919		-1.88533	-0.151011	0.437487	-3.22628
864	870		770.368	6	8.30-8.36	0.0727488	0.179194	0.246935	0.361539	0.488955		0.0498005	0.180046	0.258435	0.381808	0.493244	864	870	0.0229483	-0.000851244	-0.0114995	-0.0202692	-0.00428856		-0.00279204		864	870	0.0128624	0.0241087	0.0179764	0.0388055	0.0387299	0.00829104	0.00811393	0.0222239	0.0148299	0.0216535		0.13769	-0.00510746	-0.068997	-0.121615	-0.0257313		2.59736	-0.0579616	-0.696811	-0.845089
864	871		917.436	7	11.16-11.21	0.0830503	0.249932	0.322322	0.416307	0.561757		0.0720559	0.239658	0.353123	0.440745	0.539358	864	871	0.0109945	0.0102746	-0.0308017	-0.024438	0.0223989		-0.00231433		864	871	0.0183269	0	0.0181183	0	0	0.00936055	0.00812985	0.0166386	0.0130776	0.0143868		0.0769612	0.0719224	-0.215612	-0.171066	0.156793		0.92536	2.18899	-2.16878	-3.23666
870	880		1254.72	10	10.22-10.50	0.0184836	0.0529437	0.0695709	0.0936181	0.138939		0.0419927	0.0634907	0.0616342	0.0981916	0.10265	870	880	-0.0235091	-0.010547	0.00793672	-0.00457358	0.0362888		0.00111916		870	880	0.010391	0.00158179	0.00497851	0.00968821	0.00425672	0.00408433	0.0078297	0.00350687	0.00292672	0.0138693		-0.235091	-0.10547	0.0793672	-0.0457358	0.362888		-3.64704	-2.28696	2.25741	-0.782726
873	884		1432.76	11	9.03-9.10	0.635082	0.651386	0.636047	0.614195	0.622806		0.628334	0.642524	0.652723	0.629463	0.620567	873	884	0.00674735	0.00886201	-0.0166758	-0.015268	0.00223948		-0.002819		873	884	0.0120894	0.0129005	0.0162799	0.0296749	0.00752307	0.00626391	0.00309851	0.0112638	0.0202559	0.0132		0.0742209	0.0974821	-0.183434	-0.167948	0.0246343		0.858322	1.15693	-1.459	-0.73603
[truncated: 8 more columns]

## Sheet: ATG14 Summary
ATG14				Date:			01.01.19		SD	0.0118463															Unhide														for STDEV	Threshold Value=		0.5
Global Color scale				Experiment date:			25.12.18			-0.002657																														Threshold percent		0.02
0.1	0.35	0.7		Protein:			ATG14L																																	t-threshold		2.776
				Instrument:			Waters Synapt G2 Si										-0.1	-0.05	-0.02	0.02	0.05	0.5
																													STDEVS					STDEVS
		Max Frac Deut		0.67		a	Apo					b	With Lipids						% Differences (Apo - With Lipids)										a	Default State				b	Lipids					Differences in Daltons (Differences >+/- 0.5Da Highlighted						t-test	*=assumes triplicate values, a p=0.05 test
Start	End	Mod	m/z	#D	RT	0.005	0.05	0.5	5	50		0.005	0.05	0.5	5	50	Start	End	0.005	0.05	0.5	5	50		avg		Start	End	0.005	0.05	0.5	5	50	0.005	0.05	0.5	5	50		0.005	0.05	0.5	5	50		0.005	0.05	0.5	5
5	12		759.447	7	11.46-11.55	0.0692548	0.155169	0.177637	0.273118	0.30727		0.0629608	0.150405	0.176775	0.257624	0.29401	5	12	0.00629403	0.00476439	0.00086226	0.015494	0.0132603		0.00813501		6	13	0.0214147	0.0078887	0.0177584	0.00367122	0.0114825	0.0122544	0.00336525	0.00410896	0.00421258	0.00665394		0.0440582	0.0333507	0.00603582	0.108458	0.0928224		0.441842	0.962183	0.081935	4.80267
6	16		1026.57	9	8.81-8.86	0.0345756	0.0547521	0.106998	0.204322	0.299531		0.0222914	0.0483902	0.130292	0.211826	0.302419	6	16	0.0122842	0.00636186	-0.0232937	-0.00750381	-0.00288723		-0.00300773		7	17	0.0100249	0.0062058	0.00270945	0.00288507	0.00530083	0.00336235	0.00675489	0.0197335	0.00853765	0.0136199		0.110558	0.0572567	-0.209643	-0.0675343	-0.0259851		2.01225	1.20127	-2.02553	-1.4422
8	19		1098.54	9	11.46-11.49	0.0250658	0.0798977	0.120345	0.167592	0.201023		0.0289685	0.094801	0.138974	0.16912	0.227668	8	19	-0.00390265	-0.0149033	-0.0186294	-0.00152836	-0.0266451		-0.0131218		9	20	0.00560547	0.00356036	0.00696716	0.00527778	0	0.00793847	0.00320829	0.0127149	0.012691	0.0172343		-0.0351239	-0.13413	-0.167664	-0.0137552	-0.239806		-0.69557	-5.38604	-2.22552	-0.192597
14	25		1209.62	8	7.45-7.58	0.0213103	0.0687289	0.101144	0.246488	0.318952		0.0347103	0.0645233	0.0914287	0.234649	0.297531	14	25	-0.0134	0.0042056	0.0097153	0.0118392	0.0214209		0.00675619		15	26	0.00391996	0.00866922	0.00619627	0.0232037	0.00723097	0.00621213	0.00744384	0.00618377	0.0147159	0.0127621		-0.1072	0.0336448	0.0777224	0.0947134	0.171367		-3.15968	0.63749	1.92225	0.746307
25	37		1410.63	12	9.10-9.31	0.13726	0.210571	0.255598	0.295972	0.312772		0.143391	0.210444	0.289164	0.274919	0.325936	25	37	-0.00613122	0.000126493	-0.0335662	0.0210529	-0.0131647		-0.00633654		26	38	0.022829	0.015084	0.0154173	0.0173871	0.00703072	0.0108292	0.0072954	0.00841679	0.0195289	0.00334577		-0.0735746	0.00151791	-0.402794	0.252634	-0.157976		-0.42029	0.0130758	-3.30986	1.39458
29	37		968.421	8	9.68-9.71	0.514403	0.558571	0.556583	0.562347	0.578332		0.524718	0.563014	0.571282	0.566418	0.591534	29	37	-0.0103144	-0.00444328	-0.0146989	-0.0040709	-0.0132024		-0.00934597		30	38	0.00861754	0.00921119	0.0199776	0.00362668	0.00701549	0.0209791	0.0169106	0.0056694	0.0184104	0.0118806		-0.0825149	-0.0355463	-0.117591	-0.0325672	-0.105619		-0.787697	-0.399655	-1.22598	-0.375767
30	45		1748.85	14	11.35-11.45	0.0816474	0.160152	0.198751	0.223525	0.334672		0.0889245	0.153421	0.194745	0.229974	0.304021	30	45	-0.00727708	0.00673166	0.00400629	-0.00644861	0.0306513		0.00553271		31	46	0.00450128	0.00586269	0.00884755	0.0121648	0.0111469	0.0156031	0	0.00489744	0.00127132	0.0318654		-0.101879	0.0942433	0.0560881	-0.0902806	0.429118		-0.776154	1.98878	0.686186	-0.913193
40	48		1034.48	7	8.53-8.60	0.0558507	0.128451	0.282556	0.376229	0.473842		0.0728947	0.16657	0.257073	0.392298	0.446428	40	48	-0.0170439	-0.0381194	0.0254834	-0.0160691	0.0274147		-0.00366687		41	49	0.00488017	0.0367934	0.000972921	0	0.00444115	0.00440533	0.0384851	0.0431077	0.0204915	0.011093		-0.119307	-0.266836	0.178384	-0.112484	0.191903		-4.49027	-1.24006	1.02365	-1.35825
41	48		935.407	6	8.18-8.23	0.0529779	0.0935358	0.172394	0.316056	0.462587		0.0899221	0.10306	0.197105	0.308527	0.455086	41	48	-0.0369443	-0.00952438	-0.0247107	0.00752861	0.00750124		-0.0112299		42	49	0.0365679	0.03489	0.0216445	0.0354438	0.000927114	0.00664726	0.0110983	0.0222286	0.00249851	0.0199311		-0.221666	-0.0571463	-0.148264	0.0451716	0.0450075		-1.72166	-0.450574	-1.37951	0.366994
49	55		905.51	6	5.00-5.05	0.158711	0.252088	0.327593	0.430242	0.514227		0.16712	0.25863	0.349097	0.453166	0.509877	49	55	-0.00840896	-0.00654279	-0.021504	-0.0229244	0.00434975		-0.0110061		50	56	0.0188204	0.0269264	0.0270873	0.0204968	0.0283808	0.0153351	0.024756	0.0231154	0.0252597	0.0282525		-0.0504537	-0.0392567	-0.129024	-0.137546	0.0260985		-0.59994	-0.309823	-1.04595	-1.22062
49	58		1207.65	9	4.94-4.99	0.110655	0.181808	0.25478	0.420061	0.484371		0.110281	0.181205	0.261431	0.428506	0.498875	49	58	0.000374793	0.000603648	-0.00665091	-0.00844461	-0.014504		-0.00572421		50	59	0.011837	0.0138453	0.01497	0.0145809	0.0160478	0.012673	0.0152451	0.0152703	0.0124481	0.0173249		0.00337313	0.00543284	-0.0598582	-0.0760015	-0.130536		0.0374345	0.0507701	-0.538703	-0.762916
57	64		883.398	7	7.62-7.68	0.138161	0.149774	0.204043	0.3918	0.597956		0.158297	0.174953	0.223554	0.414799	0.60168	57	64	-0.0201352	-0.0251795	-0.0195109	-0.0229994	-0.00372409		-0.0183098		58	65	0.00174989	0.0124655	0.0110663	0.00863966	0.00673092	0.00843497	0.00703262	0.0102154	0.00568422	0.00916695		-0.140946	-0.176257	-0.136576	-0.160996	-0.0260687		-4.04839	-3.04716	-2.24388	-3.85192
64	71		1018.46	7	10.05-10.10	0.184246	0.300226	0.343291	0.44748	0.565368		0.189514	0.312178	0.354896	0.457718	0.5543	64	71	-0.00526802	-0.0119514	-0.0116043	-0.0102377	0.0110678		-0.00559872		65	72	0.0118608	0.00937079	0.0250211	0.0183612	0.0110288	0.016167	0.0146883	0.0115132	0.0120452	0.0164499		-0.0368761	-0.0836597	-0.0812299	-0.0716642	0.0774746		-0.45506	-1.18812	-0.729741	-0.807499
70	81		1647.9	11	6.40-6.55	0.0470168	0.0777293	0.113126	0.120354	0.151414		0.0647123	0.0794836	0.0956567	0.127405	0.173291	70	81	-0.0176955	-0.00175427	0.0174691	-0.00705088	-0.0218773		-0.00618179		71	82	0.00797354	0.0109379	0.0103972	0.0112155	0.00967639	0.000975577	0.0139752	0.00878331	0.00538806	0.0054152		-0.194651	-0.019297	0.19216	-0.0775597	-0.240651		-3.81545	-0.171215	2.22308	-0.981507
72	82		1489.86	10	6.01-6.15	0.0555112	0.0522006	0.0744434	0.144424	0.31365		0.0526373	0.0640776	0.0848803	0.129508	0.287299	72	82	0.00287388	-0.011877	-0.0104369	0.0149164	0.0263503		0.00436534		73	83	0.0155787	0.0307721	0.0199975	0.0313242	0.0365685	0.0133269	0.0141139	0.0183713	0.0142648	0.0261809		0.0287388	-0.11877	-0.104369	0.149164	0.263503		0.242801	-0.607648	-0.665699	0.750625
72	85		1846.08	13	6.53-6.72	0.0482825	0.0757397	0.0842519	0.21631	0.378754		0.0417951	0.0525968	0.0874518	0.2228	0.373559	72	85	0.00648749	0.0231429	-0.00319989	-0.00649001	0.00519529		0.00502716		73	86	0.0172413	0.0108594	0.0163968	0.00842514	0.0268881	0.0185693	0.0126171	0.0119068	0.0228858	0.0374626		0.0843373	0.300858	-0.0415985	-0.0843701	0.0675388		0.443446	2.40795	-0.273509	-0.460938
76	82		901.547	6	5.22-5.25	0.0185311	0.0246856	0.0355022	0.0757042	0.217263		0.016401	0.0231764	0.0360595	0.0759005	0.222609	76	82	0.0021301	0.0015092	-0.000557214	-0.000196269	-0.00534527		-0.000491891		77	83	0.0210654	0.0239343	0.0176224	0.0198502	0.0226525	0.0273851	0.0162886	0.0216781	0.0309142	0.0253259		0.0127806	0.00905522	-0.00334328	-0.00117761	-0.0320716		0.106786	0.0902906	-0.0345461	-0.00925316
76	85		1257.76	9	5.99-6.07	0.0424498	0.0519552	0.0898141	0.220107	0.349284		0.0621874	0.0604035	0.0977872	0.223674	0.354714	76	85	-0.0197376	-0.00844826	-0.00797313	-0.00356733	-0.00543035		-0.00903134		77	86	0.0190216	0.0189302	0.0274177	0.0185418	0.0177794	0.0159779	0.0190295	0.0220267	0.01923	0.0215746		-0.177639	-0.0760343	-0.0717582	-0.032106	-0.0488731		-1.37617	-0.545153	-0.392664	-0.231302
76	91		1987.13	15	5.83-5.87	0.0690407	0.123728	0.206004	0.481174	0.53995		0.0678505	0.123508	0.216098	0.483656	0.549475	76	91	0.00119015	0.000219801	-0.0100934	-0.00248179	-0.00952507		-0.00413807		77	92	0.0108814	0.00891811	0.0207496	0.0240042	0.027583	0.00999194	0.00796498	0.013215	0.026411	0.0295852		0.0178522	0.00329701	-0.151401	-0.0372269	-0.142876		0.139538	0.0318392	-0.710652	-0.120444
86	97		1492.8	11	7.68-7.73	0.0409539	0.046425	0.0785123	0.252868	0.527705		0.0389997	0.0509875	0.0867166	0.276442	0.528964	86	97	0.00195414	-0.00456255	-0.00820421	-0.0235742	-0.00125848		-0.00712906		87	98	0.0153942	0.0185596	0.0135366	0.0136309	0.0143009	0.0134722	0.0137318	0.013627	0.0168261	0.0119805		0.0214955	-0.0501881	-0.0902463	-0.259316	-0.0138433		0.165454	-0.342292	-0.739813	-1.8856
98	108		1306.65	10	8.26-8.31	0.114723	0.281397	0.627294	0.76094	0.815101		0.121649	0.284176	0.621836	0.741901	0.776863	98	108	-0.00692537	-0.00277866	0.00545851	0.0190385	0.0382382		0.0106062		99	109	0.0194312	0.00875418	0.0148543	0.0189807	0.0105942	0.00656015	0.0132548	0.00553478	0.0186824	0.00985299		-0.0692537	-0.0277866	0.0545851	0.190385	0.382382		-0.584878	-0.302981	0.596419	1.23816
98	109		1419.73	11	10.14-10.20	0.0950863	0.279942	0.488932	0.652907	0.698909		0.0858045	0.285936	0.500675	0.660334	0.715788	98	109	0.00928182	-0.00599362	-0.0117434	-0.00742673	-0.0168788		-0.00655216		99	110	0.0222934	0.012164	0.0105502	0.0203733	0.0336852	0.0146095	0.00950353	0.0122391	0.0104559	0.00921018		0.1021	-0.0659299	-0.129178	-0.081694	-0.185667		0.60316	-0.67252	-1.25878	-0.561731
105	115		1390.75	10	10.29-10.36	0.0626343	0.124775	0.154197	0.323595	0.50899		0.0383564	0.121266	0.154747	0.324284	0.524975	105	115	0.0242779	0.00350836	-0.000549851	-0.000689104	-0.0159852		0.00211242		106	116	0.0111358	0.0070609	0.00812821	0.0151073	0.017399	0.0176475	0.00678239	0.00533567	0.016546	0.0113784		0.242779	0.0350836	-0.00549851	-0.00689104	-0.159852		2.01515	0.620658	-0.0979499	-0.0532714
117	123		917.524	6	8.16-8.25	0.0339607	0.0434694	0.0447776	0.0725483	0.192108		0.0557512	0.0444211	0.0543816	0.0761107	0.190584	117	123	-0.0217905	-0.000951741	-0.00960398	-0.00356244	0.00152363		-0.00687701		118	124	0.0193736	0.0174682	0.0232321	0.0204502	0.016995	0.0165321	0.0173525	0.0228234	0.018441	0.017992		-0.130743	-0.00571045	-0.0576239	-0.0213746	0.00914179		-1.48192	-0.0669507	-0.510774	-0.224074
119	133		1788.93	14	6.99-7.02	0.0616537	0.0689729	0.088435	0.193162	0.435571		0.0740576	0.0740584	0.103433	0.216933	0.434809	119	133	-0.0124038	-0.0050855	-0.014998	-0.0237701	0.000762367		-0.011099		120	134	0.0164293	0.0105553	0.00792932	0.00964893	0.00956876	0.00531578	0.00813529	0.0137428	0.010095	0.0170904		-0.173654	-0.071197	-0.209972	-0.332782	0.0106731		-1.24416	-0.66096	-1.63727	-2.94824
124	134		1280.6	10	6.21-6.25	0.0674878	0.0850149	0.109506	0.234044	0.458786		0.077501	0.0822719	0.110148	0.251697	0.465729	124	134	-0.0100133	0.00274299	-0.000642388	-0.0176536	-0.00694358		-0.00650197		125	135	0.0050491	0.00790478	0.0088906	0.0101972	0.00315716	0.00490687	0.00550134	0.00737209	0.00488537	0.00969388		-0.100133	0.0274299	-0.00642388	-0.176536	-0.0694358		-2.46334	0.493317	-0.0963376	-2.70424
162	180		2320.36	18	11.59-11.64	0.0711309	0.248157	0.423203	0.636304	0.710636		0.073039	0.248365	0.42612	0.638804	0.714985	162	180	-0.00190804	-0.000207711	-0.00291667	-0.00249967	-0.00434892		-0.0023762		163	181	0.00801625	0.00775589	0.0105356	0.00984254	0.00974668	0.00370191	0.0106166	0.0131488	0.00804411	0.0110242		-0.0343448	-0.00373881	-0.0525	-0.044994	-0.0782806		-0.374283	-0.0273632	-0.299828	-0.3406
175	183		1058.65	8	7.82-7.89	0.0495748	0.0639123	0.0697144	0.108406	0.273361		0.0573685	0.0587657	0.0736756	0.118435	0.258889	175	183	-0.00779366	0.00514664	-0.00396119	-0.0100282	0.0144718		-0.00043291		176	184	0.0158256	0.0157526	0.0181966	0.0170037	0.014294	0.0157974	0.0158058	0.0152664	0.0194737	0.01652		-0.0623493	0.0411731	-0.0316896	-0.0802254	0.115775		-0.603691	0.39947	-0.288853	-0.671862
175	185		1301.78	10	7.67-7.76	0.0528251	0.0843439	0.0931101	0.114207	0.19601		0.058489	0.0896422	0.0909812	0.130144	0.164507	175	185	-0.00566388	-0.00529836	0.00212896	-0.0159373	0.0315027		0.00134642		176	186	0.00609567	0.00394239	0.00566612	0.00805746	0.0209275	0.00157149	0.0145661	0.00759582	0.0214658	0.00284418		-0.0566388	-0.0529836	0.0212896	-0.159373	0.315027		-1.5584	-0.608145	0.389122	-1.20394
176	183		945.562	7	7.36-7.43	0.0562032	0.0639962	0.0691305	0.0996469	0.23713		0.0577392	0.0591544	0.0767232	0.112127	0.247468	176	183	-0.00153603	0.00484179	-0.00759275	-0.0124804	-0.0103375		-0.00542098		177	184	0.00674478	0.0074081	0.00809147	0.00885928	0.0127814	0.00385991	0.00473241	0.00869616	0.00897015	0.0107633		-0.0107522	0.0338925	-0.0531493	-0.0873627	-0.0723627		-0.342354	0.953993	-1.10714	-1.71458
176	190		1887.04	14	7.37-7.56	0.0521355	0.0723715	0.106344	0.176438	0.232665		0.0465447	0.0716407	0.0972378	0.164729	0.242436	176	190	0.00559083	0.00073081	0.00910576	0.0117096	-0.00977122		0.00347316		177	191	0.00865981	0.00973316	0.0155964	0.0142314	0.038534	2.42403e-14	0.00702164	0.00439307	0.00299606	0.0319081		0.0782716	0.0102313	0.127481	0.163934	-0.136797		1.11822	0.10547	0.973361	1.39456
184	190		960.501	6	5.73-5.84	0.0416612	0.0596682	0.0812896	0.164956	0.249905		0.053504	0.0575771	0.0794552	0.175292	0.250575	184	190	-0.0118428	0.00209104	0.00183433	-0.0103363	-0.000670398		-0.00378483		185	191	0.0142363	0.00991343	0.0209873	0.0143396	0.0116771	0.0113915	0.0144348	0.012659	0.0136221	0.010941		-0.0710567	0.0125463	0.011006	-0.0620179	-0.00402239		-1.12501	0.206828	0.129629	-0.90518
184	193		1258.67	9	7.64-7.77	0.0316546	0.0286008	0.0602794	0.114	0.221768		0.0212507	0.0335134	0.0546939	0.131492	0.217961	184	193	0.0104038	-0.0049126	0.00558557	-0.0174912	0.00380746		-0.000521393		185	194	0.0126905	0.00899221	0.0113066	0.00547794	0.0140945	0.00103682	0.00239386	0.00159585	0.00474842	0.00329536		0.0936343	-0.0442134	0.0502701	-0.157421	0.0342672		1.41523	-0.914403	0.84725	-4.17899
185	200		1994.07	15	5.26-5.28	0.110361	0.171274	0.268352	0.331198	0.418828		0.117638	0.156761	0.260695	0.33214	0.424163	185	200	-0.00727612	0.0145131	0.00765791	-0.000941692	-0.00533423		0.0017238		186	201	0.0168211	0.0126186	0.0241833	0.0136025	0.0307034	0.00943751	0.0128594	0.00845711	0.0138781	0.019405		-0.109142	0.217697	0.114869	-0.0141254	-0.0800134		-0.653401	1.39525	0.517728	-0.0839337
191	201		1321.77	10	8.78-8.93	0.0220046	0.0076991	0.0239837	0.0245293	0.0747157		0.0307831	0.0259204	0.0285343	0.0166985	0.089671	191	201	-0.00877851	-0.0182213	-0.0045506	0.00783075	-0.0149554		-0.00773501		192	202	0.00131149	0.0189539	0.00565836	0.00628896	0.0135937	0.000231642	0.00448403	0.017387	0.00457015	0.00304254		-0.0877851	-0.182213	-0.045506	0.0783075	-0.149554		-11.4168	-1.62038	-0.431067	1.74466
194	201		1023.61	7	8.32-8.52	0.0264126	0.0223358	0.0265439	0.0258554	0.0685397		0.0220215	0.0267808	0.0267081	0.0304936	0.0652751	194	201	0.00439104	-0.00444499	-0.000164179	-0.00463817	0.00326461		-0.000318337		195	202	0.0121053	0.00666674	0.00637058	0.00884691	0.00703753	0.0075597	0.0078629	0.00555778	0.00784989	0.00889211		0.0307373	-0.0311149	-0.00114925	-0.0324672	0.0228522		0.5329	-0.746835	-0.0336362	-0.679228
197	206		1171.67	9	7.46-7.60	0.0325682	0.0605779	0.0895521	0.196816	0.257684		0.025836	0.0624773	0.0740839	0.202773	0.249148	197	206	0.00673217	-0.00189934	0.0154682	-0.00595655	0.00853632		0.00457615		198	207	0.0192738	0.0183547	0.0184836	0.0259035	0.0226423	0.0201453	0.0200227	0.0221874	0.0216842	0.0202086		0.0605896	-0.017094	0.139213	-0.053609	0.0768269		0.418233	-0.121113	0.927761	-0.305404
202	208		776.455	5	12.05-12.09	0.0397272	0.091917	0.168743	0.336097	0.575676		0.042114	0.105024	0.19038	0.355098	0.579233	202	208	-0.00238687	-0.0131066	-0.0216373	-0.0190006	-0.00355642		-0.0119376		203	209	0.00913821	0.00941851	0.0107704	0.0124809	0.00687134	0.00218179	0.0086794	0.015586	0.00385015	0.0227958		-0.0119343	-0.0655328	-0.108187	-0.095003	-0.0177821		-0.440037	-1.77245	-1.97816	-2.51967
202	209		905.498	6	11.96-11.98	0.0304958	0.0480535	0.063004	0.151624	0.375898		0.0398313	0.0491883	0.070704	0.15811	0.370099	202	209	-0.00933557	-0.00113483	-0.0077	-0.00648607	0.005799		-0.00377149		203	210	0.00119005	0.0134617	0.0120189	0.0125883	0.00629254	0.00119005	0.00760995	0.00785149	0.013954	0.0182095		-0.0560134	-0.00680896	-0.0462	-0.0389164	0.034794		-9.60774	-0.127108	-0.928993	-0.597785
202	210		1034.54	7	11.89-11.91	0.092467	0.122469	0.126444	0.217689	0.407954		0.0963433	0.123202	0.140069	0.224422	0.416017	202	210	-0.00387633	-0.000733262	-0.0136249	-0.00673305	-0.0080629		-0.0066061		203	211	0.0162207	0.0101136	0.00993753	0.0163629	0.027378	0.0105403	0.0103559	0.0119947	0.013239	0.0166286		-0.0271343	-0.00513284	-0.0953746	-0.0471313	-0.0564403		-0.347076	-0.0877399	-1.51505	-0.554067
211	220		1057.56	8	5.36-5.38	0.619285	0.630316	0.624307	0.644748	0.632193		0.622949	0.628782	0.638603	0.638246	0.641089	211	220	-0.00366418	0.0015347	-0.0142968	0.00650205	-0.00889608		-0.00376407		212	221	0.00618134	0.0185974	0.0212562	0.00408545	0.00789067	0.015739	0.00332052	0.0171073	0.0164142	0.0126897		-0.0293134	0.0122776	-0.114375	0.0520164	-0.0711687		-0.375328	0.140708	-0.907555	0.665794
211	226		1661.8	14	6.32-6.35	0.570574	0.604183	0.598733	0.618854	0.622088		0.577763	0.603046	0.603671	0.619386	0.634926	211	226	-0.00718923	0.00113742	-0.00493753	-0.000532623	-0.0128382		-0.00487203		212	227	0.00928977	0.0111712	0.0157436	0.0188907	0.02232	0.0122288	0.00960853	0.0040952	0.00767281	0.0158851		-0.100649	0.0159239	-0.0691254	-0.00745672	-0.179734		-0.810834	0.1337	-0.525713	-0.0452453
211	229		1950.91	17	7.33-7.37	0.567283	0.586976	0.585648	0.606095	0.611867		0.583545	0.592654	0.596658	0.613007	0.626715	211	229	-0.0162613	-0.00567823	-0.0110094	-0.0069122	-0.0148482		-0.0109419		212	230	0.0138868	0.00999552	0.00969693	0.0102522	0.00778578	0.00578411	0.00606444	0.00664267	0.00831598	0.0143913		-0.276442	-0.0965299	-0.18716	-0.117507	-0.252419		-1.87229	-0.841217	-1.62233	-0.906934
212	234		2327.07	21	7.25-7.28	0.655616	0.667414	0.677089	0.676905	0.693268		0.674964	0.673165	0.678916	0.682568	0.694786	212	234	-0.019348	-0.00575011	-0.00182708	-0.00566247	-0.00151862		-0.00682125		213	235	0.0158284	0.0124294	0.00942594	0.0018081	0.00441429	0.00292047	0.0154405	0.0144185	0.00861571	0.004914		-0.406307	-0.120752	-0.0383687	-0.118912	-0.031891		-2.08204	-0.502454	-0.183708	-1.11408
230	237		822.457	7	6.67-6.73	0.577326	0.599567	0.599189	0.608663	0.629289		0.595929	0.606401	0.615038	0.62505	0.623827	230	237	-0.0186028	-0.00683475	-0.0158488	-0.0163868	0.00546183		-0.0104423		231	238	0.00926887	0.0101814	0.00743795	0.00691876	0.00753412	0.00954222	0.00565928	0.00684861	0.00750064	0.0122469		-0.130219	-0.0478433	-0.110942	-0.114707	0.0382328		-2.42211	-1.01627	-2.71504	-2.78143
230	239		1022.54	9	6.57-6.60	0.633805	0.659232	0.655414	0.658504	0.6733		0.644921	0.657605	0.6667	0.675541	0.693004	230	239	-0.0111153	0.0016262	-0.0112864	-0.0170365	-0.0197046		-0.0115033		231	240	0.0150612	0.0119116	0.00525688	0.0109443	0.0120391	0.00530846	0.0137388	0.00963781	0.0123959	0.0116619		-0.100037	0.0146358	-0.101578	-0.153328	-0.177342		-1.20557	0.154902	-1.78067	-1.78449
238	245		967.496	7	5.23-5.25	0.696972	0.704923	0.69553	0.71407	0.713722		0.709977	0.706601	0.71208	0.708898	0.707804	238	245	-0.0130051	-0.00167804	-0.0165501	0.00517228	0.00591791		-0.00402861		239	246	0.0068516	0.0189962	0.0181235	0.0150181	0.0195836	0.00866716	0.0176793	0.0133663	0.0293446	0.0164742		-0.0910358	-0.0117463	-0.115851	0.036206	0.0414254		-2.03883	-0.112001	-1.27294	0.271768
249	260		1377.55	11	7.15-7.20	0.25341	0.333801	0.358993	0.351777	0.373802		0.25492	0.355371	0.357756	0.34902	0.375938	249	260	-0.00150963	-0.0215696	0.0012365	0.00275699	-0.00213664		-0.00424448		250	261	0.0158744	0.00497341	0.00516404	0.00437232	0.00437422	0.0173579	0.00786445	0.0125502	0.00959172	0.0051844		-0.016606	-0.237266	0.0136015	0.0303269	-0.023503		-0.111162	-4.01498	0.157812	0.453005
251	260		1035.37	9	4.76-4.77	0.236296	0.29488	0.298878	0.306018	0.302987		0.247978	0.30064	0.302469	0.305773	0.299905	251	260	-0.0116823	-0.00576036	-0.00359071	0.000245439	0.00308209		-0.00354116		252	261	0.0152808	0.0160096	0.0179992	0.0183091	0.0167469	0.0215529	0.0179282	0.0174103	0.0195837	0.0165345		-0.10514	-0.0518433	-0.0323164	0.00220896	0.0277388		-0.765862	-0.415096	-0.248357	0.0158569
251	262		1235.48	11	6.05-6.07	0.183847	0.233878	0.255456	0.322918	0.367076		0.191052	0.242116	0.25795	0.32828	0.365664	251	262	-0.00720543	-0.00823853	-0.00249403	-0.00536187	0.00141167		-0.00437764		252	263	0.00793134	0.0038114	0.00267558	0.0110128	0.00465047	0.00530814	0.00769484	0.00823284	0.00203406	0.00301777		-0.0792597	-0.0906239	-0.0274343	-0.0589806	0.0155284		-1.30768	-1.66175	-0.499011	-0.829272
251	267		1789.77	15	11.56-11.60	0.118618	0.156963	0.17291	0.249284	0.364966		0.121311	0.15721	0.178422	0.25208	0.366723	251	267	-0.00269313	-0.000246965	-0.00551224	-0.00279562	-0.00175731		-0.00260105		252	268	0.00292348	0.00377801	0.0045005	0.00692328	0.00760915	0.00957701	0.0070409	0.0065196	0.00308328	0.00588726		-0.040397	-0.00370448	-0.0826836	-0.0419343	-0.0263597		-0.465845	-0.0535333	-1.20517	-0.638907
251	275		2600.16	22	12.06-12.08	0.113142	0.15731	0.177058	0.249976	0.347573		0.102299	0.151855	0.186182	0.252435	0.354506	251	275	0.0108427	0.00545516	-0.00912368	-0.00245875	-0.00693365		-0.000443636		252	276	0.00761194	0.00245692	0.00387341	0.00400475	0.0011114	0.00182239	0.0026692	0.0156155	0.00311615	0.00712232		0.23854	0.120013	-0.200721	-0.0540925	-0.15254		2.39939	2.60449	-0.982218	-0.839267
261	267		773.419	5	12.46-12.50	0.0403836	0.0477364	0.0523872	0.138294	0.382021		0.0444573	0.0437448	0.0571597	0.128535	0.387817	261	267	-0.00407373	0.00399164	-0.00477254	0.0097591	-0.00579612		-0.000178328		262	268	0.00552716	0.00525373	0.00329134	0.00306985	0.00393224	0.0064197	0.00780269	0.00594866	0.00377791	0.000696119		-0.0203687	0.0199582	-0.0238627	0.0487955	-0.0289806		-0.832924	0.734989	-1.2159	3.47238
261	275		1583.81	12	12.76-12.81	0.115303	0.16259	0.186951	0.245825	0.427192		0.113757	0.163935	0.190115	0.26443	0.42818	261	275	0.00154552	-0.00134465	-0.00316368	-0.0186055	-0.000988308		-0.00451132		262	276	0.0106595	0.0105985	0.0106908	0.0143335	0.00587973	0.00528085	0.0105481	0.0271953	0.00535075	0.000123507		0.0185463	-0.0161358	-0.0379642	-0.223266	-0.0118597		0.22503	-0.155755	-0.187524	-2.1063
261	276		1746.87	13	13.13-13.14	0.12778	0.201239	0.228034	0.289907	0.45181		0.138249	0.200887	0.240172	0.298683	0.455983	261	276	-0.0104696	0.00035178	-0.0121375	-0.00877635	-0.00417313		-0.00704096		262	277	0.00942296	0.00683892	0.0107705	0.00338186	0.00210654	0.0140775	0.00218152	0.0117086	0.00316625	0.000386912		-0.136104	0.00457313	-0.157788	-0.114093	-0.0542507		-1.07047	0.0848793	-1.32145	-3.28124
261	278		1904.94	15	12.95-12.96	0.166222	0.256097	0.295425	0.357452	0.492987		0.168476	0.256755	0.309038	0.365667	0.50509	261	278	-0.00225383	-0.000658209	-0.0136132	-0.00821562	-0.0121022		-0.00736862		262	279	0.0196669	0.0185269	0.0240742	0.00936826	0.0166168	0.0252536	0.0218337	0.0189948	0.0100012	0.0155041		-0.0338075	-0.00987313	-0.204199	-0.123234	-0.181533		-0.121961	-0.0398134	-0.768904	-1.03841
261	279		2068	16	13.17-13.18	0.155061	0.234591	0.282619	0.373262	0.519569		0.157371	0.237025	0.291656	0.383662	0.522711	261	279	-0.00230979	-0.00243358	-0.00903675	-0.0103996	-0.00314123		-0.0054642		262	280	0.0124239	0.00590261	0.0123419	0.00166147	0.00174338	0.010922	0.00447071	0.017048	0.00462118	0.00240802		-0.0369567	-0.0389373	-0.144588	-0.166394	-0.0502597		-0.241848	-0.569253	-0.74369	-3.66799
263	279		1867.89	14	12.80-12.82	0.190433	0.282522	0.338661	0.430089	0.566379		0.194968	0.28463	0.351707	0.446286	0.574364	263	279	-0.00453443	-0.00210789	-0.0130468	-0.016197	-0.00798475		-0.00877418		264	280	0.0219498	0.0216754	0.0242525	0.0242184	0.0147741	0.0248776	0.0209622	0.030572	0.0206469	0.02411		-0.0634821	-0.0295104	-0.182655	-0.226758	-0.111787		-0.236729	-0.12108	-0.579081	-0.881511
283	294		1362.66	10	5.71-5.74	0.556608	0.557742	0.565052	0.579104	0.573596		0.559858	0.56457	0.561145	0.576429	0.56817	283	294	-0.00324925	-0.00682836	0.00390701	0.00267448	0.00542567		0.00038591		284	295	0.01652	0.0119515	0.0144248	0.0195587	0.0142336	0.0143315	0.0140628	0.0160451	0.0222558	0.0163139		-0.0324925	-0.0682836	0.0390701	0.0267448	0.0542567		-0.257332	-0.640846	0.313644	0.156346
290	301		1336.55	9	10.73-10.78	0.247915	0.298888	0.330297	0.442721	0.537132		0.262182	0.309562	0.342087	0.44097	0.548517	290	301	-0.0142672	-0.0106746	-0.0117905	0.00175091	-0.0113849		-0.00927327		291	302	0.0115065	0.00800647	0.00971725	0.0105536	0.0148959	0.0188988	0.00390697	0.0040408	0.0168313	0.0111612		-0.128404	-0.0960716	-0.106115	0.0157582	-0.102464		-1.11685	-2.07535	-1.94051	0.152654
315	322		924.515	7	11.81-11.89	0.0192102	0.0241365	0.0223092	0.0200516	0.0272942		0.0155597	0.020342	0.0229367	0.0231194	0.0300461	315	322	0.00365053	0.00379446	-0.000627505	-0.0030678	-0.00275181		0.000199574		316	323	0.00905757	0.00876631	0.0153096	0.0151872	0.00824691	0.00754691	0.0114431	0.00821301	0.0085484	0.0187418		0.0255537	0.0265612	-0.00439254	-0.0214746	-0.0192627		0.536311	0.455927	-0.0625593	-0.304893
315	334		2297.23	18	12.59-12.74	0.168007	0.254506	0.316781	0.375021	0.423509		0.180406	0.246057	0.31091	0.390558	0.424774	315	334	-0.0123987	0.0084495	0.00587123	-0.0155379	-0.00126451		-0.00297607		316	335	0.0129016	0.00659386	0.0265656	0.00521716	0.0108806	0.0137923	0.00786899	0.00932902	0.00481202	0.0108377		-0.223176	0.152091	0.105682	-0.279682	-0.0227612		-1.1371	1.42551	0.361176	-3.79182
316	322		810.472	6	11.81-11.89	0.0213843	0.0222361	0.0200903	0.0248366	0.0277154		0.0162045	0.0264998	0.0207692	0.0232274	0.0334525	316	322	0.00517985	-0.00426368	-0.000678856	0.0016092	-0.00573706		-0.000778109		317	323	0.00713632	0.00497886	0.00732711	0.0105555	0.0104134	0.00575945	0.00668234	0.00790149	0.00478731	0.00992786		0.0310791	-0.0255821	-0.00407313	0.00965522	-0.0344224		0.978327	-0.886201	-0.109115	0.240478
323	334		1391.74	10	9.34-9.40	0.259058	0.383176	0.476106	0.609407	0.685526		0.27567	0.391706	0.48321	0.633952	0.699263	323	334	-0.0166119	-0.00852925	-0.00710403	-0.0245454	-0.0137372		-0.0141056		324	335	0.0144475	0.00535164	0.0173737	0.0110585	0.00214254	0.0148372	0.0229555	0.00406597	0.00443612	0.0123181		-0.166119	-0.0852925	-0.0710403	-0.245454	-0.137372		-1.38937	-0.626747	-0.689594	-3.56806
335	353		2135.18	18	6.94-6.99	0.118353	0.18924	0.218552	0.331688	0.375553		0.140247	0.20444	0.228794	0.336192	0.381584	335	353	-0.0218948	-0.0151998	-0.0102418	-0.00450315	-0.00603167		-0.0115742		336	354	0.0191813	0.0140898	0.0144746	0.00343375	0.0174813	0.0246264	0.0170187	0.0143261	0.018203	0.0173631		-0.394106	-0.273596	-0.184352	-0.0810567	-0.10857		-1.21489	-1.19156	-0.871048	-0.421058
340	353		1618.98	13	5.21-5.25	0.0446726	0.0730772	0.100965	0.212078	0.265559		0.0468216	0.0699173	0.121191	0.218944	0.271141	340	353	-0.00214902	0.00315982	-0.0202255	-0.00686625	-0.00558243		-0.00633268		341	354	0.011133	0.0109295	0.0158628	0.0126901	0.0156165	0.00983479	0.0104059	0.0106344	0.0118901	0.0124814		-0.0279373	0.0410776	-0.262931	-0.0892612	-0.0725716		-0.250573	0.362666	-1.83434	-0.683878
360	366		844.431	6	8.45-8.50	0.197206	0.297318	0.330617	0.400077	0.505934		0.183428	0.299208	0.322255	0.404386	0.485465	360	366	0.0137789	-0.0018893	0.00836194	-0.00430945	0.0204694		0.00728229		361	367	0.00906542	0.0121674	0.0138132	0.00933483	0.0105948	0.00896791	0.0118211	0.00914627	0.0131985	0.00903159		0.0826731	-0.0113358	0.0501716	-0.0258567	0.122816		1.87157	-0.192898	0.874238	-0.461722
367	374		951.489	6	7.82-7.86	0.273923	0.404572	0.528863	0.656914	0.634255		0.268521	0.391856	0.54038	0.667141	0.680001	367	374	0.00540274	0.0127164	-0.0115169	-0.0102269	-0.045746		-0.00987413		368	375	0.0116781	0.0121789	0.0110035	0.0206246	0.0231164	0.0118711	0.00048607	0.0112209	0.00473532	0.00496766		0.0324164	0.0762985	-0.0691015	-0.0613612	-0.274476		0.56195	1.80706	-1.26929	-0.83707
367	379		1578.84	11	11.38-11.43	0.135443	0.218168	0.302303	0.452237	0.532924		0.142751	0.228312	0.311042	0.461168	0.541394	367	379	-0.00730841	-0.0101445	-0.00873867	-0.00893161	-0.00847042		-0.00871872		368	380	0.00454681	0.00139783	0	0	0.00320109	0.011365	0.00150488	0.00494858	0.000490095	0.00157191		-0.0803925	-0.11159	-0.0961254	-0.0982478	-0.0931746		-1.03413	-8.55475	-3.05862	-31.5653
367	380		1741.91	12	11.74-11.80	0.133475	0.202708	0.284531	0.403639	0.487755		0.127442	0.209013	0.28251	0.420532	0.491239	367	380	0.00603371	-0.00630535	0.00202164	-0.0168929	-0.00348445		-0.00372547		368	381	0.0128463	0.012543	0.0125789	0.0145391	0.0145197	0.0167107	0.0127682	0.0149055	0.0137703	0.0115153		0.0724045	-0.0756642	0.0242597	-0.202715	-0.0418134		0.495815	-0.610176	0.179533	-1.46114
369	379		1335.76	9	11.39-11.44	0.120802	0.217308	0.275386	0.43848	0.539626		0.141207	0.223037	0.295304	0.451283	0.561751	369	379	-0.0204048	-0.00572968	-0.0199187	-0.0128032	-0.0221242		-0.0161961		370	380	0.00873864	0.00878872	0.00275522	0.00189138	0.00812255	0.00880348	0.00243698	0.0115549	0.0102905	0.0145323		-0.183643	-0.0515672	-0.179269	-0.115228	-0.199118		-2.8492	-1.08813	-2.90435	-2.11946
370	379		1222.67	8	11.39-11.44	0.178258	0.245637	0.328343	0.504289	0.597395		0.165176	0.25475	0.339806	0.503783	0.613984	370	379	0.0130825	-0.00911287	-0.0114632	0.000506343	-0.0165896		-0.00471537		371	380	0.014078	0.00913526	0.00757817	0.0165448	0	0.00232966	0.00831007	0.00643955	0.00725131	0.00371399		0.10466	-0.072903	-0.091706	0.00405075	-0.132716		1.58797	-1.2781	-1.99654	0.0485501
380	387		881.425	6	8.28-8.31	0.288152	0.345852	0.363417	0.381665	0.405682		0.299647	0.363295	0.371627	0.388558	0.415636	380	387	-0.0114943	-0.0174433	-0.00820995	-0.00689328	-0.00995323		-0.0107988		381	388	0.0162139	0.00433657	0.0109632	0.00269303	0.00749577	0.00874726	0.000697761	0.00708085	0.00549129	0.00203209		-0.0689657	-0.10466	-0.0492597	-0.0413597	-0.0597194		-1.08064	-6.87848	-1.08957	-1.95214
388	399		1325.71	10	7.75-7.84	0.27451	0.440992	0.542955	0.597951	0.601794		0.275409	0.437043	0.544394	0.600625	0.602342	388	399	-0.000899701	0.00394821	-0.00143925	-0.00267388	-0.000548209		-0.000322567		389	400	0.00582687	0.00205045	0.0102788	0.00366328	0.000135821	0.0225616	0.0120831	0.00434776	0.00489075	0.00862612		-0.00899701	0.0394821	-0.0143925	-0.0267388	-0.00548209		-0.0668755	0.557977	-0.223364	-0.757916
405	420		1625.66	14	10.63-10.67	0.165408	0.206136	0.211751	0.294754	0.388861		0.171145	0.202474	0.232915	0.31642	0.397701	405	420	-0.00573699	0.00366205	-0.0211639	-0.0216662	-0.00883955		-0.0107489		406	421	0.0125377	0.00543412	0.013144	0.0177188	0.00872846	0.0119436	0.00480597	0.000657036	0.00681898	0.00486034		-0.0803179	0.0512687	-0.296294	-0.303327	-0.123754		-0.573848	0.87434	-2.78538	-1.9766
427	443		2005.91	14	12.21-12.25	0.590625	0.631077	0.625089	0.647054	0.662968		0.616741	0.641867	0.651696	0.653908	0.667743	427	443	-0.026116	-0.0107897	-0.0266063	-0.00685362	-0.00477569		-0.0150283		428	444	0.0091822	0.0225147	0.00862932	0.00323188	0.00591866	2.42403e-14	0.00290917	0.00166588	0.0158982	0.00526514		-0.365624	-0.151055	-0.372488	-0.0959507	-0.0668597		-4.9263	-0.823202	-5.24352	-0.731712
429	443		1747.83	12	12.56-12.62	0.00122139	0.0202789	0.0540383	0.159962	0.308196		0.0141281	0.0276802	0.0516174	0.154749	0.324738	429	443	-0.0129067	-0.00740137	0.0024209	0.00521269	-0.0165418		-0.00584326		430	444	0.0153505	0.0105488	0.00378134	0.00445659	0.0198917	0.00565821	0.00561306	0.00607127	0.0173198	0.00663868		-0.154881	-0.0888164	0.0290507	0.0625522	-0.198501		-1.36644	-1.07284	0.586241	0.504846
432	443		1418.67	9	11.49-11.55	0.590874	0.643741	0.646399	0.659198	0.683965		0.580717	0.6476	0.65647	0.664994	0.674299	432	443	0.0101574	-0.00385871	-0.010071	-0.00579536	0.00966633		1.97347e-05		433	444	0	0	0.0019068	0.00328607	3.77071e-14	0.0295177	0.00760597	0.00337512	0.00893499	0.00638259		0.0914164	-0.0347284	-0.0906388	-0.0521582	0.086997		0.596018	-0.878714	-4.49978	-1.05438
444	450		749.313	5	6.56-6.57	0.553461	0.604522	0.635651	0.625647	0.634228		0.568192	0.632923	0.61365	0.651873	0.625661	444	450	-0.0147313	-0.0284006	0.0220015	-0.0262263	0.00856746		-0.00775785		445	451	0.0175606	0.014443	0.00898239	0.00966597	0.00600866	0.0248113	0.0097203	0.0140242	0.00842478	0.0298045		-0.0736567	-0.142003	0.110007	-0.131131	0.0428373		-0.839406	-2.82557	2.28818	-3.54271
444	452		977.424	7	7.61-7.63	0.65952	0.714827	0.711827	0.716446	0.721584		0.661574	0.717729	0.716415	0.725067	0.726608	444	452	-0.00205394	-0.00290256	-0.00458849	-0.0086209	-0.00502324		-0.00463783		445	453	0.00651557	0.00515245	0.00922793	0.00650213	0.00895672	0.0102224	0.00132175	0.00528294	0.00480853	0.00491066		-0.0143776	-0.0203179	-0.0321194	-0.0603463	-0.0351627		-0.293471	-0.945123	-0.747425	-1.8464
446	457		1288.64	10	10.12-10.21	0.0683939	0.261264	0.48165	0.620612	0.688101		0.0810778	0.248909	0.471072	0.648469	0.697187	446	457	-0.0126839	0.0123554	0.0105775	-0.0278572	-0.00908642		-0.00533893		447	458	0.0300522	0.0120799	0.0265099	0.0276949	0.00417627	0.0124876	0.0193545	0.0146384	0.0155331	0.0444166		-0.126839	0.123554	0.105775	-0.278572	-0.0908642		-0.67507	0.93799	0.604985	-1.51952
460	475		1460.7	13	10.82-10.92	0.0602889	0.111315	0.160108	0.225931	0.251089		0.0670325	0.105963	0.163811	0.22549	0.235441	460	475	-0.00674363	0.00535189	-0.00370299	0.000441561	0.0156486		0.00219908		461	476	0.0135591	0.0128459	0.0232251	0.012044	0.0179906	0.0139977	0.0133018	0.0126626	0.0122836	0.0117044		-0.0876672	0.0695746	-0.0481388	0.0057403	0.203431		-0.599356	0.501283	-0.242461	0.0444577
478	485		868.42	7	13.07-13.09	0.602343	0.647184	0.677797	0.703675	0.726472		0.238371	0.570063	0.656381	0.710809	0.727102	478	485	0.363972	0.0771215	0.0214164	-0.0071339	-0.000629424		0.0909493		479	486	0.0144642	0.00469019	0.0206729	0.00831429	0.00170896	0.00578166	0.00771727	0.0139868	0.00403774	0.0122164		2.5478	0.539851	0.149915	-0.0499373	-0.00440597		40.4713	14.7915	1.48615	-1.33684
485	492		979.511	7	5.42-5.46	0.477434	0.487113	0.489415	0.524476	0.52223		0.315839	0.484384	0.515526	0.50488	0.523958	485	492	0.161595	0.002729	-0.0261113	0.0195962	-0.00172857		0.031216		486	493	0.0336525	0.0084516	0.014397	0.00690277	0.0106527	0.0319075	0.0145753	0.024548	0.0152942	0.0117111		1.13116	0.019103	-0.182779	0.137173	-0.0121		6.03546	0.280547	-1.5892	2.02276
486	492		832.442	6	5.42-5.47	0.467454	0.474036	0.483136	0.494697	0.492933		0.317486	0.45943	0.497061	0.500002	0.507434	486	492	0.149969	0.0146057	-0.0139256	-0.00530572	-0.0145015		0.0261683		487	493	0.00568383	0.004601	0.0176204	0.00677488	0.0212316	0.00213035	0.0165876	0.0037398	0.0122336	0.00885821		0.899812	0.0876343	-0.0835537	-0.0318343	-0.087009		42.7933	1.46962	-1.33903	-0.657152
[truncated: 8 more columns]

## Sheet: DynamX_Data
Protein	Start	End	Sequence	Modification	Fragment	MaxUptake	MHP	State	Exposure	Center	Center SD	Uptake	Uptake SD	RT	RT SD
ATG14L	6	13	SGKGARAL			7	759.447	Default State	0	759.842	0.002683	0	0	11.4892	0.001051
ATG14L	6	13	SGKGARAL			7	759.447	Default State	0.005	760.167	0.100399	0.324805	0.100435	11.4567	0.011922
ATG14L	6	13	SGKGARAL			7	759.447	Default State	0.05	760.57	0.036901	0.727744	0.036998	11.474	0.003448
ATG14L	6	13	SGKGARAL			7	759.447	Default State	0.5	760.675	0.083244	0.833118	0.083287	11.4808	0.00638
ATG14L	6	13	SGKGARAL			7	759.447	Default State	5	761.123	0.017008	1.28093	0.017218	11.519	0.009925
ATG14L	6	13	SGKGARAL			7	759.447	Default State	50	761.283	0.053786	1.4411	0.053853	11.537	0.006154
ATG14L	6	13	SGKGARAL			7	759.447	Lipids	0	759.842	0.002683	0	0	11.4892	0.001051
ATG14L	6	13	SGKGARAL			7	759.447	Lipids	0.005	760.137	0.057411	0.295286	0.057473	11.4672	0.008485
ATG14L	6	13	SGKGARAL			7	759.447	Lipids	0.05	760.548	0.015553	0.705399	0.015783	11.4816	0.003382
ATG14L	6	13	SGKGARAL			7	759.447	Lipids	0.5	760.671	0.019083	0.829074	0.019271	11.489	0.008601
ATG14L	6	13	SGKGARAL			7	759.447	Lipids	5	761.05	0.019574	1.20826	0.019757	11.52	0.009852
ATG14L	6	13	SGKGARAL			7	759.447	Lipids	50	761.221	0.031091	1.37891	0.031207	11.5478	0.007593
ATG14L	7	17	GKGARALEAPG			9	1026.57	Default State	0	1027.14	0.007522	0	0	8.84491	0.000164
ATG14L	7	17	GKGARALEAPG			9	1026.57	Default State	0.005	1027.35	0.05998	0.208491	0.06045	8.80761	0.004865
ATG14L	7	17	GKGARALEAPG			9	1026.57	Default State	0.05	1027.47	0.036657	0.330155	0.037421	8.81439	0.001016
ATG14L	7	17	GKGARALEAPG			9	1026.57	Default State	0.5	1027.79	0.014504	0.6452	0.016338	8.82134	0.000525
ATG14L	7	17	GKGARALEAPG			9	1026.57	Default State	5	1028.37	0.015686	1.23206	0.017397	8.83719	0.011516
ATG14L	7	17	GKGARALEAPG			9	1026.57	Default State	50	1028.95	0.031067	1.80617	0.031964	8.83229	0.011856
ATG14L	7	17	GKGARALEAPG			9	1026.57	Lipids	0	1027.14	0.007522	0	0	8.84491	0.000164
ATG14L	7	17	GKGARALEAPG			9	1026.57	Lipids	0.005	1027.28	0.018828	0.134417	0.020275	8.81778	0.001817
ATG14L	7	17	GKGARALEAPG			9	1026.57	Lipids	0.05	1027.43	0.040031	0.291793	0.040732	8.82706	0.004261
ATG14L	7	17	GKGARALEAPG			9	1026.57	Lipids	0.5	1027.93	0.118755	0.785661	0.118993	8.83631	0.016909
ATG14L	7	17	GKGARALEAPG			9	1026.57	Lipids	5	1028.42	0.050929	1.27731	0.051482	8.83921	0.006484
ATG14L	7	17	GKGARALEAPG			9	1026.57	Lipids	50	1028.97	0.081782	1.82358	0.082128	8.85747	0.00134
ATG14L	9	20	GARALEAPGCGP			9	1098.54	Default State	0	1099.32	0	0	0	11.4773	0
ATG14L	9	20	GARALEAPGCGP			9	1098.54	Default State	0.005	1099.47	0.033801	0.151147	0.033801	11.465	0.003442
ATG14L	9	20	GARALEAPGCGP			9	1098.54	Default State	0.05	1099.8	0.021469	0.481783	0.021469	11.4642	0.005981
ATG14L	9	20	GARALEAPGCGP			9	1098.54	Default State	0.5	1100.04	0.042012	0.725681	0.042012	11.4669	0.003109
ATG14L	9	20	GARALEAPGCGP			9	1098.54	Default State	5	1100.33	0.031825	1.01058	0.031825	11.4858	0.004692
ATG14L	9	20	GARALEAPGCGP			9	1098.54	Default State	50	1100.53	0	1.21217	0	11.4884	0
ATG14L	9	20	GARALEAPGCGP			9	1098.54	Lipids	0	1099.32	0	0	0	11.4773	0
ATG14L	9	20	GARALEAPGCGP			9	1098.54	Lipids	0.005	1099.49	0.047869	0.17468	0.047869	11.4708	0.003661
ATG14L	9	20	GARALEAPGCGP			9	1098.54	Lipids	0.05	1099.89	0.019346	0.57165	0.019346	11.4622	0.003465
ATG14L	9	20	GARALEAPGCGP			9	1098.54	Lipids	0.5	1100.15	0.076671	0.838016	0.076671	11.4661	0.007717
ATG14L	9	20	GARALEAPGCGP			9	1098.54	Lipids	5	1100.34	0.076527	1.01979	0.076527	11.4752	0.00333
ATG14L	9	20	GARALEAPGCGP			9	1098.54	Lipids	50	1100.69	0.103923	1.37284	0.103923	11.4872	0.004267
ATG14L	15	26	APGCGPRPLARD			8	1209.62	Default State	0	1210.32	0	0	0	7.5145	0
ATG14L	15	26	APGCGPRPLARD			8	1209.62	Default State	0.005	1210.43	0	0.114223	0	7.44738	0
ATG14L	15	26	APGCGPRPLARD			8	1209.62	Default State	0.05	1210.68	0	0.368387	0	7.48705	0
ATG14L	15	26	APGCGPRPLARD			8	1209.62	Default State	0.5	1210.86	0	0.542132	0	7.49925	0
ATG14L	15	26	APGCGPRPLARD			8	1209.62	Default State	5	1211.64	0	1.32117	0	7.51824	0
ATG14L	15	26	APGCGPRPLARD			8	1209.62	Default State	50	1212.03	0.035829	1.70958	0.035829	7.55605	0.009646
ATG14L	15	26	APGCGPRPLARD			8	1209.62	Lipids	0	1210.32	0	0	0	7.5145	0
ATG14L	15	26	APGCGPRPLARD			8	1209.62	Lipids	0.005	1210.5	0	0.186047	0	7.4846	0
ATG14L	15	26	APGCGPRPLARD			8	1209.62	Lipids	0.05	1210.66	0.039899	0.345845	0.039899	7.50894	0.000442
ATG14L	15	26	APGCGPRPLARD			8	1209.62	Lipids	0.5	1210.81	0	0.490058	0	7.52385	0
ATG14L	15	26	APGCGPRPLARD			8	1209.62	Lipids	5	1211.57	0	1.25772	0	7.53975	0
ATG14L	15	26	APGCGPRPLARD			8	1209.62	Lipids	50	1211.91	0	1.59476	0	7.57683	0
ATG14L	26	38	DLVDSVDDAEGLY			12	1410.63	Default State	0	1411.42	0	0	0	9.14683	0
ATG14L	26	38	DLVDSVDDAEGLY			12	1410.63	Default State	0.005	1412.52	0	1.10357	0	9.09763	0
ATG14L	26	38	DLVDSVDDAEGLY			12	1410.63	Default State	0.05	1413.11	0	1.69299	0	9.1197	0
ATG14L	26	38	DLVDSVDDAEGLY			12	1410.63	Default State	0.5	1413.47	0	2.055	0	9.29693	0
ATG14L	26	38	DLVDSVDDAEGLY			12	1410.63	Default State	5	1413.8	0	2.37961	0	9.13827	0
ATG14L	26	38	DLVDSVDDAEGLY			12	1410.63	Default State	50	1413.93	0	2.51469	0	9.31172	0
ATG14L	26	38	DLVDSVDDAEGLY			12	1410.63	Lipids	0	1411.42	0	0	0	9.14683	0
ATG14L	26	38	DLVDSVDDAEGLY			12	1410.63	Lipids	0.005	1412.57	2.27374e-13	1.15286	2.27374e-13	9.12506	0
ATG14L	26	38	DLVDSVDDAEGLY			12	1410.63	Lipids	0.05	1413.11	0	1.69197	0	9.10967	0
ATG14L	26	38	DLVDSVDDAEGLY			12	1410.63	Lipids	0.5	1413.74	0	2.32488	0	9.13989	0
ATG14L	26	38	DLVDSVDDAEGLY			12	1410.63	Lipids	5	1413.63	0	2.21035	0	9.16202	0
ATG14L	26	38	DLVDSVDDAEGLY			12	1410.63	Lipids	50	1414.04	0.0269	2.62053	0.0269	9.16935	0.002663
ATG14L	30	38	SVDDAEGLY			8	968.421	Default State	0	968.86	0	0	0	9.70886	0
ATG14L	30	38	SVDDAEGLY			8	968.421	Default State	0.005	971.617	0.04619	2.7572	0.04619	9.67925	0.004795
ATG14L	30	38	SVDDAEGLY			8	968.421	Default State	0.05	971.854	0.049372	2.99394	0.049372	9.68008	0.002241
ATG14L	30	38	SVDDAEGLY			8	968.421	Default State	0.5	971.843	0.10708	2.98329	0.10708	9.6896	0.001543
ATG14L	30	38	SVDDAEGLY			8	968.421	Default State	5	971.874	0.019439	3.01418	0.019439	9.70064	0.009143
ATG14L	30	38	SVDDAEGLY			8	968.421	Default State	50	971.96	0.037603	3.09986	0.037603	9.70116	0.00522
ATG14L	30	38	SVDDAEGLY			8	968.421	Lipids	0	968.86	0	0	0	9.70886	0
ATG14L	30	38	SVDDAEGLY			8	968.421	Lipids	0.005	971.672	0.112448	2.81249	0.112448	9.69312	0.008658
ATG14L	30	38	SVDDAEGLY			8	968.421	Lipids	0.05	971.878	0.090641	3.01776	0.090641	9.68164	0.007758
ATG14L	30	38	SVDDAEGLY			8	968.421	Lipids	0.5	971.922	0.030388	3.06207	0.030388	9.69221	0.006649
ATG14L	30	38	SVDDAEGLY			8	968.421	Lipids	5	971.896	0.09868	3.036	0.09868	9.70012	0.005494
ATG14L	30	38	SVDDAEGLY			8	968.421	Lipids	50	972.031	0.06368	3.17062	0.06368	9.70878	0.00331
ATG14L	31	46	VDDAEGLYVAVERCPL			14	1748.85	Default State	0	1749.77	0	0	0	11.3808	0
ATG14L	31	46	VDDAEGLYVAVERCPL			14	1748.85	Default State	0.005	1750.54	0.042222	0.765853	0.042222	11.3545	0.00667
ATG14L	31	46	VDDAEGLYVAVERCPL			14	1748.85	Default State	0.05	1751.27	0.054992	1.50223	0.054992	11.3672	0.00372
ATG14L	31	46	VDDAEGLYVAVERCPL			14	1748.85	Default State	0.5	1751.63	0.08299	1.86428	0.08299	11.3676	0.000972
ATG14L	31	46	VDDAEGLYVAVERCPL			14	1748.85	Default State	5	1751.87	0.114106	2.09666	0.114106	11.412	0.012503
ATG14L	31	46	VDDAEGLYVAVERCPL			14	1748.85	Default State	50	1752.91	0.104558	3.13922	0.104558	11.4324	0.006819
ATG14L	31	46	VDDAEGLYVAVERCPL			14	1748.85	Lipids	0	1749.77	0	0	0	11.3808	0
ATG14L	31	46	VDDAEGLYVAVERCPL			14	1748.85	Lipids	0.005	1750.6	0.146357	0.834112	0.146357	11.3655	0.003825
ATG14L	31	46	VDDAEGLYVAVERCPL			14	1748.85	Lipids	0.05	1751.21	0	1.43909	0	11.3558	0
ATG14L	31	46	VDDAEGLYVAVERCPL			14	1748.85	Lipids	0.5	1751.6	0.045938	1.8267	0.045938	11.3821	0.004223
ATG14L	31	46	VDDAEGLYVAVERCPL			14	1748.85	Lipids	5	1751.93	0.011925	2.15715	0.011925	11.4199	0.009191
ATG14L	31	46	VDDAEGLYVAVERCPL			14	1748.85	Lipids	50	1752.62	0.298897	2.85171	0.298897	11.4531	0.006548
ATG14L	41	49	VERCPLCNT			7	1034.48	Default State	0	1035.02	0	0	0	8.5868	0
ATG14L	41	49	VERCPLCNT			7	1034.48	Default State	0.005	1035.28	0.022888	0.26194	0.022888	8.53459	0.011671
ATG14L	41	49	VERCPLCNT			7	1034.48	Default State	0.05	1035.62	0.172561	0.602435	0.172561	8.55445	0.000295
ATG14L	41	49	VERCPLCNT			7	1034.48	Default State	0.5	1036.34	0.004563	1.32519	0.004563	8.55345	0.006968
ATG14L	41	49	VERCPLCNT			7	1034.48	Default State	5	1036.78	0	1.76451	0	8.583	0
ATG14L	41	49	VERCPLCNT			7	1034.48	Default State	50	1037.24	0.020829	2.22232	0.020829	8.58525	0.001738
ATG14L	41	49	VERCPLCNT			7	1034.48	Lipids	0	1035.02	0	0	0	8.5868	0
ATG14L	41	49	VERCPLCNT			7	1034.48	Lipids	0.005	1035.36	0.020661	0.341876	0.020661	8.5579	0.007725
ATG14L	41	49	VERCPLCNT			7	1034.48	Lipids	0.05	1035.8	0.180495	0.781215	0.180495	8.56808	0.00306
ATG14L	41	49	VERCPLCNT			7	1034.48	Lipids	0.5	1036.22	0.202175	1.20567	0.202175	8.57528	0.006843
ATG14L	41	49	VERCPLCNT			7	1034.48	Lipids	5	1036.86	0.096105	1.83988	0.096105	8.58484	0.004451
ATG14L	41	49	VERCPLCNT			7	1034.48	Lipids	50	1037.11	0.052026	2.09375	0.052026	8.59894	0.003773
ATG14L	42	49	ERCPLCNT			6	935.407	Default State	0	935.989	0	0	0	8.20537	0
ATG14L	42	49	ERCPLCNT			6	935.407	Default State	0.005	936.202	0.147003	0.212971	0.147003	8.17945	0.012419
ATG14L	42	49	ERCPLCNT			6	935.407	Default State	0.05	936.365	0.140258	0.376014	0.140258	8.19191	0.002414
ATG14L	42	49	ERCPLCNT			6	935.407	Default State	0.5	936.682	0.087011	0.693025	0.087011	8.19967	0.002641
ATG14L	42	49	ERCPLCNT			6	935.407	Default State	5	937.259	0.142484	1.27054	0.142484	8.2111	0.008843
ATG14L	42	49	ERCPLCNT			6	935.407	Default State	50	937.848	0.003727	1.8596	0.003727	8.2201	0.000994
ATG14L	42	49	ERCPLCNT			6	935.407	Lipids	0	935.989	0	0	0	8.20537	0
ATG14L	42	49	ERCPLCNT			6	935.407	Lipids	0.005	936.35	0.026722	0.361487	0.026722	8.19567	0.008989
ATG14L	42	49	ERCPLCNT			6	935.407	Lipids	0.05	936.403	0.044615	0.414302	0.044615	8.20489	0.002423
ATG14L	42	49	ERCPLCNT			6	935.407	Lipids	0.5	936.781	0.089359	0.792362	0.089359	8.21062	0.004454
ATG14L	42	49	ERCPLCNT			6	935.407	Lipids	5	937.229	0.010044	1.24028	0.010044	8.21936	0.004884
ATG14L	42	49	ERCPLCNT			6	935.407	Lipids	50	937.818	0.080123	1.82944	0.080123	8.22945	0.003189
ATG14L	50	56	TRRRLTC			6	905.51	Default State	0	906.044	0.046672	0	0	5.01249	0.000476
ATG14L	50	56	TRRRLTC			6	905.51	Default State	0.005	906.682	0.059547	0.638017	0.075658	5.0005	0.007549
ATG14L	50	56	TRRRLTC			6	905.51	Default State	0.05	907.057	0.097665	1.01339	0.108244	5.01199	0.002673
ATG14L	50	56	TRRRLTC			6	905.51	Default State	0.5	907.361	0.098381	1.31692	0.108891	5.01638	0.008729
ATG14L	50	56	TRRRLTC			6	905.51	Default State	5	907.773	0.067904	1.72957	0.082397	5.02433	0.003793
ATG14L	50	56	TRRRLTC			6	905.51	Default State	50	908.111	0.104107	2.06719	0.114091	5.042	0.002269
ATG14L	50	56	TRRRLTC			6	905.51	Lipids	0	906.044	0.046672	0	0	5.01249	0.000476
ATG14L	50	56	TRRRLTC			6	905.51	Lipids	0.005	906.716	0.040274	0.671821	0.061647	5.00899	0.006406
ATG14L	50	56	TRRRLTC			6	905.51	Lipids	0.05	907.084	0.087896	1.03969	0.099519	5.02104	0.001934
ATG14L	50	56	TRRRLTC			6	905.51	Lipids	0.5	907.447	0.080352	1.40337	0.092924	5.02076	0.010495
ATG14L	50	56	TRRRLTC			6	905.51	Lipids	5	907.866	0.090183	1.82173	0.101544	5.03589	0.003442
ATG14L	50	56	TRRRLTC			6	905.51	Lipids	50	908.094	0.103542	2.0497	0.113575	5.04978	0.003484
ATG14L	50	59	TRRRLTCAKC			9	1207.65	Default State	0	1208.42	0.027507	0	0	4.94989	1.31619e-06
ATG14L	50	59	TRRRLTCAKC			9	1207.65	Default State	0.005	1209.08	0.065864	0.667252	0.071377	4.939	0.0048
ATG14L	50	59	TRRRLTCAKC			9	1207.65	Default State	0.05	1209.51	0.078825	1.09631	0.083487	4.94638	0.003424
ATG14L	50	59	TRRRLTCAKC			9	1207.65	Default State	0.5	1209.95	0.085976	1.53633	0.090269	4.95638	0.005821
ATG14L	50	59	TRRRLTCAKC			9	1207.65	Default State	5	1210.95	0.083509	2.53297	0.087923	4.96289	0.003127
ATG14L	50	59	TRRRLTCAKC			9	1207.65	Default State	50	1211.34	0.092776	2.92076	0.096768	4.9788	0.003528
ATG14L	50	59	TRRRLTCAKC			9	1207.65	Lipids	0	1208.42	0.027507	0	0	4.94989	1.31619e-06
ATG14L	50	59	TRRRLTCAKC			9	1207.65	Lipids	0.005	1209.08	0.071296	0.664992	0.076418	4.94461	0.005997
ATG14L	50	59	TRRRLTCAKC			9	1207.65	Lipids	0.05	1209.51	0.087717	1.09266	0.091928	4.95957	0.00414
ATG14L	50	59	TRRRLTCAKC			9	1207.65	Lipids	0.5	1209.99	0.087875	1.57643	0.09208	4.9612	0.007088
ATG14L	50	59	TRRRLTCAKC			9	1207.65	Lipids	5	1211	0.06984	2.58389	0.075062	4.97436	0.003521
ATG14L	50	59	TRRRLTCAKC			9	1207.65	Lipids	50	1211.43	0.100782	3.00822	0.104469	4.98703	0.005096
ATG14L	58	65	KCVQSGDF			7	883.398	Default State	0	883.591	0	0	0	7.65182	0
ATG14L	58	65	KCVQSGDF			7	883.398	Default State	0.005	884.239	0.008207	0.647977	0.008207	7.6236	0.012129
ATG14L	58	65	KCVQSGDF			7	883.398	Default State	0.05	884.294	0.058463	0.702439	0.058463	7.6315	0.001076
ATG14L	58	65	KCVQSGDF			7	883.398	Default State	0.5	884.548	0.051901	0.956964	0.051901	7.64163	0.005469
ATG14L	58	65	KCVQSGDF			7	883.398	Default State	5	885.429	0.04052	1.83754	0.04052	7.65226	0.006201
ATG14L	58	65	KCVQSGDF			7	883.398	Default State	50	886.396	0.031568	2.80442	0.031568	7.66342	0.000234
ATG14L	58	65	KCVQSGDF			7	883.398	Lipids	0	883.591	0	0	0	7.65182	0
ATG14L	58	65	KCVQSGDF			7	883.398	Lipids	0.005	884.334	0.03956	0.742411	0.03956	7.64218	0.006025
ATG14L	58	65	KCVQSGDF			7	883.398	Lipids	0.05	884.412	0.032983	0.820531	0.032983	7.64792	0.001639
ATG14L	58	65	KCVQSGDF			7	883.398	Lipids	0.5	884.64	0.04791	1.04847	0.04791	7.65214	0.008732
ATG14L	58	65	KCVQSGDF			7	883.398	Lipids	5	885.537	0.026659	1.94541	0.026659	7.6644	0.004999
ATG14L	58	65	KCVQSGDF			7	883.398	Lipids	50	886.413	0.042993	2.82188	0.042993	7.67623	0.001426
ATG14L	65	72	FVYFDGRD			7	1018.46	Default State	0	1019.12	0.035206	0	0	10.0788	0.002594
ATG14L	65	72	FVYFDGRD			7	1018.46	Default State	0.005	1019.98	0.043069	0.864116	0.055627	10.0515	0.014479
ATG14L	65	72	FVYFDGRD			7	1018.46	Default State	0.05	1020.52	0.026306	1.40806	0.043949	10.054	0.003448
ATG14L	65	72	FVYFDGRD			7	1018.46	Default State	0.5	1020.73	0.111943	1.61004	0.117349	10.06	0.005415
ATG14L	65	72	FVYFDGRD			7	1018.46	Default State	5	1021.21	0.078589	2.09868	0.086114	10.081	0.006422
ATG14L	65	72	FVYFDGRD			7	1018.46	Default State	50	1021.77	0.037894	2.65158	0.051725	10.095	0.003468
ATG14L	65	72	FVYFDGRD			7	1018.46	Lipids	0	1019.12	0.035206	0	0	10.0788	0.002594
ATG14L	65	72	FVYFDGRD			7	1018.46	Lipids	0.005	1020	0.067154	0.888823	0.075823	10.0611	0.005521
ATG14L	65	72	FVYFDGRD			7	1018.46	Lipids	0.05	1020.58	0.059213	1.46411	0.068888	10.059	0.005089
ATG14L	65	72	FVYFDGRD			7	1018.46	Lipids	0.5	1020.78	0.040942	1.66446	0.053997	10.0699	0.006339
ATG14L	65	72	FVYFDGRD			7	1018.46	Lipids	5	1021.26	0.044181	2.1467	0.056492	10.0874	0.007997
ATG14L	65	72	FVYFDGRD			7	1018.46	Lipids	50	1021.71	0.068648	2.59967	0.07715	10.1016	0.002593
ATG14L	71	82	RDRERFIDKKER			11	1647.9	Default State	0	1648.65	0	0	0	6.44489	0
ATG14L	71	82	RDRERFIDKKER			11	1647.9	Default State	0.005	1648.99	0.058765	0.346514	0.058765	6.39799	0.017099
ATG14L	71	82	RDRERFIDKKER			11	1647.9	Default State	0.05	1649.22	0.080612	0.572865	0.080612	6.42251	0.004197
ATG14L	71	82	RDRERFIDKKER			11	1647.9	Default State	0.5	1649.48	0.076627	0.833737	0.076627	6.4265	0.013467
ATG14L	71	82	RDRERFIDKKER			11	1647.9	Default State	5	1649.54	0.082658	0.88701	0.082658	6.46494	0.008177
ATG14L	71	82	RDRERFIDKKER			11	1647.9	Default State	50	1649.76	0.071315	1.11592	0.071315	6.50874	0.019524
ATG14L	71	82	RDRERFIDKKER			11	1647.9	Lipids	0	1648.65	0	0	0	6.44489	0
ATG14L	71	82	RDRERFIDKKER			11	1647.9	Lipids	0.005	1649.13	0.00719	0.47693	0.00719	6.42322	0.007562
ATG14L	71	82	RDRERFIDKKER			11	1647.9	Lipids	0.05	1649.23	0.102997	0.585794	0.102997	6.44852	0.003181
ATG14L	71	82	RDRERFIDKKER			11	1647.9	Lipids	0.5	1649.35	0.064733	0.70499	0.064733	6.45901	0.014338
ATG14L	71	82	RDRERFIDKKER			11	1647.9	Lipids	5	1649.59	0.03971	0.938975	0.03971	6.49692	0.011307
ATG14L	71	82	RDRERFIDKKER			11	1647.9	Lipids	50	1649.93	0.03991	1.27716	0.03991	6.54507	0.008334
ATG14L	73	83	RERFIDKKERL			10	1489.86	Default State	0	1490.65	0.082066	0	0	6.06293	0.001325
ATG14L	73	83	RERFIDKKERL			10	1489.86	Default State	0.005	1491.02	0.064496	0.371925	0.104377	6.00592	0.01688
ATG14L	73	83	RERFIDKKERL			10	1489.86	Default State	0.05	1491	0.189136	0.349744	0.206173	6.03651	0.009217
ATG14L	73	83	RERFIDKKERL			10	1489.86	Default State	0.5	1491.15	0.105908	0.498771	0.133983	6.05359	0.013188
ATG14L	73	83	RERFIDKKERL			10	1489.86	Default State	5	1491.62	0.193162	0.967642	0.209872	6.07779	0.007763
ATG14L	73	83	RERFIDKKERL			10	1489.86	Default State	50	1492.75	0.230856	2.10145	0.245009	6.1173	0.009754
ATG14L	73	83	RERFIDKKERL			10	1489.86	Lipids	0	1490.65	0.082066	0	0	6.06293	0.001325
ATG14L	73	83	RERFIDKKERL			10	1489.86	Lipids	0.005	1491	0.035183	0.35267	0.08929	6.03418	0.01013
ATG14L	73	83	RERFIDKKERL			10	1489.86	Lipids	0.05	1491.08	0.046983	0.42932	0.094563	6.05949	0.003916
ATG14L	73	83	RERFIDKKERL			10	1489.86	Lipids	0.5	1491.22	0.091738	0.568698	0.123088	6.07234	0.019694
ATG14L	73	83	RERFIDKKERL			10	1489.86	Lipids	5	1491.52	0.048985	0.867702	0.095574	6.10246	0.009966
ATG14L	73	83	RERFIDKKERL			10	1489.86	Lipids	50	1492.57	0.155031	1.92491	0.175412	6.15278	0.022351
ATG14L	73	86	RERFIDKKERLSRL			13	1846.08	Default State	0	1846.96	0.059869	0	0	6.58399	0.008711
ATG14L	73	86	RERFIDKKERLSRL			13	1846.08	Default State	0.005	1847.38	0.137722	0.420541	0.150172	6.52728	0.02908
ATG14L	73	86	RERFIDKKERLSRL			13	1846.08	Default State	0.05	1847.62	0.073226	0.659693	0.094585	6.54501	0.004652
ATG14L	73	86	RERFIDKKERLSRL			13	1846.08	Default State	0.5	1847.69	0.129662	0.733834	0.142816	6.5823	0.017864
ATG14L	73	86	RERFIDKKERLSRL			13	1846.08	Default State	5	1848.84	0.042437	1.88406	0.073383	6.62661	0.007266
ATG14L	73	86	RERFIDKKERLSRL			13	1846.08	Default State	50	1850.26	0.226413	3.29895	0.234195	6.66995	0.012617
ATG14L	73	86	RERFIDKKERLSRL			13	1846.08	Lipids	0	1846.96	0.059869	0	0	6.58399	0.008711
ATG14L	73	86	RERFIDKKERLSRL			13	1846.08	Lipids	0.005	1847.32	0.150251	0.364035	0.161739	6.53397	0.022688
ATG14L	73	86	RERFIDKKERLSRL			13	1846.08	Lipids	0.05	1847.42	0.092156	0.458118	0.109895	6.5955	0.007603
ATG14L	73	86	RERFIDKKERLSRL			13	1846.08	Lipids	0.5	1847.72	0.084682	0.761705	0.103708	6.60257	0.019144
ATG14L	73	86	RERFIDKKERLSRL			13	1846.08	Lipids	5	1848.9	0.190132	1.94059	0.199335	6.66826	0.011746
ATG14L	73	86	RERFIDKKERLSRL			13	1846.08	Lipids	50	1850.21	0.32076	3.2537	0.326299	6.7239	0.044004
ATG14L	77	83	IDKKERL			6	901.547	Default State	0	902.029	0.060213	0	0	5.22598	0.001052
ATG14L	77	83	IDKKERL			6	901.547	Default State	0.005	902.104	0.059545	0.074495	0.084683	5.22067	0.005103
ATG14L	77	83	IDKKERL			6	901.547	Default State	0.05	902.129	0.075046	0.099236	0.096216	5.2214	0.001493
ATG14L	77	83	IDKKERL			6	901.547	Default State	0.5	902.172	0.037323	0.142719	0.070842	5.22753	0.007917
ATG14L	77	83	IDKKERL			6	901.547	Default State	5	902.334	0.052365	0.304331	0.079798	5.23538	0.003499
ATG14L	77	83	IDKKERL			6	901.547	Default State	50	902.903	0.068314	0.873399	0.091063	5.2423	0.001821
ATG14L	77	83	IDKKERL			6	901.547	Lipids	0	902.029	0.060213	0	0	5.22598	0.001052
ATG14L	77	83	IDKKERL			6	901.547	Lipids	0.005	902.095	0.092162	0.065932	0.110088	5.22712	0.006709
ATG14L	77	83	IDKKERL			6	901.547	Lipids	0.05	902.123	0.025729	0.093169	0.06548	5.23298	0.002683
ATG14L	77	83	IDKKERL			6	901.547	Lipids	0.5	902.174	0.062999	0.144959	0.087146	5.23203	0.007066
ATG14L	77	83	IDKKERL			6	901.547	Lipids	5	902.335	0.108713	0.30512	0.124275	5.2409	0.003488
ATG14L	77	83	IDKKERL			6	901.547	Lipids	50	902.924	0.082095	0.894887	0.10181	5.24904	0.00434
ATG14L	77	86	IDKKERLSRL			9	1257.76	Default State	0	1258.31	0.096117	0	0	6.03285	0.003668
ATG14L	77	86	IDKKERLSRL			9	1257.76	Default State	0.005	1258.57	0.062591	0.255972	0.1147	5.99384	0.012172
ATG14L	77	86	IDKKERLSRL			9	1257.76	Default State	0.05	1258.62	0.061576	0.31329	0.114149	6.01062	0.002839
ATG14L	77	86	IDKKERLSRL			9	1257.76	Default State	0.5	1258.85	0.134518	0.541579	0.165329	6.01864	0.007411
ATG14L	77	86	IDKKERLSRL			9	1257.76	Default State	5	1259.64	0.057116	1.32725	0.111807	6.03379	0.007331
ATG14L	77	86	IDKKERLSRL			9	1257.76	Default State	50	1260.42	0.047491	2.10618	0.10721	6.05729	0.004267
ATG14L	77	86	IDKKERLSRL			9	1257.76	Lipids	0	1258.31	0.096117	0	0	6.03285	0.003668
ATG14L	77	86	IDKKERLSRL			9	1257.76	Lipids	0.005	1258.69	0.006648	0.37499	0.096347	6.0113	0.007971
ATG14L	77	86	IDKKERLSRL			9	1257.76	Lipids	0.05	1258.68	0.06268	0.364233	0.114748	6.03162	0.003312
ATG14L	77	86	IDKKERLSRL			9	1257.76	Lipids	0.5	1258.9	0.091667	0.589657	0.132821	6.0361	0.009406
ATG14L	77	86	IDKKERLSRL			9	1257.76	Lipids	5	1259.66	0.064866	1.34876	0.115957	6.05037	0.006585
ATG14L	77	86	IDKKERLSRL			9	1257.76	Lipids	50	1260.45	0.087671	2.13892	0.130095	6.0695	0.007106
ATG14L	77	92	IDKKERLSRLKSKQEE			15	1987.13	Default State	0	1988.21	0.052215	0	0	5.85097	0.00403
ATG14L	77	92	IDKKERLSRLKSKQEE			15	1987.13	Default State	0.005	1988.9	0.096088	0.693859	0.109358	5.83082	0.00602
ATG14L	77	92	IDKKERLSRLKSKQEE			15	1987.13	Default State	0.05	1989.45	0.072847	1.24346	0.089627	5.83547	0.003723
ATG14L	77	92	IDKKERLSRLKSKQEE			15	1987.13	Default State	0.5	1990.28	0.20189	2.07035	0.208533	5.84329	0.008321
ATG14L	77	92	IDKKERLSRLKSKQEE			15	1987.13	Default State	5	1993.04	0.235524	4.8358	0.241242	5.84305	0.005159
ATG14L	77	92	IDKKERLSRLKSKQEE			15	1987.13	Default State	50	1993.63	0.272247	5.4265	0.277209	5.86247	0.005965
ATG14L	77	92	IDKKERLSRLKSKQEE			15	1987.13	Lipids	0	1988.21	0.052215	0	0	5.85097	0.00403
ATG14L	77	92	IDKKERLSRLKSKQEE			15	1987.13	Lipids	0.005	1988.89	0.085776	0.681898	0.100419	5.84115	0.013606
ATG14L	77	92	IDKKERLSRLKSKQEE			15	1987.13	Lipids	0.05	1989.45	0.060674	1.24125	0.080048	5.84897	0.002358
ATG14L	77	92	IDKKERLSRLKSKQEE			15	1987.13	Lipids	0.5	1990.38	0.122116	2.17178	0.132811	5.8447	0.007643
ATG14L	77	92	IDKKERLSRLKSKQEE			15	1987.13	Lipids	5	1993.07	0.260245	4.86074	0.265431	5.85303	0.007912
ATG14L	77	92	IDKKERLSRLKSKQEE			15	1987.13	Lipids	50	1993.73	0.29271	5.52222	0.297331	5.86972	0.007877
ATG14L	87	98	KSKQEEFQKEVL			11	1492.8	Default State	0	1493.56	0.083017	0	0	7.70727	0.000214
ATG14L	87	98	KSKQEEFQKEVL			11	1492.8	Default State	0.005	1493.86	0.077331	0.30183	0.113455	7.67916	0.002046
ATG14L	87	98	KSKQEEFQKEVL			11	1492.8	Default State	0.05	1493.9	0.10871	0.342152	0.136784	7.68018	0.005897
ATG14L	87	98	KSKQEEFQKEVL			11	1492.8	Default State	0.5	1494.14	0.055328	0.578636	0.099765	7.68852	0.008436
ATG14L	87	98	KSKQEEFQKEVL			11	1492.8	Default State	5	1495.43	0.056572	1.86364	0.10046	7.69969	0.004787
ATG14L	87	98	KSKQEEFQKEVL			11	1492.8	Default State	50	1497.45	0.064937	3.88919	0.105398	7.70721	0.006125
ATG14L	87	98	KSKQEEFQKEVL			11	1492.8	Lipids	0	1493.56	0.083017	0	0	7.70727	0.000214
ATG14L	87	98	KSKQEEFQKEVL			11	1492.8	Lipids	0.005	1493.85	0.054468	0.287428	0.09929	7.6966	0.006505
ATG14L	87	98	KSKQEEFQKEVL			11	1492.8	Lipids	0.05	1493.94	0.057881	0.375778	0.101203	7.70226	0.004956
ATG14L	87	98	KSKQEEFQKEVL			11	1492.8	Lipids	0.5	1494.2	0.05652	0.639101	0.100431	7.70607	0.012333
ATG14L	87	98	KSKQEEFQKEVL			11	1492.8	Lipids	5	1495.6	0.09212	2.03738	0.124008	7.71562	0.006657
ATG14L	87	98	KSKQEEFQKEVL			11	1492.8	Lipids	50	1497.46	0.030073	3.89846	0.088296	7.72586	0.003741
ATG14L	99	109	KAMEGKWITDQ			10	1306.65	Default State	0	1307.19	0	0	0	8.2938	0
ATG14L	99	109	KAMEGKWITDQ			10	1306.65	Default State	0.005	1307.96	0.130189	0.768645	0.130189	8.26059	0.010201
ATG14L	99	109	KAMEGKWITDQ			10	1306.65	Default State	0.05	1309.07	0.058653	1.88536	0.058653	8.26545	0.003405
ATG14L	99	109	KAMEGKWITDQ			10	1306.65	Default State	0.5	1311.39	0.099524	4.20287	0.099524	8.2718	0.008607
ATG14L	99	109	KAMEGKWITDQ			10	1306.65	Default State	5	1312.29	0.127171	5.0983	0.127171	8.28406	0.019912
ATG14L	99	109	KAMEGKWITDQ			10	1306.65	Default State	50	1312.65	0.070981	5.46118	0.070981	8.30979	0.001434
ATG14L	99	109	KAMEGKWITDQ			10	1306.65	Lipids	0	1307.19	0	0	0	8.2938	0
ATG14L	99	109	KAMEGKWITDQ			10	1306.65	Lipids	0.005	1308	0.043953	0.815045	0.043953	8.27854	0.007571
ATG14L	99	109	KAMEGKWITDQ			10	1306.65	Lipids	0.05	1309.09	0.088807	1.90398	0.088807	8.28414	0.000873
ATG14L	99	109	KAMEGKWITDQ			10	1306.65	Lipids	0.5	1311.36	0.037083	4.1663	0.037083	8.28752	0.008998
ATG14L	99	109	KAMEGKWITDQ			10	1306.65	Lipids	5	1312.16	0.125172	4.97074	0.125172	8.30084	0.005905
ATG14L	99	109	KAMEGKWITDQ			10	1306.65	Lipids	50	1312.39	0.066015	5.20498	0.066015	8.30918	0.007839
ATG14L	99	110	KAMEGKWITDQL			11	1419.73	Default State	0	1420.5	0.001434	0	0	10.1594	0.004427
ATG14L	99	110	KAMEGKWITDQL			11	1419.73	Default State	0.005	1421.2	0.164295	0.700786	0.164302	10.1377	0.017036
ATG14L	99	110	KAMEGKWITDQL			11	1419.73	Default State	0.05	1422.56	0.089638	2.06317	0.089649	10.1359	0.005629
ATG14L	99	110	KAMEGKWITDQL			11	1419.73	Default State	0.5	1424.1	0.077742	3.60343	0.077755	10.1412	0.008816
ATG14L	99	110	KAMEGKWITDQL			11	1419.73	Default State	5	1425.31	0.150144	4.81192	0.150151	10.1642	0.010494
ATG14L	99	110	KAMEGKWITDQL			11	1419.73	Default State	50	1425.65	0.248256	5.15096	0.24826	10.1908	0.007962
ATG14L	99	110	KAMEGKWITDQL			11	1419.73	Lipids	0	1420.5	0.001434	0	0	10.1594	0.004427
ATG14L	99	110	KAMEGKWITDQL			11	1419.73	Lipids	0.005	1421.13	0.107662	0.632379	0.107672	10.1453	0.00572
ATG14L	99	110	KAMEGKWITDQL			11	1419.73	Lipids	0.05	1422.61	0.070027	2.10735	0.070041	10.1433	0.005808
ATG14L	99	110	KAMEGKWITDQL			11	1419.73	Lipids	0.5	1424.19	0.090191	3.68998	0.090202	10.1507	0.009476
ATG14L	99	110	KAMEGKWITDQL			11	1419.73	Lipids	5	1425.37	0.077047	4.86666	0.07706	10.1718	0.009423
ATG14L	99	110	KAMEGKWITDQL			11	1419.73	Lipids	50	1425.78	0.067864	5.27535	0.067879	10.1993	0.005406
ATG14L	106	116	ITDQLRWKIMS			10	1390.75	Default State	0	1391.53	0.035749	0	0	10.3109	0.002255
ATG14L	106	116	ITDQLRWKIMS			10	1390.75	Default State	0.005	1391.94	0.065488	0.41965	0.07461	10.2902	0.013943
ATG14L	106	116	ITDQLRWKIMS			10	1390.75	Default State	0.05	1392.36	0.030985	0.83599	0.047308	10.2896	0.003096
ATG14L	106	116	ITDQLRWKIMS			10	1390.75	Default State	0.5	1392.56	0.041083	1.03312	0.054459	10.3033	0.007169
ATG14L	106	116	ITDQLRWKIMS			10	1390.75	Default State	5	1393.69	0.094696	2.16809	0.101219	10.3311	0.013127
ATG14L	106	116	ITDQLRWKIMS			10	1390.75	Default State	50	1394.94	0.110956	3.41023	0.116573	10.3599	0.001766
ATG14L	106	116	ITDQLRWKIMS			10	1390.75	Lipids	0	1391.53	0.035749	0	0	10.3109	0.002255
ATG14L	106	116	ITDQLRWKIMS			10	1390.75	Lipids	0.005	1391.78	0.112704	0.256988	0.118238	10.3081	0.000223
ATG14L	106	116	ITDQLRWKIMS			10	1390.75	Lipids	0.05	1392.34	0.028053	0.812484	0.045442	10.2939	0.003871
ATG14L	106	116	ITDQLRWKIMS			10	1390.75	Lipids	0.5	1392.56	0	1.0368	0.035749	10.2991	0
ATG14L	106	116	ITDQLRWKIMS			10	1390.75	Lipids	5	1393.7	0.104935	2.17271	0.110858	10.3353	0.009224
ATG14L	106	116	ITDQLRWKIMS			10	1390.75	Lipids	50	1395.04	0.067333	3.51733	0.076235	10.3533	0.00343
ATG14L	118	124	KMRIEQL			6	917.524	Default State	0	917.874	0.046902	0	0	8.19218	0.000197
ATG14L	118	124	KMRIEQL			6	917.524	Default State	0.005	918.011	0.062176	0.136522	0.077882	8.1572	0.016053
ATG14L	118	124	KMRIEQL			6	917.524	Default State	0.05	918.049	0.052262	0.174747	0.070222	8.17646	0.003
ATG14L	118	124	KMRIEQL			6	917.524	Default State	0.5	918.054	0.080761	0.180006	0.093393	8.17751	0.006614
ATG14L	118	124	KMRIEQL			6	917.524	Default State	5	918.166	0.067518	0.291644	0.08221	8.20341	0.013229
ATG14L	118	124	KMRIEQL			6	917.524	Default State	50	918.647	0.049677	0.772274	0.06832	8.23078	0.001494
ATG14L	118	124	KMRIEQL			6	917.524	Lipids	0	917.874	0.046902	0	0	8.19218	0.000197
ATG14L	118	124	KMRIEQL			6	917.524	Lipids	0.005	918.098	0.047084	0.22412	0.066459	8.17645	0.004027
ATG14L	118	124	KMRIEQL			6	917.524	Lipids	0.05	918.053	0.051635	0.178573	0.069757	8.18658	0.00285
ATG14L	118	124	KMRIEQL			6	917.524	Lipids	0.5	918.093	0.078856	0.218614	0.09175	8.19892	0.008447
ATG14L	118	124	KMRIEQL			6	917.524	Lipids	5	918.18	0.05741	0.305965	0.074133	8.21783	0.008893
ATG14L	118	124	KMRIEQL			6	917.524	Lipids	50	918.64	0.05506	0.766149	0.072328	8.24969	0.006105
ATG14L	120	134	RIEQLKQTICKGNEE			14	1788.93	Default State	0	1789.88	0.030873	0	0	7.00702	0.003274
ATG14L	120	134	RIEQLKQTICKGNEE			14	1788.93	Default State	0.005	1790.46	0.150982	0.578312	0.154107	6.98608	0.010892
ATG14L	120	134	RIEQLKQTICKGNEE			14	1788.93	Default State	0.05	1790.52	0.094072	0.646966	0.099009	7.0015	0.004024
ATG14L	120	134	RIEQLKQTICKGNEE			14	1788.93	Default State	0.5	1790.71	0.067667	0.82952	0.074377	7.00404	0.006338
ATG14L	120	134	RIEQLKQTICKGNEE			14	1788.93	Default State	5	1791.69	0.085078	1.81186	0.090507	7.00784	0.002928
ATG14L	120	134	RIEQLKQTICKGNEE			14	1788.93	Default State	50	1793.96	0.084278	4.08566	0.089755	7.01619	0.001953
ATG14L	120	134	RIEQLKQTICKGNEE			14	1788.93	Lipids	0	1789.88	0.030873	0	0	7.00702	0.003274
ATG14L	120	134	RIEQLKQTICKGNEE			14	1788.93	Lipids	0.005	1790.57	0.039155	0.69466	0.049862	6.9984	0.008415
ATG14L	120	134	RIEQLKQTICKGNEE			14	1788.93	Lipids	0.05	1790.57	0.069785	0.694668	0.076309	7.0112	0.000846
ATG14L	120	134	RIEQLKQTICKGNEE			14	1788.93	Lipids	0.5	1790.85	0.125155	0.970201	0.128907	7.01102	0.005848
ATG14L	120	134	RIEQLKQTICKGNEE			14	1788.93	Lipids	5	1791.91	0.089516	2.03483	0.094691	7.02136	0.005932
ATG14L	120	134	RIEQLKQTICKGNEE			14	1788.93	Lipids	50	1793.96	0.157307	4.07851	0.160308	7.02444	0.003765
ATG14L	125	135	KQTICKGNEEM			10	1280.6	Default State	0	1281.35	0	0	0	6.23284	0
ATG14L	125	135	KQTICKGNEEM			10	1280.6	Default State	0.005	1281.81	0.033829	0.452168	0.033829	6.21492	0.006182
ATG14L	125	135	KQTICKGNEEM			10	1280.6	Default State	0.05	1281.92	0.052962	0.5696	0.052962	6.22058	0.005785
ATG14L	125	135	KQTICKGNEEM			10	1280.6	Default State	0.5	1282.09	0.059567	0.733687	0.059567	6.2294	0.00369
ATG14L	125	135	KQTICKGNEEM			10	1280.6	Default State	5	1282.92	0.068321	1.56809	0.068321	6.2353	0.005885
ATG14L	125	135	KQTICKGNEEM			10	1280.6	Default State	50	1284.43	0.021153	3.07386	0.021153	6.24774	0.002865
ATG14L	125	135	KQTICKGNEEM			10	1280.6	Lipids	0	1281.35	0	0	0	6.23284	0
ATG14L	125	135	KQTICKGNEEM			10	1280.6	Lipids	0.005	1281.87	0.032876	0.519257	0.032876	6.22463	0.005734
ATG14L	125	135	KQTICKGNEEM			10	1280.6	Lipids	0.05	1281.9	0.036859	0.551222	0.036859	6.23616	0.002377
ATG14L	125	135	KQTICKGNEEM			10	1280.6	Lipids	0.5	1282.09	0.049393	0.737991	0.049393	6.23667	0.005808
ATG14L	125	135	KQTICKGNEEM			10	1280.6	Lipids	5	1283.04	0.032732	1.68637	0.032732	6.24465	0.003963
ATG14L	125	135	KQTICKGNEEM			10	1280.6	Lipids	50	1284.47	0.064949	3.12039	0.064949	6.25455	0.002358
ATG14L	163	181	KEKIQRHNRKLGDLVEKKT			18	2320.36	Default State	0	2321.66	0.016713	0	0	11.6016	0.002452
ATG14L	163	181	KEKIQRHNRKLGDLVEKKT			18	2320.36	Default State	0.005	2322.52	0.09522	0.857839	0.096676	11.5931	0.009039
ATG14L	163	181	KEKIQRHNRKLGDLVEKKT			18	2320.36	Default State	0.05	2324.66	0.092031	2.99277	0.093536	11.5908	0.006233
ATG14L	163	181	KEKIQRHNRKLGDLVEKKT			18	2320.36	Default State	0.5	2326.77	0.125955	5.10383	0.127059	11.5942	0.006258
ATG14L	163	181	KEKIQRHNRKLGDLVEKKT			18	2320.36	Default State	5	2329.34	0.117519	7.67383	0.118701	11.6142	0.011775
ATG14L	163	181	KEKIQRHNRKLGDLVEKKT			18	2320.36	Default State	50	2330.23	0.116351	8.57027	0.117545	11.6403	0.00419
ATG14L	163	181	KEKIQRHNRKLGDLVEKKT			18	2320.36	Lipids	0	2321.66	0.016713	0	0	11.6016	0.002452
ATG14L	163	181	KEKIQRHNRKLGDLVEKKT			18	2320.36	Lipids	0.005	2322.54	0.041399	0.88085	0.044645	11.5871	0.006967
ATG14L	163	181	KEKIQRHNRKLGDLVEKKT			18	2320.36	Lipids	0.05	2324.66	0.126941	2.99528	0.128036	11.5912	0.006802
ATG14L	163	181	KEKIQRHNRKLGDLVEKKT			18	2320.36	Lipids	0.5	2326.8	0.157692	5.13901	0.158575	11.5917	0.004993
ATG14L	163	181	KEKIQRHNRKLGDLVEKKT			18	2320.36	Lipids	5	2329.37	0.095561	7.70398	0.097012	11.6136	0.012494
ATG14L	163	181	KEKIQRHNRKLGDLVEKKT			18	2320.36	Lipids	50	2330.29	0.131897	8.62272	0.132952	11.6442	0.006999
ATG14L	176	184	LVEKKTIDL			8	1058.65	Default State	0	1059.25	0.067835	0	0	7.85727	0.000892
ATG14L	176	184	LVEKKTIDL			8	1058.65	Default State	0.005	1059.51	0.050928	0.265721	0.084825	7.82325	0.01469
ATG14L	176	184	LVEKKTIDL			8	1058.65	Default State	0.05	1059.59	0.050274	0.34257	0.084434	7.83678	0.001882
ATG14L	176	184	LVEKKTIDL			8	1058.65	Default State	0.5	1059.62	0.070081	0.373669	0.097534	7.84667	0.008014
ATG14L	176	184	LVEKKTIDL			8	1058.65	Default State	5	1059.83	0.060869	0.581058	0.09114	7.86476	0.006993
ATG14L	176	184	LVEKKTIDL			8	1058.65	Default State	50	1060.71	0.035616	1.46521	0.076616	7.87796	0.002684
ATG14L	176	184	LVEKKTIDL			8	1058.65	Lipids	0	1059.25	0.067835	0	0	7.85727	0.000892
ATG14L	176	184	LVEKKTIDL			8	1058.65	Lipids	0.005	1059.55	0.050677	0.307495	0.084674	7.84517	0.004145
ATG14L	176	184	LVEKKTIDL			8	1058.65	Lipids	0.05	1059.56	0.050751	0.314984	0.084719	7.85393	0.002569
ATG14L	176	184	LVEKKTIDL			8	1058.65	Lipids	0.5	1059.64	0.045763	0.394901	0.081828	7.85523	0.005635
ATG14L	176	184	LVEKKTIDL			8	1058.65	Lipids	5	1059.88	0.079331	0.634809	0.104379	7.87429	0.006073
ATG14L	176	184	LVEKKTIDL			8	1058.65	Lipids	50	1060.63	0.056913	1.38764	0.088547	7.89081	0.00192
ATG14L	176	186	LVEKKTIDLRS			10	1301.78	Default State	0	1302.47	0	0	0	7.70612	0
ATG14L	176	186	LVEKKTIDLRS			10	1301.78	Default State	0.005	1302.82	0.040841	0.353928	0.040841	7.67363	0.015767
ATG14L	176	186	LVEKKTIDLRS			10	1301.78	Default State	0.05	1303.03	0.026414	0.565104	0.026414	7.68721	0.001814
ATG14L	176	186	LVEKKTIDLRS			10	1301.78	Default State	0.5	1303.09	0.037963	0.623838	0.037963	7.69652	0.005255
ATG14L	176	186	LVEKKTIDLRS			10	1301.78	Default State	5	1303.23	0.053985	0.765185	0.053985	7.71741	0.004884
ATG14L	176	186	LVEKKTIDLRS			10	1301.78	Default State	50	1303.78	0.140214	1.31326	0.140214	7.73905	0.006088
ATG14L	176	186	LVEKKTIDLRS			10	1301.78	Lipids	0	1302.47	0	0	0	7.70612	0
ATG14L	176	186	LVEKKTIDLRS			10	1301.78	Lipids	0.005	1302.86	0.010529	0.391876	0.010529	7.69712	0.006412
ATG14L	176	186	LVEKKTIDLRS			10	1301.78	Lipids	0.05	1303.07	0.097593	0.600603	0.097593	7.70417	0.002493
ATG14L	176	186	LVEKKTIDLRS			10	1301.78	Lipids	0.5	1303.08	0.050892	0.609574	0.050892	7.70711	0.007927
ATG14L	176	186	LVEKKTIDLRS			10	1301.78	Lipids	5	1303.34	0.143821	0.871965	0.143821	7.73015	0.004992
ATG14L	176	186	LVEKKTIDLRS			10	1301.78	Lipids	50	1303.57	0.019056	1.1022	0.019056	7.7554	0.009675
ATG14L	177	184	VEKKTIDL			7	945.562	Default State	0	946.018	0.002496	0	0	7.39116	0.000367
ATG14L	177	184	VEKKTIDL			7	945.562	Default State	0.005	946.282	0.031535	0.263593	0.031633	7.35848	0.011669
ATG14L	177	184	VEKKTIDL			7	945.562	Default State	0.05	946.318	0.034654	0.300142	0.034744	7.37221	0.001975
ATG14L	177	184	VEKKTIDL			7	945.562	Default State	0.5	946.342	0.037867	0.324222	0.037949	7.38444	0.006471
ATG14L	177	184	VEKKTIDL			7	945.562	Default State	5	946.485	0.041475	0.467344	0.04155	7.39396	0.008303
ATG14L	177	184	VEKKTIDL			7	945.562	Default State	50	947.13	0.059893	1.11214	0.059945	7.41427	0.001949
ATG14L	177	184	VEKKTIDL			7	945.562	Lipids	0	946.018	0.002496	0	0	7.39116	0.000367
ATG14L	177	184	VEKKTIDL			7	945.562	Lipids	0.005	946.289	0.01793	0.270797	0.018103	7.37498	0.009231
ATG14L	177	184	VEKKTIDL			7	945.562	Lipids	0.05	946.295	0.022054	0.277434	0.022195	7.38903	0.001909
ATG14L	177	184	VEKKTIDL			7	945.562	Lipids	0.5	946.378	0.040708	0.359832	0.040785	7.39313	0.009
ATG14L	177	184	VEKKTIDL			7	945.562	Lipids	5	946.544	0.041996	0.525877	0.04207	7.4082	0.004113
ATG14L	177	184	VEKKTIDL			7	945.562	Lipids	50	947.179	0.050419	1.16062	0.05048	7.42563	0.005
ATG14L	177	191	VEKKTIDLRSHYERL			14	1887.04	Default State	0	1888.08	0	0	0	7.40697	0
ATG14L	177	191	VEKKTIDLRSHYERL			14	1887.04	Default State	0.005	1888.57	0.081229	0.489031	0.081229	7.37181	0.010904
ATG14L	177	191	VEKKTIDLRSHYERL			14	1887.04	Default State	0.05	1888.76	0.091297	0.678845	0.091297	7.38259	0.002557
ATG14L	177	191	VEKKTIDLRSHYERL			14	1887.04	Default State	0.5	1889.08	0.146294	0.997503	0.146294	7.50008	0.112926
ATG14L	177	191	VEKKTIDLRSHYERL			14	1887.04	Default State	5	1889.74	0.133491	1.65499	0.133491	7.53073	0.098794
ATG14L	177	191	VEKKTIDLRSHYERL			14	1887.04	Default State	50	1890.26	0.361449	2.1824	0.361449	7.54677	0.100967
ATG14L	177	191	VEKKTIDLRSHYERL			14	1887.04	Lipids	0	1888.08	0	0	0	7.40697	0
ATG14L	177	191	VEKKTIDLRSHYERL			14	1887.04	Lipids	0.005	1888.52	2.27374e-13	0.436589	2.27374e-13	7.39241	0
ATG14L	177	191	VEKKTIDLRSHYERL			14	1887.04	Lipids	0.05	1888.75	0.065863	0.67199	0.065863	7.39919	0.00217
ATG14L	177	191	VEKKTIDLRSHYERL			14	1887.04	Lipids	0.5	1888.99	0.041207	0.912091	0.041207	7.40558	0.008302
ATG14L	177	191	VEKKTIDLRSHYERL			14	1887.04	Lipids	5	1889.63	0.028103	1.54515	0.028103	7.41627	0.00482
ATG14L	177	191	VEKKTIDLRSHYERL			14	1887.04	Lipids	50	1890.36	0.299298	2.27405	0.299298	7.56468	0.110305
ATG14L	185	191	RSHYERL			6	960.501	Default State	0	960.966	0.034957	0	0	5.76095	0.000119
ATG14L	185	191	RSHYERL			6	960.501	Default State	0.005	961.134	0.045313	0.167478	0.05723	5.73109	0.018095
ATG14L	185	191	RSHYERL			6	960.501	Default State	0.05	961.206	0.019138	0.239866	0.039852	5.7429	0.005658
ATG14L	185	191	RSHYERL			6	960.501	Default State	0.5	961.293	0.076786	0.326784	0.084369	5.75668	0.008818
ATG14L	185	191	RSHYERL			6	960.501	Default State	5	961.629	0.045837	0.663122	0.057645	5.78831	0.003491
ATG14L	185	191	RSHYERL			6	960.501	Default State	50	961.971	0.03133	1.00462	0.046942	5.81469	0.00699
ATG14L	185	191	RSHYERL			6	960.501	Lipids	0	960.966	0.034957	0	0	5.76095	0.000119
ATG14L	185	191	RSHYERL			6	960.501	Lipids	0.005	961.181	0.029583	0.215086	0.045794	5.76484	0.009165
ATG14L	185	191	RSHYERL			6	960.501	Lipids	0.05	961.198	0.046317	0.23146	0.058028	5.76361	0.008484
ATG14L	185	191	RSHYERL			6	960.501	Lipids	0.5	961.286	0.036982	0.31941	0.050889	5.77149	0.011654
ATG14L	185	191	RSHYERL			6	960.501	Lipids	5	961.671	0.042152	0.704674	0.054761	5.79614	0.011307
ATG14L	185	191	RSHYERL			6	960.501	Lipids	50	961.974	0.026694	1.00731	0.043983	5.84115	0.013774
ATG14L	185	194	RSHYERLANL			9	1258.67	Default State	0	1259.34	0	0	0	7.69445	0
ATG14L	185	194	RSHYERLANL			9	1258.67	Default State	0.005	1259.53	0.076524	0.190877	0.076524	7.63787	0.016878
ATG14L	185	194	RSHYERLANL			9	1258.67	Default State	0.05	1259.51	0.054223	0.172463	0.054223	7.6752	0.004048
ATG14L	185	194	RSHYERLANL			9	1258.67	Default State	0.5	1259.7	0.068179	0.363485	0.068179	7.66664	0.020318
ATG14L	185	194	RSHYERLANL			9	1258.67	Default State	5	1260.03	0.033032	0.687423	0.033032	7.70479	0.016635
ATG14L	185	194	RSHYERLANL			9	1258.67	Default State	50	1260.68	0.08499	1.33726	0.08499	7.74064	0.005931
ATG14L	185	194	RSHYERLANL			9	1258.67	Lipids	0	1259.34	0	0	0	7.69445	0
ATG14L	185	194	RSHYERLANL			9	1258.67	Lipids	0.005	1259.47	0.006252	0.128142	0.006252	7.68196	0.004416
ATG14L	185	194	RSHYERLANL			9	1258.67	Lipids	0.05	1259.54	0.014435	0.202086	0.014435	7.70556	0.043742
ATG14L	185	194	RSHYERLANL			9	1258.67	Lipids	0.5	1259.67	0.009623	0.329804	0.009623	7.713	0.016235
ATG14L	185	194	RSHYERLANL			9	1258.67	Lipids	5	1260.13	0.028633	0.792895	0.028633	7.7075	0.012087
ATG14L	185	194	RSHYERLANL			9	1258.67	Lipids	50	1260.66	0.019871	1.31431	0.019871	7.76501	0.010509
ATG14L	186	201	SHYERLANLRRSHILE			15	1994.07	Default State	0	1995.08	0.021362	0	0	5.26501	0.001498
ATG14L	186	201	SHYERLANLRRSHILE			15	1994.07	Default State	0.005	1996.19	0.167697	1.10913	0.169052	5.2558	0.005873
ATG14L	186	201	SHYERLANLRRSHILE			15	1994.07	Default State	0.05	1996.8	0.125005	1.72131	0.126817	5.2588	0.003155
ATG14L	186	201	SHYERLANLRRSHILE			15	1994.07	Default State	0.5	1997.78	0.242101	2.69694	0.243042	5.26566	0.005558
ATG14L	186	201	SHYERLANLRRSHILE			15	1994.07	Default State	5	1998.41	0.135025	3.32854	0.136705	5.27035	0.004646
ATG14L	186	201	SHYERLANLRRSHILE			15	1994.07	Default State	50	1999.29	0.307828	4.20923	0.308569	5.27818	0.003178
ATG14L	186	201	SHYERLANLRRSHILE			15	1994.07	Lipids	0	1995.08	0.021362	0	0	5.26501	0.001498
ATG14L	186	201	SHYERLANLRRSHILE			15	1994.07	Lipids	0.005	1996.26	0.092411	1.18226	0.094847	5.26598	0.004446
ATG14L	186	201	SHYERLANLRRSHILE			15	1994.07	Lipids	0.05	1996.66	0.12746	1.57545	0.129237	5.27057	0.002026
ATG14L	186	201	SHYERLANLRRSHILE			15	1994.07	Lipids	0.5	1997.7	0.082266	2.61998	0.084994	5.2681	0.005724
ATG14L	186	201	SHYERLANLRRSHILE			15	1994.07	Lipids	5	1998.42	0.13783	3.33801	0.139475	5.27364	0.00592
ATG14L	186	201	SHYERLANLRRSHILE			15	1994.07	Lipids	50	1999.34	0.193847	4.26283	0.19502	5.28185	0.00615
ATG14L	192	202	ANLRRSHILEL			10	1321.77	Default State	0	1322.5	0	0	0	8.85629	0
ATG14L	192	202	ANLRRSHILEL			10	1321.77	Default State	0.005	1322.64	0.008787	0.147431	0.008787	8.78371	0.020981
ATG14L	192	202	ANLRRSHILEL			10	1321.77	Default State	0.05	1322.55	0.126991	0.051584	0.126991	8.81256	0.001531
ATG14L	192	202	ANLRRSHILEL			10	1321.77	Default State	0.5	1322.66	0.037911	0.160691	0.037911	8.82968	0.014246
ATG14L	192	202	ANLRRSHILEL			10	1321.77	Default State	5	1322.66	0.042136	0.164346	0.042136	8.85642	0.014392
ATG14L	192	202	ANLRRSHILEL			10	1321.77	Default State	50	1323	0.091078	0.500595	0.091078	8.88121	0.015491
ATG14L	192	202	ANLRRSHILEL			10	1321.77	Lipids	0	1322.5	0	0	0	8.85629	0
ATG14L	192	202	ANLRRSHILEL			10	1321.77	Lipids	0.005	1322.7	0.001552	0.206247	0.001552	8.81747	0.00534
ATG14L	192	202	ANLRRSHILEL			10	1321.77	Lipids	0.05	1322.67	0.030043	0.173667	0.030043	8.83428	0.005916
ATG14L	192	202	ANLRRSHILEL			10	1321.77	Lipids	0.5	1322.69	0.116493	0.19118	0.116493	8.8455	0.015489
ATG14L	192	202	ANLRRSHILEL			10	1321.77	Lipids	5	1322.61	0.03062	0.11188	0.03062	8.87278	0.010738
ATG14L	192	202	ANLRRSHILEL			10	1321.77	Lipids	50	1323.1	0.020385	0.600796	0.020385	8.92816	0.015224
ATG14L	195	202	RRSHILEL			7	1023.61	Default State	0	1024.21	0.025465	0	0	8.38158	0.001956
ATG14L	195	202	RRSHILEL			7	1023.61	Default State	0.005	1024.33	0.050743	0.123875	0.056774	8.31681	0.019708
ATG14L	195	202	RRSHILEL			7	1023.61	Default State	0.05	1024.31	0.018143	0.104755	0.031267	8.34817	0.003791
ATG14L	195	202	RRSHILEL			7	1023.61	Default State	0.5	1024.33	0.015629	0.124491	0.029878	8.37399	0.02962
ATG14L	195	202	RRSHILEL			7	1023.61	Default State	5	1024.33	0.032758	0.121262	0.041492	8.42626	0.005036
ATG14L	195	202	RRSHILEL			7	1023.61	Default State	50	1024.53	0.020999	0.321451	0.033006	8.48135	0.0177
ATG14L	195	202	RRSHILEL			7	1023.61	Lipids	0	1024.21	0.025465	0	0	8.38158	0.001956
ATG14L	195	202	RRSHILEL			7	1023.61	Lipids	0.005	1024.31	0.02467	0.103281	0.035455	8.36297	0.006908
ATG14L	195	202	RRSHILEL			7	1023.61	Lipids	0.05	1024.33	0.026673	0.125602	0.036877	8.37586	0.009865
ATG14L	195	202	RRSHILEL			7	1023.61	Lipids	0.5	1024.33	0.005567	0.125261	0.026066	8.40132	0.018248
ATG14L	195	202	RRSHILEL			7	1023.61	Lipids	5	1024.35	0.026589	0.143015	0.036816	8.46721	0.027193
ATG14L	195	202	RRSHILEL			7	1023.61	Lipids	50	1024.51	0.033027	0.30614	0.041704	8.52363	0.021817
ATG14L	198	207	HILELTSVIF			9	1171.67	Default State	0	1172.32	0.10644	0	0	7.50414	0.0017
ATG14L	198	207	HILELTSVIF			9	1171.67	Default State	0.005	1172.52	0.046666	0.196386	0.116221	7.45893	0.020222
ATG14L	198	207	HILELTSVIF			9	1171.67	Default State	0.05	1172.69	0.030337	0.365285	0.110679	7.48597	0.003459
ATG14L	198	207	HILELTSVIF			9	1171.67	Default State	0.5	1172.86	0.033061	0.539999	0.111456	7.49378	0.004063
ATG14L	198	207	HILELTSVIF			9	1171.67	Default State	5	1173.51	0.114317	1.1868	0.156198	7.5251	0.007215
ATG14L	198	207	HILELTSVIF			9	1171.67	Default State	50	1173.88	0.085509	1.55384	0.136533	7.55346	0.008198
ATG14L	198	207	HILELTSVIF			9	1171.67	Lipids	0	1172.32	0.10644	0	0	7.50414	0.0017
ATG14L	198	207	HILELTSVIF			9	1171.67	Lipids	0.005	1172.48	0.058539	0.155791	0.121476	7.48774	0.007146
ATG14L	198	207	HILELTSVIF			9	1171.67	Lipids	0.05	1172.7	0.05699	0.376738	0.120737	7.50828	0.004426
ATG14L	198	207	HILELTSVIF			9	1171.67	Lipids	0.5	1172.77	0.081057	0.446726	0.13379	7.51587	0.010862
ATG14L	198	207	HILELTSVIF			9	1171.67	Lipids	5	1173.55	0.075945	1.22272	0.130756	7.53481	0.007678
ATG14L	198	207	HILELTSVIF			9	1171.67	Lipids	50	1173.83	0.059328	1.50236	0.121858	7.59546	0.020218
ATG14L	203	209	TSVIFPI			5	776.455	Default State	0	776.864	0	0	0	12.0712	0
ATG14L	203	209	TSVIFPI			5	776.455	Default State	0.005	776.997	0.030613	0.133086	0.030613	12.0528	0.003772
ATG14L	203	209	TSVIFPI			5	776.455	Default State	0.05	777.172	0.031552	0.307922	0.031552	12.0601	0.006926
ATG14L	203	209	TSVIFPI			5	776.455	Default State	0.5	777.429	0.036081	0.565289	0.036081	12.0587	0.002167
ATG14L	203	209	TSVIFPI			5	776.455	Default State	5	777.99	0.041811	1.12593	0.041811	12.0759	0.010643
ATG14L	203	209	TSVIFPI			5	776.455	Default State	50	778.793	0.023019	1.92852	0.023019	12.0823	0.004505
ATG14L	203	209	TSVIFPI			5	776.455	Lipids	0	776.864	0	0	0	12.0712	0
ATG14L	203	209	TSVIFPI			5	776.455	Lipids	0.005	777.005	0.007309	0.141082	0.007309	12.0517	0.006455
ATG14L	203	209	TSVIFPI			5	776.455	Lipids	0.05	777.216	0.029076	0.351829	0.029076	12.0565	0.00431
ATG14L	203	209	TSVIFPI			5	776.455	Lipids	0.5	777.502	0.052213	0.637774	0.052213	12.0602	0.003946
ATG14L	203	209	TSVIFPI			5	776.455	Lipids	5	778.054	0.012898	1.18958	0.012898	12.0748	0.003836
ATG14L	203	209	TSVIFPI			5	776.455	Lipids	50	778.804	0.076366	1.94043	0.076366	12.0861	0.000996
ATG14L	203	210	TSVIFPIE			6	905.498	Default State	0	905.976	0.004784	0	0	11.9743	0.000952
ATG14L	203	210	TSVIFPIE			6	905.498	Default State	0.005	906.099	0	0.122593	0.004784	11.957	0
ATG14L	203	210	TSVIFPIE			6	905.498	Default State	0.05	906.169	0.053904	0.193175	0.054116	11.9643	0.006039
ATG14L	203	210	TSVIFPIE			6	905.498	Default State	0.5	906.229	0.048079	0.253276	0.048316	11.9626	0.001238
ATG14L	203	210	TSVIFPIE			6	905.498	Default State	5	906.586	0.050378	0.609528	0.050605	11.9786	0.010714
ATG14L	203	210	TSVIFPIE			6	905.498	Default State	50	907.487	0.02484	1.51111	0.025296	11.9807	0.004948
ATG14L	203	210	TSVIFPIE			6	905.498	Lipids	0	905.976	0.004784	0	0	11.9743	0.000952
ATG14L	203	210	TSVIFPIE			6	905.498	Lipids	0.005	906.136	4.68998e-05	0.160122	0.004784	11.9675	0.002498
ATG14L	203	210	TSVIFPIE			6	905.498	Lipids	0.05	906.174	0.030216	0.197737	0.030592	11.9613	0.003412
ATG14L	203	210	TSVIFPIE			6	905.498	Lipids	0.5	906.26	0.031199	0.28423	0.031563	11.9657	0.000843
ATG14L	203	210	TSVIFPIE			6	905.498	Lipids	5	906.612	0.055891	0.635602	0.056095	11.9776	0.006167
ATG14L	203	210	TSVIFPIE			6	905.498	Lipids	50	907.464	0.073045	1.4878	0.073202	11.9841	0.003867
ATG14L	203	211	TSVIFPIEE			7	1034.54	Default State	0	1035.08	0.037212	0	0	11.9066	0.000124
ATG14L	203	211	TSVIFPIEE			7	1034.54	Default State	0.005	1035.52	0.066353	0.43367	0.076075	11.8857	0.007618
ATG14L	203	211	TSVIFPIEE			7	1034.54	Default State	0.05	1035.66	0.029413	0.57438	0.047433	11.8876	0.004355
ATG14L	203	211	TSVIFPIEE			7	1034.54	Default State	0.5	1035.67	0.028062	0.593022	0.046607	11.8885	0.003686
ATG14L	203	211	TSVIFPIEE			7	1034.54	Default State	5	1036.1	0.067116	1.02096	0.076742	11.9056	0.007686
ATG14L	203	211	TSVIFPIEE			7	1034.54	Default State	50	1037	0.122893	1.9133	0.128403	11.9076	0.002898
ATG14L	203	211	TSVIFPIEE			7	1034.54	Lipids	0	1035.08	0.037212	0	0	11.9066	0.000124
ATG14L	203	211	TSVIFPIEE			7	1034.54	Lipids	0.005	1035.53	0.032542	0.45185	0.049434	11.8876	0.010439
ATG14L	203	211	TSVIFPIEE			7	1034.54	Lipids	0.05	1035.66	0.031212	0.577819	0.048569	11.8904	0.007969
ATG14L	203	211	TSVIFPIEE			7	1034.54	Lipids	0.5	1035.74	0.042188	0.656923	0.056255	11.8918	0.006311
ATG14L	203	211	TSVIFPIEE			7	1034.54	Lipids	5	1036.13	0.049705	1.05254	0.062091	11.9058	0.00654
ATG14L	203	211	TSVIFPIEE			7	1034.54	Lipids	50	1037.03	0.068537	1.95112	0.077988	11.9088	0.003476
ATG14L	212	221	VKTGVRDPAD			8	1057.56	Default State	0	1058.06	0	0	0	5.36459	0
ATG14L	212	221	VKTGVRDPAD			8	1057.56	Default State	0.005	1061.38	0.033132	3.31937	0.033132	5.35503	0.003322
ATG14L	212	221	VKTGVRDPAD			8	1057.56	Default State	0.05	1061.44	0.099682	3.3785	0.099682	5.35756	0.002567
ATG14L	212	221	VKTGVRDPAD			8	1057.56	Default State	0.5	1061.41	0.113933	3.34628	0.113933	5.36458	0.002286
ATG14L	212	221	VKTGVRDPAD			8	1057.56	Default State	5	1061.51	0.021898	3.45585	0.021898	5.3658	0.003256
ATG14L	212	221	VKTGVRDPAD			8	1057.56	Default State	50	1061.45	0.042294	3.38855	0.042294	5.37145	0.003047
ATG14L	212	221	VKTGVRDPAD			8	1057.56	Lipids	0	1058.06	0	0	0	5.36459	0
ATG14L	212	221	VKTGVRDPAD			8	1057.56	Lipids	0.005	1061.4	0.084361	3.33901	0.084361	5.36185	0.002649
ATG14L	212	221	VKTGVRDPAD			8	1057.56	Lipids	0.05	1061.43	0.017798	3.37027	0.017798	5.36754	0.002078
ATG14L	212	221	VKTGVRDPAD			8	1057.56	Lipids	0.5	1061.48	0.091695	3.42291	0.091695	5.36396	0.005013
ATG14L	212	221	VKTGVRDPAD			8	1057.56	Lipids	5	1061.48	0.08798	3.421	0.08798	5.3687	0.001752
ATG14L	212	221	VKTGVRDPAD			8	1057.56	Lipids	50	1061.49	0.068017	3.43624	0.068017	5.37555	0.003072
ATG14L	212	227	VKTGVRDPADVSSESD			14	1661.8	Default State	0	1662.66	0.010253	0	0	6.34101	0.000503
ATG14L	212	227	VKTGVRDPADVSSESD			14	1661.8	Default State	0.005	1668.01	0.086533	5.35198	0.087138	6.31728	0.004259
ATG14L	212	227	VKTGVRDPADVSSESD			14	1661.8	Default State	0.05	1668.32	0.104284	5.66724	0.104786	6.32135	0.004101
ATG14L	212	227	VKTGVRDPADVSSESD			14	1661.8	Default State	0.5	1668.27	0.147319	5.61612	0.147675	6.32874	0.002185
ATG14L	212	227	VKTGVRDPADVSSESD			14	1661.8	Default State	5	1668.46	0.176898	5.80485	0.177195	6.3326	0.004737
ATG14L	212	227	VKTGVRDPADVSSESD			14	1661.8	Default State	50	1668.49	0.20911	5.83519	0.209362	6.34405	0.004497
ATG14L	212	227	VKTGVRDPADVSSESD			14	1661.8	Lipids	0	1662.66	0.010253	0	0	6.34101	0.000503
ATG14L	212	227	VKTGVRDPADVSSESD			14	1661.8	Lipids	0.005	1668.07	0.114247	5.41942	0.114706	6.32842	0.006196
ATG14L	212	227	VKTGVRDPADVSSESD			14	1661.8	Lipids	0.05	1668.31	0.089543	5.65657	0.090128	6.33488	0.004194
ATG14L	212	227	VKTGVRDPADVSSESD			14	1661.8	Lipids	0.5	1668.32	0.037019	5.66243	0.038413	6.33202	0.00355
ATG14L	212	227	VKTGVRDPADVSSESD			14	1661.8	Lipids	5	1668.46	0.071237	5.80984	0.071971	6.33942	0.001441
ATG14L	212	227	VKTGVRDPADVSSESD			14	1661.8	Lipids	50	1668.61	0.148649	5.95561	0.149002	6.34781	0.002184
ATG14L	212	230	VKTGVRDPADVSSESDSAM			17	1950.91	Default State	0	1952.07	0.065881	0	0	7.37117	0.000114
ATG14L	212	230	VKTGVRDPADVSSESDSAM			17	1950.91	Default State	0.005	1958.53	0.143798	6.46136	0.158171	7.32809	0.008449
ATG14L	212	230	VKTGVRDPADVSSESDSAM			17	1950.91	Default State	0.05	1958.75	0.092852	6.68566	0.113849	7.33759	0.000831
ATG14L	212	230	VKTGVRDPADVSSESDSAM			17	1950.91	Default State	0.5	1958.74	0.088648	6.67054	0.110448	7.34733	0.00841
ATG14L	212	230	VKTGVRDPADVSSESDSAM			17	1950.91	Default State	5	1958.97	0.096413	6.90342	0.116772	7.35331	0.006925
ATG14L	212	230	VKTGVRDPADVSSESDSAM			17	1950.91	Default State	50	1959.03	0.059361	6.96916	0.08868	7.3654	0.001953
ATG14L	212	230	VKTGVRDPADVSSESDSAM			17	1950.91	Lipids	0	1952.07	0.065881	0	0	7.37117	0.000114
ATG14L	212	230	VKTGVRDPADVSSESDSAM			17	1950.91	Lipids	0.005	1958.71	0.00027	6.64657	0.065881	7.34784	0.004631
ATG14L	212	230	VKTGVRDPADVSSESDSAM			17	1950.91	Lipids	0.05	1958.82	0.020758	6.75033	0.069074	7.34892	0.001111
ATG14L	212	230	VKTGVRDPADVSSESDSAM			17	1950.91	Lipids	0.5	1958.86	0.037204	6.79593	0.07566	7.35079	0.011337
ATG14L	212	230	VKTGVRDPADVSSESDSAM			17	1950.91	Lipids	5	1959.05	0.068055	6.98215	0.094719	7.36339	0.006185
ATG14L	212	230	VKTGVRDPADVSSESDSAM			17	1950.91	Lipids	50	1959.2	0.150095	7.13828	0.163917	7.37124	0.003862
ATG14L	213	235	KTGVRDPADVSSESDSAMTSSTV			21	2327.07	Default State	0	2328.3	0	0	0	7.29648	0
ATG14L	213	235	KTGVRDPADVSSESDSAMTSSTV			21	2327.07	Default State	0.005	2337.52	0.222706	9.22452	0.222706	7.24946	0.006734
ATG14L	213	235	KTGVRDPADVSSESDSAMTSSTV			21	2327.07	Default State	0.05	2337.69	0.174881	9.39052	0.174881	7.25408	0.005508
ATG14L	213	235	KTGVRDPADVSSESDSAMTSSTV			21	2327.07	Default State	0.5	2337.82	0.132623	9.52664	0.132623	7.25676	0.003037
ATG14L	213	235	KTGVRDPADVSSESDSAMTSSTV			21	2327.07	Default State	5	2337.82	0.02544	9.52406	0.02544	7.2662	0.00555
ATG14L	213	235	KTGVRDPADVSSESDSAMTSSTV			21	2327.07	Default State	50	2338.05	0.062109	9.75427	0.062109	7.27548	0.005779
ATG14L	213	235	KTGVRDPADVSSESDSAMTSSTV			21	2327.07	Lipids	0	2328.3	0	0	0	7.29648	0
ATG14L	213	235	KTGVRDPADVSSESDSAMTSSTV			21	2327.07	Lipids	0.005	2337.79	0.041091	9.49675	0.041091	7.26013	0.005984
ATG14L	213	235	KTGVRDPADVSSESDSAMTSSTV			21	2327.07	Lipids	0.05	2337.77	0.217248	9.47143	0.217248	7.26345	0.00482
ATG14L	213	235	KTGVRDPADVSSESDSAMTSSTV			21	2327.07	Lipids	0.5	2337.85	0.202868	9.55235	0.202868	7.26573	0.00371
ATG14L	213	235	KTGVRDPADVSSESDSAMTSSTV			21	2327.07	Lipids	5	2337.9	0.121223	9.60373	0.121223	7.26932	0.003373
ATG14L	213	235	KTGVRDPADVSSESDSAMTSSTV			21	2327.07	Lipids	50	2338.07	0.06914	9.77564	0.06914	7.27696	0.003326
ATG14L	231	238	TSSTVSKL			7	822.457	Default State	0	822.882	0.005352	0	0	6.73983	0.004933
ATG14L	231	238	TSSTVSKL			7	822.457	Default State	0.005	825.589	0.043141	2.70766	0.043471	6.67309	0.014171
ATG14L	231	238	TSSTVSKL			7	822.457	Default State	0.05	825.693	0.04745	2.81197	0.047751	6.68972	0.012982
ATG14L	231	238	TSSTVSKL			7	822.457	Default State	0.5	825.692	0.034471	2.8102	0.034884	6.69941	0.0067
ATG14L	231	238	TSSTVSKL			7	822.457	Default State	5	825.736	0.032005	2.85463	0.032449	6.712	0.005036
ATG14L	231	238	TSSTVSKL			7	822.457	Default State	50	825.833	0.034927	2.95136	0.035335	6.72287	0.005125
ATG14L	231	238	TSSTVSKL			7	822.457	Lipids	0	822.882	0.005352	0	0	6.73983	0.004933
ATG14L	231	238	TSSTVSKL			7	822.457	Lipids	0.005	825.676	0.044432	2.7949	0.044753	6.69903	0.007212
ATG14L	231	238	TSSTVSKL			7	822.457	Lipids	0.05	825.726	0.025997	2.84402	0.026542	6.71029	0.005032
ATG14L	231	238	TSSTVSKL			7	822.457	Lipids	0.5	825.766	0.031671	2.88453	0.03212	6.7026	0.005082
ATG14L	231	238	TSSTVSKL			7	822.457	Lipids	5	825.813	0.034768	2.93148	0.035178	6.72377	0.005762
ATG14L	231	238	TSSTVSKL			7	822.457	Lipids	50	825.807	0.057189	2.92575	0.057438	6.72956	0.005513
ATG14L	231	240	TSSTVSKLAE			9	1022.54	Default State	0	1022.95	0.011182	0	0	6.62675	0.000566
ATG14L	231	240	TSSTVSKLAE			9	1022.54	Default State	0.005	1026.77	0.090128	3.82185	0.090819	6.57449	0.007252
ATG14L	231	240	TSSTVSKLAE			9	1022.54	Default State	0.05	1026.93	0.070952	3.97517	0.071827	6.57831	0.006649
ATG14L	231	240	TSSTVSKLAE			9	1022.54	Default State	0.5	1026.9	0.029662	3.95214	0.031699	6.58598	0.005612
ATG14L	231	240	TSSTVSKLAE			9	1022.54	Default State	5	1026.92	0.06504	3.97078	0.065994	6.59688	0.004351
ATG14L	231	240	TSSTVSKLAE			9	1022.54	Default State	50	1027.01	0.07173	4.06	0.072596	6.60433	0.004393
ATG14L	231	240	TSSTVSKLAE			9	1022.54	Lipids	0	1022.95	0.011182	0	0	6.62675	0.000566
ATG14L	231	240	TSSTVSKLAE			9	1022.54	Lipids	0.005	1026.84	0.029994	3.88887	0.03201	6.58842	0.0058
ATG14L	231	240	TSSTVSKLAE			9	1022.54	Lipids	0.05	1026.92	0.082087	3.96536	0.082845	6.59943	0.005664
ATG14L	231	240	TSSTVSKLAE			9	1022.54	Lipids	0.5	1026.97	0.05703	4.0202	0.058116	6.59151	0.004516
ATG14L	231	240	TSSTVSKLAE			9	1022.54	Lipids	5	1027.03	0.073906	4.07351	0.074747	6.59979	0.001932
ATG14L	231	240	TSSTVSKLAE			9	1022.54	Lipids	50	1027.13	0.069426	4.17882	0.070321	6.6043	0.002737
ATG14L	239	246	AEARRTTY			7	967.496	Default State	0	967.975	0.030259	0	0	5.23418	0.000742
ATG14L	239	246	AEARRTTY			7	967.496	Default State	0.005	971.243	0.010818	3.2688	0.032134	5.23048	0.005557
ATG14L	239	246	AEARRTTY			7	967.496	Default State	0.05	971.281	0.083796	3.30609	0.089092	5.22913	0.002545
ATG14L	239	246	AEARRTTY			7	967.496	Default State	0.5	971.237	0.079431	3.26204	0.084999	5.23778	0.003499
ATG14L	239	246	AEARRTTY			7	967.496	Default State	5	971.324	0.063604	3.34899	0.070435	5.24114	0.003398
ATG14L	239	246	AEARRTTY			7	967.496	Default State	50	971.322	0.086719	3.34735	0.091847	5.24785	0.002197
ATG14L	239	246	AEARRTTY			7	967.496	Lipids	0	967.975	0.030259	0	0	5.23418	0.000742
ATG14L	239	246	AEARRTTY			7	967.496	Lipids	0.005	971.304	0.027143	3.32979	0.040649	5.23797	0.004673
ATG14L	239	246	AEARRTTY			7	967.496	Lipids	0.05	971.289	0.077198	3.31396	0.082916	5.24257	0.002128
ATG14L	239	246	AEARRTTY			7	967.496	Lipids	0.5	971.314	0.054902	3.33966	0.062688	5.23919	0.005772
ATG14L	239	246	AEARRTTY			7	967.496	Lipids	5	971.299	0.134259	3.32473	0.137626	5.24572	0.002503
ATG14L	239	246	AEARRTTY			7	967.496	Lipids	50	971.294	0.071093	3.3196	0.077264	5.25084	0.003622
ATG14L	250	261	RWVCDDHSGDTS			11	1377.55	Default State	0	1378.21	0	0	0	7.17264	0
ATG14L	250	261	RWVCDDHSGDTS			11	1377.55	Default State	0.005	1380.08	0.116994	1.86763	0.116994	7.14815	0.007011
ATG14L	250	261	RWVCDDHSGDTS			11	1377.55	Default State	0.05	1380.67	0.036654	2.46012	0.036654	7.15312	0.005504
ATG14L	250	261	RWVCDDHSGDTS			11	1377.55	Default State	0.5	1380.85	0.038059	2.64578	0.038059	7.15875	0.006603
ATG14L	250	261	RWVCDDHSGDTS			11	1377.55	Default State	5	1380.8	0.032224	2.59259	0.032224	7.17346	0.008627
ATG14L	250	261	RWVCDDHSGDTS			11	1377.55	Default State	50	1380.96	0.032238	2.75492	0.032238	7.18844	0.002254
ATG14L	250	261	RWVCDDHSGDTS			11	1377.55	Lipids	0	1378.21	0	0	0	7.17264	0
ATG14L	250	261	RWVCDDHSGDTS			11	1377.55	Lipids	0.005	1380.09	0.127928	1.87876	0.127928	7.16348	0.007007
ATG14L	250	261	RWVCDDHSGDTS			11	1377.55	Lipids	0.05	1380.83	0.057961	2.61908	0.057961	7.17042	0.012631
ATG14L	250	261	RWVCDDHSGDTS			11	1377.55	Lipids	0.5	1380.84	0.092495	2.63666	0.092495	7.16724	0.009326
ATG14L	250	261	RWVCDDHSGDTS			11	1377.55	Lipids	5	1380.78	0.070691	2.57227	0.070691	7.18161	0.009172
ATG14L	250	261	RWVCDDHSGDTS			11	1377.55	Lipids	50	1380.98	0.038209	2.77067	0.038209	7.19501	0.00341
ATG14L	252	261	VCDDHSGDTS			9	1035.37	Default State	0	1035.97	0.081127	0	0	4.76392	0.000258
ATG14L	252	261	VCDDHSGDTS			9	1035.37	Default State	0.005	1037.39	0.043689	1.42486	0.092143	4.7636	0.00365
ATG14L	252	261	VCDDHSGDTS			9	1035.37	Default State	0.05	1037.75	0.052325	1.77812	0.096538	4.76157	0.005026
ATG14L	252	261	VCDDHSGDTS			9	1035.37	Default State	0.5	1037.77	0.072098	1.80224	0.108535	4.76536	0.004414
ATG14L	252	261	VCDDHSGDTS			9	1035.37	Default State	5	1037.81	0.074883	1.84529	0.110404	4.76797	0.002638
ATG14L	252	261	VCDDHSGDTS			9	1035.37	Default State	50	1037.79	0.060133	1.82701	0.100984	4.76969	0.003989
ATG14L	252	261	VCDDHSGDTS			9	1035.37	Lipids	0	1035.97	0.081127	0	0	4.76392	0.000258
ATG14L	252	261	VCDDHSGDTS			9	1035.37	Lipids	0.005	1037.46	0.101533	1.49531	0.129964	4.77139	0.006051
ATG14L	252	261	VCDDHSGDTS			9	1035.37	Lipids	0.05	1037.78	0.071452	1.81286	0.108107	4.77306	0.003416
ATG14L	252	261	VCDDHSGDTS			9	1035.37	Lipids	0.5	1037.79	0.066633	1.82389	0.104984	4.76784	0.002593
ATG14L	252	261	VCDDHSGDTS			9	1035.37	Lipids	5	1037.81	0.085812	1.84381	0.11809	4.76888	0.003774
ATG14L	252	261	VCDDHSGDTS			9	1035.37	Lipids	50	1037.78	0.057956	1.80843	0.099703	4.77283	0.005022
ATG14L	252	263	VCDDHSGDTSIS			11	1235.48	Default State	0	1236.06	0	0	0	6.06125	0
ATG14L	252	263	VCDDHSGDTSIS			11	1235.48	Default State	0.005	1237.42	0.058454	1.35495	0.058454	6.04567	0.004131
ATG14L	252	263	VCDDHSGDTSIS			11	1235.48	Default State	0.05	1237.79	0.02809	1.72368	0.02809	6.04606	0.002889
ATG14L	252	263	VCDDHSGDTSIS			11	1235.48	Default State	0.5	1237.95	0.019719	1.88271	0.019719	6.05107	0.002147
ATG14L	252	263	VCDDHSGDTSIS			11	1235.48	Default State	5	1238.44	0.081164	2.3799	0.081164	6.05826	0.004543
ATG14L	252	263	VCDDHSGDTSIS			11	1235.48	Default State	50	1238.77	0.034274	2.70535	0.034274	6.06486	0.003379
ATG14L	252	263	VCDDHSGDTSIS			11	1235.48	Lipids	0	1236.06	0	0	0	6.06125	0
ATG14L	252	263	VCDDHSGDTSIS			11	1235.48	Lipids	0.005	1237.47	0.039121	1.40805	0.039121	6.0505	0.005149
ATG14L	252	263	VCDDHSGDTSIS			11	1235.48	Lipids	0.05	1237.85	0.056711	1.7844	0.056711	6.0567	0.00257
ATG14L	252	263	VCDDHSGDTSIS			11	1235.48	Lipids	0.5	1237.96	0.060676	1.90109	0.060676	6.05607	0.005065
ATG14L	252	263	VCDDHSGDTSIS			11	1235.48	Lipids	5	1238.48	0.014991	2.41942	0.014991	6.06199	0.002082
ATG14L	252	263	VCDDHSGDTSIS			11	1235.48	Lipids	50	1238.76	0.022241	2.69494	0.022241	6.06515	0.00165
ATG14L	252	268	VCDDHSGDTSISITGPW			15	1789.77	Default State	0	1790.78	0	0	0	11.5778	0
ATG14L	252	268	VCDDHSGDTSISITGPW			15	1789.77	Default State	0.005	1791.97	0.029381	1.19211	0.029381	11.5633	0.002663
ATG14L	252	268	VCDDHSGDTSISITGPW			15	1789.77	Default State	0.05	1792.36	0.037969	1.57748	0.037969	11.5641	0.00734
ATG14L	252	268	VCDDHSGDTSISITGPW			15	1789.77	Default State	0.5	1792.52	0.04523	1.73774	0.04523	11.5672	0.001673
ATG14L	252	268	VCDDHSGDTSISITGPW			15	1789.77	Default State	5	1793.28	0.069579	2.5053	0.069579	11.5886	0.007865
ATG14L	252	268	VCDDHSGDTSISITGPW			15	1789.77	Default State	50	1794.45	0.076472	3.66791	0.076472	11.5964	0.003471
ATG14L	252	268	VCDDHSGDTSISITGPW			15	1789.77	Lipids	0	1790.78	0	0	0	11.5778	0
ATG14L	252	268	VCDDHSGDTSISITGPW			15	1789.77	Lipids	0.005	1792	0.096249	1.21917	0.096249	11.566	0.003178
ATG14L	252	268	VCDDHSGDTSISITGPW			15	1789.77	Lipids	0.05	1792.36	0.070761	1.57996	0.070761	11.5638	0.007173
ATG14L	252	268	VCDDHSGDTSISITGPW			15	1789.77	Lipids	0.5	1792.57	0.065522	1.79314	0.065522	11.5667	0.004121
ATG14L	252	268	VCDDHSGDTSISITGPW			15	1789.77	Lipids	5	1793.31	0.030987	2.5334	0.030987	11.5822	0.00766
ATG14L	252	268	VCDDHSGDTSISITGPW			15	1789.77	Lipids	50	1794.46	0.059167	3.68557	0.059167	11.6006	0.00044
ATG14L	252	276	VCDDHSGDTSISITGPWISLPNNGD			22	2600.16	Default State	0	2601.7	0	0	0	12.0724	0
ATG14L	252	276	VCDDHSGDTSISITGPWISLPNNGD			22	2600.16	Default State	0.005	2603.36	0.1122	1.66771	0.1122	12.0615	0.004728
ATG14L	252	276	VCDDHSGDTSISITGPWISLPNNGD			22	2600.16	Default State	0.05	2604.01	0.036215	2.31875	0.036215	12.0609	0.004145
ATG14L	252	276	VCDDHSGDTSISITGPWISLPNNGD			22	2600.16	Default State	0.5	2604.31	0.057094	2.60984	0.057094	12.0621	0.001808
ATG14L	252	276	VCDDHSGDTSISITGPWISLPNNGD			22	2600.16	Default State	5	2605.38	0.05903	3.68464	0.05903	12.0777	0.012226
ATG14L	252	276	VCDDHSGDTSISITGPWISLPNNGD			22	2600.16	Default State	50	2606.82	0.016382	5.12322	0.016382	12.0836	0.000775
ATG14L	252	276	VCDDHSGDTSISITGPWISLPNNGD			22	2600.16	Lipids	0	2601.7	0	0	0	12.0724	0
ATG14L	252	276	VCDDHSGDTSISITGPWISLPNNGD			22	2600.16	Lipids	0.005	2603.2	0.026862	1.50789	0.026862	12.0555	0.006498
ATG14L	252	276	VCDDHSGDTSISITGPWISLPNNGD			22	2600.16	Lipids	0.05	2603.93	0.039344	2.23835	0.039344	12.055	0.002719
ATG14L	252	276	VCDDHSGDTSISITGPWISLPNNGD			22	2600.16	Lipids	0.5	2604.44	0.230173	2.74432	0.230173	12.06	0.001043
ATG14L	252	276	VCDDHSGDTSISITGPWISLPNNGD			22	2600.16	Lipids	5	2605.42	0.045932	3.72088	0.045932	12.0686	0.004804
ATG14L	252	276	VCDDHSGDTSISITGPWISLPNNGD			22	2600.16	Lipids	50	2606.92	0.104983	5.22543	0.104983	12.0832	0.002142
ATG14L	262	268	ISITGPW			5	773.419	Default State	0	773.853	0	0	0	12.4781	0
ATG14L	262	268	ISITGPW			5	773.419	Default State	0.005	773.988	0.018516	0.135285	0.018516	12.4566	0.000424
ATG14L	262	268	ISITGPW			5	773.419	Default State	0.05	774.013	0.0176	0.159917	0.0176	12.4584	0.003626
ATG14L	262	268	ISITGPW			5	773.419	Default State	0.5	774.028	0.011026	0.175497	0.011026	12.4671	0.002725
ATG14L	262	268	ISITGPW			5	773.419	Default State	5	774.316	0.010284	0.463284	0.010284	12.4886	0.00208
ATG14L	262	268	ISITGPW			5	773.419	Default State	50	775.133	0.013173	1.27977	0.013173	12.4967	0.000718
ATG14L	262	268	ISITGPW			5	773.419	Lipids	0	773.853	0	0	0	12.4781	0
ATG14L	262	268	ISITGPW			5	773.419	Lipids	0.005	774.002	0.021506	0.148932	0.021506	12.4636	0.014659
ATG14L	262	268	ISITGPW			5	773.419	Lipids	0.05	773.999	0.026139	0.146545	0.026139	12.4666	0.010353
ATG14L	262	268	ISITGPW			5	773.419	Lipids	0.5	774.044	0.019928	0.191485	0.019928	12.466	0.010347
ATG14L	262	268	ISITGPW			5	773.419	Lipids	5	774.284	0.012656	0.430591	0.012656	12.4831	0.010906
ATG14L	262	268	ISITGPW			5	773.419	Lipids	50	775.152	0.002332	1.29919	0.002332	12.5014	0.007759
ATG14L	262	276	ISITGPWISLPNNGD			12	1583.81	Default State	0	1584.57	0	0	0	12.7819	0
ATG14L	262	276	ISITGPWISLPNNGD			12	1583.81	Default State	0.005	1585.5	0.085702	0.927034	0.085702	12.7636	0.004236
ATG14L	262	276	ISITGPWISLPNNGD			12	1583.81	Default State	0.05	1585.88	0.085212	1.30723	0.085212	12.775	0.01156
ATG14L	262	276	ISITGPWISLPNNGD			12	1583.81	Default State	0.5	1586.08	0.085954	1.50309	0.085954	12.7739	0.005881
ATG14L	262	276	ISITGPWISLPNNGD			12	1583.81	Default State	5	1586.55	0.115241	1.97643	0.115241	12.8131	0.02842
ATG14L	262	276	ISITGPWISLPNNGD			12	1583.81	Default State	50	1588.01	0.047273	3.43463	0.047273	12.8002	0.00147
ATG14L	262	276	ISITGPWISLPNNGD			12	1583.81	Lipids	0	1584.57	0	0	0	12.7819	0
ATG14L	262	276	ISITGPWISLPNNGD			12	1583.81	Lipids	0.005	1585.49	0.042458	0.914608	0.042458	12.7652	0.00672
ATG14L	262	276	ISITGPWISLPNNGD			12	1583.81	Lipids	0.05	1585.89	0.084807	1.31804	0.084807	12.7693	0.011162
ATG14L	262	276	ISITGPWISLPNNGD			12	1583.81	Lipids	0.5	1586.1	0.21865	1.52852	0.21865	12.7832	0.01974
ATG14L	262	276	ISITGPWISLPNNGD			12	1583.81	Lipids	5	1586.7	0.04302	2.12602	0.04302	12.7785	0.012224
ATG14L	262	276	ISITGPWISLPNNGD			12	1583.81	Lipids	50	1588.02	0.000993	3.44257	0.000993	12.7962	0.002971
ATG14L	262	277	ISITGPWISLPNNGDY			13	1746.87	Default State	0	1747.9	0	0	0	13.1063	0
ATG14L	262	277	ISITGPWISLPNNGDY			13	1746.87	Default State	0.005	1749.01	0.082074	1.11296	0.082074	13.1252	0.001168
ATG14L	262	277	ISITGPWISLPNNGDY			13	1746.87	Default State	0.05	1749.65	0.059567	1.75279	0.059567	13.1283	0.00244
ATG14L	262	277	ISITGPWISLPNNGDY			13	1746.87	Default State	0.5	1749.89	0.093811	1.98618	0.093811	13.1262	0.005155
ATG14L	262	277	ISITGPWISLPNNGDY			13	1746.87	Default State	5	1750.42	0.029456	2.52509	0.029456	13.1356	0.006255
ATG14L	262	277	ISITGPWISLPNNGDY			13	1746.87	Default State	50	1751.83	0.018348	3.93526	0.018348	13.1367	0.004957
ATG14L	262	277	ISITGPWISLPNNGDY			13	1746.87	Lipids	0	1747.9	0	0	0	13.1063	0
ATG14L	262	277	ISITGPWISLPNNGDY			13	1746.87	Lipids	0.005	1749.1	0.122615	1.20415	0.122615	13.1173	0.005641
ATG14L	262	277	ISITGPWISLPNNGDY			13	1746.87	Lipids	0.05	1749.65	0.019001	1.74972	0.019001	13.1306	0.005978
ATG14L	262	277	ISITGPWISLPNNGDY			13	1746.87	Lipids	0.5	1749.99	0.101982	2.0919	0.101982	13.1202	0.000825
ATG14L	262	277	ISITGPWISLPNNGDY			13	1746.87	Lipids	5	1750.5	0.027578	2.60153	0.027578	13.1223	0.007379
ATG14L	262	277	ISITGPWISLPNNGDY			13	1746.87	Lipids	50	1751.87	0.00337	3.97161	0.00337	13.1341	0.002877
ATG14L	262	279	ISITGPWISLPNNGDYSA			15	1904.94	Default State	0	1905.94	0.007611	0	0	12.963	3.29061e-05
ATG14L	262	279	ISITGPWISLPNNGDYSA			15	1904.94	Default State	0.005	1907.61	0.197505	1.67053	0.197652	12.946	0.004007
ATG14L	262	279	ISITGPWISLPNNGDYSA			15	1904.94	Default State	0.05	1908.51	0.186039	2.57377	0.186195	12.9516	0.003721
ATG14L	262	279	ISITGPWISLPNNGDYSA			15	1904.94	Default State	0.5	1908.91	0.241826	2.96902	0.241946	12.9463	0.003017
ATG14L	262	279	ISITGPWISLPNNGDYSA			15	1904.94	Default State	5	1909.53	0.093843	3.59239	0.094151	12.9573	0.011331
ATG14L	262	279	ISITGPWISLPNNGDYSA			15	1904.94	Default State	50	1910.89	0.166825	4.95452	0.166999	12.9604	0.004874
ATG14L	262	279	ISITGPWISLPNNGDYSA			15	1904.94	Lipids	0	1905.94	0.007611	0	0	12.963	3.29061e-05
ATG14L	262	279	ISITGPWISLPNNGDYSA			15	1904.94	Lipids	0.005	1907.63	0.253685	1.69318	0.253799	12.9394	0.004028
ATG14L	262	279	ISITGPWISLPNNGDYSA			15	1904.94	Lipids	0.05	1908.52	0.219297	2.58039	0.219429	12.9474	0.004119
ATG14L	262	279	ISITGPWISLPNNGDYSA			15	1904.94	Lipids	0.5	1909.05	0.190746	3.10583	0.190898	12.9426	0.005737
ATG14L	262	279	ISITGPWISLPNNGDYSA			15	1904.94	Lipids	5	1909.61	0.100224	3.67496	0.100512	12.947	0.006276
ATG14L	262	279	ISITGPWISLPNNGDYSA			15	1904.94	Lipids	50	1911.02	0.15563	5.07615	0.155816	12.9571	0.002973
ATG14L	262	280	ISITGPWISLPNNGDYSAY			16	2068	Default State	0	2069.2	0	0	0	13.1544	0
ATG14L	262	280	ISITGPWISLPNNGDYSAY			16	2068	Default State	0.005	2070.86	0.133184	1.66226	0.133184	13.168	0.002409
ATG14L	262	280	ISITGPWISLPNNGDYSAY			16	2068	Default State	0.05	2071.72	0.063276	2.51482	0.063276	13.1702	0.001673
ATG14L	262	280	ISITGPWISLPNNGDYSAY			16	2068	Default State	0.5	2072.23	0.132305	3.02968	0.132305	13.1726	0.003234
ATG14L	262	280	ISITGPWISLPNNGDYSAY			16	2068	Default State	5	2073.2	0.017811	4.00137	0.017811	13.1778	0.00561
ATG14L	262	280	ISITGPWISLPNNGDYSAY			16	2068	Default State	50	2074.77	0.018689	5.56978	0.018689	13.1754	0.009682
ATG14L	262	280	ISITGPWISLPNNGDYSAY			16	2068	Lipids	0	2069.2	0	0	0	13.1544	0
ATG14L	262	280	ISITGPWISLPNNGDYSAY			16	2068	Lipids	0.005	2070.89	0.117084	1.68702	0.117084	13.1584	0.005514
ATG14L	262	280	ISITGPWISLPNNGDYSAY			16	2068	Lipids	0.05	2071.74	0.047926	2.54091	0.047926	13.1762	0.007148
ATG14L	262	280	ISITGPWISLPNNGDYSAY			16	2068	Lipids	0.5	2072.33	0.182755	3.12655	0.182755	13.1637	0.001085
ATG14L	262	280	ISITGPWISLPNNGDYSAY			16	2068	Lipids	5	2073.31	0.049539	4.11285	0.049539	13.1628	0.007981
ATG14L	262	280	ISITGPWISLPNNGDYSAY			16	2068	Lipids	50	2074.8	0.025814	5.60346	0.025814	13.1744	0.005414
ATG14L	264	280	ITGPWISLPNNGDYSAY			14	1867.89	Default State	0	1868.9	0.094743	0	0	12.8116	0.001724
ATG14L	264	280	ITGPWISLPNNGDYSAY			14	1867.89	Default State	0.005	1870.68	0.182795	1.78626	0.205889	12.7996	0.0018
ATG14L	264	280	ITGPWISLPNNGDYSAY			14	1867.89	Default State	0.05	1871.55	0.179892	2.65006	0.203315	12.7997	0.006159
ATG14L	264	280	ITGPWISLPNNGDYSAY			14	1867.89	Default State	0.5	1872.07	0.20682	3.17664	0.227488	12.7996	0.002777
ATG14L	264	280	ITGPWISLPNNGDYSAY			14	1867.89	Default State	5	1872.93	0.20647	4.03424	0.227169	12.8188	0.005627
ATG14L	264	280	ITGPWISLPNNGDYSAY			14	1867.89	Default State	50	1874.21	0.101136	5.31264	0.138581	12.82	0.002356
ATG14L	264	280	ITGPWISLPNNGDYSAY			14	1867.89	Lipids	0	1868.9	0.094743	0	0	12.8116	0.001724
ATG14L	264	280	ITGPWISLPNNGDYSAY			14	1867.89	Lipids	0.005	1870.72	0.213253	1.8288	0.233352	12.7974	0.006614
ATG14L	264	280	ITGPWISLPNNGDYSAY			14	1867.89	Lipids	0.05	1871.57	0.172294	2.66983	0.196625	12.7982	0.011412
ATG14L	264	280	ITGPWISLPNNGDYSAY			14	1867.89	Lipids	0.5	1872.19	0.270663	3.29901	0.286765	12.7983	0.004479
ATG14L	264	280	ITGPWISLPNNGDYSAY			14	1867.89	Lipids	5	1873.08	0.168912	4.18616	0.193668	12.8104	0.009901
ATG14L	264	280	ITGPWISLPNNGDYSAY			14	1867.89	Lipids	50	1874.28	0.20535	5.38753	0.226152	12.8173	0.002562
ATG14L	284	295	VEEKKTTQGPDM			10	1362.66	Default State	0	1363.37	0.05778	0	0	5.72182	0.000492
ATG14L	284	295	VEEKKTTQGPDM			10	1362.66	Default State	0.005	1367.1	0.094405	3.72928	0.110684	5.70605	0.004743
ATG14L	284	295	VEEKKTTQGPDM			10	1362.66	Default State	0.05	1367.11	0.055438	3.73687	0.080075	5.70695	0.003693
ATG14L	284	295	VEEKKTTQGPDM			10	1362.66	Default State	0.5	1367.16	0.077472	3.78585	0.096646	5.71525	0.002481
ATG14L	284	295	VEEKKTTQGPDM			10	1362.66	Default State	5	1367.25	0.117617	3.88	0.131043	5.72679	0.004539
ATG14L	284	295	VEEKKTTQGPDM			10	1362.66	Default State	50	1367.21	0.075868	3.84309	0.095365	5.73807	0.002952
ATG14L	284	295	VEEKKTTQGPDM			10	1362.66	Lipids	0	1363.37	0.05778	0	0	5.72182	0.000492
ATG14L	284	295	VEEKKTTQGPDM			10	1362.66	Lipids	0.005	1367.12	0.07669	3.75105	0.096021	5.71795	0.004291
ATG14L	284	295	VEEKKTTQGPDM			10	1362.66	Lipids	0.05	1367.15	0.074424	3.78262	0.094221	5.72153	0.002709
ATG14L	284	295	VEEKKTTQGPDM			10	1362.66	Lipids	0.5	1367.13	0.090654	3.75967	0.107502	5.71918	0.004403
ATG14L	284	295	VEEKKTTQGPDM			10	1362.66	Lipids	5	1367.23	0.137464	3.86208	0.149114	5.73172	0.006071
ATG14L	284	295	VEEKKTTQGPDM			10	1362.66	Lipids	50	1367.18	0.092783	3.80674	0.109303	5.73994	0.002706
ATG14L	291	302	QGPDMEQSNPAY			9	1336.55	Default State	0	1337.35	0	0	0	10.7368	0
ATG14L	291	302	QGPDMEQSNPAY			9	1336.55	Default State	0.005	1338.85	0.069384	1.49493	0.069384	10.726	0.011114
ATG14L	291	302	QGPDMEQSNPAY			9	1336.55	Default State	0.05	1339.15	0.048279	1.80229	0.048279	10.7287	0.004819
ATG14L	291	302	QGPDMEQSNPAY			9	1336.55	Default State	0.5	1339.34	0.058595	1.99169	0.058595	10.7335	0.006073
ATG14L	291	302	QGPDMEQSNPAY			9	1336.55	Default State	5	1340.02	0.063638	2.66961	0.063638	10.7594	0.012725
ATG14L	291	302	QGPDMEQSNPAY			9	1336.55	Default State	50	1340.59	0.089822	3.23891	0.089822	10.7724	0.004054
ATG14L	291	302	QGPDMEQSNPAY			9	1336.55	Lipids	0	1337.35	0	0	0	10.7368	0
ATG14L	291	302	QGPDMEQSNPAY			9	1336.55	Lipids	0.005	1338.93	0.11396	1.58096	0.11396	10.7305	0.001351
ATG14L	291	302	QGPDMEQSNPAY			9	1336.55	Lipids	0.05	1339.22	0.023559	1.86666	0.023559	10.7291	0.003103
ATG14L	291	302	QGPDMEQSNPAY			9	1336.55	Lipids	0.5	1339.41	0.024366	2.06278	0.024366	10.7413	0.0073
ATG14L	291	302	QGPDMEQSNPAY			9	1336.55	Lipids	5	1340.01	0.101493	2.65905	0.101493	10.76	0.008268
ATG14L	291	302	QGPDMEQSNPAY			9	1336.55	Lipids	50	1340.66	0.067302	3.30756	0.067302	10.7784	0.000529
ATG14L	316	323	NILSHILD			7	924.515	Default State	0	924.948	0.031861	0	0	11.8391	0.004462
ATG14L	316	323	NILSHILD			7	924.515	Default State	0.005	925.038	0.028096	0.090096	0.04248	11.8116	0.009313
ATG14L	316	323	NILSHILD			7	924.515	Default State	0.05	925.061	0.025985	0.1132	0.041114	11.8212	0.004159
ATG14L	316	323	NILSHILD			7	924.515	Default State	0.5	925.053	0.064346	0.10463	0.071802	11.8297	0.005802
ATG14L	316	323	NILSHILD			7	924.515	Default State	5	925.042	0.063705	0.094042	0.071228	11.8592	0.010998
ATG14L	316	323	NILSHILD			7	924.515	Default State	50	925.076	0.021928	0.12801	0.038678	11.8821	0.0073
ATG14L	316	323	NILSHILD			7	924.515	Lipids	0	924.948	0.031861	0	0	11.8391	0.004462
ATG14L	316	323	NILSHILD			7	924.515	Lipids	0.005	925.021	0.015416	0.072975	0.035395	11.814	0.006747
ATG14L	316	323	NILSHILD			7	924.515	Lipids	0.05	925.044	0.043187	0.095404	0.053668	11.8251	0.003606
ATG14L	316	323	NILSHILD			7	924.515	Lipids	0.5	925.056	0.021647	0.107573	0.038519	11.8302	0.005869
ATG14L	316	323	NILSHILD			7	924.515	Lipids	5	925.057	0.024336	0.10843	0.040092	11.855	0.010198
ATG14L	316	323	NILSHILD			7	924.515	Lipids	50	925.089	0.081922	0.140916	0.087899	11.8896	0.007858
ATG14L	316	335	NILSHILDVNLPKKLCNSEF			18	2297.23	Default State	0	2298.43	0	0	0	12.6122	0
ATG14L	316	335	NILSHILDVNLPKKLCNSEF			18	2297.23	Default State	0.005	2300.46	0.155593	2.02617	0.155593	12.5897	0.006919
ATG14L	316	335	NILSHILDVNLPKKLCNSEF			18	2297.23	Default State	0.05	2301.5	0.079522	3.06934	0.079522	12.6046	0.004734
ATG14L	316	335	NILSHILDVNLPKKLCNSEF			18	2297.23	Default State	0.5	2302.25	0.320381	3.82038	0.320381	12.6189	0.019897
ATG14L	316	335	NILSHILDVNLPKKLCNSEF			18	2297.23	Default State	5	2302.96	0.062919	4.52275	0.062919	12.6703	0.012933
ATG14L	316	335	NILSHILDVNLPKKLCNSEF			18	2297.23	Default State	50	2303.54	0.13122	5.10752	0.13122	12.7395	0.028844
ATG14L	316	335	NILSHILDVNLPKKLCNSEF			18	2297.23	Lipids	0	2298.43	0	0	0	12.6122	0
ATG14L	316	335	NILSHILDVNLPKKLCNSEF			18	2297.23	Lipids	0.005	2300.61	0.166335	2.1757	0.166335	12.5825	0.003256
ATG14L	316	335	NILSHILDVNLPKKLCNSEF			18	2297.23	Lipids	0.05	2301.4	0.0949	2.96744	0.0949	12.611	0.005514
ATG14L	316	335	NILSHILDVNLPKKLCNSEF			18	2297.23	Lipids	0.5	2302.18	0.112508	3.74958	0.112508	12.6129	0.007358
ATG14L	316	335	NILSHILDVNLPKKLCNSEF			18	2297.23	Lipids	5	2303.14	0.058033	4.71014	0.058033	12.6604	0.007851
ATG14L	316	335	NILSHILDVNLPKKLCNSEF			18	2297.23	Lipids	50	2303.56	0.130703	5.12277	0.130703	12.7432	0.045218
ATG14L	317	323	ILSHILD			6	810.472	Default State	0	810.846	0	0	0	11.8345	0
ATG14L	317	323	ILSHILD			6	810.472	Default State	0.005	810.932	0.028688	0.085965	0.028688	11.8128	0.00955
ATG14L	317	323	ILSHILD			6	810.472	Default State	0.05	810.936	0.020015	0.089389	0.020015	11.8256	0.003558
ATG14L	317	323	ILSHILD			6	810.472	Default State	0.5	810.927	0.029455	0.080763	0.029455	11.83	0.005447
ATG14L	317	323	ILSHILD			6	810.472	Default State	5	810.946	0.042433	0.099843	0.042433	11.8601	0.013127
ATG14L	317	323	ILSHILD			6	810.472	Default State	50	810.958	0.041862	0.111416	0.041862	11.8855	0.006293
ATG14L	317	323	ILSHILD			6	810.472	Lipids	0	810.846	0	0	0	11.8345	0
ATG14L	317	323	ILSHILD			6	810.472	Lipids	0.005	810.911	0.023153	0.065142	0.023153	11.8152	0.004956
ATG14L	317	323	ILSHILD			6	810.472	Lipids	0.05	810.953	0.026863	0.106529	0.026863	11.8248	0.005411
ATG14L	317	323	ILSHILD			6	810.472	Lipids	0.5	810.93	0.031764	0.083492	0.031764	11.8336	0.006351
ATG14L	317	323	ILSHILD			6	810.472	Lipids	5	810.94	0.019245	0.093374	0.019245	11.8548	0.009742
ATG14L	317	323	ILSHILD			6	810.472	Lipids	50	810.981	0.03991	0.134479	0.03991	11.8913	0.007007
ATG14L	324	335	VNLPKKLCNSEF			10	1391.74	Default State	0	1392.41	0	0	0	9.37148	0
ATG14L	324	335	VNLPKKLCNSEF			10	1391.74	Default State	0.005	1394.14	0.096798	1.73569	0.096798	9.34252	0.010839
ATG14L	324	335	VNLPKKLCNSEF			10	1391.74	Default State	0.05	1394.98	0.035856	2.56728	0.035856	9.34418	0.00323
ATG14L	324	335	VNLPKKLCNSEF			10	1391.74	Default State	0.5	1395.6	0.116404	3.18991	0.116404	9.35494	0.010381
ATG14L	324	335	VNLPKKLCNSEF			10	1391.74	Default State	5	1396.49	0.074092	4.08303	0.074092	9.37949	0.009485
ATG14L	324	335	VNLPKKLCNSEF			10	1391.74	Default State	50	1397	0.014355	4.59302	0.014355	9.39348	0.010125
ATG14L	324	335	VNLPKKLCNSEF			10	1391.74	Lipids	0	1392.41	0	0	0	9.37148	0
ATG14L	324	335	VNLPKKLCNSEF			10	1391.74	Lipids	0.005	1394.26	0.099409	1.84699	0.099409	9.35339	0.004865
ATG14L	324	335	VNLPKKLCNSEF			10	1391.74	Lipids	0.05	1395.03	0.153802	2.62443	0.153802	9.34308	0.009967
ATG14L	324	335	VNLPKKLCNSEF			10	1391.74	Lipids	0.5	1395.65	0.027242	3.23751	0.027242	9.3661	0.010477
ATG14L	324	335	VNLPKKLCNSEF			10	1391.74	Lipids	5	1396.66	0.029722	4.24748	0.029722	9.38048	0.009838
ATG14L	324	335	VNLPKKLCNSEF			10	1391.74	Lipids	50	1397.09	0.082531	4.68506	0.082531	9.40358	0.008229
ATG14L	336	354	CGENLSKQKFTRAVKKLNA			18	2135.18	Default State	0	2136.28	0.022899	0	0	6.96689	0.005133
ATG14L	336	354	CGENLSKQKFTRAVKKLNA			18	2135.18	Default State	0.005	2137.71	0.230191	1.42733	0.231327	6.93559	0.011449
ATG14L	336	354	CGENLSKQKFTRAVKKLNA			18	2135.18	Default State	0.05	2138.57	0.168373	2.28224	0.169923	6.94933	0.004945
ATG14L	336	354	CGENLSKQKFTRAVKKLNA			18	2135.18	Default State	0.5	2138.92	0.173056	2.63574	0.174564	6.95521	0.006326
ATG14L	336	354	CGENLSKQKFTRAVKKLNA			18	2135.18	Default State	5	2140.28	0.034504	4.00016	0.041411	6.95518	0.002628
ATG14L	336	354	CGENLSKQKFTRAVKKLNA			18	2135.18	Default State	50	2140.81	0.209578	4.52916	0.210825	6.9764	0.00744
ATG14L	336	354	CGENLSKQKFTRAVKKLNA			18	2135.18	Lipids	0	2136.28	0.022899	0	0	6.96689	0.005133
ATG14L	336	354	CGENLSKQKFTRAVKKLNA			18	2135.18	Lipids	0.005	2137.98	0.29611	1.69138	0.296994	6.96076	0.052521
ATG14L	336	354	CGENLSKQKFTRAVKKLNA			18	2135.18	Lipids	0.05	2138.75	0.203964	2.46555	0.205246	6.95727	0.01599
ATG14L	336	354	CGENLSKQKFTRAVKKLNA			18	2135.18	Lipids	0.5	2139.04	0.171249	2.75926	0.172773	6.95987	0.011556
ATG14L	336	354	CGENLSKQKFTRAVKKLNA			18	2135.18	Lipids	5	2140.34	0.21833	4.05447	0.219528	6.96844	0.005931
ATG14L	336	354	CGENLSKQKFTRAVKKLNA			18	2135.18	Lipids	50	2140.89	0.208144	4.60191	0.209399	6.98788	0.012814
ATG14L	341	354	SKQKFTRAVKKLNA			13	1618.98	Default State	0	1619.87	0.057434	0	0	5.20984	0.002621
ATG14L	341	354	SKQKFTRAVKKLNA			13	1618.98	Default State	0.005	1620.26	0.078128	0.389098	0.096968	5.20586	0.007355
ATG14L	341	354	SKQKFTRAVKKLNA			13	1618.98	Default State	0.05	1620.51	0.075919	0.636502	0.095196	5.20827	0.004816
ATG14L	341	354	SKQKFTRAVKKLNA			13	1618.98	Default State	0.5	1620.75	0.125661	0.879406	0.138165	5.21672	0.00747
ATG14L	341	354	SKQKFTRAVKKLNA			13	1618.98	Default State	5	1621.72	0.094437	1.8472	0.110531	5.22393	0.005018
ATG14L	341	354	SKQKFTRAVKKLNA			13	1618.98	Default State	50	1622.19	0.1233	2.31302	0.13602	5.23578	0.002051
ATG14L	341	354	SKQKFTRAVKKLNA			13	1618.98	Lipids	0	1619.87	0.057434	0	0	5.20984	0.002621
ATG14L	341	354	SKQKFTRAVKKLNA			13	1618.98	Lipids	0.005	1620.28	0.063554	0.407816	0.085661	5.21134	0.007066
ATG14L	341	354	SKQKFTRAVKKLNA			13	1618.98	Lipids	0.05	1620.48	0.070114	0.60898	0.090635	5.22183	0.003611
ATG14L	341	354	SKQKFTRAVKKLNA			13	1618.98	Lipids	0.5	1620.93	0.07267	1.05557	0.092626	5.22559	0.010806
ATG14L	341	354	SKQKFTRAVKKLNA			13	1618.98	Lipids	5	1621.78	0.086177	1.90701	0.103563	5.23483	0.006215
ATG14L	341	354	SKQKFTRAVKKLNA			13	1618.98	Lipids	50	1622.24	0.092303	2.36164	0.108713	5.25157	0.008107
ATG14L	361	367	FSQHVNL			6	844.431	Default State	0	844.738	0.035718	0	0	8.47507	0.000813
ATG14L	361	367	FSQHVNL			6	844.431	Default State	0.005	845.531	0.00723	0.79277	0.036443	8.44792	0.000745
ATG14L	361	367	FSQHVNL			6	844.431	Default State	0.05	845.933	0.033417	1.19522	0.048913	8.45661	0.002639
ATG14L	361	367	FSQHVNL			6	844.431	Default State	0.5	846.067	0.042516	1.32908	0.055529	8.45674	0.00111
ATG14L	361	367	FSQHVNL			6	844.431	Default State	5	846.346	0.011506	1.60831	0.037526	8.474	0.003207
ATG14L	361	367	FSQHVNL			6	844.431	Default State	50	846.772	0.023199	2.03385	0.042591	8.4948	0.001208
ATG14L	361	367	FSQHVNL			6	844.431	Lipids	0	844.738	0.035718	0	0	8.47507	0.000813
ATG14L	361	367	FSQHVNL			6	844.431	Lipids	0.005	845.475	0.004886	0.737379	0.036051	8.45181	0.001549
ATG14L	361	367	FSQHVNL			6	844.431	Lipids	0.05	845.941	0.031343	1.20281	0.047521	8.46843	0.002361
ATG14L	361	367	FSQHVNL			6	844.431	Lipids	0.5	846.033	0.008724	1.29547	0.036768	8.46476	0.005581
ATG14L	361	367	FSQHVNL			6	844.431	Lipids	5	846.363	0.039235	1.62563	0.053058	8.4854	0.008864
ATG14L	361	367	FSQHVNL			6	844.431	Lipids	50	846.689	0.006512	1.95157	0.036307	8.50046	0.001204
ATG14L	368	375	DQLQPLHT			6	951.489	Default State	0	951.846	1.13687e-13	0	0	7.84665	0
ATG14L	368	375	DQLQPLHT			6	951.489	Default State	0.005	952.947	0.046946	1.10117	0.046946	7.82122	0.013612
ATG14L	368	375	DQLQPLHT			6	951.489	Default State	0.05	953.472	0.048959	1.62638	0.048959	7.83501	0.001077
ATG14L	368	375	DQLQPLHT			6	951.489	Default State	0.5	953.972	0.044234	2.12603	0.044234	7.84309	4.30108e-05
ATG14L	368	375	DQLQPLHT			6	951.489	Default State	5	954.486	0.082911	2.64079	0.082911	7.84482	0.005034
ATG14L	368	375	DQLQPLHT			6	951.489	Default State	50	954.395	0.092928	2.5497	0.092928	7.856	0.001587
ATG14L	368	375	DQLQPLHT			6	951.489	Lipids	0	951.846	1.13687e-13	0	0	7.84665	0
ATG14L	368	375	DQLQPLHT			6	951.489	Lipids	0.005	952.925	0.047722	1.07945	0.047722	7.8424	0.005277
ATG14L	368	375	DQLQPLHT			6	951.489	Lipids	0.05	953.421	0.001954	1.57526	0.001954	7.8422	0.00016
ATG14L	368	375	DQLQPLHT			6	951.489	Lipids	0.5	954.018	0.045108	2.17233	0.045108	7.8423	0.003472
ATG14L	368	375	DQLQPLHT			6	951.489	Lipids	5	954.528	0.019036	2.6819	0.019036	7.84894	0.007777
ATG14L	368	375	DQLQPLHT			6	951.489	Lipids	50	954.579	0.01997	2.7336	0.01997	7.85496	0.002896
ATG14L	368	380	DQLQPLHTLRNLM			11	1578.84	Default State	0	1579.69	0	0	0	11.4064	0
ATG14L	368	380	DQLQPLHTLRNLM			11	1578.84	Default State	0.005	1580.69	0.03351	0.998212	0.03351	11.3813	0.003497
ATG14L	368	380	DQLQPLHTLRNLM			11	1578.84	Default State	0.05	1581.3	0.010302	1.6079	0.010302	11.3911	0.001084
ATG14L	368	380	DQLQPLHTLRNLM			11	1578.84	Default State	0.5	1581.92	0	2.22797	0	11.3959	0
ATG14L	368	380	DQLQPLHTLRNLM			11	1578.84	Default State	5	1583.02	0	3.33298	0	11.4004	0
ATG14L	368	380	DQLQPLHTLRNLM			11	1578.84	Default State	50	1583.62	0.023592	3.92765	0.023592	11.4246	0.001151
ATG14L	368	380	DQLQPLHTLRNLM			11	1578.84	Lipids	0	1579.69	0	0	0	11.4064	0
ATG14L	368	380	DQLQPLHTLRNLM			11	1578.84	Lipids	0.005	1580.74	0.08376	1.05208	0.08376	11.3888	0.006047
ATG14L	368	380	DQLQPLHTLRNLM			11	1578.84	Lipids	0.05	1581.37	0.011091	1.68266	0.011091	11.389	0.006772
ATG14L	368	380	DQLQPLHTLRNLM			11	1578.84	Lipids	0.5	1581.98	0.036471	2.29238	0.036471	11.39	0.006294
ATG14L	368	380	DQLQPLHTLRNLM			11	1578.84	Lipids	5	1583.09	0.003612	3.39881	0.003612	11.4124	0.006687
ATG14L	368	380	DQLQPLHTLRNLM			11	1578.84	Lipids	50	1583.68	0.011585	3.99008	0.011585	11.4251	0.003792
ATG14L	368	381	DQLQPLHTLRNLMY			12	1741.91	Default State	0	1742.94	0.091721	0	0	11.7739	0.002418
ATG14L	368	381	DQLQPLHTLRNLMY			12	1741.91	Default State	0.005	1744.01	0.047485	1.07314	0.103284	11.7448	0.010197
ATG14L	368	381	DQLQPLHTLRNLMY			12	1741.91	Default State	0.05	1744.57	0.041918	1.62977	0.100846	11.75	0.00464
ATG14L	368	381	DQLQPLHTLRNLMY			12	1741.91	Default State	0.5	1745.23	0.042607	2.28763	0.101134	11.7507	0.007012
ATG14L	368	381	DQLQPLHTLRNLMY			12	1741.91	Default State	5	1746.18	0.072467	3.24526	0.116894	11.7718	0.015226
ATG14L	368	381	DQLQPLHTLRNLMY			12	1741.91	Default State	50	1746.86	0.072215	3.92155	0.116738	11.7958	0.010582
ATG14L	368	381	DQLQPLHTLRNLMY			12	1741.91	Lipids	0	1742.94	0.091721	0	0	11.7739	0.002418
ATG14L	368	381	DQLQPLHTLRNLMY			12	1741.91	Lipids	0.005	1743.96	0.098175	1.02463	0.134354	11.7469	0.004113
ATG14L	368	381	DQLQPLHTLRNLMY			12	1741.91	Lipids	0.05	1744.62	0.046103	1.68046	0.102656	11.7491	0.005587
ATG14L	368	381	DQLQPLHTLRNLMY			12	1741.91	Lipids	0.5	1745.21	0.077128	2.27138	0.11984	11.7558	0.007567
ATG14L	368	381	DQLQPLHTLRNLMY			12	1741.91	Lipids	5	1746.32	0.062004	3.38108	0.110713	11.7629	0.003537
ATG14L	368	381	DQLQPLHTLRNLMY			12	1741.91	Lipids	50	1746.89	0.012606	3.94956	0.092583	11.7899	0.002552
ATG14L	370	380	LQPLHTLRNLM			9	1335.76	Default State	0	1336.61	0	0	0	11.4238	0
ATG14L	370	380	LQPLHTLRNLM			9	1335.76	Default State	0.005	1337.34	0.052694	0.728436	0.052694	11.3941	0.005721
ATG14L	370	380	LQPLHTLRNLM			9	1335.76	Default State	0.05	1337.92	0.052996	1.31037	0.052996	11.3938	0.000141
ATG14L	370	380	LQPLHTLRNLM			9	1335.76	Default State	0.5	1338.27	0.016614	1.66058	0.016614	11.3994	0.006368
ATG14L	370	380	LQPLHTLRNLM			9	1335.76	Default State	5	1339.25	0.011405	2.64404	0.011405	11.4174	0.006963
ATG14L	370	380	LQPLHTLRNLM			9	1335.76	Default State	50	1339.86	0.048979	3.25395	0.048979	11.4325	0.00441
ATG14L	370	380	LQPLHTLRNLM			9	1335.76	Lipids	0	1336.61	0	0	0	11.4238	0
ATG14L	370	380	LQPLHTLRNLM			9	1335.76	Lipids	0.005	1337.46	0.053085	0.851477	0.053085	11.3946	0.003298
ATG14L	370	380	LQPLHTLRNLM			9	1335.76	Lipids	0.05	1337.95	0.014695	1.34492	0.014695	11.3965	0.00887
ATG14L	370	380	LQPLHTLRNLM			9	1335.76	Lipids	0.5	1338.39	0.069676	1.78069	0.069676	11.3936	0.009853
ATG14L	370	380	LQPLHTLRNLM			9	1335.76	Lipids	5	1339.33	0.062052	2.72124	0.062052	11.4131	0.009642
ATG14L	370	380	LQPLHTLRNLM			9	1335.76	Lipids	50	1340	0.08763	3.38736	0.08763	11.4377	0.008714
ATG14L	371	380	QPLHTLRNLM			8	1222.67	Default State	0	1223.29	0	0	0	11.4243	0
ATG14L	371	380	QPLHTLRNLM			8	1222.67	Default State	0.005	1224.25	0.075458	0.955464	0.075458	11.3959	0.003336
ATG14L	371	380	QPLHTLRNLM			8	1222.67	Default State	0.05	1224.61	0.048965	1.31662	0.048965	11.3948	0.003837
ATG14L	371	380	QPLHTLRNLM			8	1222.67	Default State	0.5	1225.05	0.040619	1.75992	0.040619	11.3992	0.002829
ATG14L	371	380	QPLHTLRNLM			8	1222.67	Default State	5	1226	0.08868	2.70299	0.08868	11.4165	0.006375
ATG14L	371	380	QPLHTLRNLM			8	1222.67	Default State	50	1226.5	0	3.20204	0	11.4395	0
ATG14L	371	380	QPLHTLRNLM			8	1222.67	Lipids	0	1223.29	0	0	0	11.4243	0
ATG14L	371	380	QPLHTLRNLM			8	1222.67	Lipids	0.005	1224.18	0.012487	0.885342	0.012487	11.3996	0.00519
ATG14L	371	380	QPLHTLRNLM			8	1222.67	Lipids	0.05	1224.66	0.044542	1.36546	0.044542	11.3975	0.007128
ATG14L	371	380	QPLHTLRNLM			8	1222.67	Lipids	0.5	1225.11	0.034516	1.82136	0.034516	11.3979	0.007117
ATG14L	371	380	QPLHTLRNLM			8	1222.67	Lipids	5	1225.99	0.038867	2.70027	0.038867	11.4155	0.006977
ATG14L	371	380	QPLHTLRNLM			8	1222.67	Lipids	50	1226.58	0.019907	3.29096	0.019907	11.4411	0.010088
ATG14L	381	388	YLVSPSSE			6	881.425	Default State	0	881.873	0	0	0	8.30204	0
ATG14L	381	388	YLVSPSSE			6	881.425	Default State	0.005	883.031	0.06518	1.15837	0.06518	8.27737	0.00867
ATG14L	381	388	YLVSPSSE			6	881.425	Default State	0.05	883.263	0.017433	1.39033	0.017433	8.28337	0.000776
ATG14L	381	388	YLVSPSSE			6	881.425	Default State	0.5	883.334	0.044072	1.46094	0.044072	8.29153	0.003126
ATG14L	381	388	YLVSPSSE			6	881.425	Default State	5	883.407	0.010826	1.53429	0.010826	8.2985	0.004652
ATG14L	381	388	YLVSPSSE			6	881.425	Default State	50	883.504	0.030133	1.63084	0.030133	8.30681	0.001737
ATG14L	381	388	YLVSPSSE			6	881.425	Lipids	0	881.873	0	0	0	8.30204	0
ATG14L	381	388	YLVSPSSE			6	881.425	Lipids	0.005	883.077	0.035164	1.20458	0.035164	8.29424	0.005148
ATG14L	381	388	YLVSPSSE			6	881.425	Lipids	0.05	883.333	0.002805	1.46045	0.002805	8.29844	0.00193
ATG14L	381	388	YLVSPSSE			6	881.425	Lipids	0.5	883.367	0.028465	1.49394	0.028465	8.29683	0.006728
ATG14L	381	388	YLVSPSSE			6	881.425	Lipids	5	883.435	0.022075	1.562	0.022075	8.30293	0.004752
ATG14L	381	388	YLVSPSSE			6	881.425	Lipids	50	883.544	0.008169	1.67085	0.008169	8.31209	0.001385
ATG14L	389	400	HLGRSGPFEVRA			10	1325.71	Default State	0	1326.33	0	0	0	7.78104	0
ATG14L	389	400	HLGRSGPFEVRA			10	1325.71	Default State	0.005	1328.17	0.03904	1.83922	0.03904	7.74958	0.003597
ATG14L	389	400	HLGRSGPFEVRA			10	1325.71	Default State	0.05	1329.29	0.013738	2.95464	0.013738	7.75363	0.002346
ATG14L	389	400	HLGRSGPFEVRA			10	1325.71	Default State	0.5	1329.97	0.068868	3.6378	0.068868	7.76488	0.008651
ATG14L	389	400	HLGRSGPFEVRA			10	1325.71	Default State	5	1330.34	0.024544	4.00627	0.024544	7.7937	0.007034
ATG14L	389	400	HLGRSGPFEVRA			10	1325.71	Default State	50	1330.36	0.00091	4.03202	0.00091	7.82265	0.006226
ATG14L	389	400	HLGRSGPFEVRA			10	1325.71	Lipids	0	1326.33	0	0	0	7.78104	0
ATG14L	389	400	HLGRSGPFEVRA			10	1325.71	Lipids	0.005	1328.18	0.151163	1.84524	0.151163	7.7676	0.007916
ATG14L	389	400	HLGRSGPFEVRA			10	1325.71	Lipids	0.05	1329.26	0.080957	2.92819	0.080957	7.77623	0.004249
ATG14L	389	400	HLGRSGPFEVRA			10	1325.71	Lipids	0.5	1329.98	0.02913	3.64744	0.02913	7.78211	0.008246
ATG14L	389	400	HLGRSGPFEVRA			10	1325.71	Lipids	5	1330.36	0.032768	4.02419	0.032768	7.8105	0.011196
ATG14L	389	400	HLGRSGPFEVRA			10	1325.71	Lipids	50	1330.37	0.057795	4.03569	0.057795	7.84444	0.009766
ATG14L	406	421	MEFVDPGVAGESDESG			14	1625.66	Default State	0	1626.62	0	0	0	10.6539	0
ATG14L	406	421	MEFVDPGVAGESDESG			14	1625.66	Default State	0.005	1628.17	0.117604	1.55153	0.117604	10.6268	0.009223
ATG14L	406	421	MEFVDPGVAGESDESG			14	1625.66	Default State	0.05	1628.55	0.050972	1.93356	0.050972	10.6292	0.003994
ATG14L	406	421	MEFVDPGVAGESDESG			14	1625.66	Default State	0.5	1628.6	0.123291	1.98623	0.123291	10.6345	0.005261
ATG14L	406	421	MEFVDPGVAGESDESG			14	1625.66	Default State	5	1629.38	0.166202	2.76479	0.166202	10.6531	0.007053
ATG14L	406	421	MEFVDPGVAGESDESG			14	1625.66	Default State	50	1630.26	0.081873	3.64752	0.081873	10.6665	0.002688
ATG14L	406	421	MEFVDPGVAGESDESG			14	1625.66	Lipids	0	1626.62	0	0	0	10.6539	0
ATG14L	406	421	MEFVDPGVAGESDESG			14	1625.66	Lipids	0.005	1628.22	0.112031	1.60534	0.112031	10.6334	0.005662
ATG14L	406	421	MEFVDPGVAGESDESG			14	1625.66	Lipids	0.05	1628.52	0.04508	1.89921	0.04508	10.6348	0.002183
ATG14L	406	421	MEFVDPGVAGESDESG			14	1625.66	Lipids	0.5	1628.8	0.006163	2.18474	0.006163	10.6444	0.010202
ATG14L	406	421	MEFVDPGVAGESDESG			14	1625.66	Lipids	5	1629.58	0.063962	2.96802	0.063962	10.6571	0.006704
ATG14L	406	421	MEFVDPGVAGESDESG			14	1625.66	Lipids	50	1630.35	0.04559	3.73043	0.04559	10.6662	0.004048
ATG14L	428	444	EETDLGTDWENLPSPRF			14	2005.91	Default State	0	2007	2.27374e-13	0	0	12.2255	0
ATG14L	428	444	EETDLGTDWENLPSPRF			14	2005.91	Default State	0.005	2012.54	0.086129	5.54006	0.086129	12.2072	0.003979
ATG14L	428	444	EETDLGTDWENLPSPRF			14	2005.91	Default State	0.05	2012.92	0.211188	5.9195	0.211188	12.2137	0.010008
ATG14L	428	444	EETDLGTDWENLPSPRF			14	2005.91	Default State	0.5	2012.86	0.080943	5.86334	0.080943	12.2123	0.002362
ATG14L	428	444	EETDLGTDWENLPSPRF			14	2005.91	Default State	5	2013.07	0.030315	6.06937	0.030315	12.2383	0.009362
ATG14L	428	444	EETDLGTDWENLPSPRF			14	2005.91	Default State	50	2013.22	0.055517	6.21864	0.055517	12.2444	0.004554
ATG14L	428	444	EETDLGTDWENLPSPRF			14	2005.91	Lipids	0	2007	2.27374e-13	0	0	12.2255	0
ATG14L	428	444	EETDLGTDWENLPSPRF			14	2005.91	Lipids	0.005	2012.78	0	5.78503	2.27374e-13	12.2056	0
ATG14L	428	444	EETDLGTDWENLPSPRF			14	2005.91	Lipids	0.05	2013.02	0.027288	6.02071	0.027288	12.2008	0.001905
ATG14L	428	444	EETDLGTDWENLPSPRF			14	2005.91	Lipids	0.5	2013.11	0.015626	6.1129	0.015626	12.2106	3.30059e-05
ATG14L	428	444	EETDLGTDWENLPSPRF			14	2005.91	Lipids	5	2013.13	0.149125	6.13366	0.149125	12.2273	0.009735
ATG14L	428	444	EETDLGTDWENLPSPRF			14	2005.91	Lipids	50	2013.26	0.049387	6.26343	0.049387	12.2484	0.003413
ATG14L	430	444	TDLGTDWENLPSPRF			12	1747.83	Default State	0	1749.01	0.030401	0	0	12.5818	0.000842
ATG14L	430	444	TDLGTDWENLPSPRF			12	1747.83	Default State	0.005	1749.02	0.119615	0.00982	0.123418	12.5601	0.004487
ATG14L	430	444	TDLGTDWENLPSPRF			12	1747.83	Default State	0.05	1749.18	0.079177	0.163042	0.084812	12.5691	0.007925
ATG14L	430	444	TDLGTDWENLPSPRF			12	1747.83	Default State	0.5	1749.45	0.000249	0.434468	0.030402	12.5798	0.003095
ATG14L	430	444	TDLGTDWENLPSPRF			12	1747.83	Default State	5	1750.3	0.018965	1.28609	0.035831	12.5858	0.000231
ATG14L	430	444	TDLGTDWENLPSPRF			12	1747.83	Default State	50	1751.49	0.157013	2.4779	0.159929	12.6155	0.002386
ATG14L	430	444	TDLGTDWENLPSPRF			12	1747.83	Lipids	0	1749.01	0.030401	0	0	12.5818	0.000842
ATG14L	430	444	TDLGTDWENLPSPRF			12	1747.83	Lipids	0.005	1749.13	0.033843	0.11359	0.045492	12.5631	0.007119
ATG14L	430	444	TDLGTDWENLPSPRF			12	1747.83	Lipids	0.05	1749.24	0.033354	0.222549	0.045129	12.5722	0.009255
ATG14L	430	444	TDLGTDWENLPSPRF			12	1747.83	Lipids	0.5	1749.43	0.038191	0.415004	0.048813	12.5701	0.000845
ATG14L	430	444	TDLGTDWENLPSPRF			12	1747.83	Lipids	5	1750.26	0.135892	1.24418	0.139251	12.5929	0.009412
ATG14L	430	444	TDLGTDWENLPSPRF			12	1747.83	Lipids	50	1751.63	0.043871	2.61089	0.053375	12.6198	0.00898
ATG14L	433	444	GTDWENLPSPRF			9	1418.67	Default State	0	1419.45	0	0	0	11.5108	0
ATG14L	433	444	GTDWENLPSPRF			9	1418.67	Default State	0.005	1423.02	0	3.56297	0	11.489	0
ATG14L	433	444	GTDWENLPSPRF			9	1418.67	Default State	0.05	1423.34	0	3.88176	0	11.4925	0
ATG14L	433	444	GTDWENLPSPRF			9	1418.67	Default State	0.5	1423.35	0.011498	3.89779	0.011498	11.5017	0.000194
ATG14L	433	444	GTDWENLPSPRF			9	1418.67	Default State	5	1423.43	0.019815	3.97497	0.019815	11.5273	0.010655
ATG14L	433	444	GTDWENLPSPRF			9	1418.67	Default State	50	1423.58	2.27374e-13	4.12431	2.27374e-13	11.5462	0
ATG14L	433	444	GTDWENLPSPRF			9	1418.67	Lipids	0	1419.45	0	0	0	11.5108	0
ATG14L	433	444	GTDWENLPSPRF			9	1418.67	Lipids	0.005	1422.96	0	3.50172	0	11.4926	0
ATG14L	433	444	GTDWENLPSPRF			9	1418.67	Lipids	0.05	1423.36	0.045864	3.90503	0.045864	11.4939	0.00737
ATG14L	433	444	GTDWENLPSPRF			9	1418.67	Lipids	0.5	1423.41	0.020352	3.95851	0.020352	11.5011	0.006741
ATG14L	433	444	GTDWENLPSPRF			9	1418.67	Lipids	5	1423.46	0.053878	4.00991	0.053878	11.5194	0.005838
ATG14L	433	444	GTDWENLPSPRF			9	1418.67	Lipids	50	1423.52	0.038487	4.06602	0.038487	11.5427	0.003938
ATG14L	445	451	CDIPSQS			5	749.313	Default State	0	749.972	0	0	0	6.57532	0
ATG14L	445	451	CDIPSQS			5	749.313	Default State	0.005	751.826	0.058828	1.85409	0.058828	6.55845	0.002985
ATG14L	445	451	CDIPSQS			5	749.313	Default State	0.05	751.997	0.048384	2.02515	0.048384	6.56059	0.002162
ATG14L	445	451	CDIPSQS			5	749.313	Default State	0.5	752.101	0.030091	2.12943	0.030091	6.56045	0.00333
ATG14L	445	451	CDIPSQS			5	749.313	Default State	5	752.068	0.032381	2.09592	0.032381	6.56677	0.003235
ATG14L	445	451	CDIPSQS			5	749.313	Default State	50	752.096	0.020129	2.12466	0.020129	6.5724	0.001961
ATG14L	445	451	CDIPSQS			5	749.313	Lipids	0	749.972	0	0	0	6.57532	0
ATG14L	445	451	CDIPSQS			5	749.313	Lipids	0.005	751.875	0.083118	1.90344	0.083118	6.56682	0.003209
ATG14L	445	451	CDIPSQS			5	749.313	Lipids	0.05	752.092	0.032563	2.12029	0.032563	6.5701	0.002273
ATG14L	445	451	CDIPSQS			5	749.313	Lipids	0.5	752.027	0.046981	2.05573	0.046981	6.56487	0.003243
ATG14L	445	451	CDIPSQS			5	749.313	Lipids	5	752.155	0.028223	2.18378	0.028223	6.56749	0.001933
ATG14L	445	451	CDIPSQS			5	749.313	Lipids	50	752.068	0.099845	2.09596	0.099845	6.57292	0.001182
ATG14L	445	453	CDIPSQSVE			7	977.424	Default State	0	977.94	0	0	0	7.63727	0
ATG14L	445	453	CDIPSQSVE			7	977.424	Default State	0.005	981.033	0.030558	3.09315	0.030558	7.61186	0.005992
ATG14L	445	453	CDIPSQSVE			7	977.424	Default State	0.05	981.293	0.024165	3.35254	0.024165	7.61557	0.000522
ATG14L	445	453	CDIPSQSVE			7	977.424	Default State	0.5	981.279	0.043279	3.33847	0.043279	7.6215	0.001156
ATG14L	445	453	CDIPSQSVE			7	977.424	Default State	5	981.3	0.030495	3.36013	0.030495	7.62552	0.005519
ATG14L	445	453	CDIPSQSVE			7	977.424	Default State	50	981.324	0.042007	3.38423	0.042007	7.62985	0.00456
ATG14L	445	453	CDIPSQSVE			7	977.424	Lipids	0	977.94	0	0	0	7.63727	0
ATG14L	445	453	CDIPSQSVE			7	977.424	Lipids	0.005	981.043	0.047943	3.10278	0.047943	7.62408	0.004219
ATG14L	445	453	CDIPSQSVE			7	977.424	Lipids	0.05	981.306	0.006199	3.36615	0.006199	7.62635	0.002426
ATG14L	445	453	CDIPSQSVE			7	977.424	Lipids	0.5	981.3	0.024777	3.35999	0.024777	7.62233	0.003094
ATG14L	445	453	CDIPSQSVE			7	977.424	Lipids	5	981.341	0.022552	3.40056	0.022552	7.62696	0.00166
ATG14L	445	453	CDIPSQSVE			7	977.424	Lipids	50	981.348	0.023031	3.40779	0.023031	7.63392	0.002768
ATG14L	447	458	IPSQSVEVSQSQ			10	1288.64	Default State	0	1289.34	0.012274	0	0	10.1555	9.57984e-05
ATG14L	447	458	IPSQSVEVSQSQ			10	1288.64	Default State	0.005	1289.8	0.200975	0.458239	0.20135	10.1217	0.000726
ATG14L	447	458	IPSQSVEVSQSQ			10	1288.64	Default State	0.05	1291.09	0.079999	1.75047	0.080935	10.1386	0.002749
ATG14L	447	458	IPSQSVEVSQSQ			10	1288.64	Default State	0.5	1292.57	0.177191	3.22705	0.177616	10.1452	0.007475
ATG14L	447	458	IPSQSVEVSQSQ			10	1288.64	Default State	5	1293.5	0.18515	4.1581	0.185556	10.1598	0.005618
ATG14L	447	458	IPSQSVEVSQSQ			10	1288.64	Default State	50	1293.95	0.025146	4.61028	0.027981	10.1776	0.004155
ATG14L	447	458	IPSQSVEVSQSQ			10	1288.64	Lipids	0	1289.34	0.012274	0	0	10.1555	9.57984e-05
ATG14L	447	458	IPSQSVEVSQSQ			10	1288.64	Lipids	0.005	1289.88	0.082762	0.543221	0.083667	10.1483	0.004227
ATG14L	447	458	IPSQSVEVSQSQ			10	1288.64	Lipids	0.05	1291.01	0.129093	1.66769	0.129675	10.1483	0.006257
ATG14L	447	458	IPSQSVEVSQSQ			10	1288.64	Lipids	0.5	1292.5	0.097306	3.15618	0.098077	10.147	0.008906
ATG14L	447	458	IPSQSVEVSQSQ			10	1288.64	Lipids	5	1293.69	0.103346	4.34474	0.104072	10.1791	0.006323
ATG14L	447	458	IPSQSVEVSQSQ			10	1288.64	Lipids	50	1294.01	0.297337	4.67115	0.297591	10.207	0.00147
ATG14L	461	476	QASPPIASSSAGGMIS			13	1460.7	Default State	0	1461.65	0.090264	0	0	10.8593	0.003737
ATG14L	461	476	QASPPIASSSAGGMIS			13	1460.7	Default State	0.005	1462.18	0.076158	0.525116	0.1181	10.8198	0.018303
ATG14L	461	476	QASPPIASSSAGGMIS			13	1460.7	Default State	0.05	1462.62	0.066116	0.96955	0.111888	10.8328	0.005064
ATG14L	461	476	QASPPIASSSAGGMIS			13	1460.7	Default State	0.5	1463.05	0.181036	1.39454	0.202291	10.8447	0.010904
ATG14L	461	476	QASPPIASSSAGGMIS			13	1460.7	Default State	5	1463.62	0.05345	1.96786	0.104903	10.8826	0.010288
ATG14L	461	476	QASPPIASSSAGGMIS			13	1460.7	Default State	50	1463.84	0.128088	2.18699	0.156698	10.9097	0.004476
ATG14L	461	476	QASPPIASSSAGGMIS			13	1460.7	Lipids	0	1461.65	0.090264	0	0	10.8593	0.003737
ATG14L	461	476	QASPPIASSSAGGMIS			13	1460.7	Lipids	0.005	1462.24	0.081956	0.583853	0.12192	10.8368	0.008724
ATG14L	461	476	QASPPIASSSAGGMIS			13	1460.7	Lipids	0.05	1462.58	0.072633	0.922935	0.115859	10.8372	0.006496
ATG14L	461	476	QASPPIASSSAGGMIS			13	1460.7	Lipids	0.5	1463.08	0.063376	1.4268	0.110291	10.8535	0.010523
ATG14L	461	476	QASPPIASSSAGGMIS			13	1460.7	Lipids	5	1463.62	0.057439	1.96402	0.10699	10.8829	0.009146
ATG14L	461	476	QASPPIASSSAGGMIS			13	1460.7	Lipids	50	1463.7	0.047382	2.05069	0.101945	10.9187	0.000954
ATG14L	479	486	AASVTSWF			7	868.42	Default State	0	868.831	0	0	0	13.0655	0
ATG14L	479	486	AASVTSWF			7	868.42	Default State	0.005	871.656	0.067837	2.82499	0.067837	13.0681	0.001229
ATG14L	479	486	AASVTSWF			7	868.42	Default State	0.05	871.867	0.021997	3.03529	0.021997	13.0721	0.004007
ATG14L	479	486	AASVTSWF			7	868.42	Default State	0.5	872.01	0.096956	3.17887	0.096956	13.0718	0.002484
ATG14L	479	486	AASVTSWF			7	868.42	Default State	5	872.131	0.038994	3.30024	0.038994	13.0828	0.008398
ATG14L	479	486	AASVTSWF			7	868.42	Default State	50	872.238	0.008015	3.40716	0.008015	13.0864	0.004163
ATG14L	479	486	AASVTSWF			7	868.42	Lipids	0	868.831	0	0	0	13.0655	0
ATG14L	479	486	AASVTSWF			7	868.42	Lipids	0.005	869.949	0.027116	1.11796	0.027116	13.0639	0.006686
ATG14L	479	486	AASVTSWF			7	868.42	Lipids	0.05	871.505	0.036194	2.67359	0.036194	13.0719	0.005986
ATG14L	479	486	AASVTSWF			7	868.42	Lipids	0.5	871.91	0.065598	3.07843	0.065598	13.0694	0.001217
ATG14L	479	486	AASVTSWF			7	868.42	Lipids	5	872.165	0.018937	3.3337	0.018937	13.0733	0.009628
ATG14L	479	486	AASVTSWF			7	868.42	Lipids	50	872.241	0.057295	3.41011	0.057295	13.0867	0.005569
ATG14L	486	493	FKAYTGHR			7	979.511	Default State	0	979.931	0.010493	0	0	5.43372	0.002195
ATG14L	486	493	FKAYTGHR			7	979.511	Default State	0.005	982.17	0.157481	2.23916	0.15783	5.42308	0.003568
ATG14L	486	493	FKAYTGHR			7	979.511	Default State	0.05	982.216	0.038224	2.28456	0.039638	5.42669	0.002076
ATG14L	486	493	FKAYTGHR			7	979.511	Default State	0.5	982.226	0.066702	2.29536	0.067522	5.43599	0.005451
ATG14L	486	493	FKAYTGHR			7	979.511	Default State	5	982.391	0.030626	2.45979	0.032374	5.44223	0.003917
ATG14L	486	493	FKAYTGHR			7	979.511	Default State	50	982.38	0.048847	2.44926	0.049961	5.45408	0.002694
ATG14L	486	493	FKAYTGHR			7	979.511	Lipids	0	979.931	0.010493	0	0	5.43372	0.002195
ATG14L	486	493	FKAYTGHR			7	979.511	Lipids	0.005	981.412	0.149278	1.48129	0.149646	5.43392	0.00248
ATG14L	486	493	FKAYTGHR			7	979.511	Lipids	0.05	982.203	0.067547	2.27176	0.068358	5.43917	0.00269
ATG14L	486	493	FKAYTGHR			7	979.511	Lipids	0.5	982.349	0.114651	2.41782	0.11513	5.43961	0.005966
ATG14L	486	493	FKAYTGHR			7	979.511	Lipids	5	982.299	0.070959	2.36789	0.07173	5.45338	0.003852
ATG14L	486	493	FKAYTGHR			7	979.511	Lipids	50	982.388	0.053913	2.45736	0.054925	5.46441	0.003231
ATG14L	487	493	KAYTGHR			6	832.442	Default State	0	832.878	0	0	0	5.43837	0
ATG14L	487	493	KAYTGHR			6	832.442	Default State	0.005	834.757	0.022849	1.87917	0.022849	5.4234	0.003649
ATG14L	487	493	KAYTGHR			6	832.442	Default State	0.05	834.783	0.018496	1.90562	0.018496	5.42401	0.002908
ATG14L	487	493	KAYTGHR			6	832.442	Default State	0.5	834.82	0.070834	1.9422	0.070834	5.43301	0.00458
ATG14L	487	493	KAYTGHR			6	832.442	Default State	5	834.866	0.027235	1.98868	0.027235	5.43832	0.004803
ATG14L	487	493	KAYTGHR			6	832.442	Default State	50	834.859	0.085351	1.98159	0.085351	5.45423	0.001244
ATG14L	487	493	KAYTGHR			6	832.442	Lipids	0	832.878	0	0	0	5.43837	0
ATG14L	487	493	KAYTGHR			6	832.442	Lipids	0.005	834.154	0.008564	1.27629	0.008564	5.43031	0.004482
ATG14L	487	493	KAYTGHR			6	832.442	Lipids	0.05	834.725	0.066682	1.84691	0.066682	5.4349	0.001921
ATG14L	487	493	KAYTGHR			6	832.442	Lipids	0.5	834.876	0.015034	1.99819	0.015034	5.43928	0.006564
ATG14L	487	493	KAYTGHR			6	832.442	Lipids	5	834.888	0.049179	2.01001	0.049179	5.45081	0.00444
ATG14L	487	493	KAYTGHR			6	832.442	Lipids	50	834.918	0.03561	2.03988	0.03561	5.46547	0.000888
Beclin 1	17	27	VCQRCSQPLKL			9	1274.67	Default State	0	1275.36	0.029025	0	0	8.32639	0.002957
Beclin 1	17	27	VCQRCSQPLKL			9	1274.67	Default State	0.005	1276.75	0.096014	1.391	0.100306	8.27242	0.022167
Beclin 1	17	27	VCQRCSQPLKL			9	1274.67	Default State	0.05	1276.94	0.04925	1.5842	0.057167	8.29293	0.00594
Beclin 1	17	27	VCQRCSQPLKL			9	1274.67	Default State	0.5	1277.31	0.061272	1.95245	0.067799	8.29669	0.010755
Beclin 1	17	27	VCQRCSQPLKL			9	1274.67	Default State	5	1278.41	0.057441	3.05158	0.064358	8.31584	0.011651
Beclin 1	17	27	VCQRCSQPLKL			9	1274.67	Default State	50	1278.84	0.026542	3.48356	0.039331	8.33992	0.00369
Beclin 1	17	27	VCQRCSQPLKL			9	1274.67	Lipids	0	1275.36	0.029025	0	0	8.32639	0.002957
Beclin 1	17	27	VCQRCSQPLKL			9	1274.67	Lipids	0.005	1276.85	0.058894	1.48979	0.065658	8.29739	0.008325
Beclin 1	17	27	VCQRCSQPLKL			9	1274.67	Lipids	0.05	1277.02	0.055086	1.66055	0.062265	8.3086	0.002264
Beclin 1	17	27	VCQRCSQPLKL			9	1274.67	Lipids	0.5	1277.4	0.071573	2.04407	0.077234	8.31552	0.011439
Beclin 1	17	27	VCQRCSQPLKL			9	1274.67	Lipids	5	1278.48	0.071647	3.11689	0.077303	8.33041	0.009352
Beclin 1	17	27	VCQRCSQPLKL			9	1274.67	Lipids	50	1278.94	0.030641	3.5774	0.042206	8.35454	0.00462
Beclin 1	17	31	VCQRCSQPLKLDTSF			13	1724.85	Default State	0	1725.82	0.038734	0	0	9.84804	0.001467
Beclin 1	17	31	VCQRCSQPLKLDTSF			13	1724.85	Default State	0.005	1728.83	0.098324	3.01049	0.105678	9.81133	0.016274
Beclin 1	17	31	VCQRCSQPLKLDTSF			13	1724.85	Default State	0.05	1728.99	0.084709	3.16665	0.093145	9.81871	0.004226
Beclin 1	17	31	VCQRCSQPLKLDTSF			13	1724.85	Default State	0.5	1729.33	0.098393	3.5063	0.105743	9.82559	0.008659
Beclin 1	17	31	VCQRCSQPLKLDTSF			13	1724.85	Default State	5	1730.5	0.153027	4.67884	0.157853	9.84894	0.011202
Beclin 1	17	31	VCQRCSQPLKLDTSF			13	1724.85	Default State	50	1731.04	0.169942	5.21869	0.174301	9.87057	0.00698
Beclin 1	17	31	VCQRCSQPLKLDTSF			13	1724.85	Lipids	0	1725.82	0.038734	0	0	9.84804	0.001467
Beclin 1	17	31	VCQRCSQPLKLDTSF			13	1724.85	Lipids	0.005	1728.98	0.00158	3.15225	0.038766	9.82612	0.003181
Beclin 1	17	31	VCQRCSQPLKLDTSF			13	1724.85	Lipids	0.05	1729.18	0.105074	3.35205	0.111986	9.82311	0.005567
Beclin 1	17	31	VCQRCSQPLKLDTSF			13	1724.85	Lipids	0.5	1729.41	0.040243	3.58478	0.055855	9.83848	0.006862
Beclin 1	17	31	VCQRCSQPLKLDTSF			13	1724.85	Lipids	5	1730.36	0.080249	4.53508	0.089107	9.8583	0.009932
Beclin 1	17	31	VCQRCSQPLKLDTSF			13	1724.85	Lipids	50	1730.99	0.076853	5.16132	0.086062	9.87446	0.004347
Beclin 1	32	41	KILDRVTIQE			9	1214.71	Default State	0	1215.33	0.119196	0	0	8.0683	0.002135
Beclin 1	32	41	KILDRVTIQE			9	1214.71	Default State	0.005	1219.49	0.080114	4.15707	0.143618	8.02663	0.016724
Beclin 1	32	41	KILDRVTIQE			9	1214.71	Default State	0.05	1219.57	0.044801	4.24235	0.127337	8.03685	0.00216
Beclin 1	32	41	KILDRVTIQE			9	1214.71	Default State	0.5	1219.61	0.037049	4.27728	0.124821	8.04566	0.006435
Beclin 1	32	41	KILDRVTIQE			9	1214.71	Default State	5	1219.66	0.122254	4.32937	0.170744	8.06031	0.009904
Beclin 1	32	41	KILDRVTIQE			9	1214.71	Default State	50	1219.7	0.065669	4.36945	0.136089	8.07697	0.003574
Beclin 1	32	41	KILDRVTIQE			9	1214.71	Lipids	0	1215.33	0.119196	0	0	8.0683	0.002135
Beclin 1	32	41	KILDRVTIQE			9	1214.71	Lipids	0.005	1219.56	0.051888	4.22864	0.13	8.04601	0.008262
Beclin 1	32	41	KILDRVTIQE			9	1214.71	Lipids	0.05	1219.56	0.165958	4.23127	0.204327	8.04964	0.004137
Beclin 1	32	41	KILDRVTIQE			9	1214.71	Lipids	0.5	1219.6	0.029815	4.26992	0.122868	8.05348	0.008623
Beclin 1	32	41	KILDRVTIQE			9	1214.71	Lipids	5	1219.66	0.034736	4.32779	0.124154	8.07168	0.00866
Beclin 1	32	41	KILDRVTIQE			9	1214.71	Lipids	50	1219.66	0.057675	4.33296	0.132416	8.0893	0.003205
Beclin 1	35	41	DRVTIQE			6	860.447	Default State	0	860.783	0	0	0	6.78979	0
Beclin 1	35	41	DRVTIQE			6	860.447	Default State	0.005	863.68	0.058235	2.89681	0.058235	6.75781	0.007307
Beclin 1	35	41	DRVTIQE			6	860.447	Default State	0.05	863.672	0.073473	2.88837	0.073473	6.76767	0.005547
Beclin 1	35	41	DRVTIQE			6	860.447	Default State	0.5	863.662	0.028922	2.87868	0.028922	6.77402	0.002713
Beclin 1	35	41	DRVTIQE			6	860.447	Default State	5	863.687	0.041024	2.9031	0.041024	6.78397	0.002728
Beclin 1	35	41	DRVTIQE			6	860.447	Default State	50	863.543	0.030911	2.75997	0.030911	6.79156	0.002934
Beclin 1	35	41	DRVTIQE			6	860.447	Lipids	0	860.783	0	0	0	6.78979	0
Beclin 1	35	41	DRVTIQE			6	860.447	Lipids	0.005	863.725	0.019209	2.94134	0.019209	6.77731	0.007803
Beclin 1	35	41	DRVTIQE			6	860.447	Lipids	0.05	863.658	0.052572	2.87444	0.052572	6.7824	0.002864
Beclin 1	35	41	DRVTIQE			6	860.447	Lipids	0.5	863.625	0.058053	2.84182	0.058053	6.77931	0.003691
Beclin 1	35	41	DRVTIQE			6	860.447	Lipids	5	863.646	0.021936	2.86238	0.021936	6.79173	0.003583
Beclin 1	35	41	DRVTIQE			6	860.447	Lipids	50	863.539	0.037918	2.7553	0.037918	6.79526	0.00189
Beclin 1	42	48	LTAPLLT			5	728.455	Default State	0	728.872	0	0	0	10.1713	0
Beclin 1	42	48	LTAPLLT			5	728.455	Default State	0.005	731.124	0.023742	2.25262	0.023742	10.1282	0.012809
Beclin 1	42	48	LTAPLLT			5	728.455	Default State	0.05	731.199	0.034063	2.32771	0.034063	10.1348	0.003516
Beclin 1	42	48	LTAPLLT			5	728.455	Default State	0.5	731.243	0.023332	2.37174	0.023332	10.1397	0.003245
Beclin 1	42	48	LTAPLLT			5	728.455	Default State	5	731.297	0.015341	2.42543	0.015341	10.1531	0.006082
Beclin 1	42	48	LTAPLLT			5	728.455	Default State	50	731.291	0.016765	2.41905	0.016765	10.1632	0.003805
Beclin 1	42	48	LTAPLLT			5	728.455	Lipids	0	728.872	0	0	0	10.1713	0
Beclin 1	42	48	LTAPLLT			5	728.455	Lipids	0.005	731.136	0.054441	2.26485	0.054441	10.1388	0.003984
Beclin 1	42	48	LTAPLLT			5	728.455	Lipids	0.05	731.229	0.016224	2.35762	0.016224	10.139	0.00414
Beclin 1	42	48	LTAPLLT			5	728.455	Lipids	0.5	731.263	0.024846	2.39159	0.024846	10.1462	0.0037
Beclin 1	42	48	LTAPLLT			5	728.455	Lipids	5	731.276	0.021154	2.40425	0.021154	10.157	0.004859
Beclin 1	42	48	LTAPLLT			5	728.455	Lipids	50	731.287	0.003729	2.415	0.003729	10.1698	0.002365
Beclin 1	44	57	APLLTTAQAKPGET			11	1397.76	Default State	0	1398.4	0	0	0	8.60824	0
Beclin 1	44	57	APLLTTAQAKPGET			11	1397.76	Default State	0.005	1398.82	0.045296	0.424184	0.045296	8.56481	0.012054
Beclin 1	44	57	APLLTTAQAKPGET			11	1397.76	Default State	0.05	1399.08	0.008917	0.679378	0.008917	8.5791	0.002528
Beclin 1	44	57	APLLTTAQAKPGET			11	1397.76	Default State	0.5	1399.22	0.035035	0.826032	0.035035	8.58355	0.005976
Beclin 1	44	57	APLLTTAQAKPGET			11	1397.76	Default State	5	1399.72	0.109693	1.32458	0.109693	8.59895	0.007044
Beclin 1	44	57	APLLTTAQAKPGET			11	1397.76	Default State	50	1400.45	0.113445	2.05632	0.113445	8.61169	0.007158
Beclin 1	44	57	APLLTTAQAKPGET			11	1397.76	Lipids	0	1398.4	0	0	0	8.60824	0
Beclin 1	44	57	APLLTTAQAKPGET			11	1397.76	Lipids	0.005	1398.85	0.008805	0.449005	0.008805	8.58023	0.001402
Beclin 1	44	57	APLLTTAQAKPGET			11	1397.76	Lipids	0.05	1399.13	0.041482	0.731254	0.041482	8.58891	0.003703
Beclin 1	44	57	APLLTTAQAKPGET			11	1397.76	Lipids	0.5	1399.32	0.077925	0.926225	0.077925	8.58837	0.004471
Beclin 1	44	57	APLLTTAQAKPGET			11	1397.76	Lipids	5	1399.9	0.13784	1.50666	0.13784	8.60368	0.002241
Beclin 1	44	57	APLLTTAQAKPGET			11	1397.76	Lipids	50	1400.31	0.063057	1.91737	0.063057	8.6221	0.003363
Beclin 1	48	59	TTAQAKPGETQE			10	1260.61	Default State	0	1261.15	0	0	0	4.94875	0
Beclin 1	48	59	TTAQAKPGETQE			10	1260.61	Default State	0.005	1265.88	0.073362	4.72862	0.073362	4.94175	0.002177
Beclin 1	48	59	TTAQAKPGETQE			10	1260.61	Default State	0.05	1265.83	0.102338	4.67438	0.102338	4.94243	0.002905
Beclin 1	48	59	TTAQAKPGETQE			10	1260.61	Default State	0.5	1265.83	0.048149	4.67922	0.048149	4.94484	0.002409
Beclin 1	48	59	TTAQAKPGETQE			10	1260.61	Default State	5	1265.92	0.047525	4.76285	0.047525	4.94561	0.003802
Beclin 1	48	59	TTAQAKPGETQE			10	1260.61	Default State	50	1265.86	0.057438	4.70751	0.057438	4.94952	0.002901
Beclin 1	48	59	TTAQAKPGETQE			10	1260.61	Lipids	0	1261.15	0	0	0	4.94875	0
Beclin 1	48	59	TTAQAKPGETQE			10	1260.61	Lipids	0.005	1265.94	0.020322	4.79062	0.020322	4.94488	0.004297
Beclin 1	48	59	TTAQAKPGETQE			10	1260.61	Lipids	0.05	1265.8	0.08705	4.65154	0.08705	4.95316	0.004811
Beclin 1	48	59	TTAQAKPGETQE			10	1260.61	Lipids	0.5	1265.76	0.017169	4.6074	0.017169	4.94467	0.00137
Beclin 1	48	59	TTAQAKPGETQE			10	1260.61	Lipids	5	1265.84	0.045241	4.68612	0.045241	4.94893	0.001339
Beclin 1	48	59	TTAQAKPGETQE			10	1260.61	Lipids	50	1265.82	0.035096	4.66978	0.035096	4.9481	0.00441
Beclin 1	49	59	TAQAKPGETQE			9	1159.56	Default State	0	1160.07	0	0	0	4.86819	0
Beclin 1	49	59	TAQAKPGETQE			9	1159.56	Default State	0.005	1164.32	0.069561	4.25179	0.069561	4.86704	0.00073
Beclin 1	49	59	TAQAKPGETQE			9	1159.56	Default State	0.05	1164.16	0.135781	4.08839	0.135781	4.86349	0.001815
Beclin 1	49	59	TAQAKPGETQE			9	1159.56	Default State	0.5	1164.18	0.068713	4.10674	0.068713	4.87096	0.002867
Beclin 1	49	59	TAQAKPGETQE			9	1159.56	Default State	5	1164.24	0.107301	4.16648	0.107301	4.86996	0.001509
Beclin 1	49	59	TAQAKPGETQE			9	1159.56	Default State	50	1164.2	0.036852	4.12946	0.036852	4.87058	0.002604
Beclin 1	49	59	TAQAKPGETQE			9	1159.56	Lipids	0	1160.07	0	0	0	4.86819	0
Beclin 1	49	59	TAQAKPGETQE			9	1159.56	Lipids	0.005	1164.35	0.004885	4.28083	0.004885	4.87046	0.002263
Beclin 1	49	59	TAQAKPGETQE			9	1159.56	Lipids	0.05	1164.27	0.055315	4.2027	0.055315	4.87204	0.00173
Beclin 1	49	59	TAQAKPGETQE			9	1159.56	Lipids	0.5	1164.12	0.091105	4.05149	0.091105	4.86726	0.004218
Beclin 1	49	59	TAQAKPGETQE			9	1159.56	Lipids	5	1164.16	0.105253	4.08848	0.105253	4.87164	0.00132
Beclin 1	49	59	TAQAKPGETQE			9	1159.56	Lipids	50	1164.18	0.062413	4.10666	0.062413	4.87228	0.001958
Beclin 1	60	72	EETNSGEEPFIET			11	1481.63	Default State	0	1482.35	0	0	0	10.0072	0
Beclin 1	60	72	EETNSGEEPFIET			11	1481.63	Default State	0.005	1485.57	0.126052	3.21704	0.126052	9.97418	0.011755
Beclin 1	60	72	EETNSGEEPFIET			11	1481.63	Default State	0.05	1485.95	0.141388	3.5993	0.141388	9.97553	0.003537
Beclin 1	60	72	EETNSGEEPFIET			11	1481.63	Default State	0.5	1485.88	0.116184	3.52626	0.116184	9.98049	0.004919
Beclin 1	60	72	EETNSGEEPFIET			11	1481.63	Default State	5	1486.08	0.04419	3.72472	0.04419	9.99252	0.005499
Beclin 1	60	72	EETNSGEEPFIET			11	1481.63	Default State	50	1485.98	0.218505	3.6286	0.218505	10.0082	0.014639
Beclin 1	60	72	EETNSGEEPFIET			11	1481.63	Lipids	0	1482.35	0	0	0	10.0072	0
Beclin 1	60	72	EETNSGEEPFIET			11	1481.63	Lipids	0.005	1485.81	0.120248	3.45096	0.120248	9.98145	0.006415
Beclin 1	60	72	EETNSGEEPFIET			11	1481.63	Lipids	0.05	1485.89	0.070312	3.53519	0.070312	9.97844	0.00669
Beclin 1	60	72	EETNSGEEPFIET			11	1481.63	Lipids	0.5	1485.95	0.109312	3.59399	0.109312	9.98789	0.005343
Beclin 1	60	72	EETNSGEEPFIET			11	1481.63	Lipids	5	1486.06	0.074035	3.70108	0.074035	9.99539	0.002593
Beclin 1	60	72	EETNSGEEPFIET			11	1481.63	Lipids	50	1486.07	0.032031	3.71881	0.032031	10.0031	0.00369
Beclin 1	60	79	EETNSGEEPFIETPRQDGVS			17	2220.99	Default State	0	2222.2	0.024881	0	0	9.24159	0.002438
Beclin 1	60	79	EETNSGEEPFIETPRQDGVS			17	2220.99	Default State	0.005	2228.22	0.413908	6.01686	0.414655	9.20272	0.009312
Beclin 1	60	79	EETNSGEEPFIETPRQDGVS			17	2220.99	Default State	0.05	2228.74	0.067437	6.53708	0.071881	9.21089	0.005442
Beclin 1	60	79	EETNSGEEPFIETPRQDGVS			17	2220.99	Default State	0.5	2228.76	0.107384	6.55794	0.110229	9.21447	0.005542
Beclin 1	60	79	EETNSGEEPFIETPRQDGVS			17	2220.99	Default State	5	2228.89	0.113601	6.68791	0.116294	9.23124	0.005667
Beclin 1	60	79	EETNSGEEPFIETPRQDGVS			17	2220.99	Default State	50	2228.82	0.064887	6.61458	0.069494	9.22714	0.018008
Beclin 1	60	79	EETNSGEEPFIETPRQDGVS			17	2220.99	Lipids	0	2222.2	0.024881	0	0	9.24159	0.002438
Beclin 1	60	79	EETNSGEEPFIETPRQDGVS			17	2220.99	Lipids	0.005	2228.49	0.203794	6.29115	0.205307	9.2194	0.006713
Beclin 1	60	79	EETNSGEEPFIETPRQDGVS			17	2220.99	Lipids	0.05	2228.74	0.197953	6.53822	0.199511	9.20874	0.014716
Beclin 1	60	79	EETNSGEEPFIETPRQDGVS			17	2220.99	Lipids	0.5	2228.71	0.227811	6.50953	0.229166	9.22156	0.004144
Beclin 1	60	79	EETNSGEEPFIETPRQDGVS			17	2220.99	Lipids	5	2228.92	0.282768	6.71961	0.28386	9.23624	0.008422
Beclin 1	60	79	EETNSGEEPFIETPRQDGVS			17	2220.99	Lipids	50	2228.72	0.360963	6.51421	0.36182	9.24623	0.003789
Beclin 1	61	77	ETNSGEEPFIETPRQDG			14	1905.85	Default State	0	1906.95	0	0	0	12.8105	0
Beclin 1	61	77	ETNSGEEPFIETPRQDG			14	1905.85	Default State	0.005	1908.78	0.169034	1.82692	0.169034	12.8037	0.003371
Beclin 1	61	77	ETNSGEEPFIETPRQDG			14	1905.85	Default State	0.05	1909.92	0.130524	2.97109	0.130524	12.8047	0.006522
Beclin 1	61	77	ETNSGEEPFIETPRQDG			14	1905.85	Default State	0.5	1910.24	0.032258	3.28233	0.032258	12.7996	0.008395
Beclin 1	61	77	ETNSGEEPFIETPRQDG			14	1905.85	Default State	5	1911.23	0.128394	4.28024	0.128394	12.8192	0.007582
Beclin 1	61	77	ETNSGEEPFIETPRQDG			14	1905.85	Default State	50	1912.59	0.008681	5.63524	0.008681	12.8247	0.002779
Beclin 1	61	77	ETNSGEEPFIETPRQDG			14	1905.85	Lipids	0	1906.95	0	0	0	12.8105	0
Beclin 1	61	77	ETNSGEEPFIETPRQDG			14	1905.85	Lipids	0.005	1908.79	0.124859	1.83646	0.124859	12.7955	0.009373
Beclin 1	61	77	ETNSGEEPFIETPRQDG			14	1905.85	Lipids	0.05	1909.76	0.112645	2.80419	0.112645	12.8045	0.00592
Beclin 1	61	77	ETNSGEEPFIETPRQDG			14	1905.85	Lipids	0.5	1910.34	0.121819	3.38947	0.121819	12.7945	0.003869
Beclin 1	61	77	ETNSGEEPFIETPRQDG			14	1905.85	Lipids	5	1911.37	0.086159	4.41232	0.086159	12.8027	0.006394
Beclin 1	61	77	ETNSGEEPFIETPRQDG			14	1905.85	Lipids	50	1912.6	0.055751	5.64743	0.055751	12.8199	0.00425
Beclin 1	73	88	PRQDGVSRRFIPPARM			12	1883.02	Default State	0	1884.06	0.047249	0	0	7.62068	0.000664
Beclin 1	73	88	PRQDGVSRRFIPPARM			12	1883.02	Default State	0.005	1889.32	0.095645	5.25854	0.10668	7.57211	0.015497
Beclin 1	73	88	PRQDGVSRRFIPPARM			12	1883.02	Default State	0.05	1889.61	0.063474	5.55545	0.079129	7.58958	0.00191
Beclin 1	73	88	PRQDGVSRRFIPPARM			12	1883.02	Default State	0.5	1889.77	0.131561	5.71483	0.139789	7.59342	0.008353
Beclin 1	73	88	PRQDGVSRRFIPPARM			12	1883.02	Default State	5	1889.96	0.046438	5.90074	0.06625	7.60942	0.003535
Beclin 1	73	88	PRQDGVSRRFIPPARM			12	1883.02	Default State	50	1889.99	0.230155	5.93229	0.234955	7.62998	0.003869
Beclin 1	73	88	PRQDGVSRRFIPPARM			12	1883.02	Lipids	0	1884.06	0.047249	0	0	7.62068	0.000664
Beclin 1	73	88	PRQDGVSRRFIPPARM			12	1883.02	Lipids	0.005	1889.69	0.103283	5.6273	0.113578	7.60256	0.001479
Beclin 1	73	88	PRQDGVSRRFIPPARM			12	1883.02	Lipids	0.05	1889.67	0.116968	5.60986	0.126151	7.6032	0.00171
Beclin 1	73	88	PRQDGVSRRFIPPARM			12	1883.02	Lipids	0.5	1889.82	0.128395	5.75836	0.136813	7.60637	0.011744
Beclin 1	73	88	PRQDGVSRRFIPPARM			12	1883.02	Lipids	5	1889.85	0.111421	5.79317	0.121025	7.62498	0.008362
Beclin 1	73	88	PRQDGVSRRFIPPARM			12	1883.02	Lipids	50	1890	0.14896	5.94036	0.156274	7.65093	0.007248
Beclin 1	89	96	MSTESANS			7	826.325	Default State	0	826.71	0	0	0	5.17895	0
Beclin 1	89	96	MSTESANS			7	826.325	Default State	0.005	829.797	0.048165	3.08741	0.048165	5.17046	0.000807
Beclin 1	89	96	MSTESANS			7	826.325	Default State	0.05	829.808	0.027981	3.0983	0.027981	5.1714	0.002048
Beclin 1	89	96	MSTESANS			7	826.325	Default State	0.5	829.806	0.020662	3.09585	0.020662	5.17475	0.000425
Beclin 1	89	96	MSTESANS			7	826.325	Default State	5	829.797	0.034578	3.08659	0.034578	5.17668	0.00181
Beclin 1	89	96	MSTESANS			7	826.325	Default State	50	829.79	0.001262	3.08018	0.001262	5.17751	9.71041e-05
Beclin 1	89	96	MSTESANS			7	826.325	Lipids	0	826.71	0	0	0	5.17895	0
Beclin 1	89	96	MSTESANS			7	826.325	Lipids	0.005	829.896	0.031209	3.18572	0.031209	5.17507	0.004164
Beclin 1	89	96	MSTESANS			7	826.325	Lipids	0.05	829.79	0.042542	3.07983	0.042542	5.18024	0.002475
Beclin 1	89	96	MSTESANS			7	826.325	Lipids	0.5	829.751	0.010525	3.04065	0.010525	5.17082	0.00334
Beclin 1	89	96	MSTESANS			7	826.325	Lipids	5	829.77	0.039471	3.06042	0.039471	5.17603	0.005312
Beclin 1	89	96	MSTESANS			7	826.325	Lipids	50	829.727	0.065145	3.01719	0.065145	5.17455	0.002876
Beclin 1	92	105	ESANSFTLIGEASD			13	1440.65	Default State	0	1441.62	0.024555	0	0	11.5117	0.002443
Beclin 1	92	105	ESANSFTLIGEASD			13	1440.65	Default State	0.005	1445.3	0.120251	3.68245	0.122732	11.4914	0.003679
Beclin 1	92	105	ESANSFTLIGEASD			13	1440.65	Default State	0.05	1445.58	0.110334	3.9605	0.113033	11.4962	0.005275
Beclin 1	92	105	ESANSFTLIGEASD			13	1440.65	Default State	0.5	1445.62	0.060922	3.99926	0.065685	11.5006	0.002656
Beclin 1	92	105	ESANSFTLIGEASD			13	1440.65	Default State	5	1445.67	0.085156	4.05493	0.088626	11.5259	0.008556
Beclin 1	92	105	ESANSFTLIGEASD			13	1440.65	Default State	50	1445.76	0.207748	4.14043	0.209194	11.5432	0.006052
Beclin 1	92	105	ESANSFTLIGEASD			13	1440.65	Lipids	0	1441.62	0.024555	0	0	11.5117	0.002443
Beclin 1	92	105	ESANSFTLIGEASD			13	1440.65	Lipids	0.005	1445.25	0.199058	3.62839	0.200567	11.4962	0.005426
Beclin 1	92	105	ESANSFTLIGEASD			13	1440.65	Lipids	0.05	1445.71	0.043196	4.08809	0.049688	11.4964	0.005539
Beclin 1	92	105	ESANSFTLIGEASD			13	1440.65	Lipids	0.5	1445.67	0.065265	4.05709	0.069731	11.5042	0.006865
Beclin 1	92	105	ESANSFTLIGEASD			13	1440.65	Lipids	5	1445.71	0.087884	4.09163	0.09125	11.5257	0.007707
Beclin 1	92	105	ESANSFTLIGEASD			13	1440.65	Lipids	50	1445.8	0.078103	4.18217	0.081872	11.5453	0.00308
Beclin 1	97	112	FTLIGEASDGGTMENL			15	1654.76	Default State	0	1655.76	2.27374e-13	0	0	12.3679	0
Beclin 1	97	112	FTLIGEASDGGTMENL			15	1654.76	Default State	0.005	1661.45	0.133391	5.69039	0.133391	12.3445	0.001495
Beclin 1	97	112	FTLIGEASDGGTMENL			15	1654.76	Default State	0.05	1661.38	0.083234	5.61402	0.083234	12.3451	0.007426
Beclin 1	97	112	FTLIGEASDGGTMENL			15	1654.76	Default State	0.5	1661.6	0.206013	5.83822	0.206013	12.3467	0.002538
Beclin 1	97	112	FTLIGEASDGGTMENL			15	1654.76	Default State	5	1661.93	0.052751	6.16909	0.052751	12.3599	0.011809
Beclin 1	97	112	FTLIGEASDGGTMENL			15	1654.76	Default State	50	1662.02	0.109421	6.26054	0.109421	12.3644	0.001327
Beclin 1	97	112	FTLIGEASDGGTMENL			15	1654.76	Lipids	0	1655.76	2.27374e-13	0	0	12.3679	0
Beclin 1	97	112	FTLIGEASDGGTMENL			15	1654.76	Lipids	0.005	1661.49	0.164816	5.72803	0.164816	12.3439	0.003761
Beclin 1	97	112	FTLIGEASDGGTMENL			15	1654.76	Lipids	0.05	1661.28	0.168108	5.51784	0.168108	12.34	0.003964
Beclin 1	97	112	FTLIGEASDGGTMENL			15	1654.76	Lipids	0.5	1661.64	0.040203	5.87749	0.040203	12.342	0.001219
Beclin 1	97	112	FTLIGEASDGGTMENL			15	1654.76	Lipids	5	1661.75	0.091779	5.98382	0.091779	12.3552	0.006602
Beclin 1	97	112	FTLIGEASDGGTMENL			15	1654.76	Lipids	50	1661.88	0.118625	6.12229	0.118625	12.3678	0.004082
Beclin 1	100	112	IGEASDGGTMENL			12	1293.56	Default State	0	1293.91	0	0	0	9.66253	0
Beclin 1	100	112	IGEASDGGTMENL			12	1293.56	Default State	0.005	1298.12	0.078025	4.21213	0.078025	9.62558	0.005023
Beclin 1	100	112	IGEASDGGTMENL			12	1293.56	Default State	0.05	1298.11	0.061018	4.19888	0.061018	9.62621	0.003714
Beclin 1	100	112	IGEASDGGTMENL			12	1293.56	Default State	0.5	1298.17	0.126325	4.25716	0.126325	9.63482	0.002215
Beclin 1	100	112	IGEASDGGTMENL			12	1293.56	Default State	5	1298.26	0.050414	4.34928	0.050414	9.63554	0.00828
Beclin 1	100	112	IGEASDGGTMENL			12	1293.56	Default State	50	1298.44	0.102559	4.5286	0.102559	9.63686	0.005805
Beclin 1	100	112	IGEASDGGTMENL			12	1293.56	Lipids	0	1293.91	0	0	0	9.66253	0
Beclin 1	100	112	IGEASDGGTMENL			12	1293.56	Lipids	0.005	1298.1	0.091041	4.18903	0.091041	9.63991	0.004997
Beclin 1	100	112	IGEASDGGTMENL			12	1293.56	Lipids	0.05	1298.13	0.019906	4.22166	0.019906	9.62913	0.009572
Beclin 1	100	112	IGEASDGGTMENL			12	1293.56	Lipids	0.5	1298.23	0.048401	4.31736	0.048401	9.63786	0.002199
Beclin 1	100	112	IGEASDGGTMENL			12	1293.56	Lipids	5	1298.26	0.118429	4.34971	0.118429	9.63637	0.002432
Beclin 1	100	112	IGEASDGGTMENL			12	1293.56	Lipids	50	1298.35	0.074062	4.43339	0.074062	9.64227	0.002906
Beclin 1	112	121	LSRRLKVTGD			9	1144.68	Default State	0	1145.26	0	0	0	6.03701	0
Beclin 1	112	121	LSRRLKVTGD			9	1144.68	Default State	0.005	1145.55	0.04525	0.294912	0.04525	5.98994	0.01471
Beclin 1	112	121	LSRRLKVTGD			9	1144.68	Default State	0.05	1145.57	0.115583	0.311653	0.115583	6.00514	0.003384
Beclin 1	112	121	LSRRLKVTGD			9	1144.68	Default State	0.5	1145.95	0.086959	0.693945	0.086959	6.02223	0.005953
Beclin 1	112	121	LSRRLKVTGD			9	1144.68	Default State	5	1146.51	0.042191	1.25666	0.042191	6.03562	0.004792
Beclin 1	112	121	LSRRLKVTGD			9	1144.68	Default State	50	1147.23	0.074803	1.97525	0.074803	6.06041	0.004788
Beclin 1	112	121	LSRRLKVTGD			9	1144.68	Lipids	0	1145.26	0	0	0	6.03701	0
Beclin 1	112	121	LSRRLKVTGD			9	1144.68	Lipids	0.005	1145.52	0.042321	0.266918	0.042321	6.01286	0.000377
Beclin 1	112	121	LSRRLKVTGD			9	1144.68	Lipids	0.05	1145.62	0.061612	0.365676	0.061612	6.03078	0.007504
Beclin 1	112	121	LSRRLKVTGD			9	1144.68	Lipids	0.5	1145.83	0.041504	0.576598	0.041504	6.03931	0.009879
Beclin 1	112	121	LSRRLKVTGD			9	1144.68	Lipids	5	1146.59	0.020037	1.33678	0.020037	6.05379	0.007948
Beclin 1	112	121	LSRRLKVTGD			9	1144.68	Lipids	50	1147.23	0.029544	1.97026	0.029544	6.07172	0.00554
Beclin 1	113	122	SRRLKVTGDL			9	1144.68	Default State	0	1145.34	0.05956	0	0	6.87492	0.003162
Beclin 1	113	122	SRRLKVTGDL			9	1144.68	Default State	0.005	1147.98	0.137779	2.63665	0.150101	6.84271	0.022172
Beclin 1	113	122	SRRLKVTGDL			9	1144.68	Default State	0.05	1148.79	0.083912	3.45156	0.1029	6.85084	0.005193
Beclin 1	113	122	SRRLKVTGDL			9	1144.68	Default State	0.5	1148.83	0.067929	3.48897	0.090342	6.86169	0.01037
Beclin 1	113	122	SRRLKVTGDL			9	1144.68	Default State	5	1148.85	0.059426	3.50806	0.084136	6.87537	0.004684
Beclin 1	113	122	SRRLKVTGDL			9	1144.68	Default State	50	1148.94	0.038214	3.60022	0.070765	6.91174	0.005511
Beclin 1	113	122	SRRLKVTGDL			9	1144.68	Lipids	0	1145.34	0.05956	0	0	6.87492	0.003162
Beclin 1	113	122	SRRLKVTGDL			9	1144.68	Lipids	0.005	1147.99	0.213229	2.65411	0.221391	6.85533	0.011287
Beclin 1	113	122	SRRLKVTGDL			9	1144.68	Lipids	0.05	1148.77	0.063524	3.42569	0.087078	6.87008	0.004249
Beclin 1	113	122	SRRLKVTGDL			9	1144.68	Lipids	0.5	1148.83	0.066296	3.49321	0.089121	6.87211	0.013139
Beclin 1	113	122	SRRLKVTGDL			9	1144.68	Lipids	5	1148.88	0.059009	3.53993	0.083842	6.90197	0.008379
Beclin 1	113	122	SRRLKVTGDL			9	1144.68	Lipids	50	1148.91	0.080244	3.57438	0.099932	6.92859	0.00916
Beclin 1	123	137	FDIMSGQTDVDHPLC			13	1677.72	Default State	0	1678.69	0	0	0	11.1519	0
Beclin 1	123	137	FDIMSGQTDVDHPLC			13	1677.72	Default State	0.005	1680.96	0.078456	2.26454	0.078456	11.1165	0.006685
Beclin 1	123	137	FDIMSGQTDVDHPLC			13	1677.72	Default State	0.05	1682.42	0.048569	3.73049	0.048569	11.1295	0.002015
Beclin 1	123	137	FDIMSGQTDVDHPLC			13	1677.72	Default State	0.5	1682.85	0.11004	4.15499	0.11004	11.1287	0.002621
Beclin 1	123	137	FDIMSGQTDVDHPLC			13	1677.72	Default State	5	1683.05	0.110423	4.35951	0.110423	11.1483	0.008014
Beclin 1	123	137	FDIMSGQTDVDHPLC			13	1677.72	Default State	50	1683.45	0.129469	4.75955	0.129469	11.1609	0.002713
Beclin 1	123	137	FDIMSGQTDVDHPLC			13	1677.72	Lipids	0	1678.69	0	0	0	11.1519	0
Beclin 1	123	137	FDIMSGQTDVDHPLC			13	1677.72	Lipids	0.005	1680.94	0.180638	2.25206	0.180638	11.1239	0.002438
Beclin 1	123	137	FDIMSGQTDVDHPLC			13	1677.72	Lipids	0.05	1682.48	0.118664	3.78622	0.118664	11.1264	0.002599
Beclin 1	123	137	FDIMSGQTDVDHPLC			13	1677.72	Lipids	0.5	1682.98	0.192968	4.28988	0.192968	11.1305	0.004313
Beclin 1	123	137	FDIMSGQTDVDHPLC			13	1677.72	Lipids	5	1683.3	0.089273	4.60637	0.089273	11.1473	0.007745
Beclin 1	123	137	FDIMSGQTDVDHPLC			13	1677.72	Lipids	50	1683.36	0.036964	4.66798	0.036964	11.1674	0.001286
Beclin 1	123	139	FDIMSGQTDVDHPLCEE			15	1935.81	Default State	0	1936.94	0.032504	0	0	10.9708	0.000942
Beclin 1	123	139	FDIMSGQTDVDHPLCEE			15	1935.81	Default State	0.005	1939.28	0.097953	2.34864	0.103205	10.9585	0.001097
Beclin 1	123	139	FDIMSGQTDVDHPLCEE			15	1935.81	Default State	0.05	1940.66	0.073992	3.71925	0.080817	10.9615	0.00835
Beclin 1	123	139	FDIMSGQTDVDHPLCEE			15	1935.81	Default State	0.5	1941.07	0.032418	4.13192	0.045907	10.9535	0.000737
Beclin 1	123	139	FDIMSGQTDVDHPLCEE			15	1935.81	Default State	5	1941.5	0.146849	4.56884	0.150403	10.9743	0.006203
Beclin 1	123	139	FDIMSGQTDVDHPLCEE			15	1935.81	Default State	50	1942.02	0.109316	5.07973	0.114046	10.9976	0.000268
Beclin 1	123	139	FDIMSGQTDVDHPLCEE			15	1935.81	Lipids	0	1936.94	0.032504	0	0	10.9708	0.000942
Beclin 1	123	139	FDIMSGQTDVDHPLCEE			15	1935.81	Lipids	0.005	1939.14	0.193673	2.20594	0.196381	10.9495	0.004799
Beclin 1	123	139	FDIMSGQTDVDHPLCEE			15	1935.81	Lipids	0.05	1940.67	0.148452	3.73569	0.151969	10.9544	0.002706
Beclin 1	123	139	FDIMSGQTDVDHPLCEE			15	1935.81	Lipids	0.5	1941.04	0.121406	4.10609	0.125682	10.9574	0.000576
Beclin 1	123	139	FDIMSGQTDVDHPLCEE			15	1935.81	Lipids	5	1941.43	0.17189	4.492	0.174936	10.9766	0.00391
Beclin 1	123	139	FDIMSGQTDVDHPLCEE			15	1935.81	Lipids	50	1941.97	0.115835	5.03828	0.120309	10.9961	0.000792
Beclin 1	125	136	IMSGQTDVDHPL			10	1312.62	Default State	0	1313.42	0	0	0	8.31655	0
Beclin 1	125	136	IMSGQTDVDHPL			10	1312.62	Default State	0.005	1314.95	0.040384	1.5326	0.040384	8.28059	0.017209
Beclin 1	125	136	IMSGQTDVDHPL			10	1312.62	Default State	0.05	1315.09	0.105718	1.66517	0.105718	8.29528	0.003264
Beclin 1	125	136	IMSGQTDVDHPL			10	1312.62	Default State	0.5	1315.32	0.105513	1.90467	0.105513	8.30912	0.01046
Beclin 1	125	136	IMSGQTDVDHPL			10	1312.62	Default State	5	1316.47	0.123313	3.04679	0.123313	8.32054	0.009913
Beclin 1	125	136	IMSGQTDVDHPL			10	1312.62	Default State	50	1316.8	0.057792	3.38511	0.057792	8.34394	0.004507
Beclin 1	125	136	IMSGQTDVDHPL			10	1312.62	Lipids	0	1313.42	0	0	0	8.31655	0
Beclin 1	125	136	IMSGQTDVDHPL			10	1312.62	Lipids	0.005	1314.86	0.006877	1.4383	0.006877	8.30404	0.011908
Beclin 1	125	136	IMSGQTDVDHPL			10	1312.62	Lipids	0.05	1315.13	0.044231	1.70776	0.044231	8.3095	0.002473
Beclin 1	125	136	IMSGQTDVDHPL			10	1312.62	Lipids	0.5	1315.42	0.075743	2.00451	0.075743	8.32032	0.012031
Beclin 1	125	136	IMSGQTDVDHPL			10	1312.62	Lipids	5	1316.46	0.007984	3.03878	0.007984	8.33704	0.008615
Beclin 1	125	136	IMSGQTDVDHPL			10	1312.62	Lipids	50	1316.92	0.013321	3.49864	0.013321	8.3595	0.00262
Beclin 1	146	158	DQLDTQLNVTENE			12	1518.69	Default State	0	1519.46	0	0	0	11.0715	0
Beclin 1	146	158	DQLDTQLNVTENE			12	1518.69	Default State	0.005	1519.68	0.19028	0.21885	0.19028	11.0496	0.004577
Beclin 1	146	158	DQLDTQLNVTENE			12	1518.69	Default State	0.05	1520.12	0.033767	0.661911	0.033767	11.0549	0.001918
Beclin 1	146	158	DQLDTQLNVTENE			12	1518.69	Default State	0.5	1520.14	0.04513	0.678949	0.04513	11.0657	0.00434
Beclin 1	146	158	DQLDTQLNVTENE			12	1518.69	Default State	5	1520.4	0.050856	0.943122	0.050856	11.0909	0.011781
Beclin 1	146	158	DQLDTQLNVTENE			12	1518.69	Default State	50	1520.38	0.083956	0.924676	0.083956	11.1143	0.004261
Beclin 1	146	158	DQLDTQLNVTENE			12	1518.69	Lipids	0	1519.46	0	0	0	11.0715	0
Beclin 1	146	158	DQLDTQLNVTENE			12	1518.69	Lipids	0.005	1519.8	0.051579	0.342542	0.051579	11.0553	0.001118
Beclin 1	146	158	DQLDTQLNVTENE			12	1518.69	Lipids	0.05	1520.09	0.039952	0.63197	0.039952	11.0568	0.004892
Beclin 1	146	158	DQLDTQLNVTENE			12	1518.69	Lipids	0.5	1520.08	0.149409	0.621412	0.149409	11.0675	0.004882
Beclin 1	146	158	DQLDTQLNVTENE			12	1518.69	Lipids	5	1520.38	0.165547	0.924502	0.165547	11.089	0.006099
Beclin 1	146	158	DQLDTQLNVTENE			12	1518.69	Lipids	50	1520.2	0.04777	0.745127	0.04777	11.1213	0.005491
Beclin 1	153	161	NVTENECQN			8	1050.42	Default State	0	1050.79	0	0	0	5.76874	0
Beclin 1	153	161	NVTENECQN			8	1050.42	Default State	0.005	1051.08	0.035178	0.28674	0.035178	5.76882	0.004897
Beclin 1	153	161	NVTENECQN			8	1050.42	Default State	0.05	1051.48	0.065436	0.685454	0.065436	5.76639	0.001197
Beclin 1	153	161	NVTENECQN			8	1050.42	Default State	0.5	1052.17	0.077364	1.37212	0.077364	5.77237	0.001812
Beclin 1	153	161	NVTENECQN			8	1050.42	Default State	5	1053.81	0.078666	3.01795	0.078666	5.77032	0.002388
Beclin 1	153	161	NVTENECQN			8	1050.42	Default State	50	1054.66	0.046216	3.86438	0.046216	5.77087	0.00347
Beclin 1	153	161	NVTENECQN			8	1050.42	Lipids	0	1050.79	0	0	0	5.76874	0
Beclin 1	153	161	NVTENECQN			8	1050.42	Lipids	0.005	1051.16	0.114588	0.361602	0.114588	5.77993	0.002251
Beclin 1	153	161	NVTENECQN			8	1050.42	Lipids	0.05	1051.49	0.071789	0.700583	0.071789	5.77414	0.004707
Beclin 1	153	161	NVTENECQN			8	1050.42	Lipids	0.5	1051.89	0.042953	1.10004	0.042953	5.77241	0.003784
Beclin 1	153	161	NVTENECQN			8	1050.42	Lipids	5	1053.57	0.129041	2.77738	0.129041	5.7738	0.003143
Beclin 1	153	161	NVTENECQN			8	1050.42	Lipids	50	1054.62	0.127583	3.82472	0.127583	5.7726	0.001507
Beclin 1	163	172	KRCLEILEQM			9	1262.66	Default State	0	1263.96	0	0	0	8.06084	0
Beclin 1	163	172	KRCLEILEQM			9	1262.66	Default State	0.005	1266.61	0.050655	2.65026	0.050655	8.01335	0.019436
Beclin 1	163	172	KRCLEILEQM			9	1262.66	Default State	0.05	1266.7	0.05862	2.74963	0.05862	8.02605	0.003593
Beclin 1	163	172	KRCLEILEQM			9	1262.66	Default State	0.5	1266.54	0.290244	2.58305	0.290244	8.0358	0.005708
Beclin 1	163	172	KRCLEILEQM			9	1262.66	Default State	5	1266.82	0.271112	2.86005	0.271112	8.05933	0.009878
Beclin 1	163	172	KRCLEILEQM			9	1262.66	Default State	50	1266.94	0.086078	2.98241	0.086078	8.07291	0.002873
Beclin 1	163	172	KRCLEILEQM			9	1262.66	Lipids	0	1263.96	0	0	0	8.06084	0
Beclin 1	163	172	KRCLEILEQM			9	1262.66	Lipids	0.005	1266.43	0.152076	2.47048	0.152076	8.04042	0.006747
Beclin 1	163	172	KRCLEILEQM			9	1262.66	Lipids	0.05	1266.81	0.142961	2.85109	0.142961	8.04182	0.004446
Beclin 1	163	172	KRCLEILEQM			9	1262.66	Lipids	0.5	1266.71	0.208618	2.75569	0.208618	8.0531	0.010424
Beclin 1	163	172	KRCLEILEQM			9	1262.66	Lipids	5	1266.89	0.169969	2.93854	0.169969	8.07012	0.008114
Beclin 1	163	172	KRCLEILEQM			9	1262.66	Lipids	50	1266.9	0.111852	2.94065	0.111852	8.08512	0.003583
Beclin 1	201	212	VEKNRKIVAENL			11	1412.82	Default State	0	1413.49	0.058262	0	0	6.81205	0.003171
Beclin 1	201	212	VEKNRKIVAENL			11	1412.82	Default State	0.005	1413.51	0.134245	0.024013	0.146343	6.77525	0.015804
Beclin 1	201	212	VEKNRKIVAENL			11	1412.82	Default State	0.05	1413.68	0.08447	0.194576	0.102614	6.79873	0.005275
Beclin 1	201	212	VEKNRKIVAENL			11	1412.82	Default State	0.5	1413.86	0.094324	0.373184	0.110867	6.80612	0.003986
Beclin 1	201	212	VEKNRKIVAENL			11	1412.82	Default State	5	1414.85	0.106897	1.35594	0.121744	6.82047	0.004606
Beclin 1	201	212	VEKNRKIVAENL			11	1412.82	Default State	50	1416.39	0.147779	2.90271	0.158849	6.83575	0.002378
Beclin 1	201	212	VEKNRKIVAENL			11	1412.82	Lipids	0	1413.49	0.058262	0	0	6.81205	0.003171
Beclin 1	201	212	VEKNRKIVAENL			11	1412.82	Lipids	0.005	1413.7	0.065278	0.214265	0.087497	6.8089	0.010457
Beclin 1	201	212	VEKNRKIVAENL			11	1412.82	Lipids	0.05	1413.73	0.063843	0.240743	0.086432	6.82067	0.008793
Beclin 1	201	212	VEKNRKIVAENL			11	1412.82	Lipids	0.5	1413.89	0.041672	0.399762	0.071631	6.81816	0.010221
Beclin 1	201	212	VEKNRKIVAENL			11	1412.82	Lipids	5	1414.42	0.143049	0.933348	0.154458	6.83606	0.00589
Beclin 1	201	212	VEKNRKIVAENL			11	1412.82	Lipids	50	1415.5	0.292811	2.00737	0.298551	6.85203	0.003966
Beclin 1	211	224	NLEKVQAEAERLDQ			13	1642.84	Default State	0	1643.72	2.27374e-13	0	0	5.41873	0
Beclin 1	211	224	NLEKVQAEAERLDQ			13	1642.84	Default State	0.005	1649.06	0.262611	5.34654	0.262611	5.40276	0.001894
Beclin 1	211	224	NLEKVQAEAERLDQ			13	1642.84	Default State	0.05	1649.49	0.036873	5.77068	0.036873	5.4055	0.002543
Beclin 1	211	224	NLEKVQAEAERLDQ			13	1642.84	Default State	0.5	1649.29	0.099628	5.56764	0.099628	5.4143	0.002196
Beclin 1	211	224	NLEKVQAEAERLDQ			13	1642.84	Default State	5	1649.47	0.063248	5.7478	0.063248	5.4177	0.002079
Beclin 1	211	224	NLEKVQAEAERLDQ			13	1642.84	Default State	50	1649.46	0.112843	5.74453	0.112843	5.42324	0.001441
Beclin 1	211	224	NLEKVQAEAERLDQ			13	1642.84	Lipids	0	1643.72	2.27374e-13	0	0	5.41873	0
Beclin 1	211	224	NLEKVQAEAERLDQ			13	1642.84	Lipids	0.005	1649.22	0.011528	5.49959	0.011528	5.41592	0.001942
Beclin 1	211	224	NLEKVQAEAERLDQ			13	1642.84	Lipids	0.05	1649.49	0.083679	5.77403	0.083679	5.41693	0.004503
Beclin 1	211	224	NLEKVQAEAERLDQ			13	1642.84	Lipids	0.5	1649.36	0.102498	5.6451	0.102498	5.4163	0.003975
Beclin 1	211	224	NLEKVQAEAERLDQ			13	1642.84	Lipids	5	1649.41	0.142798	5.69067	0.142798	5.42464	0.002882
Beclin 1	211	224	NLEKVQAEAERLDQ			13	1642.84	Lipids	50	1649.62	0.081057	5.89984	0.081057	5.42553	0.001111
Beclin 1	227	236	AQYQREYSEF			9	1320.59	Default State	0	1321.2	0	0	0	10.7476	0
Beclin 1	227	236	AQYQREYSEF			9	1320.59	Default State	0.005	1322.79	0.027006	1.59356	0.027006	10.7225	0.010369
Beclin 1	227	236	AQYQREYSEF			9	1320.59	Default State	0.05	1323.1	0.051063	1.90159	0.051063	10.7284	0.003092
Beclin 1	227	236	AQYQREYSEF			9	1320.59	Default State	0.5	1323.15	0.055483	1.95602	0.055483	10.7343	0.005
Beclin 1	227	236	AQYQREYSEF			9	1320.59	Default State	5	1323.99	0.02616	2.79739	0.02616	10.757	0.009039
Beclin 1	227	236	AQYQREYSEF			9	1320.59	Default State	50	1324.61	0.090231	3.41385	0.090231	10.7726	0.001196
Beclin 1	227	236	AQYQREYSEF			9	1320.59	Lipids	0	1321.2	0	0	0	10.7476	0
Beclin 1	227	236	AQYQREYSEF			9	1320.59	Lipids	0.005	1322.83	0.049877	1.63818	0.049877	10.7322	0.003782
Beclin 1	227	236	AQYQREYSEF			9	1320.59	Lipids	0.05	1323.1	0.041261	1.90704	0.041261	10.7278	0.003055
Beclin 1	227	236	AQYQREYSEF			9	1320.59	Lipids	0.5	1323.39	0.042757	2.19723	0.042757	10.7439	0.00839
Beclin 1	227	236	AQYQREYSEF			9	1320.59	Lipids	5	1324.02	0.036663	2.82129	0.036663	10.7581	0.005862
Beclin 1	227	236	AQYQREYSEF			9	1320.59	Lipids	50	1324.67	0.060918	3.47145	0.060918	10.777	0.004374
Beclin 1	236	247	FKRQQLELDDEL			11	1533.79	Default State	0	1534.72	0.05713	0	0	6.46102	0.002712
Beclin 1	236	247	FKRQQLELDDEL			11	1533.79	Default State	0.005	1534.74	0.072391	0.017224	0.092219	6.42686	0.00963
Beclin 1	236	247	FKRQQLELDDEL			11	1533.79	Default State	0.05	1534.76	0.08486	0.034729	0.102299	6.44042	0.003154
Beclin 1	236	247	FKRQQLELDDEL			11	1533.79	Default State	0.5	1534.8	0.071763	0.073917	0.091726	6.4472	0.002914
Beclin 1	236	247	FKRQQLELDDEL			11	1533.79	Default State	5	1534.75	0.098655	0.031709	0.114003	6.47416	0.004023
Beclin 1	236	247	FKRQQLELDDEL			11	1533.79	Default State	50	1534.62	0.134391	-0.103979	0.14603	6.4858	0.007729
Beclin 1	236	247	FKRQQLELDDEL			11	1533.79	Lipids	0	1534.72	0.05713	0	0	6.46102	0.002712
Beclin 1	236	247	FKRQQLELDDEL			11	1533.79	Lipids	0.005	1534.8	0.056459	0.074667	0.080321	6.44734	0.006037
Beclin 1	236	247	FKRQQLELDDEL			11	1533.79	Lipids	0.05	1534.74	0.087337	0.017535	0.104363	6.45916	0.003391
Beclin 1	236	247	FKRQQLELDDEL			11	1533.79	Lipids	0.5	1534.65	0.120093	-0.073708	0.132989	6.46154	0.009579
Beclin 1	236	247	FKRQQLELDDEL			11	1533.79	Lipids	5	1534.72	0.054014	-0.004223	0.078621	6.48125	0.013116
Beclin 1	236	247	FKRQQLELDDEL			11	1533.79	Lipids	50	1534.67	0.124892	-0.049488	0.137338	6.49561	0.005034
Beclin 1	244	261	DDELKSVENQMRYAQTQL			17	2168.03	Default State	0	2169.06	0	0	0	11.3205	0
Beclin 1	244	261	DDELKSVENQMRYAQTQL			17	2168.03	Default State	0.005	2169.38	0.075217	0.314739	0.075217	11.3105	0.001432
Beclin 1	244	261	DDELKSVENQMRYAQTQL			17	2168.03	Default State	0.05	2169.47	0.056725	0.401437	0.056725	11.3137	0.008031
Beclin 1	244	261	DDELKSVENQMRYAQTQL			17	2168.03	Default State	0.5	2169.46	0.051594	0.393575	0.051594	11.3191	0.001025
Beclin 1	244	261	DDELKSVENQMRYAQTQL			17	2168.03	Default State	5	2169.57	0.040134	0.509809	0.040134	11.3417	0.004434
Beclin 1	244	261	DDELKSVENQMRYAQTQL			17	2168.03	Default State	50	2170.37	0.094369	1.30516	0.094369	11.3465	0.004235
Beclin 1	244	261	DDELKSVENQMRYAQTQL			17	2168.03	Lipids	0	2169.06	0	0	0	11.3205	0
Beclin 1	244	261	DDELKSVENQMRYAQTQL			17	2168.03	Lipids	0.005	2169.46	0.017569	0.390484	0.017569	11.3157	0.004593
Beclin 1	244	261	DDELKSVENQMRYAQTQL			17	2168.03	Lipids	0.05	2169.51	0.093539	0.446576	0.093539	11.3121	0.007456
Beclin 1	244	261	DDELKSVENQMRYAQTQL			17	2168.03	Lipids	0.5	2169.54	0.059344	0.479873	0.059344	11.3145	0.006028
Beclin 1	244	261	DDELKSVENQMRYAQTQL			17	2168.03	Lipids	5	2169.68	0.048376	0.616055	0.048376	11.3344	0.006034
Beclin 1	244	261	DDELKSVENQMRYAQTQL			17	2168.03	Lipids	50	2170.45	0.246382	1.38242	0.246382	11.3542	0.004374
Beclin 1	262	270	DKLKKTNVF			8	1092.64	Default State	0	1092.98	0	0	0	7.03565	0
Beclin 1	262	270	DKLKKTNVF			8	1092.64	Default State	0.005	1093.84	0.068399	0.862772	0.068399	7.01556	0.006246
Beclin 1	262	270	DKLKKTNVF			8	1092.64	Default State	0.05	1094.39	0.070023	1.41323	0.070023	7.0103	0.002066
Beclin 1	262	270	DKLKKTNVF			8	1092.64	Default State	0.5	1094.64	0.085271	1.6622	0.085271	7.02147	0.009766
Beclin 1	262	270	DKLKKTNVF			8	1092.64	Default State	5	1095.12	0.099724	2.14087	0.099724	7.0439	0.00778
Beclin 1	262	270	DKLKKTNVF			8	1092.64	Default State	50	1095.59	0.204424	2.61124	0.204424	7.06936	0.003102
Beclin 1	262	270	DKLKKTNVF			8	1092.64	Lipids	0	1092.98	0	0	0	7.03565	0
Beclin 1	262	270	DKLKKTNVF			8	1092.64	Lipids	0.005	1093.72	0.109954	0.738029	0.109954	7.02207	0.013873
Beclin 1	262	270	DKLKKTNVF			8	1092.64	Lipids	0.05	1094.17	0.044974	1.18509	0.044974	7.0349	0.000858
Beclin 1	262	270	DKLKKTNVF			8	1092.64	Lipids	0.5	1094.11	0.100647	1.13282	0.100647	7.04417	0.003547
Beclin 1	262	270	DKLKKTNVF			8	1092.64	Lipids	5	1094.63	0.045835	1.65235	0.045835	7.06285	0.009321
Beclin 1	262	270	DKLKKTNVF			8	1092.64	Lipids	50	1095.24	0.169618	2.25834	0.169618	7.08512	0.004206
Beclin 1	262	274	DKLKKTNVFNATF			12	1525.84	Default State	0	1526.59	0.043324	0	0	9.67681	0.007105
Beclin 1	262	274	DKLKKTNVFNATF			12	1525.84	Default State	0.005	1527.39	0.125163	0.806819	0.132449	9.63392	0.010972
Beclin 1	262	274	DKLKKTNVFNATF			12	1525.84	Default State	0.05	1527.95	0.052536	1.36404	0.068095	9.64139	0.005378
Beclin 1	262	274	DKLKKTNVFNATF			12	1525.84	Default State	0.5	1528.38	0.190045	1.79124	0.194921	9.65	0.010386
Beclin 1	262	274	DKLKKTNVFNATF			12	1525.84	Default State	5	1529.07	0.138176	2.48754	0.144809	9.66889	0.010026
Beclin 1	262	274	DKLKKTNVFNATF			12	1525.84	Default State	50	1530.19	0.045072	3.60081	0.062517	9.69226	0.005538
Beclin 1	262	274	DKLKKTNVFNATF			12	1525.84	Lipids	0	1526.59	0.043324	0	0	9.67681	0.007105
Beclin 1	262	274	DKLKKTNVFNATF			12	1525.84	Lipids	0.005	1527.31	0.216152	0.720551	0.220451	9.65593	0.006381
Beclin 1	262	274	DKLKKTNVFNATF			12	1525.84	Lipids	0.05	1527.87	0.183137	1.27906	0.188192	9.64349	0.016328
Beclin 1	262	274	DKLKKTNVFNATF			12	1525.84	Lipids	0.5	1528.12	0.06879	1.53422	0.081296	9.67386	0.007705
Beclin 1	262	274	DKLKKTNVFNATF			12	1525.84	Lipids	5	1528.56	0.194146	1.96928	0.198921	9.68412	0.008521
Beclin 1	262	274	DKLKKTNVFNATF			12	1525.84	Lipids	50	1529.7	0.173578	3.11294	0.178903	9.71168	0.008953
Beclin 1	275	287	HIWHSGQFGTINN			12	1510.72	Default State	0	1511.48	0.030428	0	0	8.60442	0.000181
Beclin 1	275	287	HIWHSGQFGTINN			12	1510.72	Default State	0.005	1512.04	0.111933	0.555567	0.115995	8.54675	0.016105
Beclin 1	275	287	HIWHSGQFGTINN			12	1510.72	Default State	0.05	1512.4	0.02175	0.924463	0.037402	8.56626	0.000684
Beclin 1	275	287	HIWHSGQFGTINN			12	1510.72	Default State	0.5	1512.8	0.052673	1.32444	0.06083	8.58797	0.003176
Beclin 1	275	287	HIWHSGQFGTINN			12	1510.72	Default State	5	1513.23	0.035588	1.74855	0.046823	8.59672	0.009536
Beclin 1	275	287	HIWHSGQFGTINN			12	1510.72	Default State	50	1513.77	0.05641	2.28539	0.064093	8.62682	0.01322
Beclin 1	275	287	HIWHSGQFGTINN			12	1510.72	Lipids	0	1511.48	0.030428	0	0	8.60442	0.000181
Beclin 1	275	287	HIWHSGQFGTINN			12	1510.72	Lipids	0.005	1512.23	0.047258	0.753571	0.056207	8.57787	0.004989
Beclin 1	275	287	HIWHSGQFGTINN			12	1510.72	Lipids	0.05	1512.38	0.081301	0.903707	0.086808	8.58141	0.001071
Beclin 1	275	287	HIWHSGQFGTINN			12	1510.72	Lipids	0.5	1512.71	0.055394	1.2289	0.063201	8.5924	0.01058
Beclin 1	275	287	HIWHSGQFGTINN			12	1510.72	Lipids	5	1513.06	0.108656	1.57935	0.112836	8.61006	0.006859
Beclin 1	275	287	HIWHSGQFGTINN			12	1510.72	Lipids	50	1513.62	0.201728	2.1433	0.20401	8.6463	0.002524
Beclin 1	276	294	IWHSGQFGTINNFRLGRLP			17	2213.17	Default State	0	2214.29	0.031983	0	0	5.55422	0.005567
Beclin 1	276	294	IWHSGQFGTINNFRLGRLP			17	2213.17	Default State	0.005	2215.62	0.141558	1.33018	0.145126	5.52754	0.009541
Beclin 1	276	294	IWHSGQFGTINNFRLGRLP			17	2213.17	Default State	0.05	2216.08	0.130725	1.79866	0.134581	5.54054	0.003256
Beclin 1	276	294	IWHSGQFGTINNFRLGRLP			17	2213.17	Default State	0.5	2216.39	0.174139	2.10237	0.177052	5.54926	0.009106
Beclin 1	276	294	IWHSGQFGTINNFRLGRLP			17	2213.17	Default State	5	2216.34	0.254454	2.05011	0.256457	5.56956	0.005023
Beclin 1	276	294	IWHSGQFGTINNFRLGRLP			17	2213.17	Default State	50	2216.66	0.119901	2.37651	0.124094	5.60827	0.014458
Beclin 1	276	294	IWHSGQFGTINNFRLGRLP			17	2213.17	Lipids	0	2214.29	0.031983	0	0	5.55422	0.005567
Beclin 1	276	294	IWHSGQFGTINNFRLGRLP			17	2213.17	Lipids	0.005	2215.79	0.104873	1.50546	0.109642	5.54141	0.00408
Beclin 1	276	294	IWHSGQFGTINNFRLGRLP			17	2213.17	Lipids	0.05	2216.01	0.096651	1.72772	0.101805	5.55865	0.003853
Beclin 1	276	294	IWHSGQFGTINNFRLGRLP			17	2213.17	Lipids	0.5	2216.44	0.165113	2.15198	0.168182	5.56755	0.008635
Beclin 1	276	294	IWHSGQFGTINNFRLGRLP			17	2213.17	Lipids	5	2216.49	0.242421	2.20278	0.244522	5.59166	0.007492
Beclin 1	276	294	IWHSGQFGTINNFRLGRLP			17	2213.17	Lipids	50	2216.57	0.183913	2.28369	0.186673	5.64669	0.058007
Beclin 1	288	302	FRLGRLPSVPVEWNE			12	1798.96	Default State	0	1800.05	0	0	0	11.2996	0
Beclin 1	288	302	FRLGRLPSVPVEWNE			12	1798.96	Default State	0.005	1801.37	0.060349	1.31037	0.060349	11.2749	0.005246
Beclin 1	288	302	FRLGRLPSVPVEWNE			12	1798.96	Default State	0.05	1801.69	0.08423	1.63081	0.08423	11.2858	0.001553
Beclin 1	288	302	FRLGRLPSVPVEWNE			12	1798.96	Default State	0.5	1801.93	0.059736	1.87574	0.059736	11.2915	0.003461
Beclin 1	288	302	FRLGRLPSVPVEWNE			12	1798.96	Default State	5	1802.94	0.205126	2.88071	0.205126	11.3287	0.009335
Beclin 1	288	302	FRLGRLPSVPVEWNE			12	1798.96	Default State	50	1803.51	0.116362	3.45723	0.116362	11.3638	0.010506
Beclin 1	288	302	FRLGRLPSVPVEWNE			12	1798.96	Lipids	0	1800.05	0	0	0	11.2996	0
Beclin 1	288	302	FRLGRLPSVPVEWNE			12	1798.96	Lipids	0.005	1801.32	0.051572	1.26229	0.051572	11.2874	0.003481
Beclin 1	288	302	FRLGRLPSVPVEWNE			12	1798.96	Lipids	0.05	1801.45	0.113642	1.39137	0.113642	11.2896	0.007746
Beclin 1	288	302	FRLGRLPSVPVEWNE			12	1798.96	Lipids	0.5	1801.61	0.129106	1.55387	0.129106	11.2938	0.007599
Beclin 1	288	302	FRLGRLPSVPVEWNE			12	1798.96	Lipids	5	1802.59	0.076229	2.53833	0.076229	11.3267	0.006983
Beclin 1	288	302	FRLGRLPSVPVEWNE			12	1798.96	Lipids	50	1802.73	0.069265	2.67975	0.069265	11.38	0.011567
Beclin 1	290	303	LGRLPSVPVEWNEI			11	1608.87	Default State	0	1609.74	0	0	0	6.84382	0
Beclin 1	290	303	LGRLPSVPVEWNEI			11	1608.87	Default State	0.005	1614.75	0.029792	5.00918	0.029792	6.82393	0.00877
Beclin 1	290	303	LGRLPSVPVEWNEI			11	1608.87	Default State	0.05	1614.78	0.095779	5.03669	0.095779	6.82951	0.004566
Beclin 1	290	303	LGRLPSVPVEWNEI			11	1608.87	Default State	0.5	1614.88	0.040555	5.1357	0.040555	6.83571	0.002285
Beclin 1	290	303	LGRLPSVPVEWNEI			11	1608.87	Default State	5	1615.04	0.117608	5.2964	0.117608	6.83973	0.003253
Beclin 1	290	303	LGRLPSVPVEWNEI			11	1608.87	Default State	50	1615.03	0.051381	5.28734	0.051381	6.85489	0.001703
Beclin 1	290	303	LGRLPSVPVEWNEI			11	1608.87	Lipids	0	1609.74	0	0	0	6.84382	0
Beclin 1	290	303	LGRLPSVPVEWNEI			11	1608.87	Lipids	0.005	1614.88	0.048402	5.14113	0.048402	6.83701	0.006532
Beclin 1	290	303	LGRLPSVPVEWNEI			11	1608.87	Lipids	0.05	1614.9	0.070539	5.1596	0.070539	6.83851	0.00324
Beclin 1	290	303	LGRLPSVPVEWNEI			11	1608.87	Lipids	0.5	1615.05	0.06017	5.30687	0.06017	6.83932	0.008722
Beclin 1	290	303	LGRLPSVPVEWNEI			11	1608.87	Lipids	5	1615.04	0.128006	5.30299	0.128006	6.84576	0.004159
Beclin 1	290	303	LGRLPSVPVEWNEI			11	1608.87	Lipids	50	1614.99	0.038636	5.24683	0.038636	6.86355	0.004414
Beclin 1	297	304	PVEWNEIN			6	1000.47	Default State	0	1000.79	0	0	0	10.9615	0
Beclin 1	297	304	PVEWNEIN			6	1000.47	Default State	0.005	1001.65	0.051413	0.855917	0.051413	10.9565	0.003349
Beclin 1	297	304	PVEWNEIN			6	1000.47	Default State	0.05	1001.93	0.096211	1.13485	0.096211	10.9512	0.006364
Beclin 1	297	304	PVEWNEIN			6	1000.47	Default State	0.5	1002.31	0.152047	1.52362	0.152047	10.9557	0.003527
Beclin 1	297	304	PVEWNEIN			6	1000.47	Default State	5	1002.5	0.063515	1.71364	0.063515	10.969	0.01019
Beclin 1	297	304	PVEWNEIN			6	1000.47	Default State	50	1002.73	0.158465	1.94194	0.158465	10.9814	0.005442
Beclin 1	297	304	PVEWNEIN			6	1000.47	Lipids	0	1000.79	0	0	0	10.9615	0
Beclin 1	297	304	PVEWNEIN			6	1000.47	Lipids	0.005	1001.58	0.027719	0.793094	0.027719	10.9548	0.005239
Beclin 1	297	304	PVEWNEIN			6	1000.47	Lipids	0.05	1001.83	0.028855	1.03698	0.028855	10.9511	0.001701
Beclin 1	297	304	PVEWNEIN			6	1000.47	Lipids	0.5	1002.15	0.112168	1.3607	0.112168	10.9557	0.004951
Beclin 1	297	304	PVEWNEIN			6	1000.47	Lipids	5	1002.44	0.069911	1.64654	0.069911	10.9677	0.001674
Beclin 1	297	304	PVEWNEIN			6	1000.47	Lipids	50	1002.54	0.084352	1.74559	0.084352	10.9809	0.005752
Beclin 1	305	312	AAWGQTVL			7	845.452	Default State	0	845.836	0.013015	0	0	11.4466	0.001767
Beclin 1	305	312	AAWGQTVL			7	845.452	Default State	0.005	845.897	0.057405	0.060175	0.058862	11.4224	0.007836
Beclin 1	305	312	AAWGQTVL			7	845.452	Default State	0.05	845.967	0.009024	0.130188	0.015837	11.4337	0.004502
Beclin 1	305	312	AAWGQTVL			7	845.452	Default State	0.5	845.98	0.018044	0.144101	0.022248	11.4348	0.001739
Beclin 1	305	312	AAWGQTVL			7	845.452	Default State	5	845.964	0.006082	0.12763	0.014366	11.4521	0.005785
Beclin 1	305	312	AAWGQTVL			7	845.452	Default State	50	845.974	0.035297	0.137345	0.03762	11.4604	0.003759
Beclin 1	305	312	AAWGQTVL			7	845.452	Lipids	0	845.836	0.013015	0	0	11.4466	0.001767
Beclin 1	305	312	AAWGQTVL			7	845.452	Lipids	0.005	845.906	0.027598	0.070017	0.030513	11.4326	0.006586
Beclin 1	305	312	AAWGQTVL			7	845.452	Lipids	0.05	845.954	0.019936	0.117689	0.023808	11.4344	0.004817
Beclin 1	305	312	AAWGQTVL			7	845.452	Lipids	0.5	845.967	0.02959	0.130555	0.032325	11.4365	0.00774
Beclin 1	305	312	AAWGQTVL			7	845.452	Lipids	5	845.944	0.030398	0.107771	0.033067	11.4516	0.003567
Beclin 1	305	312	AAWGQTVL			7	845.452	Lipids	50	845.944	0.048281	0.107785	0.050004	11.4668	0.002489
Beclin 1	306	312	AWGQTVL			6	774.414	Default State	0	774.789	0	0	0	11.3085	0
Beclin 1	306	312	AWGQTVL			6	774.414	Default State	0.005	774.853	0.033579	0.064273	0.033579	11.29	0.007103
Beclin 1	306	312	AWGQTVL			6	774.414	Default State	0.05	774.908	0.023855	0.119407	0.023855	11.2947	0.005225
Beclin 1	306	312	AWGQTVL			6	774.414	Default State	0.5	774.878	0.022377	0.089103	0.022377	11.2983	0.001717
Beclin 1	306	312	AWGQTVL			6	774.414	Default State	5	774.875	0.031519	0.086327	0.031519	11.3187	0.0094
Beclin 1	306	312	AWGQTVL			6	774.414	Default State	50	774.875	0.017032	0.086324	0.017032	11.3277	0.00348
Beclin 1	306	312	AWGQTVL			6	774.414	Lipids	0	774.789	0	0	0	11.3085	0
Beclin 1	306	312	AWGQTVL			6	774.414	Lipids	0.005	774.795	0.015979	0.006433	0.015979	11.2987	0.003181
Beclin 1	306	312	AWGQTVL			6	774.414	Lipids	0.05	774.872	0.025578	0.083232	0.025578	11.2972	0.001493
Beclin 1	306	312	AWGQTVL			6	774.414	Lipids	0.5	774.873	0.030949	0.083937	0.030949	11.3032	0.005873
Beclin 1	306	312	AWGQTVL			6	774.414	Lipids	5	774.886	0.026484	0.09768	0.026484	11.3112	0.003937
Beclin 1	306	312	AWGQTVL			6	774.414	Lipids	50	774.864	0.005643	0.075128	0.005643	11.3305	0.00126
Beclin 1	313	323	LLHALANKMGL			10	1180.69	Default State	0	1181.26	0	0	0	9.78667	0
Beclin 1	313	323	LLHALANKMGL			10	1180.69	Default State	0.005	1181.56	0.00843	0.299509	0.00843	9.73331	0.016122
Beclin 1	313	323	LLHALANKMGL			10	1180.69	Default State	0.05	1181.51	0.096362	0.257001	0.096362	9.75858	0.005247
Beclin 1	313	323	LLHALANKMGL			10	1180.69	Default State	0.5	1181.52	0.095334	0.260034	0.095334	9.7787	0.015142
Beclin 1	313	323	LLHALANKMGL			10	1180.69	Default State	5	1181.73	0.034452	0.472122	0.034452	9.83738	0.012437
Beclin 1	313	323	LLHALANKMGL			10	1180.69	Default State	50	1181.86	0.032302	0.59858	0.032302	9.89956	0.019693
Beclin 1	313	323	LLHALANKMGL			10	1180.69	Lipids	0	1181.26	0	0	0	9.78667	0
Beclin 1	313	323	LLHALANKMGL			10	1180.69	Lipids	0.005	1181.48	0.018598	0.226656	0.018598	9.76029	0.006718
Beclin 1	313	323	LLHALANKMGL			10	1180.69	Lipids	0.05	1181.58	0.058212	0.323409	0.058212	9.77016	0.006547
Beclin 1	313	323	LLHALANKMGL			10	1180.69	Lipids	0.5	1181.47	0.034634	0.215654	0.034634	9.79155	0.01177
Beclin 1	313	323	LLHALANKMGL			10	1180.69	Lipids	5	1181.59	0.042675	0.330634	0.042675	9.83803	0.015822
Beclin 1	313	323	LLHALANKMGL			10	1180.69	Lipids	50	1181.78	0.056344	0.520003	0.056344	9.92432	0.021282
Beclin 1	313	325	LLHALANKMGLKF			12	1455.85	Default State	0	1456.62	0.104718	0	0	10.2569	0.001992
Beclin 1	313	325	LLHALANKMGLKF			12	1455.85	Default State	0.005	1457.18	0.03053	0.553434	0.109078	10.2035	0.023821
Beclin 1	313	325	LLHALANKMGLKF			12	1455.85	Default State	0.05	1457.8	0.050589	1.17695	0.116298	10.2338	0.006648
Beclin 1	313	325	LLHALANKMGLKF			12	1455.85	Default State	0.5	1458.01	0.107179	1.38643	0.149844	10.2548	0.008591
Beclin 1	313	325	LLHALANKMGLKF			12	1455.85	Default State	5	1458.22	0.088998	1.59218	0.137428	10.3503	0.026753
Beclin 1	313	325	LLHALANKMGLKF			12	1455.85	Default State	50	1458.45	0.158102	1.82457	0.189637	10.5027	0.058901
Beclin 1	313	325	LLHALANKMGLKF			12	1455.85	Lipids	0	1456.62	0.104718	0	0	10.2569	0.001992
Beclin 1	313	325	LLHALANKMGLKF			12	1455.85	Lipids	0.005	1457.16	0.047388	0.532874	0.114941	10.2299	0.007294
Beclin 1	313	325	LLHALANKMGLKF			12	1455.85	Lipids	0.05	1457.88	0.224388	1.25049	0.24762	10.2463	0.012651
Beclin 1	313	325	LLHALANKMGLKF			12	1455.85	Lipids	0.5	1458.18	0.057276	1.55666	0.119358	10.2644	0.027377
Beclin 1	313	325	LLHALANKMGLKF			12	1455.85	Lipids	5	1458.11	0.049688	1.48485	0.115908	10.3615	0.00796
Beclin 1	313	325	LLHALANKMGLKF			12	1455.85	Lipids	50	1458.67	0	2.04301	0.104718	10.5616	0
Beclin 1	326	339	QRYRLVPYGNHSYL			12	1765.91	Default State	0	1766.98	0	0	0	9.31393	0
Beclin 1	326	339	QRYRLVPYGNHSYL			12	1765.91	Default State	0.005	1767.14	0.016025	0.163731	0.016025	9.26805	0.015059
Beclin 1	326	339	QRYRLVPYGNHSYL			12	1765.91	Default State	0.05	1767.25	0.009871	0.270023	0.009871	9.28227	0.00441
Beclin 1	326	339	QRYRLVPYGNHSYL			12	1765.91	Default State	0.5	1767.36	0.03633	0.379799	0.03633	9.30108	0.01053
Beclin 1	326	339	QRYRLVPYGNHSYL			12	1765.91	Default State	5	1767.94	0.182904	0.95906	0.182904	9.33929	0.011163
Beclin 1	326	339	QRYRLVPYGNHSYL			12	1765.91	Default State	50	1768.44	0.069488	1.46539	0.069488	9.38355	0.009087
Beclin 1	326	339	QRYRLVPYGNHSYL			12	1765.91	Lipids	0	1766.98	0	0	0	9.31393	0
Beclin 1	326	339	QRYRLVPYGNHSYL			12	1765.91	Lipids	0.005	1767.17	2.17767e-05	0.194158	2.17767e-05	9.29419	0.004895
Beclin 1	326	339	QRYRLVPYGNHSYL			12	1765.91	Lipids	0.05	1767.21	0.02315	0.231205	0.02315	9.28825	0.017221
Beclin 1	326	339	QRYRLVPYGNHSYL			12	1765.91	Lipids	0.5	1767.38	0.024631	0.40011	0.024631	9.31818	0.012192
Beclin 1	326	339	QRYRLVPYGNHSYL			12	1765.91	Lipids	5	1767.87	0.079809	0.890118	0.079809	9.34832	0.011893
Beclin 1	326	339	QRYRLVPYGNHSYL			12	1765.91	Lipids	50	1768.17	0.097053	1.18869	0.097053	9.41036	0.019705
Beclin 1	328	342	YRLVPYGNHSYLESL			13	1810.91	Default State	0	1811.9	0	0	0	7.01458	0
Beclin 1	328	342	YRLVPYGNHSYLESL			13	1810.91	Default State	0.005	1812.59	0.006606	0.694934	0.006606	6.98243	0.00923
Beclin 1	328	342	YRLVPYGNHSYLESL			13	1810.91	Default State	0.05	1812.68	0.03624	0.777936	0.03624	6.99201	0.000757
Beclin 1	328	342	YRLVPYGNHSYLESL			13	1810.91	Default State	0.5	1812.83	0.089017	0.926827	0.089017	6.99725	0.004317
Beclin 1	328	342	YRLVPYGNHSYLESL			13	1810.91	Default State	5	1813.9	0.055504	1.99796	0.055504	7.01135	0.007649
Beclin 1	328	342	YRLVPYGNHSYLESL			13	1810.91	Default State	50	1815.95	0.110144	4.04989	0.110144	7.01528	0.002308
Beclin 1	328	342	YRLVPYGNHSYLESL			13	1810.91	Lipids	0	1811.9	0	0	0	7.01458	0
Beclin 1	328	342	YRLVPYGNHSYLESL			13	1810.91	Lipids	0.005	1812.55	0.016083	0.654704	0.016083	7.01211	0.021012
Beclin 1	328	342	YRLVPYGNHSYLESL			13	1810.91	Lipids	0.05	1812.67	0.111189	0.773355	0.111189	7.00741	0.002768
Beclin 1	328	342	YRLVPYGNHSYLESL			13	1810.91	Lipids	0.5	1812.85	0.136742	0.954913	0.136742	7.00886	0.006981
Beclin 1	328	342	YRLVPYGNHSYLESL			13	1810.91	Lipids	5	1813.89	0.070764	1.99237	0.070764	7.0223	0.007883
Beclin 1	328	342	YRLVPYGNHSYLESL			13	1810.91	Lipids	50	1815.8	0.01368	3.89842	0.01368	7.02304	0.002433
Beclin 1	340	359	ESLTDKSKELPLYCSGGLRF			18	2243.14	Default State	0	2244.3	0.071445	0	0	11.3071	0.001722
Beclin 1	340	359	ESLTDKSKELPLYCSGGLRF			18	2243.14	Default State	0.005	2249.26	0.121687	4.95643	0.14111	11.283	0.011584
Beclin 1	340	359	ESLTDKSKELPLYCSGGLRF			18	2243.14	Default State	0.05	2249.73	0.083102	5.42268	0.109592	11.298	0.002734
Beclin 1	340	359	ESLTDKSKELPLYCSGGLRF			18	2243.14	Default State	0.5	2250.28	0.103914	5.97199	0.126105	11.3021	0.006179
Beclin 1	340	359	ESLTDKSKELPLYCSGGLRF			18	2243.14	Default State	5	2250.79	0.067544	6.48225	0.098319	11.3307	0.010147
Beclin 1	340	359	ESLTDKSKELPLYCSGGLRF			18	2243.14	Default State	50	2251.13	0.130882	6.82148	0.149112	11.3669	0.016338
Beclin 1	340	359	ESLTDKSKELPLYCSGGLRF			18	2243.14	Lipids	0	2244.3	0.071445	0	0	11.3071	0.001722
Beclin 1	340	359	ESLTDKSKELPLYCSGGLRF			18	2243.14	Lipids	0.005	2249.16	0.167953	4.85346	0.182517	11.2912	0.004048
Beclin 1	340	359	ESLTDKSKELPLYCSGGLRF			18	2243.14	Lipids	0.05	2249.44	0.145249	5.13683	0.161869	11.3155	0.011992
Beclin 1	340	359	ESLTDKSKELPLYCSGGLRF			18	2243.14	Lipids	0.5	2249.79	0.055738	5.4833	0.090615	11.3224	0.01397
Beclin 1	340	359	ESLTDKSKELPLYCSGGLRF			18	2243.14	Lipids	5	2250.27	0.090668	5.96069	0.115434	11.3372	0.010085
Beclin 1	340	359	ESLTDKSKELPLYCSGGLRF			18	2243.14	Lipids	50	2250.45	0.242094	6.14434	0.252416	11.3648	0.018173
Beclin 1	342	359	LTDKSKELPLYCSGGLRF			16	2027.06	Default State	0	2028.3	0	0	0	11.0544	0
Beclin 1	342	359	LTDKSKELPLYCSGGLRF			16	2027.06	Default State	0.005	2032.03	0.129172	3.72941	0.129172	11.0283	0.006079
Beclin 1	342	359	LTDKSKELPLYCSGGLRF			16	2027.06	Default State	0.05	2032.5	0.131424	4.19655	0.131424	11.042	0.004153
Beclin 1	342	359	LTDKSKELPLYCSGGLRF			16	2027.06	Default State	0.5	2033.05	0.193856	4.74738	0.193856	11.0493	0.00342
Beclin 1	342	359	LTDKSKELPLYCSGGLRF			16	2027.06	Default State	5	2033.44	0.021172	5.13353	0.021172	11.0773	0.014068
Beclin 1	342	359	LTDKSKELPLYCSGGLRF			16	2027.06	Default State	50	2033.5	0.138205	5.19511	0.138205	11.1154	0.00812
Beclin 1	342	359	LTDKSKELPLYCSGGLRF			16	2027.06	Lipids	0	2028.3	0	0	0	11.0544	0
Beclin 1	342	359	LTDKSKELPLYCSGGLRF			16	2027.06	Lipids	0.005	2031.91	0.292171	3.6044	0.292171	11.0419	0.000478
Beclin 1	342	359	LTDKSKELPLYCSGGLRF			16	2027.06	Lipids	0.05	2032.41	0.08512	4.10994	0.08512	11.0406	0.00604
Beclin 1	342	359	LTDKSKELPLYCSGGLRF			16	2027.06	Lipids	0.5	2032.57	0.188947	4.26728	0.188947	11.0474	0.002798
Beclin 1	342	359	LTDKSKELPLYCSGGLRF			16	2027.06	Lipids	5	2032.86	0.07118	4.55683	0.07118	11.0732	0.00725
Beclin 1	342	359	LTDKSKELPLYCSGGLRF			16	2027.06	Lipids	50	2033.15	0.355445	4.84319	0.355445	11.1287	0.006844
Beclin 1	343	359	TDKSKELPLYCSGGLRF			15	1913.98	Default State	0	1915.03	0	0	0	11.0232	0
Beclin 1	343	359	TDKSKELPLYCSGGLRF			15	1913.98	Default State	0.005	1918.75	0.154151	3.72115	0.154151	10.9964	0.005973
Beclin 1	343	359	TDKSKELPLYCSGGLRF			15	1913.98	Default State	0.05	1919.1	0.136155	4.07175	0.136155	11.0061	0.004983
Beclin 1	343	359	TDKSKELPLYCSGGLRF			15	1913.98	Default State	0.5	1919.59	0.130042	4.56003	0.130042	11.0136	0.008031
Beclin 1	343	359	TDKSKELPLYCSGGLRF			15	1913.98	Default State	5	1919.94	0.043556	4.91173	0.043556	11.0404	0.012404
Beclin 1	343	359	TDKSKELPLYCSGGLRF			15	1913.98	Default State	50	1920	0.075739	4.96401	0.075739	11.0748	0.008242
Beclin 1	343	359	TDKSKELPLYCSGGLRF			15	1913.98	Lipids	0	1915.03	0	0	0	11.0232	0
Beclin 1	343	359	TDKSKELPLYCSGGLRF			15	1913.98	Lipids	0.005	1918.56	0.113641	3.52606	0.113641	11.0089	0.002473
Beclin 1	343	359	TDKSKELPLYCSGGLRF			15	1913.98	Lipids	0.05	1918.95	0.195083	3.92201	0.195083	11.005	0.003411
Beclin 1	343	359	TDKSKELPLYCSGGLRF			15	1913.98	Lipids	0.5	1919.14	0.084773	4.11248	0.084773	11.0182	0.009552
Beclin 1	343	359	TDKSKELPLYCSGGLRF			15	1913.98	Lipids	5	1919.2	0.094129	4.1676	0.094129	11.0421	0.006995
Beclin 1	343	359	TDKSKELPLYCSGGLRF			15	1913.98	Lipids	50	1919.37	0.291076	4.34081	0.291076	11.0879	0.00957
Beclin 1	360	369	FWDNKFDHAM			9	1310.56	Default State	0	1311.37	0	0	0	10.2639	0
Beclin 1	360	369	FWDNKFDHAM			9	1310.56	Default State	0.005	1311.89	0.02165	0.523732	0.02165	10.215	0.014033
Beclin 1	360	369	FWDNKFDHAM			9	1310.56	Default State	0.05	1311.99	0.009015	0.624367	0.009015	10.2372	0.002931
Beclin 1	360	369	FWDNKFDHAM			9	1310.56	Default State	0.5	1312.07	0.03879	0.696648	0.03879	10.2499	0.011892
Beclin 1	360	369	FWDNKFDHAM			9	1310.56	Default State	5	1312.49	0.012681	1.11811	0.012681	10.2806	0.010576
Beclin 1	360	369	FWDNKFDHAM			9	1310.56	Default State	50	1312.61	0.028346	1.24244	0.028346	10.3228	0.00402
Beclin 1	360	369	FWDNKFDHAM			9	1310.56	Lipids	0	1311.37	0	0	0	10.2639	0
Beclin 1	360	369	FWDNKFDHAM			9	1310.56	Lipids	0.005	1311.84	0.110318	0.472161	0.110318	10.2423	0.012516
Beclin 1	360	369	FWDNKFDHAM			9	1310.56	Lipids	0.05	1311.89	0.051252	0.516947	0.051252	10.2442	0.008303
Beclin 1	360	369	FWDNKFDHAM			9	1310.56	Lipids	0.5	1312.12	0.059068	0.750657	0.059068	10.2584	0.010833
Beclin 1	360	369	FWDNKFDHAM			9	1310.56	Lipids	5	1312.4	0.035418	1.02643	0.035418	10.2912	0.008385
Beclin 1	360	369	FWDNKFDHAM			9	1310.56	Lipids	50	1312.56	0.124345	1.1941	0.124345	10.3301	0.013228
Beclin 1	377	389	QQFKEEVEKGETR			12	1607.8	Default State	0	1608.72	0	0	0	11.3	0
Beclin 1	377	389	QQFKEEVEKGETR			12	1607.8	Default State	0.005	1611.95	0.074065	3.22886	0.074065	11.2762	0.008121
Beclin 1	377	389	QQFKEEVEKGETR			12	1607.8	Default State	0.05	1612.18	0.128377	3.46292	0.128377	11.2889	0.002436
Beclin 1	377	389	QQFKEEVEKGETR			12	1607.8	Default State	0.5	1612.54	0.315295	3.82119	0.315295	11.2949	0.005451
Beclin 1	377	389	QQFKEEVEKGETR			12	1607.8	Default State	5	1613.37	0.085365	4.6513	0.085365	11.3328	0.007256
Beclin 1	377	389	QQFKEEVEKGETR			12	1607.8	Default State	50	1613.63	0.116879	4.90784	0.116879	11.363	0.010148
Beclin 1	377	389	QQFKEEVEKGETR			12	1607.8	Lipids	0	1608.72	0	0	0	11.3	0
Beclin 1	377	389	QQFKEEVEKGETR			12	1607.8	Lipids	0.005	1611.57	0.037545	2.8535	0.037545	11.2899	0.000256
Beclin 1	377	389	QQFKEEVEKGETR			12	1607.8	Lipids	0.05	1612.22	0.102596	3.50127	0.102596	11.2942	0.003165
Beclin 1	377	389	QQFKEEVEKGETR			12	1607.8	Lipids	0.5	1612.61	0.312811	3.89133	0.312811	11.2996	0.008235
Beclin 1	377	389	QQFKEEVEKGETR			12	1607.8	Lipids	5	1612.6	0.157368	3.88017	0.157368	11.335	0.009989
Beclin 1	377	389	QQFKEEVEKGETR			12	1607.8	Lipids	50	1613.41	0.242088	4.68938	0.242088	11.3823	0.020674
Beclin 1	379	390	FKEEVEKGETRF			11	1498.75	Default State	0	1499.53	0	0	0	7.34754	0
Beclin 1	379	390	FKEEVEKGETRF			11	1498.75	Default State	0.005	1501.41	0.068671	1.8828	0.068671	7.29759	0.015617
Beclin 1	379	390	FKEEVEKGETRF			11	1498.75	Default State	0.05	1501.64	0.077803	2.10811	0.077803	7.31727	0.002362
Beclin 1	379	390	FKEEVEKGETRF			11	1498.75	Default State	0.5	1501.79	0.033705	2.26192	0.033705	7.32358	0.007761
Beclin 1	379	390	FKEEVEKGETRF			11	1498.75	Default State	5	1502.22	0.046681	2.68508	0.046681	7.33749	0.006119
Beclin 1	379	390	FKEEVEKGETRF			11	1498.75	Default State	50	1502.35	0.03095	2.82324	0.03095	7.35951	0.002861
Beclin 1	379	390	FKEEVEKGETRF			11	1498.75	Lipids	0	1499.53	0	0	0	7.34754	0
Beclin 1	379	390	FKEEVEKGETRF			11	1498.75	Lipids	0.005	1501.44	0.117768	1.90949	0.117768	7.32816	0.004698
Beclin 1	379	390	FKEEVEKGETRF			11	1498.75	Lipids	0.05	1501.53	0.091373	1.9949	0.091373	7.33567	0.002553
Beclin 1	379	390	FKEEVEKGETRF			11	1498.75	Lipids	0.5	1501.57	0.126093	2.03757	0.126093	7.34081	0.008692
Beclin 1	379	390	FKEEVEKGETRF			11	1498.75	Lipids	5	1501.96	0.089923	2.42896	0.089923	7.35378	0.004394
Beclin 1	379	390	FKEEVEKGETRF			11	1498.75	Lipids	50	1502.16	0.059638	2.63159	0.059638	7.37037	0.0025
Beclin 1	381	391	EEVEKGETRFC			10	1326.6	Default State	0	1327.33	0	0	0	6.32095	0
Beclin 1	381	391	EEVEKGETRFC			10	1326.6	Default State	0.005	1327.64	0.044161	0.312535	0.044161	6.2988	0.008871
Beclin 1	381	391	EEVEKGETRFC			10	1326.6	Default State	0.05	1327.88	0.015226	0.555427	0.015226	6.30824	0.003641
Beclin 1	381	391	EEVEKGETRFC			10	1326.6	Default State	0.5	1328.2	0.108441	0.87149	0.108441	6.31629	0.004111
Beclin 1	381	391	EEVEKGETRFC			10	1326.6	Default State	5	1328.74	0.074173	1.41055	0.074173	6.32479	0.005158
Beclin 1	381	391	EEVEKGETRFC			10	1326.6	Default State	50	1329.46	0.041013	2.13268	0.041013	6.34539	0.003322
Beclin 1	381	391	EEVEKGETRFC			10	1326.6	Lipids	0	1327.33	0	0	0	6.32095	0
Beclin 1	381	391	EEVEKGETRFC			10	1326.6	Lipids	0.005	1327.65	0.044833	0.325006	0.044833	6.31109	0.006054
Beclin 1	381	391	EEVEKGETRFC			10	1326.6	Lipids	0.05	1327.93	0.070358	0.600943	0.070358	6.32245	0.00137
Beclin 1	381	391	EEVEKGETRFC			10	1326.6	Lipids	0.5	1328.21	0.071697	0.884091	0.071697	6.32462	0.007933
Beclin 1	381	391	EEVEKGETRFC			10	1326.6	Lipids	5	1328.91	0.02409	1.57924	0.02409	6.33585	0.00701
Beclin 1	381	391	EEVEKGETRFC			10	1326.6	Lipids	50	1329.59	0.07873	2.26172	0.07873	6.35422	0.001348
Beclin 1	395	417	RMDVEKGKIEDTGGSGGSYSIKT			22	2415.18	Default State	0	2416.48	0	0	0	6.15417	0
Beclin 1	395	417	RMDVEKGKIEDTGGSGGSYSIKT			22	2415.18	Default State	0.005	2417	0.063026	0.52161	0.063026	6.14232	0.008268
Beclin 1	395	417	RMDVEKGKIEDTGGSGGSYSIKT			22	2415.18	Default State	0.05	2417.29	0.048168	0.810342	0.048168	6.14478	0.000959
Beclin 1	395	417	RMDVEKGKIEDTGGSGGSYSIKT			22	2415.18	Default State	0.5	2417.54	0.019747	1.0597	0.019747	6.15521	0.004468
Beclin 1	395	417	RMDVEKGKIEDTGGSGGSYSIKT			22	2415.18	Default State	5	2418.08	0.056284	1.59908	0.056284	6.16024	0.003093
Beclin 1	395	417	RMDVEKGKIEDTGGSGGSYSIKT			22	2415.18	Default State	50	2418.21	0.043791	1.73542	0.043791	6.17229	0.002877
Beclin 1	395	417	RMDVEKGKIEDTGGSGGSYSIKT			22	2415.18	Lipids	0	2416.48	0	0	0	6.15417	0
Beclin 1	395	417	RMDVEKGKIEDTGGSGGSYSIKT			22	2415.18	Lipids	0.005	2417.03	0.02702	0.557993	0.02702	6.15042	0.009521
Beclin 1	395	417	RMDVEKGKIEDTGGSGGSYSIKT			22	2415.18	Lipids	0.05	2417.27	0.047841	0.790305	0.047841	6.15818	0.004052
Beclin 1	395	417	RMDVEKGKIEDTGGSGGSYSIKT			22	2415.18	Lipids	0.5	2417.81	0.067717	1.33143	0.067717	6.16124	0.005775
Beclin 1	395	417	RMDVEKGKIEDTGGSGGSYSIKT			22	2415.18	Lipids	5	2418.05	0.043113	1.57163	0.043113	6.16991	0.001337
Beclin 1	395	417	RMDVEKGKIEDTGGSGGSYSIKT			22	2415.18	Lipids	50	2418.27	0.063908	1.79774	0.063908	6.18267	0.001092
Beclin 1	397	412	DVEKGKIEDTGGSGGS			15	1535.72	Default State	0	1536.4	0.075994	0	0	5.51419	0.001577
Beclin 1	397	412	DVEKGKIEDTGGSGGS			15	1535.72	Default State	0.005	1539.33	0.050981	2.92402	0.09151	5.50155	0.007112
Beclin 1	397	412	DVEKGKIEDTGGSGGS			15	1535.72	Default State	0.05	1539.9	0.122653	3.49595	0.144287	5.50463	0.002363
Beclin 1	397	412	DVEKGKIEDTGGSGGS			15	1535.72	Default State	0.5	1540.14	0.151478	3.73303	0.169472	5.50659	0.002415
Beclin 1	397	412	DVEKGKIEDTGGSGGS			15	1535.72	Default State	5	1540.64	0.180018	4.23348	0.195401	5.5095	0.003482
Beclin 1	397	412	DVEKGKIEDTGGSGGS			15	1535.72	Default State	50	1540.81	0.127627	4.40748	0.148539	5.51119	0.002465
Beclin 1	397	412	DVEKGKIEDTGGSGGS			15	1535.72	Lipids	0	1536.4	0.075994	0	0	5.51419	0.001577
Beclin 1	397	412	DVEKGKIEDTGGSGGS			15	1535.72	Lipids	0.005	1539.05	0.008281	2.6497	0.076444	5.51961	0.003821
Beclin 1	397	412	DVEKGKIEDTGGSGGS			15	1535.72	Lipids	0.05	1539.56	0.203335	3.15177	0.217072	5.51303	0.004955
Beclin 1	397	412	DVEKGKIEDTGGSGGS			15	1535.72	Lipids	0.5	1539.54	0.187088	3.13562	0.201933	5.50378	0.002004
Beclin 1	397	412	DVEKGKIEDTGGSGGS			15	1535.72	Lipids	5	1539.88	0.121256	3.47524	0.143101	5.51177	0.00287
Beclin 1	397	412	DVEKGKIEDTGGSGGS			15	1535.72	Lipids	50	1540.15	0.284282	3.74834	0.294264	5.51232	0.00331
Beclin 1	400	418	KGKIEDTGGSGGSYSIKTQ			18	1912.96	Default State	0	1914.17	0.076628	0	0	13.2798	0.001112
Beclin 1	400	418	KGKIEDTGGSGGSYSIKTQ			18	1912.96	Default State	0.005	1914.98	0.122671	0.801679	0.144637	13.276	0.002291
Beclin 1	400	418	KGKIEDTGGSGGSYSIKTQ			18	1912.96	Default State	0.05	1915.16	0.108817	0.990371	0.13309	13.2814	0.004492
Beclin 1	400	418	KGKIEDTGGSGGSYSIKTQ			18	1912.96	Default State	0.5	1915.13	0.486159	0.955593	0.492161	13.2825	0.002273
Beclin 1	400	418	KGKIEDTGGSGGSYSIKTQ			18	1912.96	Default State	5	1915.68	0.509103	1.50759	0.514838	13.2957	0.007669
Beclin 1	400	418	KGKIEDTGGSGGSYSIKTQ			18	1912.96	Default State	50	1916.89	0.252876	2.71284	0.264232	13.302	0.003073
Beclin 1	400	418	KGKIEDTGGSGGSYSIKTQ			18	1912.96	Lipids	0	1914.17	0.076628	0	0	13.2798	0.001112
Beclin 1	400	418	KGKIEDTGGSGGSYSIKTQ			18	1912.96	Lipids	0.005	1914.83	0.046334	0.655512	0.089547	13.2726	0.006681
Beclin 1	400	418	KGKIEDTGGSGGSYSIKTQ			18	1912.96	Lipids	0.05	1915.39	0.252329	1.22	0.263707	13.2835	0.00853
Beclin 1	400	418	KGKIEDTGGSGGSYSIKTQ			18	1912.96	Lipids	0.5	1915.31	0.361922	1.13154	0.369945	13.2847	0.005479
Beclin 1	400	418	KGKIEDTGGSGGSYSIKTQ			18	1912.96	Lipids	5	1915.99	0.249538	1.81195	0.261038	13.2813	0.008215
Beclin 1	400	418	KGKIEDTGGSGGSYSIKTQ			18	1912.96	Lipids	50	1916.76	0.395194	2.58507	0.402554	13.3016	0.00717
Beclin 1	406	420	TGGSGGSYSIKTQFN			14	1503.71	Default State	0	1504.62	0.050774	0	0	12.2858	0.001163
Beclin 1	406	420	TGGSGGSYSIKTQFN			14	1503.71	Default State	0.005	1507.46	0.17205	2.84348	0.179386	12.2588	0.004963
Beclin 1	406	420	TGGSGGSYSIKTQFN			14	1503.71	Default State	0.05	1508.51	0.142141	3.89381	0.150938	12.2592	0.00562
Beclin 1	406	420	TGGSGGSYSIKTQFN			14	1503.71	Default State	0.5	1508.81	0.104991	4.18966	0.116624	12.2584	0.003979
Beclin 1	406	420	TGGSGGSYSIKTQFN			14	1503.71	Default State	5	1509	0.18139	4.38236	0.188362	12.2705	0.010757
Beclin 1	406	420	TGGSGGSYSIKTQFN			14	1503.71	Default State	50	1509.42	0.127164	4.79687	0.136926	12.2777	0.001763
Beclin 1	406	420	TGGSGGSYSIKTQFN			14	1503.71	Lipids	0	1504.62	0.050774	0	0	12.2858	0.001163
Beclin 1	406	420	TGGSGGSYSIKTQFN			14	1503.71	Lipids	0.005	1507.46	0.169054	2.83488	0.176514	12.2543	0.006753
Beclin 1	406	420	TGGSGGSYSIKTQFN			14	1503.71	Lipids	0.05	1508.49	0.165417	3.87217	0.173034	12.2546	0.003218
Beclin 1	406	420	TGGSGGSYSIKTQFN			14	1503.71	Lipids	0.5	1508.77	0.10987	4.14989	0.121035	12.2562	0.002352
Beclin 1	406	420	TGGSGGSYSIKTQFN			14	1503.71	Lipids	5	1509.05	0.168791	4.43007	0.176262	12.264	0.006748
Beclin 1	406	420	TGGSGGSYSIKTQFN			14	1503.71	Lipids	50	1509.54	0.094921	4.92353	0.107648	12.2787	0.003
Beclin 1	410	424	GGSYSIKTQFNSEEQ			14	1674.76	Default State	0	1675.57	0	0	0	7.03608	0
Beclin 1	410	424	GGSYSIKTQFNSEEQ			14	1674.76	Default State	0.005	1677.14	0.037749	1.57088	0.037749	7.02019	0.000183
Beclin 1	410	424	GGSYSIKTQFNSEEQ			14	1674.76	Default State	0.05	1677.54	0.169406	1.96805	0.169406	7.01943	0.001137
Beclin 1	410	424	GGSYSIKTQFNSEEQ			14	1674.76	Default State	0.5	1677.82	0.113399	2.24977	0.113399	7.02474	0.005756
Beclin 1	410	424	GGSYSIKTQFNSEEQ			14	1674.76	Default State	5	1678.82	0.132556	3.25297	0.132556	7.03318	0.00423
Beclin 1	410	424	GGSYSIKTQFNSEEQ			14	1674.76	Default State	50	1679.1	0.128318	3.53445	0.128318	7.0494	0.001726
Beclin 1	410	424	GGSYSIKTQFNSEEQ			14	1674.76	Lipids	0	1675.57	0	0	0	7.03608	0
Beclin 1	410	424	GGSYSIKTQFNSEEQ			14	1674.76	Lipids	0.005	1677.29	0.070287	1.72537	0.070287	7.02192	0.003161
Beclin 1	410	424	GGSYSIKTQFNSEEQ			14	1674.76	Lipids	0.05	1677.54	0.141713	1.97435	0.141713	7.03273	0.003388
Beclin 1	410	424	GGSYSIKTQFNSEEQ			14	1674.76	Lipids	0.5	1677.69	0.085253	2.12555	0.085253	7.02724	0.006175
Beclin 1	410	424	GGSYSIKTQFNSEEQ			14	1674.76	Lipids	5	1678.73	0.169251	3.16162	0.169251	7.04269	0.003814
Beclin 1	410	424	GGSYSIKTQFNSEEQ			14	1674.76	Lipids	50	1679.48	0.029459	3.90901	0.029459	7.05726	0.008126
Beclin 1	420	431	NSEEQWTKALKF			11	1480.74	Default State	0	1481.5	0	0	0	11.0641	0
Beclin 1	420	431	NSEEQWTKALKF			11	1480.74	Default State	0.005	1481.75	0.031449	0.249556	0.031449	11.0437	0.000401
Beclin 1	420	431	NSEEQWTKALKF			11	1480.74	Default State	0.05	1481.97	0.031502	0.460288	0.031502	11.0505	0.00428
Beclin 1	420	431	NSEEQWTKALKF			11	1480.74	Default State	0.5	1482.1	0.101039	0.596387	0.101039	11.0523	0.007701
Beclin 1	420	431	NSEEQWTKALKF			11	1480.74	Default State	5	1482.44	0.061307	0.932967	0.061307	11.0842	0.011962
Beclin 1	420	431	NSEEQWTKALKF			11	1480.74	Default State	50	1482.4	0.016345	0.891217	0.016345	11.1053	0.008199
Beclin 1	420	431	NSEEQWTKALKF			11	1480.74	Lipids	0	1481.5	0	0	0	11.0641	0
Beclin 1	420	431	NSEEQWTKALKF			11	1480.74	Lipids	0.005	1481.87	0.047888	0.363411	0.047888	11.0748	0.027983
Beclin 1	420	431	NSEEQWTKALKF			11	1480.74	Lipids	0.05	1481.98	0.019541	0.479695	0.019541	11.0508	0.00263
Beclin 1	420	431	NSEEQWTKALKF			11	1480.74	Lipids	0.5	1482.12	0.019644	0.612932	0.019644	11.0621	0.007508
Beclin 1	420	431	NSEEQWTKALKF			11	1480.74	Lipids	5	1482.25	0.09109	0.74771	0.09109	11.0814	0.008109
Beclin 1	420	431	NSEEQWTKALKF			11	1480.74	Lipids	50	1482.26	0.070282	0.754699	0.070282	11.1211	0.006649
Beclin 1	429	446	LKFMLTNLKWGLAWVSSQ			17	2122.15	Default State	0	2123.27	0.008318	0	0	9.76985	0.004198
Beclin 1	429	446	LKFMLTNLKWGLAWVSSQ			17	2122.15	Default State	0.005	2124.5	0.178113	1.22744	0.178307	9.74719	0.018205
Beclin 1	429	446	LKFMLTNLKWGLAWVSSQ			17	2122.15	Default State	0.05	2125.62	0.193184	2.35057	0.193363	9.75067	0.005253
Beclin 1	429	446	LKFMLTNLKWGLAWVSSQ			17	2122.15	Default State	0.5	2126.29	0.209658	3.02239	0.209823	9.76485	0.01191
Beclin 1	429	446	LKFMLTNLKWGLAWVSSQ			17	2122.15	Default State	5	2127.72	0.044407	4.45272	0.045179	9.79356	0.011335
Beclin 1	429	446	LKFMLTNLKWGLAWVSSQ			17	2122.15	Default State	50	2129.04	0.237099	5.76405	0.237245	9.8361	0.013716
Beclin 1	429	446	LKFMLTNLKWGLAWVSSQ			17	2122.15	Lipids	0	2123.27	0.008318	0	0	9.76985	0.004198
Beclin 1	429	446	LKFMLTNLKWGLAWVSSQ			17	2122.15	Lipids	0.005	2124.46	0.089227	1.19223	0.089614	9.75507	0.005904
Beclin 1	429	446	LKFMLTNLKWGLAWVSSQ			17	2122.15	Lipids	0.05	2125.62	0.056382	2.35085	0.056993	9.75413	0.004419
Beclin 1	429	446	LKFMLTNLKWGLAWVSSQ			17	2122.15	Lipids	0.5	2126.49	0.091185	3.2209	0.091564	9.77145	0.008928
Beclin 1	429	446	LKFMLTNLKWGLAWVSSQ			17	2122.15	Lipids	5	2127.91	0.043822	4.64093	0.044604	9.8036	0.011392
Beclin 1	429	446	LKFMLTNLKWGLAWVSSQ			17	2122.15	Lipids	50	2129.31	0.284716	6.03395	0.284837	9.8617	0.024265
Beclin 1	432	441	MLTNLKWGLA			9	1146.63	Default State	0	1147.34	0	0	0	11.8682	0
Beclin 1	432	441	MLTNLKWGLA			9	1146.63	Default State	0.005	1147.46	0.068051	0.123752	0.068051	11.844	0.00671
Beclin 1	432	441	MLTNLKWGLA			9	1146.63	Default State	0.05	1147.4	0.052733	0.064134	0.052733	11.8539	0.004525
Beclin 1	432	441	MLTNLKWGLA			9	1146.63	Default State	0.5	1147.46	0.052618	0.124663	0.052618	11.8588	0.002824
Beclin 1	432	441	MLTNLKWGLA			9	1146.63	Default State	5	1147.72	0.019537	0.377272	0.019537	11.887	0.012807
Beclin 1	432	441	MLTNLKWGLA			9	1146.63	Default State	50	1147.86	0.015134	0.523755	0.015134	11.9081	0.008115
Beclin 1	432	441	MLTNLKWGLA			9	1146.63	Lipids	0	1147.34	0	0	0	11.8682	0
Beclin 1	432	441	MLTNLKWGLA			9	1146.63	Lipids	0.005	1147.33	0.067073	-0.01198	0.067073	11.847	0.004065
Beclin 1	432	441	MLTNLKWGLA			9	1146.63	Lipids	0.05	1147.4	0.052754	0.061027	0.052754	11.8602	0.004224
Beclin 1	432	441	MLTNLKWGLA			9	1146.63	Lipids	0.5	1147.54	0.029968	0.20039	0.029968	11.8637	0.007111
Beclin 1	432	441	MLTNLKWGLA			9	1146.63	Lipids	5	1147.75	0.019001	0.415173	0.019001	11.8904	0.010283
Beclin 1	432	441	MLTNLKWGLA			9	1146.63	Lipids	50	1147.83	0.024386	0.491929	0.024386	11.9134	0.007875
Beclin 1	435	446	NLKWGLAWVSSQ			11	1388.73	Default State	0	1389.39	0	0	0	6.56656	0
Beclin 1	435	446	NLKWGLAWVSSQ			11	1388.73	Default State	0.005	1390.51	0.052632	1.11556	0.052632	6.53191	0.018085
Beclin 1	435	446	NLKWGLAWVSSQ			11	1388.73	Default State	0.05	1391.12	0.036822	1.72921	0.036822	6.54439	0.003797
Beclin 1	435	446	NLKWGLAWVSSQ			11	1388.73	Default State	0.5	1391.58	0.080601	2.18395	0.080601	6.55351	0.003492
Beclin 1	435	446	NLKWGLAWVSSQ			11	1388.73	Default State	5	1391.97	0.091553	2.57462	0.091553	6.56523	0.010337
Beclin 1	435	446	NLKWGLAWVSSQ			11	1388.73	Default State	50	1392.76	0.092159	3.37162	0.092159	6.58707	0.001847
Beclin 1	435	446	NLKWGLAWVSSQ			11	1388.73	Lipids	0	1389.39	0	0	0	6.56656	0
Beclin 1	435	446	NLKWGLAWVSSQ			11	1388.73	Lipids	0.005	1390.49	0.094684	1.09986	0.094684	6.54499	0.007248
Beclin 1	435	446	NLKWGLAWVSSQ			11	1388.73	Lipids	0.05	1391.32	0.021739	1.92455	0.021739	6.5627	0.001924
Beclin 1	435	446	NLKWGLAWVSSQ			11	1388.73	Lipids	0.5	1391.81	0.087197	2.41737	0.087197	6.56175	0.00779
Beclin 1	435	446	NLKWGLAWVSSQ			11	1388.73	Lipids	5	1392.16	0.035767	2.76762	0.035767	6.57998	0.010115
Beclin 1	435	446	NLKWGLAWVSSQ			11	1388.73	Lipids	50	1392.66	0.090467	3.27019	0.090467	6.60008	0.00736
VPS15	26	37	FEYDKSLGSTRF			11	1449.7	Default State	0	1450.39	0	0	0	9.68991	0
VPS15	26	37	FEYDKSLGSTRF			11	1449.7	Default State	0.005	1452	0.09257	1.61689	0.09257	9.63891	0.013352
VPS15	26	37	FEYDKSLGSTRF			11	1449.7	Default State	0.05	1452.74	0.039588	2.35056	0.039588	9.65892	0.012254
VPS15	26	37	FEYDKSLGSTRF			11	1449.7	Default State	0.5	1452.97	0.079508	2.58116	0.079508	9.66604	0.006471
VPS15	26	37	FEYDKSLGSTRF			11	1449.7	Default State	5	1453.65	0.001744	3.2607	0.001744	9.69007	0.012218
VPS15	26	37	FEYDKSLGSTRF			11	1449.7	Default State	50	1454.39	0.070418	4.00792	0.070418	9.71007	0.004697
VPS15	26	37	FEYDKSLGSTRF			11	1449.7	Lipids	0	1450.39	0	0	0	9.68991	0
VPS15	26	37	FEYDKSLGSTRF			11	1449.7	Lipids	0.005	1452.06	0.046341	1.67633	0.046341	9.67506	0.000121
VPS15	26	37	FEYDKSLGSTRF			11	1449.7	Lipids	0.05	1452.81	0.005795	2.42818	0.005795	9.6605	0.005149
VPS15	26	37	FEYDKSLGSTRF			11	1449.7	Lipids	0.5	1453.17	0.046983	2.78097	0.046983	9.67821	0.00754
VPS15	26	37	FEYDKSLGSTRF			11	1449.7	Lipids	5	1453.7	0.10871	3.31661	0.10871	9.69409	0.008482
VPS15	26	37	FEYDKSLGSTRF			11	1449.7	Lipids	50	1454.57	0.102812	4.18721	0.102812	9.72411	0.004435
VPS15	28	37	YDKSLGSTRF			9	1173.59	Default State	0	1174.09	0	0	0	8.19116	0
VPS15	28	37	YDKSLGSTRF			9	1173.59	Default State	0.005	1175.69	0.022075	1.59596	0.022075	8.11689	0.028294
VPS15	28	37	YDKSLGSTRF			9	1173.59	Default State	0.05	1176.16	0.041456	2.06922	0.041456	8.14832	0.007607
VPS15	28	37	YDKSLGSTRF			9	1173.59	Default State	0.5	1176.45	0.024431	2.35907	0.024431	8.15482	0.027423
VPS15	28	37	YDKSLGSTRF			9	1173.59	Default State	5	1177.12	0.109162	3.0238	0.109162	8.18166	0.004632
VPS15	28	37	YDKSLGSTRF			9	1173.59	Default State	50	1177.47	0.02938	3.37673	0.02938	8.19688	0.007102
VPS15	28	37	YDKSLGSTRF			9	1173.59	Lipids	0	1174.09	0	0	0	8.19116	0
VPS15	28	37	YDKSLGSTRF			9	1173.59	Lipids	0.005	1175.5	0.141702	1.40256	0.141702	8.17269	0.005944
VPS15	28	37	YDKSLGSTRF			9	1173.59	Lipids	0.05	1176.21	0.116033	2.1169	0.116033	8.15586	0.013308
VPS15	28	37	YDKSLGSTRF			9	1173.59	Lipids	0.5	1176.45	0.0657	2.35999	0.0657	8.17602	0.009626
VPS15	28	37	YDKSLGSTRF			9	1173.59	Lipids	5	1177.01	0.042966	2.91435	0.042966	8.18691	0.020728
VPS15	28	37	YDKSLGSTRF			9	1173.59	Lipids	50	1177.65	0.1549	3.55336	0.1549	8.21299	0.01093
VPS15	38	49	FKVARAKHREGL			11	1411.83	Default State	0	1412.52	0.066273	0	0	5.29231	0.001209
VPS15	38	49	FKVARAKHREGL			11	1411.83	Default State	0.005	1412.8	0.080777	0.275537	0.104484	5.26818	0.010429
VPS15	38	49	FKVARAKHREGL			11	1411.83	Default State	0.05	1412.92	0.078679	0.40083	0.102871	5.28231	0.004904
VPS15	38	49	FKVARAKHREGL			11	1411.83	Default State	0.5	1413.17	0.081201	0.654	0.104813	5.29458	0.010941
VPS15	38	49	FKVARAKHREGL			11	1411.83	Default State	5	1413.47	0.099883	0.953384	0.11987	5.30808	0.003613
VPS15	38	49	FKVARAKHREGL			11	1411.83	Default State	50	1413.81	0.124975	1.29056	0.14146	5.33987	0.005628
VPS15	38	49	FKVARAKHREGL			11	1411.83	Lipids	0	1412.52	0.066273	0	0	5.29231	0.001209
VPS15	38	49	FKVARAKHREGL			11	1411.83	Lipids	0.005	1412.84	0.079171	0.31579	0.103248	5.29072	0.009323
VPS15	38	49	FKVARAKHREGL			11	1411.83	Lipids	0.05	1412.96	0.074847	0.43516	0.099971	5.30075	0.003458
VPS15	38	49	FKVARAKHREGL			11	1411.83	Lipids	0.5	1413.29	0.030454	0.774064	0.072935	5.30814	0.015702
VPS15	38	49	FKVARAKHREGL			11	1411.83	Lipids	5	1413.61	0.068344	1.09261	0.0952	5.33335	0.008637
VPS15	38	49	FKVARAKHREGL			11	1411.83	Lipids	50	1413.93	0.079696	1.40757	0.103651	5.38561	0.019163
VPS15	55	71	FAIQDPTLPLTSYKQEL			14	1964.04	Default State	0	1965.14	0	0	0	11.6293	0
VPS15	55	71	FAIQDPTLPLTSYKQEL			14	1964.04	Default State	0.005	1968.14	0.115771	3.00063	0.115771	11.606	0.005678
VPS15	55	71	FAIQDPTLPLTSYKQEL			14	1964.04	Default State	0.05	1969.33	0.027345	4.1959	0.027345	11.6082	0.00411
VPS15	55	71	FAIQDPTLPLTSYKQEL			14	1964.04	Default State	0.5	1970.07	0.071432	4.93081	0.071432	11.6055	0.001793
VPS15	55	71	FAIQDPTLPLTSYKQEL			14	1964.04	Default State	5	1971.12	0.049338	5.97788	0.049338	11.6312	0.009506
VPS15	55	71	FAIQDPTLPLTSYKQEL			14	1964.04	Default State	50	1971.88	0.00843	6.7411	0.00843	11.6421	0.006793
VPS15	55	71	FAIQDPTLPLTSYKQEL			14	1964.04	Lipids	0	1965.14	0	0	0	11.6293	0
VPS15	55	71	FAIQDPTLPLTSYKQEL			14	1964.04	Lipids	0.005	1968.12	0.146881	2.9768	0.146881	11.6043	0.001873
VPS15	55	71	FAIQDPTLPLTSYKQEL			14	1964.04	Lipids	0.05	1969.42	0.052515	4.27727	0.052515	11.6069	0.004237
VPS15	55	71	FAIQDPTLPLTSYKQEL			14	1964.04	Lipids	0.5	1970.11	0.06016	4.97335	0.06016	11.6086	0.006502
VPS15	55	71	FAIQDPTLPLTSYKQEL			14	1964.04	Lipids	5	1971.21	0.044455	6.06843	0.044455	11.6271	0.0083
VPS15	55	71	FAIQDPTLPLTSYKQEL			14	1964.04	Lipids	50	1971.93	0.006757	6.79469	0.006757	11.648	0.001721
VPS15	72	78	EELKIRL			6	900.551	Default State	0	900.978	0.015111	0	0	9.49743	0.004798
VPS15	72	78	EELKIRL			6	900.551	Default State	0.005	901.03	0.056346	0.052551	0.058338	9.44991	0.014932
VPS15	72	78	EELKIRL			6	900.551	Default State	0.05	901.1	0.070954	0.122609	0.072545	9.46867	0.004359
VPS15	72	78	EELKIRL			6	900.551	Default State	0.5	901.158	0.068048	0.180025	0.069706	9.47863	0.008148
VPS15	72	78	EELKIRL			6	900.551	Default State	5	901.21	0.085481	0.232278	0.086807	9.50084	0.007639
VPS15	72	78	EELKIRL			6	900.551	Default State	50	902.006	0.111969	1.0282	0.112984	9.52257	0.006834
VPS15	72	78	EELKIRL			6	900.551	Lipids	0	900.978	0.015111	0	0	9.49743	0.004798
VPS15	72	78	EELKIRL			6	900.551	Lipids	0.005	900.973	0.070683	-0.004593	0.07228	9.47152	0.006266
VPS15	72	78	EELKIRL			6	900.551	Lipids	0.05	901.112	0.025537	0.134193	0.029673	9.47209	0.015631
VPS15	72	78	EELKIRL			6	900.551	Lipids	0.5	901.093	0.102197	0.115633	0.103308	9.49313	0.010018
VPS15	72	78	EELKIRL			6	900.551	Lipids	5	901.252	0.086529	0.274425	0.087839	9.51182	0.009246
VPS15	72	78	EELKIRL			6	900.551	Lipids	50	901.961	0.153548	0.982709	0.154289	9.541	0.008991
VPS15	75	92	KIRLNSAQNCLPFQKASE			16	2047.08	Default State	0	2048.29	0.028933	0	0	8.94418	0.003344
VPS15	75	92	KIRLNSAQNCLPFQKASE			16	2047.08	Default State	0.005	2050.37	0.10743	2.07877	0.111258	8.90238	0.013655
VPS15	75	92	KIRLNSAQNCLPFQKASE			16	2047.08	Default State	0.05	2051.55	0.086465	3.26069	0.091178	8.91187	0.007297
VPS15	75	92	KIRLNSAQNCLPFQKASE			16	2047.08	Default State	0.5	2052.37	0.046364	4.08833	0.054651	8.92286	0.007861
VPS15	75	92	KIRLNSAQNCLPFQKASE			16	2047.08	Default State	5	2053.3	0.104886	5.01601	0.108804	8.94629	0.007273
VPS15	75	92	KIRLNSAQNCLPFQKASE			16	2047.08	Default State	50	2054.79	0.149432	6.50158	0.152207	8.93606	0.029323
VPS15	75	92	KIRLNSAQNCLPFQKASE			16	2047.08	Lipids	0	2048.29	0.028933	0	0	8.94418	0.003344
VPS15	75	92	KIRLNSAQNCLPFQKASE			16	2047.08	Lipids	0.005	2050.53	0.100659	2.23927	0.104734	8.92532	0.006127
VPS15	75	92	KIRLNSAQNCLPFQKASE			16	2047.08	Lipids	0.05	2051.6	0.164047	3.31587	0.166579	8.92928	0.006527
VPS15	75	92	KIRLNSAQNCLPFQKASE			16	2047.08	Lipids	0.5	2052.44	0.123979	4.15724	0.127311	8.93542	0.008521
VPS15	75	92	KIRLNSAQNCLPFQKASE			16	2047.08	Lipids	5	2053.36	0.08849	5.07128	0.093099	8.94881	0.01181
VPS15	75	92	KIRLNSAQNCLPFQKASE			16	2047.08	Lipids	50	2054.77	0.076021	6.48044	0.081341	8.97705	0.007143
VPS15	79	92	NSAQNCLPFQKASE			12	1536.71	Default State	0	1537.47	0	0	0	9.39316	0
VPS15	79	92	NSAQNCLPFQKASE			12	1536.71	Default State	0.005	1538.75	0.203296	1.27735	0.203296	8.89876	0.006757
VPS15	79	92	NSAQNCLPFQKASE			12	1536.71	Default State	0.05	1539.23	0.079165	1.75359	0.079165	8.89082	0.007368
VPS15	79	92	NSAQNCLPFQKASE			12	1536.71	Default State	0.5	1539.59	0.113766	2.12021	0.113766	8.90862	0.007825
VPS15	79	92	NSAQNCLPFQKASE			12	1536.71	Default State	5	1540.06	0.02296	2.58171	0.02296	8.93588	0.006953
VPS15	79	92	NSAQNCLPFQKASE			12	1536.71	Default State	50	1540.29	0.086166	2.81876	0.086166	8.94498	0.033416
VPS15	79	92	NSAQNCLPFQKASE			12	1536.71	Lipids	0	1537.47	0	0	0	9.39316	0
VPS15	79	92	NSAQNCLPFQKASE			12	1536.71	Lipids	0.005	1538.9	0.010897	1.4239	0.010897	8.91151	0.011686
VPS15	79	92	NSAQNCLPFQKASE			12	1536.71	Lipids	0.05	1539.55	0.347108	2.07902	0.347108	8.92832	0.018384
VPS15	79	92	NSAQNCLPFQKASE			12	1536.71	Lipids	0.5	1539.68	0.089783	2.20358	0.089783	8.93107	0.012427
VPS15	79	92	NSAQNCLPFQKASE			12	1536.71	Lipids	5	1540.12	0.028496	2.64236	0.028496	8.93111	0.010095
VPS15	79	92	NSAQNCLPFQKASE			12	1536.71	Lipids	50	1540.54	0.053859	3.06048	0.053859	8.96616	0.00883
VPS15	79	100	NSAQNCLPFQKASEKASEKAAM			20	2353.13	Default State	0	2354.53	0.035356	0	0	8.67206	0.003193
VPS15	79	100	NSAQNCLPFQKASEKASEKAAM			20	2353.13	Default State	0.005	2358.65	0.189873	4.12101	0.193136	8.61148	0.011035
VPS15	79	100	NSAQNCLPFQKASEKASEKAAM			20	2353.13	Default State	0.05	2359.83	0.144885	5.29711	0.149136	8.62777	0.006355
VPS15	79	100	NSAQNCLPFQKASEKASEKAAM			20	2353.13	Default State	0.5	2360.7	0.238051	6.1708	0.240663	8.62854	0.006006
VPS15	79	100	NSAQNCLPFQKASEKASEKAAM			20	2353.13	Default State	5	2362.19	0.204408	7.66333	0.207443	8.63925	0.008941
VPS15	79	100	NSAQNCLPFQKASEKASEKAAM			20	2353.13	Default State	50	2363.6	0.032027	9.06671	0.047705	8.65347	0.006038
VPS15	79	100	NSAQNCLPFQKASEKASEKAAM			20	2353.13	Lipids	0	2354.53	0.035356	0	0	8.67206	0.003193
VPS15	79	100	NSAQNCLPFQKASEKASEKAAM			20	2353.13	Lipids	0.005	2358.79	0.143292	4.25491	0.147589	8.63589	0.001214
VPS15	79	100	NSAQNCLPFQKASEKASEKAAM			20	2353.13	Lipids	0.05	2359.82	0.078555	5.28884	0.086145	8.63239	0.001962
VPS15	79	100	NSAQNCLPFQKASEKASEKAAM			20	2353.13	Lipids	0.5	2360.77	0.076202	6.23804	0.084005	8.63903	0.00531
VPS15	79	100	NSAQNCLPFQKASEKASEKAAM			20	2353.13	Lipids	5	2362.14	0.087948	7.60798	0.094789	8.6506	0.006043
VPS15	79	100	NSAQNCLPFQKASEKASEKAAM			20	2353.13	Lipids	50	2363.66	0.150616	9.12844	0.15471	8.66947	0.00223
VPS15	83	101	NCLPFQKASEKASEKAAML			17	2066.04	Default State	0	2067.2	0	0	0	9.5279	0
VPS15	83	101	NCLPFQKASEKASEKAAML			17	2066.04	Default State	0.005	2071.09	0.133067	3.88718	0.133067	9.47715	0.007811
VPS15	83	101	NCLPFQKASEKASEKAAML			17	2066.04	Default State	0.05	2071.88	0.170339	4.67377	0.170339	9.4818	0.006123
VPS15	83	101	NCLPFQKASEKASEKAAML			17	2066.04	Default State	0.5	2074.31	0.010752	7.10946	0.010752	9.01854	0.003228
VPS15	83	101	NCLPFQKASEKASEKAAML			17	2066.04	Default State	5	2074.64	0.113607	7.4345	0.113607	9.03262	0.014898
VPS15	83	101	NCLPFQKASEKASEKAAML			17	2066.04	Default State	50	2075.12	0.222314	7.91534	0.222314	9.2081	0.240319
VPS15	83	101	NCLPFQKASEKASEKAAML			17	2066.04	Lipids	0	2067.2	0	0	0	9.5279	0
VPS15	83	101	NCLPFQKASEKASEKAAML			17	2066.04	Lipids	0.005	2071.31	0.190036	4.10382	0.190036	9.4985	0.00082
VPS15	83	101	NCLPFQKASEKASEKAAML			17	2066.04	Lipids	0.05	2071.99	0.097925	4.78825	0.097925	9.4888	0.007607
VPS15	83	101	NCLPFQKASEKASEKAAML			17	2066.04	Lipids	0.5	2074.19	0.171709	6.98438	0.171709	9.04051	0.006625
VPS15	83	101	NCLPFQKASEKASEKAAML			17	2066.04	Lipids	5	2074.9	0.023331	7.6965	0.023331	9.0385	0.019825
VPS15	83	101	NCLPFQKASEKASEKAAML			17	2066.04	Lipids	50	2075.68	0.143854	8.47522	0.143854	9.08534	0.010575
VPS15	92	106	EKASEKAAMLFRQYV			14	1770.92	Default State	0	1771.76	0	0	0	7.17867	0
VPS15	92	106	EKASEKAAMLFRQYV			14	1770.92	Default State	0.005	1778.62	0.063591	6.86397	0.063591	7.11932	0.008525
VPS15	92	106	EKASEKAAMLFRQYV			14	1770.92	Default State	0.05	1778.84	0.089947	7.08538	0.089947	7.13226	0.003638
VPS15	92	106	EKASEKAAMLFRQYV			14	1770.92	Default State	0.5	1778.89	0.09265	7.13015	0.09265	7.13368	0.009883
VPS15	92	106	EKASEKAAMLFRQYV			14	1770.92	Default State	5	1779.07	0.014204	7.30796	0.014204	7.14893	0.007451
VPS15	92	106	EKASEKAAMLFRQYV			14	1770.92	Default State	50	1779.05	0.171424	7.29116	0.171424	7.1625	0.001582
VPS15	92	106	EKASEKAAMLFRQYV			14	1770.92	Lipids	0	1771.76	0	0	0	7.17867	0
VPS15	92	106	EKASEKAAMLFRQYV			14	1770.92	Lipids	0.005	1778.87	0.022688	7.11074	0.022688	7.13538	0.007527
VPS15	92	106	EKASEKAAMLFRQYV			14	1770.92	Lipids	0.05	1779.05	0.124471	7.28894	0.124471	7.1382	0.002563
VPS15	92	106	EKASEKAAMLFRQYV			14	1770.92	Lipids	0.5	1778.82	0.093933	7.06193	0.093933	7.14651	0.007589
VPS15	92	106	EKASEKAAMLFRQYV			14	1770.92	Lipids	5	1779.16	0.043775	7.4043	0.043775	7.15602	0.003605
VPS15	92	106	EKASEKAAMLFRQYV			14	1770.92	Lipids	50	1779.24	0.227123	7.47966	0.227123	7.17014	0.000708
VPS15	92	113	EKASEKAAMLFRQYVRDNLYDR			21	2703.37	Default State	0	2705.07	0.032904	0	0	9.22184	0.004649
VPS15	92	113	EKASEKAAMLFRQYVRDNLYDR			21	2703.37	Default State	0.005	2706.17	0.1809	1.1006	0.183868	9.1805	0.014929
VPS15	92	113	EKASEKAAMLFRQYVRDNLYDR			21	2703.37	Default State	0.05	2708.36	0.084003	3.29226	0.090218	9.18451	0.002017
VPS15	92	113	EKASEKAAMLFRQYVRDNLYDR			21	2703.37	Default State	0.5	2711.79	0.224758	6.72481	0.227154	9.16781	0.011018
VPS15	92	113	EKASEKAAMLFRQYVRDNLYDR			21	2703.37	Default State	5	2713.81	0.419612	8.73876	0.4209	9.19479	0.006652
VPS15	92	113	EKASEKAAMLFRQYVRDNLYDR			21	2703.37	Default State	50	2715.78	0.164691	10.709	0.167945	9.21537	0.010924
VPS15	92	113	EKASEKAAMLFRQYVRDNLYDR			21	2703.37	Lipids	0	2705.07	0.032904	0	0	9.22184	0.004649
VPS15	92	113	EKASEKAAMLFRQYVRDNLYDR			21	2703.37	Lipids	0.005	2706.55	0.300341	1.47664	0.302138	9.2005	0.000132
VPS15	92	113	EKASEKAAMLFRQYVRDNLYDR			21	2703.37	Lipids	0.05	2708.52	0.287544	3.45532	0.289421	9.16955	0.026883
VPS15	92	113	EKASEKAAMLFRQYVRDNLYDR			21	2703.37	Lipids	0.5	2711.95	0.202574	6.87959	0.205229	9.18205	0.016786
VPS15	92	113	EKASEKAAMLFRQYVRDNLYDR			21	2703.37	Lipids	5	2714.19	0.142233	9.11605	0.14599	9.2028	0.011812
VPS15	92	113	EKASEKAAMLFRQYVRDNLYDR			21	2703.37	Lipids	50	2715.75	0.277684	10.6766	0.279627	9.24183	0.011681
VPS15	93	101	KASEKAAML			8	948.518	Default State	0	948.812	1.13687e-13	0	0	6.82402	0
VPS15	93	101	KASEKAAML			8	948.518	Default State	0.005	950.423	0.134095	1.6107	0.134095	6.78187	0.0285
VPS15	93	101	KASEKAAML			8	948.518	Default State	0.05	950.438	0.076514	1.62604	0.076514	6.80511	0.002611
VPS15	93	101	KASEKAAML			8	948.518	Default State	0.5	950.862	0.113121	2.04978	0.113121	6.82003	0.006897
VPS15	93	101	KASEKAAML			8	948.518	Default State	5	951.53	0.05371	2.71775	0.05371	6.82714	0.00772
VPS15	93	101	KASEKAAML			8	948.518	Default State	50	952.222	0.126599	3.40963	0.126599	6.8518	0.002191
VPS15	93	101	KASEKAAML			8	948.518	Lipids	0	948.812	1.13687e-13	0	0	6.82402	0
VPS15	93	101	KASEKAAML			8	948.518	Lipids	0.005	950.529	0.073482	1.71711	0.073482	6.81833	0.013609
VPS15	93	101	KASEKAAML			8	948.518	Lipids	0.05	950.465	0.074348	1.6531	0.074348	6.83121	0.004612
VPS15	93	101	KASEKAAML			8	948.518	Lipids	0.5	950.855	0.029	2.04292	0.029	6.83016	0.012003
VPS15	93	101	KASEKAAML			8	948.518	Lipids	5	951.644	0.096451	2.83198	0.096451	6.84882	0.008803
VPS15	93	101	KASEKAAML			8	948.518	Lipids	50	952.176	0.060137	3.36393	0.060137	6.86594	0.002777
VPS15	101	110	LFRQYVRDNL			9	1323.72	Default State	0	1324.26	0	0	0	9.13428	0
VPS15	101	110	LFRQYVRDNL			9	1323.72	Default State	0.005	1324.61	0.084934	0.351765	0.084934	9.07033	0.029332
VPS15	101	110	LFRQYVRDNL			9	1323.72	Default State	0.05	1324.44	0.020431	0.183831	0.020431	9.09323	0.00403
VPS15	101	110	LFRQYVRDNL			9	1323.72	Default State	0.5	1324.53	0.075343	0.271691	0.075343	9.1121	0.016426
VPS15	101	110	LFRQYVRDNL			9	1323.72	Default State	5	1325.32	0.043073	1.06615	0.043073	9.15044	0.005825
VPS15	101	110	LFRQYVRDNL			9	1323.72	Default State	50	1326.05	0.062321	1.79341	0.062321	9.16507	0.024317
VPS15	101	110	LFRQYVRDNL			9	1323.72	Lipids	0	1324.26	0	0	0	9.13428	0
VPS15	101	110	LFRQYVRDNL			9	1323.72	Lipids	0.005	1324.55	0.048831	0.295047	0.048831	9.11048	0.013763
VPS15	101	110	LFRQYVRDNL			9	1323.72	Lipids	0.05	1324.51	0.077433	0.253182	0.077433	9.11915	0.016303
VPS15	101	110	LFRQYVRDNL			9	1323.72	Lipids	0.5	1324.8	0.026792	0.545977	0.026792	9.13005	0.007521
VPS15	101	110	LFRQYVRDNL			9	1323.72	Lipids	5	1325.54	0.055345	1.28553	0.055345	9.15152	0.013551
VPS15	101	110	LFRQYVRDNL			9	1323.72	Lipids	50	1325.96	0.052113	1.69796	0.052113	9.19637	0.013685
VPS15	102	108	FRQYVRD			6	983.506	Default State	0	983.927	0.024355	0	0	6.59937	0.00043
VPS15	102	108	FRQYVRD			6	983.506	Default State	0.005	984.024	0.062123	0.097018	0.066727	6.56797	0.007616
VPS15	102	108	FRQYVRD			6	983.506	Default State	0.05	984.229	0.061551	0.302283	0.066195	6.57766	0.006168
VPS15	102	108	FRQYVRD			6	983.506	Default State	0.5	984.384	0.013944	0.45666	0.028064	6.58782	0.006636
VPS15	102	108	FRQYVRD			6	983.506	Default State	5	985.008	0.075001	1.08076	0.078856	6.60379	0.005435
VPS15	102	108	FRQYVRD			6	983.506	Default State	50	985.384	0.108876	1.45736	0.111567	6.62441	0.009113
VPS15	102	108	FRQYVRD			6	983.506	Lipids	0	983.927	0.024355	0	0	6.59937	0.00043
VPS15	102	108	FRQYVRD			6	983.506	Lipids	0.005	984.154	0.021096	0.226982	0.032221	6.58825	0.007315
VPS15	102	108	FRQYVRD			6	983.506	Lipids	0.05	984.299	0.03322	0.372184	0.041191	6.60055	0.001373
VPS15	102	108	FRQYVRD			6	983.506	Lipids	0.5	984.395	0.04669	0.468028	0.05266	6.59696	0.007918
VPS15	102	108	FRQYVRD			6	983.506	Lipids	5	985.031	0.017213	1.10353	0.029824	6.61473	0.005931
VPS15	102	108	FRQYVRD			6	983.506	Lipids	50	985.417	0.138578	1.48992	0.140702	6.62722	0.003242
VPS15	111	120	YDRISTRPFL			8	1267.68	Default State	0	1268.39	0	0	0	9.98787	0
VPS15	111	120	YDRISTRPFL			8	1267.68	Default State	0.005	1268.79	0.038755	0.396665	0.038755	9.95093	0.022371
VPS15	111	120	YDRISTRPFL			8	1267.68	Default State	0.05	1269.1	0.076135	0.708872	0.076135	9.96213	0.002942
VPS15	111	120	YDRISTRPFL			8	1267.68	Default State	0.5	1269.13	0.081083	0.737619	0.081083	9.9732	0.010956
VPS15	111	120	YDRISTRPFL			8	1267.68	Default State	5	1269.6	0.159755	1.20672	0.159755	10.0105	0.014526
VPS15	111	120	YDRISTRPFL			8	1267.68	Default State	50	1270.2	0.060087	1.81041	0.060087	10.0265	0.011967
VPS15	111	120	YDRISTRPFL			8	1267.68	Lipids	0	1268.39	0	0	0	9.98787	0
VPS15	111	120	YDRISTRPFL			8	1267.68	Lipids	0.005	1268.65	0.120653	0.256679	0.120653	9.97335	0.004995
VPS15	111	120	YDRISTRPFL			8	1267.68	Lipids	0.05	1269.02	0.072635	0.628031	0.072635	9.9691	0.001111
VPS15	111	120	YDRISTRPFL			8	1267.68	Lipids	0.5	1269.26	0.104137	0.868049	0.104137	9.98636	0.010232
VPS15	111	120	YDRISTRPFL			8	1267.68	Lipids	5	1269.56	0.149974	1.1652	0.149974	10.0094	0.013675
VPS15	111	120	YDRISTRPFL			8	1267.68	Lipids	50	1270.14	0.074312	1.74565	0.074312	10.0409	0.007353
VPS15	111	124	YDRISTRPFLNNIE			12	1737.89	Default State	0	1738.87	2.27374e-13	0	0	10.023	0
VPS15	111	124	YDRISTRPFLNNIE			12	1737.89	Default State	0.005	1739.81	0.104567	0.940422	0.104567	9.98214	0.015226
VPS15	111	124	YDRISTRPFLNNIE			12	1737.89	Default State	0.05	1740.72	0.045875	1.84962	0.045875	9.99828	0.00569
VPS15	111	124	YDRISTRPFLNNIE			12	1737.89	Default State	0.5	1740.8	0.170364	1.92754	0.170364	10.0056	0.007615
VPS15	111	124	YDRISTRPFLNNIE			12	1737.89	Default State	5	1741.46	0.06004	2.59266	0.06004	10.0302	0.01278
VPS15	111	124	YDRISTRPFLNNIE			12	1737.89	Default State	50	1742.2	0.033013	3.33316	0.033013	10.0505	0.006359
VPS15	111	124	YDRISTRPFLNNIE			12	1737.89	Lipids	0	1738.87	2.27374e-13	0	0	10.023	0
VPS15	111	124	YDRISTRPFLNNIE			12	1737.89	Lipids	0.005	1740.04	0.126491	1.16923	0.126491	10.0071	0.005333
VPS15	111	124	YDRISTRPFLNNIE			12	1737.89	Lipids	0.05	1740.79	0.034895	1.91579	0.034895	10.0036	0.001297
VPS15	111	124	YDRISTRPFLNNIE			12	1737.89	Lipids	0.5	1740.81	0.081503	1.94174	0.081503	10.0132	0.006894
VPS15	111	124	YDRISTRPFLNNIE			12	1737.89	Lipids	5	1741.46	0.157618	2.59092	0.157618	10.0365	0.010513
VPS15	111	124	YDRISTRPFLNNIE			12	1737.89	Lipids	50	1742.23	0.091621	3.35619	0.091621	10.0546	0.004474
VPS15	121	130	NNIEKRWIAF			9	1290.7	Default State	0	1291.39	0.109306	0	0	11.0193	0.002883
VPS15	121	130	NNIEKRWIAF			9	1290.7	Default State	0.005	1291.63	0.048909	0.240067	0.119749	10.9811	0.013193
VPS15	121	130	NNIEKRWIAF			9	1290.7	Default State	0.05	1291.92	0.039194	0.537623	0.116121	10.9947	0.002364
VPS15	121	130	NNIEKRWIAF			9	1290.7	Default State	0.5	1291.95	0.103647	0.562654	0.150634	11.0062	0.007847
VPS15	121	130	NNIEKRWIAF			9	1290.7	Default State	5	1292.07	0.144572	0.687234	0.181242	11.0474	0.014634
VPS15	121	130	NNIEKRWIAF			9	1290.7	Default State	50	1292.07	0.155241	0.684055	0.189862	11.0804	0.013723
VPS15	121	130	NNIEKRWIAF			9	1290.7	Lipids	0	1291.39	0.109306	0	0	11.0193	0.002883
VPS15	121	130	NNIEKRWIAF			9	1290.7	Lipids	0.005	1291.63	0.113577	0.244636	0.157631	10.9955	0.00297
VPS15	121	130	NNIEKRWIAF			9	1290.7	Lipids	0.05	1291.91	0.055957	0.526353	0.122797	10.9977	0.003013
VPS15	121	130	NNIEKRWIAF			9	1290.7	Lipids	0.5	1291.93	0.047463	0.543718	0.119166	11.0184	0.00764
VPS15	121	130	NNIEKRWIAF			9	1290.7	Lipids	5	1291.95	0.034784	0.56148	0.114707	11.0471	0.009902
VPS15	121	130	NNIEKRWIAF			9	1290.7	Lipids	50	1291.99	0.136853	0.602739	0.175147	11.0925	0.009389
VPS15	134	153	TAVDQAHKSGVRHGDIKTEN			19	2163.09	Default State	0	2164.18	0.027688	0	0	5.00797	0.00251
VPS15	134	153	TAVDQAHKSGVRHGDIKTEN			19	2163.09	Default State	0.005	2164.67	0.138523	0.488045	0.141263	5.00678	0.007031
VPS15	134	153	TAVDQAHKSGVRHGDIKTEN			19	2163.09	Default State	0.05	2164.92	0.102576	0.741926	0.106247	5.00217	0.003783
VPS15	134	153	TAVDQAHKSGVRHGDIKTEN			19	2163.09	Default State	0.5	2165.23	0.124368	1.04874	0.127413	5.00925	0.004062
VPS15	134	153	TAVDQAHKSGVRHGDIKTEN			19	2163.09	Default State	5	2165.61	0.093596	1.42679	0.097606	5.00896	0.002655
VPS15	134	153	TAVDQAHKSGVRHGDIKTEN			19	2163.09	Default State	50	2165.7	0.09022	1.521	0.094373	5.00914	0.002757
VPS15	134	153	TAVDQAHKSGVRHGDIKTEN			19	2163.09	Lipids	0	2164.18	0.027688	0	0	5.00797	0.00251
VPS15	134	153	TAVDQAHKSGVRHGDIKTEN			19	2163.09	Lipids	0.005	2164.65	0.075692	0.471637	0.080597	5.00933	0.002911
VPS15	134	153	TAVDQAHKSGVRHGDIKTEN			19	2163.09	Lipids	0.05	2164.94	0.068385	0.758077	0.073778	5.01607	0.002932
VPS15	134	153	TAVDQAHKSGVRHGDIKTEN			19	2163.09	Lipids	0.5	2165.27	0.083376	1.08872	0.087853	5.00725	0.002873
VPS15	134	153	TAVDQAHKSGVRHGDIKTEN			19	2163.09	Lipids	5	2165.62	0.123093	1.43718	0.126169	5.01215	0.006238
VPS15	134	153	TAVDQAHKSGVRHGDIKTEN			19	2163.09	Lipids	50	2165.79	0.057791	1.60866	0.064082	5.00835	0.003472
VPS15	134	154	TAVDQAHKSGVRHGDIKTENV			20	2262.16	Default State	0	2263.49	0.100079	0	0	5.53365	0.003533
VPS15	134	154	TAVDQAHKSGVRHGDIKTENV			20	2262.16	Default State	0.005	2263.74	0.123253	0.248374	0.158767	5.52529	0.004457
VPS15	134	154	TAVDQAHKSGVRHGDIKTENV			20	2262.16	Default State	0.05	2264.03	0.092718	0.544964	0.136427	5.52811	0.004436
VPS15	134	154	TAVDQAHKSGVRHGDIKTENV			20	2262.16	Default State	0.5	2264.35	0.124938	0.856033	0.160079	5.53724	0.006553
VPS15	134	154	TAVDQAHKSGVRHGDIKTENV			20	2262.16	Default State	5	2264.88	0.079066	1.38644	0.127543	5.5379	0.004162
VPS15	134	154	TAVDQAHKSGVRHGDIKTENV			20	2262.16	Default State	50	2265.05	0.119035	1.56344	0.155516	5.54564	0.004198
VPS15	134	154	TAVDQAHKSGVRHGDIKTENV			20	2262.16	Lipids	0	2263.49	0.100079	0	0	5.53365	0.003533
VPS15	134	154	TAVDQAHKSGVRHGDIKTENV			20	2262.16	Lipids	0.005	2263.86	0.099561	0.372299	0.141167	5.53577	0.002935
VPS15	134	154	TAVDQAHKSGVRHGDIKTENV			20	2262.16	Lipids	0.05	2264.08	0.104318	0.588061	0.144561	5.54111	0.005572
VPS15	134	154	TAVDQAHKSGVRHGDIKTENV			20	2262.16	Lipids	0.5	2264.49	0.071897	0.999279	0.123227	5.54004	0.007655
VPS15	134	154	TAVDQAHKSGVRHGDIKTENV			20	2262.16	Lipids	5	2264.87	0.100506	1.37973	0.141835	5.54864	0.005418
VPS15	134	154	TAVDQAHKSGVRHGDIKTENV			20	2262.16	Lipids	50	2265.06	0.069186	1.5736	0.121665	5.55229	0.004067
VPS15	136	155	VDQAHKSGVRHGDIKTENVM			19	2221.11	Default State	0	2222.38	0.182327	0	0	5.91095	0.002848
VPS15	136	155	VDQAHKSGVRHGDIKTENVM			19	2221.11	Default State	0.005	2222.73	0.091073	0.351554	0.203808	5.88434	0.008927
VPS15	136	155	VDQAHKSGVRHGDIKTENVM			19	2221.11	Default State	0.05	2223	0.078478	0.622403	0.1985	5.88996	0.004051
VPS15	136	155	VDQAHKSGVRHGDIKTENVM			19	2221.11	Default State	0.5	2223.28	0.113433	0.899873	0.214733	5.90562	0.004608
VPS15	136	155	VDQAHKSGVRHGDIKTENVM			19	2221.11	Default State	5	2223.74	0.075583	1.36586	0.197373	5.91693	0.00514
VPS15	136	155	VDQAHKSGVRHGDIKTENVM			19	2221.11	Default State	50	2223.79	0.116651	1.40991	0.21645	5.93537	0.004633
VPS15	136	155	VDQAHKSGVRHGDIKTENVM			19	2221.11	Lipids	0	2222.38	0.182327	0	0	5.91095	0.002848
VPS15	136	155	VDQAHKSGVRHGDIKTENVM			19	2221.11	Lipids	0.005	2222.9	0.09549	0.52682	0.205819	5.89927	0.010956
VPS15	136	155	VDQAHKSGVRHGDIKTENVM			19	2221.11	Lipids	0.05	2222.99	0.114571	0.610303	0.215337	5.9073	0.003499
VPS15	136	155	VDQAHKSGVRHGDIKTENVM			19	2221.11	Lipids	0.5	2223.37	0.038943	0.997439	0.18644	5.9142	0.010743
VPS15	136	155	VDQAHKSGVRHGDIKTENVM			19	2221.11	Lipids	5	2223.78	0.102623	1.39787	0.209224	5.93075	0.006314
VPS15	136	155	VDQAHKSGVRHGDIKTENVM			19	2221.11	Lipids	50	2223.87	0.104032	1.49738	0.209919	5.9449	0.007063
VPS15	148	175	DIKTENVMVTSWNWVLLTDFASFKPTYL			26	3318.68	Default State	0	3320.84	0	0	0	17.4349	0
VPS15	148	175	DIKTENVMVTSWNWVLLTDFASFKPTYL			26	3318.68	Default State	0.005	3324.99	0.711174	4.15577	0.711174	17.3977	0.03518
VPS15	148	175	DIKTENVMVTSWNWVLLTDFASFKPTYL			26	3318.68	Default State	0.05	3326.18	0.194171	5.3388	0.194171	17.4038	0.047903
VPS15	148	175	DIKTENVMVTSWNWVLLTDFASFKPTYL			26	3318.68	Default State	0.5	3326.75	0.41805	5.90745	0.41805	17.4045	0.052883
VPS15	148	175	DIKTENVMVTSWNWVLLTDFASFKPTYL			26	3318.68	Default State	5	3328.34	0.293865	7.50387	0.293865	17.3388	0.043059
VPS15	148	175	DIKTENVMVTSWNWVLLTDFASFKPTYL			26	3318.68	Default State	50	3329.02	0.1593	8.18186	0.1593	17.412	0.028492
VPS15	148	175	DIKTENVMVTSWNWVLLTDFASFKPTYL			26	3318.68	Lipids	0	3320.84	0	0	0	17.4349	0
VPS15	148	175	DIKTENVMVTSWNWVLLTDFASFKPTYL			26	3318.68	Lipids	0.005	3325.56	0.255613	4.72293	0.255613	17.4264	0.03574
VPS15	148	175	DIKTENVMVTSWNWVLLTDFASFKPTYL			26	3318.68	Lipids	0.05	3326.51	0.290159	5.67549	0.290159	17.3343	0.020741
VPS15	148	175	DIKTENVMVTSWNWVLLTDFASFKPTYL			26	3318.68	Lipids	0.5	3326.76	0.222559	5.92142	0.222559	17.3894	0.019646
VPS15	148	175	DIKTENVMVTSWNWVLLTDFASFKPTYL			26	3318.68	Lipids	5	3327.76	0.306352	6.92553	0.306352	17.4083	0.012983
VPS15	148	175	DIKTENVMVTSWNWVLLTDFASFKPTYL			26	3318.68	Lipids	50	3328.86	0.604629	8.01885	0.604629	17.282	0.103122
VPS15	156	163	VTSWNWVL			7	1004.52	Default State	0	1005.06	0.003066	0	0	13.6259	0.000437
VPS15	156	163	VTSWNWVL			7	1004.52	Default State	0.005	1005.09	0.028693	0.035215	0.028856	13.6156	0.004126
VPS15	156	163	VTSWNWVL			7	1004.52	Default State	0.05	1005.16	0.050964	0.100491	0.051056	13.6242	0.002535
VPS15	156	163	VTSWNWVL			7	1004.52	Default State	0.5	1005.06	0.113107	0.004726	0.113149	13.6239	0.005601
VPS15	156	163	VTSWNWVL			7	1004.52	Default State	5	1005.17	0.108107	0.109096	0.10815	13.6296	0.006683
VPS15	156	163	VTSWNWVL			7	1004.52	Default State	50	1005.51	0.028186	0.450231	0.028352	13.6253	0.004625
VPS15	156	163	VTSWNWVL			7	1004.52	Lipids	0	1005.06	0.003066	0	0	13.6259	0.000437
VPS15	156	163	VTSWNWVL			7	1004.52	Lipids	0.005	1005.12	0.027678	0.062947	0.027848	13.6123	0.004171
VPS15	156	163	VTSWNWVL			7	1004.52	Lipids	0.05	1005.12	0.045183	0.067172	0.045287	13.6247	0.008204
VPS15	156	163	VTSWNWVL			7	1004.52	Lipids	0.5	1005.14	0.061476	0.086616	0.061553	13.617	0.004088
VPS15	156	163	VTSWNWVL			7	1004.52	Lipids	5	1005.22	0.038188	0.164125	0.038311	13.6146	0.005205
VPS15	156	163	VTSWNWVL			7	1004.52	Lipids	50	1005.52	0.022028	0.458918	0.02224	13.6245	0.003006
VPS15	157	163	TSWNWVL			6	905.452	Default State	0	905.739	0	0	0	13.5942	0
VPS15	157	163	TSWNWVL			6	905.452	Default State	0.005	905.896	0.07207	0.157154	0.07207	13.5817	0.006348
VPS15	157	163	TSWNWVL			6	905.452	Default State	0.05	905.913	0.035452	0.17421	0.035452	13.5888	0.003999
VPS15	157	163	TSWNWVL			6	905.452	Default State	0.5	905.948	0.084584	0.208873	0.084584	13.5918	0.003325
VPS15	157	163	TSWNWVL			6	905.452	Default State	5	905.941	0.055328	0.202179	0.055328	13.5978	0.006672
VPS15	157	163	TSWNWVL			6	905.452	Default State	50	906.044	0.138643	0.304703	0.138643	13.5935	0.004677
VPS15	157	163	TSWNWVL			6	905.452	Lipids	0	905.739	0	0	0	13.5942	0
VPS15	157	163	TSWNWVL			6	905.452	Lipids	0.005	905.925	0.041506	0.185785	0.041506	13.5823	0.006701
VPS15	157	163	TSWNWVL			6	905.452	Lipids	0.05	905.916	0.050211	0.176838	0.050211	13.5931	0.007408
VPS15	157	163	TSWNWVL			6	905.452	Lipids	0.5	905.959	0.047367	0.220328	0.047367	13.585	0.002132
VPS15	157	163	TSWNWVL			6	905.452	Lipids	5	905.94	0.039176	0.201295	0.039176	13.5839	0.003973
VPS15	157	163	TSWNWVL			6	905.452	Lipids	50	906.023	0.055167	0.284224	0.055167	13.5934	0.003487
VPS15	166	176	DFASFKPTYLP			8	1285.65	Default State	0	1286.21	0	0	0	7.5973	0
VPS15	166	176	DFASFKPTYLP			8	1285.65	Default State	0.005	1286.72	0.076316	0.505174	0.076316	7.56565	0.009954
VPS15	166	176	DFASFKPTYLP			8	1285.65	Default State	0.05	1287.49	0.071887	1.2787	0.071887	7.58021	0.003422
VPS15	166	176	DFASFKPTYLP			8	1285.65	Default State	0.5	1287.75	0.063411	1.5379	0.063411	7.58983	0.007561
VPS15	166	176	DFASFKPTYLP			8	1285.65	Default State	5	1288.91	0.135501	2.69363	0.135501	7.60455	0.009061
VPS15	166	176	DFASFKPTYLP			8	1285.65	Default State	50	1289.83	0.244155	3.62234	0.244155	7.61673	0.002915
VPS15	166	176	DFASFKPTYLP			8	1285.65	Lipids	0	1286.21	0	0	0	7.5973	0
[truncated: 3,461 more rows]
