# Supplementary material for: Membrane characteristics tune activities of endosomal and autophagic human VPS34 complexes
Source: eLife. 2020 Jun 30;9:e58281. doi: 10.7554/eLife.58281 (PMC7326497; doi:10.7554/eLife.58281)
Supplement: Supplementary file 5. [file elife-58281-supp5.xlsx]

## Sheet: Meta Data
Supplementary File 5. Summary of HDX results for complex II with Lipids
Overall
Number of peptides			453
Average Standard Deviation			0.0116679
Timepoints (min)			[0.005, 0.05, 0.5, 5, 50.0]
Significance Threshold			+/-5.0%
Mean Difference			-0.000443048
Number of Repeats			3
Mean Coverage			0.7895
Mean Redundancy			2.0025
Protein			VPS34			Protein			VPS15			Protein			Beclin1			Data Set			UVRAG
Number of peptides			100			Number of peptides			194			Number of peptides			53			Number of peptides			106
Average Standard Deviation			0.010392			Average Standard Deviation			0.0128709			Average Standard Deviation			0.0120012			Average Standard Deviation			0.0114076
Timepoints (min)			[0.005, 0.05, 0.5, 5, 50.0]			Timepoints (min)			[0.005, 0.05, 0.5, 5, 50.0]			Timepoints (min)			[0.005, 0.05, 0.5, 5, 50.0]			Timepoints (min)			[0.005, 0.05, 0.5, 5, 50.0]
Significance Threshold			+/-5.0%			Significance Threshold			+/-5.0%			Significance Threshold			+/-5.0%			Significance Threshold			+/-5.0%
Mean Difference			0.000843355			Mean Difference			-0.00223829			Mean Difference			0.00459506			Mean Difference			-0.00497232
Number of Repeats			3			Number of Repeats			3			Number of Repeats			3			Number of Repeats			3
Coverage			0.759			Coverage			0.786			Coverage			0.816			Coverage			0.797
Redundancy			1.86			Redundancy			2.16			Redundancy			1.82			Redundancy			2.17

## Sheet: Beclin 1 Summary
				Date:			22.11.19		SD	0.0120012															Unhide														for STDEV	Threshold Value=		0.5
Global Color scale				Experiment date:			27.09.16			0.00459536																														Threshold percent		0.02
0.1	0.35	0.7		Protein:			Beclin1																																	t-threshold		2.776
				Instrument:			Waters Synapt G2 Si										-0.2	-0.05	-0.02	0.02	0.05	0.2
																													STDEVS					STDEVS
		Max Frac Deut		0.67		a	Apo					b	Lipids						% Differences (Apo - With Lipids)										a	Apo				b	Lipids					Differences in Daltons (Differences >+/- 0.5Da Highlighted						t-test	*=assumes triplicate values, a p=0.05 test
Start	End	Mod	m/z	#D	RT	0.005	0.05	0.5	5	50		0.005	0.05	0.5	5	50	Start	End	0.005	0.05	0.5	5	50		avg		Start	End	0.005	0.05	0.5	5	50	0.005	0.05	0.5	5	50		0.005	0.05	0.5	5	50		0.005	0.05	0.5	5
13	26		1622.81	12	12.62-12.68	0.05804	0.0960547	0.154262	0.227401	0.391893		0.0571174	0.0798843	0.140865	0.214193	0.369048	13	26	0.001	0.0161704	0.0133971	0.0132076	0.0228456		0.0133242		13	26	0.00880361	0.00407662	0.0119474	0.00913706	0.0213444	0.0124627	0.0129476	0.000727985	0.0217664	0.0161689		0.012	0.194045	0.160766	0.158491	0.274148		0.104732	2.06332	1.93863	0.969068
17	27		1274.67	9	8.28-8.35	0.120695	0.137101	0.155212	0.158013	0.185766		0.108722	0.138503	0.150754	0.16682	0.210607	17	27	0.0119731	-0.00140182	0.00445804	-0.00880746	-0.0248416		-0.00372395		17	27	0.0145924	0.0124371	0.0198463	0.0128927	0.0191308	0.0117833	0.0146046	0.00985771	0.0100896	0.0114776		0.107758	-0.0126164	0.0401224	-0.0792672	-0.223575		1.10569	-0.126574	0.348452	-0.93181
27	59		3627.95	30	7.26-7.30	0.391318	0.406409	0.409974	0.41998	0.432567		0.397535	0.406689	0.421694	0.431959	0.447811	27	59	-0.00621711	-0.000280299	-0.0117204	-0.0119787	-0.0152434		-0.00908798		27	59	0.00328975	0.00543562	0.00277368	0.0109005	0.0167487	0.00713726	0.00555866	0.00896423	0.00820259	0.00397925		-0.186513	-0.00840896	-0.351612	-0.35936	-0.457303		-1.3702	-0.0624457	-2.1634	-1.52086
28	44		1950.05	16	5.49-5.60	0.0993007	0.116957	0.146796	0.144156	0.142515		0.0870271	0.124724	0.151976	0.13407	0.149184	28	44	0.0122735	-0.00776679	-0.00518022	0.0100857	-0.00666884		0.000548675		28	44	0.00777994	0.00839384	0.0103911	0.00804422	0.0134024	0.0112332	0.00929506	0.00738591	0.0162049	0.00843022		0.196376	-0.124269	-0.0828836	0.161372	-0.106701		1.55576	-1.07412	-0.703794	0.965585
42	48		728.455	5	10.13-10.16	0.366221	0.54335	0.580414	0.637232	0.727663		0.357506	0.543518	0.568207	0.613421	0.725703	42	48	0.00871522	-0.00016806	0.0122072	0.0238107	0.0019603		0.00930507		42	48	0.00143881	0.00350269	0.00274478	0.00974119	0.00830985	0.00393194	0.00193075	0.00521194	0.00409373	0.00865493		0.0435761	-0.000840299	0.0610358	0.119054	0.00980149		3.60532	-0.0727797	3.5894	3.90306
42	49		829.503	6	10.17-10.20	0.451173	0.584232	0.623939	0.65183	0.736799		0.416044	0.587168	0.623178	0.646962	0.753933	42	49	0.0351289	-0.00293532	0.000760199	0.00486741	-0.0171336		0.00413751		42	49	0.0130221	0.0243955	0.00351045	0.01629	0.0150455	0.00738085	0.00232313	0.00324826	0.0171137	0.020796		0.210773	-0.0176119	0.00456119	0.0292045	-0.102801		4.06489	-0.207466	0.275304	0.356818
60	72		1481.63	11	9.97-10.00	0.467021	0.49376	0.516492	0.519628	0.511427		0.452688	0.503941	0.509642	0.54026	0.518138	60	72	0.0143327	-0.0101809	0.00685061	-0.0206318	-0.00671085		-0.00326803		60	72	0.0047905	0.0117299	0.0101916	0.00760475	0.0198066	0.00982632	0.00696608	0.00381045	0.018556	0.00776567		0.15766	-0.11199	0.0753567	-0.226949	-0.0738194		2.27088	-1.29257	1.09053	-1.78196
60	79		2220.99	17	9.20-9.24	0.479203	0.541696	0.573735	0.594611	0.595861		0.478891	0.555132	0.585873	0.609853	0.599803	60	79	0.000312291	-0.0134363	-0.0121379	-0.0152421	-0.00394188		-0.00888917		60	79	0.00685768	0.00701835	0.00849306	0.0100856	0.00619991	0.00530149	0.00734004	0.0116085	0.0187501	0.00882037		0.00530896	-0.228416	-0.206345	-0.259115	-0.0670119		0.0624027	-2.2916	-1.46162	-1.23999
71	89		2244.15	15	6.14-6.19	0.0563834	0.0841779	0.127031	0.166615	0.192997		0.0656102	0.0948906	0.141752	0.176655	0.198161	71	89	-0.00922687	-0.0107127	-0.0147204	-0.0100405	-0.00516448		-0.009973		71	89	0.0156304	0.0114836	0.00946169	0.0111532	0.0131037	0.0162913	0.0105576	0.0114259	0.0136075	0.00506388		-0.138403	-0.160691	-0.220806	-0.150607	-0.0774672		-0.707863	-1.18948	-1.71868	-0.988428
73	79		758.379	5	4.79-4.80	0.41467	0.544164	0.616936	0.628917	0.628763		0.373388	0.548087	0.633863	0.64873	0.63765	73	79	0.0412821	-0.00392358	-0.0169272	-0.0198131	-0.00888746		-0.00165385		73	79	0.0182788	0.0194173	0.0214478	0.042091	0.0360176	0.0175254	0.0240203	0.0225206	0.0367376	0.018889		0.20641	-0.0196179	-0.0846358	-0.0990657	-0.0444373		2.82363	-0.220023	-0.942737	-0.61425
89	96		826.325	7	5.17-5.18	0.671962	0.652433	0.665116	0.662518	0.63965		0.661451	0.660101	0.661344	0.658159	0.648309	89	96	0.0105107	-0.00766759	0.00377228	0.00435906	-0.00865928		0.000463028		89	96	0.011281	0.00916077	0.00564606	0.00824755	0.00681834	0.0118079	0.00558316	0.00679168	0.0145307	0.00679211		0.0735746	-0.0536731	0.026406	0.0305134	-0.0606149		1.11478	-1.23794	0.739782	0.451881
89	97		973.393	8	8.69-8.72	0.637695	0.608047	0.631784	0.650771	0.637139		0.632284	0.64044	0.660641	0.649401	0.628834	89	97	0.00541101	-0.0323931	-0.0288573	0.00136978	0.00830504		-0.00923291		89	97	0.00214384	0.0187884	0.0150858	0.0044931	0.00652369	0.0291438	0.0105131	0.0164198	0.0196547	0.0308575		0.0432881	-0.259145	-0.230858	0.0109582	0.0664403		0.320716	-2.606	-2.24158	0.117675
97	112		1654.76	15	12.34-12.37	0.564575	0.556596	0.588265	0.624331	0.610348		0.569066	0.568536	0.596828	0.610829	0.614494	97	112	-0.00449144	-0.0119399	-0.00856299	0.0135018	-0.00414617		-0.00312774		97	112	0.0146203	0.015246	0.0158024	0.0130159	0.00643781	0.0275639	0.0357943	0.0143557	0.0205821	0.0070607		-0.0673716	-0.179099	-0.128445	0.202527	-0.0621925		-0.24933	-0.531551	-0.6947	0.96031
111	122		1371.81	11	7.83-7.92	0.454001	0.636579	0.658733	0.689744	0.68351		0.448918	0.633911	0.678928	0.667003	0.687337	111	122	0.00508236	0.00266784	-0.0201948	0.0227403	-0.00382632		0.00129387		111	122	0.0138621	0.0139525	0.0139047	0.0059137	0.0248152	0.0162365	0.0134707	0.00525387	0.0363261	0.000890773		0.055906	0.0293463	-0.222143	0.250143	-0.0420896		0.412332	0.23826	-2.3532	1.07018
113	122		1144.68	9	6.84-6.92	0.31045	0.483769	0.556766	0.577546	0.563454		0.296523	0.49905	0.562605	0.569973	0.579107	113	122	0.013927	-0.0152804	-0.00583897	0.0075728	-0.0156527		-0.00305446		113	122	0.0158842	0.0145083	0.0152605	0.0168113	0.0202708	0.0163395	0.0165753	0.0170307	0.0204929	0.0189947		0.125343	-0.137524	-0.0525507	0.0681552	-0.140875		1.05856	-1.2015	-0.442258	0.494846
123	137		1677.72	13	11.12-11.16	0.0802323	0.108039	0.127104	0.216794	0.324354		0.0837455	0.108538	0.126762	0.203106	0.342877	123	137	-0.0035132	-0.000498967	0.000341791	0.0136886	-0.0185231		-0.00170096		123	137	0.00854788	0.00539139	0.00497738	0.00256808	0.0143738	0.0102186	0.00266498	0.00434076	0.0118834	0.0256528		-0.0456716	-0.00648657	0.00444328	0.177952	-0.2408		-0.456754	-0.143702	0.0896388	1.95016
123	139		1935.81	15	10.95-10.99	0.0912181	0.115566	0.15051	0.241375	0.375317		0.09487	0.115155	0.162598	0.238658	0.374794	123	139	-0.00365184	0.000410547	-0.0120885	0.00271761	0.000522985		-0.00241783		123	139	0.00718259	0.0047191	0.0112179	0.00812706	0.00895692	0.00870537	0.0108335	0.00740537	0.00859522	0.0118373		-0.0547776	0.00615821	-0.181327	0.0407642	0.00784478		-0.560446	0.0601764	-1.55767	0.397921
125	131		751.329	6	11.78-11.81	0.0158597	0.0258697	0.025248	0.0280537	0.0474692		0.0212968	0.0253383	0.0286182	0.0370985	0.0454007	125	131	-0.00543706	0.000531343	-0.00337015	-0.00904478	0.00206841		-0.00305045		125	131	0.00776269	0.00905796	0.00472711	0.00342637	0.00472587	0.00320622	0.00702612	0.0038199	0.00440945	0.00455299		-0.0326224	0.00318806	-0.0202209	-0.0542687	0.0124104		-1.12127	0.0802817	-0.960456	-2.80542
139	145		794.36	6	10.51-10.55	0.0455948	0.0587522	0.0815667	0.170183	0.208765		0.05881	0.069347	0.0830433	0.167591	0.20932	139	145	-0.0132152	-0.0105948	-0.00147662	0.00259229	-0.000554478		-0.00464975		139	145	0.00844229	0.00359975	0.00369677	0.00419602	0.0034694	0.012392	0.00693333	0.00512313	0.00550622	0.00766294		-0.079291	-0.0635687	-0.0088597	0.0155537	-0.00332687		-1.52652	-2.349	-0.404831	0.648579
152	161		1163.5	9	10.24-10.33	0.10629	0.114207	0.137518	0.19233	0.215594		0.100134	0.131244	0.14219	0.180433	0.205018	152	161	0.00615605	-0.0170368	-0.00467214	0.0118973	0.0105761		0.00138411		152	161	0.00324677	0.00528939	0.00879171	0.0170013	0.00573499	0.00683483	0.00339585	0.0106415	0.0117153	0.00398325		0.0554045	-0.153331	-0.0420493	0.107076	0.0951851		1.40913	-4.6946	-0.586259	0.998061
153	161		1050.42	8	5.77-5.78	0.0451823	0.0857229	0.196471	0.450658	0.598233		0.0457345	0.0846399	0.173566	0.398739	0.587947	153	161	-0.000552239	0.00108302	0.0229056	0.0519194	0.0102862		0.0171284		153	161	0.0097847	0.00371791	0.00900429	0.0189817	0.0096541	0.0113056	0.00531716	0.00717556	0.0168194	0.0197881		-0.00441791	0.00866418	0.183245	0.415355	0.0822896		-0.0639725	0.289123	3.44577	3.54583
159	165		914.397	6	11.04-11.07	0.545052	0.54788	0.565611	0.575266	0.560698		0.53855	0.569867	0.567853	0.579254	0.585256	159	165	0.00650174	-0.0219871	-0.00224179	-0.00398781	-0.024559		-0.00925478		159	165	0.00798632	0.00525174	0.0130614	0.00329129	0.0148363	0.0108679	0.00590522	0.0206413	0.0285597	0.0130164		0.0390104	-0.131922	-0.0134507	-0.0239269	-0.147354		0.834993	-4.81896	-0.158961	-0.240257
166	178		1564.67	12	11.07-11.16	0.0602317	0.0926396	0.115856	0.174475	0.298593		0.0610374	0.107059	0.131678	0.184648	0.299895	166	178	-0.000805721	-0.014419	-0.0158216	-0.0101725	-0.00130149		-0.00850408		166	178	0.0151408	0.0137343	0.0223433	0.0129456	0.0104117	0.0182507	0.0115794	0.0134959	0.0163415	0.0147443		-0.00966866	-0.173028	-0.18986	-0.12207	-0.0156179		-0.0588503	-1.39024	-1.04984	-0.845135
166	179		1692.73	13	12.34-12.37	0.711573	0.720009	0.73652	0.754358	0.753096		0.680962	0.724471	0.771003	0.76497	0.769138	166	179	0.0306103	-0.00446257	-0.0344829	-0.0106118	-0.0160425		-0.00699789		166	179	0.0306648	0.020768	0.01103	0.0196729	0.0154106	0.0228724	0.0151636	0.0388542	0.0162392	0.0219627		0.397934	-0.0580134	-0.448278	-0.137954	-0.208552		1.38591	-0.300584	-1.47876	-0.720525
196	212		2027.08	16	5.49-5.59	0.125843	0.147601	0.166877	0.178059	0.182457		0.134337	0.164528	0.172345	0.181101	0.175831	196	212	-0.0084944	-0.0169276	-0.00546782	-0.00304188	0.00662575		-0.00546119		196	212	0.00804543	0.0164016	0.00525047	0.00508274	0.0126361	0.0114847	0.0107067	0.0109243	0.00466222	0.00771567		-0.13591	-0.270842	-0.0874851	-0.0486701	0.106012		-1.04923	-1.49689	-0.781365	-0.763896
227	236		1320.59	9	10.72-10.77	0.255854	0.296235	0.328144	0.416432	0.509428		0.251196	0.291163	0.328004	0.397019	0.50314	227	236	0.00465788	0.00507264	0.000139801	0.0194131	0.0062874		0.00711416		227	236	0.00742305	0.00572139	0.0088005	0.0188471	0.00958706	0.0134944	0.00986882	0.00188889	0.0136043	0.0125753		0.0419209	0.0456537	0.00125821	0.174718	0.0565866		0.523832	0.77021	0.0269019	1.44658
231	238		1114.56	7	5.82-5.85	0.124301	0.191227	0.225453	0.312513	0.376796		0.115007	0.198506	0.226596	0.299452	0.361488	231	238	0.00929318	-0.00727868	-0.00114328	0.0130612	0.015307		0.00584789		231	238	0.00995011	0.0144083	0.0174217	0.0192288	0.00944115	0.0225684	0.0145026	0.016806	0.0251145	0.014352		0.0650522	-0.0509507	-0.00800299	0.0914284	0.107149		0.652607	-0.616687	-0.0818053	0.715218
244	261		2168.03	17	11.31-11.34	0.0181924	0.0217854	0.023214	0.0456929	0.135693		0.0191924	0.0179174	0.0256795	0.0416391	0.121666	244	261	-0.000999912	0.00386804	-0.0024655	0.00405382	0.0140267		0.00369663		244	261	0.00229491	0.00437076	0.000873134	0.00493626	0.0163655	0.0063568	0.00389359	0.00548297	0.00540536	0.00830746		-0.0169985	0.0657567	-0.0419134	0.0689149	0.238454		-0.25626	1.14455	-0.76915	0.959191
262	270		1092.64	8	7.00-7.07	0.213694	0.221373	0.31349	0.394086	0.405844		0.155825	0.232369	0.272028	0.280622	0.325311	262	270	0.0578685	-0.0109959	0.0414621	0.113464	0.0805328		0.0564663		262	270	0.00846754	0.0375291	0.0124013	0.0116252	0.010181	0.0230201	0.0162431	0.0435319	0.0394653	0.0122778		0.462948	-0.0879672	0.331697	0.90771	0.644263		4.08638	-0.465734	1.58657	4.77676
275	287		1510.72	12	8.55-8.63	0.0868078	0.108192	0.161092	0.219162	0.241348		0.10125	0.137049	0.159818	0.189884	0.225759	275	287	-0.0144424	-0.028857	0.00127425	0.0292784	0.0155887		0.000568383		275	287	0.0153291	0.0158622	0.0113863	0.00800162	0.00649602	0.00631567	0.00202836	0.0107801	0.0120251	0.0232517		-0.173309	-0.346284	0.015291	0.35134	0.187064		-1.50882	-3.12555	0.140758	3.51091
281	294		1632.9	12	4.95-4.98	0.39599	0.435584	0.463618	0.444313	0.440976		0.416034	0.431635	0.47638	0.47337	0.455613	281	294	-0.0200443	0.00394876	-0.0127622	-0.0290575	-0.0146371		-0.0145104		281	294	0.00826057	0.00377811	0.0105163	0.027133	0.0205022	0.0138775	0.0338209	0.0244096	0.00576343	0.0209153		-0.240531	0.0473851	-0.153146	-0.34869	-0.175645		-2.14971	0.200975	-0.831676	-1.81442
288	300		1555.87	10	11.96-12.11	0.160182	0.153148	0.220223	0.36472	0.329415		0.118526	0.136245	0.152751	0.198882	0.238098	288	300	0.0416563	0.0169033	0.0674715	0.165838	0.0913172		0.0766373		288	300	0.0135158	0.0283197	0.0146304	0.0273693	0.0138637	0.0210036	0.0145542	0.043643	0.0496025	0.0396033		0.416563	0.169033	0.674715	1.65838	0.913172		2.88874	0.919495	2.53887	5.07023
290	302		1495.79	10	6.82-6.86	0.696628	0.705324	0.731877	0.755516	0.754954		0.681856	0.73746	0.735713	0.758696	0.738888	290	302	0.0147722	-0.032136	-0.00383612	-0.0031797	0.0160652		-0.00166287		290	302	0.0166733	0.00109627	0.00537642	0.0359837	0.0358407	0.0258728	0.0279316	0.0242673	0.0235179	0.0286234		0.147722	-0.32136	-0.0383612	-0.031797	0.160652		0.831266	-1.99123	-0.267317	-0.128117
306	312		774.414	6	11.28-11.33	-0.0084796	0.0178664	0.0184017	0.0249699	0.0158624		-0.0022806	0.00597612	0.00719154	0.00792164	-0.000411443	306	312	-0.006199	0.0118903	0.0112102	0.0170483	0.0162739		0.0100447		306	312	0.0141654	0.00358408	0.00664303	0.00307239	0.00410398	0.0062306	0.00492114	0.00486393	0.019091	0.0138239		-0.037194	0.0713418	0.0672612	0.10229	0.0976433		-0.693823	3.38284	2.3583	1.52707
326	339		1765.91	12	9.27-9.40	0.0304748	0.0362425	0.0684527	0.139304	0.178842		0.0259743	0.0366415	0.0534153	0.101083	0.146035	326	339	0.0045005	-0.000399005	0.0150374	0.0382211	0.0328066		0.0180333		326	339	0.00233619	0.0063056	0.00603221	0.0102317	0.00420361	0.0105461	0.0115782	0.00861231	0.0256801	0.0115868		0.054006	-0.00478806	0.180449	0.458654	0.393679		0.721647	-0.0524196	2.47706	2.39482
339	346		892.462	7	5.22-5.24	0.150384	0.223152	0.252841	0.328923	0.387157		0.149275	0.228524	0.254652	0.332046	0.376256	339	346	0.00110917	-0.00537271	-0.00181087	-0.00312367	0.0109015		0.000340682		339	346	0.000700853	0.00578763	0.0104309	0.0113316	0.00389915	0.00587889	0.00326802	0.00789744	0.0139426	0.0121058		0.00776418	-0.037609	-0.0126761	-0.0218657	0.0763104		0.324488	-1.4001	-0.239734	-0.301133
340	359		2243.14	18	11.29-11.38	0.424388	0.441523	0.499984	0.537837	0.546039		0.3897	0.435075	0.477582	0.463267	0.494697	340	359	0.0346876	0.00644793	0.0224022	0.0745701	0.0513418		0.0378899		340	359	0.00471368	0.0237687	0.00898831	0.00741335	0.00828333	0.0218736	0.00386609	0.0115334	0.0517182	0.0256503		0.624376	0.116063	0.40324	1.34226	0.924152		2.68508	0.463773	2.65362	2.47209
351	357		712.333	6	8.88-8.92	0.0291562	0.0156948	0.0259828	0.0560425	0.0835771		0.0406142	0.048005	0.067248	0.054952	0.0974808	351	357	-0.011458	-0.0323102	-0.0412652	0.00109055	-0.0139037		-0.0195693		351	357	0.025109	0.00613881	0.00985697	0.00206642	0.010254	0.0219254	0.018409	0.0123642	0.0153455	0.00795672		-0.0687478	-0.193861	-0.247591	0.00654328	-0.0834224		-0.595354	-2.88386	-4.52008	0.121989
354	374		2473.18	20	9.92-9.99	0.405512	0.43863	0.468704	0.50222	0.531241		0.404718	0.459809	0.489072	0.531829	0.550298	354	374	0.000793358	-0.0211781	-0.0203683	-0.029609	-0.019057		-0.0178838		354	374	0.00634881	0.00746724	0.00932985	0.0149956	0	0.00784858	0.0152154	0.0068294	0.0140287	0.00772239		0.0158672	-0.423561	-0.407366	-0.592179	-0.38114		0.136121	-2.16423	-3.0512	-2.49745
360	369		1310.56	9	10.23-10.32	0.0617566	0.0638769	0.0897161	0.168488	0.179897		0.0411158	0.0743698	0.0736176	0.137702	0.153215	360	369	0.0206408	-0.0104929	0.0160985	0.0307854	0.0266821		0.0167428		360	369	0.00341277	0.00933814	0.00823416	0.0112546	0.00461376	0.00793798	0.00946501	0.00397297	0.00982786	0.0091864		0.185767	-0.0944358	0.144887	0.277069	0.240139		4.13759	-1.36688	3.04986	3.56868
360	370		1409.63	10	10.74-10.84	0.0791925	0.0955181	0.119571	0.190056	0.20944		0.0886246	0.106232	0.142569	0.178146	0.197783	360	370	-0.00943209	-0.0107136	-0.022997	0.01191	0.0116567		-0.00391519		360	370	0.00553687	0.00162552	0.00577209	0.000258358	0.00161164	0.00701045	0.0101982	0.0102069	0.0069491	0.0127709		-0.0943209	-0.107136	-0.22997	0.1191	0.116567		-1.82877	-1.7969	-3.39692	2.96649
362	372		1294.59	10	8.28-8.34	0.312378	0.320844	0.331826	0.368779	0.428185		0.304563	0.322321	0.346391	0.366286	0.434141	362	372	0.00781478	-0.00147746	-0.0145651	0.00249254	-0.00595627		-0.0023383		362	372	0.010719	0.0134609	0.00980582	0.0057509	0.0016097	0.00348119	0.00811597	0.00387896	0.00471985	0.00778478		0.0781478	-0.0147746	-0.145651	0.0249254	-0.0595627		1.20102	-0.162807	-2.39232	0.580289
372	382		1385.64	10	10.11-10.16	0.248138	0.285013	0.314991	0.432949	0.533918		0.243976	0.301592	0.356077	0.447043	0.552837	372	382	0.00416194	-0.0165794	-0.0410855	-0.0140931	-0.0189187		-0.017303		372	382	0.0102903	0.00183552	0.00514806	0.0016497	0.00221642	0.00461179	0.00927522	0.00640701	0.00441836	0.011406		0.0416194	-0.165794	-0.410855	-0.140931	-0.189187		0.639268	-3.03713	-8.65823	-5.17568
378	391		1729.82	13	7.34-7.38	0.234058	0.306657	0.344595	0.415404	0.461868		0.222762	0.293282	0.342184	0.409866	0.458781	378	391	0.011296	0.0133746	0.00241125	0.00553881	0.00308657		0.00714145		378	391	0.00363111	0.00707933	0.0138661	0.00231561	0.00602067	0.00918312	0.00297233	0.0103016	0.0230148	0.00818255		0.146848	0.17387	0.0313463	0.0720045	0.0401254		1.9813	3.01713	0.241774	0.414746
379	390		1498.75	11	7.32-7.38	0.267153	0.284324	0.305354	0.356235	0.386649		0.255575	0.283281	0.296442	0.320781	0.359213	379	390	0.0115771	0.00104247	0.00891248	0.0354545	0.0274357		0.0168845		379	390	0.00600149	0.00782293	0.0128389	0.00680014	0.0328041	0.0058057	0.00341085	0.00992307	0.00640434	0.00752252		0.127348	0.0114672	0.0980373	0.39	0.301793		2.40142	0.211574	0.951326	6.57402
383	392		1181.6	9	5.64-5.66	0.126604	0.132781	0.155731	0.214279	0.327142		0.110358	0.14451	0.164114	0.213747	0.305631	383	392	0.0162463	-0.0117292	-0.00838325	0.000532504	0.0215111		0.00363549		383	392	0.00403367	0.00116235	0.00960216	0.00633416	0.0102051	0.00294975	0.00274129	0.00948756	0.0078995	0.00317098		0.146216	-0.105563	-0.0754493	0.00479254	0.1936		5.63108	-6.82292	-1.07567	0.0910901
388	408		2415.18	19	6.14-6.18	0.0416957	0.0544455	0.085417	0.126366	0.144669		0.0399522	0.0539581	0.0861446	0.124114	0.133942	388	408	0.00174352	0.000487353	-0.000727651	0.0022524	0.0107266		0.00289645		388	408	0.00466049	0.00703244	0.00284965	0.00910746	0.00294336	0.0064099	0.001585	0.00247235	0.0042751	0.00368869		0.0331269	0.0092597	-0.0138254	0.0427955	0.203806		0.381051	0.117095	-0.334069	0.387764
397	408		1247.61	11	8.79-8.86	0.292301	0.493459	0.520001	0.545777	0.577358		0.287403	0.485174	0.531774	0.551171	0.584757	397	408	0.00489878	0.0082844	-0.0117739	-0.00539362	-0.00739837		-0.00227655		397	408	0.0127996	0.0183634	0.0147339	0.00569905	0.00542252	0.0136955	0.0107925	0.0155503	0.015029	0.0104547		0.0538866	0.0911284	-0.129513	-0.0593299	-0.0813821		0.452636	0.67366	-0.951969	-0.581214
397	412		1535.72	15	5.49-5.51	0.298639	0.320852	0.360234	0.401336	0.439477		0.253519	0.310268	0.327618	0.333001	0.386386	397	412	0.0451206	0.0105845	0.0326159	0.0683349	0.053091		0.0419494		397	412	0.00472408	0.0224645	0.0077602	0.0139183	0.0144417	0.0251471	0.00767801	0.0133564	0.0363653	0.0285668		0.676809	0.158767	0.489239	1.02502	0.796366		3.05434	0.772223	3.65714	3.03971
397	413		1698.78	16	6.74-6.77	0.296564	0.32529	0.355413	0.414782	0.469538		0.266215	0.317463	0.341012	0.325543	0.407973	397	413	0.0303492	0.00782677	0.014401	0.0892391	0.0615646		0.0406761		397	413	0.00322966	0.0185764	0.00856679	0.00921343	0.00882603	0.0101155	0.0198889	0.0139185	0.0408064	0.0257284		0.485587	0.125228	0.230416	1.42783	0.985033		4.95042	0.498123	1.52618	3.69479
413	419		886.467	6	9.29-9.35	0.15617	0.147163	0.165483	0.250755	0.431086		0.129929	0.170846	0.196345	0.202869	0.322686	413	419	0.0262405	-0.0236821	-0.0308622	0.0478861	0.108401		0.0255966		413	419	0.0166386	0.0415321	0.0204624	0.0169219	0.0268617	0.0313114	0.0182577	0.0420595	0.0196525	0.0272493		0.157443	-0.142093	-0.185173	0.287316	0.650404		1.28181	-0.90413	-1.14286	3.19816
420	431		1480.74	11	11.04-11.11	0.0370512	0.0566787	0.091627	0.12443	0.133526		0.0367802	0.0613852	0.089987	0.0979858	0.101996	420	431	0.000270963	-0.00470651	0.00164003	0.0264441	0.0315301		0.0110357		420	431	0.0044555	0.00406336	0.0115613	0.00512212	0.0206929	0.00747517	0.00206757	0.00834735	0.00295183	0.00690896		0.0029806	-0.0517716	0.0180403	0.290885	0.346831		0.053931	-1.78804	0.199204	7.74764
432	440		1075.6	8	12.29-12.36	-0.00709459	0.00171735	-0.00286978	-0.0144185	-0.000286381		0.00182332	0.0135174	0.01807	0.00696306	0.00528097	432	440	-0.00891791	-0.0118	-0.0209397	-0.0213815	-0.00556735		-0.0137213		432	440	0.0184576	0.00414963	0.00805802	0.00372631	0.00494907	0.0189996	0.0107121	0.00985056	0.00927687	0.0232761		-0.0713433	-0.0944	-0.167518	-0.171052	-0.0445388		-0.583119	-1.77913	-2.84984	-3.7044
[truncated: 8 more columns]

## Sheet: UVRAG Summary
				Date:			22.11.19		SD	0.0114076															Unhide														for STDEV	Threshold Value=		0.5
Global Color scale				Experiment date:			27.09.16			-0.0049725																														Threshold percent		0.02
0.1	0.35	0.7		Protein:			UVRAG																																	t-threshold		2.776
				Instrument:			Waters Synapt G2 Si										-0.1	-0.05	-0.02	0.02	0.05	0.1
																													STDEVS					STDEVS
		Max Frac Deut		0.67		a	Apo					b	Lipids						% Differences (Apo - With Lipids)										a	Apo				b	Lipids					Differences in Daltons (Differences >+/- 0.5Da Highlighted						t-test	*=assumes triplicate values, a p=0.05 test
Start	End	Mod	m/z	#D	RT	0.005	0.05	0.5	5	50		0.005	0.05	0.5	5	50	Start	End	0.005	0.05	0.5	5	50		avg		Start	End	0.005	0.05	0.5	5	50	0.005	0.05	0.5	5	50		0.005	0.05	0.5	5	50		0.005	0.05	0.5	5
2	14		1184.59	10	11.85-11.93	0.0261357	0.033729	0.0628755	0.0881255	0.106063		0.0160421	0.0160143	0.0267733	0.0809348	0.0780415	2	14	0.01	0.0177146	0.0361022	0.00719075	0.0280215		0.0198058		2	14	0.00907299	0.00361075	0.00355478	0.00432015	0.00709761	0.0020994	0.00544836	0.0117433	0.0131893	0.0100643		0.1	0.177146	0.361022	0.0719075	0.280215		1.87728	4.69425	5.09644	0.897395
16	30		1303.71	10	11.29-11.31	0.289628	0.333426	0.380069	0.427861	0.4944		0.282802	0.343011	0.389164	0.43327	0.513069	16	30	0.00682627	-0.00958463	-0.00909567	-0.0054094	-0.0186691		-0.00718651		16	30	0	0.00453373	0	0.00690701	0.0293252	0.00513313	0.00548299	0.0106633	0.0076794	9.92537e-05		0.0682627	-0.0958463	-0.0909567	-0.054094	-0.186691		2.30336	-2.33337	-1.47742	-0.907127
20	29		910.51	7	4.92-4.95	0.233264	0.397626	0.447109	0.46342	0.452393		0.200617	0.39789	0.430219	0.492424	0.450411	20	29	0.0326478	-0.000264179	0.0168896	-0.0290043	0.00198209		0.00445019		20	29	0.00398358	0.013655	0.00218081	0.0136196	0.00416269	0.0148399	0.0080806	0.0163175	0.0510311	0.0096435		0.228534	-0.00184925	0.118227	-0.20303	0.0138746		3.68023	-0.0288383	1.77697	-0.951144
28	35		908.531	7	8.55-8.62	0.44158	0.506005	0.541252	0.550565	0.534911		0.422172	0.509622	0.546781	0.551237	0.557695	28	35	0.0194085	-0.00361684	-0.00552814	-0.000672281	-0.0227844		-0.00263864		28	35	0.0103207	0.0120529	0.0108109	0.0114814	0.0123748	0.0209354	0.0157776	0.0131139	0.0106279	0.0207021		0.13586	-0.0253179	-0.038697	-0.00470597	-0.159491		1.44023	-0.315522	-0.563385	-0.0744264
32	47		2039.15	14	5.87-5.94	0.117064	0.189568	0.279447	0.326186	0.408178		0.115419	0.187266	0.290423	0.29915	0.438459	32	47	0.00164542	0.00230192	-0.0109768	0.0270357	-0.0302812		-0.00205499		32	47	0.0165792	0.00243753	0.00318188	0.0182122	0.0142103	0.0101788	0.00918571	0.0125769	0.00776876	0.0188081		0.0230358	0.0322269	-0.153675	0.3785	-0.423937		0.146493	0.419528	-1.46551	2.36502
33	45		1631.95	11	6.41-6.54	0.0504556	0.0602265	0.101254	0.144912	0.164043		0.0567583	0.0639685	0.0789609	0.125469	0.149999	33	45	-0.00630271	-0.00374206	0.0222929	0.0194429	0.0140444		0.00914708		33	45	0.00936011	0.0076232	0.0112773	0.0250315	0.0359773	0.00528223	0.0126833	0.0229019	0.0201809	0.0031228		-0.0693299	-0.0411627	0.245222	0.213872	0.154488		-1.01571	-0.437996	1.51256	1.04736
50	62		1504.85	12	7.36-7.43	0.271754	0.311083	0.32183	0.370741	0.39172		0.271635	0.324197	0.331447	0.345756	0.379703	50	62	0.000119154	-0.0131137	-0.00961692	0.0249853	0.0120164		0.00287806		50	62	0.00238657	0.00859415	0.0105369	0.000222388	0.00210796	0.0197303	0.0041704	0.00563172	0.0111958	0.0150264		0.00142985	-0.157364	-0.115403	0.299824	0.144197		0.0103844	-2.37774	-1.39418	3.86461
53	62		1163.66	9	7.55-7.61	0.352216	0.396362	0.406579	0.42979	0.444887		0.324735	0.419036	0.430092	0.451793	0.474063	53	62	0.0274814	-0.0226738	-0.0235126	-0.0220025	-0.029176		-0.0139767		53	62	0.0236556	0.00970896	0.00383914	0.00940166	0.00418806	0.0159592	0	0.00865075	0.0172118	0.00126899		0.247333	-0.204064	-0.211613	-0.198022	-0.262584		1.66806	-4.04494	-4.30298	-1.94315
53	64		1379.74	11	7.33-7.39	0.261595	0.305279	0.336938	0.347124	0.357524		0.270321	0.322546	0.346877	0.358198	0.393012	53	64	-0.00872551	-0.0172666	-0.00993894	-0.0110745	-0.0354885		-0.0164988		53	64	0.00815319	0.0121764	0.0105299	0.00692266	0.00832347	0.00683582	0.0128638	0.00629349	0.00690014	0.0113879		-0.0959806	-0.189933	-0.109328	-0.121819	-0.390373		-1.42044	-1.68843	-1.40331	-1.96247
63	76		1670.81	13	11.65-11.70	0.533982	0.547992	0.556768	0.543087	0.56323		0.514544	0.557038	0.579695	0.567995	0.576872	63	76	0.0194383	-0.0090465	-0.0229273	-0.0249087	-0.0136424		-0.0102173		63	76	0.017176	0.0166896	0.0178007	0.0185049	0.0161338	0.0418375	0.0150272	0.0183357	0.018258	0.0282811		0.252699	-0.117604	-0.298055	-0.323813	-0.177351		0.744443	-0.697705	-1.55395	-1.65962
71	79		1100.53	8	5.96-6.00	0.386149	0.636074	0.669679	0.674315	0.674074		0.382718	0.642404	0.682105	0.691738	0.677607	71	79	0.00343078	-0.0063306	-0.0124261	-0.0174231	-0.00353302		-0.00725642		71	79	0.00185504	0.0146515	0.00704049	0.0144155	0.0076334	0.00448843	0.00699123	0.0109554	0.0111198	0.003175		0.0274463	-0.0506448	-0.099409	-0.139385	-0.0282642		1.22353	-0.675428	-1.65271	-1.65758
86	99		1690.89	12	10.90-11.38	0.144758	0.225325	0.247552	0.370119	0.476975		0.139962	0.236613	0.286974	0.373773	0.497356	86	99	0.0047959	-0.0112882	-0.0394223	-0.00365398	-0.0203816		-0.01399		86	99	0.00906667	0.00658371	0.0101563	0.000992662	0.0129447	0.00812998	0.01115	0.00691294	0.00749863	0.00785858		0.0575507	-0.135458	-0.473067	-0.0438478	-0.244579		0.682116	-1.50994	-5.55776	-0.836705
96	109		1566.75	12	12.67-12.73	0.0259759	0.0372164	0.0744121	0.107012	0.122503		0.0111447	0.0395348	0.0663725	0.100273	0.134374	96	109	0.0148312	-0.00231841	0.00803955	0.00673881	-0.0118708		0.00308408		96	109	0.0225389	0.0234259	0.0205101	0.0171445	0.0244047	0.0150331	0.0237571	0.0267988	0.0212641	0.0220649		0.177975	-0.0278209	0.0964746	0.0808657	-0.142449		0.948179	-0.120357	0.412631	0.427313
99	106		948.497	6	11.43-11.50	0.281359	0.52044	0.571455	0.577835	0.568096		0.272272	0.518415	0.565524	0.586237	0.584073	99	106	0.00908706	0.00202488	0.00593109	-0.00840249	-0.0159771		-0.00146731		99	106	0.00633632	0.00564328	0.0201204	0.00711642	0.00897711	0.0144498	0.0122575	0.0108993	0.019941	0.016602		0.0545224	0.0121493	0.0355866	-0.0504149	-0.0958627		0.997547	0.259904	0.448937	-0.687368
100	112		1393.64	11	9.74-9.79	0.286465	0.464639	0.571309	0.671615	0.698701		0.281625	0.454916	0.566015	0.677117	0.703392	100	112	0.00484084	0.0097228	0.00529444	-0.00550176	-0.00469009		0.00193324		100	112	0.00390611	0.0115543	0.0225788	0.0133666	0.0135457	0.0024692	0.0149406	0.0322708	0.00673976	0.0101741		0.0532493	0.106951	0.0582388	-0.0605194	-0.051591		1.81441	0.891635	0.232833	-0.636576
107	113		758.303	6	10.38-10.40	0.115355	0.192914	0.295214	0.471692	0.528853		0.103563	0.194608	0.307824	0.483219	0.530684	107	113	0.0117923	-0.00169353	-0.01261	-0.0115274	-0.00183085		-0.00317388		107	113	0.00217637	0.00297214	0.00385174	0.00175149	0.00553458	0.0029709	0.00492711	0.0013194	0.00946592	0.00663507		0.0707537	-0.0101612	-0.0756597	-0.0691642	-0.0109851		5.54605	-0.50977	-5.36444	-2.07404
112	130		2252.21	18	12.69-12.73	0.170865	0.196984	0.203952	0.24314	0.303572		0.168361	0.197634	0.210767	0.238422	0.304532	112	130	0.0025039	-0.000649751	-0.00681434	0.00471791	-0.000960116		-0.000240481		112	130	0.0044267	0.00426567	0.00265514	0.00297048	0.00536559	0.00339851	0.00468607	0.00669967	0.00355871	0.00664801		0.0450701	-0.0116955	-0.122658	0.0849224	-0.0172821		0.777104	-0.177597	-1.63777	1.76283
113	127		1793.99	14	11.72-11.83	0.0926697	0.186783	0.289395	0.318442	0.337307		0.0871717	0.177541	0.293233	0.33149	0.343243	113	127	0.00549797	0.00924158	-0.00383838	-0.0130473	-0.00593593		-0.00161642		113	127	0.00600522	0.00134392	0.00356226	0.0126624	0.00650128	0.00649232	0.00310576	0.0116143	0.00850437	0.00593753		0.0769716	0.129382	-0.0537373	-0.182663	-0.083103		1.07677	4.73008	-0.547259	-1.48157
114	124		1242.72	10	9.20-9.28	0.123613	0.176057	0.24438	0.281514	0.281356		0.113577	0.182482	0.253981	0.289371	0.29155	114	124	0.0100361	-0.00642522	-0.00960045	-0.00785716	-0.0101936		-0.00480806		114	124	0.013396	0.014776	0.0168764	0.0145127	0.0136816	0.0206712	0.0167612	0.0156115	0.0193161	0.0147575		0.100361	-0.0642522	-0.0960045	-0.0785716	-0.101936		0.705702	-0.498061	-0.723297	-0.563275
114	128		1760.01	14	12.13-12.24	0.0872673	0.178539	0.307655	0.344097	0.365648		0.088786	0.181875	0.308713	0.344379	0.372913	114	128	-0.00151876	-0.00333571	-0.0010581	-0.00028209	-0.00726439		-0.00269181		114	128	0.00799328	0.00506738	0.00504403	0.00369819	0.00592985	0.0074806	0.0125251	0.00722687	0.00652463	0.00392249		-0.0212627	-0.0467	-0.0148134	-0.00394925	-0.101701		-0.240286	-0.427614	-0.207952	-0.0651473
136	152		1984	16	8.36-8.41	0.257245	0.403263	0.435249	0.467851	0.540467		0.255553	0.408026	0.447807	0.481143	0.548932	136	152	0.00169235	-0.00476287	-0.0125579	-0.0132921	-0.00846483		-0.00747707		136	152	0.00581465	0.0060139	0.00588853	0.00538265	0.00704674	0.0106242	0.00891558	0.00614394	0.0137521	0.00553778		0.0270776	-0.076206	-0.200927	-0.212673	-0.135437		0.242026	-0.767094	-2.55589	-1.55895
139	152		1698.87	13	5.85-5.88	0.2104	0.333183	0.359661	0.396402	0.434562		0.192389	0.340981	0.371892	0.409347	0.46818	139	152	0.0180111	-0.00779828	-0.012231	-0.012945	-0.0336183		-0.00971628		139	152	0.00145419	0.0109606	0.0105334	0.00140344	0.0207976	0.0246879	0.0100332	0.0130156	0.00244294	0.00697956		0.234145	-0.101378	-0.159003	-0.168285	-0.437037		1.26143	-0.908992	-1.26522	-7.95826
141	159		2180.12	18	7.16-7.21	0.0528027	0.0660179	0.0860201	0.131449	0.21841		0.050822	0.0745205	0.0930918	0.132237	0.229425	141	159	0.00198068	-0.00850257	-0.00707164	-0.000787894	-0.0110153		-0.00507935		141	159	0.0155342	0.00973483	0.0100686	0.0102517	0.0119196	0.0114847	0.0127807	0.0103356	0.00970216	0.00995614		0.0356522	-0.153046	-0.12729	-0.0141821	-0.198276		0.177581	-0.916656	-0.848868	-0.0966836
152	163		1360.64	11	11.66-11.72	0.249988	0.281649	0.299853	0.325991	0.340241		0.251778	0.305898	0.306282	0.32363	0.348672	152	163	-0.00178982	-0.0242497	-0.0064289	0.00236133	-0.00843107		-0.00770763		152	163	0	0.0112912	0.0121296	0.00631452	0.00475183	0.00688168	0	0.00501723	0.0046848	0.00387978		-0.0196881	-0.266746	-0.0707179	0.0259746	-0.0927418		-0.450481	-3.71986	-0.848312	0.520177
153	159		791.43	6	11.74-11.78	0.142527	0.196414	0.18876	0.202906	0.204977		0.148481	0.19928	0.205317	0.221802	0.209517	153	159	-0.00595373	-0.00286642	-0.0165567	-0.0188963	-0.00454055		-0.00976274		153	159	0.00592015	0.00481418	0.00375423	0.00646095	0.00538284	0.00399478	0.00700274	0.0163799	0.0112152	0.0133649		-0.0357224	-0.0171985	-0.0993403	-0.113378	-0.0272433		-1.4439	-0.584235	-1.7065	-2.52871
153	174		2433.15	20	11.50-11.58	0.238032	0.26042	0.289098	0.330266	0.35177		0.243139	0.269481	0.304006	0.337111	0.363578	153	174	-0.00510687	-0.0090609	-0.0149073	-0.00684425	-0.0118078		-0.00954542		153	174	0.00224881	0.00245709	0.00888679	0.00400448	0.00396194	0.00706776	0.0137016	0.00676358	0.00688478	0.00626515		-0.102137	-0.181218	-0.298146	-0.136885	-0.236155		-1.19259	-1.12742	-2.31201	-1.4884
156	172		1874.83	15	7.24-7.28	0.245318	0.302907	0.341043	0.416923	0.46697		0.247075	0.319072	0.336678	0.413062	0.44714	156	172	-0.00175692	-0.016165	0.00436438	0.0038609	0.0198304		0.00202677		156	172	0.000303881	0.00937662	0.00480259	0.00320597	0.00901075	0.0120777	0	0.00357174	0.0153627	0.0234664		-0.0263537	-0.242475	0.0654657	0.0579134	0.297457		-0.251878	-2.986	1.26301	0.426113
166	184		2219.15	18	5.49-5.58	0.106209	0.135133	0.151685	0.163844	0.176735		0.113835	0.129825	0.159254	0.163822	0.182209	166	184	-0.0076257	0.00530746	-0.00756857	2.18905e-05	-0.00547446		-0.00306788		166	184	0.0136475	0.0120717	0.0123724	0.0137587	0.0148089	0.0142495	0.01201	0.0130056	0.0123994	0.0130008		-0.137263	0.0955343	-0.136234	0.00039403	-0.0985403		-0.669417	0.539852	-0.730295	0.0020471
180	186		819.366	6	7.35-7.37	0.464245	0.65539	0.688448	0.689174	0.690424		0.45086	0.663152	0.696346	0.706997	0.706774	180	186	0.0133856	-0.00776269	-0.00789801	-0.0178229	-0.0163502		-0.00728965		180	186	0.00714677	0.00689726	0.00411294	0.00725423	0.00798035	0.00703657	0.00720522	0.0052995	0.0132279	0.00751741		0.0803134	-0.0465761	-0.0473881	-0.106937	-0.0981015		2.31165	-1.348	-2.03924	-2.04622
181	194		1686.75	13	10.69-10.74	0.212637	0.316965	0.361812	0.460679	0.553575		0.213046	0.328131	0.378891	0.467019	0.564675	181	194	-0.000409644	-0.0111667	-0.0170789	-0.00634007	-0.0111003		-0.00921913		181	194	0.00461676	0.00250953	0.0083845	0.00927566	0.00683226	0.00627899	0	0	0	0		-0.00532537	-0.145167	-0.222025	-0.0824209	-0.144304		-0.0910394	-7.70714	-3.52811	-1.18389
195	204		1196.67	9	7.10-7.17	0.0696163	0.0637814	0.0555522	0.077892	0.12954		0.0736854	0.0799164	0.0769327	0.101778	0.131319	195	204	-0.00406915	-0.016135	-0.0213804	-0.0238864	-0.00177877		-0.01345		195	204	0.0196401	0.0151735	0.0151735	0.0176202	0.0169872	0.00825456	0.0161323	0.0174207	0.00993201	0.0142292		-0.0366224	-0.145215	-0.192424	-0.214978	-0.016009		-0.330825	-1.26187	-1.60296	-2.04544
195	205		1267.71	10	7.01-7.09	0.0563666	0.0921081	0.0650601	0.0829043	0.158713		0.0609955	0.0702157	0.0698104	0.0873033	0.162568	195	205	-0.00462896	0.0218924	-0.0047503	-0.00439896	-0.00385493		0.000851851		195	205	0.0170093	0.0412616	0.0121419	0.0148073	0.0125249	0.0263587	0.0123461	0.0116661	0.0165234	0.0155521		-0.0462896	0.218924	-0.047503	-0.0439896	-0.0385493		-0.255579	0.880416	-0.488636	-0.343403
197	204		996.552	7	5.43-5.49	0.0397861	0.0450864	0.0493638	0.0600017	0.111322		0.0581356	0.0678921	0.0596362	0.0675207	0.100591	197	204	-0.0183495	-0.0228058	-0.0102725	-0.00751898	0.0107307		-0.0096432		197	204	0.0150913	0.0110475	0.00594371	0.00737761	0.00754606	0.0149623	0.00852687	0.0132256	0.0101742	0.0089516		-0.128446	-0.15964	-0.0719075	-0.0526328	0.0751149		-1.49555	-2.83048	-1.22709	-1.03626
198	204		883.468	6	4.45-4.49	0.0636739	0.0456592	0.0360388	0.0482229	0.0998525		0.0557104	0.0540604	0.0398776	0.058453	0.1012	198	204	0.00796343	-0.00840124	-0.00383881	-0.0102301	-0.00134801		-0.00317095		198	204	0.0168291	0.0217057	0.0201087	0.0161361	0.00068209	0.0185002	0.0133219	0.00552114	0.0125246	0.0275876		0.0477806	-0.0504075	-0.0230328	-0.0613806	-0.00808806		0.551512	-0.571363	-0.318853	-0.867457
200	212		1483.78	12	5.39-5.41	0.0425613	0.0659026	0.0646826	0.145482	0.385492		0.0485256	0.044993	0.060945	0.157966	0.399008	200	212	-0.0059643	0.0209096	0.00373756	-0.012484	-0.0135157		-0.00146336		200	212	0.012268	0.00910435	0.0133979	0.0159852	0.0215571	0.0286614	0.0269905	0.00962562	0.00303806	0.026176		-0.0715716	0.250915	0.0448507	-0.149807	-0.162188		-0.331353	1.27143	0.39241	-1.32889
205	214		1115.64	9	6.22-6.24	0.0486811	0.0537111	0.0746658	0.187939	0.518999		0.0480018	0.0578456	0.0622138	0.195237	0.513812	205	214	0.00067927	-0.00413449	0.0124521	-0.00729751	0.00518706		0.00137728		205	214	0.0139008	0.0169078	0.0178109	0.00808955	0.00626915	0.0135297	0.0147867	0.0060743	0.00607463	0.0105798		0.00611343	-0.0372104	0.112069	-0.0656776	0.0466836		0.0606519	-0.318818	1.1461	-1.24942
205	222		2042.15	17	8.44-8.47	0.054582	0.0667907	0.0686004	0.149836	0.418402		0.0563568	0.0712808	0.0762373	0.153151	0.42905	205	222	-0.0017748	-0.00449008	-0.00763687	-0.0033158	-0.0106483		-0.00557317		205	222	0.0118592	0.010196	0.00681642	0.00346032	0.0168353	0.00521229	0.00454732	0.0096691	0.0119083	0.0119185		-0.0301716	-0.0763313	-0.129827	-0.0563687	-0.181021		-0.237304	-0.696611	-1.1181	-0.463123
206	212		817.478	6	5.22-5.24	0.0514393	0.0575391	0.0783274	0.225358	0.563208		0.0525639	0.0695174	0.0809152	0.209928	0.572353	206	212	-0.00112463	-0.0119784	-0.00258781	0.0154296	-0.00914478		-0.00188119		206	212	0.019259	0.0135383	0.0143771	0.0393878	0.0411174	0.0161015	0.0202965	0.0276388	0.0316368	0.0358751		-0.00674776	-0.0718701	-0.0155269	0.0925776	-0.0548687		-0.0775964	-0.850382	-0.143871	0.528994
211	222		1372.77	11	6.54-6.60	0.11015	0.196192	0.252623	0.311051	0.343623		0.117622	0.196304	0.24854	0.314328	0.362673	211	222	-0.00747178	-0.000112347	0.00408345	-0.00327693	-0.0190505		-0.00516562		211	222	0.00473772	0.00302958	0.00970149	0.0044171	0.0195562	0.00833664	0.0104365	0.00420746	0.0120545	0.00414898		-0.0821896	-0.00123582	0.0449179	-0.0360463	-0.209555		-1.34964	-0.0179061	0.668843	-0.442099
213	222		1172.65	9	6.41-6.45	0.0423058	0.0304862	0.0245562	0.0855008	0.22647		0.0452202	0.0429022	0.0397561	0.0851983	0.235588	213	222	-0.00291443	-0.0124159	-0.0151998	0.000302488	-0.00911758		-0.00786905		213	222	0.0163667	0.0147209	0.0219106	0.0170267	0.0144645	0.0161426	0.0169662	0.0185289	0.0177342	0.0123841		-0.0262299	-0.111743	-0.136799	0.00272239	-0.0820582		-0.219589	-0.957381	-0.917478	0.0213109
223	232		1148.63	9	6.11-6.14	0.47701	0.549249	0.565627	0.624228	0.627255		0.462293	0.552062	0.57352	0.644335	0.640063	223	232	0.0147169	-0.0028131	-0.0078932	-0.0201066	-0.012808		-0.0057808		223	232	0.00251426	0.00651376	0.0146677	0.000532504	0.0103035	0.0231917	0.013536	0.015594	0.00656617	0.00992819		0.132452	-0.0253179	-0.0710388	-0.18096	-0.115272		1.09272	-0.324359	-0.638605	-5.28645
227	239		1454.72	12	5.15-5.16	0.187351	0.259346	0.325493	0.485393	0.618316		0.187118	0.268412	0.328393	0.496281	0.625825	227	239	0.000232587	-0.00906617	-0.0029005	-0.0108886	-0.00750958		-0.00602644		227	239	0.00430945	0.00692512	0.00998993	0.00788918	0.0162001	0.00721816	0.0134639	0.0136032	0.0110784	0.0166445		0.00279104	-0.108794	-0.034806	-0.130663	-0.0901149		0.0479202	-1.03716	-0.297665	-1.3867
227	241		1695.86	14	6.48-6.50	0.164859	0.223087	0.282283	0.439872	0.639662		0.157776	0.220151	0.296894	0.446013	0.631678	227	241	0.00708358	0.00293593	-0.0146113	-0.00614104	0.0079839		-0.000549787		227	241	0.0103616	0.0165222	0.0110309	0.0131994	0.0139647	0.0103704	0.0162051	0.00176301	0.0127851	0.0133285		0.0991701	0.041103	-0.204558	-0.0859746	0.111775		0.836927	0.219731	-2.26548	-0.578828
228	239		1353.67	11	5.15-5.16	0.201418	0.271256	0.349738	0.523004	0.652407		0.203696	0.276943	0.350877	0.531039	0.671998	228	239	-0.00227815	-0.00568657	-0.00113948	-0.00803569	-0.0195902		-0.00734602		228	239	0.00730366	0.00851221	0.00240611	0.00149335	0.0049886	0.0138501	0.0115891	0.000767707	0.0113596	0.00327503		-0.0250597	-0.0625522	-0.0125343	-0.0883925	-0.215493		-0.252007	-0.684969	-0.781452	-1.21479
237	246		1145.66	9	7.12-7.20	0.119587	0.132934	0.1556	0.174787	0.200655		0.111102	0.14032	0.16142	0.181665	0.194786	237	246	0.00848524	-0.00738574	-0.00581924	-0.00687794	0.00586949		-0.00114564		237	246	0.0136267	0.010339	0.00662239	0.0129547	0.0145091	0.0115017	0.00663715	0.00695688	0.0135624	0.0113048		0.0763672	-0.0664716	-0.0523731	-0.0619015	0.0528254		0.824192	-1.04122	-1.04938	-0.635177
245	251		828.482	6	10.61-10.65	0.0152124	0.0257764	0.0761664	0.160315	0.248418		0.0105602	0.0230184	0.0840276	0.172901	0.259046	245	251	0.00465224	0.00275796	-0.00786119	-0.0125868	-0.0106279		-0.00473313		245	251	0.00198905	0.00188408	0.00149254	0.013245	0.00314577	0.00609453	0.00413831	0.00614502	0.00495299	0.00135547		0.0279134	0.0165478	-0.0471672	-0.0755209	-0.0637672		1.25691	1.05056	-2.15317	-1.54171
252	263		1384.8	11	4.91-4.93	0.0354465	0.039864	0.050095	0.106914	0.285647		0.0333862	0.0394646	0.0433315	0.100909	0.289384	252	263	0.00206038	0.000399457	0.0067635	0.00600448	-0.00373772		0.00229802		252	263	0.0125741	0.0149433	0.00847191	0.00867585	0.0210682	0.00953636	0.00888792	0.0181109	0.00791805	0.0149053		0.0226642	0.00439403	0.0743985	0.0660493	-0.0411149		0.226133	0.0397937	0.5859	0.885422
252	264		1497.89	12	6.49-6.54	0.0287474	0.0315838	0.0347362	0.100925	0.276463		0.0391412	0.031985	0.0414	0.106222	0.281845	252	264	-0.0103938	-0.000401119	-0.00666381	-0.00529701	-0.00538172		-0.00562749		252	264	0.00834266	0.00264055	0.00248333	0.00628159	0.00228458	0.0089745	0.00791244	0.00529042	0.00626741	0.00588072		-0.124725	-0.00481343	-0.0799657	-0.0635642	-0.0645806		-1.46921	-0.0832904	-1.97493	-1.03394
262	271		1120.68	9	7.13-7.17	0.0235003	0.0295154	0.0342421	0.107171	0.392233		0.0360552	0.0386667	0.0484803	0.102858	0.388056	262	271	-0.0125549	-0.00915124	-0.0142381	0.00431294	0.00417711		-0.00549085		262	271	0.0146312	0.00335224	0.0106993	0.0209056	0.0343388	0.00241708	0.00653549	0.0024728	0.00292687	0.0116564		-0.112994	-0.0823612	-0.128143	0.0388164	0.037594		-1.46638	-2.15797	-2.24573	0.353879
262	279		1967.11	17	8.65-8.75	0.0603135	0.123212	0.198023	0.324643	0.505904		0.0739068	0.124217	0.212427	0.333669	0.52042	262	279	-0.0135933	-0.0010043	-0.0144049	-0.00902546	-0.0145155		-0.0105087		262	279	0.00845031	0.0111325	0.0192447	0.0134843	0.0221598	0.016405	0.00784179	0.0134206	0.00733134	0.0226594		-0.231087	-0.0170731	-0.244884	-0.153433	-0.246764		-1.27587	-0.127744	-1.06342	-1.01851
264	271		950.578	7	7.03-7.08	0.150335	0.181134	0.176589	0.186087	0.182411		0.178228	0.185935	0.182785	0.183148	0.185859	264	271	-0.0278923	-0.00480107	-0.00619595	0.00293902	-0.00344819		-0.0078797		264	271	0.0516501	0.01359	0.0138915	0.0190469	0.0230235	0.0204203	0.0128977	0.0193972	0.0154111	0.0117186		-0.195246	-0.0336075	-0.0433716	0.0205731	-0.0241373		-0.869836	-0.443835	-0.449807	0.20777
265	272		950.578	7	7.55-7.60	0.0337284	0.0196296	0.0456921	0.107381	0.405203		0.0477087	0.0422446	0.0553467	0.124972	0.426467	265	272	-0.0139804	-0.0226149	-0.00965458	-0.0175913	-0.021264		-0.017021		265	272	0.0176733	0.0192181	0.0241695	0.0200083	0.0469053	0.0138047	0.0235804	0.0135446	0.0207674	0.0308507		-0.0978627	-0.158304	-0.0675821	-0.123139	-0.148848		-1.07977	-1.28765	-0.603561	-1.05656
265	279		1683.92	14	7.69-7.73	0.087601	0.157878	0.241766	0.373748	0.54143		0.08836	0.160422	0.256361	0.379375	0.558486	265	279	-0.000759062	-0.00254403	-0.0145954	-0.00562761	-0.0170553		-0.00811629		265	279	0.0045533	0.00986066	0.00785661	0.00723539	0.00909041	0.00564222	0.00455554	0.00247836	0.00408252	0.00484893		-0.0106269	-0.0356164	-0.204336	-0.0787866	-0.238775		-0.181334	-0.405666	-3.06862	-1.17329
266	278		1423.77	12	5.50-5.51	0.0846485	0.167231	0.24861	0.360124	0.558776		0.0919199	0.162604	0.254355	0.364904	0.569263	266	278	-0.00727139	0.00462624	-0.00574453	-0.00477948	-0.0104868		-0.00473119		266	278	0.00460448	0.00706169	0.0124658	0.0188736	0.0231057	0.0114193	0.0114177	0.0148205	0.0215117	0.0152667		-0.0872567	0.0555149	-0.0689343	-0.0573537	-0.125842		-1.02289	0.596863	-0.513776	-0.289273
266	279		1570.83	13	7.47-7.53	0.0777879	0.165052	0.261533	0.393705	0.567907		0.0861923	0.168619	0.260966	0.401281	0.570293	266	279	-0.00840436	-0.0035667	0.000566361	-0.00757612	-0.00238576		-0.00427332		266	279	0.0150983	0.00886406	0.00845006	0.0145742	0.0159018	0.0103447	0.0110501	0.00669185	0.00774925	0.0100621		-0.109257	-0.0463672	0.00736269	-0.0984896	-0.0310149		-0.795358	-0.436095	0.0910081	-0.794984
273	279		752.357	6	6.85-6.90	0.11883	0.258489	0.408543	0.517559	0.507733		0.115635	0.254143	0.408713	0.514062	0.518957	273	279	0.00319453	0.00434552	-0.000170149	0.00349701	-0.0112241		-7.14428e-05		273	279	0.00698134	0.00526816	0.00590498	0.000858458	0.0111095	0.00390398	0.00497811	0.00705149	0.0123709	0.00732363		0.0191672	0.0260731	-0.0010209	0.0209821	-0.0673448		0.691742	1.03843	-0.0320424	0.488443
276	283		805.347	7	4.91-4.94	0.00814883	0.0410335	0.0624874	0.0669437	0.158428		0.0166561	0.0573107	0.0608446	0.0854087	0.158798	276	283	-0.00850725	-0.0162772	0.00164286	-0.018465	-0.000369936		-0.00839531		276	283	0.0110614	0.0111977	0.010674	0.00918422	0.0143109	0.0147744	0.0141277	0.0157853	0.0179522	0.0120211		-0.0595507	-0.11394	0.0115	-0.129255	-0.00258955		-0.798368	-1.56391	0.149328	-1.58602
282	288		880.525	6	9.27-9.35	0.0517239	0.19507	0.40129	0.581391	0.582601		0.0623851	0.176433	0.409642	0.598679	0.556308	282	288	-0.0106612	0.0186368	-0.00835174	-0.0172876	0.026293		0.00172587		282	288	0.00442811	0.00654378	0.00732886	0.00560025	0.0355209	0.00365473	0.0308443	0.0130607	0.00681343	0.0674214		-0.0639672	0.111821	-0.0501104	-0.103725	0.157758		-3.21617	1.02376	-0.965893	-3.39504
282	294		1579.88	12	7.75-7.80	0.105164	0.271849	0.489209	0.708938	0.732351		0.107765	0.266469	0.498199	0.706889	0.740377	282	294	-0.00260062	0.00537973	-0.00899055	0.00204913	-0.00802612		-0.00243769		282	294	0.0146734	0.0121607	0.0129631	0.0138663	0.0133506	0.0150836	0.0169195	0.0145397	0.0120553	0.0120087		-0.0312075	0.0645567	-0.107887	0.0245896	-0.0963134		-0.214054	0.447198	-0.799417	0.193164
289	308		2435.31	19	6.11-6.29	0.0981261	0.141548	0.177534	0.195344	0.202435		0.100372	0.143562	0.167392	0.190248	0.201135	289	308	-0.00224627	-0.00201422	0.0101412	0.00509576	0.00130008		0.00245532		289	308	0.0113664	0.00233928	0.006411	0.00749796	0.00610998	0.0170449	0.0102573	0.00683739	0.00476426	0.0154999		-0.0426791	-0.0382701	0.192684	0.0968194	0.0247015		-0.189907	-0.331608	1.87404	0.993534
302	308		876.53	6	9.65-9.74	-0.0205104	-0.0031092	-0.0210709	0.0533667	0.324372		-0.0126706	0.0106592	0.0196259	0.0714361	0.350934	302	308	-0.0078398	-0.0137684	-0.0406968	-0.0180694	-0.0265622		-0.0213873		302	308	0.0312361	0.0176597	0.0184279	0.030903	0.0217692	0.0199229	0.0204502	0.0157239	0.0139256	0.0184527		-0.0470388	-0.0826104	-0.244181	-0.108416	-0.159373		-0.366515	-0.882592	-2.90982	-0.923337
308	314		787.467	6	6.89-6.93	0.0252507	0.0325381	0.0631714	0.236742	0.542295		0.0333376	0.0322806	0.0636595	0.250274	0.549783	308	314	-0.00808682	0.000257463	-0.00048806	-0.0135328	-0.00748806		-0.00586766		308	314	0.0113356	0.0104923	0.0134975	0.0311764	0.0122866	0.0134393	0.00915771	0.0195577	0.0224423	0.00995323		-0.0485209	0.00154478	-0.00292836	-0.081197	-0.0449284		-0.796676	0.0320205	-0.0355738	-0.610185
326	333		983.508	6	12.90-12.93	0.0663351	0.115923	0.251001	0.34699	0.353595		0.0745764	0.127305	0.251199	0.357034	0.356318	326	333	-0.00824129	-0.0113828	-0.000197761	-0.010044	-0.00272313		-0.00651781		326	333	0.00910348	0.00950896	0.00182413	0.00336542	0.0031495	0.00221692	0.000776617	0.00491567	0.0020291	0.00456766		-0.0494478	-0.068297	-0.00118657	-0.0602642	-0.0163388		-1.52348	-2.0665	-0.0653287	-4.42688
327	333		896.476	5	12.95-12.98	0.0290693	0.0927719	0.247494	0.366843	0.366117		0.035777	0.0932639	0.246803	0.36677	0.370269	327	333	-0.00670776	-0.00049194	0.000691343	7.22388e-05	-0.00415194		-0.00211761		327	333	0.0223546	0.0233427	0.0235328	0.0280899	0.0253296	0.0225233	0.0228967	0.024297	0.026	0.0247218		-0.0335388	-0.0024597	0.00345672	0.000361194	-0.0207597		-0.366115	-0.0260589	0.035401	0.00326894
330	337		965.505	6	13.30-13.32	0.00865796	0.0489973	0.131742	0.200328	0.232963		0.0240562	0.0486552	0.143089	0.224219	0.262495	330	337	-0.0153983	0.00034204	-0.0113468	-0.0238913	-0.0295318		-0.0159652		330	337	0.0142378	0.016609	0.0166751	0.0194843	0.0213988	0.0178905	0.0116204	0.0121323	0.0574351	0.0237517		-0.0923896	0.00205224	-0.0680806	-0.143348	-0.177191		-1.16646	0.0292263	-0.953035	-0.68229
339	348		1139.59	8	12.35-12.39	0.340207	0.443532	0.485776	0.590253	0.682824		0.317047	0.456638	0.490201	0.589802	0.669391	339	348	0.0231597	-0.0131058	-0.00442537	0.000450373	0.013433		0.00390239		339	348	0.00708265	0.00861194	0.00826903	0.0048319	0.0132224	0.00308545	0.01002	0.0134196	0.0106985	0.00639216		0.185278	-0.104846	-0.035403	0.00360299	0.107464		5.19236	-1.71809	-0.486273	0.0664508
344	351		901.462	6	6.66-6.69	0.167334	0.440296	0.452121	0.489369	0.502669		0.160763	0.448153	0.471696	0.488854	0.500624	344	351	0.00657015	-0.00785697	-0.0195746	0.000515174	0.00204453		-0.00366035		344	351	0.0165647	0.0132694	0.0198637	0.0146861	0.0125172	0.0126677	0.010754	0.00981368	0.0152866	0.0124659		0.0394209	-0.0471418	-0.117448	0.00309104	0.0122672		0.54571	-0.796762	-1.53027	0.0420937
345	351		802.394	5	6.66-6.69	0.159532	0.387917	0.436754	0.477763	0.479604		0.158797	0.422321	0.453887	0.495519	0.50719	345	351	0.000734328	-0.0344033	-0.0171328	-0.0177567	-0.0275854		-0.0192288		345	351	0.0124654	0.0133484	0.00154358	0.0205803	0.0123101	0.0111373	0.023497	0.0133791	0.0055	0.0146809		0.00367164	-0.172016	-0.0856642	-0.0887836	-0.137927		0.0760883	-2.20502	-2.20339	-1.44375
355	364		988.531	9	6.72-6.77	0.127928	0.362692	0.517866	0.551004	0.544974		0.125065	0.37492	0.535461	0.552821	0.558465	355	364	0.00286252	-0.0122282	-0.0175947	-0.00181725	-0.0134912		-0.00845376		355	364	0.00510365	0.00326882	0.0113123	1.88535e-14	0.00302222	0.00454096	0.0113493	0.00522653	0.00847148	0.00576219		0.0257627	-0.110054	-0.158352	-0.0163552	-0.121421		0.725775	-1.79329	-2.44556	-0.371549
378	384		888.53	5	9.51-9.55	0.0760985	0.214254	0.362985	0.401587	0.41049		0.0744543	0.20645	0.37175	0.391184	0.407213	378	384	0.00164418	0.00780358	-0.00876567	0.0104033	0.00327642		0.00287236		378	384	0.00657284	0.00491791	0.00296836	0.0299093	0.0316478	0.00301045	0.00662716	0.00876119	0.0210696	0.00569075		0.0082209	0.0390179	-0.0438284	0.0520164	0.0163821		0.393917	1.63781	-1.64129	0.49252
421	427		891.388	6	11.11-11.15	0.0289808	0.0755963	0.0777704	0.177258	0.219185		0.0337898	0.0457177	0.0741751	0.186054	0.228427	421	427	-0.00480896	0.0298786	0.00359527	-0.00879677	-0.00924204		0.00212522		421	427	0.00732537	0.0326313	0.0131572	0.00217811	0.0168684	0.00714204	0.00471567	0.00553259	0.0061398	0.00812189		-0.0288537	0.179272	0.0215716	-0.0527806	-0.0554522		-0.814143	1.56963	0.436289	-2.33878
429	436		913.547	7	8.53-8.58	0.0337753	0.0523431	0.0556309	0.0530919	0.0684925		0.0533495	0.0614716	0.0639034	0.0652518	0.0725458	429	436	-0.0195742	-0.00912857	-0.00827249	-0.0121599	-0.0040533		-0.0106377		429	436	0.0257147	0.00625075	0.00637996	0.00655608	0.00420512	0.00797164	0.00495011	0.00595693	0.00539318	0.00491087		-0.137019	-0.0639	-0.0579075	-0.0851194	-0.0283731		-1.25932	-1.98298	-1.64154	-2.48095
430	436		800.462	6	9.37-9.43	0.0502731	0.0570938	0.0375736	0.0657157	0.0614296		0.0460622	0.0647866	0.0688532	0.0646396	0.0769269	430	436	0.00421095	-0.00769279	-0.0312796	0.00107612	-0.0154973		-0.00983652		430	436	0.0173886	0.00577537	0.00620796	0.00878433	0.00252612	0.00444677	0.0181729	0.00373582	0.00712114	0.00761095		0.0252657	-0.0461567	-0.187678	0.00645672	-0.0929836		0.406369	-0.698759	-7.4776	0.164827
437	447		1256.64	9	8.27-8.34	0.283259	0.301272	0.313812	0.349422	0.421581		0.291782	0.306585	0.327564	0.358679	0.430015	437	447	-0.00852305	-0.0053131	-0.0137519	-0.00925755	-0.00843416		-0.00905595		437	447	0.006933	0.00560315	0.00343383	0.00431824	0.00522687	0.00313897	0.00200332	0.00533881	0.00713731	0.0095733		-0.0767075	-0.0478179	-0.123767	-0.0833179	-0.0759075		-1.93974	-1.54652	-3.75235	-1.92215
446	458		1589.85	11	6.39-6.43	0.0438174	0.0519125	0.104058	0.317912	0.658125		0.0383689	0.0570255	0.10511	0.314476	0.648044	446	458	0.00544844	-0.00511303	-0.00105224	0.00343596	0.0100813		0.00256008		446	458	0.0117518	0.0102966	0.0112902	0.0327142	0.042167	0.00998752	0.0112204	0.0107543	0.0312278	0.0172079		0.0599328	-0.0562433	-0.0115746	0.0377955	0.110894		0.611893	-0.581531	-0.116886	0.131589
448	456		1083.63	7	6.78-6.81	0.0602271	0.0880032	0.105254	0.186771	0.376797		0.0760299	0.0864949	0.100602	0.187725	0.376632	448	456	-0.0158028	0.00150832	0.00465117	-0.000953092	0.000164392		-0.0020864		448	456	0.00584009	0.0113915	0.00610512	0.00654584	0.00494733	0.00924478	0.0122996	0.00808827	0.0152945	0.00317761		-0.110619	0.0105582	0.0325582	-0.00667164	0.00115075		-2.5031	0.155835	0.794975	-0.0992286
448	457		1230.7	8	9.62-9.69	0.0657289	0.0908375	0.112073	0.213698	0.400231		0.0663869	0.0853858	0.11593	0.206908	0.393776	448	457	-0.000658022	0.00545168	-0.0038569	0.00679011	0.0064556		0.00283649		448	457	0.00923675	0.0109175	0.0143989	0.00901493	0.0180935	0.0185974	0.0104336	0.00756586	0.0116164	0.0142812		-0.00526418	0.0436134	-0.0308552	0.0543209	0.0516448		-0.0548873	0.625279	-0.410704	0.799834
448	458		1361.74	9	7.35-7.39	0.32087	0.388652	0.389653	0.411109	0.441135		0.331455	0.390632	0.402478	0.442436	0.451909	448	458	-0.0105847	-0.00197993	-0.0128255	-0.0313272	-0.0107735		-0.0134982		448	458	0.00442736	0.0104741	0.011695	0.0121988	0.00652985	0.00898723	0.00932786	0.0115877	0.016605	0.00802338		-0.0952627	-0.0178194	-0.11543	-0.281945	-0.0969612		-1.82993	-0.244507	-1.34931	-2.63345
452	463		1430.69	10	11.69-11.89	0.141379	0.213054	0.272649	0.360154	0.484956		0.140037	0.221572	0.284489	0.366618	0.495627	452	463	0.00134149	-0.00851836	-0.0118399	-0.00646313	-0.0106716		-0.0072303		452	463	0.0181579	0.0093206	0.00890836	0.00842657	0.00813299	0.00932224	0.00800209	0.0081209	0.0142503	0.016351		0.0134149	-0.0851836	-0.118399	-0.0646313	-0.106716		0.113837	-1.20105	-1.70123	-0.676187
457	463		864.374	6	9.83-9.91	0.118039	0.23971	0.292077	0.30892	0.359507		0.120069	0.247896	0.30107	0.327104	0.362621	457	463	-0.00202985	-0.00818632	-0.00899353	-0.0181836	-0.00311343		-0.00810134		457	463	0.0183774	0.0181714	0.0177122	0.018149	0.0174085	0.0233368	0.0218025	0.0211836	0.0248124	0.0225045		-0.0121791	-0.0491179	-0.0539612	-0.109101	-0.0186806		-0.118361	-0.499578	-0.564132	-1.02451
480	492		1340.66	12	11.08-11.17	0.0490167	0.0830219	0.111668	0.165958	0.270452		0.041294	0.0904607	0.11175	0.168086	0.286985	480	492	0.00772264	-0.00743881	-8.19652e-05	-0.00212836	-0.0165327		-0.00369184		480	492	0.0124111	0.00101841	0.00306766	0.0129648	0.001526	0.0128042	0.00348756	0.0168407	0.00930348	0.0180614		0.0926716	-0.0892657	-0.000983582	-0.0255403	-0.198393		0.750109	-3.54628	-0.00829358	-0.231016
482	488		638.314	6	6.51-6.53	0.0200065	0.0677706	0.128107	0.140698	0.21128		0.0130475	0.075803	0.121442	0.123902	0.181887	482	488	0.00695896	-0.00803234	0.00666542	0.0167958	0.0293928		0.0103561		482	488	0.00687413	0.00300995	0.00358507	0.00264055	0.00453781	0.00830945	0.00582512	0.00412512	0.0116943	0.0083301		0.0417537	-0.048194	0.0399925	0.100775	0.176357		1.11767	-2.12182	2.11239	2.42655
490	512		2412.2	20	6.56-6.62	0.402689	0.401091	0.399057	0.419453	0.405547		0.408814	0.393937	0.413412	0.432864	0.423871	490	512	-0.00612537	0.00715418	-0.0143544	-0.0134104	-0.0183239		-0.00901199		490	512	0.00512082	0.014286	0.0176446	0.00741201	0.0073203	0.00578067	0.0130193	0.00491978	0.0127634	0.0127264		-0.122507	0.143084	-0.287088	-0.268209	-0.366478		-1.37381	0.641092	-1.3573	-1.57374
497	510		1551.8	11	6.53-6.58	0.46895	0.485473	0.495168	0.524099	0.51859		0.498371	0.509719	0.508129	0.544276	0.523765	497	510	-0.0294212	-0.0242465	-0.0129609	-0.0201773	-0.00517571		-0.0183963		497	510	0.0113999	0.00645862	0.0069327	0.0157761	0.0166539	0.0140696	0.00776879	0.00960773	0.0256773	0.021168		-0.323633	-0.266712	-0.14257	-0.221951	-0.0569328		-2.81412	-4.15686	-1.89478	-1.15966
497	511		1665.84	12	6.48-6.54	0.482846	0.505018	0.50756	0.50621	0.520979		0.500475	0.499764	0.515422	0.532662	0.526852	497	511	-0.0176295	0.00525398	-0.00786206	-0.0264519	-0.00587276		-0.0105124		497	511	0.00828047	0.00616306	0.0106802	0.00663333	0.0181524	0.0135328	0.012359	0.0115361	0.0168825	0.0093092		-0.211554	0.0630478	-0.0943448	-0.317422	-0.0704731		-1.92466	0.658935	-0.866201	-2.52584
515	526		1352.65	8	6.58-6.60	0.735951	0.743326	0.752492	0.743604	0.743646		0.74277	0.745318	0.751632	0.750553	0.749884	515	526	-0.00681959	-0.00199179	0.000860075	-0.00694944	-0.00623806		-0.00422776		515	526	0.00589739	0.0122619	0.0087916	0.00587743	0.00526213	0.00609384	0.0103285	0.00932817	0.0144067	0.00650728		-0.0545567	-0.0159343	0.0068806	-0.0555955	-0.0499045		-1.39287	-0.215184	0.116217	-0.773598
530	547		1946.03	15	10.40-10.46	0.80619	0.818871	0.825163	0.832326	0.850077		0.806341	0.836475	0.836157	0.842869	0.860801	530	547	-0.000150846	-0.0176043	-0.0109943	-0.0105424	-0.0107245		-0.0100033		530	547	0.0105719	0.00441453	0.00287731	0.00807254	0.00406667	0.016451	0.01299	0.00551542	0.00950657	0.00557323		-0.00226269	-0.264064	-0.164915	-0.158136	-0.160867		-0.0133608	-2.22248	-3.06112	-1.46412
543	552		1050.57	9	5.42-5.47	0.011831	0.02321	0.0200761	0.0342106	0.0965459		0.0179574	0.0173254	0.0276978	0.0339428	0.0996786	543	552	-0.00612637	0.00588458	-0.00762172	0.000267828	-0.00313267		-0.00214567		543	552	0.00855406	0.0109507	0.00956617	0.00606866	0.00438408	0.00772123	0.0125294	0.0109874	0.0119572	0.001399		-0.0551373	0.0529612	-0.0685955	0.00241045	-0.028194		-0.920836	0.612508	-0.906162	0.0345953
554	565		1380.75	11	7.00-7.12	0.027076	0.0309168	0.0432881	0.143847	0.316804		0.0253323	0.0352486	0.0508893	0.145035	0.336655	554	565	0.00174369	-0.00433175	-0.00760122	-0.0011886	-0.0198513		-0.00624583		554	565	0.00987938	0.0107009	0.0153973	0.00816336	0.0174115	0.00627191	0.00729294	0.00932795	0.00718643	0.0146096		0.0191806	-0.0476493	-0.0836134	-0.0130746	-0.218364		0.258087	-0.579377	-0.73133	-0.189292
557	568		1422.76	11	4.98-5.01	0.389701	0.383936	0.385799	0.404659	0.396606		0.401377	0.396507	0.386499	0.437422	0.41891	557	568	-0.0116763	-0.0125701	-0.0007	-0.0327626	-0.0223042		-0.0160026		557	568	0.0230748	0.0145843	0.0197239	0.0251917	0.0228817	0.0181225	0.0145753	0.0199745	0.0139638	0.027687		-0.128439	-0.138272	-0.0077	-0.360388	-0.245346		-0.689279	-1.05593	-0.0431909	-1.97016
570	581		1159.56	10	7.47-7.52	0.542719	0.560537	0.574031	0.579081	0.573491		0.548364	0.579224	0.576976	0.58191	0.589309	570	581	-0.00564463	-0.0186867	-0.00294537	-0.00282925	-0.0158176		-0.00918472		570	581	0.00624851	0.00832701	0.000592388	0.01257	0.011136	0	0.00899149	0.00993821	0.0151631	0		-0.0564463	-0.186867	-0.0294537	-0.0282925	-0.158176		-1.56466	-2.64106	-0.512416	-0.248805
581	591		1102.5	9	10.41-10.47	0.0533007	0.0721841	0.108933	0.251293	0.330444		0.0540035	0.0982823	0.130728	0.247674	0.382353	581	591	-0.000702819	-0.0260982	-0.0217945	0.00361857	-0.0519091		-0.0193772		581	591	0.015972	0.0205945	0.0260736	0.0145385	0.0391048	0.0138504	0.0182	0.0111836	0.0174181	0.0158844		-0.00632537	-0.234884	-0.196151	0.0325672	-0.467182		-0.0575812	-1.64471	-1.33056	0.276247
590	599		999.497	9	10.31-10.37	0.0315197	0.0533685	0.0691544	0.156434	0.247137		0.0350638	0.0595909	0.0743109	0.158353	0.258872	590	599	-0.00354411	-0.00622239	-0.00515655	-0.00191891	-0.0117352		-0.00571542		590	599	0.00735207	0.00126683	0.00461194	0.00273167	0.00644594	0.00304909	0.00372156	0.0022937	0.00529735	0.00170431		-0.031897	-0.0560015	-0.046409	-0.0172701	-0.105616		-0.77125	-2.74148	-1.73397	-0.55764
602	609		746.332	6	4.88-4.89	0.777747	0.760983	0.763188	0.758611	0.752608		0.766428	0.76518	0.760795	0.76802	0.755698	602	609	0.0113184	-0.00419751	0.00239303	-0.00940896	-0.0030903		-0.000597065		602	609	0.00890597	0.00417164	0.00471418	0.00468532	0.00288209	0.00553483	0.00769677	0.00281368	0.010446	0.00843881		0.0679104	-0.0251851	0.0143582	-0.0564537	-0.0185418		1.86959	-0.830457	0.754981	-1.42347
610	617		876.446	6	11.04-11.07	0.622018	0.6297	0.637597	0.639125	0.639771		0.619981	0.629444	0.641808	0.637866	0.629458	610	617	0.00203731	0.000256965	-0.00421095	0.00125846	0.0103127		0.0019309		610	617	0.0132612	0.021802	0.0129993	0.0168729	0.0144719	0.0113423	0.0139878	0.014259	0.020156	0.0281316		0.0122239	0.00154179	-0.0252657	0.00755075	0.0618761		0.202218	0.0171822	-0.378002	0.0829227
611	617		789.414	5	11.02-11.06	0.608119	0.638938	0.644861	0.642706	0.648272		0.612144	0.633852	0.648637	0.656441	0.656145	611	617	-0.00402537	0.00508537	-0.00377612	-0.0137343	-0.00787343		-0.00486478		611	617	0.00693701	0.0110376	0.0162675	0.0117713	0.0270952	0.00638866	0.020026	0.00255851	0.0106672	0.00605284		-0.0201269	0.0254269	-0.0188806	-0.0686716	-0.0393672		-0.739308	0.385201	-0.397174	-1.49749
613	625		1424.71	10	4.49-4.50	0.544177	0.534917	0.531905	0.541442	0.522452		0.544485	0.530366	0.534427	0.563321	0.54015	613	625	-0.00030806	0.00455075	-0.00252194	-0.0218793	-0.0176988		-0.00757146		613	625	0.0237672	0.0158201	0.00993567	0.0178724	0.0186421	0.00576179	0.00506075	0.0180604	0.0192645	0.0280831		-0.0030806	0.0455075	-0.0252194	-0.218793	-0.176988		-0.0218181	0.474544	-0.211911	-1.44211
628	634		805.357	6	5.54-5.54	0.465828	0.625743	0.700885	0.728656	0.716773		0.455357	0.625353	0.712848	0.723912	0.725019	628	634	0.0104711	0.000389303	-0.0119629	0.00474378	-0.00824627		-0.000920995		628	634	0.00694254	0.00235398	0.00735522	0.00264104	0.00622313	0.00304478	0.01465	0.00350423	0.00555522	0.008		0.0628269	0.00233582	-0.0717776	0.0284627	-0.0494776		2.39241	0.0454439	-2.54322	1.33578
639	649		1095.5	10	4.63-4.65	0.0858809	0.166864	0.259045	0.376337	0.385585		0.0747728	0.167041	0.257196	0.357181	0.37201	639	649	0.0111081	-0.000177313	0.00184836	0.0191563	0.0135743		0.00910194		639	649	0.00321254	0.00440269	0.00656	0.0137169	0.0106318	0.00428612	0.010866	0.0243099	0.00175343	0.00263791		0.111081	-0.00177313	0.0184836	0.191563	0.135743		3.5919	-0.0261954	0.127146	2.39937
641	651		1095.5	10	6.04-6.08	0.106739	0.171215	0.269812	0.355128	0.378025		0.0927512	0.175126	0.264497	0.372436	0.3908	641	651	0.0139878	-0.00391015	0.00531507	-0.0173082	-0.0127748		-0.00293806		641	651	0.00631985	0.00697642	0.00778299	0.00616299	0.0114709	0.00277896	0.00534925	0.00824373	0.00457149	0.0129166		0.139878	-0.0391015	0.0531507	-0.173082	-0.127748		3.50928	-0.770383	0.812009	-3.90684
644	651		790.358	7	7.15-7.17	0.570336	0.57676	0.58169	0.587261	0.575524		0.562897	0.587767	0.589308	0.584781	0.582961	644	651	0.00743902	-0.011007	-0.00761834	0.00247996	-0.00743667		-0.00322861		644	651	0.00702729	0.00624797	0.00612836	0.00619616	0.0112136	0.00235416	0.0107768	0.00358401	0.0133021	0.00542857		0.0520731	-0.0770493	-0.0533284	0.0173597	-0.0520567		1.73857	-1.53045	-1.85865	0.292714
650	661		1264.59	10	7.57-7.62	0.0255552	0.021531	0.0329296	0.0391075	0.0744179		0.0283924	0.0402131	0.042467	0.0344833	0.0620827	650	661	-0.00283716	-0.0186821	-0.00953746	0.00462418	0.0123352		-0.00281946		650	661	0.0184901	0.00861507	0.010251	0.0094991	0.015241	0.0129772	0.0143343	0.0093906	0.0137916	0.012443		-0.0283716	-0.186821	-0.0953746	0.0462418	0.123352		-0.217538	-1.93484	-1.18827	0.47827
652	660		965.44	7	10.19-10.22	0.535942	0.593083	0.60006	0.612141	0.619309		0.537717	0.598478	0.613612	0.629697	0.626017	652	660	-0.00177527	-0.0053951	-0.0135525	-0.0175559	-0.00670789		-0.00899731		652	660	0.0182237	0.0178721	0.0154955	0.0114011	0.0131456	0.0100708	0.0127392	0.0109921	0.0117659	0.0104974		-0.0124269	-0.0377657	-0.0948672	-0.122891	-0.0469552		-0.147679	-0.425767	-1.23556	-1.85599
652	661		1064.51	8	10.98-11.02	0.584063	0.675834	0.650226	0.662253	0.66884		0.573203	0.675622	0.671701	0.692884	0.692174	652	661	0.0108606	0.0002125	-0.021475	-0.0306306	-0.0233338		-0.0128732		652	661	0.0165496	0.0204474	0.019809	0.0219685	0.00172257	0.0350185	0.0152078	0.020466	0.00906045	0.0086041		0.0868851	0.0017	-0.1718	-0.245045	-0.18667		0.485673	0.0144435	-1.30592	-2.23257
652	668		1838.79	15	11.08-11.13	0.158239	0.265611	0.337421	0.411354	0.497504		0.141637	0.278388	0.329269	0.415047	0.505001	652	668	0.0166018	-0.0127778	0.00815224	-0.00369284	-0.00749682		0.000157313		652	668	0.0049398	0.0064392	0.0118497	0.0036404	0.0114589	2.26242e-14	0.00659363	0.00781234	0.00516289	0.00738975		0.249027	-0.191667	0.122284	-0.0553925	-0.112452		5.82111	-2.40139	0.994849	-1.01249
658	668		1165.47	10	9.89-9.91	0.0625613	0.0994148	0.104251	0.117972	0.14669		0.0615297	0.0982225	0.12221	0.125107	0.1586	658	668	0.00103164	0.00119224	-0.017959	-0.00713522	-0.0119103		-0.00695612		658	668	0.0157546	0.0128572	0.0171731	0.0170651	0.0193473	0.0137796	0.0116812	0.0133569	0.021411	0.0213633		0.0103164	0.0119224	-0.17959	-0.0713522	-0.119103		0.0853711	0.118876	-1.42976	-0.451377
[truncated: 8 more columns]

## Sheet: Vps34 Summary
				Date:			22.11.19		SD	0.010392															Unhide														for STDEV	Threshold Value=		0.5
Global Color scale				Experiment date:			27.09.16			0.000843355																														Threshold percent		0.02
0.1	0.35	0.7		Protein:			VPS34																																	t-threshold		2.776
				Instrument:			Waters Synapt G2 Si										-0.1	-0.05	-0.02	0.02	0.05	0.1
																													STDEVS					STDEVS
		Max Frac Deut		0.67		a	Apo					b	Lipids						% Differences (Apo - With Lipids)										a	Apo				b	Lipids					Differences in Daltons (Differences >+/- 0.5Da Highlighted						t-test	*=assumes triplicate values, a p=0.05 test
Start	End	Mod	m/z	#D	RT	0.005	0.05	0.5	5	50		0.005	0.05	0.5	5	50	Start	End	0.005	0.05	0.5	5	50		avg		Start	End	0.005	0.05	0.5	5	50	0.005	0.05	0.5	5	50		0.005	0.05	0.5	5	50		0.005	0.05	0.5	5
15	21		814.467	6	11.42-11.44	0.100246	0.206587	0.266174	0.344952	0.34575		0.0920383	0.213489	0.25364	0.33683	0.354967	15	21	0.00629403	-0.00690224	0.0125341	0.00812239	-0.00921766		0.00216612		15	21	0.00698134	0.00403831	0.00395821	0.00247811	0.00144751	0.00399179	0.00662413	0.00636269	0.00599328	0.0011097		0.0377642	-0.0414134	0.0752045	0.0487343	-0.055306		1.76769	-1.54099	2.89717	2.16924
15	24		1112.67	9	6.93-7.00	0.00754295	0.00839121	0.00468657	0.0234705	0.000377114		0.00819884	0.0109688	0.0155237	0.0197013	0.00286202	15	24	-0.000655887	-0.00257761	-0.0108371	0.00376915	-0.00248491		-0.00255728		15	24	0.00295771	0.00394975	0.0034942	0.00913317	0.00482172	0.00462488	0.00628192	0.00669237	0.000307131	0.0168574		-0.00590299	-0.0231985	-0.0975343	0.0339224	-0.0223642		-0.206936	-0.601655	-2.48627	0.714394
19	26		857.545	7	10.20-10.26	0.0298147	0.0414241	0.0812045	0.0892023	0.147427		0.0639537	0.062909	0.0621942	0.0982015	0.146908	19	26	-0.034139	-0.0214849	0.0190102	-0.00899915	0.000518977		-0.00901876		19	26	0.019574	0.0201141	0.00324712	0.0118183	0.00704797	0.0138286	0.00689467	0.00807249	0.00371045	0.00745458		-0.238973	-0.150394	0.133072	-0.062994	0.00363284		-2.46726	-1.75013	3.7842	-1.25832
26	37		1436.79	11	6.66-6.70	0.0163487	0.00547748	0.022063	0.00173379	0.0080156		0.0199024	0.0131731	0.0079981	-0.00506988	0.0214757	26	37	-0.00355373	-0.00769566	0.0140649	0.00680366	-0.0134601		-0.000768195		26	37	0.00581642	0.0170635	0.0184874	0.0253858	0.00848005	0.00334722	0.0110794	0.0111782	0.0193304	0.0243324		-0.039091	-0.0846522	0.154713	0.0748403	-0.148061		-0.917217	-0.655165	1.12762	0.369324
35	50		1873.98	14	11.65-11.74	0.0940552	0.16039	0.192576	0.229759	0.306564		0.0831002	0.156894	0.194333	0.218733	0.310227	35	50	0.010955	0.00349606	-0.00175704	0.0110269	-0.0036629		0.0040116		35	50	0.00951972	0.0135576	0.0109175	0.00496002	0.00677303	0.0118415	0.0104835	0.00203699	0.0034064	0.0086387		0.15337	0.0489448	-0.0245985	0.154376	-0.0512806		1.24886	0.353329	-0.274024	3.17414
50	56		845.298	6	6.05-6.06	0.435557	0.542664	0.589272	0.618993	0.622021		0.434618	0.530112	0.59371	0.611517	0.615238	50	56	0.000939303	0.012552	-0.00443831	0.00747512	0.00678259		0.00466214		50	56	0.0135754	0.0136067	0.0076597	0.00266841	0.00394104	0.0206164	0.0121968	0.00787886	0.0231179	0.0206697		0.00563582	0.0753119	-0.0266299	0.0448507	0.0406955		0.0659085	1.18977	-0.699583	0.556361
50	57		958.382	7	9.03-9.07	0.284306	0.336679	0.380981	0.406197	0.414871		0.294538	0.347479	0.399736	0.42197	0.432101	50	57	-0.0102318	-0.0108	-0.0187548	-0.0157727	-0.0172301		-0.0145579		50	57	0.00940085	0.00739211	0.00857505	0.00647292	0.00166119	0.00762708	0.0147232	0.011816	0.00552665	0.00149104		-0.0716224	-0.0756	-0.131284	-0.110409	-0.12061		-1.46393	-1.13544	-2.22501	-3.20974
66	72		727.435	5	9.87-9.93	0.0825263	0.169632	0.287237	0.476896	0.547803		0.0697093	0.173815	0.290523	0.494161	0.546173	66	72	0.012817	-0.00418239	-0.00328567	-0.0172651	0.00162955		-0.00205731		66	72	0.00557373	0.00955313	0.00070806	0.000693134	0.0051809	0.00543642	0.00758388	0.00866119	0.0410624	0.00430507		0.0640851	-0.0209119	-0.0164284	-0.0863254	0.00814776		2.85125	-0.593904	-0.654878	-0.728154
91	105		1752.02	11	8.56-8.61	0.0704115	0.0977674	0.130138	0.213876	0.317308		0.0761281	0.10726	0.139779	0.217493	0.310861	91	105	-0.00571655	-0.00949227	-0.00964043	-0.00361737	0.00644681		-0.00440396		91	105	0.00971533	0.00180923	0.00537137	0.00326866	0.0092943	0.0193682	0.00698779	0.0115463	0.00807368	0.0026844		-0.0628821	-0.104415	-0.106045	-0.039791	0.0709149		-0.456951	-2.27773	-1.31122	-0.719321
94	105		1397.75	8	7.61-7.65	0.124193	0.158162	0.187449	0.324819	0.448959		0.116469	0.176704	0.214761	0.314535	0.435207	94	105	0.00772407	-0.0185414	-0.0273127	0.0102843	0.0137522		-0.00281869		94	105	0	0	0.0052181	0.0022472	0.00684478	0.022645	0.0137722	0.0154843	0.0108612	0.00200448		0.0617925	-0.148331	-0.218501	0.0822746	0.110018		0.590793	-2.33185	-2.89518	1.60604
94	109		1781.99	12	12.14-12.24	0.109366	0.204765	0.347958	0.398381	0.421086		0.107391	0.222062	0.361508	0.413173	0.434358	94	109	0.00197512	-0.0172966	-0.0135504	-0.0147917	-0.013272		-0.0113871		94	109	0.0109983	0.00497139	0.00574888	0.0035949	0.00804167	0.0077255	0.00943022	0.00415622	0.000274627	0.0101417		0.0237015	-0.20756	-0.162604	-0.1775	-0.159264		0.254532	-2.81028	-3.30846	-7.10603
108	129		2230.21	19	12.68-12.73	0.15785	0.170654	0.180754	0.208751	0.261411		0.157135	0.171295	0.175479	0.212505	0.257894	108	129	0.00071524	-0.000641791	0.00527518	-0.0037531	0.00351689		0.00102248		108	129	0.00755899	0.00555035	0.0024183	0.00617557	0.00186638	0.00347879	0.00449222	0.00801092	0.00324839	0.00514996		0.0135896	-0.012194	0.100228	-0.071309	0.0668209		0.148879	-0.155678	1.09189	-0.931607
109	126		1817.94	15	10.83-10.87	0.171209	0.194784	0.198938	0.256304	0.326464		0.168433	0.201914	0.202024	0.262185	0.336069	109	126	0.00277662	-0.00712995	-0.00308607	-0.0058809	-0.00960448		-0.00458496		109	126	0.00341134	0.0027401	0.0053201	0.0166813	0.00420756	0.00317751	0.00487025	0.011292	0.00289711	0.00730587		0.0416493	-0.106949	-0.046291	-0.0882134	-0.144067		1.03159	-2.20993	-0.428217	-0.601619
110	129		2016.08	17	11.57-11.62	0.178995	0.193596	0.201668	0.243914	0.295339		0.168859	0.203313	0.198486	0.239901	0.298155	110	129	0.0101354	-0.00971756	0.00318191	0.00401326	-0.00281668		0.000959263		110	129	0.0104578	0.02445	0.0189938	0.0055	0.0124924	0.0143205	0.0071137	0.0207104	0.0194728	0.0121422		0.172301	-0.165199	0.0540925	0.0682254	-0.0478836		0.989992	-0.66099	0.19612	0.343529
120	130		1076.6	9	10.96-11.00	0.0872123	0.123541	0.145416	0.160246	0.251125		0.0904413	0.138818	0.145101	0.163604	0.231934	120	130	-0.00322902	-0.0152774	0.000314594	-0.00335821	0.0191904		-0.00047194		120	130	0.00821294	0.00458358	0.00504975	0.001533	0.00604163	0.00299934	0.0115207	0.00914229	0.00718839	0.00546617		-0.0290612	-0.137497	0.00283134	-0.0302239	0.172713		-0.639658	-2.13414	0.0521717	-0.791368
124	139		1748.88	15	11.36-11.44	0.0979034	0.147197	0.177993	0.222558	0.29843		0.077155	0.146736	0.178748	0.21979	0.29997	124	139	0.0207484	0.000460995	-0.000754428	0.00276796	-0.0015394		0.0043367		124	139	0.00206468	0.0025209	0.00599234	0.00862308	0.00699025	2.26242e-14	0.00648667	0.00991363	0	0.00245692		0.311225	0.00691493	-0.0113164	0.0415194	-0.023091		17.4057	0.114734	-0.112803	0.555978
136	165		3327.62	26	11.36-11.39	0.190473	0.272974	0.342676	0.420164	0.457217		0.193219	0.277529	0.35348	0.427706	0.465295	136	165	-0.00274587	-0.00455465	-0.0108038	-0.00754196	-0.00807738		-0.00674473		136	165	0.0108538	0.00166739	0.00120264	0.00567824	0.00370924	0.00649782	0.000737256	0.00209432	0.00499707	0.00328846		-0.0713925	-0.118421	-0.280899	-0.196091	-0.210012		-0.375961	-4.32715	-7.74835	-1.72702
151	167		1704.84	14	6.14-6.17	0.351074	0.388492	0.41549	0.507488	0.577599		0.35723	0.406399	0.426917	0.501344	0.588947	151	167	-0.0061565	-0.0179065	-0.0114265	0.00614478	-0.0113482		-0.00813859		151	167	0.0134613	0.0109118	0.0104756	0.00804382	0.0122028	0.0141846	0.0129765	0.0141126	0.00904776	0.010385		-0.086191	-0.250691	-0.159972	0.0860269	-0.158875		-0.545293	-1.82929	-1.12607	0.879127
151	168		1791.87	15	12.62-12.67	0.0625289	0.0956158	0.151972	0.253517	0.40139		0.0549856	0.092532	0.145731	0.224009	0.387484	151	168	0.00754328	0.00308378	0.00624109	0.0295074	0.0139059		0.0120563		151	168	0.00337234	0.00663463	0.00527114	0.0102468	0.00754985	0.00309005	0.00662826	0.0108023	0.00713443	0.000643284		0.113149	0.0462567	0.0936164	0.44261	0.208588		2.85647	0.569536	0.899344	4.0933
152	167		1633.8	13	6.25-6.27	0.35632	0.392202	0.418877	0.495111	0.574345		0.35055	0.388635	0.410057	0.491688	0.570062	152	167	0.00577049	0.00356739	0.00882044	0.00342285	0.00428301		0.00517284		152	167	0.0143946	0.0133598	0.00736854	0.0124941	0.00793571	0.0127356	0.0160699	0.00839196	0.0331317	0.00619713		0.0750164	0.0463761	0.114666	0.044497	0.0556791		0.520026	0.29567	1.36799	0.167429
153	161		873.431	6	13.62-13.64	0.0065694	0.0131565	0.022341	0.0378905	0.086799		-0.00317338	0.0052806	0.00582313	0.0223435	0.0855214	153	161	0.00974279	0.00787587	0.0165179	0.015547	0.00127761		0.0101922		153	161	0.00905846	0.00977065	0.0079102	0.0169734	0.0134866	0.00758507	0.00761891	0.0048199	0.00988433	0.0245393		0.0584567	0.0472552	0.0991075	0.0932821	0.00766567		1.4283	1.101	3.08863	1.37097
159	168		1006.52	8	6.68-6.74	0.130851	0.400347	0.647482	0.697404	0.66658		0.109116	0.416542	0.643731	0.680522	0.68869	159	168	0.0217351	-0.0161946	0.00375149	0.0168821	-0.0221101		0.000812799		159	168	0.00614552	0.011342	0.0101474	0.0149	0.00153153	0.0289799	0.0344157	0.0130004	0.024253	0.0155278		0.173881	-0.129557	0.0300119	0.135057	-0.176881		1.27079	-0.774079	0.394001	1.02727
162	179		2024.04	17	8.68-8.76	0.452433	0.460975	0.457986	0.49582	0.501764		0.428456	0.464361	0.465892	0.499175	0.523357	162	179	0.0239771	-0.00338683	-0.00790597	-0.00335531	-0.0215932		-0.00245284		162	179	0.0191817	0.0151172	0.0123005	0.0177719	0.00733003	0.00776611	0.0155841	0.0151222	0.022261	0.00987524		0.40761	-0.0575761	-0.134401	-0.0570403	-0.367084		2.00682	-0.270185	-0.702478	-0.204022
194	200		936.49	6	7.82-7.87	0.0725214	0.0957637	0.219249	0.460684	0.667169		0.0815687	0.0933736	0.213535	0.47314	0.680042	194	200	-0.00904726	0.00239005	0.00571368	-0.0124552	-0.0128726		-0.00525428		194	200	0.0171124	0.0129017	0.0171129	0.0346127	0.0197299	0.00985348	0.0153823	0.0199294	0.0203483	0.0108478		-0.0542836	0.0143403	0.0342821	-0.0747313	-0.0772358		-0.793572	0.206194	0.37674	-0.537301
196	209		1738.87	13	5.71-5.75	0.0772687	0.0954029	0.118836	0.17693	0.288304		0.0763832	0.097403	0.12279	0.167985	0.286909	196	209	0.000885419	-0.00200011	-0.00395431	0.00894558	0.00139495		0.00105431		196	209	0.00860287	0.00933594	0.00770448	0.00771022	0.0082194	0.0152092	0.00598565	0.0064116	0.0102321	0.0109107		0.0115104	-0.0260015	-0.051406	0.116293	0.0181343		0.0877659	-0.312381	-0.68331	1.20936
221	230		1242.56	9	6.03-6.08	0.126106	0.2207	0.32424	0.451806	0.466129		0.126043	0.217595	0.326107	0.44959	0.455105	221	230	6.30182e-05	0.00310514	-0.0018665	0.00221575	0.0110237		0.00290823		221	230	0.00687562	0.0192748	0.0214768	0.026005	0.0449682	0.0108889	0.0220109	0.0230189	0.0298015	0.0337708		0.000567164	0.0279463	-0.0167985	0.0199418	0.0992134		0.00847578	0.183825	-0.102689	0.0970309
228	237		1278.59	9	5.64-5.66	0.116093	0.112344	0.125705	0.206072	0.316327		0.103515	0.124761	0.132082	0.185831	0.305267	228	237	0.0125779	-0.0124169	-0.00637678	0.0202413	0.0110604		0.00501718		228	237	0.0133655	0.00555539	0.00273615	0.0138418	0.00425954	0.00786982	0.0054403	0.00398988	0.0120471	0.0109489		0.113201	-0.111752	-0.057391	0.182172	0.0995433		1.40459	-2.76594	-2.28298	1.91055
232	243		1374.61	11	9.03-9.08	0.332939	0.366905	0.378604	0.384462	0.389928		0.331469	0.380088	0.380462	0.402748	0.395117	232	243	0.00147069	-0.0131828	-0.00185712	-0.0182866	-0.00518901		-0.00740896		232	243	0	0.00466106	0.0214292	0.000973134	0.0172764	0.0171807	0.00157693	0.0130898	0.00645563	0.00560882		0.0161776	-0.14501	-0.0204284	-0.201152	-0.0570791		0.148266	-4.64034	-0.128097	-4.85149
239	252		1509.7	12	9.23-9.34	0.178303	0.246297	0.296124	0.328722	0.321616		0.172926	0.241821	0.292515	0.336775	0.344416	239	252	0.00537711	0.00447637	0.00360871	-0.00805299	-0.0227998		-0.00347811		239	252	0.00467973	0.0101882	0.00852177	0.0121549	0.0166129	0.0124631	0.00657637	0.011459	0.00623097	0.0150185		0.0645254	0.0537164	0.0433045	-0.0966358	-0.273597		0.699591	0.639377	0.437697	-1.02118
240	251		1281.58	10	10.69-10.75	0.426123	0.445043	0.471732	0.480602	0.472181		0.410735	0.457791	0.454237	0.450446	0.47314	240	251	0.0153881	-0.0127481	0.0174952	0.0301561	-0.000958358		0.0098666		240	251	0.00621164	0.0158919	0.00227448	0.00522552	0.00889731	0.0206904	0.0187579	0.0115343	0.0133294	0.015244		0.153881	-0.127481	0.174952	0.301561	-0.00958358		1.23377	-0.898127	2.57753	3.64822
241	252		1337.65	10	12.15-12.18	0.0320615	0.0172752	0.0291637	0.0465218	0.0504185		0.021831	0.0330642	0.0395448	0.0532697	0.0623097	241	252	0.0102304	-0.015789	-0.010381	-0.00674791	-0.0118912		-0.00691573		241	252	0.0109118	0.00587985	0.00605567	0.00966075	0.00523761	0.0232724	0.00465164	0.00764687	0.00270403	0.00319194		0.102304	-0.15789	-0.10381	-0.0674791	-0.118912		0.689386	-3.64759	-1.84335	-1.16504
242	254		1449.78	11	5.28-5.37	0.0488539	0.063473	0.10156	0.144499	0.193111		0.0524906	0.0650404	0.0924817	0.12965	0.207712	242	254	-0.00363677	-0.00156744	0.0090787	0.0148498	-0.0146011		0.00082464		242	254	0.0071962	0.0134251	0.00671303	0.0247654	0.0205331	0.0138596	0.0103898	0.0261571	0.0396385	0.0204243		-0.0400045	-0.0172418	0.0998657	0.163348	-0.160612		-0.403362	-0.159925	0.582295	0.550302
252	262		1244.64	8	9.61-9.65	0.200741	0.307509	0.375646	0.481235	0.580867		0.207647	0.297095	0.396864	0.488556	0.551237	252	262	-0.00690634	0.0104142	-0.0212185	-0.00732052	0.0296293		0.000919627		252	262	0.0109181	0.0127453	0.0119511	0.00455168	0.0111666	0.00850485	0.018734	0.00572108	0.0142205	0.0355864		-0.0552507	0.0833134	-0.169748	-0.0585642	0.237034		-0.864335	0.796078	-2.77372	-0.849196
253	262		1131.55	7	9.08-9.12	0.271465	0.397569	0.464667	0.548364	0.590299		0.292419	0.405867	0.493429	0.561324	0.61689	253	262	-0.0209542	-0.00829765	-0.0287625	-0.0129595	-0.0265917		-0.0195131		253	262	0.0220612	0.00932559	0.00420597	0.00398102	0.00226205	0.0131953	0.0189599	0.0075435	0.00586333	0.00671173		-0.146679	-0.0580836	-0.201337	-0.0907164	-0.186142		-1.41186	-0.680193	-5.76811	-3.16723
255	267		1488.67	10	8.56-8.60	0.312185	0.357226	0.384237	0.452417	0.518273		0.30642	0.365277	0.398713	0.463247	0.526488	255	267	0.00576478	-0.00805134	-0.0144764	-0.0108301	-0.00821522		-0.00716167		255	267	0.00685552	0.012457	0.01459	0.00785403	0.01006	0.00383299	0.00910851	0.00198776	0.0127593	0.00533821		0.0576478	-0.0805134	-0.144764	-0.108301	-0.0821522		1.27126	-0.903672	-1.70284	-1.25199
257	267		1292.55	9	10.11-10.21	0.0525894	0.0610896	0.096009	0.120491	0.197987		0.0495443	0.0782381	0.10466	0.116125	0.171515	257	267	0.00304511	-0.0171486	-0.00865075	0.00436617	0.0264723		0.00161685		257	267	0.0118627	0.0151905	0.00640514	0.00863864	0.0096607	0.0115645	0.00846318	0.00547264	0.0169471	0.00262587		0.027406	-0.154337	-0.0778567	0.0392955	0.238251		0.318363	-1.7081	-1.77852	0.397566
258	267		1177.52	8	12.35-12.39	0.333059	0.445282	0.500554	0.60345	0.690403		0.324599	0.444885	0.494742	0.601043	0.682503	258	267	0.00846063	0.000397015	0.00581175	0.0024069	0.00789981		0.00499522		258	267	0.0194004	0.0225177	0.0194593	0.0274929	0.0228819	0.0236813	0.021028	0.0245187	0.0249696	0.0296257		0.0676851	0.00317612	0.046494	0.0192552	0.0631985		0.478687	0.0223194	0.321583	0.112249
288	306		2098.13	15	5.48-5.61	0.126434	0.148223	0.180852	0.198078	0.195277		0.131181	0.169125	0.185157	0.192111	0.206086	288	306	-0.00474756	-0.0209024	-0.00430458	0.00596706	-0.0108091		-0.0069593		288	306	0.0133994	0.0118996	0.0119431	0.0117203	0.0127395	0.00885284	0.0057192	0.00984776	0.0101658	0.0125379		-0.0712134	-0.313536	-0.0645687	0.089506	-0.162136		-0.512025	-2.74218	-0.481652	0.666156
297	309		1473.83	10	9.09-9.13	0.194854	0.290742	0.359239	0.427091	0.567155		0.181442	0.30405	0.368293	0.417043	0.536115	297	309	0.0134121	-0.0133075	-0.00905358	0.0100473	0.0310401		0.0064277		297	309	0.00431761	0.0213194	0.00442881	0.000764776	0.000787761	0.00344925	0.0157191	0.0100064	0.0204245	0.00858373		0.134121	-0.133075	-0.0905358	0.100473	0.310401		4.20367	-0.87018	-1.43303	0.851443
322	333		1455.78	11	9.32-9.37	0.135273	0.18287	0.223577	0.355187	0.546123		0.129804	0.176453	0.216574	0.340262	0.528329	322	333	0.00546811	0.0064171	0.00700339	0.0149242	0.0177938		0.0103213		322	333	0.0238313	0.0243639	0.025838	0.0246071	0.0257845	0.0256634	0.025246	0.0279863	0.0240153	0.0239395		0.0601493	0.0705881	0.0770373	0.164166	0.195731		0.270431	0.316794	0.318464	0.751791
334	349		1855.97	14	10.81-10.87	0.0825467	0.134854	0.18255	0.311638	0.486486		0.094839	0.143132	0.205332	0.313888	0.478066	334	349	-0.0122923	-0.00827825	-0.0227824	-0.00225053	0.0084193		-0.00743684		334	349	0.0103068	0.00177857	0.0104617	0.00646461	0.0102388	0.00548625	0.00478945	0.00723849	0.0136168	0.00368454		-0.172093	-0.115896	-0.318954	-0.0315075	0.11787		-1.82347	-2.80648	-3.10179	-0.258602
334	351		2098.1	16	12.18-12.26	0.0646346	0.102688	0.158412	0.298659	0.473915		0.065316	0.111388	0.168658	0.280949	0.4647	334	351	-0.000681437	-0.00870056	-0.0102454	0.0177099	0.00921446		0.00145938		334	351	0.0189409	0.00992976	0.0143493	0.0145799	0.012423	0.0195198	0.0249792	0.0255154	0.020698	0.0146129		-0.010903	-0.139209	-0.163927	0.283358	0.147431		-0.0433946	-0.560623	-0.606201	1.21158
337	351		1753.91	13	12.62-12.67	0.0827145	0.125541	0.191189	0.322151	0.500135		0.0820173	0.127058	0.194225	0.298363	0.474123	337	351	0.00069713	-0.0015178	-0.00303559	0.0237875	0.0260124		0.00918873		337	351	0.00917279	0.00881952	0.00935741	0.00183169	0.00966005	0.00378014	0.0123994	0.0057698	0.0144658	0.009493		0.00906269	-0.0197313	-0.0394627	0.309237	0.338161		0.121706	-0.172771	-0.478275	2.82562
352	364		1517.77	11	10.63-10.72	0.115739	0.154034	0.247321	0.32746	0.452918		0.113428	0.191969	0.257745	0.322146	0.450582	352	364	0.00231153	-0.0379349	-0.010424	0.0053137	0.00233596		-0.00767954		352	364	0.00227544	0.0112153	0.0154995	0.0167	0.00543528	0.00594261	0.013667	0.00691018	0.0093171	0.00176309		0.0254269	-0.417284	-0.114664	0.0584507	0.0256955		0.62918	-3.71642	-1.06393	0.481279
365	384		2346.27	18	8.87-8.98	0.119938	0.1421	0.155145	0.195014	0.258816		0.117348	0.148567	0.16874	0.203267	0.25494	365	384	0.0025898	-0.00646633	-0.0135947	-0.00825332	0.00387579		-0.00436975		365	384	0.0079262	0.0052296	0.00749196	0.00497993	0.00598698	0.0131957	0.0108875	0.00656584	0.00194121	0.00864627		0.0466164	-0.116394	-0.244704	-0.14856	0.0697642		0.291406	-0.927283	-2.36367	-2.67454
385	391		848.338	6	4.54-4.55	0.13603	0.199658	0.257432	0.334188	0.418544		0.101092	0.197293	0.256013	0.27212	0.414648	385	391	0.0349388	0.00236567	0.00141915	0.0620674	0.00389627		0.0209375		385	391	0.00439378	0.00112214	0.00275572	0.00779254	0.0268985	0.0152035	0.00344154	0.00918657	0.0148358	0.0288167		0.209633	0.014194	0.00851493	0.372404	0.0233776		3.82391	1.13194	0.256287	6.41514
385	392		961.422	7	7.01-7.06	0.0956277	0.149998	0.186801	0.240236	0.332114		0.0935458	0.157801	0.18599	0.213673	0.306349	385	392	0.00208188	-0.00780299	0.000811514	0.0265627	0.0257646		0.00948354		385	392	0.000802345	0.00958252	0.00607889	0.00657271	0.00379872	0.00323497	0.0150316	0.00521812	0.0211081	0.0109561		0.0145731	-0.0546209	0.0056806	0.185939	0.180352		1.08189	-0.758164	0.175449	2.08108
403	415		1568.8	12	6.19-6.20	0.064849	0.163686	0.264983	0.497518	0.649803		0.0832546	0.170525	0.282044	0.515311	0.658017	403	415	-0.0184056	-0.00683868	-0.0170608	-0.0177924	-0.00821455		-0.0136624		403	415	0.00801965	0.00628097	0.00591617	0.00216779	0.0114371	0.0109708	0.00346729	0.00339652	0.00679627	0.00774925		-0.220867	-0.0820642	-0.20473	-0.213509	-0.0985746		-2.3459	-1.65099	-4.33171	-4.32002
426	435		1005.48	9	13.30-13.32	0.0136771	0.0490595	0.127828	0.177201	0.226535		0.0144735	0.0528852	0.119393	0.192501	0.224965	426	435	-0.000796352	-0.0038257	0.00843566	-0.0153003	0.00156982		-0.00198338		426	435	0.00420481	0.0102075	0.00469453	0.00668607	0.00934677	0.0131844	0.0113507	0.00705207	0.0116789	0.0148436		-0.00716716	-0.0344313	0.0759209	-0.137703	0.0141284		-0.0996714	-0.434075	1.72467	-1.96925
429	439		1091.5	10	6.54-6.55	0.662631	0.673631	0.663549	0.664054	0.6621		0.67755	0.654763	0.668154	0.637652	0.629597	429	439	-0.0149187	0.0188676	-0.00460507	0.0264025	0.0325028		0.0116499		429	439	0.00347821	0.00219836	0.0141434	0.0120157	0.00381	0.0203867	0.0149385	0.020817	0.00999985	0.0232239		-0.149187	0.188676	-0.0460507	0.264025	0.325028		-1.24943	2.1643	-0.31693	2.92536
438	444		749.331	6	5.58-5.59	0.582255	0.592162	0.581062	0.575728	0.583872		0.597279	0.583449	0.565698	0.592458	0.563928	438	444	-0.0150239	0.00871294	0.0153639	-0.0167301	0.0199438		0.00245333		438	444	0.00920373	0.000848756	0	0.00625821	0.00864403	0.000126368	0.0238408	0.00238657	0.0138179	0.0131		-0.0901433	0.0522776	0.0921836	-0.100381	0.119663		-2.82708	0.6326	11.1504	-1.9103
445	470		2647.38	19	8.47-8.51	0.672305	0.65689	0.658036	0.675552	0.666293		0.642061	0.672661	0.678751	0.685502	0.671163	445	470	0.0302441	-0.015771	-0.0207145	-0.00995004	-0.00486991		-0.00421229		445	470	0.0109587	0.0100477	0.0133667	0.0086055	0.00775059	0.0152024	0.00630487	0.0111775	0.00800605	0.0083249		0.574637	-0.299649	-0.393576	-0.189051	-0.0925284		2.79525	-2.30283	-2.05912	-1.46625
449	465		1720.95	11	7.24-7.29	0.313926	0.370016	0.377873	0.397999	0.420743		0.31891	0.386095	0.391946	0.418088	0.440454	449	465	-0.00498385	-0.0160787	-0.0140733	-0.0200887	-0.0197111		-0.0149871		449	465	0.0160408	0.00727992	0.00784925	0.00902374	0.00880868	0.0203038	0.0102666	0.0079445	0.0127194	0.0101715		-0.0548224	-0.176866	-0.154806	-0.220976	-0.216822		-0.333606	-2.21275	-2.18262	-2.23111
471	477		821.371	6	8.34-8.36	0.100211	0.137738	0.146833	0.189776	0.346773		0.0971833	0.13506	0.14399	0.201245	0.350366	471	477	0.00302736	0.00267786	0.00284328	-0.0114694	-0.00359328		-0.00130284		471	477	0.0057607	0.00154677	0.0039107	0.00768383	0.00575697	0.00268582	0.0055505	0.00585348	0.0111627	0.00861144		0.0181642	0.0160672	0.0170597	-0.0688164	-0.0215597		0.824971	0.804964	0.699567	-1.46592
478	489		1352.74	11	8.90-8.98	0.0714866	0.134827	0.145913	0.218186	0.274223		0.0804488	0.125442	0.161537	0.220463	0.288207	478	489	-0.00896228	0.00938494	-0.0156239	-0.00227734	-0.0139845		-0.00629262		478	489	0.00716581	0.00787761	0.00618711	0.00754966	0.0185468	0.0116931	0.0161734	0.0160362	0.0128212	0.0142364		-0.0985851	0.103234	-0.171863	-0.0250507	-0.15383		-1.13191	0.903574	-1.5744	-0.265106
480	489		1092.58	9	5.81-5.85	0.121971	0.184433	0.204968	0.28535	0.335159		0.115541	0.179156	0.209939	0.275678	0.344939	480	489	0.00642968	0.00527645	-0.00497131	0.00967197	-0.00977993		0.00132537		480	489	0.0114947	0.0107108	0.00993864	0.0124156	0.012494	0.0153234	0.0164904	0.0114257	0.0117544	0.0104987		0.0578672	0.0474881	-0.0447418	0.0870478	-0.0880194		0.581375	0.464774	-0.568601	0.979833
494	504		1446.62	10	13.46-13.48	0.0206697	0.0595045	0.135787	0.19369	0.298705		0.0185899	0.0581173	0.13943	0.197935	0.294227	494	504	0.00207985	0.00138716	-0.00364328	-0.00424582	0.00447791		1.11642e-05		494	504	0.0130469	0.00354045	0.00500418	0.00458478	0.00992119	0.0101252	0.0086009	0.00337254	0.0144706	0.00595254		0.0207985	0.0138716	-0.0364328	-0.0424582	0.0447791		0.218131	0.258318	-1.0457	-0.484467
496	507		1441.62	11	8.96-8.98	0.447306	0.558743	0.625397	0.725366	0.742498		0.455881	0.5613	0.637946	0.722465	0.747423	496	507	-0.0085749	-0.00255658	-0.012549	0.00290081	-0.00492551		-0.00514103		496	507	0.00976024	0.0102954	0.0202442	0.0115178	0.00571995	0.00343311	0.00715848	0.00698657	0.0167003	0.00320936		-0.0943239	-0.0281224	-0.138039	0.031909	-0.0541806		-1.43549	-0.353135	-1.01492	0.247665
501	517		2123.88	15	6.37-6.41	0.224819	0.301211	0.362476	0.391024	0.416884		0.209882	0.3209	0.376302	0.390069	0.434713	501	517	0.0149371	-0.0196895	-0.0138257	0.000954826	-0.0178287		-0.00709037		501	517	0.0039998	0.0110174	0.0007399	0.0147152	0.00903154	0.0110904	0.00411493	0.00383751	0.0195808	0.0235329		0.224057	-0.295342	-0.207385	0.0143224	-0.26743		2.19445	-2.89973	-6.12733	0.0675195
507	523		2202.1	15	7.16-7.20	0.114158	0.137666	0.161982	0.2017	0.300887		0.115235	0.123638	0.149235	0.190736	0.285765	507	523	-0.00107682	0.0140283	0.0127472	0.0109641	0.0151224		0.010357		507	523	0.000496119	0.0257767	0	0.0127568	0.00441393	0.0162019	0.00474607	0.0183765	0.00685184	0.00896229		-0.0161522	0.210424	0.191207	0.164461	0.226836		-0.115062	0.927038	1.20146	1.31145
526	536		1214.72	10	8.03-8.09	0.188546	0.314117	0.415512	0.582598	0.633296		0.175168	0.317783	0.416185	0.576755	0.634241	526	536	0.0133781	-0.00366597	-0.000672537	0.00584299	-0.000945821		0.00278734		526	536	0.0129452	0.00539134	0.0040009	0.00857836	0.00725522	0.00989388	0.00424149	0.00795328	0.00968537	0.00330269		0.133781	-0.0366597	-0.00672537	0.0584299	-0.00945821		1.42216	-0.925632	-0.130841	0.782212
530	542		1488.87	12	8.28-8.39	0.24417	0.462731	0.586092	0.647155	0.681806		0.229504	0.45304	0.573722	0.617827	0.66701	530	542	0.0146662	0.00969117	0.0123698	0.0293275	0.0147955		0.01617		530	542	0.00334639	0.0140534	0.00315833	0.00886505	0.00482886	0.0170583	0.0225014	0.0143772	0.0127641	0.0149284		0.175994	0.116294	0.148437	0.35193	0.177546		1.4613	0.632717	1.4555	3.26864
562	572		1345.73	10	5.31-5.33	0.0623479	0.0805084	0.0963836	0.15291	0.267737		0.0562997	0.0717315	0.109651	0.142841	0.263685	562	572	0.00604821	0.00877687	-0.0132679	0.010069	0.00405239		0.0031357		562	572	0.00280522	0.0136624	0.00385627	0.00807104	0.00235358	0.00593642	0.00726179	0.00408925	0.0203331	0.0094197		0.0604821	0.0877687	-0.132679	0.10069	0.0405239		1.5955	0.982524	-4.08855	0.797202
574	585		1345.68	11	10.04-10.08	0.351582	0.415187	0.518702	0.609727	0.605095		0.336966	0.430952	0.525221	0.599987	0.596053	574	585	0.0146157	-0.0157643	-0.00651913	0.00973962	0.00904247		0.00222288		574	585	0.00547042	0.012154	0	0.00347042	0.0039384	0.000273406	0.0184009	0.00798765	0.0149653	0.00678223		0.160773	-0.173407	-0.0717104	0.107136	0.0994672		4.62188	-1.23816	-1.41362	1.09811
581	587		836.382	6	6.82-6.85	0.463516	0.552012	0.550474	0.546501	0.562727		0.439453	0.535049	0.544489	0.515	0.547652	581	587	0.0240624	0.0169629	0.00598458	0.0315012	0.0150746		0.0187172		581	587	0.0109485	0.00469677	0.021755	0.0248328	0.021104	0.0121336	0.0130065	0.016942	0.00506542	0.00775896		0.144375	0.101778	0.0359075	0.189007	0.0904478		2.55017	2.12464	0.375922	2.15283
591	608		2013.21	13	10.94-10.99	0.128058	0.260528	0.44205	0.701856	0.771072		0.125142	0.266529	0.452924	0.724335	0.774807	591	608	0.00291688	-0.0060008	-0.0108737	-0.0224786	-0.00373513		-0.00803428		591	608	0.0123817	0.0137792	0.00670746	0.00992985	0.0402917	0.0102137	0.0119184	0.012962	0.00739001	0.0254499		0.0379194	-0.0780104	-0.141358	-0.292222	-0.0485567		0.314763	-0.570502	-1.29046	-3.14544
591	611		2298.38	16	11.57-11.63	0.13062	0.319571	0.509271	0.716161	0.781374		0.132737	0.320965	0.516989	0.704132	0.78761	591	611	-0.00211679	-0.00139412	-0.00771838	0.0120298	-0.00623638		-0.00108718		591	611	0.00586726	0.00793815	0.00527341	0.00178713	0.011344	0.00542603	0.00428862	0.00996819	0.00796931	0.00642668		-0.0338687	-0.022306	-0.123494	0.192476	-0.0997821		-0.458778	-0.267628	-1.18546	2.55119
605	616		1290.73	10	9.03-9.10	0.164316	0.243002	0.32405	0.372932	0.399529		0.172602	0.238986	0.30238	0.357445	0.409249	605	616	-0.00828552	0.00401627	0.0216693	0.015487	-0.00972075		0.00463325		605	616	0.0130191	0.0103072	0.0123678	0.00794746	0.0220299	0.0156894	0.0142315	0.0123127	0.0236652	0.0114176		-0.0828552	0.0401627	0.216693	0.15487	-0.0972075		-0.703905	0.39588	2.15063	1.07452
612	621		1105.61	8	10.47-10.54	0.234105	0.355963	0.4562	0.568989	0.645888		0.23376	0.354519	0.458244	0.572906	0.635783	612	621	0.00034459	0.00144403	-0.00204403	-0.0039166	0.010105		0.0011866		612	621	0.0147567	0.0112869	0.0136226	0.0125771	0.0109263	0.0190882	0.0164696	0.0128259	0.00871175	0.0183826		0.00275672	0.0115522	-0.0163522	-0.0313328	0.0808403		0.0247375	0.125269	-0.189219	-0.443395
621	631		1304.65	10	8.76-8.81	0.250238	0.37497	0.402638	0.484079	0.575633		0.258524	0.353808	0.40523	0.495378	0.569478	621	631	-0.00828627	0.0211625	-0.00259194	-0.0112994	0.00615478		0.00102794		621	631	0.00835552	0	0.00617269	0.00837418	0.0139315	0.00425269	0.022314	0.00443239	3.39364e-14	0.0124664		-0.0828627	0.211625	-0.0259194	-0.112994	0.0615478		-1.53082	1.64267	-0.590768	-2.33708
632	641		1140.6	8	8.70-8.76	0.0538254	0.0476246	0.0496362	0.0919494	0.134201		0.0433049	0.0448778	0.0668715	0.0710845	0.118125	632	641	0.0105205	0.00274683	-0.0172353	0.0208649	0.0160765		0.0065947		632	641	0.00772313	0.0137832	0.0158655	0.0111821	0.0125776	0.00331698	0.00831679	0.0278396	0.00111399	0.00659235		0.0841642	0.0219746	-0.137882	0.166919	0.128612		2.16793	0.295543	-0.931634	3.21596
641	648		998.599	7	10.60-10.67	0.0537279	0.0871162	0.11722	0.133497	0.164838		0.0432083	0.0691443	0.111928	0.106448	0.148904	641	648	0.0105196	0.0179719	0.00529232	0.0270493	0.0159335		0.0153533		641	648	0.012174	0.0114294	0.0120333	0.00892623	0.00856162	0.0117013	0.0178448	0.0127235	0.00916247	0.0147584		0.0736373	0.125803	0.0370463	0.189345	0.111534		1.07905	1.46892	0.523432	3.66258
642	648		885.515	6	10.16-10.23	0.0181396	0.0293358	0.0366323	0.0509562	0.0704532		0.0264861	0.0337709	0.032048	0.0469726	0.0661	642	648	-0.00834652	-0.00443507	0.00458433	0.00398358	0.00435323		2.79104e-05		642	648	0	0.00373657	0	0.0038398	0.00249975	0.0030194	0.00226194	0.00278308	0.00695945	0.00343433		-0.0500791	-0.0266104	0.027506	0.0239015	0.0261194		-4.7879	-1.7587	2.85305	0.868063
653	664		1487.83	11	8.78-8.86	0.0459176	0.0734677	0.0920615	0.168977	0.253818		0.0585469	0.0746908	0.0969559	0.147789	0.258042	653	664	-0.0126293	-0.00122307	-0.00489444	0.0211881	-0.00422429		-0.000356608		653	664	0.00967856	0.00754708	0.00832592	0.00549539	0.00899335	0.00738697	0.0138362	0.02724	0.0210729	0.00734464		-0.138922	-0.0134537	-0.0538388	0.233069	-0.0464672		-1.79661	-0.134411	-0.29762	1.68516
654	663		1259.71	9	7.39-7.45	0.0261405	0.0169783	0.0415629	0.160289	0.234524		0.0492315	0.0587544	0.0631012	0.132911	0.233791	654	663	-0.023091	-0.0417761	-0.0215383	0.0273781	0.000733002		-0.0116589		654	663	0.00503665	0.00547081	0.00465439	0.00686418	0.00687148	0.00923284	0.0143788	0.0214761	0.0172401	0.0149184		-0.207819	-0.375985	-0.193845	0.246403	0.00659701		-3.80278	-4.70337	-1.69765	2.55547
664	673		1189.72	8	10.33-10.40	0.0377457	0.0318711	0.0586037	0.182639	0.29511		0.0457638	0.0622741	0.0848168	0.158439	0.259666	664	673	-0.0080181	-0.030403	-0.0262131	0.0242	0.0354435		-0.000998134		664	673	0.0134295	0.00917649	0.0156586	0.00942537	0.01232	0.0158015	0.0108726	0.0127655	0.00610821	0.0197386		-0.0641448	-0.243224	-0.209704	0.1936	0.283548		-0.669697	-3.70126	-2.24734	3.73195
685	692		842.462	6	7.44-7.45	0.128776	0.188463	0.218313	0.240676	0.359448		0.123779	0.199702	0.21359	0.245056	0.346747	685	692	0.00499726	-0.0112391	0.00472338	-0.00438035	0.0127007		0.0013604		685	692	0	0.0121918	0.00566393	0.000826119	0	0.00987214	0.00181766	0.00930398	0.0036194	0.00426642		0.0299836	-0.0674343	0.0283403	-0.0262821	0.0762045		0.876762	-1.57924	0.751088	-2.04364
685	694		1054.61	8	10.97-11.00	0.0542177	0.106218	0.120259	0.139232	0.244254		0.0693983	0.115346	0.134402	0.145033	0.235652	685	694	-0.0151806	-0.00912799	-0.0141431	-0.00580112	0.00860187		-0.00713019		685	694	0.0240761	0.0093916	0.0141321	0.0166778	0.0117354	0.00747929	0.00981437	0.0098791	0.00964907	0.0168599		-0.121445	-0.0730239	-0.113145	-0.046409	0.0688149		-1.04294	-1.16388	-1.42069	-0.521479
693	703		1222.6	10	10.55-10.58	0.068339	0.153821	0.28019	0.438014	0.510849		0.066739	0.157181	0.27827	0.431132	0.496706	693	703	0.0016	-0.00336	0.0019206	0.00688239	0.0141436		0.00423731		693	703	0.00732239	0.00663687	0.0105288	0.00462597	0.0026497	0.00353806	0.00570731	0.0025106	0.0085594	0.00539851		0.016	-0.0336	0.019206	0.0688239	0.141436		0.340772	-0.664852	0.307333	1.22521
704	719		1707.84	13	7.35-7.38	0.234272	0.303771	0.3482	0.438932	0.487379		0.238627	0.317994	0.35428	0.417442	0.479986	704	719	-0.00435476	-0.0142227	-0.00608048	0.0214898	0.007393		0.00084496		704	719	0.00486418	0.00548175	0.00655109	0.00620551	0.00425522	0.00168726	0.00481412	0.00523352	0.0116846	0.006193		-0.0566119	-0.184896	-0.0790463	0.279367	0.096109		-1.46502	-3.37664	-1.25603	2.81336
704	720		1836.89	14	7.24-7.28	0.276993	0.337514	0.378983	0.45685	0.514984		0.281081	0.344851	0.37764	0.443894	0.506799	704	720	-0.00408817	-0.00733753	0.00134328	0.012956	0.00818507		0.00221173		704	720	0.0102622	0.0142189	0.0140346	0.0103053	0.00866631	0.0141519	0.00768955	0.00841023	0.018022	0.0081065		-0.0572343	-0.102725	0.018806	0.181384	0.114591		-0.405061	-0.786205	0.142201	1.08093
709	718		971.443	7	10.41-10.46	0.0145701	0.0521384	0.115496	0.190891	0.270439		0.00789574	0.0630032	0.117653	0.182122	0.29613	709	718	0.00667441	-0.0108648	-0.00215778	0.00876887	-0.0256913		-0.00465412		709	718	0.0128002	0.0116695	0.00957015	0.00926034	0.0104823	0.0133156	0.00926205	0.00983902	0.0117264	0.0138309		0.0467209	-0.0760537	-0.0151045	0.0613821	-0.179839		0.625895	-1.26311	-0.272292	1.01647
725	731		727.344	6	5.15-5.16	0.0572771	0.0580107	0.081841	0.0698102	0.0718995		0.0677333	0.0674928	0.0721326	0.060792	0.058398	725	731	-0.0104562	-0.00948209	0.00970846	0.00901816	0.0135015		0.00245796		725	731	0.00717338	0.00923483	0.00333731	0.0156082	0.0180694	0.0137622	0.00285124	0.0230015	0.0167572	0.0188993		-0.0627373	-0.0568925	0.0582507	0.054109	0.081009		-1.16696	-1.69928	0.723488	0.682085
734	749		1797.99	15	12.14-12.25	0.0757754	0.157326	0.25568	0.299608	0.314603		0.0685869	0.155501	0.270156	0.308731	0.326452	734	749	0.00718856	0.00182458	-0.0144753	-0.00912279	-0.0118491		-0.00528681		734	749	0.00569632	0.00475771	0.012891	0.0101484	0.0106815	0.00559045	0.00960378	0.016086	0.00608109	0.0152373		0.107828	0.0273687	-0.21713	-0.136842	-0.177736		1.56001	0.294865	-1.21626	-1.33559
736	745		1130.6	9	6.60-6.64	0.166719	0.242756	0.288531	0.409226	0.522622		0.149131	0.235982	0.296783	0.406543	0.525576	736	745	0.0175882	0.00677396	-0.00825224	0.00268226	-0.00295439		0.00316756		736	745	0.0032607	0.00254362	0.00577877	0.00350796	0.00423947	0.00512338	0.0114425	0.0083995	0.00371957	0.00540962		0.158294	0.0609657	-0.0742701	0.0241403	-0.0265896		5.01626	1.00095	-1.40194	0.908657
737	749		1484.79	12	10.24-10.30	0.0716404	0.0930484	0.104983	0.130621	0.228539		0.0779073	0.101229	0.0962886	0.132403	0.216987	737	749	-0.00626692	-0.00818047	0.00869428	-0.00178246	0.0115524		0.000803358		737	749	0.0104439	0.011424	0.0112493	0.00959577	0.00976766	0.0111154	0.0116647	0.0113683	0.0112958	0.00935137		-0.075203	-0.0981657	0.104331	-0.0213896	0.138628		-0.711678	-0.867823	0.941581	-0.208302
737	751		1710.95	14	12.17-12.29	0.0708325	0.0779821	0.0893191	0.115509	0.204106		0.0679068	0.0831962	0.0940245	0.107706	0.192583	737	751	0.00292569	-0.00521407	-0.00470544	0.00780384	0.0115233		0.00246667		737	751	0.0112302	0.0076338	0.0102102	0.0110698	0.0090806	0.00819925	0.0140272	0.0100366	0.0162221	0.010728		0.0409597	-0.072997	-0.0658761	0.109254	0.161327		0.364438	-0.565505	-0.56925	0.68825
750	757		873.577	7	6.83-6.89	0.120328	0.159854	0.163458	0.17207	0.185002		0.103697	0.146973	0.150493	0.139667	0.146525	750	757	0.0166307	0.0128804	0.0129642	0.0324036	0.038477		0.0226712		750	757	0.00265991	0.00876674	0.00116588	0.00718571	0.00881258	0.00544009	0.0165872	0.00920576	0.0208288	0.0212631		0.116415	0.0901627	0.0907493	0.226825	0.269339		4.75683	1.18911	2.41986	2.54725
751	757		760.493	6	5.44-5.47	0.134341	0.157485	0.175778	0.187648	0.190118		0.119053	0.150074	0.15723	0.13836	0.145536	751	757	0.0152881	0.00741144	0.018548	0.0492876	0.0445821		0.0270234		751	757	0.00585249	0.00835522	0.00661119	0.00748109	0.011654	0.00943209	0.00262811	0.0197187	0.00308532	0.00662388		0.0917284	0.0444687	0.111288	0.295725	0.267493		2.3855	1.46561	1.54471	10.5493
751	762		1419.8	11	10.54-10.69	0.0435402	0.0581745	0.0718856	0.0917387	0.10765		0.0486499	0.0604806	0.0833012	0.0726966	0.0943719	751	762	-0.00510977	-0.00230611	-0.0114156	0.0190421	0.0132779		0.00269769		751	762	0.0118901	0.0113681	0.0118209	0.0136114	0.0128767	0.0150767	0.0175198	0.0145938	0.0195697	0.0137612		-0.0562075	-0.0253672	-0.125572	0.209463	0.146057		-0.460932	-0.191253	-1.05281	1.38359
751	763		1476.82	12	10.21-10.33	0.0398206	0.0499109	0.0690553	0.111914	0.159729		0.0495489	0.0680578	0.0847611	0.107135	0.136806	751	763	-0.00972823	-0.0181469	-0.0157057	0.00477898	0.0229229		-0.0031758		751	763	0.0163245	0.0133466	0.011056	0.0143874	0.0155294	0.0161854	0.00949366	0.0213424	0.0186644	0.0139903		-0.116739	-0.217763	-0.188469	0.0573478	0.275075		-0.732975	-1.91904	-1.13176	0.351244
764	771		961.547	6	6.60-6.65	0.239624	0.346371	0.388732	0.512178	0.6577		0.220902	0.338773	0.378705	0.521875	0.68163	764	771	0.0187224	0.00759876	0.0100269	-0.00969627	-0.0239299		0.000544378		764	771	0.0106915	0.0225361	0.0112224	0.0211933	0.00858731	0.0023806	0.015198	0.0211883	0.00740572	0.023652		0.112334	0.0455925	0.0601612	-0.0581776	-0.143579		2.96056	0.484199	0.724327	-0.748083
773	782		1166.66	6	6.85-6.93	0.482558	0.707386	0.801602	0.848959	0.847865		0.439344	0.752604	0.811635	0.885289	0.8444	773	782	0.0432134	-0.0452177	-0.0100328	-0.0363296	0.00346517		-0.0089803		773	782	0.00302189	0.0186891	0	0.0186639	0.00242637	0.0144706	0.00888955	0.0119721	0	0.00307687		0.259281	-0.271306	-0.060197	-0.217978	0.020791		5.06317	-3.78436	-1.45149	-3.37146
780	797		2044.86	17	8.00-8.04	0.193383	0.244763	0.280513	0.343913	0.453713		0.191347	0.248155	0.283773	0.314265	0.443482	780	797	0.00203591	-0.00339148	-0.00326005	0.0296478	0.0102306		0.00705257		780	797	0.00193108	0.00467164	0	0.00290009	0.00154241	0	0.00776251	0.00704662	0.0153019	0.00583881		0.0346104	-0.0576552	-0.0554209	0.504013	0.173921		1.82608	-0.64838	-0.801317	3.29719
808	815		1058.59	7	6.30-6.39	0.0629738	0.117794	0.156633	0.297675	0.383107		0.0634763	0.109683	0.139302	0.291595	0.34847	808	815	-0.000502559	0.00811151	0.0173309	0.0060806	0.0346373		0.0131316		808	815	0.0119418	0.00867441	0.0111486	0.00833284	0.0124574	0.0110303	0.0109896	0.0134797	0.0128859	0.0111354		-0.00351791	0.0567806	0.121316	0.0425642	0.242461		-0.0535452	1.0035	1.71603	0.68632
808	820		1658.95	12	8.89-8.97	0.30641	0.447387	0.504242	0.528008	0.523896		0.301984	0.461405	0.514516	0.523697	0.527994	808	820	0.00442575	-0.0140183	-0.0102738	0.0043107	-0.00409813		-0.00393075		808	820	0.0120591	0.0274821	0.01873	0.0122231	0.0183685	0.0113369	0.0253047	0.0194381	0.0150618	0.0170986		0.053109	-0.168219	-0.123285	0.0517284	-0.0491776		0.463141	-0.649944	-0.65922	0.384913
850	856		762.352	6	6.68-6.73	0.0183734	0.0255955	0.0272898	0.0287614	0.0559908		0.00867711	0.0259206	0.0213637	0.0310343	0.0501067	850	856	0.00969627	-0.000325124	0.00592612	-0.00227289	0.00588408		0.00378169		850	856	0.00170199	0.00615672	0.00778333	0.0111632	0.00978905	0.0117488	0.00778831	0.0161607	0.0100659	0.0179331		0.0581776	-0.00195075	0.0355567	-0.0136373	0.0353045		1.4147	-0.0567222	0.572233	-0.261904
851	862		1408.6	11	10.83-10.87	0.0460307	0.0663248	0.0743471	0.120357	0.193322		0.0504031	0.0651046	0.0844376	0.106381	0.187355	851	862	-0.00437246	0.00122022	-0.0100905	0.0139761	0.00596676		0.00134003		851	862	0.00259986	0.00866147	0.00339634	0.0063886	0.00603202	0.00409172	0.00783799	0.0132711	0.00843433	0.00904016		-0.048097	0.0134224	-0.110996	0.153737	0.0656343		-1.56221	0.180927	-1.27582	2.28787
867	883		1908.05	16	5.95-5.99	0.115427	0.156166	0.19596	0.214732	0.234398		0.106831	0.159378	0.204546	0.228399	0.250566	867	883	0.00859636	-0.00321241	-0.00858573	-0.0136669	-0.0161673		-0.00660718		867	883	0.0127376	0.01332	0.0115292	0.0105088	0.0117171	0.00981819	0.0120187	0.00966138	0.0149576	0.00867304		0.137542	-0.0513985	-0.137372	-0.21867	-0.258676		0.925816	-0.310134	-0.98862	-1.29494
874	884		1361.72	10	8.40-8.45	0.599471	0.610148	0.622115	0.633323	0.644314		0.548675	0.569805	0.603773	0.630369	0.64081	874	884	0.0507961	0.0403434	0.0183424	0.00295388	0.00350433		0.023188		874	884	0.00270015	0.0136245	0.00428985	0.0256997	0.0179578	0.0171987	0.0254754	0.0203419	0.00654567	3.39364e-14		0.507961	0.403434	0.183424	0.0295388	0.0350433		5.0537	2.41874	1.52818	0.19292
[truncated: 10 more columns]

## Sheet: Vps15 Summary
				Date:			22.11.19		SD	0.0128709															Unhide														for STDEV	Threshold Value=		0.5
Global Color scale				Experiment date:			27.09.16			-0.00223829																														Threshold percent		0.02
0.1	0.35	0.7		Protein:			VPS15																																	t-threshold		2.776
				Instrument:			Waters Synapt G2 Si										-0.1	-0.05	-0.02	0.02	0.05	0.1
																													STDEVS					STDEVS
		Max Frac Deut		0.67		a	Apo					b	Lipids						% Differences (Apo - With Lipids)										a	Apo				b	Lipids					Differences in Daltons (Differences >+/- 0.5Da Highlighted						t-test	*=assumes triplicate values, a p=0.05 test
Start	End	Mod	m/z	#D	RT	0.005	0.05	0.5	5	50		0.005	0.05	0.5	5	50	Start	End	0.005	0.05	0.5	5	50		avg		Start	End	0.005	0.05	0.5	5	50	0.005	0.05	0.5	5	50		0.005	0.05	0.5	5	50		0.005	0.05	0.5	5
20	28		1172.49	8	13.30-13.32	0.0353918	0.0791261	0.169452	0.244826	0.272138		0.0323155	0.0711679	0.144346	0.259491	0.280215	20	28	0.003	0.00795821	0.0251062	-0.0146657	-0.00807761		0.00266422		20	28	0.0148246	0.0133358	0.0306146	0.00408302	0.0253647	0.00505373	0.0122905	0.018136	0.00531138	0.010814		0.024	0.0636657	0.200849	-0.117325	-0.0646209		0.340199	0.760053	1.22207	-3.79164
21	29		1140.45	8	10.41-10.48	0.0994306	0.136244	0.200787	0.336487	0.481013		0.102034	0.154101	0.197621	0.336939	0.468917	21	29	-0.00260336	-0.0178571	0.00316642	-0.000451493	0.0120959		-0.00112993		21	29	0.0299021	0.0320108	0.0287282	0.00875373	0.0124662	0.00804664	0.0139334	0.0126731	0.0176144	0.00527649		-0.0208269	-0.142857	0.0253313	-0.00361194	0.0967672		-0.145617	-0.88593	0.174666	-0.0397572
28	37		1173.59	9	8.15-8.21	0.292858	0.351977	0.41921	0.475459	0.576848		0.291381	0.358116	0.402254	0.496297	0.596612	28	37	0.00147728	-0.00613914	0.0169567	-0.0208376	-0.0197645		-0.00566146		28	37	0	0.00158773	0.0054393	0	0.0121866	0.0282821	0.00210066	0.00603499	0.00666849	0		0.0132955	-0.0552522	0.15261	-0.187539	-0.177881		0.0904715	-4.03819	3.61499	-5.4123
36	51		1913.13	15	8.11-8.15	0.0501996	0.0681653	0.0750726	0.162276	0.466399		0.0599264	0.0651802	0.0804187	0.152818	0.489994	36	51	-0.00972677	0.00298507	-0.00534607	0.00945851	-0.0235951		-0.00524488		36	51	0.00601652	0.0101278	0.00587483	0.0102251	0.00559751	0.00965114	0.00775075	0.00634318	0.0151394	0.0272084		-0.145901	0.0447761	-0.080191	0.141878	-0.353927		-1.48135	0.40541	-1.071	0.896748
38	49		1411.83	11	5.28-5.37	0.0540463	0.0643039	0.0977619	0.15036	0.18771		0.064236	0.0754354	0.0975646	0.148894	0.194837	38	49	-0.0101897	-0.0111315	0.000197286	0.00146567	-0.00712646		-0.00535693		38	49	0.0148039	0.0159847	0.0164476	0.0136761	0.0160939	0.0121284	0.0165815	0.0196946	0.0102967	0.0135212		-0.112087	-0.122446	0.00217015	0.0161224	-0.078391		-0.922212	-0.837121	0.0133172	0.148293
38	51		1609.96	13	6.41-6.55	0.0344581	0.0619876	0.0774734	0.11962	0.160044		0.0463201	0.0594689	0.0862863	0.121691	0.158812	38	51	-0.011862	0.00251871	-0.00881297	-0.00207095	0.00123146		-0.00379915		38	51	0.010429	0.00711125	0.0138927	0.0103859	0.0130823	0.00767279	0.00675155	0.00917141	0.00707336	0.0134209		-0.154206	0.0327433	-0.114569	-0.0269224	0.016009		-1.58684	0.444895	-0.916956	-0.285457
39	49		1264.76	10	5.29-5.37	0.0559131	0.0367616	0.0514288	0.0886685	0.144541		0.0393503	0.0596821	0.086154	0.111423	0.156171	39	49	0.0165628	-0.0229204	-0.0347252	-0.0227546	-0.0116306		-0.0150936		39	49	0.00567269	0.0120384	0.0106982	0.0047294	0.0182043	0.00536463	0.00267746	0.00443746	0.00924075	0.0102706		0.165628	-0.229204	-0.347252	-0.227546	-0.116306		3.67433	-3.21908	-5.19304	-3.79668
40	51		1334.8	11	8.47-8.55	0.136209	0.241074	0.320258	0.413931	0.488298		0.134434	0.225432	0.328922	0.423337	0.467171	40	51	0.00177558	0.0156419	-0.00866364	-0.00940651	0.0211269		0.00409484		40	51	0.0114619	0.0145692	0.00241764	0.00643758	0.0202571	0.00863514	0.00713853	0.00617476	0.0137236	0.00947693		0.0195313	0.172061	-0.0953	-0.103472	0.232396		0.214304	1.6699	-2.26292	-1.07481
47	64		1938.13	15	9.95-10.03	0.0725024	0.11579	0.14941	0.215899	0.284967		0.07297	0.122689	0.157138	0.206472	0.292295	47	64	-0.000467562	-0.0068994	-0.00772816	0.00942706	-0.00732796		-0.0025992		47	64	0.00344458	0.00936488	0.00816905	0.00813851	0.0115242	0.00653473	0.00618458	0.0171411	0.0148861	0.011153		-0.00701343	-0.103491	-0.115922	0.141406	-0.109919		-0.109631	-1.06481	-0.704942	0.962429
55	62		904.477	6	11.02-11.06	0.23615	0.349122	0.384127	0.472984	0.515956		0.235259	0.324295	0.404584	0.454129	0.507509	55	62	0.000891045	0.0248269	-0.0204565	0.0188552	0.00844701		0.00651274		55	62	0.0153572	0.0113644	0.0234505	0.0236169	0.00922015	0.00478731	0.0121833	0.0193047	0.010999	0.000902736		0.00534627	0.148961	-0.122739	0.113131	0.0506821		0.0959422	2.58098	-1.1665	1.25355
72	94		2617.38	21	7.50-7.62	0.353944	0.36916	0.379651	0.398288	0.408374		0.367387	0.390292	0.388556	0.408479	0.409393	72	94	-0.0134426	-0.0211315	-0.00890583	-0.0101911	-0.00101905		-0.010938		72	94	0.00848479	0.0111282	0.0158632	0.00738657	0.00678365	0.00678365	0.0115654	0.0336083	0.00766887	0.00739083		-0.282294	-0.443761	-0.187022	-0.214013	-0.0214		-2.14331	-2.28046	-0.415062	-1.65778
75	82		929.553	7	5.55-5.57	0.234724	0.354959	0.444159	0.475928	0.540873		0.226149	0.360222	0.430816	0.46572	0.551335	75	82	0.00857505	-0.00526354	0.0133431	0.0102079	-0.0104614		0.00328021		75	82	0.0191209	0.021787	0.0206772	0.0183663	0.0194194	0.0255819	0.0171414	0.0221514	0.0170834	0.0294913		0.0600254	-0.0368448	0.0934015	0.0714552	-0.0732299		0.465038	-0.328864	0.762677	0.70488
75	86		1356.74	10	8.78-8.87	0.0565284	0.0706809	0.0754734	0.170126	0.276221		0.0623796	0.0560167	0.0863187	0.156639	0.286194	75	86	-0.00585119	0.0146642	-0.0108452	0.0134876	-0.00997239		0.000296597		75	86	0.00155522	0.0108078	0.00535925	0.00956821	0.00484851	0.0116266	0.00666119	0.00155522	0.00763806	0.0298784		-0.0585119	0.146642	-0.108452	0.134876	-0.0997239		-0.863978	2.00062	-3.36618	1.90813
78	84		749.325	6	5.15-5.16	0.0539771	0.0734007	0.0513878	0.0738326	0.0778632		0.048452	0.104086	0.0872	0.129146	0.107631	78	84	0.00552512	-0.0306856	-0.0358122	-0.0553137	-0.0297674		-0.0292107		78	84	0.0133766	0.0177836	0.0234896	0.0190495	0.020507	0.0129391	0.011594	0.0442871	0.0141025	0.014108		0.0331507	-0.184113	-0.214873	-0.331882	-0.178604		0.514213	-2.50358	-1.23733	-4.04219
86	95		1092.57	8	10.95-11.00	0.0639162	0.112754	0.10379	0.147762	0.256534		0.0638976	0.113082	0.131724	0.148822	0.234894	86	95	1.86567e-05	-0.000327799	-0.0279338	-0.00105914	0.0216399		-0.00153243		86	95	0.0113868	0.00792444	0.0171019	0.00908507	0.00517761	0.00194216	0.00398004	0.0125209	0.00565429	0.00288116		0.000149254	-0.00262239	-0.22347	-0.00847313	0.173119		0.00279749	-0.0640255	-2.28269	-0.171433
87	97		1252.65	10	8.04-8.08	0.235222	0.367069	0.439628	0.621274	0.687693		0.223092	0.35989	0.396856	0.63427	0.68748	87	97	0.0121301	0.0071794	0.0427718	-0.0129961	0.000212537		0.00985955		87	97	0.0118696	0.00421851	0.0234493	0.00581582	0.00524701	0.00916313	0.0017391	0.0271004	0.0098391	0.0149328		0.121301	0.071794	0.427718	-0.129961	0.00212537		1.40114	2.72525	2.06721	-1.96947
93	101		948.518	8	6.81-6.86	0.22253	0.252607	0.310122	0.433767	0.516388		0.210335	0.263741	0.333762	0.43897	0.529845	93	101	0.0121942	-0.0111341	-0.0236407	-0.00520299	-0.0134575		-0.00824821		93	101	0.0104853	0.0126666	0.00361604	0.0178224	0.020294	0.0122392	0.0222226	0.00813918	0.0234985	0.00544179		0.0975537	-0.0890731	-0.189125	-0.0416239	-0.10766		1.31053	-0.753935	-4.59752	-0.305562
94	100		707.339	6	6.58-6.61	0.399003	0.477553	0.477752	0.47779	0.478914		0.365057	0.453275	0.466579	0.4636	0.477128	94	100	0.0339463	0.0242779	0.0111734	0.0141903	0.00178557		0.0170747		94	100	0.00739229	0.0202627	0.00582363	0.00604701	0.00890796	0.00946866	0.0224706	0.0150542	0.015302	0.00833781		0.203678	0.145667	0.0670403	0.0851418	0.0107134		4.8946	1.38976	1.19896	1.49381
102	108		983.506	6	6.58-6.62	0.114358	0.1482	0.176664	0.376665	0.430172		0.101125	0.135958	0.173443	0.326725	0.437283	102	108	0.0132333	0.0122423	0.0032204	0.0499405	-0.00711119		0.0143051		102	108	0.0209803	0.0172152	0.0222988	0.0487388	0.0269595	0.017999	0.0190368	0.0120672	0.013244	0.0305204		0.0794	0.0734537	0.0193224	0.299643	-0.0426672		0.82917	0.82615	0.219996	1.71265
111	120		1267.68	8	9.95-10.05	0.124062	0.164796	0.19802	0.296175	0.362651		0.105648	0.173371	0.19612	0.273085	0.342814	111	120	0.0184144	-0.00857444	0.00189963	0.0230903	0.0198371		0.0109334		111	120	0.0143776	0.0159515	0.0100062	0.0188353	0.029219	0.0253535	0.0144625	0.0130188	0.036803	0.022341		0.147315	-0.0685955	0.015197	0.184722	0.158697		1.09429	-0.689744	0.200382	0.967365
116	130		1905.05	13	7.78-7.83	0.284385	0.343641	0.344569	0.376502	0.3953		0.292341	0.343582	0.360562	0.379672	0.400811	116	130	-0.00795672	5.90126e-05	-0.0159923	-0.00316912	-0.00551022		-0.00651387		116	130	0.0151507	0.0158217	0.015959	0.0203519	0.00968622	0.0126817	0.0215185	0.00994168	0.0150294	0.0165342		-0.103437	0.000767164	-0.2079	-0.0411985	-0.0716328		-0.697518	0.00382691	-1.4732	-0.216961
133	143		1126.59	10	5.64-5.67	0.0985227	0.0957601	0.122206	0.184633	0.268461		0.0899463	0.11327	0.113854	0.161747	0.260695	133	143	0.00857642	-0.0175094	0.00835254	0.0228858	0.00776597		0.00601427		133	143	0.0108254	0.0097297	0.00854821	0.0172758	0.0209201	0.00800224	0.0208016	0.00874358	0.00673284	0.0125531		0.0857642	-0.175094	0.0835254	0.228858	0.0776597		1.10346	-1.3206	1.18311	2.13788
136	149		1518.78	13	6.15-6.18	0.308994	0.33933	0.380199	0.421329	0.563165		0.314385	0.317914	0.369891	0.430055	0.557877	136	149	-0.00539127	0.021416	0.0103078	-0.00872618	0.00528726		0.00457871		136	149	0.0166191	0.0332871	0.00170987	0.01363	0.00401527	0.0104565	0.0188104	0.0148674	0.020553	0.00590873		-0.0700866	0.278407	0.134001	-0.11344	0.0687343		-0.475579	0.970162	1.193	-0.612858
141	152		1326.71	11	4.39-4.43	0.229876	0.244115	0.255894	0.276315	0.252953		0.237883	0.252623	0.26211	0.286931	0.272099	141	152	-0.00800706	-0.00850787	-0.00621615	-0.010616	-0.0191459		-0.0104986		141	152	0.00740597	0.00702361	0.0153457	0.0103636	0.00884953	0.00305794	0.0154308	0.00627517	0.0110862	0.0137997		-0.0880776	-0.0935866	-0.0683776	-0.116776	-0.210604		-1.73088	-0.869175	-0.64941	-1.21162
155	163		1135.56	8	13.78-13.80	-0.00126828	-0.0029944	0.0133506	0.0422963	0.108386		-0.0298614	-0.00607313	0.00774813	0.0479243	0.0887412	155	163	0.0285931	0.00307873	0.00560243	-0.00562799	0.0196451		0.0102583		155	163	0.0210761	0.0180726	0.0202715	0.0189522	0.0200933	0.0282216	0.0163028	0.0221401	0.025081	0.0205442		0.228745	0.0246299	0.0448194	-0.0450239	0.157161		1.40603	0.219091	0.323256	-0.310086
157	163		905.452	6	13.58-13.60	0.000687065	0.00999353	0.0121714	0.0252995	0.0447856		0.00953085	0.0210082	0.0101861	0.0285848	0.0348674	157	163	-0.00884378	-0.0110147	0.00198532	-0.00328532	0.00991816		-0.00224806		157	163	0.0138012	0.0115585	0.00802562	0.0178055	0.0201995	0.0114393	0.0211632	0.00861517	0.0113709	0.0102495		-0.0530627	-0.0660881	0.0119119	-0.0197119	0.059509		-0.854519	-0.791162	0.292052	-0.269345
160	172		1537.8	11	5.71-5.75	0.488707	0.474039	0.469734	0.485188	0.470846		0.494469	0.472925	0.488825	0.506272	0.485891	160	172	-0.00576269	0.00111316	-0.0190913	-0.0210837	-0.015045		-0.0119739		160	172	0.0199813	0.0312821	0.0314251	0.0246573	0.0178113	0.0107923	0.0348814	0.0176113	0.0165308	0.0174528		-0.0633896	0.0122448	-0.210004	-0.231921	-0.165496		-0.439518	0.0411504	-0.917932	-1.23015
163	170		913.467	7	8.18-8.31	0.267965	0.267881	0.269231	0.313901	0.349665		0.260183	0.293379	0.281218	0.310514	0.31052	163	170	0.00778124	-0.0254983	-0.0119872	0.00338678	0.039145		0.0025655		163	170	0.0265222	0.018829	0.00549957	0.00420959	0.0118932	0.0300151	0.0143606	0.0150055	0.0222147	0.0130292		0.0544687	-0.178488	-0.0839104	0.0237075	0.274015		0.336482	-1.86502	-1.29915	0.259446
165	171		815.393	6	12.06-12.14	0.0408326	0.0406458	0.048103	0.106499	0.171332		0.0402132	0.0418383	0.047896	0.100112	0.177072	165	171	0.000619403	-0.00119254	0.000206965	0.00638657	-0.00574005		5.60697e-05		165	171	0.00245821	0.00259328	0.0065107	0.00373607	0.00451294	0.000956716	0.00528831	0.00356816	0.0130007	0.00261841		0.00371642	-0.00715522	0.00124179	0.0383194	-0.0344403		0.406714	-0.350689	0.0482836	0.817766
167	183		1958.92	13	11.63-11.69	0.0799922	0.159295	0.226337	0.347755	0.464132		0.0782061	0.172887	0.250793	0.355868	0.471697	167	183	0.00178611	-0.013592	-0.0244553	-0.00811297	-0.00756429		-0.0103877		167	183	0.0048178	0.000767164	0.00149472	0.00484684	0.000626406	0.00618955	0.0148778	0.00273823	0.00743192	0.000471757		0.0232194	-0.176696	-0.317919	-0.105469	-0.0983358		0.394416	-1.58025	-13.5779	-1.58374
168	174		813.414	5	9.29-9.36	0.202334	0.247176	0.301613	0.347632	0.331317		0.225135	0.282687	0.336648	0.336608	0.338159	168	174	-0.0228015	-0.0355116	-0.0350346	0.0110239	-0.00684179		-0.0178331		168	174	0.0239696	0.035366	0.0193325	0.0374552	0.024837	0.0207663	0.0217878	0.0236737	0.025871	0.0191072		-0.114007	-0.177558	-0.175173	0.0551194	-0.034209		-1.2453	-1.48074	-1.98536	0.419449
168	175		926.498	6	9.93-9.99	0.090352	0.18701	0.242675	0.300176	0.389913		0.0940575	0.197986	0.243418	0.293696	0.401803	168	175	-0.00370547	-0.0109759	-0.000743532	0.0064801	-0.01189		-0.00416697		168	175	0.0121709	0.0158704	0.0179383	0.023109	0.0145137	0.0210463	0.0161689	0.0185988	0.0462308	0.0187109		-0.0222328	-0.0658552	-0.00446119	0.0388806	-0.0713403		-0.263987	-0.839098	-0.0498392	0.21716
171	183		1506.71	9	10.12-10.18	0.146488	0.245472	0.32112	0.431121	0.56049		0.15064	0.26464	0.333222	0.442409	0.557422	171	183	-0.00415257	-0.0191678	-0.0121023	-0.0112877	0.0030675		-0.00872859		171	183	0.0165856	0.00291393	0	0.00304942	0.00893731	0.00845788	0	0.00314461	0	0.00364362		-0.0373731	-0.17251	-0.108921	-0.10159	0.0276075		-0.386325	-11.3934	-6.66596	-6.41136
182	191		1311.56	9	9.12-9.17	0.212143	0.276744	0.329692	0.369713	0.386415		0.213924	0.282407	0.34794	0.387247	0.408323	182	191	-0.00178126	-0.00566235	-0.0182481	-0.0175343	-0.0219073		-0.0130267		182	191	0.0196836	0.0127765	0.0244287	0.0285342	0.0198755	0.00982189	0.0216267	0.0179	0.0199962	0.0199874		-0.0160313	-0.0509612	-0.164233	-0.157809	-0.197166		-0.14025	-0.390445	-1.04365	-0.87163
187	196		1304.62	9	6.30-6.34	0.0849018	0.125716	0.172153	0.270023	0.38043		0.0934005	0.127481	0.1787	0.259564	0.373488	187	196	-0.00849867	-0.00176484	-0.00654693	0.010459	0.00694212		0.000118143		187	196	0.0306073	0.0297012	0.0272942	0.0282599	0.0270617	0.0263546	0.0274542	0.0276791	0.0265551	0.0256371		-0.0764881	-0.0158836	-0.0589224	0.0941313	0.0624791		-0.364448	-0.0755769	-0.29171	0.467152
187	199		1585.79	11	9.60-9.72	0.148413	0.18837	0.206227	0.254303	0.253144		0.142176	0.195715	0.224407	0.236483	0.268462	187	199	0.00623745	-0.0073445	-0.0181799	0.0178193	-0.0153186		-0.00335726		187	199	0.00803338	0.0145858	0.0128088	0.00276024	0.00734261	0.0146575	0.00583799	0.00863379	0.014889	0.0123611		0.0686119	-0.0807896	-0.199979	0.196012	-0.168504		0.646355	-0.809706	-2.0385	2.0382
197	208		1338.65	10	11.66-11.72	0.286719	0.320659	0.33867	0.353287	0.383985		0.286766	0.326345	0.343459	0.368349	0.384332	197	208	-4.79104e-05	-0.00568627	-0.00478836	-0.0150619	-0.000347164		-0.00518633		197	208	0.00304134	3.39364e-14	0.00681	0.0105796	0.00325672	0.00213522	0.0088509	0.00749761	0.0138482	0.00676313		-0.000479104	-0.0568627	-0.0478836	-0.150619	-0.00347164		-0.0223311	-1.11276	-0.818831	-1.49699
209	221		1509.69	10	11.07-11.16	0.0600194	0.0975875	0.138926	0.21033	0.346536		0.0634461	0.11423	0.166915	0.231506	0.339289	209	221	-0.00342672	-0.016643	-0.0279896	-0.0211754	0.00724746		-0.0123974		209	221	0.00624358	0.00640716	0.0104994	0.0103534	0.00668104	0.00969403	0.02189	0.00704925	0.00483821	0.0129775		-0.0342672	-0.16643	-0.279896	-0.211754	0.0724746		-0.514735	-1.26385	-3.83347	-3.20935
216	235		2268.17	17	12.68-12.73	0.178989	0.212525	0.212574	0.251865	0.341209		0.185299	0.210701	0.225596	0.255046	0.319305	216	235	-0.00630904	0.00182467	-0.0130227	-0.0031806	0.0219038		0.000243231		216	235	0.0121582	0.0168015	0.0168542	0.0155464	0.0606355	0.013652	0.0128991	0.0165004	0.0124069	0.0151545		-0.107254	0.0310194	-0.221385	-0.0540701	0.372364		-0.597753	0.149203	-0.956301	-0.276967
236	242		880.471	6	9.63-9.73	0.0490415	0.117924	0.130486	0.169223	0.225705		0.0584652	0.169495	0.12131	0.142049	0.242958	236	242	-0.00942363	-0.0515716	0.00917612	0.0271734	-0.0172527		-0.0083797		236	242	0.038305	0.0040393	0.0286047	0.0135893	0	0.010806	2.82803e-14	0.0162908	0	2.82803e-14		-0.0565418	-0.30943	0.0550567	0.16304	-0.103516		-0.410106	-22.1139	0.482815	3.46344
237	246		1070.48	9	11.69-11.75	0.464707	0.480005	0.475752	0.497273	0.488947		0.463222	0.475874	0.479152	0.496212	0.487648	237	246	0.00148425	0.00413101	-0.00339934	0.00106103	0.0012995		0.00091529		237	246	0.0183763	0.0189552	0.00704444	0.0147109	0.00839353	0.0138015	0.0156272	0.0114725	0.0128755	0.0114167		0.0133582	0.0371791	-0.030594	0.00954925	0.0116955		0.111861	0.291256	-0.437346	0.0940044
238	250		1326.61	12	6.31-6.34	0.0566412	0.0793399	0.125557	0.1758	0.289856		0.0589766	0.0892789	0.123718	0.195612	0.300906	238	250	-0.00233545	-0.00993893	0.00183843	-0.0198119	-0.0110499		-0.00825955		238	250	0.00797649	0.00459938	0.0128134	0.0109255	0.0156501	0.0109748	0.00387164	0.00155211	0.0185095	0.00324975		-0.0280254	-0.119267	0.0220612	-0.237743	-0.132599		-0.298153	-2.86341	0.246706	-1.59655
246	259		1537.8	12	5.70-5.74	0.51193	0.515297	0.50985	0.522916	0.514126		0.521169	0.507873	0.51598	0.536401	0.533905	246	259	-0.00923856	0.00742351	-0.0061296	-0.0134852	-0.0197797		-0.00824192		246	259	0.00631256	0.00513918	0.00749677	0.0176608	0.00413383	0.00349303	0.0165162	0.0143784	0.00816604	0.0120799		-0.110863	0.0890821	-0.0735552	-0.161822	-0.237357		-2.21797	0.743349	-0.654735	-1.20042
251	259		1022.56	7	13.47-13.49	0.011555	0.0362147	0.068939	0.179026	0.315035		0.0138316	0.0247644	0.0696098	0.183407	0.308448	251	259	-0.00227655	0.0114503	-0.000670789	-0.00438081	0.00658763		0.00214196		251	259	0.011707	0.0154687	0.00921919	0.00691748	0.0164286	0.00815928	0.010423	0.00396866	0.0068774	0.00817612		-0.0159358	0.0801522	-0.00469552	-0.0306657	0.0461134		-0.276323	1.06326	-0.115754	-0.777876
251	260		1137.58	8	13.58-13.59	0.028969	0.0393125	0.0728345	0.17178	0.324869		0.0293231	0.0415638	0.0647017	0.164115	0.324485	251	260	-0.000354104	-0.00225131	0.00813284	0.00766511	0.000383955		0.0027153		251	260	0.00349534	0.00757183	0.00528358	0.0159373	0.0280614	0.00640149	0.00786194	0.00629216	0.015505	0.0331007		-0.00283284	-0.0180104	0.0650627	0.0613209	0.00307164		-0.0840912	-0.357241	1.71446	0.597088
252	259		909.472	6	12.96-12.99	0.0303672	0.0565328	0.0944498	0.218551	0.368631		0.0344269	0.054047	0.09059	0.211252	0.372389	252	259	-0.0040597	0.00248582	0.0038597	0.00729851	-0.00375771		0.00116532		252	259	0.00914975	0.00235199	0.00464851	0.00105697	0.00524726	0.00823085	0.00228632	0.00816965	0.00786194	0.00465995		-0.0243582	0.0149149	0.0231582	0.043791	-0.0225463		-0.571346	1.31263	0.711224	1.59358
265	278		1690.87	12	10.82-10.93	0.105665	0.16247	0.234014	0.326256	0.361313		0.104128	0.160624	0.256599	0.314344	0.375777	265	278	0.00153669	0.00184577	-0.0225854	0.0119121	-0.0144639		-0.00435097		265	278	0.0120959	0.00417201	0.0150782	0.00395672	0.0089949	0.00876928	0.0161878	0.00684092	0.0144429	0.00723022		0.0184403	0.0221493	-0.271025	0.142945	-0.173567		0.178152	0.191243	-2.36262	1.37777
279	288		1240.63	9	5.63-5.66	0.1148	0.134773	0.140844	0.208101	0.314459		0.107602	0.125614	0.133474	0.205801	0.325276	279	288	0.00719818	0.00915904	0.00736998	0.00230033	-0.0108171		0.00304209		279	288	0.0149143	0.0128891	0.0141381	0.011062	0.016238	0.0140756	0.010009	0.0155451	0.0131574	0.0127129		0.0647836	0.0824313	0.0663299	0.020703	-0.0973537		0.607953	0.972119	0.607496	0.231784
281	290		1210.64	9	8.12-8.18	0.0326564	0.0510295	0.0709254	0.160063	0.253072		0.0222141	0.047343	0.0706685	0.186884	0.247533	281	290	0.0104423	0.00368657	0.000256882	-0.0268209	0.00553914		-0.0013792		281	290	0.01646	0.0157007	0.0196315	0.0131595	0.0134158	0.013924	0.0171148	0.021059	0.0134139	0.017131		0.0939806	0.0331791	0.00231194	-0.241388	0.0498522		0.838915	0.274927	0.0154543	-2.47218
282	288		885.406	6	5.64-5.66	0.123703	0.123807	0.142702	0.225945	0.376472		0.113331	0.137559	0.148223	0.217229	0.393776	282	288	0.0103721	-0.0137517	-0.00552114	0.00871642	-0.0173045		-0.00349776		282	288	0.00675821	0.0126246	0.0133495	0.0150425	0.0187425	0.0186182	0.0178289	0.00698881	0.0189915	0.0141627		0.0622328	-0.0825104	-0.0331269	0.0522985	-0.103827		0.907015	-1.0903	-0.634639	0.623154
294	306		1607.81	11	5.30-5.33	0.0525315	0.0726894	0.105366	0.165804	0.291654		0.0663267	0.0771455	0.108458	0.171704	0.295201	294	306	-0.0137953	-0.00445604	-0.00309213	-0.00589973	-0.00354735		-0.0061581		294	306	0.00606431	0.00999091	0.00718453	0.00979009	0.00641872	0.00935902	0.00540312	0.00496893	0.00954261	0.0101265		-0.151748	-0.0490164	-0.0340134	-0.064897	-0.0390209		-2.14258	-0.679508	-0.613104	-0.747446
307	316		1224.65	9	7.12-7.18	0.0330872	0.0625728	0.126168	0.194581	0.368145		0.0473566	0.0685584	0.124298	0.194286	0.357564	307	316	-0.0142693	-0.00598557	0.00187032	0.000295688	0.0105808		-0.00150163		307	316	0.0371396	0.0371904	0.0370589	0.0376803	0.0368615	0.0371174	0.0370794	0.037461	0.0376035	0.0373818		-0.128424	-0.0538701	0.0168328	0.00266119	0.0952269		-0.470697	-0.19741	0.0614769	0.00962073
331	337		855.461	6	10.41-10.48	0.0958055	0.3526	0.44218	0.568108	0.554299		0.0872149	0.368047	0.46405	0.538543	0.550968	331	337	0.00859055	-0.0154478	-0.0218701	0.0295659	0.00333085		0.000833881		331	337	0.00393831	0.00904552	0.00671716	0.00920323	0.0171391	0.0118684	0.0131303	0.020152	0.00838706	0.00126766		0.0515433	-0.0926866	-0.131221	0.177396	0.0199851		1.18989	-1.67809	-1.78327	4.1127
332	349		2104.18	17	7.94-8.01	0.0804742	0.104999	0.127329	0.150544	0.19568		0.081263	0.111106	0.128867	0.144343	0.2091	332	349	-0.00078885	-0.00610729	-0.0015374	0.00620105	-0.0134205		-0.00313059		332	349	0.00778903	0.00788033	0.00777709	0.00664846	0.00664846	0.00947726	0.00874715	0.00946435	0.0156362	0.00873398		-0.0134104	-0.103824	-0.0261358	0.105418	-0.228148		-0.111379	-0.89848	-0.21738	0.632133
355	365		1262.59	9	7.13-7.18	0.0599746	0.107392	0.160812	0.227464	0.393253		0.0823483	0.120783	0.148792	0.217918	0.370758	355	365	-0.0223736	-0.0133914	0.0120201	0.00954594	0.0224945		0.0016591		355	365	0.0250184	0.00827214	0.00585937	0.00994312	0.0132915	0.00411675	0.00905987	0.00384395	0.00539486	0.0241816		-0.201363	-0.120522	0.108181	0.0859134	0.202451		-1.5284	-1.89062	2.97092	1.46159
367	374		859.379	6	9.51-9.58	0.0532254	0.0511811	0.0532025	0.0565316	0.155087		0.0578478	0.0642694	0.070047	0.0690256	0.108246	367	374	-0.00462239	-0.0130883	-0.0168445	-0.012494	0.0468413		-4.1592e-05		367	374	0.030154	0.0286231	0.0263396	0.020497	0.0514483	0.040801	0.0297597	0.0221866	0.0172714	0.0179622		-0.0277343	-0.0785299	-0.101067	-0.0749642	0.281048		-0.157806	-0.549024	-0.847177	-0.807368
369	379		1210.7	9	9.60-9.70	0.0948536	0.127777	0.178354	0.279811	0.455563		0.079063	0.136477	0.157003	0.241036	0.423583	369	379	0.0157905	-0.0087005	0.0213506	0.0387755	0.0319799		0.0198392		369	379	0.0107582	0.00449187	0.00590862	0.00778425	0.0137567	0.0164471	0.0108594	0.0273395	0.00979635	0.0184227		0.142115	-0.0783045	0.192155	0.348979	0.287819		1.39164	-1.28234	1.32211	5.36751
379	400		2385.24	21	12.48-12.51	0.101623	0.156624	0.228355	0.316022	0.379721		0.10955	0.154987	0.227625	0.319092	0.379895	379	400	-0.00792679	0.0016376	0.000730135	-0.00307008	-0.000174698		-0.00176077		379	400	0.0119396	0.00619005	0.00665686	0.00319986	0.00785707	0.0118743	0.0143033	0.00228898	0.00667036	0.00351549		-0.166463	0.0343896	0.0153328	-0.0644716	-0.00366866		-0.815343	0.181992	0.17965	-0.718764
383	400		1986.99	17	7.37-7.40	0.61432	0.6209	0.625612	0.63234	0.629036		0.605782	0.628483	0.634477	0.639551	0.638947	383	400	0.00853784	-0.00758297	-0.00886444	-0.00721141	-0.00991159		-0.00500651		383	400	0.00614091	0.00363064	0.00759587	0.00386172	0.00699034	0.00845601	0.00391247	0.0078899	0.00960404	0.00750948		0.145143	-0.12891	-0.150696	-0.122594	-0.168497		1.41504	-2.46072	-1.4019	-1.20666
386	395		1198.61	9	8.11-8.17	0.0811279	0.136446	0.192637	0.310261	0.403202		0.099963	0.119068	0.196798	0.313618	0.412295	386	395	-0.0188352	0.0173784	-0.00416086	-0.00335771	-0.00909237		-0.00361353		386	395	0.0101751	0.0127755	0.00834212	0.00916468	0.00262056	0	0.00759635	0.00419337	0.00586799	0.00544527		-0.169516	0.156406	-0.0374478	-0.0302194	-0.0818313		-3.2062	2.02515	-0.771875	-0.53442
397	412		1745.03	14	5.76-5.91	0.052827	0.0878248	0.123623	0.185593	0.28705		0.0487111	0.0921354	0.137166	0.187749	0.308662	397	412	0.00411588	-0.00431055	-0.0135426	-0.00215672	-0.0216116		-0.00750113		397	412	0.0077049	0.0081516	0.00921983	0.018067	0.0164062	0.0127786	0.00971706	0.00687186	0.0105814	0.00967356		0.0576224	-0.0603478	-0.189597	-0.030194	-0.302563		0.477755	-0.588649	-2.03987	-0.178413
401	409		1045.69	7	10.17-10.26	0.0306616	0.0305904	0.0406021	0.0451484	0.112955		0.031051	0.0388237	0.0379514	0.0477655	0.130984	401	409	-0.000389339	-0.00823326	0.00265075	-0.00261706	-0.0180286		-0.0053235		401	409	0.00554435	0.0154448	0.0138817	0.0122763	0.0149083	0.00637846	0.00530938	0.0105893	0.00591642	0.00358443		-0.00272537	-0.0576328	0.0185552	-0.0183194	-0.1262		-0.079793	-0.873165	0.262964	-0.332624
401	411		1231.79	9	10.50-10.60	0.138067	0.22901	0.238805	0.26495	0.308055		0.127849	0.23229	0.250963	0.248916	0.294477	401	411	0.0102176	-0.00328043	-0.012158	0.016034	0.0135774		0.00487811		401	411	0.0107698	0.0098602	0.0122413	0.0126758	0.0169071	0.00988988	0.0102796	0.00897745	0.00928624	0.0170367		0.0919582	-0.0295239	-0.109422	0.144306	0.122197		1.21034	-0.398894	-1.38721	1.76739
402	411		1118.7	8	9.55-9.65	0.12299	0.223824	0.229787	0.245555	0.295356		0.110106	0.22128	0.240955	0.23694	0.282166	402	411	0.0128836	0.0025444	-0.0111687	0.00861511	0.0131899		0.00521287		402	411	0.00788955	0.0282797	0.0264774	0.0301819	0.0368261	0.0137388	0.0288194	0.0341554	0.0304056	0.022664		0.103069	0.0203552	-0.0893493	0.0689209	0.105519		1.40851	0.109147	-0.447625	0.348298
411	421		1331.76	9	10.70-10.83	0.00498159	0.0108416	0.0186826	0.0818282	0.322258		0.00323284	0.0085209	0.0184526	0.0963415	0.32486	411	421	0.00174876	0.00232073	0.000230017	-0.0145133	-0.00260216		-0.00256318		411	421	0.00555937	0	0.0096995	0.00524925	0.00477114	0.000265837	0.00484909	0.0103013	0.0216076	0.00497098		0.0157388	0.0208866	0.00207015	-0.130619	-0.0234194		0.544212	0.828944	0.0281573	-1.13049
436	446		1214.75	10	9.13-9.20	0.0304646	0.0346619	0.0377087	0.0361033	0.0340336		0.0238242	0.0357001	0.0422549	0.0287004	0.0561322	436	446	0.00664045	-0.00103821	-0.00454627	0.00740284	-0.0220987		-0.00272797		436	446	0.0221655	0.0276234	0.0278325	0.0286491	0.0227791	0.0332466	0.0252375	0.0338716	0.0325973	0.0352576		0.0664045	-0.0103821	-0.0454627	0.0740284	-0.220987		0.287842	-0.04806	-0.179616	0.295456
438	445		943.63	7	8.21-8.29	0.0095597	0.0103435	0.0182876	0.0203275	0.0334885		0.013509	0.0175565	0.00945885	0.0155388	0.00495203	438	445	-0.00394925	-0.00721301	0.00882878	0.0047887	0.0285365		0.00619834		438	445	0.01112	0.00741599	0.0173896	0.0135814	0.0302356	0.00840256	0.009029	0.0146407	0.0130618	0.0117358		-0.0276448	-0.050491	0.0618015	0.0335209	0.199755		-0.490779	-1.06925	0.672702	0.440172
438	446		1014.67	8	7.87-7.93	0.010842	0.0323616	0.0279892	0.0370063	0.0898972		0.02608	0.025758	0.0237293	0.0289866	0.0895759	438	446	-0.0152381	0.00660354	0.00425989	0.00801978	0.000321269		0.000793284		438	446	0.0150463	0.0129718	0.00654701	0.011253	0.00655299	0.00994254	0.0104961	0.0141701	0.00718526	0.0108433		-0.121904	0.0528284	0.0340791	0.0641582	0.00257015		-1.46348	0.685449	0.472683	1.0404
441	447		757.518	6	9.79-9.86	0.0579985	0.0658624	0.0921532	0.210306	0.276692		0.0567162	0.0799833	0.102498	0.205349	0.290074	441	447	0.00128234	-0.0141209	-0.0103445	0.00495697	-0.0133818		-0.00632159		441	447	0.017658	0.0174913	0.0231144	0.0213689	0.0286649	0.0169657	0.0160231	0.0185077	0.0163236	0.0180192		0.00769403	-0.0847254	-0.0620672	0.0297418	-0.080291		0.0907024	-1.03107	-0.605087	0.319286
448	464		2075.12	14	11.64-11.71	0.137688	0.184713	0.286178	0.407321	0.503041		0.134474	0.197038	0.284469	0.387436	0.499469	448	464	0.0032145	-0.0123249	0.00170917	0.0198859	0.00357249		0.00321143		448	464	0.00738902	0.0043806	0.0161083	0.0131853	0.0159027	0.00606919	0.00948369	0.00670171	0.0152984	0.0363308		0.045003	-0.172549	0.0239284	0.278403	0.0500149		0.582268	-2.0435	0.16968	1.70543
448	476		3264.69	25	12.22-12.28	0.105429	0.160381	0.231218	0.354351	0.507104		0.115098	0.167573	0.225502	0.362185	0.510241	448	476	-0.0096689	-0.00719284	0.00571618	-0.00783367	-0.0031366		-0.00442316		448	476	0.00988979	0.00681696	0.00588985	0.00626812	0.00635373	0.0141296	0.0160806	0.0058126	0.00772269	0.0212424		-0.241722	-0.179821	0.142904	-0.195842	-0.0784149		-0.971022	-0.713297	1.19645	-1.36416
458	470		1498.83	10	12.99-13.02	0.0511319	0.0428172	0.0721396	0.101523	0.274839		0.0575634	0.0724561	0.0643857	0.103227	0.247341	458	470	-0.00643149	-0.029639	0.00775388	-0.00170358	0.0274978		-0.000504478		458	470	0.0142716	0.020861	0.0192076	0.00699522	0.0113488	0.0122867	0.0118072	0.0196033	0.0347637	0.0605973		-0.0643149	-0.29639	0.0775388	-0.0170358	0.274978		-0.59153	-2.14163	0.489349	-0.0832105
465	476		1208.59	10	7.64-7.66	0.157938	0.196436	0.201873	0.314331	0.479419		0.141694	0.184929	0.210997	0.309046	0.48042	465	476	0.0162443	0.0115069	-0.00912433	0.00528433	-0.0010006		0.00458212		465	476	0.00142149	0.00343627	0.0197651	0.00681104	0.00521687	0.00315672	0.00114896	0.00304269	0.0112282	0.0110207		0.162443	0.115069	-0.0912433	0.0528433	-0.010006		8.12708	5.5007	-0.790273	0.696951
468	487		2155.11	19	11.93-11.98	0.170508	0.188792	0.203608	0.237265	0.28956		0.164896	0.187345	0.197799	0.228431	0.290588	468	487	0.0056117	0.00144643	0.00580817	0.00883433	-0.00102726		0.00413467		468	487	0.00489866	0.0010945	0.00386017	0.00243559	0.00133928	0.00218633	0.00856606	0.00334438	0.00284603	0.00119458		0.106622	0.0274821	0.110355	0.167852	-0.0195179		1.81189	0.290108	1.96969	4.08484
470	487		1947.02	17	11.12-11.28	0.0878572	0.122707	0.135314	0.200419	0.26758		0.0841625	0.116611	0.135203	0.148168	0.211649	470	487	0.00369464	0.00609605	0.000110536	0.0522509	0.055931		0.0236166		470	487	0.00529807	0.0142025	0.00858797	0.00689342	0.0117583	0.00379833	0.00874873	0.00890263	0.0139749	0.00588428		0.062809	0.103633	0.0018791	0.888266	0.950827		0.981646	0.632979	0.0154776	5.80785
490	496		807.436	6	9.85-9.92	0.0354632	0.0329739	0.0406473	0.0373289	0.0676774		0.0280149	0.032909	0.0388331	0.0366609	0.067608	490	496	0.00744826	6.49254e-05	0.00181418	0.00066791	6.9403e-05		0.00201294		490	496	0.0141637	0.0121545	0.0148721	0.0139274	0.0119871	0.0139244	0.0115077	0.0134331	0.011707	0.0190498		0.0446896	0.000389552	0.0108851	0.00400746	0.000416418		0.649521	0.00671851	0.156794	0.0635841
508	514		831.312	5	4.72-4.72	0.409283	0.373516	0.409611	0.399153	0.392358		0.352812	0.372846	0.394825	0.379673	0.427963	508	514	0.0564707	0.000670149	0.0147857	0.0194806	-0.0356048		0.0111605		508	514	0.0260773	0.0324501	0.0340615	0.0158994	0.0228433	0.027534	0.00351642	0.0251134	0.0180564	0.0209821		0.282354	0.00335075	0.0739284	0.097403	-0.178024		2.57918	0.0355615	0.605159	1.40246
508	515		960.354	6	5.02-5.02	0.368789	0.378324	0.396092	0.376645	0.393566		0.349026	0.376225	0.388148	0.367987	0.370631	508	515	0.0197629	0.00209851	0.00794403	0.00865796	0.0229358		0.0122799		508	515	0.00686418	0.0147211	0.00637612	0.0113002	0.0178109	0.0170386	0.0102886	0.0148843	0.0332662	0.00134652		0.118578	0.012591	0.0476642	0.0519478	0.137615		1.86346	0.202377	0.849741	0.426835
516	530		1716.77	13	9.07-9.12	0.278235	0.337522	0.361203	0.410555	0.454132		0.281727	0.337821	0.360744	0.400978	0.466092	516	530	-0.00349196	-0.000299082	0.000458668	0.0095775	-0.0119594		-0.00114285		516	530	0.00642342	0.0049698	0.00411596	0.00391619	0.00349472	0.00972618	0.00825086	0.00679701	0.0061217	0.0116313		-0.0453955	-0.00388806	0.00596269	0.124507	-0.155472		-0.518903	-0.0537815	0.0999782	2.28269
517	530		1603.69	12	10.62-10.66	0.196555	0.232916	0.26687	0.362313	0.456085		0.195369	0.237717	0.28243	0.369798	0.47259	517	530	0.00118607	-0.00480137	-0.0155608	-0.0074847	-0.0165051		-0.00863318		517	530	0.00664316	0.00851244	0.0111634	0.0107464	0.00970883	0.00376418	0.00796057	0.00252438	0.00813445	0.0115626		0.0142328	-0.0576164	-0.18673	-0.0898164	-0.198061		0.269051	-0.713549	-2.35487	-0.961861
519	526		901.416	6	5.85-5.87	0.436132	0.473781	0.476281	0.469495	0.462192		0.427223	0.469593	0.474676	0.480922	0.466798	519	526	0.00890846	0.00418881	0.00160572	-0.0114274	-0.00460622		-0.000266119		519	526	0.0168774	0.0333813	0.0211386	0.0152692	0.0242532	0.0221545	0.0158614	0.0249204	0.0264311	0.0280017		0.0534507	0.0251328	0.00963433	-0.0685642	-0.0276373		0.55402	0.19631	0.0851084	-0.648421
523	533		1237.57	10	10.12-10.22	0.0624731	0.0786724	0.107057	0.115958	0.162571		0.0897339	0.0869176	0.098946	0.117801	0.164853	523	533	-0.0272607	-0.00824522	0.0081109	-0.00184254	-0.00228239		-0.006304		523	533	0.0114866	0.00350881	0.000709254	0.0163443	0.00286224	0	0.0152543	0.00600657	0.00527164	0.0103094		-0.272607	-0.0824522	0.081109	-0.0184254	-0.0228239		-4.11063	-0.912377	2.32272	-0.185832
527	534		926.458	7	11.02-11.06	0.276997	0.368601	0.433501	0.485469	0.639089		0.262824	0.383377	0.433389	0.517072	0.608377	527	534	0.0141733	-0.0147765	0.000112154	-0.0316032	0.0307128		-0.00027629		527	534	0.00789339	0.00636375	0.00659872	0.0109836	0.0447045	0.0116467	0.0174478	0.0140829	0.026374	0.0450429		0.0992134	-0.103436	0.000785075	-0.221222	0.21499		1.74483	-1.37808	0.0124905	-1.91596
536	543		932.523	7	6.15-6.17	0.0166759	0.0706503	0.158404	0.282882	0.448561		0.0240032	0.0682288	0.142409	0.271688	0.44696	536	543	-0.00732729	0.00242154	0.0159951	0.0111936	0.00160149		0.00477689		536	543	0.00655373	0.0138859	0.00331684	0.0376733	0.0299516	0.00983262	0.00497783	0.0134614	0.0978367	0.00798166		-0.051291	0.0169507	0.111966	0.0783552	0.0112104		-1.07402	0.284331	1.99829	0.184929
545	557		1487.78	11	7.76-7.80	0.0633844	0.154189	0.228159	0.399023	0.537249		0.0672182	0.18439	0.247645	0.42754	0.569506	545	557	-0.00383379	-0.0302008	-0.0194862	-0.0285166	-0.0322563		-0.0228587		545	557	0.0256537	0.0154472	0.0228678	0.00901289	0.0202433	0.011411	0.0213809	0.02894	0.047718	0.0274252		-0.0421716	-0.332209	-0.214348	-0.313682	-0.354819		-0.236503	-1.98313	-0.915047	-1.0171
566	575		1181.61	9	7.12-7.20	0.248458	0.2734	0.293019	0.311837	0.356732		0.241095	0.248996	0.323963	0.303813	0.346228	566	575	0.00736335	0.0244032	-0.0309441	0.00802471	0.010504		0.00387022		566	575	0.00341376	0.000535821	0.00160896	0.016642	0.014999	0.00237894	0	0.00222405	0	0		0.0662701	0.219628	-0.278497	0.0722224	0.0945358		3.06512	78.8836	-19.5251	0.835191
586	597		1472.7	11	9.44-9.52	0.131383	0.140977	0.185771	0.219624	0.234953		0.125849	0.150983	0.173091	0.192878	0.23178	586	597	0.00553351	-0.0100058	0.0126806	0.0267463	0.003173		0.00762551		586	597	0.0141062	0.0132851	0.0115441	0.0191866	0.0147893	0.0166739	0.0137414	0.0184863	0.0183723	0.0397659		0.0608687	-0.110064	0.139487	0.294209	0.034903		0.438833	-0.90673	1.00774	1.74391
598	606		878.462	8	10.40-10.43	0.0452797	0.112379	0.169289	0.319321	0.505497		0.0500269	0.117002	0.174895	0.31455	0.488586	598	606	-0.0047472	-0.00462313	-0.00560672	0.00477108	0.0169104		0.0013409		598	606	0.00743619	0.0111021	0.00394888	0.0116851	0.0022819	0.00375709	0	0.010295	0.00730485	0.00879459		-0.0379776	-0.0369851	-0.0448537	0.0381687	0.135284		-0.986913	-0.721263	-0.880721	0.599671
607	620		1590.89	12	12.81-12.86	0.21005	0.30211	0.35523	0.474086	0.550825		0.21374	0.30737	0.366553	0.485755	0.554138	607	620	-0.00369067	-0.0052592	-0.0113225	-0.011669	-0.00331356		-0.007051		607	620	0.0130985	0.00164813	0.00969366	0.00995261	0.0098046	0.00712985	0.0135299	0.00768781	0.00502687	0.00482102		-0.0442881	-0.0631104	-0.13587	-0.140028	-0.0397627		-0.42864	-0.668327	-1.58511	-1.81267
607	629		2548.29	21	12.74-12.78	0.121422	0.18422	0.265331	0.366548	0.443746		0.121403	0.190246	0.255973	0.360602	0.455273	607	629	1.92608e-05	-0.00602608	0.009358	0.00594534	-0.0115264		-0.000445984		607	629	0.00431777	0.0152434	0.00160576	0.00623795	0.00838237	0.0100269	0.0146349	0.0128355	0.00448323	0.0734119		0.000404478	-0.126548	0.196518	0.124852	-0.242055		0.00305585	-0.493929	1.25302	1.34051
631	638		876.555	7	8.98-9.04	-0.00335501	-0.0014467	-0.00258294	0.00266802	0.00552836		0.00154456	-0.00520192	-0.00782708	0.0114644	0.0029936	631	638	-0.00489957	0.00375522	0.00524414	-0.00879638	0.00253475		-0.000432367		631	638	0.0153586	0.0155358	0.0114422	0.0113738	0.0119369	0.0140087	0.0156373	0.0154109	0.0238352	0.0135166		-0.034297	0.0262866	0.036709	-0.0615746	0.0177433		-0.408235	0.295072	0.47322	-0.576898
632	638		777.487	6	10.91-10.98	-0.0307042	0.00229179	0.00207189	0.00677637	0.00476617		-0.018506	-0.0180418	0.00274453	0.00511244	0.0108289	632	638	-0.0121983	0.0203336	-0.000672637	0.00166393	-0.00606269		0.000612786		632	638	0.00592388	0.00717289	0.00554229	0.00661841	0.00514577	0.0105542	0.016256	0.00480224	0.00446667	0.00640995		-0.0731896	0.122001	-0.00403582	0.00998358	-0.0363761		-1.74567	1.98213	-0.158868	0.360945
642	648		777.4	6	12.76-12.83	-0.0124463	0.0119846	0.0034005	0.0580281	0.187518		0.0106679	0.0121985	0.0265396	0.0398694	0.172152	642	648	-0.0231142	-0.00021393	-0.0231391	0.0181587	0.0153662		-0.00258846		642	648	0.0189759	0.00149826	0.0154475	0.00965423	0.0148893	0.00624876	0.00823209	0.00500721	0.00943134	0.0360231		-0.138685	-0.00128358	-0.138834	0.108952	0.092197		-2.00393	-0.044284	-2.46804	2.33037
651	661		1248.59	9	8.12-8.19	0.0581211	0.0489023	0.0929536	0.191446	0.276532		0.0562662	0.0801335	0.0860313	0.185667	0.272336	651	661	0.00185489	-0.0312312	0.00692222	0.00577877	0.00419519		-0.00249602		651	661	0.0129182	0.0117439	0.0180315	0.0130376	0.0222343	0.0248231	0.0287801	0.0195022	0.0181386	0.0163025		0.016694	-0.281081	0.0623	0.052009	0.0377567		0.11481	-1.74025	0.451406	0.448074
656	670		1730.84	12	13.40-13.42	0.00884963	0.0412216	0.0506434	0.0938371	0.113401		-0.00916231	0.0105316	0.0357994	0.103041	0.0793351	656	670	0.0180119	0.03069	0.014844	-0.0092041	0.0340655		0.0176815		656	670	0.00987674	0.0025648	0.0132772	0.00936853	0.0120878	0.0306047	0.0284807	0.0279512	0.0297179	0.0670451		0.216143	0.368281	0.178128	-0.110449	0.408787		0.970106	1.85889	0.830864	-0.511623
657	669		1397.69	10	11.93-11.98	0.022021	0.0322446	0.08003	0.114344	0.131276		0.0174737	0.0353318	0.0817188	0.113866	0.125648	657	669	0.00454731	-0.00308716	-0.00168881	0.000478507	0.00562851		0.00117567		657	669	0.00792403	0.000442388	0.0066109	0.00802836	0.00681284	0.00646761	0.0065991	0.00564149	0.00713149	0.0128767		0.0454731	-0.0308716	-0.0168881	0.00478507	0.0562851		0.77003	-0.808466	-0.336573	0.0771811
674	689		1589.9	15	10.16-10.24	0.0992856	0.145556	0.184721	0.236305	0.291486		0.104738	0.156878	0.188471	0.243007	0.299634	674	689	-0.00545214	-0.0113216	-0.00374995	-0.00670129	-0.00814786		-0.00707457		674	689	0.0103567	0.0130118	0.00866736	0.00926478	0.0102261	0.0113545	0.0121773	0.00909194	0.0101848	0.00894537		-0.0817821	-0.169824	-0.0562493	-0.100519	-0.122218		-0.614469	-1.10035	-0.517072	-0.843023
675	689		1532.88	14	10.83-11.06	0.0544068	0.0762549	0.0818877	0.0942012	0.123636		0.0516398	0.0702118	0.0766462	0.0761743	0.0964382	675	689	0.00276706	0.00604307	0.00524158	0.0180269	0.027198		0.0118553		675	689	0.00535832	0.00141066	0.00499275	0.00530661	0.000579318	0.00631237	0.00331162	0.00566002	0.00321652	0.0142569		0.0387388	0.084603	0.0733821	0.252376	0.380772		0.57883	2.90783	1.20289	5.03171
677	686		1103.66	9	11.97-12.04	0.0364896	0.03361	0.0271235	0.0358786	0.0661896		0.0243615	0.0318811	0.0311554	0.0395368	0.0556156	677	686	0.012128	0.00172886	-0.00403184	-0.00365821	0.010574		0.00334816		677	686	0.00916617	0.00927413	0.0117008	0.0102129	0.0144474	0.00556119	0.00823566	0.00359088	0.00536368	0.00885672		0.109152	0.0155597	-0.0362866	-0.0329239	0.0951657		1.95932	0.24143	-0.570562	-0.549268
679	691		1372.78	12	9.24-9.31	0.514383	0.531458	0.540291	0.530121	0.529009		0.494094	0.536412	0.531087	0.543249	0.531096	679	691	0.0202892	-0.00495485	0.0092041	-0.0131272	-0.00208669		0.0018649		679	691	0.0109037	0.002751	0.0167042	0.00952289	0.0221549	0.0152393	0.00712674	0.0143677	0.00852886	0.0166356		0.24347	-0.0594582	0.110449	-0.157527	-0.0250403		1.87539	-1.12341	0.723544	-1.77858
682	691		1059.58	9	7.42-7.45	0.13479	0.256452	0.331915	0.44277	0.58728		0.130021	0.245303	0.33678	0.429968	0.570059	682	691	0.00476882	0.0111486	-0.00486534	0.0128013	0.0172204		0.00821476		682	691	0.00875622	0.00452388	0.00865937	0.00296136	0.00338474	0.0048733	0.0062476	0.00310332	0.00380945	0.00271078		0.0429194	0.100337	-0.0437881	0.115212	0.154984		0.824253	2.5034	-0.916114	4.59525
693	705		1584.78	10	12.12-12.18	0.0803321	0.0660645	0.0876524	0.124461	0.277353		0.0754352	0.0733373	0.0998284	0.132829	0.282466	693	705	0.00489687	-0.00727284	-0.012176	-0.00836701	-0.00511239		-0.00560627		693	705	0.0178843	0.00378896	0.00432881	0.00700866	0.00291821	0.00474836	0.00469985	0.00693537	0.00710418	0.0112106		0.0489687	-0.0727284	-0.12176	-0.0836701	-0.0511239		0.458368	-2.08664	-2.5796	-1.45218
696	705		1240.59	7	11.88-11.91	0.0580358	0.0402851	0.0771725	0.120161	0.270195		0.061936	0.0776768	0.0811171	0.125841	0.273675	696	705	-0.00390021	-0.0373917	-0.00394456	-0.00567932	-0.00348017		-0.0108792		696	705	0.0204793	0.0258237	0.0239448	0.0268663	0.0318503	0.0195211	0.0186358	0.0183426	0.0215294	0.0325987		-0.0273015	-0.261742	-0.0276119	-0.0397552	-0.0243612		-0.238767	-2.03368	-0.226509	-0.28572
696	712		2090.1	13	5.22-5.24	0.0520485	0.0808821	0.116346	0.167608	0.202213		0.0583533	0.0840011	0.139126	0.172362	0.20116	696	712	-0.00630482	-0.00311906	-0.0227796	-0.00475408	0.00105293		-0.00718092		696	712	0.0184313	0.0104638	0.0270689	0.0231292	0.00932227	0.0161416	0.0203266	0.0173327	0.0145286	0.0272828		-0.0819627	-0.0405478	-0.296134	-0.061803	0.0136881		-0.44572	-0.236305	-1.22751	-0.301471
710	716		870.577	6	8.31-8.39	0.146929	0.23769	0.369198	0.554735	0.67234		0.142907	0.241158	0.370915	0.542152	0.680754	710	716	0.00402164	-0.00346766	-0.00171741	0.0125833	-0.00841443		0.000601095		710	716	0.00255	0.00765522	0.0254104	0.0167328	0.022349	0.00265448	0.00900622	0.0169592	0.0190585	0.0193644		0.0241299	-0.020806	-0.0103045	0.0755	-0.0504866		1.89241	-0.508132	-0.0973696	0.859368
711	717		870.577	6	9.75-9.83	0.145992	0.200516	0.325011	0.47325	0.698289		0.105675	0.192858	0.313426	0.502556	0.698769	711	717	0.0403162	0.00765771	0.0115851	-0.0293057	-0.0004801		0.00595463		711	717	0.0117062	0.036004	0.0248154	0.0091602	0.0370821	0.0091092	0.0113637	0.00775199	0.0268846	0.0168376		0.241897	0.0459463	0.0695104	-0.175834	-0.0028806		4.70777	0.351308	0.771825	-1.78714
716	727		1327.79	10	4.63-4.64	0.030751	0.0232848	0.0321831	0.114782	0.282885		0.034893	0.0366875	0.0479497	0.113987	0.273232	716	727	-0.00414194	-0.0134027	-0.0157666	0.000795075	0.00965254		-0.00457272		716	727	0.00694522	0.0174075	0.00667761	0.0114879	0.0134893	0.00404925	0.00562985	0.0164333	0.0128654	0.0144016		-0.0414194	-0.134027	-0.157666	0.00795075	0.0965254		-0.892357	-1.26886	-1.53953	0.0798422
720	729		1175.68	8	9.19-9.26	0.190383	0.264502	0.335494	0.419578	0.457672		0.186228	0.276305	0.344652	0.420914	0.467603	720	729	0.00415448	-0.011803	-0.00915802	-0.00133601	-0.00993116		-0.00561474		720	729	0.00764813	0.0170198	0.01302	0.0136601	0.0204959	0.0168177	0.0258817	0.0138772	0.0122774	0.00396903		0.0332358	-0.0944239	-0.0732642	-0.0106881	-0.0794493		0.389484	-0.659966	-0.833585	-0.125991
729	746		2219.17	17	12.54-12.58	0.160456	0.215024	0.261202	0.355646	0.444289		0.146715	0.216076	0.259506	0.350769	0.440681	729	746	0.0137409	-0.00105127	0.00169614	0.00487726	0.0036079		0.00457419		729	746	0.0139969	0.00834996	0.0146509	0.0107257	0.0235918	0.018883	0.0122801	0.0110323	0.0160253	0.00718227		0.233596	-0.0178716	0.0288343	0.0829134	0.0613343		1.01255	-0.122617	0.160184	0.438079
733	750		2266.27	17	6.61-6.68	0.0573041	0.0800162	0.0625786	0.154175	0.460727		0.070068	0.0760698	0.0871392	0.159456	0.486105	733	750	-0.0127638	0.00394644	-0.0245607	-0.00528025	-0.0253778		-0.0128072		733	750	0.0179228	0.0215717	0.0109598	0.0247416	0.0247327	0.0130424	0.0130155	0.0178253	0.0357522	0.0136024		-0.216985	0.0670896	-0.417531	-0.0897642	-0.431422		-0.997365	0.271311	-2.03299	-0.21035
734	741		919.521	7	7.21-7.26	0.321595	0.492804	0.497506	0.572133	0.625756		0.326327	0.497415	0.518043	0.569696	0.6303	734	741	-0.00473198	-0.00461173	-0.0205371	0.00243774	-0.00454456		-0.00639753		734	741	0.00420959	0.00882068	0.0143699	0.00990128	0.0119529	0.0164586	0.0200151	0.0283333	0.0117518	0.0112539		-0.0331239	-0.0322821	-0.14376	0.0170642	-0.0318119		-0.482448	-0.365194	-1.11969	0.274766
736	745		1229.7	9	7.68-7.72	0.082658	0.193252	0.287698	0.457012	0.611511		0.0991765	0.188095	0.280862	0.453236	0.619453	736	745	-0.0165184	0.00515672	0.00683615	0.00377595	-0.00794196		-0.00173831		736	745	0.026732	0.00556816	0.00811095	0.00619569	0.00496235	0.0103942	0.00821078	0.00238441	0.00738226	0.00912189		-0.148666	0.0464104	0.0615254	0.0339836	-0.0714776		-0.997526	0.900304	1.40056	0.678604
771	778		886.572	7	6.41-6.45	0.0410834	0.127336	0.238796	0.387992	0.533874		0.0322098	0.119618	0.231365	0.393562	0.544241	771	778	0.00887356	0.00771855	0.00743028	-0.00557036	-0.0103674		0.00161693		771	778	0.0118126	0.0153352	0.0128783	0.0154731	0.0148588	0.00950448	0.016035	0.0121454	0.0133808	0.0154032		0.0621149	0.0540299	0.0520119	-0.0389925	-0.0725716		1.01371	0.602541	0.727015	-0.471645
771	781		1247.7	10	7.58-7.62	0.0933439	0.188966	0.259489	0.451031	0.645802		0.0949703	0.204811	0.284496	0.468955	0.6477	771	781	-0.00162642	-0.0158454	-0.0250073	-0.0179237	-0.00189821		-0.0124602		771	781	0.0057994	0.0133712	0.00648791	0.0111	0.01237	0.00613209	0.00708687	0.00660134	0.0152791	0.0143061		-0.0162642	-0.158454	-0.250073	-0.179237	-0.0189821		-0.333768	-1.81357	-4.67963	-1.64385
771	784		1634.83	13	7.74-7.80	0.0759821	0.162156	0.252754	0.399737	0.567857		0.0731537	0.170898	0.263737	0.410744	0.574273	771	784	0.00282836	-0.0087411	-0.0109836	-0.0110077	-0.00641607		-0.00686402		771	784	0.00531137	0.00531137	0.00531137	0.0149583	0.00531137	0.00531137	0.00531137	0.00531137	0.00819667	0.00531137		0.0367687	-0.113634	-0.142787	-0.1431	-0.083409		0.652189	-2.01561	-2.5327	-1.11778
771	787		1991.04	16	8.52-8.58	0.0562561	0.11853	0.189996	0.303341	0.445335		0.0532863	0.121002	0.193465	0.311577	0.4571	771	787	0.00296978	-0.00247229	-0.00346931	-0.00823629	-0.0117652		-0.00459466		771	787	0.0121575	0.00806259	0.012977	0.00911455	0.0167997	0.010588	0.0103493	0.0119879	0.0158728	0.0186488		0.0475164	-0.0395567	-0.055509	-0.131781	-0.188243		0.319061	-0.326403	-0.340134	-0.779394
792	805		1596.82	13	6.80-6.85	0.371514	0.48011	0.525856	0.545755	0.589187		0.347862	0.495859	0.530878	0.566693	0.588432	792	805	0.0236527	-0.0157489	-0.00502158	-0.0209377	0.000755568		-0.00345998		792	805	0.00450092	0.00113215	0.00966142	0.00166257	0.0114941	0.00242549	0.00802721	0.0129962	0.0165612	0.00856383		0.307485	-0.204736	-0.0652806	-0.27219	0.00982239		8.01268	-3.36488	-0.537091	-2.17881
796	811		1789.97	15	11.36-11.44	0.13489	0.215656	0.274098	0.366622	0.456275		0.132653	0.214353	0.284974	0.376048	0.467777	796	811	0.00223741	0.00130289	-0.0108759	-0.00942587	-0.0115015		-0.0056526		796	811	0.00318856	0.00303284	0.00341493	0.00426886	0.0193666	0.00469662	0.0142594	0.00271751	0.0104464	0.00569383		0.0335612	0.0195433	-0.163139	-0.141388	-0.172522		0.682668	0.154795	-4.31636	-1.44672
797	806		1059.58	9	7.13-7.18	0.0685973	0.0967166	0.128441	0.1846	0.337093		0.0651257	0.102982	0.131443	0.210424	0.33583	797	806	0.00347164	-0.00626567	-0.00300182	-0.0258235	0.00126302		-0.00607128		797	806	0.0201466	0.0270199	0.0261925	0.0114813	0.0123103	0.0162504	0.0221439	0.0242929	0.0114813	0.011566		0.0312448	-0.056391	-0.0270164	-0.232412	0.0113672		0.232311	-0.31065	-0.145542	-2.75469
819	828		943.546	9	6.60-6.65	0.138736	0.201088	0.226144	0.304465	0.406301		0.136693	0.20317	0.23453	0.305924	0.409401	819	828	0.00204279	-0.00208192	-0.00838607	-0.0014597	-0.0031		-0.00259698		819	828	0.00888806	0.0128866	0.0147919	0.0322257	0.0214033	0.0195287	0.0139677	0.0121894	0.0206645	0.0163358		0.0183851	-0.0187373	-0.0754746	-0.0131373	-0.0279		0.164904	-0.189748	-0.757811	-0.0660433
825	832		845.448	7	5.88-5.91	0.371729	0.48424	0.550435	0.644046	0.660611		0.369325	0.484763	0.536911	0.640678	0.672995	825	832	0.00240341	-0.000523028	0.0135245	0.0033678	-0.012384		0.00127774		825	832	0.0206026	0.0230435	0.0214763	0.0344719	0.0265776	0.027191	0.0229829	0.0308461	0.0492303	0.016093		0.0168239	-0.00366119	0.0946716	0.0235746	-0.0866881		0.122024	-0.0278351	0.623241	0.0970594
825	833		958.532	8	8.47-8.52	0.30186	0.424481	0.498813	0.641741	0.646728		0.311895	0.433243	0.526662	0.640342	0.677054	825	833	-0.0100354	-0.00876269	-0.0278487	0.00139851	-0.0303256		-0.0151148		825	833	0.0186903	0.0112172	0.0206108	0.0388211	0.0342675	0.0118897	0.0154049	0.0204698	0.0356384	0.0389985		-0.0802836	-0.0701015	-0.22279	0.0111881	-0.242604		-0.78468	-0.796461	-1.66051	0.0459646
845	854		1182.63	9	6.85-6.93	0.391306	0.546441	0.594501	0.628526	0.624203		0.34816	0.531688	0.601669	0.621573	0.618822	845	854	0.0431469	0.0147527	-0.00716833	0.0069529	0.00538076		0.012613		845	854	0	0.0207693	0.017231	0.00743234	0.00629303	0.00485041	0.00547745	0.0122245	0.0284051	0.0281698		0.388322	0.132775	-0.0645149	0.0625761	0.0484269		15.4075	1.18962	-0.587681	0.410157
863	875		1386.67	9	10.63-10.71	0.114368	0.20482	0.270802	0.362711	0.497831		0.117578	0.191813	0.280495	0.370099	0.482948	863	875	-0.00320945	0.0130068	-0.00969353	-0.00738823	0.0148828		0.00151967		863	875	0.00276285	0.0140498	0.00713151	0.00766468	0.0211005	0.0383352	0.0166554	0.00890862	0	0.0129322		-0.0288851	0.117061	-0.0872418	-0.066494	0.133945		-0.144634	1.0339	-1.4713	-1.66958
864	881		1851.89	13	8.67-8.72	0.635009	0.654528	0.660382	0.667277	0.666295		0.659026	0.657312	0.665594	0.678136	0.691844	864	881	-0.0240172	-0.0027845	-0.00521251	-0.0108582	-0.0255493		-0.0136843		864	881	0.0186743	0.00631952	0.00533398	0.00750666	0.0192107	0.00533398	0.00533398	0.00533398	0.00841688	0.0120985		-0.312224	-0.0361985	-0.0677627	-0.141157	-0.33214		-2.14195	-0.583202	-1.19685	-1.66758
868	875		867.439	4	11.42-11.46	-0.0231567	-0.00286567	0.0284582	0.0123481	0.00435746		-0.00472463	-0.011341	0.00234552	-0.00297687	-0.00421045	868	875	-0.0184321	0.00847537	0.0261127	0.015325	0.00856791		0.00800978		868	875	0.0259116	0.0193392	0.0201015	0.00757948	0.00810299	0.0214772	0.0019944	0.0101896	0.020181	0.0168101		-0.0737284	0.0339015	0.104451	0.0613	0.0342716		-0.948596	0.755065	2.00689	1.2313
872	878		710.42	4	7.49-7.54	0.0493321	0.236074	0.467304	0.718468	0.730703		0.0861063	0.231382	0.475979	0.715095	0.735114	872	878	-0.0367743	0.00469254	-0.00867575	0.00337313	-0.00441119		-0.0083591		872	878	0.00975634	0.0127183	0.0173381	0.0171668	0.00912649	0.0196955	0.0183444	0.00645075	0.00209403	0.0022056		-0.147097	0.0187701	-0.034703	0.0134925	-0.0176448		-2.89792	0.364112	-0.812296	0.33783
881	890		1096.6	7	13.29-13.32	0.0578264	0.0952827	0.211395	0.292632	0.336595		0.0479516	0.093865	0.21427	0.296772	0.341023	881	890	0.00987484	0.0014177	-0.00287463	-0.00413923	-0.00442814		-2.98934e-05		881	890	0.0151072	0.0170292	0.0194684	0.0234603	0.0214883	0.0175085	0.0262196	0.0171855	0.022081	0.0240548		0.0691239	0.00992388	-0.0201224	-0.0289746	-0.030997		0.739612	0.0785406	-0.191732	-0.222531
881	897		1770.9	14	5.91-5.93	0.640767	0.656097	0.671394	0.680381	0.682219		0.643714	0.670838	0.682879	0.683598	0.683556	881	897	-0.0029468	-0.0147409	-0.0114848	-0.00321684	-0.00133678		-0.00674522		881	897	0.0087177	0.0127342	0.00502878	0.017989	0.0426227	0.0155406	0.0129046	0.0205855	0.0133149	0.0089129		-0.0412552	-0.206373	-0.160787	-0.0450358	-0.0187149		-0.28644	-1.40829	-0.938716	-0.248954
882	897		1642.84	13	5.67-5.69	0.625871	0.635676	0.644407	0.638257	0.65216		0.63239	0.634394	0.654667	0.643084	0.647705	882	897	-0.00651871	0.00128175	-0.0102602	-0.00482698	0.00445499		-0.00317382		882	897	0.00615488	0.0423884	0.0123481	0.0515085	0.00611493	0.014133	0.00866544	0.00607692	0.00327417	0.00934351		-0.0847433	0.0166627	-0.133382	-0.0627507	0.0579149		-0.732451	0.0513127	-1.29128	-0.161988
882	899		1858.93	15	7.23-7.26	0.631695	0.634418	0.630254	0.64889	0.660608		0.625976	0.649149	0.654633	0.665405	0.670311	882	899	0.0057194	-0.0147309	-0.0243791	-0.0165148	-0.00970308		-0.0119217		882	899	0.0112011	0.00959682	0.0085196	0.00746756	0.0055404	0.00765104	0.0095006	0.00743572	0.0139239	0.0106524		0.085791	-0.220964	-0.365687	-0.247722	-0.145546		0.730296	-1.88941	-3.73412	-1.81042
885	897		1301.64	10	5.22-5.23	0.703886	0.702906	0.721639	0.70064	0.711358		0.716656	0.727024	0.741402	0.737361	0.718065	885	897	-0.0127693	-0.0241188	-0.0197631	-0.036721	-0.00670672		-0.0200158		885	897	0.00804075	0.0177516	0.0164073	0.0167836	0.0105428	0.0109681	0.01238	0.0106072	0.0359951	0.0159016		-0.127693	-0.241188	-0.197631	-0.36721	-0.0670672		-1.62629	-1.93026	-1.75206	-1.60145
892	904		1250.59	11	7.49-7.59	0.160911	0.164558	0.178643	0.171278	0.17697		0.161448	0.172011	0.17607	0.178011	0.179328	892	904	-0.000536906	-0.00745305	0.00257313	-0.00673284	-0.00235767		-0.00290147		892	904	0.0197624	0.0169229	0.0174509	0.0180493	0.0228271	0.0209669	0.0171366	0.0179879	0.0202841	0.018638		-0.00590597	-0.0819836	0.0283045	-0.0740612	-0.0259343		-0.0322758	-0.535997	0.177832	-0.429497
900	924		2660.52	20	10.10-10.16	0.756317	0.780886	0.790364	0.803928	0.811792		0.761734	0.790459	0.804795	0.810112	0.820366	900	924	-0.00541649	-0.00957291	-0.0144312	-0.00618448	-0.00857403		-0.00883582		900	924	0.00909209	0.00385649	0.00446858	0.00564485	0.00763425	0.00762769	0.0135433	0.0110466	0.00730515	0.0046891		-0.10833	-0.191458	-0.288624	-0.12369	-0.171481		-0.790504	-1.17747	-2.09762	-1.1603
903	913		1135.55	9	10.69-10.73	0.602635	0.642303	0.670799	0.685494	0.690261		0.605102	0.663486	0.692059	0.704595	0.718137	903	913	-0.0024675	-0.0211829	-0.0212604	-0.0191007	-0.0278761		-0.0183775		903	913	0.00666683	0.00683864	0.0193983	0.00613416	0.0169108	0.0129224	0.0118781	0.0272305	0.0252136	0.0165123		-0.0222075	-0.190646	-0.191343	-0.171906	-0.250885		-0.29392	-2.67691	-1.10141	-1.27493
912	929		1938.16	15	8.07-8.12	0.389118	0.460849	0.495201	0.541316	0.552765		0.392845	0.487166	0.5158	0.539582	0.551187	912	929	-0.00372687	-0.026317	-0.0205989	0.00173353	0.00157791		-0.00946627		912	929	0.0279761	0.023769	0.0175126	0.0252354	0.0164757	0.017685	0.0160193	0.0259457	0.0280698	0.0203286		-0.055903	-0.394755	-0.308984	0.026003	0.0236687		-0.195036	-1.59027	-1.13978	0.0795472
913	921		1026.63	7	11.97-12.13	0.141835	0.134928	0.153631	0.201911	0.177492		0.0856177	0.10638	0.12478	0.0984887	0.141856	913	921	0.0562175	0.0285482	0.0288514	0.103422	0.0356354		0.0505349		913	921	0.00315736	0.0150531	0.0063742	0.0161416	0.00863603	0.00896247	0.0119614	0.0243962	0.0305245	0.0207237		0.393522	0.199837	0.20196	0.723955	0.249448		10.2471	2.57177	1.98183	5.18779
913	923		1222.75	8	11.95-12.12	0.146829	0.154178	0.179933	0.253188	0.233179		0.112725	0.116305	0.120001	0.146632	0.170068	913	923	0.0341041	0.0378726	0.0599321	0.106556	0.0631114		0.0603153		913	923	0.0227785	0.0169437	0.0102047	0.024522	0.00902631	0.00778302	0.0202382	0.0202104	0.034966	0.0209578		0.272833	0.302981	0.479457	0.852449	0.504891		2.45394	2.48525	4.58492	4.32148
913	929		1837.12	14	11.00-11.07	0.664285	0.697524	0.71163	0.743882	0.756991		0.670481	0.703906	0.736152	0.754322	0.796932	913	929	-0.0061967	-0.00638177	-0.0245219	-0.0104401	-0.039941		-0.0174963		913	929	0.013486	0.0338091	0.00856994	0.0190151	0.0157088	0.0167908	0.0291401	0.0111305	0.0391144	0.038433		-0.0867537	-0.0893448	-0.343306	-0.146161	-0.559175		-0.498371	-0.247648	-3.02354	-0.415777
923	936		1577.89	12	4.96-4.98	0.382442	0.417394	0.422006	0.434226	0.436252		0.40607	0.434411	0.44046	0.437457	0.452835	923	936	-0.023628	-0.0170165	-0.0184535	-0.0032306	-0.0165832		-0.0157824		923	936	0.00283507	0.00185373	0.00653881	0.00698955	0.0106143	0.00519291	0.0180527	0.0151164	0.0143363	0.0122465		-0.283536	-0.204199	-0.221442	-0.0387672	-0.198999		-6.91717	-1.62409	-1.94064	-0.350832
925	933		968.494	7	9.89-9.92	0.654894	0.67398	0.710156	0.713765	0.74658		0.638201	0.706555	0.711582	0.735171	0.7558	925	933	0.0166934	-0.0325748	-0.00142644	-0.0214058	-0.00922004		-0.00958674		925	933	0.0120906	0.0163497	0.00142196	0.0169934	0.00668806	0.0156638	0.0115503	0.0177107	0.0115667	0.009258		0.116854	-0.228024	-0.00998507	-0.14984	-0.0645403		1.46123	-2.81852	-0.139054	-1.80362
925	934		1096.55	8	9.22-9.26	0.68021	0.705673	0.712958	0.720554	0.737179		0.675754	0.722241	0.742637	0.745159	0.76399	925	934	0.00445616	-0.0165679	-0.0296789	-0.0246047	-0.026811		-0.0186413		925	934	0	0.0112136	0	0	0.00965746	0.00241306	0	0.0145332	0.00943097	0		0.0356493	-0.132543	-0.237431	-0.196837	-0.214488		3.19855	-2.55907	-3.5371	-4.51879
927	934		922.488	6	9.10-9.12	0.65895	0.68065	0.6871	0.704376	0.71623		0.64248	0.67191	0.710191	0.751062	0.729033	927	934	0.0164701	0.0087403	-0.0230903	-0.0466866	-0.012803		-0.0114739		927	934	0	0.0026908	0.00695498	0.0152721	0	0.00319726	0	0.0153627	0.0174149	0.027646		0.0988209	0.0524418	-0.138542	-0.280119	-0.0768179		8.92236	5.62608	-2.37158	-3.49109
933	940		997.514	7	9.21-9.26	0.724235	0.736605	0.741339	0.753192	0.780172		0.693414	0.744831	0.765556	0.774652	0.778766	933	940	0.0308211	-0.00822644	-0.0242175	-0.0214603	0.0014064		-0.00433535		933	940	0.0231162	0.00695394	0.0017403	0.00978529	0.0215209	0.00816588	0.0250273	0.0226358	0.0221663	0.00834115		0.215748	-0.0575851	-0.169522	-0.150222	0.00984478		2.17749	-0.548542	-1.84762	-1.53406
933	944		1468.78	11	9.30-9.36	0.456741	0.560776	0.611133	0.699962	0.724846		0.442483	0.561261	0.626245	0.71581	0.727362	933	944	0.0142583	-0.000485075	-0.0151119	-0.0158475	-0.00251533		-0.0039403		933	944	0.0167943	0.00308412	0.0202828	0.00924478	0.00606567	0.0114308	0.00953541	0.0185071	0.000676255	0.0082521		0.156842	-0.00533582	-0.166231	-0.174322	-0.0276687		1.21564	-0.0838349	-0.953287	-2.96119
945	955		1401.73	10	6.13-6.15	0.101531	0.157644	0.275575	0.594966	0.78064		0.0999555	0.187972	0.286843	0.615938	0.783227	945	955	0.00157507	-0.0303278	-0.0112684	-0.0209724	-0.00258731		-0.0127161		945	955	0.0301291	0.0225084	0.0214951	0.0187094	0.0164275	0.0193782	0.0226206	0.0209281	0.0167279	0.0170846		0.0157507	-0.303278	-0.112684	-0.209724	-0.0258731		0.0761555	-1.64611	-0.650571	-1.44739
945	957		1586.81	12	6.18-6.20	0.081075	0.178354	0.315188	0.590035	0.739433		0.0857448	0.198179	0.334722	0.590927	0.745269	945	957	-0.00466978	-0.0198249	-0.0195336	-0.000892289	-0.00583619		-0.0101513		945	957	0.0113898	0.00311866	0.0042597	0.00392065	0.00391182	0.00984005	0.007224	0.00546119	0.0116943	0.0053092		-0.0560373	-0.237899	-0.234403	-0.0107075	-0.0700343		-0.537367	-4.36398	-4.88494	-0.125303
947	957		1330.69	10	5.26-5.27	0.0947258	0.202996	0.359248	0.61268	0.689753		0.0829955	0.231596	0.365747	0.634205	0.689824	947	957	0.0117303	-0.0285994	-0.00649925	-0.0215252	-7.0597e-05		-0.00899284		947	957	0.00388746	0.0128061	0.015041	0.00815925	0.0019291	0.0088109	0.00846955	0.00106433	0.00649224	0.0277751		0.117303	-0.285994	-0.0649925	-0.215252	-0.00070597		2.10973	-3.22634	-0.746555	-3.5756
974	989		1735.02	10	8.57-8.62	0.0600085	0.0892045	0.11055	0.172149	0.214226		0.0654863	0.100121	0.103699	0.166137	0.222517	974	989	-0.00547776	-0.0109163	0.00685134	0.00601134	-0.00829045		-0.00236436		974	989	0.0145012	0.0162951	0.015781	0.0164851	0.022191	0.0191196	0.0149661	0.0205767	0.0196327	0.0188013		-0.0547776	-0.109163	0.0685134	0.0601134	-0.0829045		-0.395378	-0.854579	0.457624	0.406147
986	997		1341.7	11	4.58-4.60	0.092392	0.0979951	0.104784	0.11493	0.127936		0.0983461	0.0953392	0.11191	0.122572	0.136753	986	997	-0.00595414	0.0026559	-0.00712619	-0.00764179	-0.00881628		-0.0053765		986	997	0.00795115	0.00773731	0.00934695	0.00576459	0.0101813	0.00802497	0.0141859	0.00752917	0.00742035	0.00757883		-0.0654955	0.0292149	-0.0783881	-0.0840597	-0.0969791		-0.91289	0.284685	-1.02838	-1.40862
986	1004		2197.16	18	5.49-5.59	0.108464	0.130382	0.163061	0.176794	0.189564		0.124635	0.151028	0.174001	0.177741	0.196173	986	1004	-0.0161716	-0.0206459	-0.0109398	-0.000947347	-0.0066092		-0.0110628		986	1004	0.00580821	0.00941418	0.00274561	0.00608582	0.00499983	0.00302894	0.0127014	0.00331235	0.0077694	0.00209129		-0.29109	-0.371627	-0.196916	-0.0170522	-0.118966		-4.27599	-2.26186	-4.40419	-0.16626
986	1007		2534.33	21	6.11-6.27	0.0994063	0.136357	0.176876	0.180116	0.199069		0.100509	0.14081	0.182986	0.219419	0.210929	986	1007	-0.0011032	-0.00445309	-0.00611023	-0.0393028	-0.0118594		-0.0125658		986	1007	0.00435672	0.00490967	0.0206236	0.00730149	0.00929431	0.0112869	0.0178368	0.0218457	0.0118426	0.022983		-0.0231672	-0.0935149	-0.128315	-0.82536	-0.249048		-0.157936	-0.416914	-0.352272	-4.89304
1037	1049		1451.83	12	6.73-6.78	0.133511	0.221339	0.289405	0.375133	0.438459		0.135785	0.224747	0.302648	0.388016	0.443198	1037	1049	-0.00227351	-0.00340846	-0.0132422	-0.0128831	-0.00473893		-0.00730923		1037	1049	0.0143055	0.0102874	0.00872761	0.00883881	0.0105126	0.015044	0.014708	0.00969764	0.00713706	0.00384677		-0.0272821	-0.0409015	-0.158906	-0.154597	-0.0568672		-0.189685	-0.328917	-1.75801	-1.96418
1037	1050		1598.9	13	8.87-8.97	0.151735	0.265864	0.33126	0.423239	0.474246		0.162297	0.281807	0.346051	0.434283	0.486178	1037	1050	-0.0105614	-0.0159429	-0.0147912	-0.0110437	-0.0119318		-0.0128542		1037	1050	0.0154772	0.00314237	0.00954948	0.00511332	0.0104264	0.00897049	0.00744214	0.00811538	0.00784087	0.0129626		-0.137299	-0.207258	-0.192285	-0.143569	-0.155113		-1.02259	-3.41827	-2.04428	-2.04344
1038	1044		808.442	6	6.19-6.26	0.0520072	0.108492	0.1212	0.210506	0.305823		0.0382803	0.0820955	0.0949259	0.201369	0.2931	1038	1044	0.0137269	0.0263965	0.0262736	0.00913781	0.0127224		0.0176514		1038	1044	0.013003	0.0153808	0.01641	0.0245224	0.015708	0.012991	0.0175567	0.0131112	0.0191866	0.0184893		0.0823612	0.158379	0.157642	0.0548269	0.0763343		1.29352	1.95878	2.16655	0.508318
1038	1049		1350.79	11	6.55-6.60	0.125476	0.21868	0.291723	0.377979	0.432169		0.128228	0.230661	0.295603	0.385103	0.442477	1038	1049	-0.00275142	-0.0119811	-0.00387965	-0.00712483	-0.0103083		-0.00720906		1038	1049	0.00938195	0.00990991	0.0117224	0.0109814	0.0123099	0.0123254	0.0112346	0.0107974	0.016881	0.0116923		-0.0302657	-0.131793	-0.0426761	-0.0783731	-0.113391		-0.30766	-1.38524	-0.421635	-0.612784
1038	1050		1497.85	12	8.81-8.92	0.134714	0.250531	0.324267	0.412727	0.462038		0.140151	0.268064	0.33325	0.418686	0.480351	1038	1050	-0.00543781	-0.0175326	-0.00898346	-0.00595908	-0.0183131		-0.0112452		1038	1050	0.00661542	0.00681542	0.00777774	0.00945622	0.00484527	0.00809328	0.00953234	0.00595697	0.00939701	0.00840709		-0.0652537	-0.210391	-0.107801	-0.071509	-0.219757		-0.90104	-2.59147	-1.58824	-0.774224
1041	1057		1879.98	16	6.93-7.03	0.384608	0.400322	0.393075	0.373906	0.432323		0.409521	0.412894	0.411573	0.418782	0.407887	1041	1057	-0.024913	-0.0125724	-0.0184979	-0.0448767	0.0244358		-0.0152848		1041	1057	0.0045334	0.0315921	0.00512649	0.0045334	0.00938022	0.00788097	0.0139323	0.0045334	0.0437869	0.0359919		-0.398607	-0.201158	-0.295967	-0.718027	0.390973		-4.74608	-0.630681	-4.68177	-1.76572
1050	1056		841.33	6	6.90-6.94	0.21215	0.28195	0.299741	0.357354	0.412941		0.231693	0.296442	0.308152	0.370797	0.424452	1050	1056	-0.0195433	-0.0144925	-0.00841045	-0.0134425	-0.0115114		-0.01348		1050	1056	0.0166316	0.0181993	0.0168913	0.0127189	0.0124386	0.0186833	0.0145619	0.0151567	0.0105438	0.0120759		-0.11726	-0.0869552	-0.0504627	-0.0806552	-0.0690687		-1.35327	-1.07696	-0.641887	-1.40931
1057	1065		831.421	8	7.41-7.43	0.0967091	0.115106	0.146593	0.25358	0.342044		0.102479	0.121183	0.148451	0.264719	0.342028	1057	1065	-0.00576978	-0.00607649	-0.0018584	-0.0111394	1.56716e-05		-0.00496567		1057	1065	0.0101601	0.00387239	0.000798134	0.00223172	0.00332873	0.00481772	0.00398638	0.00579646	0.0026541	0.00511772		-0.0461582	-0.0486119	-0.0148672	-0.0891149	0.000125373		-0.888754	-1.89378	-0.550121	-5.56393
1069	1087		2043.2	15	8.06-8.12	0.464969	0.574074	0.609258	0.647906	0.68408		0.448346	0.576895	0.634181	0.676136	0.693491	1069	1087	0.0166228	-0.0028203	-0.0249232	-0.0282297	-0.00941095		-0.00975226		1069	1087	0.0198765	0.0101489	0.0204899	0.0201699	0.018199	0.0173546	0.0256536	0.0214278	0.0185581	0.0102017		0.249342	-0.0423045	-0.373848	-0.423445	-0.141164		1.09114	-0.177065	-1.45604	-1.78394
1084	1090		826.514	5	8.04-8.08	0.359901	0.555262	0.673524	0.818681	0.849017		0.342461	0.561086	0.685232	0.802405	0.869248	1084	1090	0.0174397	-0.00582418	-0.0117087	0.0162752	-0.0202307		-0.000809731		1084	1090	0.0132612	0.0202233	0.0190767	0.0251696	0.0223185	0.0165546	0.0214579	0.0218439	0.0346334	0.0309501		0.0871985	-0.0291209	-0.0585433	0.0813761	-0.101154		1.42408	-0.342121	-0.699278	0.658428
1088	1097		1176.57	9	6.53-6.57	0.260202	0.330262	0.408495	0.504949	0.498519		0.261605	0.343524	0.41515	0.50139	0.503095	1088	1097	-0.00140232	-0.0132619	-0.00665506	0.00355904	-0.00457562		-0.00446716		1088	1097	0.00947413	0	0	0.00660017	0.0010937	0.00770813	0.0162575	0.0131552	0.00897595	0.00552554		-0.0126209	-0.119357	-0.0598955	0.0320313	-0.0411806		-0.198866	-1.4129	-0.876222	0.553293
1088	1098		1275.64	10	7.41-7.45	0.210335	0.288635	0.338487	0.419439	0.447218		0.226993	0.292764	0.353089	0.431122	0.46884	1088	1098	-0.0166578	-0.00412851	-0.0146016	-0.0116836	-0.0216221		-0.0137387		1088	1098	0.00809627	0.00623224	0.0103031	0.00316955	0.0121779	0.00724537	0.00802254	0.00362403	0.00222463	0.00421075		-0.166578	-0.0412851	-0.146016	-0.116836	-0.216221		-2.65554	-0.703898	-2.3156	-5.22592
1102	1112		1196.58	10	5.58-5.62	0.411832	0.416556	0.4886	0.488729	0.492131		0.363144	0.452962	0.47257	0.450447	0.462046	1102	1112	0.0486878	-0.0364061	0.01603	0.0382813	0.0300851		0.0193356		1102	1112	0.00942224	0.0532501	0.00866149	0.0108882	0.0131519	0.0451209	0.0241118	0.0143061	0.0356042	0.0241521		0.486878	-0.364061	0.1603	0.382813	0.300851		1.82951	-1.07874	1.66019	1.78087
1113	1121		895.452	8	9.00-9.03	0.0596043	0.085984	0.0996679	0.200586	0.26064		0.0571336	0.0845265	0.108688	0.229137	0.270793	1113	1121	0.00247071	0.00145746	-0.00902034	-0.0285507	-0.0101528		-0.00875914		1113	1121	0.0116416	0	0	0	0.0028291	0.00161082	0.00138843	0.0120073	0.0215979	0		0.0197657	0.0116597	-0.0721627	-0.228406	-0.0812224		0.364126	1.81816	-1.30118	-2.28963
1114	1121		824.415	7	8.81-8.85	0.10344	0.126834	0.135629	0.235935	0.315141		0.106651	0.121393	0.138906	0.248779	0.319358	1114	1121	-0.00321045	0.00544094	-0.00327783	-0.0128448	-0.00421642		-0.00362171		1114	1121	0.00781365	0	0.00382601	0	0.000152665	0.00620746	0.00263817	0.0114175	0.00123433	0.00394009		-0.0224731	0.0380866	-0.0229448	-0.0899134	-0.0295149		-0.557221	3.57217	-0.471483	-18.0242
1122	1132		1191.58	10	9.69-9.75	0.25637	0.261516	0.277999	0.315425	0.3161		0.248826	0.277341	0.290218	0.322187	0.341786	1122	1132	0.00754343	-0.0158252	-0.0122188	-0.00676284	-0.0256863		-0.0105899		1122	1132	0.00204149	0.0171397	0.00796731	0.0024994	0.00273224	0.0103201	0.00518075	0.0107285	0.00709194	0.00736403		0.0754343	-0.158252	-0.122188	-0.0676284	-0.256863		1.24196	-1.53081	-1.5837	-1.55776
1125	1134		1136.53	9	10.19-10.57	0.0914849	0.145468	0.162181	0.1793	0.246721		0.0781826	0.136361	0.167084	0.187005	0.243326	1125	1134	0.0133023	0.00910763	-0.00490216	-0.00770481	0.00339453		0.0026395		1125	1134	0.0019063	0.00424013	0	0	0.00501924	0.0105313	0.00805755	0.00260547	0.00407081	0.00636551		0.119721	0.0819687	-0.0441194	-0.0693433	0.0305507		2.1528	1.73253	-3.25883	-3.27825
1133	1143		1297.73	10	8.88-8.99	0.125486	0.221981	0.310381	0.401504	0.424523		0.1085	0.24479	0.324511	0.395874	0.42374	1133	1143	0.016986	-0.0228097	-0.01413	0.00563075	0.000783284		-0.00270794		1133	1143	0.012681	0.0246928	0.0183681	0.0124828	0.0162794	0.0138628	0.0129755	0.0408369	0.019296	0.0164564		0.16986	-0.228097	-0.1413	0.0563075	0.00783284		1.56593	-1.41632	-0.546565	0.424371
1136	1144		1010.6	8	9.04-9.10	0.149485	0.192368	0.24247	0.268901	0.30172		0.143897	0.198887	0.2481	0.268817	0.307743	1136	1144	0.00558787	-0.00651884	-0.00563022	8.43284e-05	-0.00602313		-0.0025		1136	1144	0.0045194	0.0187007	0.00486175	0.00396343	0.00366269	0.00432948	0.0124304	0.00391045	0.00669347	0.00637239		0.044703	-0.0521507	-0.0450418	0.000674627	-0.0481851		1.54644	-0.502823	-1.56298	0.0187766
1137	1148		1288.69	11	8.76-8.81	0.256653	0.328474	0.367437	0.453882	0.507611		0.241422	0.338822	0.348728	0.433121	0.508464	1137	1148	0.0152308	-0.0103475	0.0187091	0.0207612	-0.000852917		0.00870014		1137	1148	0.0053673	0.00374166	0.00802687	0.0135083	0.00676336	0.00556011	0.00146147	0.00582768	0	0.000466893		0.167539	-0.113822	0.2058	0.228373	-0.00938209		3.41361	-4.46169	3.26687	2.66203
1142	1148		708.393	6	9.45-9.52	0.157168	0.314746	0.398198	0.412938	0.418267		0.140327	0.296466	0.397127	0.409939	0.421895	1142	1148	0.0168405	0.0182801	0.00107114	0.00299876	-0.00362836		0.00711244		1142	1148	0.0342697	0.0138833	0.0277565	0.0184585	0.0136883	0.0259179	0.0233799	0.0263137	0.0341134	0.0168204		0.101043	0.109681	0.00642687	0.0179925	-0.0217701		0.678865	1.16442	0.0485078	0.13391
1156	1167		1143.48	11	9.87-9.90	0.055767	0.0980265	0.118677	0.124056	0.148599		0.0598001	0.101879	0.124028	0.128136	0.144301	1156	1167	-0.00403311	-0.00385251	-0.00535115	-0.00407965	0.00429742		-0.0026038		1156	1167	0.00931696	0.00315522	0.00857476	0.00907422	0.00579932	0.00456174	0.00312754	0.00135034	0.00830556	0.00224722		-0.0443642	-0.0423776	-0.0588627	-0.0448761	0.0472716		-0.673385	-1.50198	-1.06774	-0.57442
1174	1183		1077.51	7	9.51-9.58	0.00384904	0.00218849	0.00586077	0.0306829	0.0827731		-0.00813284	-0.00275075	-0.00815672	0.0302369	0.0664309	1174	1183	0.0119819	0.00493923	0.0140175	0.000446055	0.0163422		0.00954537		1174	1183	0.0181588	0.00998913	0.00507633	0.0127038	0.0243928	0.00507633	0.0318874	0.0317595	0.00632878	0.0176175		0.0838731	0.0345746	0.0981224	0.00312239	0.114396		1.10067	0.25602	0.754882	0.0544347
1200	1208		885.479	8	6.28-6.29	0.0561494	0.0765015	0.078195	0.0926218	0.173284		0.0548957	0.0723373	0.0762912	0.0998757	0.170144	1200	1208	0.00125373	0.00416418	0.00190373	-0.00725392	0.0031403		0.000641604		1200	1208	0.0266787	0.0252067	0.0198037	0.0181918	0.0271252	0.0212155	0.0175993	0.021669	0.0342726	0.019839		0.0100299	0.0333134	0.0152299	-0.0580313	0.0251224		0.0637074	0.234611	0.112326	-0.323807
1203	1209		731.332	6	4.67-4.68	0.0757888	0.0948965	0.109289	0.116913	0.207611		0.0825007	0.0877062	0.0729677	0.110658	0.198067	1203	1209	-0.00671194	0.0071903	0.0363209	0.00625572	0.00954403		0.0105198		1203	1209	0.0117045	0.012591	0.00228358	0.00181716	0.0028194	0.00528209	0.0135968	0.0146714	0.00928234	0.00310249		-0.0402716	0.0431418	0.217925	0.0375343	0.0572642		-0.905325	0.672053	4.2369	1.14555
1203	1212		1048.47	9	7.79-7.81	0.0682803	0.0757232	0.0805239	0.103216	0.169435		0.0785255	0.0871264	0.0779494	0.106528	0.173046	1203	1212	-0.0102453	-0.0114032	0.00257446	-0.00331194	-0.00361144		-0.00519947		1203	1212	0.00703416	0.00579917	0.00570332	0.00642886	0.00454527	0.0037461	0.00149221	0	0.00696302	0.00567231		-0.0922075	-0.102628	0.0231701	-0.0298075	-0.032503		-2.22666	-3.29836	0.781843	-0.605301
1213	1224		1526.71	11	11.07-11.15	0.0538825	0.0785323	0.109269	0.19073	0.290199		0.0627687	0.0879281	0.138172	0.185624	0.31362	1213	1224	-0.00888616	-0.00939579	-0.0289034	0.00510597	-0.0234204		-0.0130999		1213	1224	0.00334953	0.00569023	0.00387381	0.011276	0.00626228	0	0.0054559	0.0101285	0.000185482	0.00166418		-0.0977478	-0.103354	-0.317937	0.0561657	-0.257624		-4.59506	-2.06438	-4.61657	0.784198
1213	1225		1712.79	12	12.70-12.82	0.0392257	0.0319343	0.0553884	0.0642277	0.075579		0.0351474	0.0380553	0.07104	0.04972	0.0624317	1213	1225	0.00407836	-0.00612102	-0.0156516	0.0145077	0.0131473		0.00199214		1213	1225	0.0106168	0.0179733	0.0168966	0.0108551	0.01057	0.016993	0.012791	0.0159641	0.0126159	0.0154644		0.0489403	-0.0734522	-0.187819	0.174093	0.157767		0.352545	-0.480592	-1.16623	1.50982
1221	1240		2221.14	15	5.90-5.94	0.0609127	0.0684513	0.102735	0.154074	0.170295		0.0611017	0.0834849	0.116666	0.173689	0.182837	1221	1240	-0.000188955	-0.0150335	-0.0139311	-0.0196147	-0.0125425		-0.0122622		1221	1240	0.00809572	0.00794965	0.00726557	0.0162173	0.0125256	0.0126126	0.00822607	0.012414	0.0109964	0.0143034		-0.00283433	-0.225503	-0.208967	-0.294221	-0.188137		-0.0218372	-2.2762	-1.67753	-1.73389
1225	1246		2360.17	17	10.35-10.40	0.203252	0.270187	0.33921	0.438601	0.476965		0.192957	0.280359	0.358094	0.470036	0.49253	1225	1246	0.010295	-0.010172	-0.0188832	-0.0314353	-0.0155648		-0.0131521		1225	1246	0.00499192	0.000274451	0.000274451	0.00142774	0.000274451	0.00588701	0.000274451	0.00370939	0.00420378	0.00626708		0.175015	-0.172924	-0.321015	-0.5344	-0.264601		2.31021	-45.3927	-8.79323	-12.264
1245	1256		1262.61	9	5.64-5.66	0.15342	0.163156	0.1853	0.244462	0.344933		0.157492	0.172629	0.184477	0.230186	0.350633	1245	1256	-0.0040728	-0.0094733	0.000823217	0.0142765	-0.0056995		-0.000829187		1245	1256	0.0075131	0.00786352	0.00402935	0.00750448	0.000859204	0.00346584	0.00647247	0.00473781	0.00774826	0.00252604		-0.0366552	-0.0852597	0.00740896	0.128488	-0.0512955		-0.852589	-1.61107	0.229254	2.29241
1247	1256		986.461	7	9.88-9.92	0.193688	0.301898	0.351719	0.391899	0.394391		0.193459	0.301339	0.359509	0.387567	0.395818	1247	1256	0.000229424	0.000558849	-0.00779041	0.00433177	-0.00142687		-0.000819446		1247	1256	0.00212495	0.00404478	0.00728465	0	0	0.000211514	0.0103812	0.00511919	0.0107825	0.0106977		0.00160597	0.00391194	-0.0545328	0.0303224	-0.00998806		0.186085	0.0868792	-1.51551	0.695834
1257	1263		694.308	6	7.37-7.39	0.0834808	0.0976928	0.10703	0.155253	0.311896		0.0814363	0.110989	0.108074	0.177779	0.327239	1257	1263	0.00204453	-0.0132965	-0.00104378	-0.0225259	-0.0153423		-0.0100328		1257	1263	0.0145052	0.00307761	0.00682861	0.0291923	0.00740746	0.00421866	0.00864254	0.00397363	0.00561642	0.00507114		0.0122672	-0.0797791	-0.00626269	-0.135155	-0.0920537		0.234421	-2.51034	-0.228828	-1.31245
1279	1287		792.373	7	12.65-12.70	0.0139957	0.0121392	0.0281819	0.0490026	0.115497		0.00939083	0.01929	0.0268228	0.0505271	0.090513	1279	1287	0.0046049	-0.00715075	0.00135906	-0.00152452	0.0249842		0.00445458		1279	1287	0.00968102	0.00912772	0.0118542	0.0152953	0.0120486	0.0114495	0.00812814	0.00451429	0.0156565	0.0291983		0.0322343	-0.0500552	0.00951343	-0.0106716	0.17489		0.53195	-1.01336	0.185576	-0.120641
1291	1300		1207.67	9	7.78-7.83	0.187987	0.273799	0.316669	0.446014	0.591056		0.196571	0.273656	0.32975	0.449443	0.584924	1291	1300	-0.00858391	0.000142952	-0.0130803	-0.00342886	0.00613151		-0.00376371		1291	1300	0.0175156	0.0137879	0.0105496	0.00156385	0.017542	0.0144869	0.0132934	0.00578939	0.00790713	0.00350929		-0.0772552	0.00128657	-0.117722	-0.0308597	0.0551836		-0.654095	0.0129278	-1.88268	-0.736816
1293	1299		789.435	6	12.22-12.34	0.0212744	0.0239368	0.0211843	0.0525808	0.118996		0.0180923	0.0257706	0.0334229	0.0547813	0.0926341	1293	1299	0.00318209	-0.00183383	-0.0122386	-0.0022005	0.0263617		0.00265418		1293	1299	0.00940025	0.00664254	0.0118119	0.0255861	0.0134843	0.0160075	0.010701	0.00539851	0.0428254	0.0127209		0.0190925	-0.011003	-0.0734313	-0.013203	0.15817		0.296902	-0.252186	-1.63221	-0.076401
1296	1303		890.41	7	7.07-7.11	0.0510723	0.0510245	0.0671192	0.0666333	0.0789183		0.0839885	0.0715458	0.0826162	0.0913921	0.0890774	1296	1303	-0.0329162	-0.0205213	-0.015497	-0.0247588	-0.0101591		-0.0207705		1296	1303	0.0182876	0.0266394	0.0175286	0.0284102	0.0228439	0.0161945	0.0204262	0.0190205	0.0175765	0.0241207		-0.230413	-0.143649	-0.108479	-0.173312	-0.0711134		-2.33396	-1.05883	-1.03773	-1.28364
1318	1329		1341.71	9	7.82-7.85	0.0422637	0.0682275	0.115738	0.211423	0.324696		0.0387655	0.091466	0.121984	0.248519	0.319363	1318	1329	0.00349818	-0.0232385	-0.00624577	-0.0370954	0.00533284		-0.0115497		1318	1329	0.0186658	0.0160303	0.0199381	0.0358259	0.017366	0.0175159	0.0146	0.0250439	0.0446169	0.00645257		0.0314836	-0.209146	-0.0562119	-0.333858	0.0479955		0.236706	-1.85634	-0.337942	-1.12287
1331	1355		2681.45	24	17.31-17.41	0.0809767	0.104095	0.129508	0.130343	0.117355		0.0671854	0.114551	0.130375	0.127625	0.13193	1331	1355	0.0137913	-0.0104554	-0.000867102	0.0027176	-0.0145745		-0.00187762		1331	1355	0.0114247	0.00502544	0.0155785	0.0188053	0.0180389	0.023396	0.0139689	0.0217716	0.0163277	0.0401484		0.330991	-0.25093	-0.0208104	0.0652224	-0.349788		0.917453	-1.21986	-0.0561002	0.189003
1335	1343		952.473	8	7.43-7.45	0.238744	0.438055	0.549601	0.614962	0.69259		0.226255	0.445227	0.554578	0.614095	0.70498	1335	1343	0.0124886	-0.00717201	-0.00497705	0.000867724	-0.0123896		-0.00223646		1335	1343	0.00299646	0.00669795	0.00303358	0.00384422	0.00870914	0.0035916	0.00852295	0.00542705	0.00616418	0.00267071		0.099909	-0.0573761	-0.0398164	0.00694179	-0.0991164		4.62453	-1.14598	-1.38652	0.206884
1338	1344		828.389	6	9.58-9.63	0.260071	0.472316	0.545036	0.584382	0.675187		0.244375	0.473824	0.557171	0.595882	0.663316	1338	1344	0.0156965	-0.00150746	-0.0121353	-0.0115002	0.0118704		0.000484776		1338	1344	0.0215209	0.00890348	0.00996343	0.0225749	0.0184363	0.0289114	0.0359838	0.0082602	0.0140808	0.0345818		0.0941791	-0.00904478	-0.0728119	-0.0690015	0.0712224		0.754321	-0.0704363	-1.62407	-0.748658
1348	1356		944.552	8	6.84-6.89	0.0432146	0.0438244	0.0638332	0.0960815	0.112264		0.0575817	0.0538894	0.0632534	0.0980129	0.117071	1348	1356	-0.0143672	-0.0100649	0.000579851	-0.00193134	-0.00480634		-0.00611799		1348	1356	0.0260659	0.0185474	0.0209058	0.00571082	0.0138216	0.0158129	0.00751175	0.0232366	0.0173297	0.00469869		-0.114937	-0.0805194	0.00463881	-0.0154507	-0.0384507		-0.81623	-0.871178	0.0321316	-0.183334
[truncated: 8 more columns]

## Sheet: DynamX_Data
Protein	Start	End	Sequence	Modification	Fragment	MaxUptake	MHP	State	Exposure	Center	Center SD	Uptake	Uptake SD	RT	RT SD
Beclin1	13	26	QVSFVCQRCSQPLK			12	1622.81	Apo	0	1623.68	2.27374e-13	0	0	12.629	0
Beclin1	13	26	QVSFVCQRCSQPLK			12	1622.81	Apo	0.005	1624.15	0.070781	0.466642	0.070781	12.6268	0.009482
Beclin1	13	26	QVSFVCQRCSQPLK			12	1622.81	Apo	0.05	1624.45	0.032776	0.77228	0.032776	12.6288	0.001817
Beclin1	13	26	QVSFVCQRCSQPLK			12	1622.81	Apo	0.5	1624.92	0.096057	1.24026	0.096057	12.624	0.008289
Beclin1	13	26	QVSFVCQRCSQPLK			12	1622.81	Apo	5	1625.51	0.073462	1.8283	0.073462	12.6516	0.015044
Beclin1	13	26	QVSFVCQRCSQPLK			12	1622.81	Apo	50	1626.83	0.171609	3.15082	0.171609	12.6742	0.006072
Beclin1	13	26	QVSFVCQRCSQPLK			12	1622.81	Lipids	0	1623.68	2.27374e-13	0	0	12.629	0
Beclin1	13	26	QVSFVCQRCSQPLK			12	1622.81	Lipids	0.005	1624.14	0.1002	0.459224	0.1002	12.6329	0.006152
Beclin1	13	26	QVSFVCQRCSQPLK			12	1622.81	Lipids	0.05	1624.32	0.104099	0.64227	0.104099	12.6361	0.010513
Beclin1	13	26	QVSFVCQRCSQPLK			12	1622.81	Lipids	0.5	1624.81	0.005853	1.13255	0.005853	12.6546	0.015421
Beclin1	13	26	QVSFVCQRCSQPLK			12	1622.81	Lipids	5	1625.4	0.175002	1.72211	0.175002	12.6624	0.006515
Beclin1	13	26	QVSFVCQRCSQPLK			12	1622.81	Lipids	50	1626.65	0.129998	2.96714	0.129998	12.6815	0.006756
Beclin1	17	27	VCQRCSQPLKL			9	1274.67	Apo	0	1275.45	0.001788	0	0	8.23263	0.004031
Beclin1	17	27	VCQRCSQPLKL			9	1274.67	Apo	0.005	1276.18	0.087974	0.727791	0.087992	8.28335	0.026539
Beclin1	17	27	VCQRCSQPLKL			9	1274.67	Apo	0.05	1276.28	0.074975	0.82672	0.074996	8.28844	0.007482
Beclin1	17	27	VCQRCSQPLKL			9	1274.67	Apo	0.5	1276.38	0.11966	0.935929	0.119673	8.29073	0.005469
Beclin1	17	27	VCQRCSQPLKL			9	1274.67	Apo	5	1276.4	0.077722	0.952818	0.077743	8.32763	0.004739
Beclin1	17	27	VCQRCSQPLKL			9	1274.67	Apo	50	1276.57	0.115345	1.12017	0.115359	8.33209	0.001219
Beclin1	17	27	VCQRCSQPLKL			9	1274.67	Lipids	0	1275.45	0.001788	0	0	8.23263	0.004031
Beclin1	17	27	VCQRCSQPLKL			9	1274.67	Lipids	0.005	1276.1	0.07103	0.655593	0.071053	8.30302	0.005886
Beclin1	17	27	VCQRCSQPLKL			9	1274.67	Lipids	0.05	1276.28	0.088048	0.835173	0.088066	8.31247	0.013462
Beclin1	17	27	VCQRCSQPLKL			9	1274.67	Lipids	0.5	1276.36	0.059416	0.909047	0.059442	8.32205	0.008903
Beclin1	17	27	VCQRCSQPLKL			9	1274.67	Lipids	5	1276.45	0.060813	1.00593	0.06084	8.344	0.00498
Beclin1	17	27	VCQRCSQPLKL			9	1274.67	Lipids	50	1276.72	0.069187	1.26996	0.06921	8.35061	0.002021
Beclin1	27	59	LDTSFKILDRVTIQELTAPLLTTAQAKPGETQE			30	3627.95	Apo	0	3629.76	0	0	0	7.24894	0
Beclin1	27	59	LDTSFKILDRVTIQELTAPLLTTAQAKPGETQE			30	3627.95	Apo	0.005	3637.62	0.066124	7.86549	0.066124	7.25981	0.01516
Beclin1	27	59	LDTSFKILDRVTIQELTAPLLTTAQAKPGETQE			30	3627.95	Apo	0.05	3637.93	0.109256	8.16882	0.109256	7.26155	0.003131
Beclin1	27	59	LDTSFKILDRVTIQELTAPLLTTAQAKPGETQE			30	3627.95	Apo	0.5	3638	0.055751	8.24048	0.055751	7.27407	0.022562
Beclin1	27	59	LDTSFKILDRVTIQELTAPLLTTAQAKPGETQE			30	3627.95	Apo	5	3638.2	0.219101	8.4416	0.219101	7.28045	0.009845
Beclin1	27	59	LDTSFKILDRVTIQELTAPLLTTAQAKPGETQE			30	3627.95	Apo	50	3638.45	0.336648	8.6946	0.336648	7.28574	0.005953
Beclin1	27	59	LDTSFKILDRVTIQELTAPLLTTAQAKPGETQE			30	3627.95	Lipids	0	3629.76	0	0	0	7.24894	0
Beclin1	27	59	LDTSFKILDRVTIQELTAPLLTTAQAKPGETQE			30	3627.95	Lipids	0.005	3637.75	0.143459	7.99045	0.143459	7.26287	0.005177
Beclin1	27	59	LDTSFKILDRVTIQELTAPLLTTAQAKPGETQE			30	3627.95	Lipids	0.05	3637.93	0.111729	8.17445	0.111729	7.27268	0.007702
Beclin1	27	59	LDTSFKILDRVTIQELTAPLLTTAQAKPGETQE			30	3627.95	Lipids	0.5	3638.23	0.180181	8.47606	0.180181	7.27543	0.007002
Beclin1	27	59	LDTSFKILDRVTIQELTAPLLTTAQAKPGETQE			30	3627.95	Lipids	5	3638.44	0.164872	8.68237	0.164872	7.2943	0.004238
Beclin1	27	59	LDTSFKILDRVTIQELTAPLLTTAQAKPGETQE			30	3627.95	Lipids	50	3638.76	0.079983	9.00099	0.079983	7.29501	0.007504
Beclin1	28	44	DTSFKILDRVTIQELTA			16	1950.05	Apo	0	1951.78	0.076111	0	0	5.46247	0.000614
Beclin1	28	44	DTSFKILDRVTIQELTA			16	1950.05	Apo	0.005	1952.85	0.034101	1.0645	0.083401	5.48752	0.008865
Beclin1	28	44	DTSFKILDRVTIQELTA			16	1950.05	Apo	0.05	1953.04	0.047999	1.25378	0.089982	5.49735	0.003442
Beclin1	28	44	DTSFKILDRVTIQELTA			16	1950.05	Apo	0.5	1953.36	0.081336	1.57365	0.111393	5.50922	0.007537
Beclin1	28	44	DTSFKILDRVTIQELTA			16	1950.05	Apo	5	1953.33	0.04054	1.54535	0.086234	5.53641	0.009044
Beclin1	28	44	DTSFKILDRVTIQELTA			16	1950.05	Apo	50	1953.31	0.121858	1.52776	0.143674	5.55642	0.010664
Beclin1	28	44	DTSFKILDRVTIQELTA			16	1950.05	Lipids	0	1951.78	0.076111	0	0	5.46247	0.000614
Beclin1	28	44	DTSFKILDRVTIQELTA			16	1950.05	Lipids	0.005	1952.72	0.093318	0.932931	0.12042	5.50424	0.013372
Beclin1	28	44	DTSFKILDRVTIQELTA			16	1950.05	Lipids	0.05	1953.12	0.064311	1.33704	0.099643	5.52013	0.013357
Beclin1	28	44	DTSFKILDRVTIQELTA			16	1950.05	Lipids	0.5	1953.41	0.021821	1.62918	0.079177	5.53749	0.008079
Beclin1	28	44	DTSFKILDRVTIQELTA			16	1950.05	Lipids	5	1953.22	0.156155	1.43723	0.173716	5.56919	0.013093
Beclin1	28	44	DTSFKILDRVTIQELTA			16	1950.05	Lipids	50	1953.38	0.048726	1.59925	0.090372	5.5973	0.013658
Beclin1	42	48	LTAPLLT			5	728.455	Apo	0	728.798	0	0	0	10.1219	0
Beclin1	42	48	LTAPLLT			5	728.455	Apo	0.005	730.025	0.00482	1.22684	0.00482	10.1365	0.010158
Beclin1	42	48	LTAPLLT			5	728.455	Apo	0.05	730.618	0.011734	1.82022	0.011734	10.1281	0.002805
Beclin1	42	48	LTAPLLT			5	728.455	Apo	0.5	730.742	0.009195	1.94439	0.009195	10.1322	0.001289
Beclin1	42	48	LTAPLLT			5	728.455	Apo	5	730.933	0.032633	2.13473	0.032633	10.1491	0.008242
Beclin1	42	48	LTAPLLT			5	728.455	Apo	50	731.236	0.027838	2.43767	0.027838	10.1566	0.002152
Beclin1	42	48	LTAPLLT			5	728.455	Lipids	0	728.798	0	0	0	10.1219	0
Beclin1	42	48	LTAPLLT			5	728.455	Lipids	0.005	729.996	0.013172	1.19765	0.013172	10.1402	0.009759
Beclin1	42	48	LTAPLLT			5	728.455	Lipids	0.05	730.619	0.006468	1.82078	0.006468	10.1408	0.003962
Beclin1	42	48	LTAPLLT			5	728.455	Lipids	0.5	730.702	0.01746	1.90349	0.01746	10.1458	0.005952
Beclin1	42	48	LTAPLLT			5	728.455	Lipids	5	730.853	0.013714	2.05496	0.013714	10.1593	0.002714
Beclin1	42	48	LTAPLLT			5	728.455	Lipids	50	731.229	0.028994	2.43111	0.028994	10.1638	0.000913
Beclin1	42	49	LTAPLLTT			6	829.503	Apo	0	829.898	0	0	0	10.1654	0
Beclin1	42	49	LTAPLLTT			6	829.503	Apo	0.005	831.712	0.052349	1.81371	0.052349	10.1804	0.011045
Beclin1	42	49	LTAPLLTT			6	829.503	Apo	0.05	832.247	0.09807	2.34861	0.09807	10.1662	0.003399
Beclin1	42	49	LTAPLLTT			6	829.503	Apo	0.5	832.406	0.014112	2.50823	0.014112	10.1708	0.002676
Beclin1	42	49	LTAPLLTT			6	829.503	Apo	5	832.518	0.065486	2.62036	0.065486	10.186	0.006998
Beclin1	42	49	LTAPLLTT			6	829.503	Apo	50	832.86	0.060483	2.96193	0.060483	10.1919	0.001565
Beclin1	42	49	LTAPLLTT			6	829.503	Lipids	0	829.898	0	0	0	10.1654	0
Beclin1	42	49	LTAPLLTT			6	829.503	Lipids	0.005	831.571	0.029671	1.6725	0.029671	10.1793	0.008819
Beclin1	42	49	LTAPLLTT			6	829.503	Lipids	0.05	832.258	0.009339	2.36041	0.009339	10.1747	0.002855
Beclin1	42	49	LTAPLLTT			6	829.503	Lipids	0.5	832.403	0.013058	2.50518	0.013058	10.1802	0.007065
Beclin1	42	49	LTAPLLTT			6	829.503	Lipids	5	832.499	0.068797	2.60079	0.068797	10.1918	0.00457
Beclin1	42	49	LTAPLLTT			6	829.503	Lipids	50	832.929	0.0836	3.03081	0.0836	10.1955	0.001173
Beclin1	60	72	EETNSGEEPFIET			11	1481.63	Apo	0	1482.29	0	0	0	9.97696	0
Beclin1	60	72	EETNSGEEPFIET			11	1481.63	Apo	0.005	1485.73	0.035306	3.44195	0.035306	9.97778	0.005684
Beclin1	60	72	EETNSGEEPFIET			11	1481.63	Apo	0.05	1485.93	0.086449	3.63901	0.086449	9.97261	0.004217
Beclin1	60	72	EETNSGEEPFIET			11	1481.63	Apo	0.5	1486.1	0.075112	3.80655	0.075112	9.97526	0.005363
Beclin1	60	72	EETNSGEEPFIET			11	1481.63	Apo	5	1486.12	0.056047	3.82966	0.056047	9.99569	0.007692
Beclin1	60	72	EETNSGEEPFIET			11	1481.63	Apo	50	1486.06	0.145975	3.76922	0.145975	9.99497	0.003527
Beclin1	60	72	EETNSGEEPFIET			11	1481.63	Lipids	0	1482.29	0	0	0	9.97696	0
Beclin1	60	72	EETNSGEEPFIET			11	1481.63	Lipids	0.005	1485.63	0.07242	3.33631	0.07242	9.98438	0.008545
Beclin1	60	72	EETNSGEEPFIET			11	1481.63	Lipids	0.05	1486.01	0.05134	3.71404	0.05134	9.98127	0.0059
Beclin1	60	72	EETNSGEEPFIET			11	1481.63	Lipids	0.5	1486.05	0.028083	3.75606	0.028083	9.9871	0.007401
Beclin1	60	72	EETNSGEEPFIET			11	1481.63	Lipids	5	1486.27	0.136758	3.98171	0.136758	9.99879	0.003597
Beclin1	60	72	EETNSGEEPFIET			11	1481.63	Lipids	50	1486.11	0.057233	3.81868	0.057233	9.99757	0.001661
Beclin1	60	79	EETNSGEEPFIETPRQDGVS			17	2220.99	Apo	0	2222.22	0	0	0	9.19559	0
Beclin1	60	79	EETNSGEEPFIETPRQDGVS			17	2220.99	Apo	0.005	2227.68	0.078109	5.45812	0.078109	9.20312	0.01511
Beclin1	60	79	EETNSGEEPFIETPRQDGVS			17	2220.99	Apo	0.05	2228.39	0.079939	6.16992	0.079939	9.20407	0.003603
Beclin1	60	79	EETNSGEEPFIETPRQDGVS			17	2220.99	Apo	0.5	2228.76	0.096736	6.53484	0.096736	9.20854	0.00481
Beclin1	60	79	EETNSGEEPFIETPRQDGVS			17	2220.99	Apo	5	2228.99	0.114875	6.77262	0.114875	9.22835	0.005832
Beclin1	60	79	EETNSGEEPFIETPRQDGVS			17	2220.99	Apo	50	2229.01	0.070617	6.78686	0.070617	9.2349	0.004341
Beclin1	60	79	EETNSGEEPFIETPRQDGVS			17	2220.99	Lipids	0	2222.22	0	0	0	9.19559	0
Beclin1	60	79	EETNSGEEPFIETPRQDGVS			17	2220.99	Lipids	0.005	2227.68	0.060384	5.45456	0.060384	9.21379	0.016436
Beclin1	60	79	EETNSGEEPFIETPRQDGVS			17	2220.99	Lipids	0.05	2228.54	0.083603	6.32296	0.083603	9.21652	0.006253
Beclin1	60	79	EETNSGEEPFIETPRQDGVS			17	2220.99	Lipids	0.5	2228.89	0.132221	6.67309	0.132221	9.22106	0.006275
Beclin1	60	79	EETNSGEEPFIETPRQDGVS			17	2220.99	Lipids	5	2229.17	0.213564	6.94623	0.213564	9.23513	0.004434
Beclin1	60	79	EETNSGEEPFIETPRQDGVS			17	2220.99	Lipids	50	2229.05	0.100464	6.83176	0.100464	9.23669	0.002707
Beclin1	71	89	ETPRQDGVSRRFIPPARMM			15	2244.15	Apo	0	2245.2	0.021348	0	0	6.12938	0.000621
Beclin1	71	89	ETPRQDGVSRRFIPPARMM			15	2244.15	Apo	0.005	2245.77	0.155628	0.566653	0.157086	6.13788	0.0114
Beclin1	71	89	ETPRQDGVSRRFIPPARMM			15	2244.15	Apo	0.05	2246.05	0.113418	0.845988	0.11541	6.14912	0.002353
Beclin1	71	89	ETPRQDGVSRRFIPPARMM			15	2244.15	Apo	0.5	2246.48	0.092662	1.27666	0.09509	6.15053	0.007585
Beclin1	71	89	ETPRQDGVSRRFIPPARMM			15	2244.15	Apo	5	2246.88	0.110039	1.67448	0.11209	6.16571	0.004364
Beclin1	71	89	ETPRQDGVSRRFIPPARMM			15	2244.15	Apo	50	2247.14	0.12995	1.93962	0.131692	6.17251	0.005276
Beclin1	71	89	ETPRQDGVSRRFIPPARMM			15	2244.15	Lipids	0	2245.2	0.021348	0	0	6.12938	0.000621
Beclin1	71	89	ETPRQDGVSRRFIPPARMM			15	2244.15	Lipids	0.005	2245.86	0.162331	0.659383	0.163728	6.15606	0.009118
Beclin1	71	89	ETPRQDGVSRRFIPPARMM			15	2244.15	Lipids	0.05	2246.16	0.103934	0.953651	0.106104	6.16259	0.010482
Beclin1	71	89	ETPRQDGVSRRFIPPARMM			15	2244.15	Lipids	0.5	2246.63	0.112828	1.4246	0.11483	6.18672	0.027844
Beclin1	71	89	ETPRQDGVSRRFIPPARMM			15	2244.15	Lipids	5	2246.98	0.135079	1.77538	0.136755	6.17537	0.005597
Beclin1	71	89	ETPRQDGVSRRFIPPARMM			15	2244.15	Lipids	50	2247.19	0.046198	1.99152	0.050892	6.1802	0.004094
Beclin1	73	79	PRQDGVS			5	758.379	Apo	0	758.69	0.020008	0	0	4.79988	0.00168
Beclin1	73	79	PRQDGVS			5	758.379	Apo	0.005	760.08	0.057872	1.38914	0.061234	4.79296	0.004583
Beclin1	73	79	PRQDGVS			5	758.379	Apo	0.05	760.513	0.061894	1.82295	0.065048	4.79569	0.005683
Beclin1	73	79	PRQDGVS			5	758.379	Apo	0.5	760.757	0.069008	2.06673	0.07185	4.79327	0.004379
Beclin1	73	79	PRQDGVS			5	758.379	Apo	5	760.797	0.139578	2.10687	0.141005	4.80212	0.008916
Beclin1	73	79	PRQDGVS			5	758.379	Apo	50	760.797	0.118988	2.10636	0.120659	4.79949	0.005446
Beclin1	73	79	PRQDGVS			5	758.379	Lipids	0	758.69	0.020008	0	0	4.79988	0.00168
Beclin1	73	79	PRQDGVS			5	758.379	Lipids	0.005	759.941	0.055195	1.25085	0.05871	4.79247	0.005503
Beclin1	73	79	PRQDGVS			5	758.379	Lipids	0.05	760.526	0.07794	1.83609	0.080468	4.79691	0.0056
Beclin1	73	79	PRQDGVS			5	758.379	Lipids	0.5	760.814	0.072742	2.12344	0.075444	4.79996	0.004507
Beclin1	73	79	PRQDGVS			5	758.379	Lipids	5	760.864	0.121434	2.17325	0.123071	4.80086	0.004318
Beclin1	73	79	PRQDGVS			5	758.379	Lipids	50	760.827	0.060031	2.13613	0.063278	4.79984	0.006529
Beclin1	89	96	MSTESANS			7	826.325	Apo	0	826.752	0	0	0	5.17888	0
Beclin1	89	96	MSTESANS			7	826.325	Apo	0.005	829.904	0.052908	3.1515	0.052908	5.16856	0.001353
Beclin1	89	96	MSTESANS			7	826.325	Apo	0.05	829.812	0.042964	3.05991	0.042964	5.17108	0.002856
Beclin1	89	96	MSTESANS			7	826.325	Apo	0.5	829.872	0.02648	3.11939	0.02648	5.17019	0.003904
Beclin1	89	96	MSTESANS			7	826.325	Apo	5	829.859	0.038681	3.10721	0.038681	5.17602	0.003156
Beclin1	89	96	MSTESANS			7	826.325	Apo	50	829.752	0.031978	2.99996	0.031978	5.17897	0.002404
Beclin1	89	96	MSTESANS			7	826.325	Lipids	0	826.752	0	0	0	5.17888	0
Beclin1	89	96	MSTESANS			7	826.325	Lipids	0.005	829.854	0.055379	3.10221	0.055379	5.17261	0.002484
Beclin1	89	96	MSTESANS			7	826.325	Lipids	0.05	829.848	0.026185	3.09587	0.026185	5.17762	0.002828
Beclin1	89	96	MSTESANS			7	826.325	Lipids	0.5	829.854	0.031853	3.1017	0.031853	5.178	0.001996
Beclin1	89	96	MSTESANS			7	826.325	Lipids	5	829.839	0.068149	3.08676	0.068149	5.17703	0.002222
Beclin1	89	96	MSTESANS			7	826.325	Lipids	50	829.793	0.031855	3.04057	0.031855	5.17392	0.000432
Beclin1	89	97	MSTESANSF			8	973.393	Apo	0	973.909	0	0	0	8.67192	0
Beclin1	89	97	MSTESANSF			8	973.393	Apo	0.005	977.327	0.011491	3.41804	0.011491	8.69038	0.014512
Beclin1	89	97	MSTESANSF			8	973.393	Apo	0.05	977.168	0.100706	3.25913	0.100706	8.69146	0.004112
Beclin1	89	97	MSTESANSF			8	973.393	Apo	0.5	977.295	0.08086	3.38636	0.08086	8.69594	0.007256
Beclin1	89	97	MSTESANSF			8	973.393	Apo	5	977.397	0.024083	3.48813	0.024083	8.71674	0.004911
Beclin1	89	97	MSTESANSF			8	973.393	Apo	50	977.324	0.034967	3.41507	0.034967	8.71714	0.001287
Beclin1	89	97	MSTESANSF			8	973.393	Lipids	0	973.909	0	0	0	8.67192	0
Beclin1	89	97	MSTESANSF			8	973.393	Lipids	0.005	977.298	0.156211	3.38904	0.156211	8.70332	0.006094
Beclin1	89	97	MSTESANSF			8	973.393	Lipids	0.05	977.342	0.05635	3.43276	0.05635	8.70539	0.007481
Beclin1	89	97	MSTESANSF			8	973.393	Lipids	0.5	977.45	0.08801	3.54104	0.08801	8.71089	0.007011
Beclin1	89	97	MSTESANSF			8	973.393	Lipids	5	977.39	0.105349	3.48079	0.105349	8.71798	0.004495
Beclin1	89	97	MSTESANSF			8	973.393	Lipids	50	977.279	0.165396	3.37055	0.165396	8.72138	0.002102
Beclin1	97	112	FTLIGEASDGGTMENL			15	1654.76	Apo	0	1655.65	0	0	0	12.3544	0
Beclin1	97	112	FTLIGEASDGGTMENL			15	1654.76	Apo	0.005	1661.33	0.146934	5.67398	0.146934	12.3466	0.009406
Beclin1	97	112	FTLIGEASDGGTMENL			15	1654.76	Apo	0.05	1661.25	0.153222	5.59379	0.153222	12.3373	0.00218
Beclin1	97	112	FTLIGEASDGGTMENL			15	1654.76	Apo	0.5	1661.56	0.158814	5.91207	0.158814	12.3386	0.00738
Beclin1	97	112	FTLIGEASDGGTMENL			15	1654.76	Apo	5	1661.93	0.13081	6.27452	0.13081	12.3608	0.014275
Beclin1	97	112	FTLIGEASDGGTMENL			15	1654.76	Apo	50	1661.79	0.0647	6.134	0.0647	12.3666	0.002453
Beclin1	97	112	FTLIGEASDGGTMENL			15	1654.76	Lipids	0	1655.65	0	0	0	12.3544	0
Beclin1	97	112	FTLIGEASDGGTMENL			15	1654.76	Lipids	0.005	1661.37	0.277017	5.71912	0.277017	12.3468	0.007145
Beclin1	97	112	FTLIGEASDGGTMENL			15	1654.76	Lipids	0.05	1661.37	0.359733	5.71379	0.359733	12.3465	0.007684
Beclin1	97	112	FTLIGEASDGGTMENL			15	1654.76	Lipids	0.5	1661.65	0.144275	5.99812	0.144275	12.3447	0.020342
Beclin1	97	112	FTLIGEASDGGTMENL			15	1654.76	Lipids	5	1661.79	0.20685	6.13883	0.20685	12.3628	0.000275
Beclin1	97	112	FTLIGEASDGGTMENL			15	1654.76	Lipids	50	1661.83	0.07096	6.17567	0.07096	12.3657	0.004671
Beclin1	111	122	NLSRRLKVTGDL			11	1371.81	Apo	0	1372.36	0	0	0	7.79219	0
Beclin1	111	122	NLSRRLKVTGDL			11	1371.81	Apo	0.005	1375.71	0.102164	3.34599	0.102164	7.82699	0.01684
Beclin1	111	122	NLSRRLKVTGDL			11	1371.81	Apo	0.05	1377.05	0.10283	4.69159	0.10283	7.83073	0.002131
Beclin1	111	122	NLSRRLKVTGDL			11	1371.81	Apo	0.5	1377.22	0.102478	4.85486	0.102478	7.84013	0.004333
Beclin1	111	122	NLSRRLKVTGDL			11	1371.81	Apo	5	1377.45	0.043584	5.08341	0.043584	7.87019	0.011637
Beclin1	111	122	NLSRRLKVTGDL			11	1371.81	Apo	50	1377.4	0.182888	5.03747	0.182888	7.88944	0.005663
Beclin1	111	122	NLSRRLKVTGDL			11	1371.81	Lipids	0	1372.36	0	0	0	7.79219	0
Beclin1	111	122	NLSRRLKVTGDL			11	1371.81	Lipids	0.005	1375.67	0.119663	3.30853	0.119663	7.84068	0.008264
Beclin1	111	122	NLSRRLKVTGDL			11	1371.81	Lipids	0.05	1377.03	0.099279	4.67193	0.099279	7.84936	0.011932
Beclin1	111	122	NLSRRLKVTGDL			11	1371.81	Lipids	0.5	1377.37	0.038721	5.0037	0.038721	7.86419	0.002787
Beclin1	111	122	NLSRRLKVTGDL			11	1371.81	Lipids	5	1377.28	0.267723	4.91582	0.267723	7.89039	0.005552
Beclin1	111	122	NLSRRLKVTGDL			11	1371.81	Lipids	50	1377.43	0.006565	5.06567	0.006565	7.91529	0.001258
Beclin1	113	122	SRRLKVTGDL			9	1144.68	Apo	0	1145.42	0.078636	0	0	6.80014	0.004082
Beclin1	113	122	SRRLKVTGDL			9	1144.68	Apo	0.005	1147.29	0.054686	1.87202	0.095782	6.83598	0.013824
Beclin1	113	122	SRRLKVTGDL			9	1144.68	Apo	0.05	1148.34	0.038341	2.91713	0.087485	6.84997	0.003889
Beclin1	113	122	SRRLKVTGDL			9	1144.68	Apo	0.5	1148.78	0.047794	3.3573	0.092021	6.85525	0.006747
Beclin1	113	122	SRRLKVTGDL			9	1144.68	Apo	5	1148.9	0.063974	3.4826	0.101372	6.88104	0.011383
Beclin1	113	122	SRRLKVTGDL			9	1144.68	Apo	50	1148.82	0.093581	3.39763	0.122233	6.90179	0.005375
Beclin1	113	122	SRRLKVTGDL			9	1144.68	Lipids	0	1145.42	0.078636	0	0	6.80014	0.004082
Beclin1	113	122	SRRLKVTGDL			9	1144.68	Lipids	0.005	1147.21	0.059363	1.78804	0.098527	6.86112	0.010909
Beclin1	113	122	SRRLKVTGDL			9	1144.68	Lipids	0.05	1148.43	0.061695	3.00927	0.099949	6.87452	0.014288
Beclin1	113	122	SRRLKVTGDL			9	1144.68	Lipids	0.5	1148.81	0.066051	3.39251	0.102695	6.87667	0.00682
Beclin1	113	122	SRRLKVTGDL			9	1144.68	Lipids	5	1148.86	0.095323	3.43694	0.123572	6.89868	0.006504
Beclin1	113	122	SRRLKVTGDL			9	1144.68	Lipids	50	1148.91	0.083278	3.49202	0.114538	6.92013	0.008545
Beclin1	123	137	FDIMSGQTDVDHPLC			13	1677.72	Apo	0	1678.72	0	0	0	11.1139	0
Beclin1	123	137	FDIMSGQTDVDHPLC			13	1677.72	Apo	0.005	1679.42	0.074452	0.698823	0.074452	11.1229	0.010949
Beclin1	123	137	FDIMSGQTDVDHPLC			13	1677.72	Apo	0.05	1679.66	0.046959	0.941022	0.046959	11.1199	0.003709
Beclin1	123	137	FDIMSGQTDVDHPLC			13	1677.72	Apo	0.5	1679.82	0.043353	1.10708	0.043353	11.1221	0.006674
Beclin1	123	137	FDIMSGQTDVDHPLC			13	1677.72	Apo	5	1680.61	0.022368	1.88828	0.022368	11.1525	0.010056
Beclin1	123	137	FDIMSGQTDVDHPLC			13	1677.72	Apo	50	1681.54	0.125196	2.82512	0.125196	11.1606	0.006005
Beclin1	123	137	FDIMSGQTDVDHPLC			13	1677.72	Lipids	0	1678.72	0	0	0	11.1139	0
Beclin1	123	137	FDIMSGQTDVDHPLC			13	1677.72	Lipids	0.005	1679.45	0.089004	0.729423	0.089004	11.1269	0.007112
Beclin1	123	137	FDIMSGQTDVDHPLC			13	1677.72	Lipids	0.05	1679.66	0.023212	0.945368	0.023212	11.1304	0.008914
Beclin1	123	137	FDIMSGQTDVDHPLC			13	1677.72	Lipids	0.5	1679.82	0.037808	1.1041	0.037808	11.1392	0.006469
Beclin1	123	137	FDIMSGQTDVDHPLC			13	1677.72	Lipids	5	1680.49	0.103504	1.76905	0.103504	11.1512	0.004493
Beclin1	123	137	FDIMSGQTDVDHPLC			13	1677.72	Lipids	50	1681.7	0.223436	2.98645	0.223436	11.1627	0.002715
Beclin1	123	139	FDIMSGQTDVDHPLCEE			15	1935.81	Apo	0	1936.83	0.032333	0	0	10.9461	0.00091
Beclin1	123	139	FDIMSGQTDVDHPLCEE			15	1935.81	Apo	0.005	1937.75	0.064539	0.916742	0.072185	10.9527	0.008729
Beclin1	123	139	FDIMSGQTDVDHPLCEE			15	1935.81	Apo	0.05	1937.99	0.034697	1.16143	0.047427	10.9489	0.003285
Beclin1	123	139	FDIMSGQTDVDHPLCEE			15	1935.81	Apo	0.5	1938.34	0.108004	1.51262	0.11274	10.9517	0.008145
Beclin1	123	139	FDIMSGQTDVDHPLCEE			15	1935.81	Apo	5	1939.25	0.075004	2.42582	0.081677	10.9825	0.009275
Beclin1	123	139	FDIMSGQTDVDHPLCEE			15	1935.81	Apo	50	1940.6	0.08401	3.77194	0.090017	10.9908	0.005143
Beclin1	123	139	FDIMSGQTDVDHPLCEE			15	1935.81	Lipids	0	1936.83	0.032333	0	0	10.9461	0.00091
Beclin1	123	139	FDIMSGQTDVDHPLCEE			15	1935.81	Lipids	0.005	1937.78	0.081295	0.953443	0.087489	10.962	0.002061
Beclin1	123	139	FDIMSGQTDVDHPLCEE			15	1935.81	Lipids	0.05	1937.99	0.103965	1.15731	0.108877	10.9603	0.007285
Beclin1	123	139	FDIMSGQTDVDHPLCEE			15	1935.81	Lipids	0.5	1938.46	0.067034	1.63411	0.074424	10.9688	0.005452
Beclin1	123	139	FDIMSGQTDVDHPLCEE			15	1935.81	Lipids	5	1939.23	0.080103	2.39851	0.086382	10.9845	0.002328
Beclin1	123	139	FDIMSGQTDVDHPLCEE			15	1935.81	Lipids	50	1940.6	0.114487	3.76668	0.118965	10.9911	0.003149
Beclin1	125	131	IMSGQTD			6	751.329	Apo	0	751.763	0	0	0	11.7725	0
Beclin1	125	131	IMSGQTD			6	751.329	Apo	0.005	751.826	0.031206	0.063756	0.031206	11.7861	0.006169
Beclin1	125	131	IMSGQTD			6	751.329	Apo	0.05	751.867	0.036413	0.103996	0.036413	11.7789	0.001703
Beclin1	125	131	IMSGQTD			6	751.329	Apo	0.5	751.864	0.019003	0.101497	0.019003	11.7821	0.003562
Beclin1	125	131	IMSGQTD			6	751.329	Apo	5	751.875	0.013774	0.112776	0.013774	11.803	0.01027
Beclin1	125	131	IMSGQTD			6	751.329	Apo	50	751.953	0.018998	0.190826	0.018998	11.8093	0.002616
Beclin1	125	131	IMSGQTD			6	751.329	Lipids	0	751.763	0	0	0	11.7725	0
Beclin1	125	131	IMSGQTD			6	751.329	Lipids	0.005	751.848	0.012889	0.085613	0.012889	11.7908	0.007342
Beclin1	125	131	IMSGQTD			6	751.329	Lipids	0.05	751.864	0.028245	0.10186	0.028245	11.7911	0.007068
Beclin1	125	131	IMSGQTD			6	751.329	Lipids	0.5	751.878	0.015356	0.115045	0.015356	11.7936	0.007409
Beclin1	125	131	IMSGQTD			6	751.329	Lipids	5	751.912	0.017726	0.149136	0.017726	11.8083	0.003662
Beclin1	125	131	IMSGQTD			6	751.329	Lipids	50	751.945	0.018303	0.182511	0.018303	11.8117	0.002416
Beclin1	139	145	ECTDTLL			6	794.36	Apo	0	794.672	0	0	0	10.4864	0
Beclin1	139	145	ECTDTLL			6	794.36	Apo	0.005	794.856	0.033938	0.183291	0.033938	10.5196	0.004875
Beclin1	139	145	ECTDTLL			6	794.36	Apo	0.05	794.909	0.014471	0.236184	0.014471	10.5113	0.004424
Beclin1	139	145	ECTDTLL			6	794.36	Apo	0.5	795	0.014861	0.327898	0.014861	10.5157	0.000799
Beclin1	139	145	ECTDTLL			6	794.36	Apo	5	795.357	0.016868	0.684137	0.016868	10.5345	0.006427
Beclin1	139	145	ECTDTLL			6	794.36	Apo	50	795.512	0.013947	0.839237	0.013947	10.5425	0.001785
Beclin1	139	145	ECTDTLL			6	794.36	Lipids	0	794.672	0	0	0	10.4864	0
Beclin1	139	145	ECTDTLL			6	794.36	Lipids	0.005	794.909	0.049816	0.236416	0.049816	10.5249	0.007146
Beclin1	139	145	ECTDTLL			6	794.36	Lipids	0.05	794.951	0.027872	0.278775	0.027872	10.5293	0.004934
Beclin1	139	145	ECTDTLL			6	794.36	Lipids	0.5	795.006	0.020595	0.333834	0.020595	10.5289	0.00381
Beclin1	139	145	ECTDTLL			6	794.36	Lipids	5	795.346	0.022135	0.673716	0.022135	10.5449	0.002996
Beclin1	139	145	ECTDTLL			6	794.36	Lipids	50	795.514	0.030805	0.841466	0.030805	10.5485	0.001763
Beclin1	152	161	LNVTENECQN			9	1163.5	Apo	0	1163.99	0	0	0	10.2029	0
Beclin1	152	161	LNVTENECQN			9	1163.5	Apo	0.005	1164.63	0.019578	0.640929	0.019578	10.2541	0.011886
Beclin1	152	161	LNVTENECQN			9	1163.5	Apo	0.05	1164.68	0.031895	0.688671	0.031895	10.2354	0.001448
Beclin1	152	161	LNVTENECQN			9	1163.5	Apo	0.5	1164.82	0.053014	0.829234	0.053014	10.2491	0.010722
Beclin1	152	161	LNVTENECQN			9	1163.5	Apo	5	1165.15	0.102518	1.15975	0.102518	10.2929	0.012098
Beclin1	152	161	LNVTENECQN			9	1163.5	Apo	50	1165.29	0.034582	1.30003	0.034582	10.3178	0.007741
Beclin1	152	161	LNVTENECQN			9	1163.5	Lipids	0	1163.99	0	0	0	10.2029	0
Beclin1	152	161	LNVTENECQN			9	1163.5	Lipids	0.005	1164.59	0.041214	0.603808	0.041214	10.2526	0.012354
Beclin1	152	161	LNVTENECQN			9	1163.5	Lipids	0.05	1164.78	0.020477	0.791403	0.020477	10.2612	0.007723
Beclin1	152	161	LNVTENECQN			9	1163.5	Lipids	0.5	1164.85	0.064168	0.857407	0.064168	10.2728	0.001401
Beclin1	152	161	LNVTENECQN			9	1163.5	Lipids	5	1165.08	0.070643	1.08801	0.070643	10.3084	0.004007
Beclin1	152	161	LNVTENECQN			9	1163.5	Lipids	50	1165.23	0.024019	1.23626	0.024019	10.3348	0.006838
Beclin1	153	161	NVTENECQN			8	1050.42	Apo	0	1050.78	0	0	0	5.76852	0
Beclin1	153	161	NVTENECQN			8	1050.42	Apo	0.005	1051.02	0.052446	0.242177	0.052446	5.77097	0.002499
Beclin1	153	161	NVTENECQN			8	1050.42	Apo	0.05	1051.24	0.019928	0.459475	0.019928	5.76893	0.001602
Beclin1	153	161	NVTENECQN			8	1050.42	Apo	0.5	1051.84	0.048263	1.05309	0.048263	5.76597	0.00422
Beclin1	153	161	NVTENECQN			8	1050.42	Apo	5	1053.2	0.101742	2.41553	0.101742	5.77239	0.005852
Beclin1	153	161	NVTENECQN			8	1050.42	Apo	50	1053.99	0.051746	3.20653	0.051746	5.77169	0.001473
Beclin1	153	161	NVTENECQN			8	1050.42	Lipids	0	1050.78	0	0	0	5.76852	0
Beclin1	153	161	NVTENECQN			8	1050.42	Lipids	0.005	1051.03	0.060598	0.245137	0.060598	5.77168	0.001826
Beclin1	153	161	NVTENECQN			8	1050.42	Lipids	0.05	1051.24	0.0285	0.45367	0.0285	5.77781	0.003218
Beclin1	153	161	NVTENECQN			8	1050.42	Lipids	0.5	1051.71	0.038461	0.930312	0.038461	5.77857	0.00452
Beclin1	153	161	NVTENECQN			8	1050.42	Lipids	5	1052.92	0.090152	2.13724	0.090152	5.77893	0.003329
Beclin1	153	161	NVTENECQN			8	1050.42	Lipids	50	1053.93	0.106064	3.15139	0.106064	5.77314	0.001233
Beclin1	159	165	CQNYKRC			6	914.397	Apo	0	915.017	0	0	0	11.0304	0
Beclin1	159	165	CQNYKRC			6	914.397	Apo	0.005	917.208	0.032105	2.19111	0.032105	11.045	0.008333
Beclin1	159	165	CQNYKRC			6	914.397	Apo	0.05	917.219	0.021112	2.20248	0.021112	11.0352	0.002436
Beclin1	159	165	CQNYKRC			6	914.397	Apo	0.5	917.29	0.052507	2.27376	0.052507	11.0393	0.004379
Beclin1	159	165	CQNYKRC			6	914.397	Apo	5	917.329	0.013231	2.31257	0.013231	11.0622	0.005694
Beclin1	159	165	CQNYKRC			6	914.397	Apo	50	917.271	0.059642	2.254	0.059642	11.0691	0.001285
Beclin1	159	165	CQNYKRC			6	914.397	Lipids	0	915.017	0	0	0	11.0304	0
Beclin1	159	165	CQNYKRC			6	914.397	Lipids	0.005	917.182	0.043689	2.16497	0.043689	11.0445	0.007157
Beclin1	159	165	CQNYKRC			6	914.397	Lipids	0.05	917.307	0.023739	2.29087	0.023739	11.0464	0.00691
Beclin1	159	165	CQNYKRC			6	914.397	Lipids	0.5	917.299	0.082978	2.28277	0.082978	11.048	0.005221
Beclin1	159	165	CQNYKRC			6	914.397	Lipids	5	917.345	0.11481	2.3286	0.11481	11.0653	0.002035
Beclin1	159	165	CQNYKRC			6	914.397	Lipids	50	917.369	0.052326	2.35273	0.052326	11.0682	0.003496
Beclin1	166	178	LEILEQMNEDDSE			12	1564.67	Apo	0	1565.51	0.010566	0	0	11.0654	0.00062
Beclin1	166	178	LEILEQMNEDDSE			12	1564.67	Apo	0.005	1565.99	0.121272	0.484263	0.121732	11.0728	0.008113
Beclin1	166	178	LEILEQMNEDDSE			12	1564.67	Apo	0.05	1566.25	0.109918	0.744822	0.110424	11.0801	0.007335
Beclin1	166	178	LEILEQMNEDDSE			12	1564.67	Apo	0.5	1566.44	0.179329	0.931485	0.17964	11.0892	0.015034
Beclin1	166	178	LEILEQMNEDDSE			12	1564.67	Apo	5	1566.91	0.103545	1.40278	0.104083	11.1236	0.015405
Beclin1	166	178	LEILEQMNEDDSE			12	1564.67	Apo	50	1567.91	0.08304	2.40069	0.08371	11.1485	0.007145
Beclin1	166	178	LEILEQMNEDDSE			12	1564.67	Lipids	0	1565.51	0.010566	0	0	11.0654	0.00062
Beclin1	166	178	LEILEQMNEDDSE			12	1564.67	Lipids	0.005	1566	0.146355	0.490741	0.146736	11.0847	0.010209
Beclin1	166	178	LEILEQMNEDDSE			12	1564.67	Lipids	0.05	1566.37	0.092497	0.860751	0.093098	11.0991	0.012168
Beclin1	166	178	LEILEQMNEDDSE			12	1564.67	Lipids	0.5	1566.56	0.107991	1.05869	0.108507	11.1063	0.001477
Beclin1	166	178	LEILEQMNEDDSE			12	1564.67	Lipids	5	1566.99	0.130961	1.48457	0.131386	11.1359	0.003595
Beclin1	166	178	LEILEQMNEDDSE			12	1564.67	Lipids	50	1567.92	0.118072	2.41115	0.118544	11.1607	0.007275
Beclin1	166	179	LEILEQMNEDDSEQ			13	1692.73	Apo	0	1693.74	0	0	0	12.363	0
Beclin1	166	179	LEILEQMNEDDSEQ			13	1692.73	Apo	0.005	1699.93	0.26709	6.1978	0.26709	12.3484	0.006219
Beclin1	166	179	LEILEQMNEDDSEQ			13	1692.73	Apo	0.05	1700.01	0.180889	6.27128	0.180889	12.3409	0.003468
Beclin1	166	179	LEILEQMNEDDSEQ			13	1692.73	Apo	0.5	1700.15	0.096071	6.41509	0.096071	12.3414	0.009357
Beclin1	166	179	LEILEQMNEDDSEQ			13	1692.73	Apo	5	1700.31	0.171351	6.57046	0.171351	12.3712	0.010402
Beclin1	166	179	LEILEQMNEDDSEQ			13	1692.73	Apo	50	1700.3	0.134226	6.55946	0.134226	12.3747	0.001698
Beclin1	166	179	LEILEQMNEDDSEQ			13	1692.73	Lipids	0	1693.74	0	0	0	12.363	0
Beclin1	166	179	LEILEQMNEDDSEQ			13	1692.73	Lipids	0.005	1699.67	0.199219	5.93118	0.199219	12.3469	0.008307
Beclin1	166	179	LEILEQMNEDDSEQ			13	1692.73	Lipids	0.05	1700.05	0.132075	6.31014	0.132075	12.3467	0.00886
Beclin1	166	179	LEILEQMNEDDSEQ			13	1692.73	Lipids	0.5	1700.45	0.33842	6.71543	0.33842	12.3529	0.014615
Beclin1	166	179	LEILEQMNEDDSEQ			13	1692.73	Lipids	5	1700.4	0.141443	6.66289	0.141443	12.3627	0.005682
Beclin1	166	179	LEILEQMNEDDSEQ			13	1692.73	Lipids	50	1700.44	0.191295	6.69919	0.191295	12.3692	0.004184
Beclin1	196	212	QELEDVEKNRKIVAENL			16	2027.08	Apo	0	2028.21	0.003189	0	0	5.48365	0.009832
Beclin1	196	212	QELEDVEKNRKIVAENL			16	2027.08	Apo	0.005	2029.56	0.086188	1.34904	0.086247	5.48783	0.01063
Beclin1	196	212	QELEDVEKNRKIVAENL			16	2027.08	Apo	0.05	2029.8	0.175796	1.58228	0.175825	5.50144	0.005851
Beclin1	196	212	QELEDVEKNRKIVAENL			16	2027.08	Apo	0.5	2030	0.056195	1.78893	0.056285	5.50343	0.008754
Beclin1	196	212	QELEDVEKNRKIVAENL			16	2027.08	Apo	5	2030.12	0.054393	1.9088	0.054487	5.51719	0.00717
Beclin1	196	212	QELEDVEKNRKIVAENL			16	2027.08	Apo	50	2030.17	0.135421	1.95594	0.135459	5.55295	0.00409
Beclin1	196	212	QELEDVEKNRKIVAENL			16	2027.08	Lipids	0	2028.21	0.003189	0	0	5.48365	0.009832
Beclin1	196	212	QELEDVEKNRKIVAENL			16	2027.08	Lipids	0.005	2029.65	0.123075	1.4401	0.123116	5.50317	0.01501
Beclin1	196	212	QELEDVEKNRKIVAENL			16	2027.08	Lipids	0.05	2029.98	0.114732	1.76374	0.114776	5.52074	0.01105
Beclin1	196	212	QELEDVEKNRKIVAENL			16	2027.08	Lipids	0.5	2030.06	0.117064	1.84754	0.117108	5.52947	0.004792
Beclin1	196	212	QELEDVEKNRKIVAENL			16	2027.08	Lipids	5	2030.16	0.049877	1.94141	0.049979	5.55423	0.011252
Beclin1	196	212	QELEDVEKNRKIVAENL			16	2027.08	Lipids	50	2030.1	0.08265	1.88491	0.082712	5.58655	0.013246
Beclin1	227	236	AQYQREYSEF			9	1320.59	Apo	0	1321.96	0	0	0	10.6951	0
Beclin1	227	236	AQYQREYSEF			9	1320.59	Apo	0.005	1323.5	0.044761	1.5428	0.044761	10.7306	0.008921
Beclin1	227	236	AQYQREYSEF			9	1320.59	Apo	0.05	1323.74	0.0345	1.7863	0.0345	10.7171	0.006009
Beclin1	227	236	AQYQREYSEF			9	1320.59	Apo	0.5	1323.93	0.053067	1.97871	0.053067	10.7232	0.006572
Beclin1	227	236	AQYQREYSEF			9	1320.59	Apo	5	1324.47	0.113648	2.51108	0.113648	10.7573	0.011338
Beclin1	227	236	AQYQREYSEF			9	1320.59	Apo	50	1325.03	0.05781	3.07185	0.05781	10.7698	0.004227
Beclin1	227	236	AQYQREYSEF			9	1320.59	Lipids	0	1321.96	0	0	0	10.6951	0
Beclin1	227	236	AQYQREYSEF			9	1320.59	Lipids	0.005	1323.47	0.081371	1.51471	0.081371	10.7324	0.012688
Beclin1	227	236	AQYQREYSEF			9	1320.59	Lipids	0.05	1323.71	0.059509	1.75571	0.059509	10.7375	0.006488
Beclin1	227	236	AQYQREYSEF			9	1320.59	Lipids	0.5	1323.93	0.01139	1.97786	0.01139	10.7474	0.007645
Beclin1	227	236	AQYQREYSEF			9	1320.59	Lipids	5	1324.35	0.082034	2.39402	0.082034	10.7666	0.007289
Beclin1	227	236	AQYQREYSEF			9	1320.59	Lipids	50	1324.99	0.075829	3.03394	0.075829	10.775	0.002326
Beclin1	231	238	REYSEFKR			7	1114.56	Apo	0	1115.18	0.020877	0	0	5.79565	0.003335
Beclin1	231	238	REYSEFKR			7	1114.56	Apo	0.005	1115.77	0.041735	0.58297	0.046666	5.81855	0.007631
Beclin1	231	238	REYSEFKR			7	1114.56	Apo	0.05	1116.08	0.064269	0.896854	0.067575	5.81722	0.003251
Beclin1	231	238	REYSEFKR			7	1114.56	Apo	0.5	1116.24	0.078996	1.05737	0.081708	5.8161	0.005196
Beclin1	231	238	REYSEFKR			7	1114.56	Apo	5	1116.65	0.087733	1.46569	0.090183	5.83535	0.011755
Beclin1	231	238	REYSEFKR			7	1114.56	Apo	50	1116.95	0.039048	1.76717	0.044279	5.8424	0.003171
Beclin1	231	238	REYSEFKR			7	1114.56	Lipids	0	1115.18	0.020877	0	0	5.79565	0.003335
Beclin1	231	238	REYSEFKR			7	1114.56	Lipids	0.005	1115.72	0.103766	0.539385	0.105846	5.8185	0.01081
Beclin1	231	238	REYSEFKR			7	1114.56	Lipids	0.05	1116.12	0.064734	0.930991	0.068017	5.82737	0.006289
Beclin1	231	238	REYSEFKR			7	1114.56	Lipids	0.5	1116.25	0.076005	1.06274	0.07882	5.83315	0.007627
Beclin1	231	238	REYSEFKR			7	1114.56	Lipids	5	1116.59	0.115922	1.40443	0.117787	5.84209	0.004418
Beclin1	231	238	REYSEFKR			7	1114.56	Lipids	50	1116.88	0.063992	1.69538	0.067311	5.85193	0.005778
Beclin1	244	261	DDELKSVENQMRYAQTQL			17	2168.03	Apo	0	2169.24	0.001264	0	0	11.3039	0.003699
Beclin1	244	261	DDELKSVENQMRYAQTQL			17	2168.03	Apo	0.005	2169.45	0.026108	0.207212	0.026139	11.3134	0.00977
Beclin1	244	261	DDELKSVENQMRYAQTQL			17	2168.03	Apo	0.05	2169.49	0.049767	0.248136	0.049783	11.308	0.004446
Beclin1	244	261	DDELKSVENQMRYAQTQL			17	2168.03	Apo	0.5	2169.51	0.009864	0.264407	0.009945	11.3128	0.008447
Beclin1	244	261	DDELKSVENQMRYAQTQL			17	2168.03	Apo	5	2169.76	0.05621	0.520442	0.056224	11.3397	0.008462
Beclin1	244	261	DDELKSVENQMRYAQTQL			17	2168.03	Apo	50	2170.79	0.186399	1.54554	0.186403	11.3436	0.003779
Beclin1	244	261	DDELKSVENQMRYAQTQL			17	2168.03	Lipids	0	2169.24	0.001264	0	0	11.3039	0.003699
Beclin1	244	261	DDELKSVENQMRYAQTQL			17	2168.03	Lipids	0.005	2169.46	0.072393	0.218601	0.072404	11.3124	0.007306
Beclin1	244	261	DDELKSVENQMRYAQTQL			17	2168.03	Lipids	0.05	2169.45	0.04433	0.204079	0.044348	11.3189	0.006353
Beclin1	244	261	DDELKSVENQMRYAQTQL			17	2168.03	Lipids	0.5	2169.54	0.062438	0.292489	0.062451	11.3257	0.002572
Beclin1	244	261	DDELKSVENQMRYAQTQL			17	2168.03	Lipids	5	2169.72	0.061554	0.474269	0.061567	11.3407	0.003798
Beclin1	244	261	DDELKSVENQMRYAQTQL			17	2168.03	Lipids	50	2170.63	0.094614	1.38578	0.094622	11.3444	0.003591
Beclin1	262	270	DKLKKTNVF			8	1092.64	Apo	0	1093.12	0	0	0	6.96076	0
Beclin1	262	270	DKLKKTNVF			8	1092.64	Apo	0.005	1094.27	0.045386	1.1454	0.045386	6.99617	0.017169
Beclin1	262	270	DKLKKTNVF			8	1092.64	Apo	0.05	1094.31	0.201156	1.18656	0.201156	7.00436	0.003944
Beclin1	262	270	DKLKKTNVF			8	1092.64	Apo	0.5	1094.8	0.066471	1.68031	0.066471	7.01132	0.005181
Beclin1	262	270	DKLKKTNVF			8	1092.64	Apo	5	1095.24	0.062311	2.1123	0.062311	7.04283	0.008149
Beclin1	262	270	DKLKKTNVF			8	1092.64	Apo	50	1095.3	0.05457	2.17532	0.05457	7.0588	0.002437
Beclin1	262	270	DKLKKTNVF			8	1092.64	Lipids	0	1093.12	0	0	0	6.96076	0
Beclin1	262	270	DKLKKTNVF			8	1092.64	Lipids	0.005	1093.96	0.123388	0.835224	0.123388	7.02159	0.006236
Beclin1	262	270	DKLKKTNVF			8	1092.64	Lipids	0.05	1094.37	0.087063	1.2455	0.087063	7.03233	0.006954
Beclin1	262	270	DKLKKTNVF			8	1092.64	Lipids	0.5	1094.58	0.233331	1.45807	0.233331	7.04035	0.008275
Beclin1	262	270	DKLKKTNVF			8	1092.64	Lipids	5	1094.63	0.211534	1.50413	0.211534	7.05907	0.003572
Beclin1	262	270	DKLKKTNVF			8	1092.64	Lipids	50	1094.87	0.065809	1.74367	0.065809	7.07412	0.003262
Beclin1	275	287	HIWHSGQFGTINN			12	1510.72	Apo	0	1511.42	2.27374e-13	0	0	8.52351	0
Beclin1	275	287	HIWHSGQFGTINN			12	1510.72	Apo	0.005	1512.12	0.123246	0.697935	0.123246	8.54834	0.016781
Beclin1	275	287	HIWHSGQFGTINN			12	1510.72	Apo	0.05	1512.29	0.127532	0.869861	0.127532	8.55529	0.00494
Beclin1	275	287	HIWHSGQFGTINN			12	1510.72	Apo	0.5	1512.72	0.091546	1.29518	0.091546	8.56629	0.009384
Beclin1	275	287	HIWHSGQFGTINN			12	1510.72	Apo	5	1513.18	0.064333	1.76206	0.064333	8.59727	0.006136
Beclin1	275	287	HIWHSGQFGTINN			12	1510.72	Apo	50	1513.36	0.052228	1.94044	0.052228	8.61184	0.005403
Beclin1	275	287	HIWHSGQFGTINN			12	1510.72	Lipids	0	1511.42	2.27374e-13	0	0	8.52351	0
Beclin1	275	287	HIWHSGQFGTINN			12	1510.72	Lipids	0.005	1512.24	0.050778	0.814052	0.050778	8.5736	0.010236
Beclin1	275	287	HIWHSGQFGTINN			12	1510.72	Lipids	0.05	1512.52	0.016308	1.10187	0.016308	8.58364	0.010704
Beclin1	275	287	HIWHSGQFGTINN			12	1510.72	Lipids	0.5	1512.71	0.086672	1.28494	0.086672	8.59183	0.007845
Beclin1	275	287	HIWHSGQFGTINN			12	1510.72	Lipids	5	1512.95	0.096682	1.52666	0.096682	8.61343	0.002833
Beclin1	275	287	HIWHSGQFGTINN			12	1510.72	Lipids	50	1513.24	0.186944	1.81511	0.186944	8.62701	0.005933
Beclin1	281	294	QFGTINNFRLGRLP			12	1632.9	Apo	0	1633.69	2.27374e-13	0	0	4.95028	0
Beclin1	281	294	QFGTINNFRLGRLP			12	1632.9	Apo	0.005	1636.88	0.066415	3.18376	0.066415	4.95066	0.002612
Beclin1	281	294	QFGTINNFRLGRLP			12	1632.9	Apo	0.05	1637.19	0.030376	3.50209	0.030376	4.95742	0.001373
Beclin1	281	294	QFGTINNFRLGRLP			12	1632.9	Apo	0.5	1637.42	0.084551	3.72749	0.084551	4.95295	0.00589
Beclin1	281	294	QFGTINNFRLGRLP			12	1632.9	Apo	5	1637.27	0.218149	3.57227	0.218149	4.96955	0.002594
Beclin1	281	294	QFGTINNFRLGRLP			12	1632.9	Apo	50	1637.24	0.164838	3.54545	0.164838	4.97136	0.003462
Beclin1	281	294	QFGTINNFRLGRLP			12	1632.9	Lipids	0	1633.69	2.27374e-13	0	0	4.95028	0
Beclin1	281	294	QFGTINNFRLGRLP			12	1632.9	Lipids	0.005	1637.04	0.111575	3.34491	0.111575	4.95237	0.006739
Beclin1	281	294	QFGTINNFRLGRLP			12	1632.9	Lipids	0.05	1637.16	0.27192	3.47035	0.27192	4.95757	0.010811
Beclin1	281	294	QFGTINNFRLGRLP			12	1632.9	Lipids	0.5	1637.52	0.196253	3.8301	0.196253	4.96961	0.006355
Beclin1	281	294	QFGTINNFRLGRLP			12	1632.9	Lipids	5	1637.5	0.046338	3.8059	0.046338	4.97583	0.005468
Beclin1	281	294	QFGTINNFRLGRLP			12	1632.9	Lipids	50	1637.36	0.168159	3.66313	0.168159	4.9832	0.00412
Beclin1	288	300	FRLGRLPSVPVEW			10	1555.87	Apo	0	1556.89	0.083543	0	0	11.9407	0.00387
Beclin1	288	300	FRLGRLPSVPVEW			10	1555.87	Apo	0.005	1557.96	0.034943	1.07322	0.090556	11.9563	0.016166
Beclin1	288	300	FRLGRLPSVPVEW			10	1555.87	Apo	0.05	1557.92	0.17036	1.02609	0.189742	11.9647	0.004137
Beclin1	288	300	FRLGRLPSVPVEW			10	1555.87	Apo	0.5	1558.37	0.051275	1.47549	0.098024	11.9767	0.009684
Beclin1	288	300	FRLGRLPSVPVEW			10	1555.87	Apo	5	1559.33	0.163237	2.44363	0.183374	12.0372	0.025511
Beclin1	288	300	FRLGRLPSVPVEW			10	1555.87	Apo	50	1559.1	0.040603	2.20708	0.092887	12.0932	0.027381
Beclin1	288	300	FRLGRLPSVPVEW			10	1555.87	Lipids	0	1556.89	0.083543	0	0	11.9407	0.00387
Beclin1	288	300	FRLGRLPSVPVEW			10	1555.87	Lipids	0.005	1557.69	0.113242	0.794123	0.140724	11.9646	0.016819
Beclin1	288	300	FRLGRLPSVPVEW			10	1555.87	Lipids	0.05	1557.8	0.050293	0.912842	0.097513	11.9819	0.013338
Beclin1	288	300	FRLGRLPSVPVEW			10	1555.87	Lipids	0.5	1557.91	0.280219	1.02343	0.292408	12.003	0.015648
Beclin1	288	300	FRLGRLPSVPVEW			10	1555.87	Lipids	5	1558.22	0.321665	1.33251	0.332337	12.0528	0.010268
Beclin1	288	300	FRLGRLPSVPVEW			10	1555.87	Lipids	50	1558.49	0.251847	1.59526	0.265342	12.112	0.024753
Beclin1	290	302	LGRLPSVPVEWNE			10	1495.79	Apo	0	1496.67	0	0	0	6.80212	0
Beclin1	290	302	LGRLPSVPVEWNE			10	1495.79	Apo	0.005	1501.33	0.111711	4.66741	0.111711	6.82259	0.01253
Beclin1	290	302	LGRLPSVPVEWNE			10	1495.79	Apo	0.05	1501.39	0.007345	4.72567	0.007345	6.82578	0.002139
Beclin1	290	302	LGRLPSVPVEWNE			10	1495.79	Apo	0.5	1501.57	0.036022	4.90357	0.036022	6.83052	0.002648
Beclin1	290	302	LGRLPSVPVEWNE			10	1495.79	Apo	5	1501.73	0.241091	5.06196	0.241091	6.85019	0.013234
Beclin1	290	302	LGRLPSVPVEWNE			10	1495.79	Apo	50	1501.72	0.240133	5.05819	0.240133	6.85315	0.004804
Beclin1	290	302	LGRLPSVPVEWNE			10	1495.79	Lipids	0	1496.67	0	0	0	6.80212	0
Beclin1	290	302	LGRLPSVPVEWNE			10	1495.79	Lipids	0.005	1501.23	0.173348	4.56843	0.173348	6.83693	0.002036
Beclin1	290	302	LGRLPSVPVEWNE			10	1495.79	Lipids	0.05	1501.61	0.187142	4.94098	0.187142	6.8437	0.01523
Beclin1	290	302	LGRLPSVPVEWNE			10	1495.79	Lipids	0.5	1501.6	0.162591	4.92928	0.162591	6.84669	0.004723
Beclin1	290	302	LGRLPSVPVEWNE			10	1495.79	Lipids	5	1501.75	0.15757	5.08326	0.15757	6.85404	0.004327
Beclin1	290	302	LGRLPSVPVEWNE			10	1495.79	Lipids	50	1501.62	0.191777	4.95055	0.191777	6.85735	0.003492
Beclin1	306	312	AWGQTVL			6	774.414	Apo	0	774.816	0.010776	0	0	11.2698	0.00128
Beclin1	306	312	AWGQTVL			6	774.414	Apo	0.005	774.782	0.055916	-0.034088	0.056945	11.2891	0.006931
Beclin1	306	312	AWGQTVL			6	774.414	Apo	0.05	774.888	0.009563	0.071823	0.014408	11.2824	0.003646
Beclin1	306	312	AWGQTVL			6	774.414	Apo	0.5	774.89	0.024434	0.073975	0.026705	11.2952	0.005289
Beclin1	306	312	AWGQTVL			6	774.414	Apo	5	774.916	0.006035	0.100379	0.012351	11.3156	0.014696
Beclin1	306	312	AWGQTVL			6	774.414	Apo	50	774.88	0.012493	0.063767	0.016498	11.3251	0.002241
Beclin1	306	312	AWGQTVL			6	774.414	Lipids	0	774.816	0.010776	0	0	11.2698	0.00128
Beclin1	306	312	AWGQTVL			6	774.414	Lipids	0.005	774.807	0.022611	-0.009168	0.025047	11.2917	0.010378
Beclin1	306	312	AWGQTVL			6	774.414	Lipids	0.05	774.84	0.01659	0.024024	0.019783	11.3015	0.006949
Beclin1	306	312	AWGQTVL			6	774.414	Lipids	0.5	774.845	0.016315	0.02891	0.019553	11.3083	0.004824
Beclin1	306	312	AWGQTVL			6	774.414	Lipids	5	774.848	0.075986	0.031845	0.076746	11.3215	0.00311
Beclin1	306	312	AWGQTVL			6	774.414	Lipids	50	774.814	0.054517	-0.001654	0.055572	11.3283	0.002681
Beclin1	326	339	QRYRLVPYGNHSYL			12	1765.91	Apo	0	1766.94	0.011238	0	0	9.23353	0.000607
Beclin1	326	339	QRYRLVPYGNHSYL			12	1765.91	Apo	0.005	1767.18	0.015051	0.245017	0.018783	9.26897	0.021653
Beclin1	326	339	QRYRLVPYGNHSYL			12	1765.91	Apo	0.05	1767.23	0.049436	0.29139	0.050697	9.27919	0.003687
Beclin1	326	339	QRYRLVPYGNHSYL			12	1765.91	Apo	0.5	1767.49	0.047179	0.55036	0.048499	9.29202	0.006105
Beclin1	326	339	QRYRLVPYGNHSYL			12	1765.91	Apo	5	1768.06	0.081492	1.12001	0.082263	9.3359	0.01296
Beclin1	326	339	QRYRLVPYGNHSYL			12	1765.91	Apo	50	1768.37	0.031874	1.43789	0.033797	9.3729	0.012604
Beclin1	326	339	QRYRLVPYGNHSYL			12	1765.91	Lipids	0	1766.94	0.011238	0	0	9.23353	0.000607
Beclin1	326	339	QRYRLVPYGNHSYL			12	1765.91	Lipids	0.005	1767.14	0.084043	0.208833	0.084791	9.28796	0.015048
Beclin1	326	339	QRYRLVPYGNHSYL			12	1765.91	Lipids	0.05	1767.23	0.092408	0.294598	0.093089	9.30978	0.011088
Beclin1	326	339	QRYRLVPYGNHSYL			12	1765.91	Lipids	0.5	1767.37	0.068325	0.429459	0.069243	9.31993	0.009398
Beclin1	326	339	QRYRLVPYGNHSYL			12	1765.91	Lipids	5	1767.75	0.206162	0.812709	0.206468	9.36222	0.008082
Beclin1	326	339	QRYRLVPYGNHSYL			12	1765.91	Lipids	50	1768.11	0.092478	1.17412	0.093158	9.40292	0.012785
Beclin1	339	346	LESLTDKS			7	892.462	Apo	0	892.909	0	0	0	5.19702	0
Beclin1	339	346	LESLTDKS			7	892.462	Apo	0.005	893.614	0.003287	0.705303	0.003287	5.21731	0.004209
Beclin1	339	346	LESLTDKS			7	892.462	Apo	0.05	893.955	0.027144	1.04658	0.027144	5.21849	0.0022
Beclin1	339	346	LESLTDKS			7	892.462	Apo	0.5	894.095	0.048921	1.18582	0.048921	5.22104	0.004394
Beclin1	339	346	LESLTDKS			7	892.462	Apo	5	894.451	0.053145	1.54265	0.053145	5.23405	0.008612
Beclin1	339	346	LESLTDKS			7	892.462	Apo	50	894.724	0.018287	1.81577	0.018287	5.23995	0.001756
Beclin1	339	346	LESLTDKS			7	892.462	Lipids	0	892.909	0	0	0	5.19702	0
Beclin1	339	346	LESLTDKS			7	892.462	Lipids	0.005	893.609	0.027572	0.700101	0.027572	5.21824	0.00278
Beclin1	339	346	LESLTDKS			7	892.462	Lipids	0.05	893.98	0.015327	1.07178	0.015327	5.22563	0.006344
Beclin1	339	346	LESLTDKS			7	892.462	Lipids	0.5	894.103	0.037039	1.19432	0.037039	5.23514	0.005482
Beclin1	339	346	LESLTDKS			7	892.462	Lipids	5	894.466	0.065391	1.5573	0.065391	5.23906	0.002754
Beclin1	339	346	LESLTDKS			7	892.462	Lipids	50	894.673	0.056776	1.76464	0.056776	5.24488	0.002333
Beclin1	340	359	ESLTDKSKELPLYCSGGLRF			18	2243.14	Apo	0	2244.38	0	0	0	11.2699	0
Beclin1	340	359	ESLTDKSKELPLYCSGGLRF			18	2243.14	Apo	0.005	2249.5	0.056847	5.11812	0.056847	11.2857	0.012688
Beclin1	340	359	ESLTDKSKELPLYCSGGLRF			18	2243.14	Apo	0.05	2249.71	0.28665	5.32476	0.28665	11.2889	0.002741
Beclin1	340	359	ESLTDKSKELPLYCSGGLRF			18	2243.14	Apo	0.5	2250.41	0.108399	6.02981	0.108399	11.295	0.011676
Beclin1	340	359	ESLTDKSKELPLYCSGGLRF			18	2243.14	Apo	5	2250.87	0.089405	6.48631	0.089405	11.3404	0.015398
Beclin1	340	359	ESLTDKSKELPLYCSGGLRF			18	2243.14	Apo	50	2250.97	0.099897	6.58523	0.099897	11.3653	0.011212
Beclin1	340	359	ESLTDKSKELPLYCSGGLRF			18	2243.14	Lipids	0	2244.38	0	0	0	11.2699	0
Beclin1	340	359	ESLTDKSKELPLYCSGGLRF			18	2243.14	Lipids	0.005	2249.08	0.263796	4.69979	0.263796	11.2958	0.01097
Beclin1	340	359	ESLTDKSKELPLYCSGGLRF			18	2243.14	Lipids	0.05	2249.63	0.046625	5.247	0.046625	11.3032	0.009301
Beclin1	340	359	ESLTDKSKELPLYCSGGLRF			18	2243.14	Lipids	0.5	2250.14	0.139093	5.75964	0.139093	11.3163	0.006431
Beclin1	340	359	ESLTDKSKELPLYCSGGLRF			18	2243.14	Lipids	5	2249.97	0.623722	5.587	0.623722	11.349	0.005533
Beclin1	340	359	ESLTDKSKELPLYCSGGLRF			18	2243.14	Lipids	50	2250.35	0.309343	5.96605	0.309343	11.3833	0.011504
Beclin1	351	357	LYCSGGL			6	712.333	Apo	0	712.534	0	0	0	8.86561	0
Beclin1	351	357	LYCSGGL			6	712.333	Apo	0.005	712.652	0.100938	0.117208	0.100938	8.8787	0.016376
Beclin1	351	357	LYCSGGL			6	712.333	Apo	0.05	712.597	0.024678	0.063093	0.024678	8.88481	0.001251
Beclin1	351	357	LYCSGGL			6	712.333	Apo	0.5	712.639	0.039625	0.104451	0.039625	8.88894	0.007548
Beclin1	351	357	LYCSGGL			6	712.333	Apo	5	712.76	0.008307	0.225291	0.008307	8.90833	0.005891
Beclin1	351	357	LYCSGGL			6	712.333	Apo	50	712.87	0.041221	0.33598	0.041221	8.91301	0.002393
Beclin1	351	357	LYCSGGL			6	712.333	Lipids	0	712.534	0	0	0	8.86561	0
Beclin1	351	357	LYCSGGL			6	712.333	Lipids	0.005	712.698	0.08814	0.163269	0.08814	8.89323	0.008591
Beclin1	351	357	LYCSGGL			6	712.333	Lipids	0.05	712.727	0.074004	0.19298	0.074004	8.90275	0.006073
Beclin1	351	357	LYCSGGL			6	712.333	Lipids	0.5	712.805	0.049704	0.270337	0.049704	8.91928	0.026597
Beclin1	351	357	LYCSGGL			6	712.333	Lipids	5	712.755	0.061689	0.220907	0.061689	8.91759	0.003973
Beclin1	351	357	LYCSGGL			6	712.333	Lipids	50	712.926	0.031986	0.391873	0.031986	8.92012	0.001564
Beclin1	354	374	SGGLRFFWDNKFDHAMVAFLD			20	2473.18	Apo	0	2474.47	0	0	0	9.89909	0
Beclin1	354	374	SGGLRFFWDNKFDHAMVAFLD			20	2473.18	Apo	0.005	2479.9	0.085074	5.43386	0.085074	9.92312	0.013314
Beclin1	354	374	SGGLRFFWDNKFDHAMVAFLD			20	2473.18	Apo	0.05	2480.35	0.100061	5.87765	0.100061	9.91819	0.002477
Beclin1	354	374	SGGLRFFWDNKFDHAMVAFLD			20	2473.18	Apo	0.5	2480.75	0.12502	6.28063	0.12502	9.92731	0.009608
Beclin1	354	374	SGGLRFFWDNKFDHAMVAFLD			20	2473.18	Apo	5	2481.2	0.200941	6.72975	0.200941	9.96108	0.014093
Beclin1	354	374	SGGLRFFWDNKFDHAMVAFLD			20	2473.18	Apo	50	2481.59	0	7.11863	0	9.97362	0
Beclin1	354	374	SGGLRFFWDNKFDHAMVAFLD			20	2473.18	Lipids	0	2474.47	0	0	0	9.89909	0
Beclin1	354	374	SGGLRFFWDNKFDHAMVAFLD			20	2473.18	Lipids	0.005	2479.89	0.105171	5.42323	0.105171	9.92707	0.009625
Beclin1	354	374	SGGLRFFWDNKFDHAMVAFLD			20	2473.18	Lipids	0.05	2480.63	0.203886	6.16143	0.203886	9.93367	0.009753
Beclin1	354	374	SGGLRFFWDNKFDHAMVAFLD			20	2473.18	Lipids	0.5	2481.02	0.091514	6.55357	0.091514	9.94776	0.006456
Beclin1	354	374	SGGLRFFWDNKFDHAMVAFLD			20	2473.18	Lipids	5	2481.6	0.187984	7.12651	0.187984	9.97392	0.002008
Beclin1	354	374	SGGLRFFWDNKFDHAMVAFLD			20	2473.18	Lipids	50	2481.84	0.10348	7.37399	0.10348	9.99217	0.004289
Beclin1	360	369	FWDNKFDHAM			9	1310.56	Apo	0	1311.56	0	0	0	10.1964	0
Beclin1	360	369	FWDNKFDHAM			9	1310.56	Apo	0.005	1311.93	0.020579	0.372392	0.020579	10.2517	0.012139
Beclin1	360	369	FWDNKFDHAM			9	1310.56	Apo	0.05	1311.95	0.056309	0.385178	0.056309	10.2296	0.003384
Beclin1	360	369	FWDNKFDHAM			9	1310.56	Apo	0.5	1312.1	0.049652	0.540988	0.049652	10.2394	0.012305
Beclin1	360	369	FWDNKFDHAM			9	1310.56	Apo	5	1312.58	0.067865	1.01598	0.067865	10.2868	0.005302
Beclin1	360	369	FWDNKFDHAM			9	1310.56	Apo	50	1312.65	0.027821	1.08478	0.027821	10.3129	0.008891
Beclin1	360	369	FWDNKFDHAM			9	1310.56	Lipids	0	1311.56	0	0	0	10.1964	0
Beclin1	360	369	FWDNKFDHAM			9	1310.56	Lipids	0.005	1311.81	0.047866	0.247928	0.047866	10.2393	0.011044
Beclin1	360	369	FWDNKFDHAM			9	1310.56	Lipids	0.05	1312.01	0.057074	0.44845	0.057074	10.2501	0.012545
Beclin1	360	369	FWDNKFDHAM			9	1310.56	Lipids	0.5	1312.01	0.023957	0.443914	0.023957	10.2642	0.004783
Beclin1	360	369	FWDNKFDHAM			9	1310.56	Lipids	5	1312.39	0.059262	0.830346	0.059262	10.303	0.006974
Beclin1	360	369	FWDNKFDHAM			9	1310.56	Lipids	50	1312.49	0.055394	0.923884	0.055394	10.3241	0.008928
Beclin1	360	370	FWDNKFDHAMV			10	1409.63	Apo	0	1410.39	0	0	0	10.714	0
Beclin1	360	370	FWDNKFDHAMV			10	1409.63	Apo	0.005	1410.92	0.037097	0.53059	0.037097	10.7446	0.008031
Beclin1	360	370	FWDNKFDHAMV			10	1409.63	Apo	0.05	1411.03	0.010891	0.639971	0.010891	10.7372	0.005085
Beclin1	360	370	FWDNKFDHAMV			10	1409.63	Apo	0.5	1411.19	0.038673	0.801129	0.038673	10.7605	0.009444
Beclin1	360	370	FWDNKFDHAMV			10	1409.63	Apo	5	1411.67	0.001731	1.27337	0.001731	10.7973	0.012501
Beclin1	360	370	FWDNKFDHAMV			10	1409.63	Apo	50	1411.8	0.010798	1.40325	0.010798	10.8342	0.010845
Beclin1	360	370	FWDNKFDHAMV			10	1409.63	Lipids	0	1410.39	0	0	0	10.714	0
Beclin1	360	370	FWDNKFDHAMV			10	1409.63	Lipids	0.005	1410.99	0.04697	0.593785	0.04697	10.7577	0.010958
Beclin1	360	370	FWDNKFDHAMV			10	1409.63	Lipids	0.05	1411.1	0.068328	0.711752	0.068328	10.7697	0.011188
Beclin1	360	370	FWDNKFDHAMV			10	1409.63	Lipids	0.5	1411.35	0.068386	0.955209	0.068386	10.7729	0.005475
Beclin1	360	370	FWDNKFDHAMV			10	1409.63	Lipids	5	1411.59	0.046559	1.19358	0.046559	10.8122	0.002327
Beclin1	360	370	FWDNKFDHAMV			10	1409.63	Lipids	50	1411.72	0.085565	1.32515	0.085565	10.8427	0.009632
Beclin1	362	372	DNKFDHAMVAF			10	1294.59	Apo	0	1295.21	0	0	0	8.24372	0
Beclin1	362	372	DNKFDHAMVAF			10	1294.59	Apo	0.005	1297.3	0.071817	2.09293	0.071817	8.2785	0.019401
Beclin1	362	372	DNKFDHAMVAF			10	1294.59	Apo	0.05	1297.36	0.090188	2.14966	0.090188	8.27642	0.00366
Beclin1	362	372	DNKFDHAMVAF			10	1294.59	Apo	0.5	1297.43	0.065699	2.22323	0.065699	8.28182	0.00555
Beclin1	362	372	DNKFDHAMVAF			10	1294.59	Apo	5	1297.68	0.038531	2.47082	0.038531	8.31474	0.00908
Beclin1	362	372	DNKFDHAMVAF			10	1294.59	Apo	50	1298.08	0.010785	2.86884	0.010785	8.32973	0.006586
Beclin1	362	372	DNKFDHAMVAF			10	1294.59	Lipids	0	1295.21	0	0	0	8.24372	0
Beclin1	362	372	DNKFDHAMVAF			10	1294.59	Lipids	0.005	1297.25	0.023324	2.04057	0.023324	8.28891	0.008832
Beclin1	362	372	DNKFDHAMVAF			10	1294.59	Lipids	0.05	1297.37	0.054377	2.15955	0.054377	8.30175	0.011552
Beclin1	362	372	DNKFDHAMVAF			10	1294.59	Lipids	0.5	1297.53	0.025989	2.32082	0.025989	8.3097	0.005782
Beclin1	362	372	DNKFDHAMVAF			10	1294.59	Lipids	5	1297.66	0.031623	2.45412	0.031623	8.33461	0.004404
Beclin1	362	372	DNKFDHAMVAF			10	1294.59	Lipids	50	1298.12	0.052158	2.90875	0.052158	8.34059	0.000331
Beclin1	372	382	FLDCVQQFKEE			10	1385.64	Apo	0	1386.23	0	0	0	10.1008	0
Beclin1	372	382	FLDCVQQFKEE			10	1385.64	Apo	0.005	1387.89	0.068945	1.66252	0.068945	10.131	0.016794
Beclin1	372	382	FLDCVQQFKEE			10	1385.64	Apo	0.05	1388.14	0.012298	1.90959	0.012298	10.1097	0.003664
Beclin1	372	382	FLDCVQQFKEE			10	1385.64	Apo	0.5	1388.34	0.034492	2.11044	0.034492	10.12	0.005249
Beclin1	372	382	FLDCVQQFKEE			10	1385.64	Apo	5	1389.13	0.011053	2.90076	0.011053	10.1438	0.011251
Beclin1	372	382	FLDCVQQFKEE			10	1385.64	Apo	50	1389.8	0.01485	3.57725	0.01485	10.1493	0.003033
Beclin1	372	382	FLDCVQQFKEE			10	1385.64	Lipids	0	1386.23	0	0	0	10.1008	0
Beclin1	372	382	FLDCVQQFKEE			10	1385.64	Lipids	0.005	1387.86	0.030899	1.63464	0.030899	10.1286	0.012432
Beclin1	372	382	FLDCVQQFKEE			10	1385.64	Lipids	0.05	1388.25	0.062144	2.02067	0.062144	10.1315	0.010011
Beclin1	372	382	FLDCVQQFKEE			10	1385.64	Lipids	0.5	1388.61	0.042927	2.38571	0.042927	10.1328	0.008471
Beclin1	372	382	FLDCVQQFKEE			10	1385.64	Lipids	5	1389.22	0.029603	2.99519	0.029603	10.1523	0.005607
Beclin1	372	382	FLDCVQQFKEE			10	1385.64	Lipids	50	1389.93	0.07642	3.70401	0.07642	10.1558	0.002611
Beclin1	378	391	QFKEEVEKGETRFC			13	1729.82	Apo	0	1730.74	0	0	0	7.32445	0
Beclin1	378	391	QFKEEVEKGETRFC			13	1729.82	Apo	0.005	1732.78	0.031627	2.03864	0.031627	7.34608	0.019353
Beclin1	378	391	QFKEEVEKGETRFC			13	1729.82	Apo	0.05	1733.41	0.061661	2.67098	0.061661	7.3438	0.001202
Beclin1	378	391	QFKEEVEKGETRFC			13	1729.82	Apo	0.5	1733.74	0.120774	3.00142	0.120774	7.34504	0.008453
Beclin1	378	391	QFKEEVEKGETRFC			13	1729.82	Apo	5	1734.36	0.020169	3.61817	0.020169	7.37155	0.007112
Beclin1	378	391	QFKEEVEKGETRFC			13	1729.82	Apo	50	1734.76	0.05244	4.02287	0.05244	7.37537	0.004241
Beclin1	378	391	QFKEEVEKGETRFC			13	1729.82	Lipids	0	1730.74	0	0	0	7.32445	0
Beclin1	378	391	QFKEEVEKGETRFC			13	1729.82	Lipids	0.005	1732.68	0.079985	1.94026	0.079985	7.3526	0.005882
Beclin1	378	391	QFKEEVEKGETRFC			13	1729.82	Lipids	0.05	1733.29	0.025889	2.55449	0.025889	7.35973	0.01136
Beclin1	378	391	QFKEEVEKGETRFC			13	1729.82	Lipids	0.5	1733.72	0.089727	2.98042	0.089727	7.35794	0.011194
Beclin1	378	391	QFKEEVEKGETRFC			13	1729.82	Lipids	5	1734.31	0.200459	3.56993	0.200459	7.3739	0.003852
Beclin1	378	391	QFKEEVEKGETRFC			13	1729.82	Lipids	50	1734.73	0.07127	3.99598	0.07127	7.38372	0.003373
Beclin1	379	390	FKEEVEKGETRF			11	1498.75	Apo	0	1499.54	0.028052	0	0	7.29381	0.004405
Beclin1	379	390	FKEEVEKGETRF			11	1498.75	Apo	0.005	1501.51	0.034198	1.96891	0.044231	7.31663	0.016923
Beclin1	379	390	FKEEVEKGETRF			11	1498.75	Apo	0.05	1501.64	0.05037	2.09547	0.057655	7.32409	0.001845
Beclin1	379	390	FKEEVEKGETRF			11	1498.75	Apo	0.5	1501.79	0.090369	2.25046	0.094623	7.32911	0.004707
Beclin1	379	390	FKEEVEKGETRF			11	1498.75	Apo	5	1502.17	0.041531	2.62545	0.050117	7.35046	0.009334
Beclin1	379	390	FKEEVEKGETRF			11	1498.75	Apo	50	1502.39	0.240134	2.8496	0.241766	7.36054	0.005123
Beclin1	379	390	FKEEVEKGETRF			11	1498.75	Lipids	0	1499.53	0	0	0	7.29195	0
Beclin1	379	390	FKEEVEKGETRF			11	1498.75	Lipids	0.005	1501.41	0.042788	1.88359	0.042788	7.33558	0.007024
Beclin1	379	390	FKEEVEKGETRF			11	1498.75	Lipids	0.05	1501.62	0.025138	2.08778	0.025138	7.34294	0.007182
Beclin1	379	390	FKEEVEKGETRF			11	1498.75	Lipids	0.5	1501.72	0.073133	2.18478	0.073133	7.3468	0.010883
Beclin1	379	390	FKEEVEKGETRF			11	1498.75	Lipids	5	1501.9	0.0472	2.36415	0.0472	7.36415	0.004274
Beclin1	379	390	FKEEVEKGETRF			11	1498.75	Lipids	50	1502.18	0.055441	2.6474	0.055441	7.37556	0.003874
Beclin1	383	392	VEKGETRFCL			9	1181.6	Apo	0	1182.01	0	0	0	5.63153	0
Beclin1	383	392	VEKGETRFCL			9	1181.6	Apo	0.005	1182.77	0.024323	0.763424	0.024323	5.63714	0.007675
Beclin1	383	392	VEKGETRFCL			9	1181.6	Apo	0.05	1182.81	0.007009	0.800668	0.007009	5.63968	0.001406
Beclin1	383	392	VEKGETRFCL			9	1181.6	Apo	0.5	1182.95	0.057901	0.939055	0.057901	5.64044	0.005882
Beclin1	383	392	VEKGETRFCL			9	1181.6	Apo	5	1183.3	0.038195	1.2921	0.038195	5.64989	0.009608
Beclin1	383	392	VEKGETRFCL			9	1181.6	Apo	50	1183.98	0.061537	1.97267	0.061537	5.65927	0.001718
Beclin1	383	392	VEKGETRFCL			9	1181.6	Lipids	0	1182.01	0	0	0	5.63153	0
Beclin1	383	392	VEKGETRFCL			9	1181.6	Lipids	0.005	1182.67	0.017787	0.665459	0.017787	5.64345	0.008892
Beclin1	383	392	VEKGETRFCL			9	1181.6	Lipids	0.05	1182.88	0.01653	0.871395	0.01653	5.64752	0.002631
Beclin1	383	392	VEKGETRFCL			9	1181.6	Lipids	0.5	1183	0.05721	0.989606	0.05721	5.65404	0.003097
Beclin1	383	392	VEKGETRFCL			9	1181.6	Lipids	5	1183.3	0.047634	1.28889	0.047634	5.65888	0.00389
Beclin1	383	392	VEKGETRFCL			9	1181.6	Lipids	50	1183.85	0.019121	1.84295	0.019121	5.66479	0.003884
Beclin1	388	408	TRFCLPYRMDVEKGKIEDTGG			19	2415.18	Apo	0	2416.63	0	0	0	6.12903	0
Beclin1	388	408	TRFCLPYRMDVEKGKIEDTGG			19	2415.18	Apo	0.005	2417.16	0.059328	0.530786	0.059328	6.14451	0.008793
Beclin1	388	408	TRFCLPYRMDVEKGKIEDTGG			19	2415.18	Apo	0.05	2417.32	0.089523	0.693091	0.089523	6.14587	0.003837
Beclin1	388	408	TRFCLPYRMDVEKGKIEDTGG			19	2415.18	Apo	0.5	2417.72	0.036276	1.08736	0.036276	6.14527	0.00721
Beclin1	388	408	TRFCLPYRMDVEKGKIEDTGG			19	2415.18	Apo	5	2418.24	0.115938	1.60864	0.115938	6.16228	0.00859
Beclin1	388	408	TRFCLPYRMDVEKGKIEDTGG			19	2415.18	Apo	50	2418.47	0.037469	1.84163	0.037469	6.16513	0.003227
Beclin1	388	408	TRFCLPYRMDVEKGKIEDTGG			19	2415.18	Lipids	0	2416.63	0	0	0	6.12903	0
Beclin1	388	408	TRFCLPYRMDVEKGKIEDTGG			19	2415.18	Lipids	0.005	2417.14	0.081598	0.508591	0.081598	6.14587	0.007643
Beclin1	388	408	TRFCLPYRMDVEKGKIEDTGG			19	2415.18	Lipids	0.05	2417.32	0.020177	0.686887	0.020177	6.15331	0.009
Beclin1	388	408	TRFCLPYRMDVEKGKIEDTGG			19	2415.18	Lipids	0.5	2417.73	0.031473	1.09662	0.031473	6.1609	0.007871
Beclin1	388	408	TRFCLPYRMDVEKGKIEDTGG			19	2415.18	Lipids	5	2418.21	0.054422	1.57997	0.054422	6.16946	0.001761
Beclin1	388	408	TRFCLPYRMDVEKGKIEDTGG			19	2415.18	Lipids	50	2418.34	0.046957	1.70508	0.046957	6.17929	0.004401
Beclin1	397	408	DVEKGKIEDTGG			11	1247.61	Apo	0	1248.12	0.033803	0	0	8.76833	0.000151
Beclin1	397	408	DVEKGKIEDTGG			11	1247.61	Apo	0.005	1250.27	0.088069	2.15426	0.094333	8.80428	0.011069
Beclin1	397	408	DVEKGKIEDTGG			11	1247.61	Apo	0.05	1251.76	0.131049	3.63679	0.135338	8.79483	0.004299
Beclin1	397	408	DVEKGKIEDTGG			11	1247.61	Apo	0.5	1251.95	0.103193	3.8324	0.108589	8.79649	0.008925
Beclin1	397	408	DVEKGKIEDTGG			11	1247.61	Apo	5	1252.14	0.02493	4.02238	0.042002	8.82629	0.005713
Beclin1	397	408	DVEKGKIEDTGG			11	1247.61	Apo	50	1252.38	0.021319	4.25513	0.039964	8.8427	0.00762
Beclin1	397	408	DVEKGKIEDTGG			11	1247.61	Lipids	0	1248.12	0.033803	0	0	8.76833	0.000151
Beclin1	397	408	DVEKGKIEDTGG			11	1247.61	Lipids	0.005	1250.24	0.095107	2.11816	0.100936	8.82398	0.011864
Beclin1	397	408	DVEKGKIEDTGG			11	1247.61	Lipids	0.05	1251.7	0.072001	3.57574	0.079541	8.81733	0.00795
Beclin1	397	408	DVEKGKIEDTGG			11	1247.61	Lipids	0.5	1252.04	0.109507	3.91918	0.114606	8.82194	0.007015
Beclin1	397	408	DVEKGKIEDTGG			11	1247.61	Lipids	5	1252.18	0.10548	4.06213	0.110764	8.84354	0.006067
Beclin1	397	408	DVEKGKIEDTGG			11	1247.61	Lipids	50	1252.43	0.06924	4.30966	0.077051	8.85577	0.00805
Beclin1	397	412	DVEKGKIEDTGGSGGS			15	1535.72	Apo	0	1536.52	0	0	0	5.50347	0
Beclin1	397	412	DVEKGKIEDTGGSGGS			15	1535.72	Apo	0.005	1539.52	0.047477	3.00133	0.047477	5.49851	0.002555
Beclin1	397	412	DVEKGKIEDTGGSGGS			15	1535.72	Apo	0.05	1539.74	0.225768	3.22456	0.225768	5.50106	0.001602
Beclin1	397	412	DVEKGKIEDTGGSGGS			15	1535.72	Apo	0.5	1540.14	0.07799	3.62035	0.07799	5.49473	0.001885
Beclin1	397	412	DVEKGKIEDTGGSGGS			15	1535.72	Apo	5	1540.55	0.139879	4.03343	0.139879	5.5115	0.00378
Beclin1	397	412	DVEKGKIEDTGGSGGS			15	1535.72	Apo	50	1540.94	0.145139	4.41674	0.145139	5.51056	0.000945
Beclin1	397	412	DVEKGKIEDTGGSGGS			15	1535.72	Lipids	0	1536.52	0	0	0	5.50347	0
Beclin1	397	412	DVEKGKIEDTGGSGGS			15	1535.72	Lipids	0.005	1539.07	0.252728	2.54786	0.252728	5.50412	0.00518
Beclin1	397	412	DVEKGKIEDTGGSGGS			15	1535.72	Lipids	0.05	1539.64	0.077164	3.11819	0.077164	5.50699	0.001113
Beclin1	397	412	DVEKGKIEDTGGSGGS			15	1535.72	Lipids	0.5	1539.81	0.134232	3.29256	0.134232	5.50932	0.001142
Beclin1	397	412	DVEKGKIEDTGGSGGS			15	1535.72	Lipids	5	1539.87	0.365471	3.34666	0.365471	5.51159	0.001762
Beclin1	397	412	DVEKGKIEDTGGSGGS			15	1535.72	Lipids	50	1540.4	0.287096	3.88318	0.287096	5.50898	0.003316
Beclin1	397	413	DVEKGKIEDTGGSGGSY			16	1698.78	Apo	0	1699.37	0	0	0	6.72792	0
Beclin1	397	413	DVEKGKIEDTGGSGGSY			16	1698.78	Apo	0.005	1702.55	0.034622	3.17916	0.034622	6.74125	0.009316
Beclin1	397	413	DVEKGKIEDTGGSGGSY			16	1698.78	Apo	0.05	1702.86	0.199139	3.4871	0.199139	6.74285	0.002309
Beclin1	397	413	DVEKGKIEDTGGSGGSY			16	1698.78	Apo	0.5	1703.18	0.091836	3.81003	0.091836	6.73698	0.009816
Beclin1	397	413	DVEKGKIEDTGGSGGSY			16	1698.78	Apo	5	1703.81	0.098768	4.44646	0.098768	6.75485	0.006914
Beclin1	397	413	DVEKGKIEDTGGSGGSY			16	1698.78	Apo	50	1704.4	0.094615	5.03344	0.094615	6.75466	0.001579
Beclin1	397	413	DVEKGKIEDTGGSGGSY			16	1698.78	Lipids	0	1699.37	0	0	0	6.72792	0
Beclin1	397	413	DVEKGKIEDTGGSGGSY			16	1698.78	Lipids	0.005	1702.22	0.108438	2.85382	0.108438	6.74519	0.010368
Beclin1	397	413	DVEKGKIEDTGGSGGSY			16	1698.78	Lipids	0.05	1702.77	0.213209	3.4032	0.213209	6.75124	0.000271
Beclin1	397	413	DVEKGKIEDTGGSGGSY			16	1698.78	Lipids	0.5	1703.02	0.149206	3.65565	0.149206	6.7525	0.009435
Beclin1	397	413	DVEKGKIEDTGGSGGSY			16	1698.78	Lipids	5	1702.86	0.437445	3.48982	0.437445	6.76519	0.005768
Beclin1	397	413	DVEKGKIEDTGGSGGSY			16	1698.78	Lipids	50	1703.74	0.275808	4.37347	0.275808	6.76047	0.001464
Beclin1	413	419	YSIKTQF			6	886.467	Apo	0	886.729	0.05286	0	0	9.26081	0.000582
Beclin1	413	419	YSIKTQF			6	886.467	Apo	0.005	887.357	0.040983	0.627802	0.066887	9.28993	0.010502
Beclin1	413	419	YSIKTQF			6	886.467	Apo	0.05	887.321	0.15837	0.591597	0.166959	9.29154	0.001818
Beclin1	413	419	YSIKTQF			6	886.467	Apo	0.5	887.395	0.063027	0.665241	0.082259	9.29659	0.003564
Beclin1	413	419	YSIKTQF			6	886.467	Apo	5	887.737	0.042817	1.00804	0.068026	9.32437	0.00755
Beclin1	413	419	YSIKTQF			6	886.467	Apo	50	888.462	0.094162	1.73297	0.107984	9.33538	0.003014
Beclin1	413	419	YSIKTQF			6	886.467	Lipids	0	886.729	0.05286	0	0	9.26081	0.000582
Beclin1	413	419	YSIKTQF			6	886.467	Lipids	0.005	887.252	0.114235	0.522315	0.125872	9.30584	0.012381
Beclin1	413	419	YSIKTQF			6	886.467	Lipids	0.05	887.416	0.05092	0.686799	0.073396	9.31524	0.006236
Beclin1	413	419	YSIKTQF			6	886.467	Lipids	0.5	887.519	0.160603	0.789307	0.169079	9.3273	0.002908
Beclin1	413	419	YSIKTQF			6	886.467	Lipids	5	887.545	0.058713	0.815534	0.079003	9.34084	0.00495
Beclin1	413	419	YSIKTQF			6	886.467	Lipids	50	888.026	0.095944	1.2972	0.109542	9.35209	0.009499
Beclin1	420	431	NSEEQWTKALKF			11	1480.74	Apo	0	1481.47	0	0	0	11.0206	0
Beclin1	420	431	NSEEQWTKALKF			11	1480.74	Apo	0.005	1481.74	0.032837	0.273067	0.032837	11.0426	0.011531
Beclin1	420	431	NSEEQWTKALKF			11	1480.74	Apo	0.05	1481.88	0.029947	0.417722	0.029947	11.0402	0.00302
Beclin1	420	431	NSEEQWTKALKF			11	1480.74	Apo	0.5	1482.14	0.085207	0.675291	0.085207	11.0454	0.012394
Beclin1	420	431	NSEEQWTKALKF			11	1480.74	Apo	5	1482.38	0.03775	0.917048	0.03775	11.0799	0.014827
Beclin1	420	431	NSEEQWTKALKF			11	1480.74	Apo	50	1482.45	0.152507	0.984085	0.152507	11.0886	0.017688
Beclin1	420	431	NSEEQWTKALKF			11	1480.74	Lipids	0	1481.47	0	0	0	11.0206	0
Beclin1	420	431	NSEEQWTKALKF			11	1480.74	Lipids	0.005	1481.74	0.055092	0.27107	0.055092	11.0477	0.009907
Beclin1	420	431	NSEEQWTKALKF			11	1480.74	Lipids	0.05	1481.92	0.015238	0.452409	0.015238	11.0523	0.009819
Beclin1	420	431	NSEEQWTKALKF			11	1480.74	Lipids	0.5	1482.13	0.06152	0.663204	0.06152	11.06	0.004183
Beclin1	420	431	NSEEQWTKALKF			11	1480.74	Lipids	5	1482.19	0.021755	0.722155	0.021755	11.0878	0.000976
Beclin1	420	431	NSEEQWTKALKF			11	1480.74	Lipids	50	1482.22	0.050919	0.751708	0.050919	11.1148	0.009477
Beclin1	432	440	MLTNLKWGL			8	1075.6	Apo	0	1076.3	0.017605	0	0	12.2703	0.000408
Beclin1	432	440	MLTNLKWGL			8	1075.6	Apo	0.005	1076.27	0.097354	-0.038027	0.098933	12.2865	0.010912
Beclin1	432	440	MLTNLKWGL			8	1075.6	Apo	0.05	1076.31	0.013593	0.009205	0.022242	12.2872	0.007566
Beclin1	432	440	MLTNLKWGL			8	1075.6	Apo	0.5	1076.29	0.039441	-0.015382	0.043191	12.2916	0.005857
Beclin1	432	440	MLTNLKWGL			8	1075.6	Apo	5	1076.23	0.009434	-0.077283	0.019973	12.3341	0.015558
Beclin1	432	440	MLTNLKWGL			8	1075.6	Apo	50	1076.3	0.019844	-0.001535	0.026527	12.3537	0.003577
Beclin1	432	440	MLTNLKWGL			8	1075.6	Lipids	0	1076.3	0.017605	0	0	12.2703	0.000408
Beclin1	432	440	MLTNLKWGL			8	1075.6	Lipids	0.005	1076.31	0.100305	0.009773	0.101838	12.2981	0.016135
Beclin1	432	440	MLTNLKWGL			8	1075.6	Lipids	0.05	1076.38	0.054652	0.072453	0.057417	12.3	0.007473
Beclin1	432	440	MLTNLKWGL			8	1075.6	Lipids	0.5	1076.4	0.049778	0.096855	0.052799	12.3107	0.015198
Beclin1	432	440	MLTNLKWGL			8	1075.6	Lipids	5	1076.34	0.046503	0.037322	0.049724	12.3433	0.003741
Beclin1	432	440	MLTNLKWGL			8	1075.6	Lipids	50	1076.33	0.123511	0.028306	0.12476	12.3597	0.009688
UVRAG	2	14	SASASVGGQVPQP			10	1184.59	Apo	0	1185.29	0	0	0	11.8346	0
UVRAG	2	14	SASASVGGQVPQP			10	1184.59	Apo	0.005	1185.46	0.060789	0.175109	0.060789	11.8537	0.015828
UVRAG	2	14	SASASVGGQVPQP			10	1184.59	Apo	0.05	1185.51	0.024192	0.225984	0.024192	11.8558	0.003176
UVRAG	2	14	SASASVGGQVPQP			10	1184.59	Apo	0.5	1185.71	0.023817	0.421266	0.023817	11.8622	0.00289
UVRAG	2	14	SASASVGGQVPQP			10	1184.59	Apo	5	1185.88	0.028945	0.590441	0.028945	11.895	0.01653
UVRAG	2	14	SASASVGGQVPQP			10	1184.59	Apo	50	1186	0.047554	0.710622	0.047554	11.9173	0.005055
UVRAG	2	14	SASASVGGQVPQP			10	1184.59	Lipids	0	1185.29	0	0	0	11.8346	0
UVRAG	2	14	SASASVGGQVPQP			10	1184.59	Lipids	0.005	1185.4	0.014066	0.107482	0.014066	11.8653	0.011556
UVRAG	2	14	SASASVGGQVPQP			10	1184.59	Lipids	0.05	1185.4	0.036504	0.107296	0.036504	11.8734	0.007587
UVRAG	2	14	SASASVGGQVPQP			10	1184.59	Lipids	0.5	1185.47	0.07868	0.179381	0.07868	11.8866	0.004257
UVRAG	2	14	SASASVGGQVPQP			10	1184.59	Lipids	5	1185.83	0.088368	0.542263	0.088368	11.9086	0.001369
UVRAG	2	14	SASASVGGQVPQP			10	1184.59	Lipids	50	1185.81	0.067431	0.522878	0.067431	11.9276	0.00638
UVRAG	16	30	PGPAAALPPGSAARA			10	1303.71	Apo	0	1304.12	0	0	0	11.3045	0
UVRAG	16	30	PGPAAALPPGSAARA			10	1303.71	Apo	0.005	1306.06	0	1.94051	0	11.3059	0
UVRAG	16	30	PGPAAALPPGSAARA			10	1303.71	Apo	0.05	1306.35	0.030376	2.23395	0.030376	11.2872	0.004294
UVRAG	16	30	PGPAAALPPGSAARA			10	1303.71	Apo	0.5	1306.66	0	2.54646	0	11.2953	0
UVRAG	16	30	PGPAAALPPGSAARA			10	1303.71	Apo	5	1306.98	0.046277	2.86667	0.046277	11.3062	0.008902
UVRAG	16	30	PGPAAALPPGSAARA			10	1303.71	Apo	50	1307.43	0.196479	3.31248	0.196479	11.3063	0.004669
UVRAG	16	30	PGPAAALPPGSAARA			10	1303.71	Lipids	0	1304.12	0	0	0	11.3045	0
UVRAG	16	30	PGPAAALPPGSAARA			10	1303.71	Lipids	0.005	1306.01	0.034392	1.89477	0.034392	11.2991	0.010262
UVRAG	16	30	PGPAAALPPGSAARA			10	1303.71	Lipids	0.05	1306.42	0.036736	2.29817	0.036736	11.298	0.005
UVRAG	16	30	PGPAAALPPGSAARA			10	1303.71	Lipids	0.5	1306.73	0.071444	2.6074	0.071444	11.2989	0.004393
UVRAG	16	30	PGPAAALPPGSAARA			10	1303.71	Lipids	5	1307.02	0.051452	2.90291	0.051452	11.3103	0.004142
UVRAG	16	30	PGPAAALPPGSAARA			10	1303.71	Lipids	50	1307.56	0.000665	3.43756	0.000665	11.3124	0.001879
UVRAG	20	29	AALPPGSAAR			7	910.51	Apo	0	910.906	0	0	0	4.91224	0
UVRAG	20	29	AALPPGSAAR			7	910.51	Apo	0.005	912	0.018683	1.09401	0.018683	4.91924	0.005498
UVRAG	20	29	AALPPGSAAR			7	910.51	Apo	0.05	912.77	0.064042	1.86487	0.064042	4.92182	0.001879
UVRAG	20	29	AALPPGSAAR			7	910.51	Apo	0.5	913.002	0.010228	2.09694	0.010228	4.92608	0.001723
UVRAG	20	29	AALPPGSAAR			7	910.51	Apo	5	913.079	0.063876	2.17344	0.063876	4.93843	0.00625
UVRAG	20	29	AALPPGSAAR			7	910.51	Apo	50	913.027	0.019523	2.12173	0.019523	4.94149	0.002751
UVRAG	20	29	AALPPGSAAR			7	910.51	Lipids	0	910.906	0	0	0	4.91224	0
UVRAG	20	29	AALPPGSAAR			7	910.51	Lipids	0.005	911.846	0.069599	0.940892	0.069599	4.91973	0.004683
UVRAG	20	29	AALPPGSAAR			7	910.51	Lipids	0.05	912.772	0.037898	1.8661	0.037898	4.93365	0.008089
UVRAG	20	29	AALPPGSAAR			7	910.51	Lipids	0.5	912.923	0.076529	2.01773	0.076529	4.93666	0.005491
UVRAG	20	29	AALPPGSAAR			7	910.51	Lipids	5	913.215	0.239336	2.30947	0.239336	4.95108	0.003631
UVRAG	20	29	AALPPGSAAR			7	910.51	Lipids	50	913.018	0.045228	2.11243	0.045228	4.95295	0.003094
UVRAG	28	35	ARALHVEL			7	908.531	Apo	0	908.827	0.044601	0	0	8.51017	0.000675
UVRAG	28	35	ARALHVEL			7	908.531	Apo	0.005	910.898	0.018808	2.07101	0.048404	8.54985	0.017988
UVRAG	28	35	ARALHVEL			7	908.531	Apo	0.05	911.2	0.034731	2.37317	0.056528	8.55056	0.004876
UVRAG	28	35	ARALHVEL			7	908.531	Apo	0.5	911.366	0.024115	2.53847	0.050703	8.55939	0.005571
UVRAG	28	35	ARALHVEL			7	908.531	Apo	5	911.409	0.030173	2.58215	0.053848	8.58963	0.008808
UVRAG	28	35	ARALHVEL			7	908.531	Apo	50	911.336	0.037137	2.50873	0.058038	8.60703	0.005643
UVRAG	28	35	ARALHVEL			7	908.531	Lipids	0	908.827	0.044601	0	0	8.51017	0.000675
UVRAG	28	35	ARALHVEL			7	908.531	Lipids	0.005	910.807	0.087472	1.97999	0.098187	8.55939	0.009632
UVRAG	28	35	ARALHVEL			7	908.531	Lipids	0.05	911.217	0.059045	2.39013	0.073997	8.57198	0.008407
UVRAG	28	35	ARALHVEL			7	908.531	Lipids	0.5	911.392	0.04235	2.5644	0.061504	8.5819	0.007846
UVRAG	28	35	ARALHVEL			7	908.531	Lipids	5	911.413	0.022256	2.5853	0.049845	8.6098	0.004604
UVRAG	28	35	ARALHVEL			7	908.531	Lipids	50	911.443	0.086243	2.61559	0.097093	8.62316	0.007132
UVRAG	32	47	HVELPSQQRRLRHLRN			14	2039.15	Apo	0	2040.24	0	0	0	5.8491	0
UVRAG	32	47	HVELPSQQRRLRHLRN			14	2039.15	Apo	0.005	2041.34	0.155513	1.09806	0.155513	5.87134	0.009386
UVRAG	32	47	HVELPSQQRRLRHLRN			14	2039.15	Apo	0.05	2042.02	0.022864	1.77815	0.022864	5.87926	0.002079
UVRAG	32	47	HVELPSQQRRLRHLRN			14	2039.15	Apo	0.5	2042.86	0.029846	2.62121	0.029846	5.88449	0.007223
UVRAG	32	47	HVELPSQQRRLRHLRN			14	2039.15	Apo	5	2043.3	0.17083	3.05963	0.17083	5.90862	0.010237
UVRAG	32	47	HVELPSQQRRLRHLRN			14	2039.15	Apo	50	2044.07	0.133293	3.82871	0.133293	5.91735	0.009175
UVRAG	32	47	HVELPSQQRRLRHLRN			14	2039.15	Lipids	0	2040.24	0	0	0	5.8491	0
UVRAG	32	47	HVELPSQQRRLRHLRN			14	2039.15	Lipids	0.005	2041.32	0.095477	1.08263	0.095477	5.87759	0.007847
UVRAG	32	47	HVELPSQQRRLRHLRN			14	2039.15	Lipids	0.05	2041.99	0.086162	1.75656	0.086162	5.89143	0.007888
UVRAG	32	47	HVELPSQQRRLRHLRN			14	2039.15	Lipids	0.5	2042.96	0.117971	2.72417	0.117971	5.91032	0.012026
UVRAG	32	47	HVELPSQQRRLRHLRN			14	2039.15	Lipids	5	2043.04	0.072871	2.80603	0.072871	5.92011	0.007493
UVRAG	32	47	HVELPSQQRRLRHLRN			14	2039.15	Lipids	50	2044.35	0.17642	4.11275	0.17642	5.94334	0.003132
UVRAG	33	45	VELPSQQRRLRHL			11	1631.95	Apo	0	1632.83	0	0	0	6.36315	0
UVRAG	33	45	VELPSQQRRLRHL			11	1631.95	Apo	0.005	1633.2	0.068984	0.371858	0.068984	6.41148	0.014603
UVRAG	33	45	VELPSQQRRLRHL			11	1631.95	Apo	0.05	1633.28	0.056183	0.443869	0.056183	6.42228	0.005976
UVRAG	33	45	VELPSQQRRLRHL			11	1631.95	Apo	0.5	1633.58	0.083114	0.746241	0.083114	6.42885	0.011632
UVRAG	33	45	VELPSQQRRLRHL			11	1631.95	Apo	5	1633.9	0.184482	1.068	0.184482	6.4686	0.010349
UVRAG	33	45	VELPSQQRRLRHL			11	1631.95	Apo	50	1634.04	0.265153	1.209	0.265153	6.50433	0.0143
UVRAG	33	45	VELPSQQRRLRHL			11	1631.95	Lipids	0	1632.83	0	0	0	6.36315	0
UVRAG	33	45	VELPSQQRRLRHL			11	1631.95	Lipids	0.005	1633.25	0.03893	0.418309	0.03893	6.42447	0.011583
UVRAG	33	45	VELPSQQRRLRHL			11	1631.95	Lipids	0.05	1633.3	0.093476	0.471448	0.093476	6.4438	0.010117
UVRAG	33	45	VELPSQQRRLRHL			11	1631.95	Lipids	0.5	1633.41	0.168787	0.581942	0.168787	6.46791	0.009134
UVRAG	33	45	VELPSQQRRLRHL			11	1631.95	Lipids	5	1633.76	0.148733	0.924708	0.148733	6.51086	0.014986
UVRAG	33	45	VELPSQQRRLRHL			11	1631.95	Lipids	50	1633.94	0.023015	1.10549	0.023015	6.53773	0.008447
UVRAG	50	62	ARNIVNRNGHQLL			12	1504.85	Apo	0	1505.49	0	0	0	7.33259	0
UVRAG	50	62	ARNIVNRNGHQLL			12	1504.85	Apo	0.005	1507.68	0.019188	2.1849	0.019188	7.36301	0.016364
UVRAG	50	62	ARNIVNRNGHQLL			12	1504.85	Apo	0.05	1507.99	0.069097	2.50111	0.069097	7.36481	0.000436
UVRAG	50	62	ARNIVNRNGHQLL			12	1504.85	Apo	0.5	1508.08	0.084717	2.58751	0.084717	7.37022	0.007072
UVRAG	50	62	ARNIVNRNGHQLL			12	1504.85	Apo	5	1508.47	0.001788	2.98076	0.001788	7.39306	0.007281
UVRAG	50	62	ARNIVNRNGHQLL			12	1504.85	Apo	50	1508.64	0.016948	3.14943	0.016948	7.41055	0.00263
UVRAG	50	62	ARNIVNRNGHQLL			12	1504.85	Lipids	0	1505.49	0	0	0	7.33259	0
UVRAG	50	62	ARNIVNRNGHQLL			12	1504.85	Lipids	0.005	1507.67	0.158632	2.18395	0.158632	7.37663	0.009298
UVRAG	50	62	ARNIVNRNGHQLL			12	1504.85	Lipids	0.05	1508.1	0.03353	2.60654	0.03353	7.38037	0.005214
UVRAG	50	62	ARNIVNRNGHQLL			12	1504.85	Lipids	0.5	1508.16	0.045279	2.66483	0.045279	7.3995	0.001897
UVRAG	50	62	ARNIVNRNGHQLL			12	1504.85	Lipids	5	1508.27	0.090014	2.77988	0.090014	7.40944	0.004699
UVRAG	50	62	ARNIVNRNGHQLL			12	1504.85	Lipids	50	1508.54	0.120812	3.05281	0.120812	7.42511	0.00749
UVRAG	53	62	IVNRNGHQLL			9	1163.66	Apo	0	1164.07	0	0	0	7.49695	0
UVRAG	53	62	IVNRNGHQLL			9	1163.66	Apo	0.005	1166.2	0.142643	2.12386	0.142643	7.55148	0.000215
UVRAG	53	62	IVNRNGHQLL			9	1163.66	Apo	0.05	1166.46	0.058545	2.39006	0.058545	7.54727	0.00302
UVRAG	53	62	IVNRNGHQLL			9	1163.66	Apo	0.5	1166.52	0.02315	2.45167	0.02315	7.55449	0.001066
UVRAG	53	62	IVNRNGHQLL			9	1163.66	Apo	5	1166.66	0.056692	2.59164	0.056692	7.57709	0.010139
UVRAG	53	62	IVNRNGHQLL			9	1163.66	Apo	50	1166.75	0.025254	2.68267	0.025254	7.5935	0.00472
UVRAG	53	62	IVNRNGHQLL			9	1163.66	Lipids	0	1164.07	0	0	0	7.49695	0
UVRAG	53	62	IVNRNGHQLL			9	1163.66	Lipids	0.005	1166.03	0.096234	1.95815	0.096234	7.55267	0.008277
UVRAG	53	62	IVNRNGHQLL			9	1163.66	Lipids	0.05	1166.6	0	2.52679	0	7.57569	0
UVRAG	53	62	IVNRNGHQLL			9	1163.66	Lipids	0.5	1166.67	0.052164	2.59346	0.052164	7.57171	0.007032
UVRAG	53	62	IVNRNGHQLL			9	1163.66	Lipids	5	1166.8	0.103787	2.72431	0.103787	7.58973	0.007365
UVRAG	53	62	IVNRNGHQLL			9	1163.66	Lipids	50	1166.93	0.007652	2.8586	0.007652	7.60546	0.005098
UVRAG	53	64	IVNRNGHQLLDT			11	1379.74	Apo	0	1380.34	0.042758	0	0	7.32469	0.003704
UVRAG	53	64	IVNRNGHQLLDT			11	1379.74	Apo	0.005	1382.26	0.042219	1.92796	0.060089	7.33107	0.015734
UVRAG	53	64	IVNRNGHQLLDT			11	1379.74	Apo	0.05	1382.58	0.078899	2.24991	0.08974	7.34815	0.007372
UVRAG	53	64	IVNRNGHQLLDT			11	1379.74	Apo	0.5	1382.82	0.064763	2.48323	0.077605	7.34251	0.008016
UVRAG	53	64	IVNRNGHQLLDT			11	1379.74	Apo	5	1382.89	0.027835	2.5583	0.05102	7.37595	0.010178
UVRAG	53	64	IVNRNGHQLLDT			11	1379.74	Apo	50	1382.97	0.043986	2.63495	0.061344	7.38501	0.005315
UVRAG	53	64	IVNRNGHQLLDT			11	1379.74	Lipids	0	1380.34	0.042758	0	0	7.32469	0.003704
UVRAG	53	64	IVNRNGHQLLDT			11	1379.74	Lipids	0.005	1382.33	0.026645	1.99226	0.05038	7.35914	0.007999
UVRAG	53	64	IVNRNGHQLLDT			11	1379.74	Lipids	0.05	1382.71	0.084616	2.37716	0.094806	7.35625	0.010912
UVRAG	53	64	IVNRNGHQLLDT			11	1379.74	Lipids	0.5	1382.89	0.017976	2.55648	0.046383	7.36486	0.00964
UVRAG	53	64	IVNRNGHQLLDT			11	1379.74	Lipids	5	1382.97	0.027531	2.63992	0.050854	7.38142	0.002836
UVRAG	53	64	IVNRNGHQLLDT			11	1379.74	Lipids	50	1383.23	0.072221	2.8965	0.083929	7.39131	0.003644
UVRAG	63	76	DTYFTLHLCSTEKI			13	1670.81	Apo	0	1671.87	0.092229	0	0	11.6411	0.001909
UVRAG	63	76	DTYFTLHLCSTEKI			13	1670.81	Apo	0.005	1676.52	0.117792	4.65099	0.149603	11.6459	0.010514
UVRAG	63	76	DTYFTLHLCSTEKI			13	1670.81	Apo	0.05	1676.64	0.112362	4.77301	0.145366	11.6458	0.004994
UVRAG	63	76	DTYFTLHLCSTEKI			13	1670.81	Apo	0.5	1676.72	0.124629	4.84945	0.155044	11.6479	0.006737
UVRAG	63	76	DTYFTLHLCSTEKI			13	1670.81	Apo	5	1676.6	0.132183	4.73029	0.161178	11.6866	0.014452
UVRAG	63	76	DTYFTLHLCSTEKI			13	1670.81	Apo	50	1676.77	0.106024	4.90573	0.140525	11.6991	0.008692
UVRAG	63	76	DTYFTLHLCSTEKI			13	1670.81	Lipids	0	1671.87	0.092229	0	0	11.6411	0.001909
UVRAG	63	76	DTYFTLHLCSTEKI			13	1670.81	Lipids	0.005	1676.35	0.352541	4.48168	0.364405	11.6344	0.003031
UVRAG	63	76	DTYFTLHLCSTEKI			13	1670.81	Lipids	0.05	1676.72	0.092872	4.8518	0.130887	11.6546	0.011478
UVRAG	63	76	DTYFTLHLCSTEKI			13	1670.81	Lipids	0.5	1676.92	0.130381	5.04914	0.159704	11.6642	0.003259
UVRAG	63	76	DTYFTLHLCSTEKI			13	1670.81	Lipids	5	1676.81	0.12955	4.94724	0.159027	11.6869	0.006052
UVRAG	63	76	DTYFTLHLCSTEKI			13	1670.81	Lipids	50	1676.89	0.22841	5.02456	0.246328	11.7025	0.004099
UVRAG	71	79	CSTEKIYKE			8	1100.53	Apo	0	1101.16	0	0	0	5.95596	0
UVRAG	71	79	CSTEKIYKE			8	1100.53	Apo	0.005	1103.23	0.009943	2.06976	0.009943	5.96749	0.00775
UVRAG	71	79	CSTEKIYKE			8	1100.53	Apo	0.05	1104.57	0.078532	3.40935	0.078532	5.96233	0.002853
UVRAG	71	79	CSTEKIYKE			8	1100.53	Apo	0.5	1104.75	0.037737	3.58948	0.037737	5.96461	0.003788
UVRAG	71	79	CSTEKIYKE			8	1100.53	Apo	5	1104.78	0.077267	3.61433	0.077267	5.9821	0.005989
UVRAG	71	79	CSTEKIYKE			8	1100.53	Apo	50	1104.78	0.040915	3.61303	0.040915	5.98942	0.000529
UVRAG	71	79	CSTEKIYKE			8	1100.53	Lipids	0	1101.16	0	0	0	5.95596	0
UVRAG	71	79	CSTEKIYKE			8	1100.53	Lipids	0.005	1103.21	0.024058	2.05137	0.024058	5.9725	0.011547
UVRAG	71	79	CSTEKIYKE			8	1100.53	Lipids	0.05	1104.61	0.037473	3.44329	0.037473	5.97595	0.004675
UVRAG	71	79	CSTEKIYKE			8	1100.53	Lipids	0.5	1104.82	0.058721	3.65609	0.058721	5.97784	0.0071
UVRAG	71	79	CSTEKIYKE			8	1100.53	Lipids	5	1104.87	0.059602	3.70771	0.059602	5.98764	0.003697
UVRAG	71	79	CSTEKIYKE			8	1100.53	Lipids	50	1104.79	0.017018	3.63197	0.017018	6.00009	0.005483
UVRAG	86	99	IKNSLNPTWRSLDF			12	1690.89	Apo	0	1691.91	2.27374e-13	0	0	11.2652	0
UVRAG	86	99	IKNSLNPTWRSLDF			12	1690.89	Apo	0.005	1693.08	0.072896	1.16386	0.072896	11.2957	0.015019
UVRAG	86	99	IKNSLNPTWRSLDF			12	1690.89	Apo	0.05	1693.72	0.052933	1.81161	0.052933	11.2811	0.019357
UVRAG	86	99	IKNSLNPTWRSLDF			12	1690.89	Apo	0.5	1693.9	0.081657	1.99032	0.081657	10.9011	0.143636
UVRAG	86	99	IKNSLNPTWRSLDF			12	1690.89	Apo	5	1694.89	0.007981	2.97575	0.007981	11.3439	0.015039
UVRAG	86	99	IKNSLNPTWRSLDF			12	1690.89	Apo	50	1695.75	0.104075	3.83488	0.104075	11.37	0.009165
UVRAG	86	99	IKNSLNPTWRSLDF			12	1690.89	Lipids	0	1691.91	2.27374e-13	0	0	11.2652	0
UVRAG	86	99	IKNSLNPTWRSLDF			12	1690.89	Lipids	0.005	1693.04	0.065365	1.1253	0.065365	11.3076	0.013672
UVRAG	86	99	IKNSLNPTWRSLDF			12	1690.89	Lipids	0.05	1693.81	0.089646	1.90237	0.089646	11.2958	0.022253
UVRAG	86	99	IKNSLNPTWRSLDF			12	1690.89	Lipids	0.5	1694.22	0.05558	2.30727	0.05558	11.3167	0.006968
UVRAG	86	99	IKNSLNPTWRSLDF			12	1690.89	Lipids	5	1694.92	0.060289	3.00513	0.060289	11.3566	0.00387
UVRAG	86	99	IKNSLNPTWRSLDF			12	1690.89	Lipids	50	1695.91	0.063183	3.99874	0.063183	11.3812	0.006883
UVRAG	96	109	SLDFGIMPDRLDTS			12	1566.75	Apo	0	1567.79	0.109968	0	0	12.6599	8.67441e-05
UVRAG	96	109	SLDFGIMPDRLDTS			12	1566.75	Apo	0.005	1568	0.144031	0.208846	0.181213	12.6731	0.00924
UVRAG	96	109	SLDFGIMPDRLDTS			12	1566.75	Apo	0.05	1568.09	0.152907	0.29922	0.188344	12.6686	0.003828
UVRAG	96	109	SLDFGIMPDRLDTS			12	1566.75	Apo	0.5	1568.39	0.12288	0.598273	0.164901	12.6727	0.006706
UVRAG	96	109	SLDFGIMPDRLDTS			12	1566.75	Apo	5	1568.65	0.083111	0.860373	0.137842	12.7057	0.020278
UVRAG	96	109	SLDFGIMPDRLDTS			12	1566.75	Apo	50	1568.78	0.162503	0.984928	0.196214	12.7273	0.006641
UVRAG	96	109	SLDFGIMPDRLDTS			12	1566.75	Lipids	0	1567.79	0.109968	0	0	12.6599	8.67441e-05
UVRAG	96	109	SLDFGIMPDRLDTS			12	1566.75	Lipids	0.005	1567.88	0.050155	0.089603	0.120866	12.6681	0.004041
UVRAG	96	109	SLDFGIMPDRLDTS			12	1566.75	Lipids	0.05	1568.11	0.156175	0.31786	0.191007	12.6777	0.01319
UVRAG	96	109	SLDFGIMPDRLDTS			12	1566.75	Lipids	0.5	1568.33	0.185286	0.533635	0.215462	12.6886	0.019211
UVRAG	96	109	SLDFGIMPDRLDTS			12	1566.75	Lipids	5	1568.6	0.130902	0.806193	0.170963	12.7138	0.004735
UVRAG	96	109	SLDFGIMPDRLDTS			12	1566.75	Lipids	50	1568.87	0.139206	1.08037	0.177402	12.7271	0.003153
UVRAG	99	106	FGIMPDRL			6	948.497	Apo	0	949.145	0.022129	0	0	11.4178	9.12253e-05
UVRAG	99	106	FGIMPDRL			6	948.497	Apo	0.005	950.276	0.012615	1.13106	0.025472	11.4301	0.000744
UVRAG	99	106	FGIMPDRL			6	948.497	Apo	0.05	951.237	0.004996	2.09217	0.022686	11.4353	0.000816
UVRAG	99	106	FGIMPDRL			6	948.497	Apo	0.5	951.442	0.077798	2.29725	0.080884	11.4349	0.024349
UVRAG	99	106	FGIMPDRL			6	948.497	Apo	5	951.467	0.01813	2.32289	0.028608	11.4821	0.011856
UVRAG	99	106	FGIMPDRL			6	948.497	Apo	50	951.428	0.028507	2.28375	0.036088	11.5035	3.46248e-05
UVRAG	99	106	FGIMPDRL			6	948.497	Lipids	0	949.145	0.022129	0	0	11.4178	9.12253e-05
UVRAG	99	106	FGIMPDRL			6	948.497	Lipids	0.005	950.239	0.053708	1.09453	0.058088	11.445	0.012908
UVRAG	99	106	FGIMPDRL			6	948.497	Lipids	0.05	951.229	0.044027	2.08403	0.049275	11.4505	0.004952
UVRAG	99	106	FGIMPDRL			6	948.497	Lipids	0.5	951.418	0.037816	2.2734	0.043815	11.4623	0.003702
UVRAG	99	106	FGIMPDRL			6	948.497	Lipids	5	951.501	0.077048	2.35667	0.080163	11.4889	0.00574
UVRAG	99	106	FGIMPDRL			6	948.497	Lipids	50	951.492	0.062964	2.34797	0.06674	11.5034	0.005708
UVRAG	100	112	GIMPDRLDTSVSC			11	1393.64	Apo	0	1394.39	0	0	0	9.73361	0
UVRAG	100	112	GIMPDRLDTSVSC			11	1393.64	Apo	0.005	1396.5	0.028788	2.11125	0.028788	9.744	0.01165
UVRAG	100	112	GIMPDRLDTSVSC			11	1393.64	Apo	0.05	1397.82	0.085155	3.42439	0.085155	9.74478	0.004741
UVRAG	100	112	GIMPDRLDTSVSC			11	1393.64	Apo	0.5	1398.6	0.166406	4.21055	0.166406	9.7482	0.00756
UVRAG	100	112	GIMPDRLDTSVSC			11	1393.64	Apo	5	1399.34	0.098512	4.94981	0.098512	9.77167	0.00904
UVRAG	100	112	GIMPDRLDTSVSC			11	1393.64	Apo	50	1399.54	0.099832	5.14943	0.099832	9.77942	0.002672
UVRAG	100	112	GIMPDRLDTSVSC			11	1393.64	Lipids	0	1394.39	0	0	0	9.73361	0
UVRAG	100	112	GIMPDRLDTSVSC			11	1393.64	Lipids	0.005	1396.47	0.018198	2.07557	0.018198	9.76013	0.011521
UVRAG	100	112	GIMPDRLDTSVSC			11	1393.64	Lipids	0.05	1397.75	0.110112	3.35273	0.110112	9.76012	0.007308
UVRAG	100	112	GIMPDRLDTSVSC			11	1393.64	Lipids	0.5	1398.57	0.237836	4.17153	0.237836	9.76108	0.004514
UVRAG	100	112	GIMPDRLDTSVSC			11	1393.64	Lipids	5	1399.38	0.049672	4.99035	0.049672	9.77774	0.002115
UVRAG	100	112	GIMPDRLDTSVSC			11	1393.64	Lipids	50	1399.58	0.074983	5.184	0.074983	9.78725	0.000892
UVRAG	107	113	DTSVSCF			6	758.303	Apo	0	758.667	0	0	0	10.3689	0
UVRAG	107	113	DTSVSCF			6	758.303	Apo	0.005	759.131	0.008749	0.463727	0.008749	10.3879	0.008511
UVRAG	107	113	DTSVSCF			6	758.303	Apo	0.05	759.442	0.011948	0.775515	0.011948	10.3766	0.004764
UVRAG	107	113	DTSVSCF			6	758.303	Apo	0.5	759.854	0.015484	1.18676	0.015484	10.3784	0.006687
UVRAG	107	113	DTSVSCF			6	758.303	Apo	5	760.563	0.007041	1.8962	0.007041	10.395	0.004084
UVRAG	107	113	DTSVSCF			6	758.303	Apo	50	760.793	0.022249	2.12599	0.022249	10.3974	0.000108
UVRAG	107	113	DTSVSCF			6	758.303	Lipids	0	758.667	0	0	0	10.3689	0
UVRAG	107	113	DTSVSCF			6	758.303	Lipids	0.005	759.083	0.011943	0.416322	0.011943	10.3874	0.008004
UVRAG	107	113	DTSVSCF			6	758.303	Lipids	0.05	759.449	0.019807	0.782323	0.019807	10.3871	0.003454
UVRAG	107	113	DTSVSCF			6	758.303	Lipids	0.5	759.904	0.005304	1.23745	0.005304	10.3902	0.005285
UVRAG	107	113	DTSVSCF			6	758.303	Lipids	5	760.609	0.038053	1.94254	0.038053	10.4	0.004433
UVRAG	107	113	DTSVSCF			6	758.303	Lipids	50	760.8	0.026673	2.13335	0.026673	10.3991	0.001361
UVRAG	112	130	CFVVKIWGGKENIYQLLIE			18	2252.21	Apo	0	2253.51	0.007445	0	0	12.6815	0.002374
UVRAG	112	130	CFVVKIWGGKENIYQLLIE			18	2252.21	Apo	0.005	2255.57	0.052865	2.06063	0.053386	12.6951	0.01262
UVRAG	112	130	CFVVKIWGGKENIYQLLIE			18	2252.21	Apo	0.05	2255.89	0.050902	2.37563	0.051444	12.6853	0.002578
UVRAG	112	130	CFVVKIWGGKENIYQLLIE			18	2252.21	Apo	0.5	2255.97	0.031144	2.45967	0.032021	12.6863	0.006984
UVRAG	112	130	CFVVKIWGGKENIYQLLIE			18	2252.21	Apo	5	2256.45	0.035042	2.93227	0.035824	12.7101	0.020409
UVRAG	112	130	CFVVKIWGGKENIYQLLIE			18	2252.21	Apo	50	2257.17	0.064279	3.66108	0.064709	12.7254	0.005782
UVRAG	112	130	CFVVKIWGGKENIYQLLIE			18	2252.21	Lipids	0	2253.51	0.007445	0	0	12.6815	0.002374
UVRAG	112	130	CFVVKIWGGKENIYQLLIE			18	2252.21	Lipids	0.005	2255.54	0.040304	2.03043	0.040986	12.6951	0.008407
UVRAG	112	130	CFVVKIWGGKENIYQLLIE			18	2252.21	Lipids	0.05	2255.9	0.056021	2.38347	0.056514	12.6902	0.010779
UVRAG	112	130	CFVVKIWGGKENIYQLLIE			18	2252.21	Lipids	0.5	2256.06	0.080454	2.54185	0.080798	12.7002	0.021726
UVRAG	112	130	CFVVKIWGGKENIYQLLIE			18	2252.21	Lipids	5	2256.39	0.042268	2.87537	0.042918	12.7192	0.00455
UVRAG	112	130	CFVVKIWGGKENIYQLLIE			18	2252.21	Lipids	50	2257.19	0.079829	3.67266	0.080175	12.7307	0.004345
UVRAG	113	127	FVVKIWGGKENIYQL			14	1793.99	Apo	0	1794.94	0.010798	0	0	11.7026	0.003558
UVRAG	113	127	FVVKIWGGKENIYQL			14	1793.99	Apo	0.005	1795.81	0.055284	0.869242	0.056329	11.7261	0.017968
UVRAG	113	127	FVVKIWGGKENIYQL			14	1793.99	Apo	0.05	1796.7	0.006504	1.75202	0.012606	11.7227	0.004185
UVRAG	113	127	FVVKIWGGKENIYQL			14	1793.99	Apo	0.5	1797.66	0.031621	2.71452	0.033414	11.7297	0.002624
UVRAG	113	127	FVVKIWGGKENIYQL			14	1793.99	Apo	5	1797.93	0.118281	2.98699	0.118773	11.775	0.032912
UVRAG	113	127	FVVKIWGGKENIYQL			14	1793.99	Apo	50	1798.11	0.060019	3.16394	0.060982	11.8204	0.003526
UVRAG	113	127	FVVKIWGGKENIYQL			14	1793.99	Lipids	0	1794.94	0.010798	0	0	11.7026	0.003558
UVRAG	113	127	FVVKIWGGKENIYQL			14	1793.99	Lipids	0.005	1795.76	0.059933	0.817671	0.060898	11.7304	0.011024
UVRAG	113	127	FVVKIWGGKENIYQL			14	1793.99	Lipids	0.05	1796.61	0.027057	1.66534	0.029132	11.7344	0.011001
UVRAG	113	127	FVVKIWGGKENIYQL			14	1793.99	Lipids	0.5	1797.69	0.108406	2.75053	0.108942	11.7496	0.005744
UVRAG	113	127	FVVKIWGGKENIYQL			14	1793.99	Lipids	5	1798.05	0.079037	3.10937	0.079771	11.7989	0.004877
UVRAG	113	127	FVVKIWGGKENIYQL			14	1793.99	Lipids	50	1798.16	0.054637	3.21962	0.055694	11.8303	0.010637
UVRAG	114	124	VVKIWGGKENI			10	1242.72	Apo	0	1243.36	0.088268	0	0	9.1732	0.000448
UVRAG	114	124	VVKIWGGKENI			10	1242.72	Apo	0.005	1244.18	0.016262	0.828208	0.089753	9.20045	0.017146
UVRAG	114	124	VVKIWGGKENI			10	1242.72	Apo	0.05	1244.54	0.044828	1.17958	0.098999	9.20945	0.001753
UVRAG	114	124	VVKIWGGKENI			10	1242.72	Apo	0.5	1244.99	0.070669	1.63735	0.113072	9.21728	0.002529
UVRAG	114	124	VVKIWGGKENI			10	1242.72	Apo	5	1245.24	0.040786	1.88614	0.097235	9.24431	0.012441
UVRAG	114	124	VVKIWGGKENI			10	1242.72	Apo	50	1245.24	0.024732	1.88509	0.091667	9.26084	0.002915
UVRAG	114	124	VVKIWGGKENI			10	1242.72	Lipids	0	1243.36	0.088268	0	0	9.1732	0.000448
UVRAG	114	124	VVKIWGGKENI			10	1242.72	Lipids	0.005	1244.12	0.106725	0.760966	0.138497	9.22185	0.014531
UVRAG	114	124	VVKIWGGKENI			10	1242.72	Lipids	0.05	1244.58	0.069426	1.22263	0.1123	9.23498	0.006266
UVRAG	114	124	VVKIWGGKENI			10	1242.72	Lipids	0.5	1245.06	0.056118	1.70167	0.104597	9.23825	0.004629
UVRAG	114	124	VVKIWGGKENI			10	1242.72	Lipids	5	1245.3	0.094646	1.93879	0.129418	9.26325	0.004342
UVRAG	114	124	VVKIWGGKENI			10	1242.72	Lipids	50	1245.31	0.044555	1.95338	0.098875	9.27509	0.002624
UVRAG	114	128	VVKIWGGKENIYQLL			14	1760.01	Apo	0	1760.99	0.011719	0	0	12.1201	0.002103
UVRAG	114	128	VVKIWGGKENIYQLL			14	1760.01	Apo	0.005	1761.81	0.074056	0.818567	0.074977	12.1327	0.01324
UVRAG	114	128	VVKIWGGKENIYQLL			14	1760.01	Apo	0.05	1762.67	0.046065	1.6747	0.047532	12.1304	0.00492
UVRAG	114	128	VVKIWGGKENIYQLL			14	1760.01	Apo	0.5	1763.88	0.045839	2.88581	0.047313	12.1393	0.008877
UVRAG	114	128	VVKIWGGKENIYQLL			14	1760.01	Apo	5	1764.22	0.03265	3.22763	0.034689	12.1859	0.018042
UVRAG	114	128	VVKIWGGKENIYQLL			14	1760.01	Apo	50	1764.42	0.054373	3.42978	0.055622	12.2276	0.016061
UVRAG	114	128	VVKIWGGKENIYQLL			14	1760.01	Lipids	0	1760.99	0.011719	0	0	12.1201	0.002103
UVRAG	114	128	VVKIWGGKENIYQLL			14	1760.01	Lipids	0.005	1761.83	0.069182	0.832813	0.070168	12.1412	0.019294
UVRAG	114	128	VVKIWGGKENIYQLL			14	1760.01	Lipids	0.05	1762.7	0.116899	1.70599	0.117485	12.1465	0.013932
UVRAG	114	128	VVKIWGGKENIYQLL			14	1760.01	Lipids	0.5	1763.89	0.066767	2.89573	0.067788	12.1616	0.012347
UVRAG	114	128	VVKIWGGKENIYQLL			14	1760.01	Lipids	5	1764.22	0.060069	3.23028	0.061201	12.1983	0.005786
UVRAG	114	128	VVKIWGGKENIYQLL			14	1760.01	Lipids	50	1764.49	0.034877	3.49792	0.036793	12.2416	0.013849
UVRAG	136	152	DGLKYLGQQIHARNQNE			16	1984	Apo	0	1985.05	0.047464	0	0	8.36965	0.001635
UVRAG	136	152	DGLKYLGQQIHARNQNE			16	1984	Apo	0.005	1987.81	0.040406	2.75767	0.062333	8.37099	0.016167
UVRAG	136	152	DGLKYLGQQIHARNQNE			16	1984	Apo	0.05	1989.38	0.043629	4.32298	0.064469	8.35832	0.005828
UVRAG	136	152	DGLKYLGQQIHARNQNE			16	1984	Apo	0.5	1989.72	0.041617	4.66587	0.063125	8.36754	0.00529
UVRAG	136	152	DGLKYLGQQIHARNQNE			16	1984	Apo	5	1990.07	0.032813	5.01536	0.057702	8.39221	0.007055
UVRAG	136	152	DGLKYLGQQIHARNQNE			16	1984	Apo	50	1990.85	0.058767	5.79381	0.075541	8.39595	0.004532
UVRAG	136	152	DGLKYLGQQIHARNQNE			16	1984	Lipids	0	1985.05	0.047464	0	0	8.36965	0.001635
UVRAG	136	152	DGLKYLGQQIHARNQNE			16	1984	Lipids	0.005	1987.79	0.103529	2.73952	0.113891	8.38192	0.006418
UVRAG	136	152	DGLKYLGQQIHARNQNE			16	1984	Lipids	0.05	1989.43	0.082956	4.37403	0.095575	8.37635	0.004652
UVRAG	136	152	DGLKYLGQQIHARNQNE			16	1984	Lipids	0.5	1989.86	0.045663	4.80049	0.065863	8.38761	0.005719
UVRAG	136	152	DGLKYLGQQIHARNQNE			16	1984	Lipids	5	1990.21	0.139574	5.15785	0.147423	8.4002	0.001563
UVRAG	136	152	DGLKYLGQQIHARNQNE			16	1984	Lipids	50	1990.94	0.035656	5.88455	0.059365	8.40797	0.00657
UVRAG	139	152	KYLGQQIHARNQNE			13	1698.87	Apo	0	1699.8	0	0	0	5.83222	0
UVRAG	139	152	KYLGQQIHARNQNE			13	1698.87	Apo	0.005	1701.63	0.012666	1.83258	0.012666	5.85302	0.008698
UVRAG	139	152	KYLGQQIHARNQNE			13	1698.87	Apo	0.05	1702.7	0.095467	2.90202	0.095467	5.85002	0.002657
UVRAG	139	152	KYLGQQIHARNQNE			13	1698.87	Apo	0.5	1702.93	0.091746	3.13265	0.091746	5.85286	0.005971
UVRAG	139	152	KYLGQQIHARNQNE			13	1698.87	Apo	5	1703.25	0.012224	3.45266	0.012224	5.86718	0.009982
UVRAG	139	152	KYLGQQIHARNQNE			13	1698.87	Apo	50	1703.58	0.181147	3.78503	0.181147	5.87361	0.003686
UVRAG	139	152	KYLGQQIHARNQNE			13	1698.87	Lipids	0	1699.8	0	0	0	5.83222	0
UVRAG	139	152	KYLGQQIHARNQNE			13	1698.87	Lipids	0.005	1701.47	0.215032	1.67571	0.215032	5.85069	0.007115
UVRAG	139	152	KYLGQQIHARNQNE			13	1698.87	Lipids	0.05	1702.77	0.087389	2.96995	0.087389	5.85896	0.005332
UVRAG	139	152	KYLGQQIHARNQNE			13	1698.87	Lipids	0.5	1703.04	0.113366	3.23918	0.113366	5.86683	0.007222
UVRAG	139	152	KYLGQQIHARNQNE			13	1698.87	Lipids	5	1703.36	0.021278	3.56541	0.021278	5.87688	0.00236
UVRAG	139	152	KYLGQQIHARNQNE			13	1698.87	Lipids	50	1703.87	0.060792	4.07785	0.060792	5.88244	0.005121
UVRAG	141	159	LGQQIHARNQNEIIFGLND			18	2180.12	Apo	0	2181.35	0.115384	0	0	7.14438	0.007153
UVRAG	141	159	LGQQIHARNQNEIIFGLND			18	2180.12	Apo	0.005	2181.98	0.147594	0.6368	0.187343	7.15717	0.008431
UVRAG	141	159	LGQQIHARNQNEIIFGLND			18	2180.12	Apo	0.05	2182.14	0.021674	0.796176	0.117402	7.15827	0.005026
UVRAG	141	159	LGQQIHARNQNEIIFGLND			18	2180.12	Apo	0.5	2182.38	0.037832	1.0374	0.121427	7.16842	0.003307
UVRAG	141	159	LGQQIHARNQNEIIFGLND			18	2180.12	Apo	5	2182.93	0.04441	1.58527	0.123635	7.18166	0.004837
UVRAG	141	159	LGQQIHARNQNEIIFGLND			18	2180.12	Apo	50	2183.98	0.085736	2.63402	0.14375	7.19544	0.003612
UVRAG	141	159	LGQQIHARNQNEIIFGLND			18	2180.12	Lipids	0	2181.35	0.115384	0	0	7.14438	0.007153
UVRAG	141	159	LGQQIHARNQNEIIFGLND			18	2180.12	Lipids	0.005	2181.96	0.07662	0.612913	0.138506	7.16254	0.005884
UVRAG	141	159	LGQQIHARNQNEIIFGLND			18	2180.12	Lipids	0.05	2182.24	0.102197	0.898717	0.154135	7.21109	0.052593
UVRAG	141	159	LGQQIHARNQNEIIFGLND			18	2180.12	Lipids	0.5	2182.47	0.047154	1.12269	0.124647	7.18417	0.004575
UVRAG	141	159	LGQQIHARNQNEIIFGLND			18	2180.12	Lipids	5	2182.94	0.019429	1.59478	0.117008	7.18736	0.005589
UVRAG	141	159	LGQQIHARNQNEIIFGLND			18	2180.12	Lipids	50	2184.11	0.033222	2.76686	0.120071	7.203	0.005222
UVRAG	152	163	EIIFGLNDGYYG			11	1360.64	Apo	0	1361.5	0	0	0	11.646	0
UVRAG	152	163	EIIFGLNDGYYG			11	1360.64	Apo	0.005	1363.34	0	1.84241	0	11.6612	0
UVRAG	152	163	EIIFGLNDGYYG			11	1360.64	Apo	0.05	1363.57	0.083216	2.07575	0.083216	11.6593	0.000241
UVRAG	152	163	EIIFGLNDGYYG			11	1360.64	Apo	0.5	1363.71	0.089395	2.20992	0.089395	11.6684	0.007045
UVRAG	152	163	EIIFGLNDGYYG			11	1360.64	Apo	5	1363.9	0.046538	2.40256	0.046538	11.6999	0.014677
UVRAG	152	163	EIIFGLNDGYYG			11	1360.64	Apo	50	1364.01	0.035021	2.50758	0.035021	11.7175	0.005007
UVRAG	152	163	EIIFGLNDGYYG			11	1360.64	Lipids	0	1361.5	0	0	0	11.646	0
UVRAG	152	163	EIIFGLNDGYYG			11	1360.64	Lipids	0.005	1363.35	0.050718	1.8556	0.050718	11.6713	0.011084
UVRAG	152	163	EIIFGLNDGYYG			11	1360.64	Lipids	0.05	1363.75	0	2.25447	0	11.6834	0
UVRAG	152	163	EIIFGLNDGYYG			11	1360.64	Lipids	0.5	1363.76	0.036977	2.2573	0.036977	11.684	0.004201
UVRAG	152	163	EIIFGLNDGYYG			11	1360.64	Lipids	5	1363.88	0.034527	2.38515	0.034527	11.7081	0.000456
UVRAG	152	163	EIIFGLNDGYYG			11	1360.64	Lipids	50	1364.07	0.028594	2.56971	0.028594	11.7222	0.00764
UVRAG	153	159	IIFGLND			6	791.43	Apo	0	791.863	0	0	0	11.7331	0
UVRAG	153	159	IIFGLND			6	791.43	Apo	0.005	792.436	0.023799	0.572959	0.023799	11.7457	0.005298
UVRAG	153	159	IIFGLND			6	791.43	Apo	0.05	792.652	0.019353	0.789584	0.019353	11.7436	0.002461
UVRAG	153	159	IIFGLND			6	791.43	Apo	0.5	792.622	0.015092	0.758817	0.015092	11.7395	0.00372
UVRAG	153	159	IIFGLND			6	791.43	Apo	5	792.678	0.025973	0.815681	0.025973	11.7649	0.010168
UVRAG	153	159	IIFGLND			6	791.43	Apo	50	792.687	0.021639	0.824006	0.021639	11.7766	0.003175
UVRAG	153	159	IIFGLND			6	791.43	Lipids	0	791.863	0	0	0	11.7331	0
UVRAG	153	159	IIFGLND			6	791.43	Lipids	0.005	792.46	0.016059	0.596893	0.016059	11.7502	0.007249
UVRAG	153	159	IIFGLND			6	791.43	Lipids	0.05	792.664	0.028151	0.801107	0.028151	11.7518	0.007789
UVRAG	153	159	IIFGLND			6	791.43	Lipids	0.5	792.688	0.065847	0.825375	0.065847	11.7556	0.006251
UVRAG	153	159	IIFGLND			6	791.43	Lipids	5	792.754	0.045085	0.891644	0.045085	11.7699	0.002252
UVRAG	153	159	IIFGLND			6	791.43	Lipids	50	792.705	0.053727	0.842259	0.053727	11.7773	0.003124
UVRAG	153	174	IIFGLNDGYYGAPFEHKGYSNA			20	2433.15	Apo	0	2434.41	4.54747e-13	0	0	11.4861	0
UVRAG	153	174	IIFGLNDGYYGAPFEHKGYSNA			20	2433.15	Apo	0.005	2437.6	0.030134	3.18963	0.030134	11.5007	0.01203
UVRAG	153	174	IIFGLNDGYYGAPFEHKGYSNA			20	2433.15	Apo	0.05	2437.9	0.032925	3.48962	0.032925	11.4986	0.003182
UVRAG	153	174	IIFGLNDGYYGAPFEHKGYSNA			20	2433.15	Apo	0.5	2438.29	0.119083	3.87392	0.119083	11.5037	0.004675
UVRAG	153	174	IIFGLNDGYYGAPFEHKGYSNA			20	2433.15	Apo	5	2438.84	0.05366	4.42557	0.05366	11.5411	0.017151
UVRAG	153	174	IIFGLNDGYYGAPFEHKGYSNA			20	2433.15	Apo	50	2439.13	0.05309	4.71372	0.05309	11.5697	0.009582
UVRAG	153	174	IIFGLNDGYYGAPFEHKGYSNA			20	2433.15	Lipids	0	2434.41	4.54747e-13	0	0	11.4861	0
UVRAG	153	174	IIFGLNDGYYGAPFEHKGYSNA			20	2433.15	Lipids	0.005	2437.67	0.094708	3.25807	0.094708	11.5099	0.013714
UVRAG	153	174	IIFGLNDGYYGAPFEHKGYSNA			20	2433.15	Lipids	0.05	2438.02	0.183602	3.61104	0.183602	11.5223	0.010607
UVRAG	153	174	IIFGLNDGYYGAPFEHKGYSNA			20	2433.15	Lipids	0.5	2438.49	0.090632	4.07368	0.090632	11.5268	0.006242
UVRAG	153	174	IIFGLNDGYYGAPFEHKGYSNA			20	2433.15	Lipids	5	2438.93	0.092256	4.51728	0.092256	11.5603	0.002984
UVRAG	153	174	IIFGLNDGYYGAPFEHKGYSNA			20	2433.15	Lipids	50	2439.28	0.083953	4.87195	0.083953	11.5844	0.008439
UVRAG	156	172	GLNDGYYGAPFEHKGYS			15	1874.83	Apo	0	1875.9	0	0	0	7.22325	0
UVRAG	156	172	GLNDGYYGAPFEHKGYS			15	1874.83	Apo	0.005	1878.36	0.003054	2.46544	0.003054	7.24249	0.018484
UVRAG	156	172	GLNDGYYGAPFEHKGYS			15	1874.83	Apo	0.05	1878.94	0.094235	3.04422	0.094235	7.24503	0.005985
UVRAG	156	172	GLNDGYYGAPFEHKGYS			15	1874.83	Apo	0.5	1879.32	0.048266	3.42748	0.048266	7.24758	0.007144
UVRAG	156	172	GLNDGYYGAPFEHKGYS			15	1874.83	Apo	5	1880.09	0.03222	4.19007	0.03222	7.26513	0.006901
UVRAG	156	172	GLNDGYYGAPFEHKGYS			15	1874.83	Apo	50	1880.59	0.090558	4.69305	0.090558	7.27439	0.00336
UVRAG	156	172	GLNDGYYGAPFEHKGYS			15	1874.83	Lipids	0	1875.9	0	0	0	7.22325	0
UVRAG	156	172	GLNDGYYGAPFEHKGYS			15	1874.83	Lipids	0.005	1878.38	0.121381	2.4831	0.121381	7.25678	0.005035
UVRAG	156	172	GLNDGYYGAPFEHKGYS			15	1874.83	Lipids	0.05	1879.1	0	3.20668	0	7.27588	0
UVRAG	156	172	GLNDGYYGAPFEHKGYS			15	1874.83	Lipids	0.5	1879.28	0.035896	3.38362	0.035896	7.26626	0.010421
UVRAG	156	172	GLNDGYYGAPFEHKGYS			15	1874.83	Lipids	5	1880.05	0.154395	4.15127	0.154395	7.2766	0.004899
UVRAG	156	172	GLNDGYYGAPFEHKGYS			15	1874.83	Lipids	50	1880.39	0.235837	4.49375	0.235837	7.28193	0.004627
UVRAG	166	184	FEHKGYSNAQKTILLQVDQ			18	2219.15	Apo	0	2220.53	0.141425	0	0	5.46864	0.003578
UVRAG	166	184	FEHKGYSNAQKTILLQVDQ			18	2219.15	Apo	0.005	2221.81	0.084194	1.28088	0.164589	5.48747	0.013537
UVRAG	166	184	FEHKGYSNAQKTILLQVDQ			18	2219.15	Apo	0.05	2222.16	0.034556	1.6297	0.145585	5.49719	0.004414
UVRAG	166	184	FEHKGYSNAQKTILLQVDQ			18	2219.15	Apo	0.5	2222.36	0.04757	1.82932	0.149211	5.50021	0.006515
UVRAG	166	184	FEHKGYSNAQKTILLQVDQ			18	2219.15	Apo	5	2222.5	0.086787	1.97596	0.16593	5.53052	0.007953
UVRAG	166	184	FEHKGYSNAQKTILLQVDQ			18	2219.15	Apo	50	2222.66	0.109065	2.13142	0.178595	5.55093	0.010442
UVRAG	166	184	FEHKGYSNAQKTILLQVDQ			18	2219.15	Lipids	0	2220.53	0.141425	0	0	5.46864	0.003578
UVRAG	166	184	FEHKGYSNAQKTILLQVDQ			18	2219.15	Lipids	0.005	2221.9	0.097628	1.37285	0.171849	5.49961	0.011833
UVRAG	166	184	FEHKGYSNAQKTILLQVDQ			18	2219.15	Lipids	0.05	2222.09	0.031267	1.56569	0.14484	5.50413	0.008176
UVRAG	166	184	FEHKGYSNAQKTILLQVDQ			18	2219.15	Lipids	0.5	2222.45	0.067824	1.9206	0.156847	5.53212	0.00563
UVRAG	166	184	FEHKGYSNAQKTILLQVDQ			18	2219.15	Lipids	5	2222.5	0.048585	1.97569	0.149537	5.56149	0.012893
UVRAG	166	184	FEHKGYSNAQKTILLQVDQ			18	2219.15	Lipids	50	2222.73	0.067692	2.19744	0.15679	5.58387	0.007895
UVRAG	180	186	LQVDQNC			6	819.366	Apo	0	819.758	0	0	0	7.35053	0
UVRAG	180	186	LQVDQNC			6	819.366	Apo	0.005	821.624	0.02873	1.86627	0.02873	7.35457	0.010226
UVRAG	180	186	LQVDQNC			6	819.366	Apo	0.05	822.393	0.027727	2.63467	0.027727	7.35335	0.004396
UVRAG	180	186	LQVDQNC			6	819.366	Apo	0.5	822.525	0.016534	2.76756	0.016534	7.35382	0.003686
UVRAG	180	186	LQVDQNC			6	819.366	Apo	5	822.528	0.029162	2.77048	0.029162	7.36506	0.004259
UVRAG	180	186	LQVDQNC			6	819.366	Apo	50	822.533	0.032081	2.7755	0.032081	7.36878	0.001357
UVRAG	180	186	LQVDQNC			6	819.366	Lipids	0	819.758	0	0	0	7.35053	0
UVRAG	180	186	LQVDQNC			6	819.366	Lipids	0.005	821.57	0.028287	1.81246	0.028287	7.36308	0.000524
UVRAG	180	186	LQVDQNC			6	819.366	Lipids	0.05	822.424	0.028965	2.66587	0.028965	7.36087	0.00396
UVRAG	180	186	LQVDQNC			6	819.366	Lipids	0.5	822.557	0.021304	2.79931	0.021304	7.36375	0.008203
UVRAG	180	186	LQVDQNC			6	819.366	Lipids	5	822.6	0.053176	2.84213	0.053176	7.37124	0.003552
UVRAG	180	186	LQVDQNC			6	819.366	Lipids	50	822.599	0.03022	2.84123	0.03022	7.36907	0.001284
UVRAG	181	194	QVDQNCVRNSYDVF			13	1686.75	Apo	0	1687.69	0	0	0	10.6747	0
UVRAG	181	194	QVDQNCVRNSYDVF			13	1686.75	Apo	0.005	1689.54	0.040212	1.85207	0.040212	10.7074	0.009786
UVRAG	181	194	QVDQNCVRNSYDVF			13	1686.75	Apo	0.05	1690.45	0.021858	2.76076	0.021858	10.6936	0.004706
UVRAG	181	194	QVDQNCVRNSYDVF			13	1686.75	Apo	0.5	1690.84	0.073029	3.15138	0.073029	10.7016	0.006441
UVRAG	181	194	QVDQNCVRNSYDVF			13	1686.75	Apo	5	1691.7	0.080791	4.01252	0.080791	10.7363	0.016168
UVRAG	181	194	QVDQNCVRNSYDVF			13	1686.75	Apo	50	1692.51	0.059509	4.82163	0.059509	10.7376	0.001108
UVRAG	181	194	QVDQNCVRNSYDVF			13	1686.75	Lipids	0	1687.69	0	0	0	10.6747	0
UVRAG	181	194	QVDQNCVRNSYDVF			13	1686.75	Lipids	0.005	1689.55	0.05469	1.85563	0.05469	10.7043	0.003003
UVRAG	181	194	QVDQNCVRNSYDVF			13	1686.75	Lipids	0.05	1690.55	0	2.85802	0	10.7244	0
UVRAG	181	194	QVDQNCVRNSYDVF			13	1686.75	Lipids	0.5	1690.99	0	3.30014	0	10.7213	0
UVRAG	181	194	QVDQNCVRNSYDVF			13	1686.75	Lipids	5	1691.76	0	4.06774	0	10.7367	0
UVRAG	181	194	QVDQNCVRNSYDVF			13	1686.75	Lipids	50	1692.61	0	4.91832	0	10.7445	0
UVRAG	195	204	SLLRLHRAQC			9	1196.67	Apo	0	1197.11	0.029017	0	0	7.05052	0.002134
UVRAG	195	204	SLLRLHRAQC			9	1196.67	Apo	0.005	1197.53	0.11482	0.419786	0.11843	7.09663	0.015348
UVRAG	195	204	SLLRLHRAQC			9	1196.67	Apo	0.05	1197.5	0.086773	0.384602	0.091496	7.09538	0.004767
UVRAG	195	204	SLLRLHRAQC			9	1196.67	Apo	0.5	1197.45	0.086772	0.33498	0.091496	7.09767	0.006253
UVRAG	195	204	SLLRLHRAQC			9	1196.67	Apo	5	1197.58	0.102211	0.469689	0.10625	7.12978	0.006538
UVRAG	195	204	SLLRLHRAQC			9	1196.67	Apo	50	1197.9	0.098237	0.781128	0.102433	7.15021	0.006068
UVRAG	195	204	SLLRLHRAQC			9	1196.67	Lipids	0	1197.11	0.029017	0	0	7.05052	0.002134
UVRAG	195	204	SLLRLHRAQC			9	1196.67	Lipids	0.005	1197.56	0.040442	0.444323	0.049775	7.10214	0.008001
UVRAG	195	204	SLLRLHRAQC			9	1196.67	Lipids	0.05	1197.6	0.092849	0.481896	0.097278	7.11972	0.015771
UVRAG	195	204	SLLRLHRAQC			9	1196.67	Lipids	0.5	1197.58	0.10096	0.463904	0.105047	7.12573	0.007779
UVRAG	195	204	SLLRLHRAQC			9	1196.67	Lipids	5	1197.73	0.052391	0.613724	0.05989	7.15188	0.003468
UVRAG	195	204	SLLRLHRAQC			9	1196.67	Lipids	50	1197.91	0.080746	0.791854	0.085802	7.17361	0.006264
UVRAG	195	205	SLLRLHRAQCA			10	1267.71	Apo	0	1268.24	0.074326	0	0	6.98409	0.002878
UVRAG	195	205	SLLRLHRAQCA			10	1267.71	Apo	0.005	1268.62	0.086389	0.377656	0.113962	7.00884	0.015197
UVRAG	195	205	SLLRLHRAQCA			10	1267.71	Apo	0.05	1268.86	0.266274	0.617124	0.276453	7.01262	0.003653
UVRAG	195	205	SLLRLHRAQCA			10	1267.71	Apo	0.5	1268.67	0.03307	0.435903	0.081351	7.0207	0.005586
UVRAG	195	205	SLLRLHRAQCA			10	1267.71	Apo	5	1268.79	0.065711	0.555459	0.099209	7.05028	0.008751
UVRAG	195	205	SLLRLHRAQCA			10	1267.71	Apo	50	1269.3	0.038957	1.06338	0.083917	7.07051	0.003724
UVRAG	195	205	SLLRLHRAQCA			10	1267.71	Lipids	0	1268.24	0.074326	0	0	6.98409	0.002878
UVRAG	195	205	SLLRLHRAQCA			10	1267.71	Lipids	0.005	1268.65	0.160201	0.40867	0.176603	7.02343	0.006304
UVRAG	195	205	SLLRLHRAQCA			10	1267.71	Lipids	0.05	1268.71	0.036304	0.470445	0.082719	7.02472	0.001016
UVRAG	195	205	SLLRLHRAQCA			10	1267.71	Lipids	0.5	1268.71	0.024189	0.46773	0.078163	7.04485	0.002863
UVRAG	195	205	SLLRLHRAQCA			10	1267.71	Lipids	5	1268.82	0.082047	0.584932	0.110707	7.06391	0.005464
UVRAG	195	205	SLLRLHRAQCA			10	1267.71	Lipids	50	1269.33	0.073028	1.0892	0.104199	7.08583	0.004422
UVRAG	197	204	LRLHRAQC			7	996.552	Apo	0	997.03	0.01629	0	0	5.42701	0.000613
UVRAG	197	204	LRLHRAQC			7	996.552	Apo	0.005	997.216	0.068878	0.186597	0.070778	5.43393	0.007462
UVRAG	197	204	LRLHRAQC			7	996.552	Apo	0.05	997.241	0.049185	0.211455	0.051813	5.44166	0.002232
UVRAG	197	204	LRLHRAQC			7	996.552	Apo	0.5	997.261	0.022621	0.231516	0.027876	5.44418	0.004581
UVRAG	197	204	LRLHRAQC			7	996.552	Apo	5	997.311	0.030527	0.281408	0.034601	5.46417	0.008366
UVRAG	197	204	LRLHRAQC			7	996.552	Apo	50	997.552	0.031419	0.522098	0.035391	5.47373	0.00328
UVRAG	197	204	LRLHRAQC			7	996.552	Lipids	0	997.03	0.01629	0	0	5.42701	0.000613
UVRAG	197	204	LRLHRAQC			7	996.552	Lipids	0.005	997.302	0.068256	0.272656	0.070173	5.43968	0.005792
UVRAG	197	204	LRLHRAQC			7	996.552	Lipids	0.05	997.348	0.036523	0.318414	0.039991	5.45396	0.010288
UVRAG	197	204	LRLHRAQC			7	996.552	Lipids	0.5	997.309	0.059851	0.279694	0.062028	5.45704	0.007634
UVRAG	197	204	LRLHRAQC			7	996.552	Lipids	5	997.346	0.04485	0.316672	0.047717	5.47641	0.004237
UVRAG	197	204	LRLHRAQC			7	996.552	Lipids	50	997.501	0.038694	0.471771	0.041983	5.48736	0.003807
UVRAG	198	204	RLHRAQC			6	883.468	Apo	0	883.935	1.13687e-13	0	0	4.44144	0
UVRAG	198	204	RLHRAQC			6	883.468	Apo	0.005	884.191	0.067653	0.255969	0.067653	4.45021	0.007008
UVRAG	198	204	RLHRAQC			6	883.468	Apo	0.05	884.118	0.087257	0.18355	0.087257	4.45817	0.006055
UVRAG	198	204	RLHRAQC			6	883.468	Apo	0.5	884.08	0.080837	0.144876	0.080837	4.4604	0.009177
UVRAG	198	204	RLHRAQC			6	883.468	Apo	5	884.129	0.064867	0.193856	0.064867	4.47518	0.005953
UVRAG	198	204	RLHRAQC			6	883.468	Apo	50	884.336	0.002742	0.401407	0.002742	4.48142	0.001141
UVRAG	198	204	RLHRAQC			6	883.468	Lipids	0	883.935	1.13687e-13	0	0	4.44144	0
UVRAG	198	204	RLHRAQC			6	883.468	Lipids	0.005	884.159	0.074371	0.223956	0.074371	4.45287	0.006876
UVRAG	198	204	RLHRAQC			6	883.468	Lipids	0.05	884.152	0.053554	0.217323	0.053554	4.46576	0.007721
UVRAG	198	204	RLHRAQC			6	883.468	Lipids	0.5	884.095	0.022195	0.160308	0.022195	4.4795	0.003939
UVRAG	198	204	RLHRAQC			6	883.468	Lipids	5	884.17	0.050349	0.234981	0.050349	4.48541	0.001011
UVRAG	198	204	RLHRAQC			6	883.468	Lipids	50	884.341	0.110902	0.406826	0.110902	4.48988	0.000972
UVRAG	200	212	HRAQCAIKQTQVT			12	1483.78	Apo	0	1484.53	0.024426	0	0	5.37852	0.007977
UVRAG	200	212	HRAQCAIKQTQVT			12	1483.78	Apo	0.005	1484.87	0.095562	0.342193	0.098635	5.38688	0.008132
UVRAG	200	212	HRAQCAIKQTQVT			12	1483.78	Apo	0.05	1485.06	0.069003	0.529857	0.073199	5.39383	0.001007
UVRAG	200	212	HRAQCAIKQTQVT			12	1483.78	Apo	0.5	1485.05	0.104913	0.520048	0.107719	5.39258	0.003504
UVRAG	200	212	HRAQCAIKQTQVT			12	1483.78	Apo	5	1485.7	0.126179	1.16968	0.128521	5.4054	0.007145
UVRAG	200	212	HRAQCAIKQTQVT			12	1483.78	Apo	50	1487.63	0.171589	3.09936	0.173319	5.40122	0.006601
UVRAG	200	212	HRAQCAIKQTQVT			12	1483.78	Lipids	0	1484.53	0.024426	0	0	5.37852	0.007977
UVRAG	200	212	HRAQCAIKQTQVT			12	1483.78	Lipids	0.005	1484.92	0.22914	0.390146	0.230438	5.39068	0.006754
UVRAG	200	212	HRAQCAIKQTQVT			12	1483.78	Lipids	0.05	1484.89	0.215625	0.361744	0.217004	5.39825	0.007239
UVRAG	200	212	HRAQCAIKQTQVT			12	1483.78	Lipids	0.5	1485.02	0.073434	0.489998	0.07739	5.40682	0.007057
UVRAG	200	212	HRAQCAIKQTQVT			12	1483.78	Lipids	5	1485.8	0	1.27005	0.024426	5.40827	0
UVRAG	200	212	HRAQCAIKQTQVT			12	1483.78	Lipids	50	1487.74	0.209033	3.20802	0.210455	5.40771	0.005404
UVRAG	205	214	AIKQTQVTVQ			9	1115.64	Apo	0	1116.15	0.036628	0	0	6.21276	0.005083
UVRAG	205	214	AIKQTQVTVQ			9	1115.64	Apo	0.005	1116.44	0.075396	0.293547	0.083822	6.22142	0.004569
UVRAG	205	214	AIKQTQVTVQ			9	1115.64	Apo	0.05	1116.47	0.095148	0.323878	0.101954	6.21652	0.003238
UVRAG	205	214	AIKQTQVTVQ			9	1115.64	Apo	0.5	1116.6	0.100961	0.450235	0.1074	6.21905	0.00503
UVRAG	205	214	AIKQTQVTVQ			9	1115.64	Apo	5	1117.28	0.032217	1.13327	0.04878	6.22407	0.002532
UVRAG	205	214	AIKQTQVTVQ			9	1115.64	Apo	50	1119.28	0.009354	3.12956	0.037803	6.23268	0.000698
UVRAG	205	214	AIKQTQVTVQ			9	1115.64	Lipids	0	1116.15	0.036628	0	0	6.21276	0.005083
UVRAG	205	214	AIKQTQVTVQ			9	1115.64	Lipids	0.005	1116.44	0.0729	0.289451	0.081584	6.21912	0.006493
UVRAG	205	214	AIKQTQVTVQ			9	1115.64	Lipids	0.05	1116.49	0.081294	0.348809	0.089164	6.22618	0.000345
UVRAG	205	214	AIKQTQVTVQ			9	1115.64	Lipids	0.5	1116.52	0	0.375149	0.036628	6.23688	0
UVRAG	205	214	AIKQTQVTVQ			9	1115.64	Lipids	5	1117.32	0.000461	1.17728	0.03663	6.2378	0.002521
UVRAG	205	214	AIKQTQVTVQ			9	1115.64	Lipids	50	1119.24	0.052234	3.09829	0.063796	6.23333	0.001944
UVRAG	205	222	AIKQTQVTVQKIGKEIEE			17	2042.15	Apo	0	2043.08	0.037599	0	0	8.42247	0.002088
UVRAG	205	222	AIKQTQVTVQKIGKEIEE			17	2042.15	Apo	0.005	2043.7	0.129737	0.621689	0.135076	8.43617	0.016055
UVRAG	205	222	AIKQTQVTVQKIGKEIEE			17	2042.15	Apo	0.05	2043.84	0.109878	0.760746	0.116133	8.43628	0.007619
UVRAG	205	222	AIKQTQVTVQKIGKEIEE			17	2042.15	Apo	0.5	2043.86	0.067928	0.781359	0.077639	8.44035	0.006709
UVRAG	205	222	AIKQTQVTVQKIGKEIEE			17	2042.15	Apo	5	2044.79	0.011818	1.70663	0.039413	8.45441	0.010608
UVRAG	205	222	AIKQTQVTVQKIGKEIEE			17	2042.15	Apo	50	2047.84	0.188032	4.7656	0.191754	8.44181	0.005644
UVRAG	205	222	AIKQTQVTVQKIGKEIEE			17	2042.15	Lipids	0	2043.08	0.037599	0	0	8.42247	0.002088
UVRAG	205	222	AIKQTQVTVQKIGKEIEE			17	2042.15	Lipids	0.005	2043.72	0.045944	0.641904	0.059368	8.44965	0.004291
UVRAG	205	222	AIKQTQVTVQKIGKEIEE			17	2042.15	Lipids	0.05	2043.89	0.035622	0.811888	0.051794	8.45194	0.005902
UVRAG	205	222	AIKQTQVTVQKIGKEIEE			17	2042.15	Lipids	0.5	2043.95	0.103514	0.868343	0.110131	8.45702	0.008455
UVRAG	205	222	AIKQTQVTVQKIGKEIEE			17	2042.15	Lipids	5	2044.82	0.130321	1.74439	0.135636	8.47199	0.007675
UVRAG	205	222	AIKQTQVTVQKIGKEIEE			17	2042.15	Lipids	50	2047.97	0.130441	4.88688	0.135752	8.448	0.00654
UVRAG	206	212	IKQTQVT			6	817.478	Apo	0	817.805	0.033666	0	0	5.22719	0.000748
UVRAG	206	212	IKQTQVT			6	817.478	Apo	0.005	818.012	0.069718	0.206786	0.077421	5.22471	0.003975
UVRAG	206	212	IKQTQVT			6	817.478	Apo	0.05	818.036	0.042761	0.231307	0.054424	5.22779	0.002939
UVRAG	206	212	IKQTQVT			6	817.478	Apo	0.5	818.12	0.046978	0.314876	0.057796	5.22637	0.004088
UVRAG	206	212	IKQTQVT			6	817.478	Apo	5	818.711	0.154718	0.905939	0.158339	5.23365	0.005934
UVRAG	206	212	IKQTQVT			6	817.478	Apo	50	820.069	0.161827	2.2641	0.165292	5.23701	0.001934
UVRAG	206	212	IKQTQVT			6	817.478	Lipids	0	817.805	0.033666	0	0	5.22719	0.000748
UVRAG	206	212	IKQTQVT			6	817.478	Lipids	0.005	818.016	0.055283	0.211307	0.064728	5.22486	0.001309
UVRAG	206	212	IKQTQVT			6	817.478	Lipids	0.05	818.084	0.074322	0.27946	0.081592	5.2301	0.005048
UVRAG	206	212	IKQTQVT			6	817.478	Lipids	0.5	818.13	0.105885	0.325279	0.111108	5.23652	0.004213
UVRAG	206	212	IKQTQVT			6	817.478	Lipids	5	818.649	0.122643	0.843912	0.12718	5.23656	0.002894
UVRAG	206	212	IKQTQVT			6	817.478	Lipids	50	820.106	0.140233	2.30086	0.144218	5.23566	0.00337
UVRAG	211	222	VTVQKIGKEIEE			11	1372.77	Apo	0	1373.49	0	0	0	6.51129	0
UVRAG	211	222	VTVQKIGKEIEE			11	1372.77	Apo	0.005	1374.3	0.034917	0.811805	0.034917	6.53968	0.011348
UVRAG	211	222	VTVQKIGKEIEE			11	1372.77	Apo	0.05	1374.94	0.022328	1.44594	0.022328	6.54474	0.005032
UVRAG	211	222	VTVQKIGKEIEE			11	1372.77	Apo	0.5	1375.35	0.0715	1.86183	0.0715	6.54454	0.006771
UVRAG	211	222	VTVQKIGKEIEE			11	1372.77	Apo	5	1375.78	0.032554	2.29244	0.032554	6.57099	0.014437
UVRAG	211	222	VTVQKIGKEIEE			11	1372.77	Apo	50	1376.02	0.144129	2.5325	0.144129	6.57827	0.006204
UVRAG	211	222	VTVQKIGKEIEE			11	1372.77	Lipids	0	1373.49	0	0	0	6.51129	0
UVRAG	211	222	VTVQKIGKEIEE			11	1372.77	Lipids	0.005	1374.36	0.061441	0.866872	0.061441	6.55338	0.010266
UVRAG	211	222	VTVQKIGKEIEE			11	1372.77	Lipids	0.05	1374.94	0.076917	1.44676	0.076917	6.55584	0.005699
UVRAG	211	222	VTVQKIGKEIEE			11	1372.77	Lipids	0.5	1375.32	0.031009	1.83174	0.031009	6.56833	0.007037
UVRAG	211	222	VTVQKIGKEIEE			11	1372.77	Lipids	5	1375.81	0.088842	2.31659	0.088842	6.58855	0.006715
UVRAG	211	222	VTVQKIGKEIEE			11	1372.77	Lipids	50	1376.16	0.030578	2.6729	0.030578	6.59662	0.003315
UVRAG	213	222	VQKIGKEIEE			9	1172.65	Apo	0	1173.32	0.071738	0	0	6.40103	0.001225
UVRAG	213	222	VQKIGKEIEE			9	1172.65	Apo	0.005	1173.58	0.067776	0.255104	0.098691	6.41385	0.004699
UVRAG	213	222	VQKIGKEIEE			9	1172.65	Apo	0.05	1173.51	0.052281	0.183832	0.088767	6.42137	0.003237
UVRAG	213	222	VQKIGKEIEE			9	1172.65	Apo	0.5	1173.47	0.110949	0.148074	0.132121	6.41926	0.007406
UVRAG	213	222	VQKIGKEIEE			9	1172.65	Apo	5	1173.84	0.073452	0.51557	0.102671	6.43646	0.006228
UVRAG	213	222	VQKIGKEIEE			9	1172.65	Apo	50	1174.69	0.04961	1.36562	0.087221	6.44281	0.002366
UVRAG	213	222	VQKIGKEIEE			9	1172.65	Lipids	0	1173.32	0.071738	0	0	6.40103	0.001225
UVRAG	213	222	VQKIGKEIEE			9	1172.65	Lipids	0.005	1173.6	0.065793	0.272678	0.09734	6.42478	0.007712
UVRAG	213	222	VQKIGKEIEE			9	1172.65	Lipids	0.05	1173.58	0.072941	0.2587	0.102306	6.43004	0.005387
UVRAG	213	222	VQKIGKEIEE			9	1172.65	Lipids	0.5	1173.56	0.085657	0.239729	0.111729	6.40198	0.04907
UVRAG	213	222	VQKIGKEIEE			9	1172.65	Lipids	5	1173.84	0.079305	0.513746	0.106937	6.44325	0.002557
UVRAG	213	222	VQKIGKEIEE			9	1172.65	Lipids	50	1174.74	0.02074	1.4206	0.074676	6.447	0.00384
UVRAG	223	232	KLRLTSTSNE			9	1148.63	Apo	0	1149.15	0	0	0	6.09499	0
UVRAG	223	232	KLRLTSTSNE			9	1148.63	Apo	0.005	1152.02	0.015161	2.87637	0.015161	6.10806	0.008547
UVRAG	223	232	KLRLTSTSNE			9	1148.63	Apo	0.05	1152.46	0.039278	3.31197	0.039278	6.10659	0.003667
UVRAG	223	232	KLRLTSTSNE			9	1148.63	Apo	0.5	1152.56	0.088446	3.41073	0.088446	6.10704	0.005865
UVRAG	223	232	KLRLTSTSNE			9	1148.63	Apo	5	1152.91	0.003211	3.7641	0.003211	6.12296	0.010208
UVRAG	223	232	KLRLTSTSNE			9	1148.63	Apo	50	1152.93	0.06213	3.78235	0.06213	6.13442	0.00304
UVRAG	223	232	KLRLTSTSNE			9	1148.63	Lipids	0	1149.15	0	0	0	6.09499	0
UVRAG	223	232	KLRLTSTSNE			9	1148.63	Lipids	0.005	1151.94	0.139846	2.78763	0.139846	6.11477	0.003259
UVRAG	223	232	KLRLTSTSNE			9	1148.63	Lipids	0.05	1152.48	0.081622	3.32893	0.081622	6.11545	0.006927
UVRAG	223	232	KLRLTSTSNE			9	1148.63	Lipids	0.5	1152.61	0.094032	3.45833	0.094032	6.12194	0.008701
UVRAG	223	232	KLRLTSTSNE			9	1148.63	Lipids	5	1153.03	0.039594	3.88534	0.039594	6.13494	0.001985
UVRAG	223	232	KLRLTSTSNE			9	1148.63	Lipids	50	1153.01	0.059867	3.85958	0.059867	6.14089	0.00378
UVRAG	227	239	TSTSNELKKKSEC			12	1454.72	Apo	0	1455.55	0.024461	0	0	5.15512	0.00479
UVRAG	227	239	TSTSNELKKKSEC			12	1454.72	Apo	0.005	1457.05	0.024539	1.5063	0.034648	5.15252	0.01025
UVRAG	227	239	TSTSNELKKKSEC			12	1454.72	Apo	0.05	1457.63	0.050017	2.08514	0.055678	5.15339	0.005894
UVRAG	227	239	TSTSNELKKKSEC			12	1454.72	Apo	0.5	1458.16	0.076504	2.61696	0.080319	5.15048	0.00637
UVRAG	227	239	TSTSNELKKKSEC			12	1454.72	Apo	5	1459.45	0.058523	3.90256	0.063429	5.15824	0.00536
UVRAG	227	239	TSTSNELKKKSEC			12	1454.72	Apo	50	1460.52	0.127932	4.97126	0.130249	5.15224	0.001682
UVRAG	227	239	TSTSNELKKKSEC			12	1454.72	Lipids	0	1455.55	0.024461	0	0	5.15512	0.00479
UVRAG	227	239	TSTSNELKKKSEC			12	1454.72	Lipids	0.005	1457.05	0.052627	1.50443	0.058034	5.15611	0.005707
UVRAG	227	239	TSTSNELKKKSEC			12	1454.72	Lipids	0.05	1457.7	0.105451	2.15803	0.10825	5.16434	0.00492
UVRAG	227	239	TSTSNELKKKSEC			12	1454.72	Lipids	0.5	1458.19	0.1066	2.64028	0.10937	5.16074	0.004739
UVRAG	227	239	TSTSNELKKKSEC			12	1454.72	Lipids	5	1459.54	0.085646	3.9901	0.08907	5.1573	0.00228
UVRAG	227	239	TSTSNELKKKSEC			12	1454.72	Lipids	50	1460.58	0.131567	5.03164	0.133822	5.15088	0.002277
UVRAG	227	241	TSTSNELKKKSECLQ			14	1695.86	Apo	0	1696.78	0.005598	0	0	6.48211	0.00339
UVRAG	227	241	TSTSNELKKKSECLQ			14	1695.86	Apo	0.005	1698.32	0.097031	1.54638	0.097192	6.49296	0.00592
UVRAG	227	241	TSTSNELKKKSECLQ			14	1695.86	Apo	0.05	1698.87	0.154877	2.09255	0.154978	6.49203	0.004426
UVRAG	227	241	TSTSNELKKKSECLQ			14	1695.86	Apo	0.5	1699.42	0.103319	2.64781	0.10347	6.47602	0.004795
UVRAG	227	241	TSTSNELKKKSECLQ			14	1695.86	Apo	5	1700.9	0.123683	4.126	0.12381	6.48739	0.001542
UVRAG	227	241	TSTSNELKKKSECLQ			14	1695.86	Apo	50	1702.78	0.130869	6.00003	0.130989	6.48565	0.00232
UVRAG	227	241	TSTSNELKKKSECLQ			14	1695.86	Lipids	0	1696.78	0.005598	0	0	6.48211	0.00339
UVRAG	227	241	TSTSNELKKKSECLQ			14	1695.86	Lipids	0.005	1698.26	0.097113	1.47994	0.097274	6.49784	0.008955
UVRAG	227	241	TSTSNELKKKSECLQ			14	1695.86	Lipids	0.05	1698.84	0.151901	2.06501	0.152004	6.49438	0.003431
UVRAG	227	241	TSTSNELKKKSECLQ			14	1695.86	Lipids	0.5	1699.56	0.015561	2.78486	0.016537	6.50278	0.000585
UVRAG	227	241	TSTSNELKKKSECLQ			14	1695.86	Lipids	5	1700.96	0.119793	4.18361	0.119924	6.49888	0.005057
UVRAG	227	241	TSTSNELKKKSECLQ			14	1695.86	Lipids	50	1702.7	0.124895	5.92514	0.125021	6.48978	0.001732
UVRAG	228	239	STSNELKKKSEC			11	1353.67	Apo	0	1354.35	0	0	0	5.16186	0
UVRAG	228	239	STSNELKKKSEC			11	1353.67	Apo	0.005	1355.84	0.053828	1.48445	0.053828	5.15317	0.002364
UVRAG	228	239	STSNELKKKSEC			11	1353.67	Apo	0.05	1356.35	0.062735	1.99916	0.062735	5.15564	0.001331
UVRAG	228	239	STSNELKKKSEC			11	1353.67	Apo	0.5	1356.93	0.017733	2.57757	0.017733	5.15214	0.004671
UVRAG	228	239	STSNELKKKSEC			11	1353.67	Apo	5	1358.21	0.011006	3.85454	0.011006	5.15569	0.004967
UVRAG	228	239	STSNELKKKSEC			11	1353.67	Apo	50	1359.16	0.036766	4.80824	0.036766	5.15215	0.000685
UVRAG	228	239	STSNELKKKSEC			11	1353.67	Lipids	0	1354.35	0	0	0	5.16186	0
UVRAG	228	239	STSNELKKKSEC			11	1353.67	Lipids	0.005	1355.86	0.102075	1.50124	0.102075	5.15711	0.001735
UVRAG	228	239	STSNELKKKSEC			11	1353.67	Lipids	0.05	1356.4	0.085412	2.04107	0.085412	5.15948	0.004074
UVRAG	228	239	STSNELKKKSEC			11	1353.67	Lipids	0.5	1356.94	0.005658	2.58597	0.005658	5.16302	0.004732
UVRAG	228	239	STSNELKKKSEC			11	1353.67	Lipids	5	1358.27	0.08372	3.91376	0.08372	5.15708	0.001663
UVRAG	228	239	STSNELKKKSEC			11	1353.67	Lipids	50	1359.31	0.024137	4.95262	0.024137	5.15281	0.002118
UVRAG	237	246	SECLQLKILV			9	1145.66	Apo	0	1145.88	0.012383	0	0	7.11114	0.004128
UVRAG	237	246	SECLQLKILV			9	1145.66	Apo	0.005	1146.6	0.081231	0.721109	0.082169	7.12491	0.019934
UVRAG	237	246	SECLQLKILV			9	1145.66	Apo	0.05	1146.68	0.061101	0.801595	0.062344	7.12186	0.002279
UVRAG	237	246	SECLQLKILV			9	1145.66	Apo	0.5	1146.82	0.037964	0.938271	0.039933	7.12884	0.007156
UVRAG	237	246	SECLQLKILV			9	1145.66	Apo	5	1146.93	0.077129	1.05397	0.078117	7.16106	0.007974
UVRAG	237	246	SECLQLKILV			9	1145.66	Apo	50	1147.09	0.086609	1.20995	0.08749	7.17733	0.009559
UVRAG	237	246	SECLQLKILV			9	1145.66	Lipids	0	1145.88	0.012383	0	0	7.11114	0.004128
UVRAG	237	246	SECLQLKILV			9	1145.66	Lipids	0.005	1146.55	0.06824	0.669943	0.069355	7.14274	0.006229
UVRAG	237	246	SECLQLKILV			9	1145.66	Lipids	0.05	1146.72	0.038058	0.846131	0.040022	7.15128	0.008096
UVRAG	237	246	SECLQLKILV			9	1145.66	Lipids	0.5	1146.85	0.04008	0.973361	0.04195	7.1577	0.00861
UVRAG	237	246	SECLQLKILV			9	1145.66	Lipids	5	1146.97	0.080838	1.09544	0.081781	7.17793	0.008943
UVRAG	237	246	SECLQLKILV			9	1145.66	Lipids	50	1147.05	0.067034	1.17456	0.068168	7.20378	0.006452
UVRAG	245	251	LVLQNEL			6	828.482	Apo	0	828.898	0	0	0	10.5914	0
UVRAG	245	251	LVLQNEL			6	828.482	Apo	0.005	828.959	0.007996	0.061154	0.007996	10.619	0.009118
UVRAG	245	251	LVLQNEL			6	828.482	Apo	0.05	829.002	0.007574	0.103621	0.007574	10.6068	0.002687
UVRAG	245	251	LVLQNEL			6	828.482	Apo	0.5	829.204	0.006	0.306189	0.006	10.6116	0.001204
UVRAG	245	251	LVLQNEL			6	828.482	Apo	5	829.543	0.053245	0.644465	0.053245	10.6313	0.008702
UVRAG	245	251	LVLQNEL			6	828.482	Apo	50	829.897	0.012646	0.998641	0.012646	10.6377	0.001395
UVRAG	245	251	LVLQNEL			6	828.482	Lipids	0	828.898	0	0	0	10.5914	0
UVRAG	245	251	LVLQNEL			6	828.482	Lipids	0.005	828.941	0.0245	0.042452	0.0245	10.6193	0.006191
UVRAG	245	251	LVLQNEL			6	828.482	Lipids	0.05	828.991	0.016636	0.092534	0.016636	10.6223	0.004871
UVRAG	245	251	LVLQNEL			6	828.482	Lipids	0.5	829.236	0.024703	0.337791	0.024703	10.6278	0.003139
UVRAG	245	251	LVLQNEL			6	828.482	Lipids	5	829.593	0.019911	0.695064	0.019911	10.6413	0.003857
UVRAG	245	251	LVLQNEL			6	828.482	Lipids	50	829.94	0.005449	1.04137	0.005449	10.6469	0.004268
UVRAG	252	263	ERQKKALGREVA			11	1384.8	Apo	0	1385.46	0.033582	0	0	4.90697	0.000656
UVRAG	252	263	ERQKKALGREVA			11	1384.8	Apo	0.005	1385.72	0.086372	0.261241	0.092671	4.91129	0.005158
UVRAG	252	263	ERQKKALGREVA			11	1384.8	Apo	0.05	1385.75	0.104887	0.293798	0.110132	4.91588	0.003225
UVRAG	252	263	ERQKKALGREVA			11	1384.8	Apo	0.5	1385.83	0.052638	0.3692	0.062438	4.91628	0.003541
UVRAG	252	263	ERQKKALGREVA			11	1384.8	Apo	5	1386.25	0.054413	0.787955	0.063941	4.9274	0.006409
UVRAG	252	263	ERQKKALGREVA			11	1384.8	Apo	50	1387.57	0.151598	2.10522	0.155273	4.92732	0.003462
UVRAG	252	263	ERQKKALGREVA			11	1384.8	Lipids	0	1385.46	0.033582	0	0	4.90697	0.000656
UVRAG	252	263	ERQKKALGREVA			11	1384.8	Lipids	0.005	1385.71	0.061741	0.246056	0.070283	4.91336	0.003734
UVRAG	252	263	ERQKKALGREVA			11	1384.8	Lipids	0.05	1385.75	0.056241	0.290854	0.065504	4.92541	0.007272
UVRAG	252	263	ERQKKALGREVA			11	1384.8	Lipids	0.5	1385.78	0.129183	0.319353	0.133477	4.92776	0.004178
UVRAG	252	263	ERQKKALGREVA			11	1384.8	Lipids	5	1386.2	0.047724	0.743702	0.058356	4.93441	0.00189
UVRAG	252	263	ERQKKALGREVA			11	1384.8	Lipids	50	1387.59	0.104594	2.13276	0.109852	4.93386	0.002398
UVRAG	252	264	ERQKKALGREVAL			12	1497.89	Apo	0	1498.68	0.008873	0	0	6.45518	0.000776
UVRAG	252	264	ERQKKALGREVAL			12	1497.89	Apo	0.005	1498.91	0.066485	0.231129	0.067075	6.48743	0.009523
UVRAG	252	264	ERQKKALGREVAL			12	1497.89	Apo	0.05	1498.93	0.019287	0.253934	0.02123	6.49277	0.006409
UVRAG	252	264	ERQKKALGREVAL			12	1497.89	Apo	0.5	1498.96	0.017886	0.279279	0.019966	6.48928	0.0068
UVRAG	252	264	ERQKKALGREVAL			12	1497.89	Apo	5	1499.49	0.049718	0.811438	0.050504	6.51694	0.010296
UVRAG	252	264	ERQKKALGREVAL			12	1497.89	Apo	50	1500.9	0.016082	2.22277	0.018368	6.52645	0.006289
UVRAG	252	264	ERQKKALGREVAL			12	1497.89	Lipids	0	1498.68	0.008873	0	0	6.45518	0.000776
UVRAG	252	264	ERQKKALGREVAL			12	1497.89	Lipids	0.005	1498.99	0.071607	0.314695	0.072155	6.49573	0.014766
UVRAG	252	264	ERQKKALGREVAL			12	1497.89	Lipids	0.05	1498.94	0.062994	0.257159	0.063616	6.50412	0.006728
UVRAG	252	264	ERQKKALGREVAL			12	1497.89	Lipids	0.5	1499.01	0.0416	0.332856	0.042535	6.51453	0.00677
UVRAG	252	264	ERQKKALGREVAL			12	1497.89	Lipids	5	1499.53	0.049602	0.854026	0.05039	6.53061	0.006541
UVRAG	252	264	ERQKKALGREVAL			12	1497.89	Lipids	50	1500.95	0.046441	2.26604	0.047281	6.54224	0.006064
UVRAG	262	271	VALLHKQQIA			9	1120.68	Apo	0	1121.26	0	0	0	7.10204	0
UVRAG	262	271	VALLHKQQIA			9	1120.68	Apo	0.005	1121.4	0.088226	0.141707	0.088226	7.12957	0.014285
UVRAG	262	271	VALLHKQQIA			9	1120.68	Apo	0.05	1121.43	0.020214	0.177978	0.020214	7.12928	0.005092
UVRAG	262	271	VALLHKQQIA			9	1120.68	Apo	0.5	1121.46	0.064517	0.20648	0.064517	7.13274	0.006212
UVRAG	262	271	VALLHKQQIA			9	1120.68	Apo	5	1121.9	0.126061	0.646239	0.126061	7.15428	0.004073
UVRAG	262	271	VALLHKQQIA			9	1120.68	Apo	50	1123.62	0.207063	2.36517	0.207063	7.16129	0.00708
UVRAG	262	271	VALLHKQQIA			9	1120.68	Lipids	0	1121.26	0	0	0	7.10204	0
UVRAG	262	271	VALLHKQQIA			9	1120.68	Lipids	0.005	1121.47	0.014575	0.217413	0.014575	7.13699	0.00555
UVRAG	262	271	VALLHKQQIA			9	1120.68	Lipids	0.05	1121.49	0.039409	0.23316	0.039409	7.14189	0.007652
UVRAG	262	271	VALLHKQQIA			9	1120.68	Lipids	0.5	1121.55	0.014911	0.292336	0.014911	7.14698	0.00925
UVRAG	262	271	VALLHKQQIA			9	1120.68	Lipids	5	1121.88	0.017649	0.620232	0.017649	7.16639	0.00409
UVRAG	262	271	VALLHKQQIA			9	1120.68	Lipids	50	1123.6	0.070288	2.33998	0.070288	7.1706	0.0034
UVRAG	262	279	VALLHKQQIALQDKGSAF			17	1967.11	Apo	0	1968.13	0.083504	0	0	8.65737	0.002554
UVRAG	262	279	VALLHKQQIALQDKGSAF			17	1967.11	Apo	0.005	1968.82	0.047864	0.686971	0.096249	8.65679	0.014516
UVRAG	262	279	VALLHKQQIALQDKGSAF			17	1967.11	Apo	0.05	1969.53	0.09542	1.40339	0.126799	8.69028	0.002436
UVRAG	262	279	VALLHKQQIALQDKGSAF			17	1967.11	Apo	0.5	1970.39	0.202669	2.25548	0.219197	8.64671	0.058126
UVRAG	262	279	VALLHKQQIALQDKGSAF			17	1967.11	Apo	5	1971.83	0.128902	3.69769	0.153586	8.71009	0.03711
UVRAG	262	279	VALLHKQQIALQDKGSAF			17	1967.11	Apo	50	1973.89	0.238187	5.76225	0.2524	8.7259	0.005646
UVRAG	262	279	VALLHKQQIALQDKGSAF			17	1967.11	Lipids	0	1968.13	0.083504	0	0	8.65737	0.002554
UVRAG	262	279	VALLHKQQIALQDKGSAF			17	1967.11	Lipids	0.005	1968.97	0.167156	0.841799	0.186853	8.69353	0.025131
UVRAG	262	279	VALLHKQQIALQDKGSAF			17	1967.11	Lipids	0.05	1969.55	0.031698	1.41483	0.089318	8.67154	0.050241
UVRAG	262	279	VALLHKQQIALQDKGSAF			17	1967.11	Lipids	0.5	1970.55	0.128037	2.41955	0.152861	8.68918	0.029142
UVRAG	262	279	VALLHKQQIALQDKGSAF			17	1967.11	Lipids	5	1971.93	0	3.80049	0.083504	8.6745	0
UVRAG	262	279	VALLHKQQIALQDKGSAF			17	1967.11	Lipids	50	1974.06	0.244209	5.92758	0.258091	8.74764	0.007213
UVRAG	264	271	LLHKQQIA			7	950.578	Apo	0	950.794	0	0	0	7.00784	0
UVRAG	264	271	LLHKQQIA			7	950.578	Apo	0.005	951.499	0.242239	0.705072	0.242239	7.02912	0.012387
UVRAG	264	271	LLHKQQIA			7	950.578	Apo	0.05	951.644	0.063737	0.849518	0.063737	7.02941	0.008144
UVRAG	264	271	LLHKQQIA			7	950.578	Apo	0.5	951.622	0.065151	0.828203	0.065151	7.03538	0.003464
UVRAG	264	271	LLHKQQIA			7	950.578	Apo	5	951.667	0.08933	0.87275	0.08933	7.05783	0.009599
UVRAG	264	271	LLHKQQIA			7	950.578	Apo	50	951.65	0.10798	0.855509	0.10798	7.07184	0.003617
UVRAG	264	271	LLHKQQIA			7	950.578	Lipids	0	950.794	0	0	0	7.00784	0
UVRAG	264	271	LLHKQQIA			7	950.578	Lipids	0.005	951.63	0.095771	0.835887	0.095771	7.04187	0.012438
UVRAG	264	271	LLHKQQIA			7	950.578	Lipids	0.05	951.666	0.06049	0.872035	0.06049	7.04839	0.006945
UVRAG	264	271	LLHKQQIA			7	950.578	Lipids	0.5	951.651	0.090973	0.857262	0.090973	7.05696	0.00821
UVRAG	264	271	LLHKQQIA			7	950.578	Lipids	5	951.653	0.072278	0.858966	0.072278	7.07453	0.003569
UVRAG	264	271	LLHKQQIA			7	950.578	Lipids	50	951.666	0.05496	0.871681	0.05496	7.08205	0.00219
UVRAG	265	272	LHKQQIAL			7	950.578	Apo	0	950.858	0.057815	0	0	7.51853	0.001451
UVRAG	265	272	LHKQQIAL			7	950.578	Apo	0.005	951.016	0.059396	0.158186	0.082888	7.54939	0.018785
UVRAG	265	272	LHKQQIAL			7	950.578	Apo	0.05	950.95	0.069147	0.092063	0.090133	7.54752	0.007987
UVRAG	265	272	LHKQQIAL			7	950.578	Apo	0.5	951.072	0.097502	0.214296	0.113355	7.55337	0.007114
UVRAG	265	272	LHKQQIAL			7	950.578	Apo	5	951.362	0.073913	0.503615	0.093839	7.57833	0.011547
UVRAG	265	272	LHKQQIAL			7	950.578	Apo	50	952.758	0.212253	1.9004	0.219986	7.58956	0.00303
UVRAG	265	272	LHKQQIAL			7	950.578	Lipids	0	950.858	0.057815	0	0	7.51853	0.001451
UVRAG	265	272	LHKQQIAL			7	950.578	Lipids	0.005	951.082	0.02914	0.223754	0.064744	7.56276	0.009503
UVRAG	265	272	LHKQQIAL			7	950.578	Lipids	0.05	951.056	0.094276	0.198127	0.110592	7.56747	0.006896
UVRAG	265	272	LHKQQIAL			7	950.578	Lipids	0.5	951.118	0.026318	0.259576	0.063524	7.57895	0.008915
UVRAG	265	272	LHKQQIAL			7	950.578	Lipids	5	951.444	0.078383	0.586118	0.097399	7.59404	0.006305
UVRAG	265	272	LHKQQIAL			7	950.578	Lipids	50	952.858	0.132637	2.00013	0.14469	7.60174	0.003438
UVRAG	265	279	LHKQQIALQDKGSAF			14	1683.92	Apo	0	1684.67	0.012937	0	0	7.65437	0.002852
UVRAG	265	279	LHKQQIALQDKGSAF			14	1683.92	Apo	0.005	1685.49	0.040704	0.821697	0.04271	7.68833	0.016992
UVRAG	265	279	LHKQQIALQDKGSAF			14	1683.92	Apo	0.05	1686.15	0.091583	1.4809	0.092493	7.69474	0.001972
UVRAG	265	279	LHKQQIALQDKGSAF			14	1683.92	Apo	0.5	1686.94	0.072551	2.26776	0.073695	7.69683	0.00716
UVRAG	265	279	LHKQQIALQDKGSAF			14	1683.92	Apo	5	1688.17	0.066624	3.50576	0.067868	7.7205	0.009318
UVRAG	265	279	LHKQQIALQDKGSAF			14	1683.92	Apo	50	1689.75	0.084281	5.07862	0.085268	7.73009	0.006358
UVRAG	265	279	LHKQQIALQDKGSAF			14	1683.92	Lipids	0	1684.67	0.012937	0	0	7.65437	0.002852
UVRAG	265	279	LHKQQIALQDKGSAF			14	1683.92	Lipids	0.005	1685.5	0.051318	0.828817	0.052924	7.71051	0.004418
UVRAG	265	279	LHKQQIALQDKGSAF			14	1683.92	Lipids	0.05	1686.17	0.040726	1.50476	0.042731	7.7079	0.004951
UVRAG	265	279	LHKQQIALQDKGSAF			14	1683.92	Lipids	0.5	1687.07	0.019315	2.40467	0.023247	7.71738	8.30541e-05
UVRAG	265	279	LHKQQIALQDKGSAF			14	1683.92	Lipids	5	1688.23	0.036043	3.55854	0.038294	7.72813	0.002642
UVRAG	265	279	LHKQQIALQDKGSAF			14	1683.92	Lipids	50	1689.91	0.043604	5.2386	0.045483	7.73431	0.004564
UVRAG	266	278	HKQQIALQDKGSA			12	1423.77	Apo	0	1424.37	0.005955	0	0	5.49114	0.000135
UVRAG	266	278	HKQQIALQDKGSA			12	1423.77	Apo	0.005	1425.05	0.036538	0.680574	0.03702	5.49501	0.006275
UVRAG	266	278	HKQQIALQDKGSA			12	1423.77	Apo	0.05	1425.72	0.056462	1.34454	0.056776	5.49813	0.003282
UVRAG	266	278	HKQQIALQDKGSA			12	1423.77	Apo	0.5	1426.37	0.100048	1.99883	0.100225	5.49799	0.007229
UVRAG	266	278	HKQQIALQDKGSA			12	1423.77	Apo	5	1427.27	0.151627	2.8954	0.151744	5.50947	0.00585
UVRAG	266	278	HKQQIALQDKGSA			12	1423.77	Apo	50	1428.86	0.185675	4.49256	0.18577	5.50819	0.003752
UVRAG	266	278	HKQQIALQDKGSA			12	1423.77	Lipids	0	1424.37	0.005955	0	0	5.49114	0.000135
UVRAG	266	278	HKQQIALQDKGSA			12	1423.77	Lipids	0.005	1425.11	0.091618	0.739036	0.091811	5.50075	0.008012
UVRAG	266	278	HKQQIALQDKGSA			12	1423.77	Lipids	0.05	1425.68	0.091604	1.30734	0.091798	5.50421	0.004608
UVRAG	266	278	HKQQIALQDKGSA			12	1423.77	Lipids	0.5	1426.42	0.119008	2.04501	0.119157	5.50869	0.005199
UVRAG	266	278	HKQQIALQDKGSA			12	1423.77	Lipids	5	1427.3	0.172852	2.93383	0.172954	5.51275	0.003623
UVRAG	266	278	HKQQIALQDKGSA			12	1423.77	Lipids	50	1428.95	0.122599	4.57688	0.122744	5.51391	0.00407
UVRAG	266	279	HKQQIALQDKGSAF			13	1570.83	Apo	0	1571.56	0.054066	0	0	7.46226	0.006117
UVRAG	266	279	HKQQIALQDKGSAF			13	1570.83	Apo	0.005	1572.24	0.119878	0.677533	0.131506	7.47224	0.018442
UVRAG	266	279	HKQQIALQDKGSAF			13	1570.83	Apo	0.05	1573	0.055114	1.43761	0.077206	7.48564	0.004315
UVRAG	266	279	HKQQIALQDKGSAF			13	1570.83	Apo	0.5	1573.84	0.049938	2.27795	0.0736	7.49099	0.004398
UVRAG	266	279	HKQQIALQDKGSAF			13	1570.83	Apo	5	1574.99	0.114852	3.42917	0.126941	7.51824	0.010296
UVRAG	266	279	HKQQIALQDKGSAF			13	1570.83	Apo	50	1576.51	0.127517	4.94647	0.138505	7.51645	0.005226
UVRAG	266	279	HKQQIALQDKGSAF			13	1570.83	Lipids	0	1571.56	0.054066	0	0	7.46226	0.006117
UVRAG	266	279	HKQQIALQDKGSAF			13	1570.83	Lipids	0.005	1572.31	0.072077	0.750735	0.090102	7.50122	0.008591
UVRAG	266	279	HKQQIALQDKGSAF			13	1570.83	Lipids	0.05	1573.03	0.079625	1.46867	0.096246	7.50778	0.004237
UVRAG	266	279	HKQQIALQDKGSAF			13	1570.83	Lipids	0.5	1573.84	0.021773	2.27302	0.058286	7.5233	0.0014
UVRAG	266	279	HKQQIALQDKGSAF			13	1570.83	Lipids	5	1575.06	0.040405	3.49516	0.067496	7.52242	0.005371
UVRAG	266	279	HKQQIALQDKGSAF			13	1570.83	Lipids	50	1576.53	0.068976	4.96725	0.087641	7.53073	0.00878
UVRAG	273	279	QDKGSAF			6	752.357	Apo	0	752.703	0	0	0	6.82606	0
UVRAG	273	279	QDKGSAF			6	752.357	Apo	0.005	753.181	0.028065	0.477695	0.028065	6.85143	0.011647
UVRAG	273	279	QDKGSAF			6	752.357	Apo	0.05	753.742	0.021178	1.03913	0.021178	6.85979	0.005086
UVRAG	273	279	QDKGSAF			6	752.357	Apo	0.5	754.345	0.023738	1.64234	0.023738	6.8494	0.012024
UVRAG	273	279	QDKGSAF			6	752.357	Apo	5	754.784	0.003451	2.08059	0.003451	6.87979	0.008905
UVRAG	273	279	QDKGSAF			6	752.357	Apo	50	754.744	0.04466	2.04108	0.04466	6.88891	0.004411
UVRAG	273	279	QDKGSAF			6	752.357	Lipids	0	752.703	0	0	0	6.82606	0
UVRAG	273	279	QDKGSAF			6	752.357	Lipids	0.005	753.168	0.015694	0.464853	0.015694	6.837	0.05002
UVRAG	273	279	QDKGSAF			6	752.357	Lipids	0.05	753.725	0.020012	1.02166	0.020012	6.86614	0.001018
UVRAG	273	279	QDKGSAF			6	752.357	Lipids	0.5	754.346	0.028347	1.64303	0.028347	6.87779	0.005697
UVRAG	273	279	QDKGSAF			6	752.357	Lipids	5	754.769	0.049731	2.06653	0.049731	6.89243	0.002282
UVRAG	273	279	QDKGSAF			6	752.357	Lipids	50	754.789	0.029441	2.08621	0.029441	6.89924	0.001781
UVRAG	276	283	GSAFSAEH			7	805.347	Apo	0	805.833	0.038754	0	0	4.90848	0.002237
UVRAG	276	283	GSAFSAEH			7	805.347	Apo	0.005	805.872	0.034489	0.038218	0.051878	4.91153	0.004449
UVRAG	276	283	GSAFSAEH			7	805.347	Apo	0.05	806.026	0.035442	0.192447	0.052517	4.91793	0.001648
UVRAG	276	283	GSAFSAEH			7	805.347	Apo	0.5	806.126	0.03169	0.293066	0.050061	4.91859	0.005465
UVRAG	276	283	GSAFSAEH			7	805.347	Apo	5	806.147	0.018803	0.313966	0.043074	4.93363	0.008626
UVRAG	276	283	GSAFSAEH			7	805.347	Apo	50	806.576	0.0548	0.743026	0.067118	4.93806	0.003025
UVRAG	276	283	GSAFSAEH			7	805.347	Lipids	0	805.833	0.038754	0	0	4.90848	0.002237
UVRAG	276	283	GSAFSAEH			7	805.347	Lipids	0.005	805.912	0.057442	0.078117	0.069292	4.91603	0.004251
UVRAG	276	283	GSAFSAEH			7	805.347	Lipids	0.05	806.102	0.053743	0.268787	0.066259	4.92593	0.00886
UVRAG	276	283	GSAFSAEH			7	805.347	Lipids	0.5	806.119	0.063079	0.285361	0.074033	4.93153	0.006533
UVRAG	276	283	GSAFSAEH			7	805.347	Lipids	5	806.234	0.074747	0.400567	0.084196	4.94233	0.003578
UVRAG	276	283	GSAFSAEH			7	805.347	Lipids	50	806.578	0.040948	0.744761	0.056379	4.94166	0.00266
UVRAG	282	288	EHLKLQL			6	880.525	Apo	0	880.945	0	0	0	9.24413	0
UVRAG	282	288	EHLKLQL			6	880.525	Apo	0.005	881.153	0.017801	0.20793	0.017801	9.27447	0.016774
UVRAG	282	288	EHLKLQL			6	880.525	Apo	0.05	881.729	0.026306	0.784182	0.026306	9.28013	0.002147
UVRAG	282	288	EHLKLQL			6	880.525	Apo	0.5	882.558	0.029462	1.61319	0.029462	9.28721	0.003339
UVRAG	282	288	EHLKLQL			6	880.525	Apo	5	883.283	0.022513	2.33719	0.022513	9.31321	0.009474
UVRAG	282	288	EHLKLQL			6	880.525	Apo	50	883.287	0.142794	2.34206	0.142794	9.3254	0.003821
UVRAG	282	288	EHLKLQL			6	880.525	Lipids	0	880.945	0	0	0	9.24413	0
UVRAG	282	288	EHLKLQL			6	880.525	Lipids	0.005	881.196	0.014692	0.250788	0.014692	9.29278	0.016239
UVRAG	282	288	EHLKLQL			6	880.525	Lipids	0.05	881.655	0.123994	0.709262	0.123994	9.3041	0.005931
UVRAG	282	288	EHLKLQL			6	880.525	Lipids	0.5	882.592	0.052504	1.64676	0.052504	9.31292	0.005858
UVRAG	282	288	EHLKLQL			6	880.525	Lipids	5	883.352	0.02739	2.40669	0.02739	9.33232	0.004669
UVRAG	282	288	EHLKLQL			6	880.525	Lipids	50	883.182	0.271034	2.23636	0.271034	9.34693	0.002907
UVRAG	282	294	EHLKLQLQKESLN			12	1579.88	Apo	0	1580.47	0.093869	0	0	7.7326	0.002752
UVRAG	282	294	EHLKLQLQKESLN			12	1579.88	Apo	0.005	1581.32	0.071459	0.845522	0.117974	7.75748	0.016234
UVRAG	282	294	EHLKLQLQKESLN			12	1579.88	Apo	0.05	1582.66	0.027351	2.18566	0.097772	7.75297	0.002826
UVRAG	282	294	EHLKLQLQKESLN			12	1579.88	Apo	0.5	1584.41	0.04529	3.93324	0.104223	7.75669	0.001683
UVRAG	282	294	EHLKLQLQKESLN			12	1579.88	Apo	5	1586.17	0.060146	5.69986	0.111485	7.77798	0.011266
UVRAG	282	294	EHLKLQLQKESLN			12	1579.88	Apo	50	1586.36	0.052061	5.8881	0.107339	7.78596	0.003669
UVRAG	282	294	EHLKLQLQKESLN			12	1579.88	Lipids	0	1580.47	0.093869	0	0	7.7326	0.002752
UVRAG	282	294	EHLKLQLQKESLN			12	1579.88	Lipids	0.005	1581.34	0.076783	0.866431	0.121272	7.7645	0.003693
UVRAG	282	294	EHLKLQLQKESLN			12	1579.88	Lipids	0.05	1582.61	0.098456	2.14241	0.136033	7.76879	0.005057
UVRAG	282	294	EHLKLQLQKESLN			12	1579.88	Lipids	0.5	1584.48	0.069671	4.00552	0.116899	7.77532	0.004578
UVRAG	282	294	EHLKLQLQKESLN			12	1579.88	Lipids	5	1586.16	0.024149	5.68339	0.096925	7.7853	0.005269
UVRAG	282	294	EHLKLQLQKESLN			12	1579.88	Lipids	50	1586.42	0.022597	5.95263	0.09655	7.79848	0.004724
UVRAG	289	308	QKESLNELRKECTAKRELFL			19	2435.31	Apo	0	2436.7	0	0	0	6.06691	0
UVRAG	289	308	QKESLNELRKECTAKRELFL			19	2435.31	Apo	0.005	2437.95	0.144694	1.24914	0.144694	6.10522	0.01223
UVRAG	289	308	QKESLNELRKECTAKRELFL			19	2435.31	Apo	0.05	2438.51	0.029779	1.8019	0.029779	6.11233	0.002186
UVRAG	289	308	QKESLNELRKECTAKRELFL			19	2435.31	Apo	0.5	2438.97	0.081612	2.26	0.081612	6.13055	0.01141
UVRAG	289	308	QKESLNELRKECTAKRELFL			19	2435.31	Apo	5	2439.19	0.095449	2.48673	0.095449	6.1666	0.012972
UVRAG	289	308	QKESLNELRKECTAKRELFL			19	2435.31	Apo	50	2439.28	0.07778	2.577	0.07778	6.20143	0.014593
UVRAG	289	308	QKESLNELRKECTAKRELFL			19	2435.31	Lipids	0	2436.7	0	0	0	6.06691	0
UVRAG	289	308	QKESLNELRKECTAKRELFL			19	2435.31	Lipids	0.005	2437.98	0.216982	1.27774	0.216982	6.1235	0.009437
UVRAG	289	308	QKESLNELRKECTAKRELFL			19	2435.31	Lipids	0.05	2438.53	0.130575	1.82754	0.130575	6.1444	0.021855
UVRAG	289	308	QKESLNELRKECTAKRELFL			19	2435.31	Lipids	0.5	2438.84	0.08704	2.1309	0.08704	6.16838	0.030078
UVRAG	289	308	QKESLNELRKECTAKRELFL			19	2435.31	Lipids	5	2439.13	0.060649	2.42186	0.060649	6.20705	0.014917
UVRAG	289	308	QKESLNELRKECTAKRELFL			19	2435.31	Lipids	50	2439.27	0.197314	2.56045	0.197314	6.29087	0.018548
UVRAG	302	308	AKRELFL			6	876.53	Apo	0	877.01	0.017555	0	0	9.58725	0.002405
UVRAG	302	308	AKRELFL			6	876.53	Apo	0.005	876.927	0.124336	-0.082452	0.125569	9.6497	0.020958
UVRAG	302	308	AKRELFL			6	876.53	Apo	0.05	876.997	0.068788	-0.012499	0.070992	9.6491	0.005215
UVRAG	302	308	AKRELFL			6	876.53	Apo	0.5	876.925	0.07197	-0.084705	0.07408	9.66086	0.005969
UVRAG	302	308	AKRELFL			6	876.53	Apo	5	877.224	0.122983	0.214534	0.12423	9.69848	0.010945
UVRAG	302	308	AKRELFL			6	876.53	Apo	50	878.314	0.085734	1.30398	0.087512	9.71892	0.007757
UVRAG	302	308	AKRELFL			6	876.53	Lipids	0	877.01	0.017555	0	0	9.58725	0.002405
UVRAG	302	308	AKRELFL			6	876.53	Lipids	0.005	876.959	0.078142	-0.050936	0.08009	9.66157	0.017298
UVRAG	302	308	AKRELFL			6	876.53	Lipids	0.05	877.053	0.080314	0.04285	0.08221	9.67309	0.014566
UVRAG	302	308	AKRELFL			6	876.53	Lipids	0.5	877.089	0.060723	0.078896	0.06321	9.68969	0.007605
UVRAG	302	308	AKRELFL			6	876.53	Lipids	5	877.297	0.053158	0.287173	0.055981	9.7208	0.006593
UVRAG	302	308	AKRELFL			6	876.53	Lipids	50	878.421	0.072073	1.41075	0.07418	9.73964	0.007277
UVRAG	308	314	LKTNAQL			6	787.467	Apo	0	787.773	0.022354	0	0	6.86938	0.001193
UVRAG	308	314	LKTNAQL			6	787.467	Apo	0.005	787.874	0.039709	0.101508	0.045569	6.89353	0.009823
UVRAG	308	314	LKTNAQL			6	787.467	Apo	0.05	787.903	0.035768	0.130803	0.042179	6.90101	0.002628
UVRAG	308	314	LKTNAQL			6	787.467	Apo	0.5	788.027	0.049441	0.253949	0.05426	6.90195	0.003538
UVRAG	308	314	LKTNAQL			6	787.467	Apo	5	788.724	0.123319	0.951701	0.125329	6.91869	0.0086
UVRAG	308	314	LKTNAQL			6	787.467	Apo	50	789.953	0.044043	2.18003	0.049392	6.92663	0.001347
UVRAG	308	314	LKTNAQL			6	787.467	Lipids	0	787.773	0.022354	0	0	6.86938	0.001193
UVRAG	308	314	LKTNAQL			6	787.467	Lipids	0.005	787.907	0.049184	0.134017	0.054026	6.90868	0.006196
UVRAG	308	314	LKTNAQL			6	787.467	Lipids	0.05	787.902	0.02925	0.129768	0.036814	6.91126	0.015104
UVRAG	308	314	LKTNAQL			6	787.467	Lipids	0.5	788.029	0.075377	0.255911	0.078622	6.92175	0.014847
UVRAG	308	314	LKTNAQL			6	787.467	Lipids	5	788.779	0.087405	1.0061	0.090218	6.9303	0.004013
UVRAG	308	314	LKTNAQL			6	787.467	Lipids	50	789.983	0.033185	2.21013	0.040012	6.93138	0.006685
UVRAG	326	333	SYIYPIDL			6	983.508	Apo	0	983.932	0	0	0	12.896	0
UVRAG	326	333	SYIYPIDL			6	983.508	Apo	0.005	984.199	0.036596	0.266667	0.036596	12.9128	0.010554
UVRAG	326	333	SYIYPIDL			6	983.508	Apo	0.05	984.398	0.038226	0.466009	0.038226	12.9018	0.003331
UVRAG	326	333	SYIYPIDL			6	983.508	Apo	0.5	984.941	0.007333	1.00902	0.007333	12.9007	0.003237
UVRAG	326	333	SYIYPIDL			6	983.508	Apo	5	985.327	0.013529	1.3949	0.013529	12.9257	0.016406
UVRAG	326	333	SYIYPIDL			6	983.508	Apo	50	985.354	0.012661	1.42145	0.012661	12.9329	0.001065
UVRAG	326	333	SYIYPIDL			6	983.508	Lipids	0	983.932	0	0	0	12.896	0
UVRAG	326	333	SYIYPIDL			6	983.508	Lipids	0.005	984.232	0.008912	0.299797	0.008912	12.9167	0.010175
UVRAG	326	333	SYIYPIDL			6	983.508	Lipids	0.05	984.444	0.003122	0.511768	0.003122	12.9134	0.006979
UVRAG	326	333	SYIYPIDL			6	983.508	Lipids	0.5	984.942	0.019761	1.00982	0.019761	12.9242	0.026137
UVRAG	326	333	SYIYPIDL			6	983.508	Lipids	5	985.367	0.008157	1.43528	0.008157	12.9333	0.004725
UVRAG	326	333	SYIYPIDL			6	983.508	Lipids	50	985.364	0.018362	1.4324	0.018362	12.9318	0.001337
UVRAG	327	333	YIYPIDL			5	896.476	Apo	0	896.976	0.072922	0	0	12.9533	0.000694
UVRAG	327	333	YIYPIDL			5	896.476	Apo	0.005	897.074	0.017049	0.097382	0.074888	12.9626	0.012558
UVRAG	327	333	YIYPIDL			5	896.476	Apo	0.05	897.287	0.028236	0.310786	0.078198	12.9571	0.002165
UVRAG	327	333	YIYPIDL			5	896.476	Apo	0.5	897.805	0.029956	0.829105	0.078835	12.9534	0.005636
UVRAG	327	333	YIYPIDL			5	896.476	Apo	5	898.205	0.059476	1.22892	0.094101	12.9769	0.013425
UVRAG	327	333	YIYPIDL			5	896.476	Apo	50	898.203	0.043389	1.22649	0.084854	12.9806	0.00666
UVRAG	327	333	YIYPIDL			5	896.476	Lipids	0	896.976	0.072922	0	0	12.9533	0.000694
UVRAG	327	333	YIYPIDL			5	896.476	Lipids	0.005	897.096	0.019381	0.119853	0.075453	12.9658	0.010883
UVRAG	327	333	YIYPIDL			5	896.476	Lipids	0.05	897.289	0.02379	0.312434	0.076704	12.9677	0.00933
UVRAG	327	333	YIYPIDL			5	896.476	Lipids	0.5	897.803	0.03616	0.826789	0.081395	12.974	0.025028
UVRAG	327	333	YIYPIDL			5	896.476	Lipids	5	898.205	0.047632	1.22868	0.0871	12.9845	0.005482
UVRAG	327	333	YIYPIDL			5	896.476	Lipids	50	898.217	0.039259	1.2404	0.082818	12.9823	0.004575
UVRAG	330	337	PIDLNEHK			6	965.505	Apo	0	966.013	0.024589	0	0	13.304	0.00014
UVRAG	330	337	PIDLNEHK			6	965.505	Apo	0.005	966.048	0.051685	0.034805	0.057236	13.303	0.004627
UVRAG	330	337	PIDLNEHK			6	965.505	Apo	0.05	966.21	0.062075	0.196969	0.066768	13.3034	0.00175
UVRAG	330	337	PIDLNEHK			6	965.505	Apo	0.5	966.543	0.062361	0.529603	0.067034	13.298	0.005277
UVRAG	330	337	PIDLNEHK			6	965.505	Apo	5	966.818	0.074368	0.805319	0.078327	13.3071	0.015228
UVRAG	330	337	PIDLNEHK			6	965.505	Apo	50	966.95	0.082434	0.93651	0.086023	13.313	0.005431
UVRAG	330	337	PIDLNEHK			6	965.505	Lipids	0	966.013	0.024589	0	0	13.304	0.00014
UVRAG	330	337	PIDLNEHK			6	965.505	Lipids	0.005	966.11	0.067586	0.096706	0.07192	13.3022	0.002982
UVRAG	330	337	PIDLNEHK			6	965.505	Lipids	0.05	966.209	0.039719	0.195594	0.046714	13.3078	0.009126
UVRAG	330	337	PIDLNEHK			6	965.505	Lipids	0.5	966.588	0.04212	0.575217	0.048772	13.3148	0.024225
UVRAG	330	337	PIDLNEHK			6	965.505	Lipids	5	966.914	0.229576	0.901362	0.230889	13.316	0.004153
UVRAG	330	337	PIDLNEHK			6	965.505	Lipids	50	967.068	0.092261	1.05523	0.095482	13.3147	0.011141
UVRAG	339	348	YFVCGVKLPN			8	1139.59	Apo	0	1140.17	0	0	0	12.345	0
UVRAG	339	348	YFVCGVKLPN			8	1139.59	Apo	0.005	1141.99	0.037963	1.82351	0.037963	12.3577	0.00927
UVRAG	339	348	YFVCGVKLPN			8	1139.59	Apo	0.05	1142.54	0.04616	2.37733	0.04616	12.3526	0.004502
UVRAG	339	348	YFVCGVKLPN			8	1139.59	Apo	0.5	1142.77	0.044322	2.60376	0.044322	12.3534	0.007691
UVRAG	339	348	YFVCGVKLPN			8	1139.59	Apo	5	1143.33	0.025899	3.16376	0.025899	12.375	0.015736
UVRAG	339	348	YFVCGVKLPN			8	1139.59	Apo	50	1143.83	0.070872	3.65994	0.070872	12.3873	0.002607
UVRAG	339	348	YFVCGVKLPN			8	1139.59	Lipids	0	1140.17	0	0	0	12.345	0
UVRAG	339	348	YFVCGVKLPN			8	1139.59	Lipids	0.005	1141.87	0.016538	1.69937	0.016538	12.3629	0.010679
UVRAG	339	348	YFVCGVKLPN			8	1139.59	Lipids	0.05	1142.61	0.053707	2.44758	0.053707	12.3632	0.012653
UVRAG	339	348	YFVCGVKLPN			8	1139.59	Lipids	0.5	1142.79	0.071929	2.62748	0.071929	12.3721	0.015378
UVRAG	339	348	YFVCGVKLPN			8	1139.59	Lipids	5	1143.33	0.057344	3.16134	0.057344	12.3811	0.002655
UVRAG	339	348	YFVCGVKLPN			8	1139.59	Lipids	50	1143.75	0.034262	3.58794	0.034262	12.393	0.001693
UVRAG	344	351	VKLPNSED			6	901.462	Apo	0	901.842	0.038753	0	0	6.64077	0.002042
UVRAG	344	351	VKLPNSED			6	901.462	Apo	0.005	902.515	0.054151	0.672681	0.06659	6.65897	0.004551
UVRAG	344	351	VKLPNSED			6	901.462	Apo	0.05	903.612	0.036656	1.76999	0.053343	6.65877	0.005283
UVRAG	344	351	VKLPNSED			6	901.462	Apo	0.5	903.66	0.069818	1.81753	0.079852	6.66139	0.004083
UVRAG	344	351	VKLPNSED			6	901.462	Apo	5	903.809	0.044539	1.96727	0.059038	6.67677	0.006989
UVRAG	344	351	VKLPNSED			6	901.462	Apo	50	903.863	0.032097	2.02073	0.050319	6.68096	0.002287
UVRAG	344	351	VKLPNSED			6	901.462	Lipids	0	901.842	0.038753	0	0	6.64077	0.002042
UVRAG	344	351	VKLPNSED			6	901.462	Lipids	0.005	902.488	0.033037	0.646269	0.050924	6.66739	0.006917
UVRAG	344	351	VKLPNSED			6	901.462	Lipids	0.05	903.644	0.01916	1.80158	0.043231	6.66914	0.002648
UVRAG	344	351	VKLPNSED			6	901.462	Lipids	0.5	903.738	0.007388	1.89622	0.039451	6.67333	0.007922
UVRAG	344	351	VKLPNSED			6	901.462	Lipids	5	903.807	0.047692	1.96519	0.061452	6.68497	0.003195
UVRAG	344	351	VKLPNSED			6	901.462	Lipids	50	903.855	0.031773	2.01251	0.050113	6.68825	0.001391
UVRAG	345	351	KLPNSED			5	802.394	Apo	0	802.755	0	0	0	6.64894	0
UVRAG	345	351	KLPNSED			5	802.394	Apo	0.005	803.289	0.041759	0.534431	0.041759	6.66424	0.00653
UVRAG	345	351	KLPNSED			5	802.394	Apo	0.05	804.054	0.044717	1.29952	0.044717	6.66976	0.005125
UVRAG	345	351	KLPNSED			5	802.394	Apo	0.5	804.218	0.005171	1.46313	0.005171	6.65917	0.002016
UVRAG	345	351	KLPNSED			5	802.394	Apo	5	804.355	0.068944	1.60051	0.068944	6.68233	0.007049
UVRAG	345	351	KLPNSED			5	802.394	Apo	50	804.362	0.041239	1.60667	0.041239	6.68802	0.000532
UVRAG	345	351	KLPNSED			5	802.394	Lipids	0	802.755	0	0	0	6.64894	0
UVRAG	345	351	KLPNSED			5	802.394	Lipids	0.005	803.287	0.03731	0.531971	0.03731	6.67412	0.010999
UVRAG	345	351	KLPNSED			5	802.394	Lipids	0.05	804.17	0.078715	1.41477	0.078715	6.67578	0.002454
UVRAG	345	351	KLPNSED			5	802.394	Lipids	0.5	804.275	0.04482	1.52052	0.04482	6.68147	0.004636
UVRAG	345	351	KLPNSED			5	802.394	Lipids	5	804.415	0.018425	1.65999	0.018425	6.68999	0.002136
UVRAG	345	351	KLPNSED			5	802.394	Lipids	50	804.454	0.049181	1.69908	0.049181	6.69319	0.003214
UVRAG	355	364	KDDGSIAVAL			9	988.531	Apo	0	989	1.13687e-13	0	0	6.70328	0
UVRAG	355	364	KDDGSIAVAL			9	988.531	Apo	0.005	989.771	0.030775	0.771405	0.030775	6.73541	0.00959
UVRAG	355	364	KDDGSIAVAL			9	988.531	Apo	0.05	991.187	0.019711	2.18703	0.019711	6.73095	0.004275
UVRAG	355	364	KDDGSIAVAL			9	988.531	Apo	0.5	992.123	0.068213	3.12273	0.068213	6.72051	0.010271
UVRAG	355	364	KDDGSIAVAL			9	988.531	Apo	5	992.323	0	3.32255	1.13687e-13	6.7453	0
UVRAG	355	364	KDDGSIAVAL			9	988.531	Apo	50	992.286	0.018224	3.28619	0.018224	6.75645	0.0034
UVRAG	355	364	KDDGSIAVAL			9	988.531	Lipids	0	989	1.13687e-13	0	0	6.70328	0
UVRAG	355	364	KDDGSIAVAL			9	988.531	Lipids	0.005	989.754	0.027382	0.754144	0.027382	6.74069	0.016852
UVRAG	355	364	KDDGSIAVAL			9	988.531	Lipids	0.05	991.261	0.068436	2.26077	0.068436	6.74175	0.001869
UVRAG	355	364	KDDGSIAVAL			9	988.531	Lipids	0.5	992.229	0.031516	3.22883	0.031516	6.74491	0.009922
UVRAG	355	364	KDDGSIAVAL			9	988.531	Lipids	5	992.333	0.051083	3.33351	0.051083	6.76255	0.00325
UVRAG	355	364	KDDGSIAVAL			9	988.531	Lipids	50	992.368	0.034746	3.36754	0.034746	6.76815	0.002686
UVRAG	378	384	LQVPLRY			5	888.53	Apo	0	888.976	0	0	0	9.48377	0
UVRAG	378	384	LQVPLRY			5	888.53	Apo	0.005	889.231	0.022019	0.25493	0.022019	9.51216	0.013082
UVRAG	378	384	LQVPLRY			5	888.53	Apo	0.05	889.694	0.016475	0.71775	0.016475	9.50698	0.003951
UVRAG	378	384	LQVPLRY			5	888.53	Apo	0.5	890.192	0.009944	1.216	0.009944	9.50997	0.00329
UVRAG	378	384	LQVPLRY			5	888.53	Apo	5	890.322	0.100196	1.34532	0.100196	9.53351	0.008322
UVRAG	378	384	LQVPLRY			5	888.53	Apo	50	890.352	0.10602	1.37514	0.10602	9.54358	0.002434
UVRAG	378	384	LQVPLRY			5	888.53	Lipids	0	888.976	0	0	0	9.48377	0
UVRAG	378	384	LQVPLRY			5	888.53	Lipids	0.005	889.226	0.010085	0.249422	0.010085	9.51894	0.012458
UVRAG	378	384	LQVPLRY			5	888.53	Lipids	0.05	889.668	0.022201	0.691608	0.022201	9.52142	0.004807
UVRAG	378	384	LQVPLRY			5	888.53	Lipids	0.5	890.222	0.02935	1.24536	0.02935	9.52758	0.007566
UVRAG	378	384	LQVPLRY			5	888.53	Lipids	5	890.287	0.070583	1.31046	0.070583	9.54653	0.005988
UVRAG	378	384	LQVPLRY			5	888.53	Lipids	50	890.341	0.019064	1.36417	0.019064	9.55173	0.001492
UVRAG	421	427	QFDYGVY			6	891.388	Apo	0	891.86	0	0	0	11.102	0
UVRAG	421	427	QFDYGVY			6	891.388	Apo	0.005	891.977	0.029448	0.116503	0.029448	11.1151	0.005985
UVRAG	421	427	QFDYGVY			6	891.388	Apo	0.05	892.164	0.131178	0.303897	0.131178	11.1326	0.028227
UVRAG	421	427	QFDYGVY			6	891.388	Apo	0.5	892.173	0.052892	0.312637	0.052892	11.1085	0.008938
UVRAG	421	427	QFDYGVY			6	891.388	Apo	5	892.573	0.008756	0.712576	0.008756	11.1377	0.007565
UVRAG	421	427	QFDYGVY			6	891.388	Apo	50	892.741	0.067811	0.881122	0.067811	11.1454	0.001723
UVRAG	421	427	QFDYGVY			6	891.388	Lipids	0	891.86	0	0	0	11.102	0
UVRAG	421	427	QFDYGVY			6	891.388	Lipids	0.005	891.996	0.028711	0.135835	0.028711	11.1216	0.005993
UVRAG	421	427	QFDYGVY			6	891.388	Lipids	0.05	892.044	0.018957	0.183785	0.018957	11.1216	0.0101
UVRAG	421	427	QFDYGVY			6	891.388	Lipids	0.5	892.158	0.022241	0.298184	0.022241	11.1275	0.005675
UVRAG	421	427	QFDYGVY			6	891.388	Lipids	5	892.608	0.024682	0.747939	0.024682	11.1418	0.004966
UVRAG	421	427	QFDYGVY			6	891.388	Lipids	50	892.778	0.03265	0.918275	0.03265	11.1449	0.001472
UVRAG	429	436	LNKNIAQL			7	913.547	Apo	0	913.964	0.015646	0	0	8.48773	0.003572
UVRAG	429	436	LNKNIAQL			7	913.547	Apo	0.005	914.122	0.119583	0.158406	0.120602	8.53157	0.014393
UVRAG	429	436	LNKNIAQL			7	913.547	Apo	0.05	914.209	0.024792	0.245489	0.029316	8.53138	0.001949
UVRAG	429	436	LNKNIAQL			7	913.547	Apo	0.5	914.225	0.025505	0.260909	0.029922	8.53288	0.003152
UVRAG	429	436	LNKNIAQL			7	913.547	Apo	5	914.213	0.026469	0.249001	0.030748	8.55569	0.006019
UVRAG	429	436	LNKNIAQL			7	913.547	Apo	50	914.285	0.012006	0.32123	0.019722	8.56762	0.004561
UVRAG	429	436	LNKNIAQL			7	913.547	Lipids	0	913.964	0.015646	0	0	8.48773	0.003572
UVRAG	429	436	LNKNIAQL			7	913.547	Lipids	0.005	914.214	0.033956	0.250209	0.037387	8.53958	0.006718
UVRAG	429	436	LNKNIAQL			7	913.547	Lipids	0.05	914.252	0.017152	0.288302	0.023216	8.54651	0.011504
UVRAG	429	436	LNKNIAQL			7	913.547	Lipids	0.5	914.264	0.023145	0.299707	0.027938	8.55323	0.008529
UVRAG	429	436	LNKNIAQL			7	913.547	Lipids	5	914.27	0.019875	0.306031	0.025294	8.57277	0.006199
UVRAG	429	436	LNKNIAQL			7	913.547	Lipids	50	914.304	0.016902	0.34024	0.023032	8.58047	0.002757
UVRAG	430	436	NKNIAQL			6	800.462	Apo	0	800.859	0	0	0	9.34255	0
UVRAG	430	436	NKNIAQL			6	800.462	Apo	0.005	801.061	0.069902	0.202098	0.069902	9.36517	0.014154
UVRAG	430	436	NKNIAQL			6	800.462	Apo	0.05	801.089	0.023217	0.229517	0.023217	9.37215	0.000962
UVRAG	430	436	NKNIAQL			6	800.462	Apo	0.5	801.01	0.024956	0.151046	0.024956	9.37843	0.000136
UVRAG	430	436	NKNIAQL			6	800.462	Apo	5	801.123	0.035313	0.264177	0.035313	9.40163	0.008561
UVRAG	430	436	NKNIAQL			6	800.462	Apo	50	801.106	0.010155	0.246947	0.010155	9.41338	0.002667
UVRAG	430	436	NKNIAQL			6	800.462	Lipids	0	800.859	0	0	0	9.34255	0
UVRAG	430	436	NKNIAQL			6	800.462	Lipids	0.005	801.044	0.017876	0.18517	0.017876	9.37305	0.012821
UVRAG	430	436	NKNIAQL			6	800.462	Lipids	0.05	801.12	0.073055	0.260442	0.073055	9.39217	0.005747
UVRAG	430	436	NKNIAQL			6	800.462	Lipids	0.5	801.136	0.015018	0.27679	0.015018	9.39461	0.004945
UVRAG	430	436	NKNIAQL			6	800.462	Lipids	5	801.119	0.028627	0.259851	0.028627	9.41828	0.003459
UVRAG	430	436	NKNIAQL			6	800.462	Lipids	50	801.169	0.030596	0.309246	0.030596	9.42586	0.000156
UVRAG	437	447	RYQHGLGTPDL			9	1256.64	Apo	0	1257.34	0	0	0	8.23571	0
UVRAG	437	447	RYQHGLGTPDL			9	1256.64	Apo	0.005	1259.05	0.041806	1.70805	0.041806	8.2768	0.017375
UVRAG	437	447	RYQHGLGTPDL			9	1256.64	Apo	0.05	1259.16	0.033787	1.81667	0.033787	8.26551	0.004655
UVRAG	437	447	RYQHGLGTPDL			9	1256.64	Apo	0.5	1259.23	0.020706	1.89228	0.020706	8.2767	0.006983
UVRAG	437	447	RYQHGLGTPDL			9	1256.64	Apo	5	1259.45	0.026039	2.10701	0.026039	8.31123	0.006662
UVRAG	437	447	RYQHGLGTPDL			9	1256.64	Apo	50	1259.88	0.031518	2.54213	0.031518	8.32757	0.005599
UVRAG	437	447	RYQHGLGTPDL			9	1256.64	Lipids	0	1257.34	0	0	0	8.23571	0
UVRAG	437	447	RYQHGLGTPDL			9	1256.64	Lipids	0.005	1259.1	0.018928	1.75945	0.018928	8.28319	0.008037
UVRAG	437	447	RYQHGLGTPDL			9	1256.64	Lipids	0.05	1259.19	0.01208	1.84871	0.01208	8.29515	0.008938
UVRAG	437	447	RYQHGLGTPDL			9	1256.64	Lipids	0.5	1259.31	0.032193	1.97521	0.032193	8.30414	0.007164
UVRAG	437	447	RYQHGLGTPDL			9	1256.64	Lipids	5	1259.5	0.043038	2.16284	0.043038	8.3336	0.006995
UVRAG	437	447	RYQHGLGTPDL			9	1256.64	Lipids	50	1259.93	0.057727	2.59299	0.057727	8.33802	0.005505
UVRAG	446	458	DLRQTLPNLKNFM			11	1589.85	Apo	0	1590.7	0.055321	0	0	6.37109	0.001294
UVRAG	446	458	DLRQTLPNLKNFM			11	1589.85	Apo	0.005	1591.02	0.066641	0.322934	0.086611	6.39201	0.008883
UVRAG	446	458	DLRQTLPNLKNFM			11	1589.85	Apo	0.05	1591.08	0.051944	0.382595	0.075886	6.39657	0.00431
UVRAG	446	458	DLRQTLPNLKNFM			11	1589.85	Apo	0.5	1591.46	0.062155	0.766909	0.083209	6.39293	0.009452
UVRAG	446	458	DLRQTLPNLKNFM			11	1589.85	Apo	5	1593.04	0.234671	2.34301	0.241104	6.41251	0.009561
UVRAG	446	458	DLRQTLPNLKNFM			11	1589.85	Apo	50	1595.55	0.305808	4.85038	0.310771	6.41061	0.006911
UVRAG	446	458	DLRQTLPNLKNFM			11	1589.85	Lipids	0	1590.7	0.055321	0	0	6.37109	0.001294
UVRAG	446	458	DLRQTLPNLKNFM			11	1589.85	Lipids	0.005	1590.98	0.048557	0.282779	0.073608	6.40416	0.010896
UVRAG	446	458	DLRQTLPNLKNFM			11	1589.85	Lipids	0.05	1591.12	0.061464	0.420278	0.082694	6.41074	0.005621
UVRAG	446	458	DLRQTLPNLKNFM			11	1589.85	Lipids	0.5	1591.47	0.056758	0.774664	0.079259	6.42064	0.007837
UVRAG	446	458	DLRQTLPNLKNFM			11	1589.85	Lipids	5	1593.01	0.223401	2.31769	0.230149	6.42353	0.006199
UVRAG	446	458	DLRQTLPNLKNFM			11	1589.85	Lipids	50	1595.47	0.11412	4.77608	0.126822	6.42523	0.006973
UVRAG	448	456	RQTLPNLKN			7	1083.63	Apo	0	1084.16	0.000493	0	0	6.75824	0.001385
UVRAG	448	456	RQTLPNLKN			7	1083.63	Apo	0.005	1084.44	0.027385	0.282465	0.02739	6.78123	0.01344
UVRAG	448	456	RQTLPNLKN			7	1083.63	Apo	0.05	1084.57	0.053424	0.412735	0.053426	6.78191	0.000921
UVRAG	448	456	RQTLPNLKN			7	1083.63	Apo	0.5	1084.65	0.028629	0.493639	0.028633	6.78264	0.002135
UVRAG	448	456	RQTLPNLKN			7	1083.63	Apo	5	1085.03	0.030696	0.875958	0.0307	6.80007	0.006881
UVRAG	448	456	RQTLPNLKN			7	1083.63	Apo	50	1085.92	0.023198	1.76718	0.023203	6.80815	0.00211
UVRAG	448	456	RQTLPNLKN			7	1083.63	Lipids	0	1084.16	0.000493	0	0	6.75824	0.001385
UVRAG	448	456	RQTLPNLKN			7	1083.63	Lipids	0.005	1084.51	0.043355	0.35658	0.043358	6.79071	0.003198
UVRAG	448	456	RQTLPNLKN			7	1083.63	Lipids	0.05	1084.56	0.057683	0.405661	0.057685	6.79294	0.006527
UVRAG	448	456	RQTLPNLKN			7	1083.63	Lipids	0.5	1084.63	0.037931	0.471825	0.037934	6.80077	0.008698
UVRAG	448	456	RQTLPNLKN			7	1083.63	Lipids	5	1085.04	0.07173	0.880428	0.071731	6.8137	0.003286
UVRAG	448	456	RQTLPNLKN			7	1083.63	Lipids	50	1085.92	0.014895	1.76641	0.014903	6.81431	0.005391
UVRAG	448	457	RQTLPNLKNF			8	1230.7	Apo	0	1231.27	0.016044	0	0	9.59748	0.005687
UVRAG	448	457	RQTLPNLKNF			8	1230.7	Apo	0.005	1231.62	0.046838	0.352307	0.049509	9.62342	0.015922
UVRAG	448	457	RQTLPNLKNF			8	1230.7	Apo	0.05	1231.76	0.056276	0.486889	0.058518	9.63069	0.005226
UVRAG	448	457	RQTLPNLKNF			8	1230.7	Apo	0.5	1231.87	0.075492	0.600712	0.077178	9.63425	0.011936
UVRAG	448	457	RQTLPNLKNF			8	1230.7	Apo	5	1232.42	0.045578	1.14542	0.04832	9.66793	0.008327
UVRAG	448	457	RQTLPNLKNF			8	1230.7	Apo	50	1233.42	0.095645	2.14524	0.096981	9.67882	0.004585
UVRAG	448	457	RQTLPNLKNF			8	1230.7	Lipids	0	1231.27	0.016044	0	0	9.59748	0.005687
UVRAG	448	457	RQTLPNLKNF			8	1230.7	Lipids	0.005	1231.63	0.098383	0.355834	0.099682	9.65136	0.005342
UVRAG	448	457	RQTLPNLKNF			8	1230.7	Lipids	0.05	1231.73	0.053573	0.457668	0.055924	9.64368	0.009485
UVRAG	448	457	RQTLPNLKNF			8	1230.7	Lipids	0.5	1231.89	0.037244	0.621385	0.040553	9.65862	0.005093
UVRAG	448	457	RQTLPNLKNF			8	1230.7	Lipids	5	1232.38	0.060161	1.10903	0.062264	9.68009	0.005974
UVRAG	448	457	RQTLPNLKNF			8	1230.7	Lipids	50	1233.38	0.074847	2.11064	0.076547	9.69129	0.005783
UVRAG	448	458	RQTLPNLKNFM			9	1361.74	Apo	0	1362.3	0	0	0	7.31786	0
UVRAG	448	458	RQTLPNLKNFM			9	1361.74	Apo	0.005	1364.23	0.026697	1.93485	0.026697	7.3472	0.01421
UVRAG	448	458	RQTLPNLKNFM			9	1361.74	Apo	0.05	1364.64	0.063159	2.34357	0.063159	7.35077	0.002179
UVRAG	448	458	RQTLPNLKNFM			9	1361.74	Apo	0.5	1364.65	0.070521	2.34961	0.070521	7.35489	0.004904
UVRAG	448	458	RQTLPNLKNFM			9	1361.74	Apo	5	1364.78	0.073559	2.47899	0.073559	7.37419	0.00806
UVRAG	448	458	RQTLPNLKNFM			9	1361.74	Apo	50	1364.96	0.039375	2.66005	0.039375	7.38327	0.002518
UVRAG	448	458	RQTLPNLKNFM			9	1361.74	Lipids	0	1362.3	0	0	0	7.31786	0
UVRAG	448	458	RQTLPNLKNFM			9	1361.74	Lipids	0.005	1364.3	0.054193	1.99867	0.054193	7.37778	0.035017
UVRAG	448	458	RQTLPNLKNFM			9	1361.74	Lipids	0.05	1364.65	0.056247	2.35551	0.056247	7.37229	0.009885
UVRAG	448	458	RQTLPNLKNFM			9	1361.74	Lipids	0.5	1364.72	0.069874	2.42694	0.069874	7.3672	0.01231
UVRAG	448	458	RQTLPNLKNFM			9	1361.74	Lipids	5	1364.97	0.100128	2.66789	0.100128	7.38255	0.005047
UVRAG	448	458	RQTLPNLKNFM			9	1361.74	Lipids	50	1365.02	0.048381	2.72501	0.048381	7.39166	0.004987
UVRAG	452	463	PNLKNFMEHGLM			10	1430.69	Apo	0	1431.62	0.035661	0	0	11.6703	0.007058
UVRAG	452	463	PNLKNFMEHGLM			10	1430.69	Apo	0.005	1432.57	0.116315	0.947239	0.121658	11.6905	0.025978
UVRAG	452	463	PNLKNFMEHGLM			10	1430.69	Apo	0.05	1433.05	0.051264	1.42746	0.062448	11.6915	0.005367
UVRAG	452	463	PNLKNFMEHGLM			10	1430.69	Apo	0.5	1433.45	0.047862	1.82675	0.059686	11.7133	0.011814
UVRAG	452	463	PNLKNFMEHGLM			10	1430.69	Apo	5	1434.04	0.04377	2.41303	0.056458	11.7768	0.025289
UVRAG	452	463	PNLKNFMEHGLM			10	1430.69	Apo	50	1434.87	0.041202	3.2492	0.054491	11.8608	0.041438
UVRAG	452	463	PNLKNFMEHGLM			10	1430.69	Lipids	0	1431.62	0.035661	0	0	11.6703	0.007058
UVRAG	452	463	PNLKNFMEHGLM			10	1430.69	Lipids	0.005	1432.56	0.051278	0.938251	0.062459	11.6988	0.012543
UVRAG	452	463	PNLKNFMEHGLM			10	1430.69	Lipids	0.05	1433.11	0.040035	1.48453	0.053614	11.7146	0.019188
UVRAG	452	463	PNLKNFMEHGLM			10	1430.69	Lipids	0.5	1433.53	0.041094	1.90608	0.05441	11.7155	0.022227
UVRAG	452	463	PNLKNFMEHGLM			10	1430.69	Lipids	5	1434.08	0.088567	2.45634	0.095477	11.7972	0.007798
UVRAG	452	463	PNLKNFMEHGLM			10	1430.69	Lipids	50	1434.94	0.103586	3.3207	0.109552	11.8915	0.036686
UVRAG	457	463	FMEHGLM			6	864.374	Apo	0	865.024	0.067515	0	0	9.80503	0.000856
UVRAG	457	463	FMEHGLM			6	864.374	Apo	0.005	865.498	0.029992	0.474516	0.073877	9.82779	0.014885
UVRAG	457	463	FMEHGLM			6	864.374	Apo	0.05	865.987	0.027889	0.963634	0.073049	9.83735	0.001611
UVRAG	457	463	FMEHGLM			6	864.374	Apo	0.5	866.198	0.022618	1.17415	0.071203	9.8412	0.005056
UVRAG	457	463	FMEHGLM			6	864.374	Apo	5	866.266	0.027654	1.24186	0.072959	9.87108	0.005867
UVRAG	457	463	FMEHGLM			6	864.374	Apo	50	866.469	0.018416	1.44522	0.069982	9.89358	0.004835
UVRAG	457	463	FMEHGLM			6	864.374	Lipids	0	865.024	0.067515	0	0	9.80503	0.000856
UVRAG	457	463	FMEHGLM			6	864.374	Lipids	0.005	865.506	0.065136	0.482676	0.093814	9.85185	0.009534
UVRAG	457	463	FMEHGLM			6	864.374	Lipids	0.05	866.02	0.055888	0.996543	0.087646	9.85979	0.005541
UVRAG	457	463	FMEHGLM			6	864.374	Lipids	0.5	866.234	0.0519	1.2103	0.085158	9.86002	0.004707
UVRAG	457	463	FMEHGLM			6	864.374	Lipids	5	866.339	0.073424	1.31496	0.099746	9.88475	0.004874
UVRAG	457	463	FMEHGLM			6	864.374	Lipids	50	866.481	0.060217	1.45774	0.090468	9.90569	0.002574
UVRAG	480	492	RQSSIFGGADVGF			12	1340.66	Apo	0	1341.32	0	0	0	11.0562	0
UVRAG	480	492	RQSSIFGGADVGF			12	1340.66	Apo	0.005	1341.72	0.099785	0.394094	0.099785	11.0759	0.013163
UVRAG	480	492	RQSSIFGGADVGF			12	1340.66	Apo	0.05	1341.99	0.008188	0.667496	0.008188	11.0751	0.004634
UVRAG	480	492	RQSSIFGGADVGF			12	1340.66	Apo	0.5	1342.22	0.024664	0.897811	0.024664	11.0821	0.013551
UVRAG	480	492	RQSSIFGGADVGF			12	1340.66	Apo	5	1342.66	0.104237	1.3343	0.104237	11.1261	0.015622
UVRAG	480	492	RQSSIFGGADVGF			12	1340.66	Apo	50	1343.5	0.012269	2.17443	0.012269	11.148	0.010884
UVRAG	480	492	RQSSIFGGADVGF			12	1340.66	Lipids	0	1341.32	0	0	0	11.0562	0
UVRAG	480	492	RQSSIFGGADVGF			12	1340.66	Lipids	0.005	1341.66	0.102946	0.332004	0.102946	11.0855	0.013311
UVRAG	480	492	RQSSIFGGADVGF			12	1340.66	Lipids	0.05	1342.05	0.02804	0.727304	0.02804	11.0919	0.012236
UVRAG	480	492	RQSSIFGGADVGF			12	1340.66	Lipids	0.5	1342.22	0.135399	0.89847	0.135399	11.106	0.001274
UVRAG	480	492	RQSSIFGGADVGF			12	1340.66	Lipids	5	1342.67	0.0748	1.35141	0.0748	11.1326	0.001686
UVRAG	480	492	RQSSIFGGADVGF			12	1340.66	Lipids	50	1343.63	0.145214	2.30736	0.145214	11.1654	0.009129
UVRAG	482	488	SSIFGGA			6	638.314	Apo	0	638.677	0	0	0	6.51087	0
UVRAG	482	488	SSIFGGA			6	638.314	Apo	0.005	638.757	0.027634	0.080426	0.027634	6.51262	0.004872
UVRAG	482	488	SSIFGGA			6	638.314	Apo	0.05	638.949	0.0121	0.272438	0.0121	6.51491	0.003321
UVRAG	482	488	SSIFGGA			6	638.314	Apo	0.5	639.192	0.014412	0.514992	0.014412	6.50727	0.006237
UVRAG	482	488	SSIFGGA			6	638.314	Apo	5	639.243	0.010615	0.565604	0.010615	6.52383	0.004912
UVRAG	482	488	SSIFGGA			6	638.314	Apo	50	639.526	0.018242	0.849344	0.018242	6.52791	0.000249
UVRAG	482	488	SSIFGGA			6	638.314	Lipids	0	638.677	0	0	0	6.51087	0
UVRAG	482	488	SSIFGGA			6	638.314	Lipids	0.005	638.729	0.033404	0.052451	0.033404	6.5148	0.011236
UVRAG	482	488	SSIFGGA			6	638.314	Lipids	0.05	638.982	0.023417	0.304728	0.023417	6.51783	0.00429
UVRAG	482	488	SSIFGGA			6	638.314	Lipids	0.5	639.165	0.016583	0.488197	0.016583	6.52001	0.007215
UVRAG	482	488	SSIFGGA			6	638.314	Lipids	5	639.175	0.047011	0.498085	0.047011	6.5279	0.002205
UVRAG	482	488	SSIFGGA			6	638.314	Lipids	50	639.408	0.033487	0.731185	0.033487	6.52757	0.003737
UVRAG	490	512	VGFSGGIPSPDKGHRKRASSENE			20	2412.2	Apo	0	2413.47	0.024115	0	0	6.53507	0.000443
UVRAG	490	512	VGFSGGIPSPDKGHRKRASSENE			20	2412.2	Apo	0.005	2418.87	0.064242	5.39603	0.068619	6.55964	0.017003
UVRAG	490	512	VGFSGGIPSPDKGHRKRASSENE			20	2412.2	Apo	0.05	2418.85	0.189908	5.37462	0.191433	6.56318	0.004038
UVRAG	490	512	VGFSGGIPSPDKGHRKRASSENE			20	2412.2	Apo	0.5	2418.82	0.235204	5.34737	0.236437	6.56037	0.006814
UVRAG	490	512	VGFSGGIPSPDKGHRKRASSENE			20	2412.2	Apo	5	2419.09	0.096349	5.62067	0.099321	6.587	0.009863
UVRAG	490	512	VGFSGGIPSPDKGHRKRASSENE			20	2412.2	Apo	50	2418.91	0.095082	5.43433	0.098092	6.6003	0.008682
UVRAG	490	512	VGFSGGIPSPDKGHRKRASSENE			20	2412.2	Lipids	0	2413.47	0.024115	0	0	6.53507	0.000443
UVRAG	490	512	VGFSGGIPSPDKGHRKRASSENE			20	2412.2	Lipids	0.005	2418.95	0.073611	5.47811	0.077461	6.57846	0.004793
UVRAG	490	512	VGFSGGIPSPDKGHRKRASSENE			20	2412.2	Lipids	0.05	2418.75	0.172785	5.27876	0.174459	6.57429	0.007965
UVRAG	490	512	VGFSGGIPSPDKGHRKRASSENE			20	2412.2	Lipids	0.5	2419.01	0.061356	5.53972	0.065925	6.58836	0.005822
UVRAG	490	512	VGFSGGIPSPDKGHRKRASSENE			20	2412.2	Lipids	5	2419.27	0.16932	5.80037	0.171029	6.60537	0.004316
UVRAG	490	512	VGFSGGIPSPDKGHRKRASSENE			20	2412.2	Lipids	50	2419.15	0.168821	5.67987	0.170534	6.62071	0.004849
UVRAG	497	510	PSPDKGHRKRASSE			11	1551.8	Apo	0	1552.57	2.27374e-13	0	0	6.49709	0
UVRAG	497	510	PSPDKGHRKRASSE			11	1551.8	Apo	0.005	1556.02	0.084017	3.45616	0.084017	6.52949	0.013367
UVRAG	497	510	PSPDKGHRKRASSE			11	1551.8	Apo	0.05	1556.14	0.0476	3.57793	0.0476	6.53652	0.006439
UVRAG	497	510	PSPDKGHRKRASSE			11	1551.8	Apo	0.5	1556.22	0.051094	3.64939	0.051094	6.52563	0.007083
UVRAG	497	510	PSPDKGHRKRASSE			11	1551.8	Apo	5	1556.43	0.11627	3.86261	0.11627	6.55717	0.009537
UVRAG	497	510	PSPDKGHRKRASSE			11	1551.8	Apo	50	1556.39	0.122739	3.82201	0.122739	6.56989	0.011844
UVRAG	497	510	PSPDKGHRKRASSE			11	1551.8	Lipids	0	1552.57	2.27374e-13	0	0	6.49709	0
UVRAG	497	510	PSPDKGHRKRASSE			11	1551.8	Lipids	0.005	1556.24	0.103693	3.673	0.103693	6.54705	0.011838
UVRAG	497	510	PSPDKGHRKRASSE			11	1551.8	Lipids	0.05	1556.32	0.057256	3.75663	0.057256	6.54556	0.008098
UVRAG	497	510	PSPDKGHRKRASSE			11	1551.8	Lipids	0.5	1556.31	0.070809	3.74491	0.070809	6.55518	0.004564
UVRAG	497	510	PSPDKGHRKRASSE			11	1551.8	Lipids	5	1556.58	0.189242	4.01132	0.189242	6.56738	0.005805
UVRAG	497	510	PSPDKGHRKRASSE			11	1551.8	Lipids	50	1556.43	0.156008	3.86015	0.156008	6.5843	0.005496
UVRAG	497	511	PSPDKGHRKRASSEN			12	1665.84	Apo	0	1666.72	0.004037	0	0	6.45874	0.001653
UVRAG	497	511	PSPDKGHRKRASSEN			12	1665.84	Apo	0.005	1670.61	0.066453	3.88208	0.066575	6.48525	0.009608
UVRAG	497	511	PSPDKGHRKRASSEN			12	1665.84	Apo	0.05	1670.78	0.049386	4.06034	0.049551	6.48913	0.001899
UVRAG	497	511	PSPDKGHRKRASSEN			12	1665.84	Apo	0.5	1670.8	0.085774	4.08078	0.085869	6.48489	0.004694
UVRAG	497	511	PSPDKGHRKRASSEN			12	1665.84	Apo	5	1670.79	0.053179	4.06993	0.053332	6.51276	0.009952
UVRAG	497	511	PSPDKGHRKRASSEN			12	1665.84	Apo	50	1670.91	0.145889	4.18867	0.145945	6.52073	0.005501
UVRAG	497	511	PSPDKGHRKRASSEN			12	1665.84	Lipids	0	1666.72	0.004037	0	0	6.45874	0.001653
UVRAG	497	511	PSPDKGHRKRASSEN			12	1665.84	Lipids	0.005	1670.75	0.108729	4.02382	0.108804	6.49689	0.012721
UVRAG	497	511	PSPDKGHRKRASSEN			12	1665.84	Lipids	0.05	1670.74	0.099284	4.0181	0.099366	6.50295	0.005048
UVRAG	497	511	PSPDKGHRKRASSEN			12	1665.84	Lipids	0.5	1670.87	0.092662	4.14399	0.09275	6.51138	0.007502
UVRAG	497	511	PSPDKGHRKRASSEN			12	1665.84	Lipids	5	1671.01	0.135675	4.28261	0.135735	6.52466	0.005268
UVRAG	497	511	PSPDKGHRKRASSEN			12	1665.84	Lipids	50	1670.96	0.074737	4.23589	0.074846	6.53674	0.004283
UVRAG	515	526	QYKTPPPSYNSA			8	1352.65	Apo	0	1353.25	0.02771	0	0	6.57351	0.000604
UVRAG	515	526	QYKTPPPSYNSA			8	1352.65	Apo	0.005	1357.19	0.01521	3.9447	0.03161	6.58548	0.002282
UVRAG	515	526	QYKTPPPSYNSA			8	1352.65	Apo	0.05	1357.23	0.059597	3.98423	0.065724	6.57797	0.003271
UVRAG	515	526	QYKTPPPSYNSA			8	1352.65	Apo	0.5	1357.28	0.038115	4.03336	0.047123	6.57775	0.005557
UVRAG	515	526	QYKTPPPSYNSA			8	1352.65	Apo	5	1357.23	0.014988	3.98571	0.031503	6.59243	0.008072
UVRAG	515	526	QYKTPPPSYNSA			8	1352.65	Apo	50	1357.23	0.005264	3.98594	0.028205	6.59859	0.0022
UVRAG	515	526	QYKTPPPSYNSA			8	1352.65	Lipids	0	1353.25	0.02771	0	0	6.57351	0.000604
UVRAG	515	526	QYKTPPPSYNSA			8	1352.65	Lipids	0.005	1357.23	0.017292	3.98125	0.032663	6.58773	0.007083
UVRAG	515	526	QYKTPPPSYNSA			8	1352.65	Lipids	0.05	1357.24	0.047927	3.99491	0.055361	6.58996	0.002458
UVRAG	515	526	QYKTPPPSYNSA			8	1352.65	Lipids	0.5	1357.28	0.041618	4.02875	0.049999	6.6001	0.002518
UVRAG	515	526	QYKTPPPSYNSA			8	1352.65	Lipids	5	1357.27	0.072077	4.02296	0.07722	6.60299	0.00408
UVRAG	515	526	QYKTPPPSYNSA			8	1352.65	Lipids	50	1357.27	0.021182	4.01938	0.034879	6.60134	0.000901
UVRAG	530	547	PVTTVPSMGETERKITSL			15	1946.03	Apo	0	1947.11	0	0	0	10.4496	0
UVRAG	530	547	PVTTVPSMGETERKITSL			15	1946.03	Apo	0.005	1955.22	0.106248	8.10221	0.106248	10.4261	0.008682
UVRAG	530	547	PVTTVPSMGETERKITSL			15	1946.03	Apo	0.05	1955.34	0.044366	8.22965	0.044366	10.4055	0.004504
UVRAG	530	547	PVTTVPSMGETERKITSL			15	1946.03	Apo	0.5	1955.41	0.028917	8.29289	0.028917	10.403	0.022057
UVRAG	530	547	PVTTVPSMGETERKITSL			15	1946.03	Apo	5	1955.48	0.081129	8.36488	0.081129	10.4434	0.009518
UVRAG	530	547	PVTTVPSMGETERKITSL			15	1946.03	Apo	50	1955.66	0.04087	8.54327	0.04087	10.4543	0.004297
UVRAG	530	547	PVTTVPSMGETERKITSL			15	1946.03	Lipids	0	1947.11	0	0	0	10.4496	0
UVRAG	530	547	PVTTVPSMGETERKITSL			15	1946.03	Lipids	0.005	1955.22	0.165333	8.10372	0.165333	10.399	0.019172
UVRAG	530	547	PVTTVPSMGETERKITSL			15	1946.03	Lipids	0.05	1955.52	0.130549	8.40658	0.130549	10.4218	0.007288
UVRAG	530	547	PVTTVPSMGETERKITSL			15	1946.03	Lipids	0.5	1955.52	0.05543	8.40338	0.05543	10.4273	0.008955
UVRAG	530	547	PVTTVPSMGETERKITSL			15	1946.03	Lipids	5	1955.58	0.095541	8.47083	0.095541	10.4509	0.00782
UVRAG	530	547	PVTTVPSMGETERKITSL			15	1946.03	Lipids	50	1955.76	0.056011	8.65105	0.056011	10.4554	0.005275
UVRAG	543	552	KITSLSSSLD			9	1050.57	Apo	0	1051.24	0	0	0	5.40685	0
UVRAG	543	552	KITSLSSSLD			9	1050.57	Apo	0.005	1051.31	0.051581	0.071341	0.051581	5.4229	0.005888
UVRAG	543	552	KITSLSSSLD			9	1050.57	Apo	0.05	1051.38	0.066033	0.139956	0.066033	5.42829	0.001946
UVRAG	543	552	KITSLSSSLD			9	1050.57	Apo	0.5	1051.36	0.057684	0.121059	0.057684	5.42929	0.004378
UVRAG	543	552	KITSLSSSLD			9	1050.57	Apo	5	1051.45	0.036594	0.20629	0.036594	5.45281	0.003603
UVRAG	543	552	KITSLSSSLD			9	1050.57	Apo	50	1051.82	0.026436	0.582172	0.026436	5.45624	0.003448
UVRAG	543	552	KITSLSSSLD			9	1050.57	Lipids	0	1051.24	0	0	0	5.40685	0
UVRAG	543	552	KITSLSSSLD			9	1050.57	Lipids	0.005	1051.35	0.046559	0.108283	0.046559	5.4258	0.005867
UVRAG	543	552	KITSLSSSLD			9	1050.57	Lipids	0.05	1051.35	0.075552	0.104472	0.075552	5.43805	0.011562
UVRAG	543	552	KITSLSSSLD			9	1050.57	Lipids	0.5	1051.41	0.066254	0.167018	0.066254	5.44718	0.008142
UVRAG	543	552	KITSLSSSLD			9	1050.57	Lipids	5	1051.45	0.072102	0.204675	0.072102	5.45857	0.003218
UVRAG	543	552	KITSLSSSLD			9	1050.57	Lipids	50	1051.84	0.008436	0.601062	0.008436	5.47247	0.001147
UVRAG	554	565	SLDFSKENKKKG			11	1380.75	Apo	0	1381.42	0.044762	0	0	6.94706	0.002383
UVRAG	554	565	SLDFSKENKKKG			11	1380.75	Apo	0.005	1381.62	0.057427	0.19955	0.072811	6.99755	0.017419
UVRAG	554	565	SLDFSKENKKKG			11	1380.75	Apo	0.05	1381.64	0.064932	0.227857	0.078866	7.02566	0.004193
UVRAG	554	565	SLDFSKENKKKG			11	1380.75	Apo	0.5	1381.74	0.104277	0.319033	0.113478	7.03365	0.009319
UVRAG	554	565	SLDFSKENKKKG			11	1380.75	Apo	5	1382.48	0.0402	1.06015	0.060164	7.06577	0.0075
UVRAG	554	565	SLDFSKENKKKG			11	1380.75	Apo	50	1383.75	0.120263	2.33485	0.128323	7.09802	0.008338
UVRAG	554	565	SLDFSKENKKKG			11	1380.75	Lipids	0	1381.42	0.044762	0	0	6.94706	0.002383
UVRAG	554	565	SLDFSKENKKKG			11	1380.75	Lipids	0.005	1381.6	0.011533	0.186699	0.046224	7.03711	0.004197
UVRAG	554	565	SLDFSKENKKKG			11	1380.75	Lipids	0.05	1381.68	0.029754	0.259782	0.053749	7.04306	0.003012
UVRAG	554	565	SLDFSKENKKKG			11	1380.75	Lipids	0.5	1381.79	0.052178	0.375054	0.068747	7.0744	0.004868
UVRAG	554	565	SLDFSKENKKKG			11	1380.75	Lipids	5	1382.49	0.028311	1.06891	0.052964	7.09399	0.007512
UVRAG	554	565	SLDFSKENKKKG			11	1380.75	Lipids	50	1383.9	0.097928	2.48115	0.107673	7.12185	0.007667
UVRAG	557	568	FSKENKKKGEDL			11	1422.76	Apo	0	1423.43	0.085177	0	0	4.98102	0.002467
UVRAG	557	568	FSKENKKKGEDL			11	1422.76	Apo	0.005	1426.3	0.147193	2.8721	0.170061	4.98247	0.006149
UVRAG	557	568	FSKENKKKGEDL			11	1422.76	Apo	0.05	1426.26	0.065561	2.82961	0.107486	4.98742	0.002071
UVRAG	557	568	FSKENKKKGEDL			11	1422.76	Apo	0.5	1426.28	0.117797	2.84334	0.145365	4.98851	0.003674
UVRAG	557	568	FSKENKKKGEDL			11	1422.76	Apo	5	1426.42	0.164972	2.98234	0.185663	4.99901	0.007128
UVRAG	557	568	FSKENKKKGEDL			11	1422.76	Apo	50	1426.36	0.145546	2.92298	0.168638	5.00492	0.003168
UVRAG	557	568	FSKENKKKGEDL			11	1422.76	Lipids	0	1423.43	0.085177	0	0	4.98102	0.002467
UVRAG	557	568	FSKENKKKGEDL			11	1422.76	Lipids	0.005	1426.39	0.102879	2.95815	0.133563	4.98369	0.006132
UVRAG	557	568	FSKENKKKGEDL			11	1422.76	Lipids	0.05	1426.36	0.065453	2.92225	0.10742	4.99649	0.006432
UVRAG	557	568	FSKENKKKGEDL			11	1422.76	Lipids	0.5	1426.28	0.120068	2.84849	0.147212	5.00246	0.003851
UVRAG	557	568	FSKENKKKGEDL			11	1422.76	Lipids	5	1426.66	0.057758	3.2238	0.102913	5.00788	0.002258
UVRAG	557	568	FSKENKKKGEDL			11	1422.76	Lipids	50	1426.52	0.185425	3.08737	0.204053	5.00807	0.00305
UVRAG	570	581	GSLNGGHANVHP			10	1159.56	Apo	0	1160.17	0	0	0	7.45936	0
UVRAG	570	581	GSLNGGHANVHP			10	1159.56	Apo	0.005	1163.8	0.041865	3.63622	0.041865	7.47713	0.015612
UVRAG	570	581	GSLNGGHANVHP			10	1159.56	Apo	0.05	1163.92	0.055791	3.7556	0.055791	7.47475	0.004168
UVRAG	570	581	GSLNGGHANVHP			10	1159.56	Apo	0.5	1164.01	0.003969	3.846	0.003969	7.4778	0.00779
UVRAG	570	581	GSLNGGHANVHP			10	1159.56	Apo	5	1164.05	0.084219	3.87984	0.084219	7.5012	0.009713
UVRAG	570	581	GSLNGGHANVHP			10	1159.56	Apo	50	1164.01	0.074611	3.84239	0.074611	7.51143	0.004027
UVRAG	570	581	GSLNGGHANVHP			10	1159.56	Lipids	0	1160.17	0	0	0	7.45936	0
UVRAG	570	581	GSLNGGHANVHP			10	1159.56	Lipids	0.005	1163.84	0	3.67404	0	7.49196	0
UVRAG	570	581	GSLNGGHANVHP			10	1159.56	Lipids	0.05	1164.05	0.060243	3.8808	0.060243	7.49013	0.008351
UVRAG	570	581	GSLNGGHANVHP			10	1159.56	Lipids	0.5	1164.03	0.066586	3.86574	0.066586	7.4983	0.008345
UVRAG	570	581	GSLNGGHANVHP			10	1159.56	Lipids	5	1164.07	0.101593	3.8988	0.101593	7.51658	0.000188
UVRAG	570	581	GSLNGGHANVHP			10	1159.56	Lipids	50	1164.12	0	3.94837	0	7.52462	0
UVRAG	581	591	PSQEQGEALSG			9	1102.5	Apo	0	1102.91	0.036914	0	0	10.3697	0.001392
UVRAG	581	591	PSQEQGEALSG			9	1102.5	Apo	0.005	1103.23	0.088956	0.321403	0.096311	10.42	0.012321
UVRAG	581	591	PSQEQGEALSG			9	1102.5	Apo	0.05	1103.34	0.118571	0.43527	0.124185	10.4057	0.003442
UVRAG	581	591	PSQEQGEALSG			9	1102.5	Apo	0.5	1103.56	0.152829	0.656867	0.157224	10.4135	0.009482
UVRAG	581	591	PSQEQGEALSG			9	1102.5	Apo	5	1104.42	0.079517	1.51529	0.087667	10.4467	0.011931
UVRAG	581	591	PSQEQGEALSG			9	1102.5	Apo	50	1104.9	0.232895	1.99258	0.235802	10.4607	0.005877
UVRAG	581	591	PSQEQGEALSG			9	1102.5	Lipids	0	1102.91	0.036914	0	0	10.3697	0.001392
UVRAG	581	591	PSQEQGEALSG			9	1102.5	Lipids	0.005	1103.23	0.074917	0.325641	0.083518	10.4286	0.009211
UVRAG	581	591	PSQEQGEALSG			9	1102.5	Lipids	0.05	1103.5	0.103351	0.592642	0.109746	10.433	0.00901
UVRAG	581	591	PSQEQGEALSG			9	1102.5	Lipids	0.5	1103.69	0.056436	0.788288	0.067437	10.4388	0.00933
UVRAG	581	591	PSQEQGEALSG			9	1102.5	Lipids	5	1104.4	0.098331	1.49347	0.105031	10.4627	0.004616
UVRAG	581	591	PSQEQGEALSG			9	1102.5	Lipids	50	1105.21	0.088384	2.30559	0.095783	10.4736	0.004434
UVRAG	590	599	SGHRATVNGT			9	999.497	Apo	0	1000.02	0	0	0	10.2612	0
UVRAG	590	599	SGHRATVNGT			9	999.497	Apo	0.005	1000.21	0.044333	0.190064	0.044333	10.3162	0.010128
UVRAG	590	599	SGHRATVNGT			9	999.497	Apo	0.05	1000.34	0.007639	0.321812	0.007639	10.3052	0.001446
UVRAG	590	599	SGHRATVNGT			9	999.497	Apo	0.5	1000.44	0.02781	0.417001	0.02781	10.3122	0.008048
UVRAG	590	599	SGHRATVNGT			9	999.497	Apo	5	1000.96	0.016472	0.943298	0.016472	10.3456	0.010049
UVRAG	590	599	SGHRATVNGT			9	999.497	Apo	50	1001.51	0.038869	1.49024	0.038869	10.3582	0.002566
UVRAG	590	599	SGHRATVNGT			9	999.497	Lipids	0	1000.02	0	0	0	10.2612	0
UVRAG	590	599	SGHRATVNGT			9	999.497	Lipids	0.005	1000.23	0.018386	0.211435	0.018386	10.3246	0.012289
UVRAG	590	599	SGHRATVNGT			9	999.497	Lipids	0.05	1000.38	0.022441	0.359333	0.022441	10.3285	0.009223
UVRAG	590	599	SGHRATVNGT			9	999.497	Lipids	0.5	1000.47	0.013831	0.448095	0.013831	10.3409	0.004248
UVRAG	590	599	SGHRATVNGT			9	999.497	Lipids	5	1000.97	0.031943	0.954869	0.031943	10.3613	0.003598
UVRAG	590	599	SGHRATVNGT			9	999.497	Lipids	50	1001.58	0.010277	1.561	0.010277	10.3739	0.003163
UVRAG	602	609	PSEQAGSA			6	746.332	Apo	0	746.659	0	0	0	4.89021	0
UVRAG	602	609	PSEQAGSA			6	746.332	Apo	0.005	749.785	0.035802	3.12654	0.035802	4.88294	0.000948
UVRAG	602	609	PSEQAGSA			6	746.332	Apo	0.05	749.718	0.01677	3.05915	0.01677	4.88224	0.002319
UVRAG	602	609	PSEQAGSA			6	746.332	Apo	0.5	749.727	0.018951	3.06802	0.018951	4.88184	0.003973
UVRAG	602	609	PSEQAGSA			6	746.332	Apo	5	749.708	0.018835	3.04962	0.018835	4.88775	0.005633
UVRAG	602	609	PSEQAGSA			6	746.332	Apo	50	749.684	0.011586	3.02548	0.011586	4.88299	0.003431
UVRAG	602	609	PSEQAGSA			6	746.332	Lipids	0	746.659	0	0	0	4.89021	0
UVRAG	602	609	PSEQAGSA			6	746.332	Lipids	0.005	749.74	0.02225	3.08104	0.02225	4.88066	0.000843
UVRAG	602	609	PSEQAGSA			6	746.332	Lipids	0.05	749.735	0.030941	3.07602	0.030941	4.88415	0.004245
UVRAG	602	609	PSEQAGSA			6	746.332	Lipids	0.5	749.717	0.011311	3.0584	0.011311	4.88945	0.000701
UVRAG	602	609	PSEQAGSA			6	746.332	Lipids	5	749.746	0.041993	3.08744	0.041993	4.88532	0.001853
UVRAG	602	609	PSEQAGSA			6	746.332	Lipids	50	749.697	0.033924	3.03791	0.033924	4.88323	0.00013
UVRAG	610	617	SVQLPGEF			6	876.446	Apo	0	876.876	0.043416	0	0	11.0314	0.00163
UVRAG	610	617	SVQLPGEF			6	876.446	Apo	0.005	879.376	0.030936	2.50051	0.05331	11.0415	0.005279
UVRAG	610	617	SVQLPGEF			6	876.446	Apo	0.05	879.407	0.076135	2.5314	0.087644	11.0364	0.003534
UVRAG	610	617	SVQLPGEF			6	876.446	Apo	0.5	879.439	0.029083	2.56314	0.052257	11.0407	0.004863
UVRAG	610	617	SVQLPGEF			6	876.446	Apo	5	879.445	0.052113	2.56928	0.067829	11.0624	0.00753
UVRAG	610	617	SVQLPGEF			6	876.446	Apo	50	879.448	0.038724	2.57188	0.058177	11.0696	0.002779
UVRAG	610	617	SVQLPGEF			6	876.446	Lipids	0	876.876	0.043416	0	0	11.0314	0.00163
UVRAG	610	617	SVQLPGEF			6	876.446	Lipids	0.005	879.368	0.01393	2.49232	0.045596	11.0452	0.010049
UVRAG	610	617	SVQLPGEF			6	876.446	Lipids	0.05	879.406	0.035734	2.53036	0.056231	11.0509	0.006508
UVRAG	610	617	SVQLPGEF			6	876.446	Lipids	0.5	879.456	0.037426	2.58007	0.057321	11.0503	0.005556
UVRAG	610	617	SVQLPGEF			6	876.446	Lipids	5	879.44	0.068413	2.56422	0.081027	11.0682	0.003361
UVRAG	610	617	SVQLPGEF			6	876.446	Lipids	50	879.406	0.104423	2.53042	0.113089	11.0727	0.003704
UVRAG	611	617	VQLPGEF			5	789.414	Apo	0	789.787	0	0	0	11.0191	0
UVRAG	611	617	VQLPGEF			5	789.414	Apo	0.005	791.824	0.023239	2.0372	0.023239	11.0285	0.00377
UVRAG	611	617	VQLPGEF			5	789.414	Apo	0.05	791.927	0.036976	2.14044	0.036976	11.0196	0.002966
UVRAG	611	617	VQLPGEF			5	789.414	Apo	0.5	791.947	0.054496	2.16028	0.054496	11.025	0.004621
UVRAG	611	617	VQLPGEF			5	789.414	Apo	5	791.94	0.039434	2.15307	0.039434	11.0477	0.004964
UVRAG	611	617	VQLPGEF			5	789.414	Apo	50	791.959	0.090769	2.17171	0.090769	11.0561	0.001405
UVRAG	611	617	VQLPGEF			5	789.414	Lipids	0	789.787	0	0	0	11.0191	0
UVRAG	611	617	VQLPGEF			5	789.414	Lipids	0.005	791.837	0.021402	2.05068	0.021402	11.0333	0.007896
UVRAG	611	617	VQLPGEF			5	789.414	Lipids	0.05	791.91	0.067087	2.1234	0.067087	11.0358	0.006978
UVRAG	611	617	VQLPGEF			5	789.414	Lipids	0.5	791.96	0.008571	2.17293	0.008571	11.0354	0.004245
UVRAG	611	617	VQLPGEF			5	789.414	Lipids	5	791.986	0.035735	2.19908	0.035735	11.0539	0.003522
UVRAG	611	617	VQLPGEF			5	789.414	Lipids	50	791.985	0.020277	2.19809	0.020277	11.0553	0.002998
UVRAG	613	625	LPGEFHPVSEAEL			10	1424.71	Apo	0	1425.36	2.27374e-13	0	0	4.49887	0
UVRAG	613	625	LPGEFHPVSEAEL			10	1424.71	Apo	0.005	1429	0.15924	3.64599	0.15924	4.48712	0.001751
UVRAG	613	625	LPGEFHPVSEAEL			10	1424.71	Apo	0.05	1428.94	0.105995	3.58394	0.105995	4.49324	0.001778
UVRAG	613	625	LPGEFHPVSEAEL			10	1424.71	Apo	0.5	1428.92	0.066569	3.56376	0.066569	4.49143	0.003104
UVRAG	613	625	LPGEFHPVSEAEL			10	1424.71	Apo	5	1428.99	0.119745	3.62766	0.119745	4.49883	0.003855
UVRAG	613	625	LPGEFHPVSEAEL			10	1424.71	Apo	50	1428.86	0.124902	3.50043	0.124902	4.49945	0.001951
UVRAG	613	625	LPGEFHPVSEAEL			10	1424.71	Lipids	0	1425.36	2.27374e-13	0	0	4.49887	0
UVRAG	613	625	LPGEFHPVSEAEL			10	1424.71	Lipids	0.005	1429.01	0.038604	3.64805	0.038604	4.48797	0.002788
UVRAG	613	625	LPGEFHPVSEAEL			10	1424.71	Lipids	0.05	1428.91	0.033907	3.55345	0.033907	4.4983	0.006567
UVRAG	613	625	LPGEFHPVSEAEL			10	1424.71	Lipids	0.5	1428.94	0.121005	3.58066	0.121005	4.50096	0.002352
UVRAG	613	625	LPGEFHPVSEAEL			10	1424.71	Lipids	5	1429.13	0.129072	3.77425	0.129072	4.50465	0.004616
UVRAG	613	625	LPGEFHPVSEAEL			10	1424.71	Lipids	50	1428.98	0.188157	3.61901	0.188157	4.50142	0.00366
UVRAG	628	634	TVEQAEE			6	805.357	Apo	0	805.68	0	0	0	5.54925	0
UVRAG	628	634	TVEQAEE			6	805.357	Apo	0.005	807.553	0.027909	1.87263	0.027909	5.54179	0.001718
UVRAG	628	634	TVEQAEE			6	805.357	Apo	0.05	808.196	0.009463	2.51549	0.009463	5.53985	0.0011
UVRAG	628	634	TVEQAEE			6	805.357	Apo	0.5	808.498	0.029568	2.81756	0.029568	5.53862	0.002275
UVRAG	628	634	TVEQAEE			6	805.357	Apo	5	808.61	0.010617	2.9292	0.010617	5.54483	0.004481
UVRAG	628	634	TVEQAEE			6	805.357	Apo	50	808.562	0.025017	2.88143	0.025017	5.53871	0.001779
UVRAG	628	634	TVEQAEE			6	805.357	Lipids	0	805.68	0	0	0	5.54925	0
UVRAG	628	634	TVEQAEE			6	805.357	Lipids	0.005	807.511	0.01224	1.83054	0.01224	5.54227	0.000729
UVRAG	628	634	TVEQAEE			6	805.357	Lipids	0.05	808.194	0.058893	2.51392	0.058893	5.54222	0.003783
UVRAG	628	634	TVEQAEE			6	805.357	Lipids	0.5	808.546	0.014087	2.86565	0.014087	5.54416	0.006226
UVRAG	628	634	TVEQAEE			6	805.357	Lipids	5	808.59	0.022332	2.91013	0.022332	5.54204	0.002697
UVRAG	628	634	TVEQAEE			6	805.357	Lipids	50	808.595	0.03216	2.91458	0.03216	5.53951	0.002247
UVRAG	639	649	EATGFASGDQL			10	1095.5	Apo	0	1095.99	0	0	0	4.64006	0
UVRAG	639	649	EATGFASGDQL			10	1095.5	Apo	0.005	1096.57	0.021524	0.575402	0.021524	4.63459	0.000855
UVRAG	639	649	EATGFASGDQL			10	1095.5	Apo	0.05	1097.11	0.029498	1.11799	0.029498	4.63752	0.003689
UVRAG	639	649	EATGFASGDQL			10	1095.5	Apo	0.5	1097.73	0.043952	1.7356	0.043952	4.63562	0.002269
UVRAG	639	649	EATGFASGDQL			10	1095.5	Apo	5	1098.51	0.091903	2.52146	0.091903	4.64176	0.004426
UVRAG	639	649	EATGFASGDQL			10	1095.5	Apo	50	1098.57	0.071233	2.58342	0.071233	4.63851	9.40663e-05
UVRAG	639	649	EATGFASGDQL			10	1095.5	Lipids	0	1095.99	0	0	0	4.64006	0
UVRAG	639	649	EATGFASGDQL			10	1095.5	Lipids	0.005	1096.49	0.028717	0.500978	0.028717	4.63639	0.001387
UVRAG	639	649	EATGFASGDQL			10	1095.5	Lipids	0.05	1097.11	0.072802	1.11918	0.072802	4.64255	0.001981
UVRAG	639	649	EATGFASGDQL			10	1095.5	Lipids	0.5	1097.71	0.162876	1.72322	0.162876	4.64525	0.003391
UVRAG	639	649	EATGFASGDQL			10	1095.5	Lipids	5	1098.38	0.011748	2.39311	0.011748	4.64404	0.000757
UVRAG	639	649	EATGFASGDQL			10	1095.5	Lipids	50	1098.48	0.017674	2.49247	0.017674	4.6446	9.14133e-05
UVRAG	641	651	TGFASGDQLEA			10	1095.5	Apo	0	1096.12	0	0	0	6.02415	0
UVRAG	641	651	TGFASGDQLEA			10	1095.5	Apo	0.005	1096.83	0.042343	0.715151	0.042343	6.04039	0.011041
UVRAG	641	651	TGFASGDQLEA			10	1095.5	Apo	0.05	1097.26	0.046742	1.14714	0.046742	6.0415	0.002746
UVRAG	641	651	TGFASGDQLEA			10	1095.5	Apo	0.5	1097.92	0.052146	1.80774	0.052146	6.04091	0.00443
UVRAG	641	651	TGFASGDQLEA			10	1095.5	Apo	5	1098.49	0.041292	2.37936	0.041292	6.05668	0.007106
UVRAG	641	651	TGFASGDQLEA			10	1095.5	Apo	50	1098.65	0.076855	2.53277	0.076855	6.06722	0.002647
UVRAG	641	651	TGFASGDQLEA			10	1095.5	Lipids	0	1096.12	0	0	0	6.02415	0
UVRAG	641	651	TGFASGDQLEA			10	1095.5	Lipids	0.005	1096.74	0.018619	0.621433	0.018619	6.04396	0.010699
UVRAG	641	651	TGFASGDQLEA			10	1095.5	Lipids	0.05	1097.29	0.03584	1.17334	0.03584	6.05449	0.005774
UVRAG	641	651	TGFASGDQLEA			10	1095.5	Lipids	0.5	1097.89	0.055233	1.77213	0.055233	6.05749	0.005945
UVRAG	641	651	TGFASGDQLEA			10	1095.5	Lipids	5	1098.61	0.030629	2.49532	0.030629	6.06998	0.003436
UVRAG	641	651	TGFASGDQLEA			10	1095.5	Lipids	50	1098.73	0.086541	2.61836	0.086541	6.07732	0.001592
UVRAG	644	651	ASGDQLEA			7	790.358	Apo	0	790.719	0	0	0	7.14162	0
UVRAG	644	651	ASGDQLEA			7	790.358	Apo	0.005	793.394	0.032958	2.67488	0.032958	7.14733	0.011149
UVRAG	644	651	ASGDQLEA			7	790.358	Apo	0.05	793.424	0.029303	2.705	0.029303	7.14926	0.002415
UVRAG	644	651	ASGDQLEA			7	790.358	Apo	0.5	793.448	0.028742	2.72812	0.028742	7.15005	0.002788
UVRAG	644	651	ASGDQLEA			7	790.358	Apo	5	793.474	0.02906	2.75426	0.02906	7.16194	0.001179
UVRAG	644	651	ASGDQLEA			7	790.358	Apo	50	793.419	0.052592	2.69921	0.052592	7.16496	0.001393
UVRAG	644	651	ASGDQLEA			7	790.358	Lipids	0	790.719	0	0	0	7.14162	0
UVRAG	644	651	ASGDQLEA			7	790.358	Lipids	0.005	793.359	0.011041	2.63999	0.011041	7.15786	0.004181
UVRAG	644	651	ASGDQLEA			7	790.358	Lipids	0.05	793.476	0.050543	2.75663	0.050543	7.16295	0.005049
UVRAG	644	651	ASGDQLEA			7	790.358	Lipids	0.5	793.483	0.016809	2.76385	0.016809	7.1644	0.008703
UVRAG	644	651	ASGDQLEA			7	790.358	Lipids	5	793.462	0.062387	2.74262	0.062387	7.16735	0.003233
UVRAG	644	651	ASGDQLEA			7	790.358	Lipids	50	793.453	0.02546	2.73409	0.02546	7.16797	0.001864
UVRAG	650	661	EAFNCIPVDSAV			10	1264.59	Apo	0	1265.3	0.036188	0	0	7.54374	0.000581
UVRAG	650	661	EAFNCIPVDSAV			10	1264.59	Apo	0.005	1265.47	0.118481	0.17122	0.123884	7.56894	0.017507
UVRAG	650	661	EAFNCIPVDSAV			10	1264.59	Apo	0.05	1265.45	0.044969	0.144258	0.057721	7.57381	0.00427
UVRAG	650	661	EAFNCIPVDSAV			10	1264.59	Apo	0.5	1265.52	0.058376	0.220628	0.068682	7.57498	0.007134
UVRAG	650	661	EAFNCIPVDSAV			10	1264.59	Apo	5	1265.56	0.052354	0.26202	0.063644	7.6049	0.011201
UVRAG	650	661	EAFNCIPVDSAV			10	1264.59	Apo	50	1265.8	0.095488	0.4986	0.102115	7.60961	0.004808
UVRAG	650	661	EAFNCIPVDSAV			10	1264.59	Lipids	0	1265.3	0.036188	0	0	7.54374	0.000581
UVRAG	650	661	EAFNCIPVDSAV			10	1264.59	Lipids	0.005	1265.49	0.079058	0.190229	0.086947	7.58795	0.010237
UVRAG	650	661	EAFNCIPVDSAV			10	1264.59	Lipids	0.05	1265.57	0.088962	0.269428	0.09604	7.59362	0.010826
UVRAG	650	661	EAFNCIPVDSAV			10	1264.59	Lipids	0.5	1265.59	0.051469	0.284529	0.062917	7.60137	0.00728
UVRAG	650	661	EAFNCIPVDSAV			10	1264.59	Lipids	5	1265.53	0.085023	0.231038	0.092404	7.61277	0.005242
UVRAG	650	661	EAFNCIPVDSAV			10	1264.59	Lipids	50	1265.72	0.075105	0.415954	0.083368	7.62355	0.003538
UVRAG	652	660	FNCIPVDSA			7	965.44	Apo	0	965.913	0.022029	0	0	10.1792	0.000996
UVRAG	652	660	FNCIPVDSA			7	965.44	Apo	0.005	968.427	0.082581	2.51357	0.085469	10.2003	0.010317
UVRAG	652	660	FNCIPVDSA			7	965.44	Apo	0.05	968.695	0.080873	2.78156	0.08382	10.1853	0.004957
UVRAG	652	660	FNCIPVDSA			7	965.44	Apo	0.5	968.728	0.069255	2.81428	0.072674	10.19	0.004014
UVRAG	652	660	FNCIPVDSA			7	965.44	Apo	5	968.784	0.048722	2.87094	0.053471	10.2094	0.005802
UVRAG	652	660	FNCIPVDSA			7	965.44	Apo	50	968.818	0.057583	2.90456	0.061653	10.2141	0.001427
UVRAG	652	660	FNCIPVDSA			7	965.44	Lipids	0	965.913	0.022029	0	0	10.1792	0.000996
UVRAG	652	660	FNCIPVDSA			7	965.44	Lipids	0.005	968.435	0.04178	2.52189	0.047232	10.199	0.009311
UVRAG	652	660	FNCIPVDSA			7	965.44	Lipids	0.05	968.72	0.055538	2.80686	0.059747	10.1986	0.004434
UVRAG	652	660	FNCIPVDSA			7	965.44	Lipids	0.5	968.791	0.046609	2.87784	0.051553	10.2004	0.005046
UVRAG	652	660	FNCIPVDSA			7	965.44	Lipids	5	968.867	0.050594	2.95328	0.055182	10.2135	0.004474
UVRAG	652	660	FNCIPVDSA			7	965.44	Lipids	50	968.849	0.04403	2.93602	0.049233	10.2165	0.00298
UVRAG	652	661	FNCIPVDSAV			8	1064.51	Apo	0	1065.05	0	0	0	10.9932	0
UVRAG	652	661	FNCIPVDSAV			8	1064.51	Apo	0.005	1068.19	0.088706	3.13058	0.088706	10.9914	0.004785
UVRAG	652	661	FNCIPVDSAV			8	1064.51	Apo	0.05	1068.68	0.109598	3.62247	0.109598	10.9829	0.004099
UVRAG	652	661	FNCIPVDSAV			8	1064.51	Apo	0.5	1068.54	0.106176	3.48521	0.106176	10.9855	0.006274
UVRAG	652	661	FNCIPVDSAV			8	1064.51	Apo	5	1068.6	0.117751	3.54968	0.117751	11.0098	0.008954
UVRAG	652	661	FNCIPVDSAV			8	1064.51	Apo	50	1068.64	0.009233	3.58499	0.009233	11.0173	0.001404
UVRAG	652	661	FNCIPVDSAV			8	1064.51	Lipids	0	1065.05	0	0	0	10.9932	0
UVRAG	652	661	FNCIPVDSAV			8	1064.51	Lipids	0.005	1068.13	0.187699	3.07237	0.187699	10.9967	0.006934
UVRAG	652	661	FNCIPVDSAV			8	1064.51	Lipids	0.05	1068.68	0.081514	3.62133	0.081514	10.9943	0.008612
UVRAG	652	661	FNCIPVDSAV			8	1064.51	Lipids	0.5	1068.65	0.109698	3.60032	0.109698	10.999	0.004228
UVRAG	652	661	FNCIPVDSAV			8	1064.51	Lipids	5	1068.77	0.048564	3.71386	0.048564	11.0126	0.000771
UVRAG	652	661	FNCIPVDSAV			8	1064.51	Lipids	50	1068.76	0.046118	3.71005	0.046118	11.0175	0.004408
UVRAG	652	668	FNCIPVDSAVAVECDEQ			15	1838.79	Apo	0	1839.52	0	0	0	11.0616	0
UVRAG	652	668	FNCIPVDSAVAVECDEQ			15	1838.79	Apo	0.005	1841.11	0.049645	1.5903	0.049645	11.095	0.013056
UVRAG	652	668	FNCIPVDSAVAVECDEQ			15	1838.79	Apo	0.05	1842.19	0.064714	2.66939	0.064714	11.084	0.004281
UVRAG	652	668	FNCIPVDSAVAVECDEQ			15	1838.79	Apo	0.5	1842.91	0.119089	3.39108	0.119089	11.0911	0.008199
UVRAG	652	668	FNCIPVDSAVAVECDEQ			15	1838.79	Apo	5	1843.65	0.036586	4.13411	0.036586	11.1192	0.011672
UVRAG	652	668	FNCIPVDSAVAVECDEQ			15	1838.79	Apo	50	1844.52	0.115162	4.99992	0.115162	11.1292	0.003492
UVRAG	652	668	FNCIPVDSAVAVECDEQ			15	1838.79	Lipids	0	1839.52	0	0	0	11.0616	0
UVRAG	652	668	FNCIPVDSAVAVECDEQ			15	1838.79	Lipids	0.005	1840.94	2.27374e-13	1.42345	2.27374e-13	11.0967	0
UVRAG	652	668	FNCIPVDSAVAVECDEQ			15	1838.79	Lipids	0.05	1842.32	0.066266	2.7978	0.066266	11.0996	0.008128
UVRAG	652	668	FNCIPVDSAVAVECDEQ			15	1838.79	Lipids	0.5	1842.83	0.078514	3.30915	0.078514	11.107	0.005645
UVRAG	652	668	FNCIPVDSAVAVECDEQ			15	1838.79	Lipids	5	1843.69	0.051887	4.17122	0.051887	11.1227	0.006196
UVRAG	652	668	FNCIPVDSAVAVECDEQ			15	1838.79	Lipids	50	1844.59	0.074267	5.07526	0.074267	11.1326	0.004333
UVRAG	658	668	DSAVAVECDEQ			10	1165.47	Apo	0	1166.2	0.062648	0	0	9.87562	0.000896
UVRAG	658	668	DSAVAVECDEQ			10	1165.47	Apo	0.005	1166.62	0.084954	0.419161	0.105556	9.88851	0.008844
UVRAG	658	668	DSAVAVECDEQ			10	1165.47	Apo	0.05	1166.87	0.059126	0.666079	0.086143	9.88603	0.004423
UVRAG	658	668	DSAVAVECDEQ			10	1165.47	Apo	0.5	1166.9	0.096509	0.69848	0.11506	9.88587	0.003996
UVRAG	658	668	DSAVAVECDEQ			10	1165.47	Apo	5	1166.99	0.095645	0.790413	0.114336	9.90513	0.009064
UVRAG	658	668	DSAVAVECDEQ			10	1165.47	Apo	50	1167.18	0.113483	0.982824	0.129627	9.90929	0.002945
UVRAG	658	668	DSAVAVECDEQ			10	1165.47	Lipids	0	1166.2	0.062648	0	0	9.87562	0.000896
UVRAG	658	668	DSAVAVECDEQ			10	1165.47	Lipids	0.005	1166.61	0.067814	0.412249	0.092323	9.8955	0.008271
UVRAG	658	668	DSAVAVECDEQ			10	1165.47	Lipids	0.05	1166.86	0.04691	0.658091	0.078264	9.89564	0.006381
UVRAG	658	668	DSAVAVECDEQ			10	1165.47	Lipids	0.5	1167.02	0.063905	0.818805	0.089491	9.89821	0.005758
UVRAG	658	668	DSAVAVECDEQ			10	1165.47	Lipids	5	1167.04	0.129051	0.838219	0.143454	9.90809	0.004133
UVRAG	658	668	DSAVAVECDEQ			10	1165.47	Lipids	50	1167.26	0.128696	1.06262	0.143134	9.90792	0.003885
VPS15	20	28	FSDIHDFEY			8	1172.49	Apo	0	1173.04	0	0	0	13.3125	0
VPS15	20	28	FSDIHDFEY			8	1172.49	Apo	0.005	1173.23	0.07946	0.1897	0.07946	13.3066	0.001563
VPS15	20	28	FSDIHDFEY			8	1172.49	Apo	0.05	1173.47	0.07148	0.424116	0.07148	13.3032	0.004462
VPS15	20	28	FSDIHDFEY			8	1172.49	Apo	0.5	1173.95	0.164094	0.908263	0.164094	13.3021	0.006647
VPS15	20	28	FSDIHDFEY			8	1172.49	Apo	5	1174.36	0.021885	1.31227	0.021885	13.3095	0.013353
VPS15	20	28	FSDIHDFEY			8	1172.49	Apo	50	1174.5	0.135955	1.45866	0.135955	13.3162	0.007772
VPS15	20	28	FSDIHDFEY			8	1172.49	Lipids	0	1173.04	0	0	0	13.3125	0
VPS15	20	28	FSDIHDFEY			8	1172.49	Lipids	0.005	1173.22	0.027088	0.173211	0.027088	13.3014	0.003269
VPS15	20	28	FSDIHDFEY			8	1172.49	Lipids	0.05	1173.42	0.065877	0.38146	0.065877	13.3099	0.008843
VPS15	20	28	FSDIHDFEY			8	1172.49	Lipids	0.5	1173.82	0.097209	0.773694	0.097209	13.3197	0.025366
VPS15	20	28	FSDIHDFEY			8	1172.49	Lipids	5	1174.43	0.028469	1.39087	0.028469	13.3157	0.001044
VPS15	20	28	FSDIHDFEY			8	1172.49	Lipids	50	1174.55	0.057963	1.50195	0.057963	13.3195	0.01026
VPS15	21	29	SDIHDFEYD			8	1140.45	Apo	0	1140.74	0	0	0	10.3767	0
VPS15	21	29	SDIHDFEYD			8	1140.45	Apo	0.005	1141.27	0.160275	0.532948	0.160275	10.4261	0.00941
VPS15	21	29	SDIHDFEYD			8	1140.45	Apo	0.05	1141.47	0.171578	0.730267	0.171578	10.4127	0.004602
VPS15	21	29	SDIHDFEYD			8	1140.45	Apo	0.5	1141.81	0.153983	1.07622	0.153983	10.4152	0.005897
VPS15	21	29	SDIHDFEYD			8	1140.45	Apo	5	1142.54	0.04692	1.80357	0.04692	10.453	0.007122
VPS15	21	29	SDIHDFEYD			8	1140.45	Apo	50	1143.31	0.066819	2.57823	0.066819	10.4598	0.005027
VPS15	21	29	SDIHDFEYD			8	1140.45	Lipids	0	1140.74	0	0	0	10.3767	0
VPS15	21	29	SDIHDFEYD			8	1140.45	Lipids	0.005	1141.28	0.04313	0.546902	0.04313	10.4302	0.007817
VPS15	21	29	SDIHDFEYD			8	1140.45	Lipids	0.05	1141.56	0.074683	0.825981	0.074683	10.4356	0.004413
VPS15	21	29	SDIHDFEYD			8	1140.45	Lipids	0.5	1141.79	0.067928	1.05925	0.067928	10.4423	0.005517
VPS15	21	29	SDIHDFEYD			8	1140.45	Lipids	5	1142.54	0.094413	1.80599	0.094413	10.4698	0.004292
VPS15	21	29	SDIHDFEYD			8	1140.45	Lipids	50	1143.25	0.028282	2.5134	0.028282	10.4816	0.005681
VPS15	28	37	YDKSLGSTRF			9	1173.59	Apo	0	1174.06	0	0	0	8.10763	0
VPS15	28	37	YDKSLGSTRF			9	1173.59	Apo	0.005	1175.83	0	1.76593	0	8.16511	0
VPS15	28	37	YDKSLGSTRF			9	1173.59	Apo	0.05	1176.19	0.009574	2.12242	0.009574	8.15444	8.76582e-05
VPS15	28	37	YDKSLGSTRF			9	1173.59	Apo	0.5	1176.59	0.032799	2.52784	0.032799	8.16252	0.00666
VPS15	28	37	YDKSLGSTRF			9	1173.59	Apo	5	1176.93	0	2.86702	0	8.19214	0
VPS15	28	37	YDKSLGSTRF			9	1173.59	Apo	50	1177.54	0.073485	3.47839	0.073485	8.19734	0.001019
VPS15	28	37	YDKSLGSTRF			9	1173.59	Lipids	0	1174.06	0	0	0	8.10763	0
VPS15	28	37	YDKSLGSTRF			9	1173.59	Lipids	0.005	1175.82	0.170541	1.75703	0.170541	8.17611	0.009768
VPS15	28	37	YDKSLGSTRF			9	1173.59	Lipids	0.05	1176.22	0.012667	2.15944	0.012667	8.18436	0.008957
VPS15	28	37	YDKSLGSTRF			9	1173.59	Lipids	0.5	1176.49	0.036391	2.42559	0.036391	8.18488	0.004351
VPS15	28	37	YDKSLGSTRF			9	1173.59	Lipids	5	1177.06	0.040211	2.99267	0.040211	8.20359	0.007561
VPS15	28	37	YDKSLGSTRF			9	1173.59	Lipids	50	1177.66	0	3.59757	0	8.21383	0
VPS15	36	51	RFFKVARAKHREGLVV			15	1913.13	Apo	0	1914.09	0.007414	0	0	8.09427	0.002957
VPS15	36	51	RFFKVARAKHREGLVV			15	1913.13	Apo	0.005	1914.6	0.060009	0.504506	0.060466	8.11274	0.013554
VPS15	36	51	RFFKVARAKHREGLVV			15	1913.13	Apo	0.05	1914.78	0.101513	0.685061	0.101784	8.11476	0.00293
VPS15	36	51	RFFKVARAKHREGLVV			15	1913.13	Apo	0.5	1914.85	0.058575	0.75448	0.059042	8.11851	0.002906
VPS15	36	51	RFFKVARAKHREGLVV			15	1913.13	Apo	5	1915.72	0.102495	1.63088	0.102762	8.13556	0.008284
VPS15	36	51	RFFKVARAKHREGLVV			15	1913.13	Apo	50	1918.78	0.055764	4.68731	0.056255	8.11675	0.00234
VPS15	36	51	RFFKVARAKHREGLVV			15	1913.13	Lipids	0	1914.09	0.007414	0	0	8.09427	0.002957
VPS15	36	51	RFFKVARAKHREGLVV			15	1913.13	Lipids	0.005	1914.69	0.09671	0.60226	0.096994	8.12685	0.005263
VPS15	36	51	RFFKVARAKHREGLVV			15	1913.13	Lipids	0.05	1914.75	0.077541	0.655061	0.077895	8.13421	0.008312
VPS15	36	51	RFFKVARAKHREGLVV			15	1913.13	Lipids	0.5	1914.9	0.063316	0.808208	0.063749	8.13883	0.006838
VPS15	36	51	RFFKVARAKHREGLVV			15	1913.13	Lipids	5	1915.63	0.15197	1.53582	0.152151	8.14827	0.004309
VPS15	36	51	RFFKVARAKHREGLVV			15	1913.13	Lipids	50	1919.02	0.273343	4.92444	0.273444	8.12736	0.004824
VPS15	38	49	FKVARAKHREGL			11	1411.83	Apo	0	1412.56	0.060148	0	0	5.26169	0.00063
VPS15	38	49	FKVARAKHREGL			11	1411.83	Apo	0.005	1412.96	0.091028	0.398321	0.109105	5.28145	0.006799
VPS15	38	49	FKVARAKHREGL			11	1411.83	Apo	0.05	1413.03	0.101296	0.47392	0.117807	5.29098	0.004447
VPS15	38	49	FKVARAKHREGL			11	1411.83	Apo	0.5	1413.28	0.105245	0.720505	0.121219	5.29765	0.010901
VPS15	38	49	FKVARAKHREGL			11	1411.83	Apo	5	1413.67	0.08088	1.10815	0.100793	5.32133	0.008489
VPS15	38	49	FKVARAKHREGL			11	1411.83	Apo	50	1413.94	0.102231	1.38343	0.118612	5.3361	0.006978
VPS15	38	49	FKVARAKHREGL			11	1411.83	Lipids	0	1412.56	0.060148	0	0	5.26169	0.00063
VPS15	38	49	FKVARAKHREGL			11	1411.83	Lipids	0.005	1413.03	0.066121	0.473419	0.089386	5.28731	0.003239
VPS15	38	49	FKVARAKHREGL			11	1411.83	Lipids	0.05	1413.12	0.10638	0.555959	0.122206	5.29827	0.012057
VPS15	38	49	FKVARAKHREGL			11	1411.83	Lipids	0.5	1413.28	0.1321	0.719051	0.145149	5.31614	0.008989
VPS15	38	49	FKVARAKHREGL			11	1411.83	Lipids	5	1413.66	0.046272	1.09735	0.075887	5.33637	0.010539
VPS15	38	49	FKVARAKHREGL			11	1411.83	Lipids	50	1414	0.079452	1.43595	0.099651	5.36755	0.008398
VPS15	38	51	FKVARAKHREGLVV			13	1609.96	Apo	0	1610.87	0.047693	0	0	6.36057	0.00234
VPS15	38	51	FKVARAKHREGLVV			13	1609.96	Apo	0.005	1611.17	0.077309	0.30013	0.090837	6.40793	0.026296
VPS15	38	51	FKVARAKHREGLVV			13	1609.96	Apo	0.05	1611.41	0.039519	0.539912	0.061939	6.43916	0.002465
VPS15	38	51	FKVARAKHREGLVV			13	1609.96	Apo	0.5	1611.55	0.11121	0.674793	0.121005	6.4354	0.003899
VPS15	38	51	FKVARAKHREGLVV			13	1609.96	Apo	5	1611.91	0.076867	1.04189	0.090461	6.4704	0.010156
VPS15	38	51	FKVARAKHREGLVV			13	1609.96	Apo	50	1612.27	0.103486	1.39398	0.113947	6.50421	0.013242
VPS15	38	51	FKVARAKHREGLVV			13	1609.96	Lipids	0	1610.87	0.047693	0	0	6.36057	0.00234
VPS15	38	51	FKVARAKHREGLVV			13	1609.96	Lipids	0.005	1611.27	0.046814	0.403448	0.06683	6.4414	0.010735
VPS15	38	51	FKVARAKHREGLVV			13	1609.96	Lipids	0.05	1611.39	0.034402	0.517974	0.058806	6.44719	0.01063
VPS15	38	51	FKVARAKHREGLVV			13	1609.96	Lipids	0.5	1611.62	0.064083	0.751554	0.079883	6.46867	0.007176
VPS15	38	51	FKVARAKHREGLVV			13	1609.96	Lipids	5	1611.93	0.039001	1.05993	0.061609	6.50498	0.007525
VPS15	38	51	FKVARAKHREGLVV			13	1609.96	Lipids	50	1612.25	0.106724	1.38325	0.116896	6.55366	0.01632
VPS15	39	49	KVARAKHREGL			10	1264.76	Apo	0	1265.58	0	0	0	5.25609	0
VPS15	39	49	KVARAKHREGL			10	1264.76	Apo	0.005	1265.95	0.038007	0.374618	0.038007	5.28626	0.008887
VPS15	39	49	KVARAKHREGL			10	1264.76	Apo	0.05	1265.82	0.080657	0.246303	0.080657	5.29287	0.002604
VPS15	39	49	KVARAKHREGL			10	1264.76	Apo	0.5	1265.92	0.071678	0.344573	0.071678	5.29628	0.013501
VPS15	39	49	KVARAKHREGL			10	1264.76	Apo	5	1266.17	0.031687	0.594079	0.031687	5.32803	0.008405
VPS15	39	49	KVARAKHREGL			10	1264.76	Apo	50	1266.54	0.121969	0.968424	0.121969	5.34618	0.009412
VPS15	39	49	KVARAKHREGL			10	1264.76	Lipids	0	1265.58	0	0	0	5.25609	0
VPS15	39	49	KVARAKHREGL			10	1264.76	Lipids	0.005	1265.84	0.035943	0.263647	0.035943	5.28949	0.005234
VPS15	39	49	KVARAKHREGL			10	1264.76	Lipids	0.05	1265.98	0.017939	0.39987	0.017939	5.30444	0.011218
VPS15	39	49	KVARAKHREGL			10	1264.76	Lipids	0.5	1266.15	0.029731	0.577232	0.029731	5.31995	0.005008
VPS15	39	49	KVARAKHREGL			10	1264.76	Lipids	5	1266.32	0.061913	0.746535	0.061913	5.34439	0.009535
VPS15	39	49	KVARAKHREGL			10	1264.76	Lipids	50	1266.62	0.068813	1.04635	0.068813	5.37144	0.008233
VPS15	40	51	VARAKHREGLVV			11	1334.8	Apo	0	1335.52	0	0	0	8.42613	0
VPS15	40	51	VARAKHREGLVV			11	1334.8	Apo	0.005	1336.53	0.084474	1.00386	0.084474	8.48131	0.010028
VPS15	40	51	VARAKHREGLVV			11	1334.8	Apo	0.05	1337.3	0.107375	1.77671	0.107375	8.46711	0.002664
VPS15	40	51	VARAKHREGLVV			11	1334.8	Apo	0.5	1337.88	0.017818	2.3603	0.017818	8.48325	0.002689
VPS15	40	51	VARAKHREGLVV			11	1334.8	Apo	5	1338.57	0.047445	3.05067	0.047445	8.51114	0.009807
VPS15	40	51	VARAKHREGLVV			11	1334.8	Apo	50	1339.12	0.149295	3.59875	0.149295	8.53361	0.005609
VPS15	40	51	VARAKHREGLVV			11	1334.8	Lipids	0	1335.52	0	0	0	8.42613	0
[truncated: 3,437 more rows]
