# Supplementary material for: Membrane characteristics tune activities of endosomal and autophagic human VPS34 complexes
Source: eLife. 2020 Jun 30;9:e58281. doi: 10.7554/eLife.58281 (PMC7326497; doi:10.7554/eLife.58281)
Supplement: Supplementary file 6. [file elife-58281-supp6.xlsx]

## Sheet: Sheet1
Supplementary File 6. Summary of plasmids used to express the proteins and protein complexes
ID	Construct	Backbone	Use	Figure number
pYO1025	HsVPS34 + HsVPS15-3xTEV-ZZ	pCAG	HDX-MS, MALS, and GUV assays, cotransfected with one or two of the below plasmids	1, 2, 3, 4, 5, 6, 7, 8, 9
pYO1006	HsBeclin 1, untagged	pCAG	GUV assays, cotransfected with pYO1025 and either pYO1017, 1077, 1123, or 1124	7, 8, 9
pYO1017	ZZ-3XTEV-HsATG14L	pCAG	GUV assays, cotransfected with pYO1025 and pYO1006	7
pYO1018	ZZ-3XTEV-HsUVRAG	pCAG	GUV assays, cotransfected with pYO1025 and pYO1006 or pYO1190	8
pYO1023	HsBeclin 1 + ZZ-3XTEV-UVRAG	pCAG	GUV assays, cotransfected with pYO1025	8
pYO1031	HsBeclin 1 + HsUVRAG, both untagged	pCAG	HDX-MS, MALS, and GUV assays, cotransfected with pYO1025	1, 2, 4, 6, 7, 9
pYO1051	HsBeclin 1 AFM1 (FFW/DDD at 359-361), untagged + ZZ-3xTEV-HsATG14L	pCAG	GUV assays, cotransfected with pYO1025	8
pYO1052	HsBeclin 1 AFM1 (FFW/DDD at 359-361), untagged + ZZ-3xTEV-HsUVRAG	pCAG	GUV assays, cotransfected with pYO1025	8
pYO1077	ZZ_3xTEV-ATG14 delta ALPS (1-470)	pCAG	GUV assays, cotransfected with pYO1025 and pYO1006	7
pYO1101	HsBeclin 1 + HsATG14L, both untagged	pCAG	HDX-MS, MALS, and GUV assays, cotransfected with pYO1025	1, 2, 3, 4, 5, 7, 9
pYO1118	HsBeclin 1 AFM2 (Q418D F419D), untagged + ZZ-3xTEV-HsATG14L	pCAG	GUV assays, cotransfected with pYO1025	8
pYO1120	HsBeclin 1 AFM2 (Q418D F419D), untagged + ZZ-3xTEV-UVRAG	pCAG	GUV assays, cotransfected with pYO1025	8
pYO1123	HsUVRAG + HsATG14L BATS domain(413-492) fusion, untagged	pCAG	GUV assays, cotransfected with pYO1025 and pYO1006	7
pYO1124	HsUVRAG delta Cter (1-464) + HsATG14L BATS domain(413-492) fusion, untagged	pCAG	GUV assays, cotransfected with pYO1025 and pYO1006	7
pYO1125	GST-TEV-Cys-PX (2-149)	pOP	GUV assays	1, 2, 3, 4, 7, 8, 9
pYO1134	HsBeclin 1 AFM1+HLM (FFW/DDD at 359-361 and L293A V296A), untagged + ZZ-HsATG14L	pCAG	GUV assays, cotransfected with pYO1025	8
pYO1190	HsBeclin1 HLM+AFM2 (L293A V296A+ Q418D F419D)	pcDNA4/TO	GUV assays, cotransfected with pYO1025 and either pYO1017 or pYO1018	8
pSM41	His6-TEV-HsVPS34	pOP	GUV assays	4, 7
